# Supplementary material for: Responsiveness to Hedgehog Pathway Inhibitors in T-Cell Acute Lymphoblastic Leukemia Cells Is Highly Dependent on 5′AMP-Activated Kinase Inactivation
Source: Int J Mol Sci. 2021 Jun 15;22(12):6384. doi: 10.3390/ijms22126384 (PMC8232330; doi:10.3390/ijms22126384)
Supplement: Supplementary file 1 [file ijms-22-06384-s001.zip › Supplementary Table S1_MIX_A_phosphopeptides_Total.xlsx]

## Sheet: Cytoplasmic
Accession	Description	Score	Coverage	# Proteins	# Unique Peptides	# Peptides	# PSMs	Area	Heavy/Light	Heavy/Light Count	Heavy/Light Variability [%]	# AAs	MW [kDa]	calc. pI
P08238	Heat shock protein HSP 90-beta OS=Homo sapiens GN=HSP90AB1 PE=1 SV=4 - [HS90B_HUMAN]	1582.97	35.91	1	15	23	110	7.86423e+07	0.836837	66	12.3943	724	83.2121	5.03369
	A2	Sequence	# PSMs	# Proteins	# Protein Groups	Protein Group Accessions	Modifications	ΔCn	Area	Heavy/Light	Heavy/Light Count	Heavy/Light Variability [%]	q-Value	PEP	IonScore	Exp Value	Charge	MH+ [Da]	ΔM [ppm]	RT [min]	# Missed Cleavages
	High	IEDVGsDEEDDSGk	2	1	1	P08238	S6(Phospho); K14(Lys8)	0	6.22397e+07	0.856368	2	3.33654	0	1.549e-12	101.96	6.70546e-09	2	1582.59	0.845436	21.6396	0
	High	IEDVGsDEEDDSGK	2	1	1	P08238	S6(Phospho)	0	7.99053e+07				0	6.426e-12	82.85	4.30604e-07	2	1574.58	0.641831	21.6123	0
	High	ELISNASDALDK	3	1	1	P08238		0	6.57966e+06	0.836359	1		0	5.859e-08	82.56	1.36521e-06	2	1275.64	1.04988	33.8363	0
	High	NPDDITQEEYGEFYK	3	1	1	P08238		0	7.35624e+06	0.747632	2	1.82972	0	1.068e-16	82.56	1.77979e-06	2	1847.8	-0.2126	40.1057	0
	High	NPDDITQEEYGEFYk	4	1	1	P08238	K15(Lys8)	0	4.86603e+06	0.723163	1		0	3.786e-14	68.55	4.70925e-05	2	1855.81	1.87226	40.1361	0
	High	SIYYITGESK	3	1	1	P08238		0	4.65449e+06	0.780874	1		0	7.677e-06	63.04	9.1224e-05	2	1160.58	0.858951	34.2963	0
	High	EQVANSAFVER	3	1	1	P08238		0	7.80405e+06	0.890288	1		0	6.162e-05	62.5	0.000125318	2	1249.62	0.320106	26.8829	0
	High	ELISNASDALDk	3	1	1	P08238	K12(Lys8)	0	5.24322e+06	0.864408	2	1.94669	0	1.125e-06	61.63	0.000158678	2	1283.66	0.442487	35.2241	0
	High	IEDVGsDEEDDSGkDkk	3	1	1	P08238	S6(Phospho); K14(Lys8); K16(Lys8); K17(Lys8)	0	115465142	0.856814	3	0.995041	0	2.212e-05	60.22	0.000326533	2	1969.84	0.716459	17.7752	2
	High	ADLINNLGTIAK	3	3	2	P07900;P08238		0	1.34107e+07	0.901086	2	4.07252	0	1.544e-06	59.55	0.000180185	2	1242.71	0.357909	42.2339	0
	High	SIYYITGESk	3	1	1	P08238	K10(Lys8)	0	3.89774e+06	0.891197	2	0.952935	0	7.818e-06	53.53	0.000857274	2	1168.6	0.401986	34.2909	0
	High	EkEIsDDEAEEEk	2	1	1	P08238	K2(Lys8); S5(Phospho); K13(Lys8)	0	3.15828e+06	0.771408	1		0	1.576e-06	50.93	0.00138441	2	1646.66	-0.457889	20.9875	1
	High	EDQTEYLEER	3	3	2	P07900;P08238		0	8.84191e+06	0.783838	2	2.87856	0	0.0004713	50.9	0.00133385	2	1311.57	0.397134	28.0982	0
	High	ADLINNLGTIAk	3	3	2	P07900;P08238	K12(Lys8)	0	1.11785e+07	0.854147	1		0	0.0001077	49.35	0.00175611	2	1250.72	0.324558	42.5792	0
	High	EQVANSAFVEr	3	1	1	P08238	R11(Arg10)	0	6.27518e+06	0.835097	2	3.44091	0	0.0007926	43.55	0.00942091	2	1259.63	0.439703	29.3328	0
	High	EDQTEYLEEr	3	3	2	P07900;P08238	R10(Arg10)	0	6.93634e+06	0.871649	1		0	0.001663	42.23	0.0102149	2	1321.58	0.602908	28.1039	0
	High	SLTNDWEDHLAVk	1	3	2	P07900;P08238	K13(Lys8)	0	1.1124e+06	0.939657	1		0	6.604e-06	41.52	0.0235579	2	1535.76	1.61832	41.7775	0
	High	YESLTDPSK	3	3	2	P07900;P08238		0	5.8875e+06	0.742486	3	2.53801	0	2.341e-05	40.62	0.0116173	2	1039.49	-0.187732	25.1205	0
	High	IDIIPNPQER	1	1	1	P08238		0	7.42374e+06	0.60819	1		0	0.003803	40.23	0.0192102	2	1194.65	0.904039	36.8781	0
	High	EKEIsDDEAEEEKGEK	3	1	1	P08238	S5(Phospho)	0	6.07398e+06	0.85735	2	7.00183	0	0.005639	39.8	0.0293353	2	1944.8	1.2305	20.9579	2
	High	YHTSQSGDEmTSLSEYVSR	4	1	1	P08238	M10(Oxidation)	0	6.10709e+06	0.875137	2	1.51132	0	1.174e-10	38.73	0.0563334	2	2192.94	1.38468	34.9065	0
	High	YIDQEELNK	3	3	2	P07900;P08238		0	9.66544e+06	0.855318	2	0.524743	0	0.003597	38.49	0.0265957	2	1151.56	0.510594	26.8796	0
	High	IEDVGsDEEDDSGkDk	4	1	1	P08238	S6(Phospho); K14(Lys8); K16(Lys8)	0	40556588	0.806309	3	5.00648	0	0.00334	34.95	0.0555968	2	1833.72	-0.940372	19.4923	1
	High	EKEIsDDEAEEEK	3	1	1	P08238	S5(Phospho)	0	4.7137e+06	0.76735	2	4.49055	0	0.0009418	34.6	0.044261	2	1630.64	-0.564469	20.9936	1
	High	IEDVGsDEEDDSGKDK	3	1	1	P08238	S6(Phospho)	0	8.9279e+06	1.12654	1		0	5.952e-05	34.14	0.0536971	2	1817.7	-0.570141	19.4749	1
	High	YHTSQSGDEmTSLSEYVSr	4	1	1	P08238	M10(Oxidation); R19(Arg10)	0	5.07926e+06	0.944041	3	2.36846	0	1.421e-07	33.25	0.220512	2	2202.95	1.282	34.9002	0
	High	YIDQEELNk	2	3	2	P07900;P08238	K9(Lys8)	0	4.984e+06	0.797563	1		0	0.001298	31.29	0.13835	2	1159.57	0.368295	26.9514	0
	High	IEDVGsDEEDDSGKDKK	3	1	1	P08238	S6(Phospho)	0	4.96641e+07	0.639444	2	24.6731	0	0.001765	29.96	0.254483	2	1945.79	0.847936	19.3185	2
	High	LGIHEDSTNR	1	1	1	P08238		0	2.30504e+06	0.739638	1		0	0.008116	26.63	0.380766	2	1141.56	0.167098	21.0943	0
	High	LVSSPccIVTSTYGWTANmEr	3	1	1	P08238	C6(Carbamidomethyl); C7(Carbamidomethyl); M19(Oxidation); R21(Arg10)	0	870819	0.704994	2	18.4332	0	7.906e-05	24.2	2.64783	2	2458.11	0.446228	48.7006	0
	High	HNDDEQYAWESSAGGSFTVR	2	3	2	P07900;P08238		0	1.46782e+06	1.06779	2	12.3769	0	1.114e-05	23.7	1.89593	2	2255.96	0.811033	41.6057	0
	High	SLTNDWEDHLAVK	4	3	2	P07900;P08238		0	1.43777e+06	0.908096	3	9.17315	0	0.002175	23.06	1.50962	2	1527.75	1.09292	40.2229	0
	High	LVSSPccIVTSTYGWTANmER	4	1	1	P08238	C6(Carbamidomethyl); C7(Carbamidomethyl); M19(Oxidation)	0	1.40229e+06	0.870195	1		0	3.16e-06	21.53	4.82167	2	2448.1	2.23014	48.6564	0
	High	GFEVVYmTEPIDEYcVQQLK	1	1	1	P08238	M7(Oxidation); C15(Carbamidomethyl)	0	506265	0.760424	1		0	0.0001402	18.84	9.36982	2	2464.14	0.491564	50.6436	0
	High	ADHGEPIGR	2	1	1	P08238		0	1.80114e+06	0.0821602	2	13096.4	0	0.006368	13.52	4.59526	2	951.464	0.0859386	15.817	0
	High	HNDDEQYAWESSAGGSFTVr	1	3	2	P07900;P08238	R20(Arg10)	0	806152				0	0.003145	11.63	32.5258	2	2265.97	2.00664	41.6878	0
	High	EGLELPEDEEEk	3	3	2	P07900;P08238	K12(Lys8)	0	3.05576e+06	0.66308	3	3.04566	0.001	0.01487	28.5	0.349815	2	1424.65	0.916392	33.0921	0
	High	IDIIPNPQEr	1	1	1	P08238	R10(Arg10)	0	4.11056e+06				0.001	0.01319	27.78	0.338451	2	1204.66	0.720247	36.9398	0
	High	ADHGEPIGr	1	1	1	P08238	R9(Arg10)	0	1.09424e+06				0.004	0.03179	13.99	4.90202	2	961.473	0.118099	17.1483	0
	High	LGIHEDSTNr	1	1	1	P08238	R10(Arg10)	0	1.20709e+06	1.03689	1		0.005	0.03338	17.73	3.01387	2	1151.57	-0.0187635	18.5234	0
	High	EkEIsDDEAEEEkGEk	1	1	1	P08238	K2(Lys8); S5(Phospho); K13(Lys8); K16(Lys8)	0	2.47113e+06	0.768096	1		0.006	0.03557	41	0.0265306	2	1968.84	0.350271	20.9641	2
	High	YESLTDPSKLDSGK	1	3	2	P07900;P08238		0	1.25678e+06	0.736505	1		0.006	0.03644	26.49	0.697174	2	1539.75	0.765779	29.4832	1
	High	EGLELPEDEEEK	2	3	2	P07900;P08238		0	5.12048e+06				0.006	0.04235	18.09	3.27088	2	1416.64	0.259644	33.0658	0
	High	YESLTDPSkLDSGk	1	3	2	P07900;P08238	K9(Lys8); K14(Lys8)	0	794875	0.763592	1		0.006	0.05611	15.11	10.2007	2	1555.78	1.33565	31.8099	1
	High	YESLTDPSk	1	3	2	P07900;P08238	K9(Lys8)	0	3.81986e+06				0.007	0.07204	19.77	1.52253	2	1047.51	-0.106844	22.7773	0
P11142	Heat shock cognate 71 kDa protein OS=Homo sapiens GN=HSPA8 PE=1 SV=1 - [HSP7C_HUMAN]	1502.14	45.2	1	19	19	102	8.74183e+06	0.734722	57	13.5837	646	70.8542	5.51611
	A2	Sequence	# PSMs	# Proteins	# Protein Groups	Protein Group Accessions	Modifications	ΔCn	Area	Heavy/Light	Heavy/Light Count	Heavy/Light Variability [%]	q-Value	PEP	IonScore	Exp Value	Charge	MH+ [Da]	ΔM [ppm]	RT [min]	# Missed Cleavages
	High	IINEPTAAAIAYGLDk	4	1	1	P11142	K16(Lys8)	0	2.60174e+06	0.650807	2	3.18355	0	2.167e-13	80.65	2.41767e-06	2	1667.91	1.0865	46.0516	0
	High	DAGTIAGLNVLr	3	1	1	P11142	R12(Arg10)	0	4.51826e+06	0.72946	2	0.593895	0	6.845e-09	77.87	2.75578e-06	2	1209.68	-0.249425	45.1246	0
	High	TTPSYVAFTDTER	3	1	1	P11142		0	8.25742e+06	0.723483	3	11.9411	0	9.111e-08	75.96	7.40258e-06	2	1487.7	0.840858	35.7803	0
	High	NQVAmNPTNTVFDAK	4	1	1	P11142	M5(Oxidation)	0	7.38428e+06	0.737696	3	9.13667	0	6.227e-12	74.84	1.16244e-05	2	1665.79	1.11868	34.2125	0
	High	FEELNADLFR	3	1	1	P11142		0	1.67473e+06	0.615916	2	25.2152	0	8.678e-08	67.37	4.22898e-05	2	1253.62	1.74888	46.2804	0
	High	FEELNADLFr	2	1	1	P11142	R10(Arg10)	0	787629	0.641363	1		0	5.792e-07	66.97	4.67616e-05	2	1263.63	0.600945	46.5695	0
	High	SQIHDIVLVGGSTr	4	1	1	P11142	R14(Arg10)	0	1.92856e+06	0.763855	2	11.145	0	1.507e-09	61.88	0.000157132	2	1491.82	1.11535	36.5458	0
	High	IINEPTAAAIAYGLDK	5	1	1	P11142		0	4.25e+06	0.662808	3	3.61039	0	3.426e-14	61.38	0.000214477	2	1659.9	1.40931	46.0211	0
	High	NSLESYAFNmk	3	1	1	P11142	M10(Oxidation); K11(Lys8)	0	2.2818e+06	0.811009	3	5.14324	0	8.425e-05	58.81	0.000281458	2	1327.61	1.25742	35.7296	0
	High	STAGDTHLGGEDFDNR	6	1	1	P11142		0	6.18013e+06	0.920427	2	10.9264	0	5.881e-09	57.34	0.00047749	2	1691.73	0.921632	28.7811	0
	High	VEIIANDQGNR	3	1	1	P11142		0	8.51946e+06	0.769894	3	1.44768	0	6.161e-08	55.87	0.000582995	2	1228.63	0.197128	24.069	0
	High	SINPDEAVAYGAAVQAAILSGDK	2	1	1	P11142		0	835568	0.525513	2	21.9364	0	3.301e-10	50.51	0.00490528	2	2260.15	1.67262	59.9814	0
	High	SQIHDIVLVGGSTR	6	1	1	P11142		0	2.96449e+06	0.766126	4	3.09664	0	1.595e-09	49.57	0.00263157	2	1481.81	0.524783	36.54	0
	High	STAGDTHLGGEDFDNr	5	1	1	P11142	R16(Arg10)	0	4.79043e+06	0.832901	4	6.55388	0	1.139e-06	49.31	0.00304361	2	1701.74	0.863155	28.7871	0
	High	TTPSYVAFTDTEr	2	1	1	P11142	R13(Arg10)	0	4.96204e+06				0	2.454e-05	48.52	0.00412605	2	1497.71	0.611946	35.7888	0
	High	DAGTIAGLNVLR	3	1	1	P11142		0	6.81845e+06	0.694293	1		0	1.248e-09	47.95	0.00269826	2	1199.67	-0.176244	43.8866	0
	High	VEIIANDQGNr	3	1	1	P11142	R11(Arg10)	0	5.87572e+06				0	3.383e-10	45.98	0.0062658	2	1238.64	0.122641	24.0771	0
	High	NSLESYAFNmK	4	1	1	P11142	M10(Oxidation)	0	2.94191e+06				0	8.351e-06	44.23	0.00782707	2	1319.59	0.924474	35.7185	0
	High	NQVAmNPTNTVFDAk	4	1	1	P11142	M5(Oxidation); K15(Lys8)	0	4.61021e+06				0	3.238e-09	41.82	0.0244846	2	1673.81	1.09012	31.9309	0
	High	TVTNAVVTVPAYFNDSQR	5	1	1	P11142		0	4.39484e+06	0.752799	4	2.68345	0	1.738e-05	41.31	0.0342992	3	1982	-0.0996564	44.1978	0
	High	NQVAMNPTNTVFDAk	1	1	1	P11142	K15(Lys8)	0	568104	0.604201	1		0	5.882e-10	39.99	0.0375965	2	1657.81	0.831406	39.0727	0
	High	QTQTFTTYSDNQPGVLIQVYEGER	3	1	1	P11142		0	2.56646e+06	0.673857	2	0.516114	0	1.55e-06	32.54	0.474193	2	2774.32	-0.759345	50.6372	0
	High	TVTNAVVTVPAYFNDSQr	4	1	1	P11142	R18(Arg10)	0	2.8294e+06	0.650754	2	17.7059	0	0.001087	30.69	0.390464	2	1992.01	1.60875	44.5274	0
	High	NQVAMNPTNTVFDAK	2	1	1	P11142		0	1.11757e+06	0.626916	1		0	6.37e-08	29.21	0.433919	2	1649.8	0.119078	39.0427	0
	High	SFYPEEVSSmVLTK	2	1	1	P11142	M10(Oxidation)	0	2.89655e+06	0.679136	2	29.3615	0	4.1e-06	25.84	0.930397	2	1632.78	-0.807641	43.266	0
	High	GPAVGIDLGTTYScVGVFQHGk	2	1	1	P11142	C14(Carbamidomethyl); K22(Lys8)	0	446613	0.639168	1		0	3.397e-07	23.65	2.75547	3	2271.13	-2.04431	48.5153	0
	High	GPAVGIDLGTTYScVGVFQHGK	1	1	1	P11142	C14(Carbamidomethyl)	0	1.16501e+06				0	5.648e-07	14.36	22.2153	3	2263.12	0.797418	48.4457	0
	High	LYQSAGGmPGGmPGGFPGGGAPPSGGASSGPTIEEVD	2	1	1	P11142	M8(Oxidation); M12(Oxidation)	0	9.4486e+06				0	0.0001083	10.7	90.5653	3	3378.49	0.791213	42.6512	0
	High	IINEPTAAAIAYGLDKK	2	1	1	P11142		0	4.11076e+06	0.847265	1		0.002	0.01604	18.9	2.85541	2	1787.99	2.40109	44.8731	1
	High	EIAEAYLGk	2	1	1	P11142	K9(Lys8)	0	962703	0.780451	1		0.003	0.01981	33.9	0.0632458	2	1001.54	0.400569	31.3987	0
	High	SFYPEEVSSmVLTk	1	1	1	P11142	M10(Oxidation); K14(Lys8)	0	1.45829e+06				0.003	0.02227	13.32	16.4212	2	1640.8	1.47893	43.6574	0
	High	NQTAEkEEFEHQQk	1	1	1	P11142	K6(Lys8); K14(Lys8)	0	1.6004e+06				0.003	0.02049	12.55	22.5002	2	1761.84	1.14867	21.0996	1
	High	NQTAEKEEFEHQQK	1	1	1	P11142		0	2.09482e+06	0.848869	1		0.004	0.02779	12.82	19.5376	2	1745.81	0.504495	21.0495	1
	High	EIAEAYLGK	1	1	1	P11142		0	1.45588e+06	0.734722	1		0.005	0.03451	20.76	1.1891	2	993.525	-0.417164	30.5198	0
	High	rFDDAVVQSDmk	1	1	1	P11142	R1(Arg10); M11(Oxidation); K12(Lys8)	0	593852	0.822117	1		0.006	0.04951	10.66	22.5276	2	1444.69	2.07099	26.7651	1
	High	RFDDAVVQSDmK	1	1	1	P11142	M11(Oxidation)	0	921932	0.800457	1		0.007	0.07469	27.49	0.429821	2	1426.66	0.81865	24.1839	1
	High	IINEPTAAAIAYGLDkk	1	1	1	P11142	K16(Lys8); K17(Lys8)	0	2.44487e+06	0.670679	1		0.007	0.07348	16.47	4.33941	3	1804.02	0.0624413	43.3979	1
P68363	Tubulin alpha-1B chain OS=Homo sapiens GN=TUBA1B PE=1 SV=1 - [TBA1B_HUMAN]	1471.67	45.68	1	14	14	85	3.0669e+07	1.10399	44	14.9367	451	50.1196	5.05908
	A2	Sequence	# PSMs	# Proteins	# Protein Groups	Protein Group Accessions	Modifications	ΔCn	Area	Heavy/Light	Heavy/Light Count	Heavy/Light Variability [%]	q-Value	PEP	IonScore	Exp Value	Charge	MH+ [Da]	ΔM [ppm]	RT [min]	# Missed Cleavages
	High	AVcmLSNTTAIAEAWAr	7	1	1	P68363	C3(Carbamidomethyl); M4(Oxidation); R17(Arg10)	0	1.06853e+07	1.22697	4	4.29648	0	1.123e-15	95.13	1.40791e-07	2	1890.91	0.291618	47.9432	0
	High	TIGGGDDSFNTFFSETGAGk	4	1	1	P68363	K20(Lys8)	0	1.44487e+07	1.302	1		0	3.023e-17	90.53	4.06755e-07	2	2015.91	0.754387	49.6311	0
	High	TIGGGDDSFNTFFSETGAGK	4	1	1	P68363		0	1.40207e+07	1.18081	3	1.71687	0	1.769e-15	87.04	8.46341e-07	2	2007.9	1.56708	48.6585	0
	High	AVcmLSNTTAIAEAWAR	8	1	1	P68363	C3(Carbamidomethyl); M4(Oxidation)	0	9.89029e+06	1.18805	2	1.53772	0	1.801e-14	83.07	2.28216e-06	2	1880.9	0.341173	47.9371	0
	High	DYEEVGVDSVEGEGEEEGEEY	4	1	1	P68363		0	4.96362e+07				0	1.474e-16	76.61	5.9403e-06	2	2348.91	2.3401	42.8722	0
	High	AVFVDLEPTVIDEVR	5	1	1	P68363		0	8.66498e+06	0.903404	3	8.39996	0	6.563e-10	65.96	7.96537e-05	2	1701.91	2.11535	52.9049	0
	High	DVNAAIATIK	3	1	1	P68363		0	7.42943e+06	1.08782	3	1.55992	0	2.772e-05	63.4	5.77531e-05	2	1015.58	-0.11688	34.3367	0
	High	AVFVDLEPTVIDEVr	5	1	1	P68363	R15(Arg10)	0	7.00088e+06	0.877191	2	3.43141	0	6.032e-07	61.76	0.000203243	2	1711.92	0.624115	53.8478	0
	High	EIIDLVLDR	3	1	1	P68363		0	2.49222e+06	1.24539	2	9.06165	0	3.545e-08	59.72	0.000161803	2	1085.62	0.452983	49.4362	0
	High	AVcMLSNTTAIAEAWAR	2	1	1	P68363	C3(Carbamidomethyl)	0	1.30292e+06	1.05834	1		0	3.187e-14	56.29	0.00111608	2	1864.91	0.890248	54.0049	0
	High	AVcMLSNTTAIAEAWAr	3	1	1	P68363	C3(Carbamidomethyl); R17(Arg10)	0	1.29212e+06	1.22374	1		0	5.544e-18	53.42	0.00209295	2	1874.91	-0.204375	53.935	0
	High	DVNAAIATIk	3	1	1	P68363	K10(Lys8)	0	7.35066e+06				0	2.103e-06	52.59	0.000618832	2	1023.59	-0.034657	34.3312	0
	High	EIIDLVLDr	1	1	1	P68363	R9(Arg10)	0	2.45552e+06	1.23256	1		0	5.049e-05	48.74	0.0021165	2	1095.63	0.366437	49.2281	0
	High	AYHEQLSVAEITNAcFEPANQmVK	2	1	1	P68363	C15(Carbamidomethyl); M22(Oxidation)	0	3.39959e+06	1.0835	1		0	6.315e-13	38.52	0.12369	3	2766.29	0.286374	46.0533	0
	High	TIGGGDDsFNTFFSETGAGk	4	1	1	P68363	S8(Phospho); K20(Lys8)	0	1.9967e+06	2.42011	3	12.033	0	5.482e-05	34.93	0.107915	2	2095.88	0.65667	50.0292	0
	High	EDAANNYAr	1	1	1	P68363	R9(Arg10)	0	2.02939e+06	1.04879	1		0	0.004042	32.98	0.0517095	2	1033.46	0.356957	17.9605	0
	High	SIQFVDWcPTGFK	1	1	1	P68363	C8(Carbamidomethyl)	0	998657	1.00153	1		0	6.764e-07	31.42	0.235982	2	1584.75	1.10314	52.5751	0
	High	TIGGGDDsFNTFFSETGAGK	1	1	1	P68363	S8(Phospho)	0	957373				0	8.116e-05	31.14	0.22474	2	2087.86	0.210062	50.0538	0
	High	AFVHWYVGEGmEEGEFSEAR	3	1	1	P68363	M11(Oxidation)	0	3.89316e+06	1.09689	2	21.4407	0	8.819e-10	30.7	0.437528	2	2346.02	1.2253	45.9114	0
	High	SIQFVDWcPTGFk	3	1	1	P68363	C8(Carbamidomethyl); K13(Lys8)	0	923817	1.12049	1		0	0.0001666	29.23	0.396285	2	1592.77	1.53304	51.5827	0
	High	AYHEQLSVAEITNAcFEPANQmVk	1	1	1	P68363	C15(Carbamidomethyl); M22(Oxidation); K24(Lys8)	0	3.3151e+06				0	0.0004724	25.63	2.38994	3	2774.31	2.18556	46.0205	0
	High	VGINYQPPTVVPGGDLAk	3	1	1	P68363	K18(Lys8)	0	1.45439e+07	0.676988	1		0	0.0002578	24.39	1.05681	2	1833	-0.282157	44.3262	0
	High	NLDIErPTYTNLNr	3	1	1	P68363	R6(Arg10); R14(Arg10)	0	1.1469e+07	1.0039	3	0.336484	0	2.905e-05	23.56	1.6675	3	1738.9	0.722388	35.6464	0
	High	AFVHWYVGEGmEEGEFSEAr	1	1	1	P68363	M11(Oxidation); R20(Arg10)	0	1.57511e+06				0	3.635e-05	20.77	4.40708	2	2356.02	0.819091	45.9697	0
	High	YmAccLLYr	1	1	1	P68363	M2(Oxidation); C4(Carbamidomethyl); C5(Carbamidomethyl); R9(Arg10)	0	1.98939e+06	1.22824	1		0	0.006852	19.97	1.46358	2	1275.56	-0.0153411	35.519	0
	High	NLDIERPTYTNLNR	3	1	1	P68363		0	8.42603e+06	0.982435	2	7.47854	0	0.003139	16.44	8.72196	2	1718.88	0.80817	37.2573	0
	High	EDAANNYAR	1	1	1	P68363		0	2.13839e+06	1.13636	1		0.006	0.03623	30.59	0.0843727	2	1023.45	0.210122	16.7151	0
	High	FDLmYAk	2	1	1	P68363	M4(Oxidation); K7(Lys8)	0	1.82541e+06	1.1118	2	1.37302	0.006	0.05104	24.58	0.498297	2	911.442	-0.0636291	33.166	0
	High	VGINYQPPTVVPGGDLAK	2	1	1	P68363		0	2.79223e+07	0.682772	2	3.02551	0.006	0.04534	20.98	2.57872	2	1824.99	-0.0614464	42.6547	0
	High	FDLmYAK	1	1	1	P68363	M4(Oxidation)	0	973019				0.007	0.06982	14.56	3.74966	2	903.428	0.3166	34.82	0
P07900	Heat shock protein HSP 90-alpha OS=Homo sapiens GN=HSP90AA1 PE=1 SV=5 - [HS90A_HUMAN]	1422.58	38.25	2	13	22	99	2.27966e+07	0.842599	62	16.9029	732	84.6067	5.021
	A2	Sequence	# PSMs	# Proteins	# Protein Groups	Protein Group Accessions	Modifications	ΔCn	Area	Heavy/Light	Heavy/Light Count	Heavy/Light Variability [%]	q-Value	PEP	IonScore	Exp Value	Charge	MH+ [Da]	ΔM [ppm]	RT [min]	# Missed Cleavages
	High	TLTIVDTGIGmTK	4	2	2	P07900;P08238	M11(Oxidation)	0	4.11011e+06	0.913202	3	15.8529	0	2.374e-12	103.27	1.15743e-08	2	1365.73	1.037	39.8974	0
	High	TLTIVDTGIGmTk	3	2	2	P07900;P08238	M11(Oxidation); K13(Lys8)	0	3.10446e+06	0.943884	1		0	1.031e-11	89.21	2.92378e-07	2	1373.75	1.00267	38.3461	0
	High	NPDDITNEEYGEFYK	3	2	1	P07900		0	3.94201e+06	0.807068	3	8.13227	0	4.259e-12	87.25	5.60762e-07	2	1833.78	1.06419	38.9937	0
	High	NPDDITNEEYGEFYk	3	2	1	P07900	K15(Lys8)	0	2.94431e+06				0	5.709e-11	67.43	5.98626e-05	2	1841.8	1.30358	39.0024	0
	High	ESEDkPEIEDVGsDEEEEkk	3	2	1	P07900	K5(Lys8); S13(Phospho); K19(Lys8); K20(Lys8)	0	2.41756e+07	0.697217	2	5.55958	0	2.921e-10	66.61	0.000113633	3	2425.03	0.66418	26.0113	1
	High	ADLINNLGTIAK	3	3	2	P07900;P08238		0	1.34107e+07	0.901086	2	4.07252	0	1.544e-06	59.55	0.000180185	2	1242.71	0.357909	42.2339	0
	High	DQVANSAFVER	3	2	1	P07900		0	5.27136e+06	0.917708	2	5.37129	0	9.805e-06	58.45	0.000286493	2	1235.6	0.739146	29.7265	0
	High	DQVANSAFVEr	3	2	1	P07900	R11(Arg10)	0	4.03167e+06	0.845252	1		0	1.706e-07	56.28	0.000479135	2	1245.61	0.17072	29.721	0
	High	EDQTEYLEER	3	3	2	P07900;P08238		0	8.84191e+06	0.783838	2	2.87856	0	0.0004713	50.9	0.00133385	2	1311.57	0.397134	28.0982	0
	High	ADLINNLGTIAk	3	3	2	P07900;P08238	K12(Lys8)	0	1.11785e+07	0.854147	1		0	0.0001077	49.35	0.00175611	2	1250.72	0.324558	42.5792	0
	High	ELISNSSDALDk	3	2	1	P07900	K12(Lys8)	0	3.43453e+06	0.899622	3	2.39299	0	0.0001032	48.89	0.00305115	2	1299.65	1.06609	29.2626	0
	High	ELISNSSDALDK	3	2	1	P07900		0	4.15813e+06				0	4.125e-05	45.41	0.00695755	2	1291.64	0.441217	29.2543	0
	High	EDQTEYLEEr	3	3	2	P07900;P08238	R10(Arg10)	0	6.93634e+06	0.871649	1		0	0.001663	42.23	0.0102149	2	1321.58	0.602908	28.1039	0
	High	SLTNDWEDHLAVk	1	3	2	P07900;P08238	K13(Lys8)	0	1.1124e+06	0.939657	1		0	6.604e-06	41.52	0.0235579	2	1535.76	1.61832	41.7775	0
	High	ESEDKPEIEDVGsDEEEEKK	5	2	1	P07900	S13(Phospho)	0	3.87625e+07	0.710831	3	6.23175	0	0.0003375	40.75	0.0323306	3	2400.98	1.02442	25.9578	1
	High	YESLTDPSK	3	3	2	P07900;P08238		0	5.8875e+06	0.742486	3	2.53801	0	2.341e-05	40.62	0.0116173	2	1039.49	-0.187732	25.1205	0
	High	YIDQEELNK	3	3	2	P07900;P08238		0	9.66544e+06	0.855318	2	0.524743	0	0.003597	38.49	0.0265957	2	1151.56	0.510594	26.8796	0
	High	ESEDkPEIEDVGsDEEEEk	6	2	1	P07900	K5(Lys8); S13(Phospho); K19(Lys8)	0	7.84656e+06	0.679353	4	2.77517	0	4.953e-05	35.97	0.0735646	2	2288.92	1.44618	28.234	0
	High	ESEDKPEIEDVGsDEEEEK	5	2	1	P07900	S13(Phospho)	0	1.30672e+07	0.733283	2	0.959939	0	1.345e-08	35.57	0.0689725	2	2272.89	1.92022	29.367	0
	High	TLTIVDTGIGMTK	2	2	2	P07900;P08238		0	358804	0.882631	1		0	1.427e-06	32.6	0.113398	2	1349.74	0.628168	45.0627	0
	High	YIDQEELNk	2	3	2	P07900;P08238	K9(Lys8)	0	4.984e+06	0.797563	1		0	0.001298	31.29	0.13835	2	1159.57	0.368295	26.9514	0
	High	DKEVsDDEAEEKEDKEEEK	3	2	1	P07900	S5(Phospho)	0	6.84012e+06	0.789277	3	8.03286	0	0.007087	24.96	1.14576	3	2360.95	0.752741	19.3954	3
	High	HNDDEQYAWESSAGGSFTVR	2	3	2	P07900;P08238		0	1.46782e+06	1.06779	2	12.3769	0	1.114e-05	23.7	1.89593	2	2255.96	0.811033	41.6057	0
	High	SLTNDWEDHLAVK	4	3	2	P07900;P08238		0	1.43777e+06	0.908096	3	9.17315	0	0.002175	23.06	1.50962	2	1527.75	1.09292	40.2229	0
	High	HIYYITGETK	1	2	1	P07900		0	2.08744e+06	0.879345	1		0	4.268e-05	20.39	2.11754	2	1224.63	0.374867	30.0647	0
	High	HIYYITGETk	2	2	1	P07900	K10(Lys8)	0	2.5471e+06	1.04774	1		0	1.121e-05	19.75	2.59358	2	1232.64	0.439949	30.0701	0
	High	LGLGIDEDDPTADDTSAAVTEEmPPLEGDDDTSR	1	2	1	P07900	M23(Oxidation)	0	3.7248e+06	0.470806	1		0	0.0006957	15.35	33.0851	3	3563.54	2.52714	45.9472	0
	High	LGIHEDSQNr	2	2	1	P07900	R10(Arg10)	0	1.19361e+06	0.878159	1		0	0.001721	13.81	7.75049	3	1178.58	0.0693987	20.4	0
	High	LVTSPccIVTSTYGWTANmER	1	2	1	P07900	C6(Carbamidomethyl); C7(Carbamidomethyl); M19(Oxidation)	0	1.10687e+06	0.822362	1		0	3.988e-07	11.66	47.0234	3	2462.12	0.169081	49.86	0
	High	HNDDEQYAWESSAGGSFTVr	1	3	2	P07900;P08238	R20(Arg10)	0	806152				0	0.003145	11.63	32.5258	2	2265.97	2.00664	41.6878	0
	High	EGLELPEDEEEk	3	3	2	P07900;P08238	K12(Lys8)	0	3.05576e+06	0.66308	3	3.04566	0.001	0.01487	28.5	0.349815	2	1424.65	0.916392	33.0921	0
	High	YYTSASGDEmVSLK	1	2	1	P07900	M10(Oxidation)	0	1.00152e+06				0.001	0.01144	14.61	9.23312	2	1566.7	0.779187	30.789	0
	High	ESEDKPEIEDVGsDEEEEKKDGDK	1	2	1	P07900	S13(Phospho)	0	1.62167e+07	0.732583	1		0.004	0.02547	31.71	0.356421	3	2816.16	1.48348	25.3258	2
	High	YYTSASGDEmVSLk	1	2	1	P07900	M10(Oxidation); K14(Lys8)	0	911488	1.01123	1		0.004	0.02815	20.03	2.88053	2	1574.72	1.13815	30.783	0
	High	FYEQFSK	3	2	1	P07900		0	2.49628e+06	0.99461	3	7.86387	0.006	0.0409	31.91	0.0821316	2	948.446	-0.157958	28.0058	0
	High	YESLTDPSKLDSGK	1	3	2	P07900;P08238		0	1.25678e+06	0.736505	1		0.006	0.03644	26.49	0.697174	2	1539.75	0.765779	29.4832	1
	High	LGIHEDSQNR	1	2	1	P07900		0	1.50457e+06	0.881471	1		0.006	0.05558	20.52	2.40197	2	1168.57	0.0281877	20.289	0
	High	EGLELPEDEEEK	2	3	2	P07900;P08238		0	5.12048e+06				0.006	0.04235	18.09	3.27088	2	1416.64	0.259644	33.0658	0
	High	YESLTDPSkLDSGk	1	3	2	P07900;P08238	K9(Lys8); K14(Lys8)	0	794875	0.763592	1		0.006	0.05611	15.11	10.2007	2	1555.78	1.33565	31.8099	1
	High	YESLTDPSk	1	3	2	P07900;P08238	K9(Lys8)	0	3.81986e+06				0.007	0.07204	19.77	1.52253	2	1047.51	-0.106844	22.7773	0
P07437	Tubulin beta chain OS=Homo sapiens GN=TUBB PE=1 SV=2 - [TBB5_HUMAN]	1314.78	57.21	1	4	16	96	1.35854e+07	1.06269	47	22.2132	444	49.639	4.89404
	A2	Sequence	# PSMs	# Proteins	# Protein Groups	Protein Group Accessions	Modifications	ΔCn	Area	Heavy/Light	Heavy/Light Count	Heavy/Light Variability [%]	q-Value	PEP	IonScore	Exp Value	Charge	MH+ [Da]	ΔM [ppm]	RT [min]	# Missed Cleavages
	High	mAVTFIGNSTAIQELFk	4	1	1	P07437	M1(Oxidation); K17(Lys8)	0	4.26849e+06	1.18254	2	19.1084	0	1.313e-13	80.57	3.56325e-06	2	1893.99	0.646017	58.4074	0
	High	EIVHIQAGQcGNQIGAk	7	1	2	P07437;P68371	C10(Carbamidomethyl); K17(Lys8)	0	1.66755e+07	1.15182	2	10.0305	0	7.04e-12	76.76	9.0787e-06	2	1830.94	1.16458	29.6409	0
	High	mAVTFIGNSTAIQELFK	5	1	1	P07437	M1(Oxidation)	0	4.5571e+06	0.4837	1		0	4.449e-12	76.7	8.61492e-06	2	1885.97	0.928259	58.3785	0
	High	ISEQFTAmFR	2	2	2	P68371;P07437	M8(Oxidation)	0	1.80235e+06	1.30635	2	0.468483	0	3.663e-06	71.24	1.45852e-05	2	1245.59	-0.381556	39.1787	0
	High	YLTVAAVFr	2	2	2	P68371;P07437	R9(Arg10)	0	1.29523e+06	1.48962	2	14.642	0	1.511e-06	61.44	9.70099e-05	2	1049.6	-0.530118	46.1687	0
	High	EIVHIQAGQcGNQIGAK	7	1	2	P07437;P68371	C10(Carbamidomethyl)	0	1.56822e+07	1.17012	4	0.777177	0	3.569e-10	60.94	0.000357065	2	1822.92	0.789229	32.0707	0
	High	ISVYYNEATGGK	3	1	1	P07437		0	1.1201e+07	1.20326	1		0	4.978e-06	59.02	0.000304764	2	1301.64	0.479151	32.0592	0
	High	ISVYYNEATGGk	3	1	1	P07437	K12(Lys8)	0	11838395	1.18724	2	0.135341	0	1.155e-08	58.11	0.00037681	2	1309.65	0.632976	30.631	0
	High	ImNTFSVVPSPK	3	2	2	P68371;P07437	M2(Oxidation)	0	1.22422e+07	0.816279	1		0	3.285e-06	57.94	0.000371846	2	1335.7	0.666091	36.1531	0
	High	ImNTFSVVPSPk	4	2	2	P68371;P07437	M2(Oxidation); K12(Lys8)	0	8.99375e+06	0.80729	2	9.64508	0	2.152e-08	57.5	0.000426254	2	1343.71	0.633211	38.3399	0
	High	LAVNmVPFPR	2	2	2	P68371;P07437	M5(Oxidation)	0	5.64022e+06	0.850795	1		0	3.768e-06	53.74	0.000883166	2	1159.63	-0.505845	39.6536	0
	High	EVDEQmLNVQNk	3	2	2	P68371;P07437	M6(Oxidation); K12(Lys8)	0	7.22191e+06	1.12574	2	1.08197	0	0.000166	49.88	0.00301826	2	1470.7	1.18149	25.7906	0
	High	LAVNmVPFPr	3	2	2	P68371;P07437	M5(Oxidation); R10(Arg10)	0	4.27424e+06	0.71503	2	27.1289	0	6.785e-06	49.73	0.00202506	2	1169.64	-0.161246	39.6365	0
	High	ISEQFTAmFr	2	2	2	P68371;P07437	M8(Oxidation); R10(Arg10)	0	2.01361e+06				0	1.262e-05	49.06	0.00267328	2	1255.6	0.813443	39.1732	0
	High	EAEScDcLQGFQLTHSLGGGTGSGmGTLLISK	1	2	2	P68371;P07437	C5(Carbamidomethyl); C7(Carbamidomethyl); M25(Oxidation)	0	2.91301e+06	1.18728	1		0	1.188e-09	41.33	0.0832982	3	3327.54	2.52633	49.899	0
	High	EVDEQmLNVQNK	3	2	2	P68371;P07437	M6(Oxidation)	0	7.23186e+06	1.10958	1		0	1.615e-06	40.75	0.0229154	2	1462.69	1.0476	24.4116	0
	High	EVDEQMLNVQNK	3	2	2	P68371;P07437		0	3.03724e+06	1.09243	2	4.09294	0	0.0001604	40.49	0.0261739	2	1446.69	0.835048	30.9825	0
	High	EVDEQMLNVQNk	3	2	2	P68371;P07437	K12(Lys8)	0	2.92696e+06	1.21312	1		0	7.912e-05	39.87	0.0318647	2	1454.7	0.384175	31.8947	0
	High	AILVDLEPGTMDSVR	1	1	1	P07437		0	699572	0.893847	1		0	7.981e-07	35.91	0.0893594	2	1615.84	-0.135083	48.5422	0
	High	YLTVAAVFR	1	2	2	P68371;P07437		0	709142	1.53579	1		0	0.002898	35.57	0.046148	2	1039.6	1.66521	47.7287	0
	High	IMNTFSVVPSPK	1	2	2	P68371;P07437		0	980002	0.821717	1		0	0.0004104	32.36	0.136509	2	1319.7	-1.699	42.3606	0
	High	SGPFGQIFrPDNFVFGQSGAGNNWAk	2	2	2	P68371;P07437	R9(Arg10); K26(Lys8)	0	1.29975e+06	0.989713	1		0	1.676e-10	32.12	0.520286	3	2816.37	0.224403	57.3835	0
	High	SGPFGQIFRPDNFVFGQSGAGNNWAK	3	2	2	P68371;P07437		0	1.51811e+06				0	6.756e-12	30.63	0.745732	3	2798.35	0.795462	57.4414	0
	High	AILVDLEPGTmDSVr	4	1	1	P07437	M11(Oxidation); R15(Arg10)	0	8.56713e+06	0.852693	1		0	6.992e-06	29.78	0.355721	2	1641.84	1.05046	42.4392	0
	High	NSSYFVEWIPNNVK	5	2	2	P68371;P07437		0	2.39188e+06	1.03916	1		0	0.007128	29.77	0.401669	2	1696.84	2.33397	50.8769	0
	High	FPGQLNADLR	2	2	2	P68371;P07437		0	6.72037e+06	0.419198	1		0	0.0005445	28.99	0.250725	2	1130.6	0.68604	36.3467	0
	High	ALTVPELTQQVFDAK	2	1	1	P07437		0	7.86122e+06	0.928938	2	3.27854	0	3.029e-05	28.61	0.409926	2	1659.9	1.48285	53.8224	0
	High	AILVDLEPGTmDSVR	3	1	1	P07437	M11(Oxidation)	0	1.10996e+07	0.938612	2	4.41827	0	0.001656	26.92	0.688156	2	1631.83	1.56106	44.0984	0
	High	NSSYFVEWIPNNVk	3	2	2	P68371;P07437	K14(Lys8)	0	1.9445e+06	0.906834	2	3.42648	0	2.648e-05	26.71	0.878068	2	1704.85	0.58177	51.7891	0
	High	FPGQLNADLr	2	2	2	P68371;P07437	R10(Arg10)	0	1.95988e+06	0.631119	1		0	3.973e-05	23.92	0.766208	2	1140.6	-0.148296	38.0491	0
	High	EAEScDcLQGFQLTHSLGGGTGSGmGTLLISk	1	2	2	P68371;P07437	C5(Carbamidomethyl); C7(Carbamidomethyl); M25(Oxidation); K32(Lys8)	0	3.1127e+06				0	8.994e-05	17.82	18.44	3	3335.54	-1.33404	49.8353	0
	High	LTTPTYGDLNHLVSATmSGVTTcLR	1	2	2	P68371;P07437	M17(Oxidation); C23(Carbamidomethyl)	0	1.02514e+06	1.06274	1		0	7.501e-06	16.4	17.6569	3	2724.34	1.61114	53.1218	0
	High	ALTVPELTQQVFDAk	2	1	1	P07437	K15(Lys8)	0	4.4235e+06	0.938533	1		0	0.003002	11.66	19.5729	2	1667.91	-0.377254	53.289	0
	High	LTTPTYGDLNHLVSATmSGVTTcLr	1	2	2	P68371;P07437	M17(Oxidation); C23(Carbamidomethyl); R25(Arg10)	0	1.01107e+06				0	0.001579	10.02	75.5314	3	2734.35	3.31331	53.128	0
	High	GHYTEGAELVDSVLDVVR	1	2	2	P68371;P07437		0	298139	1.24167	1		0.003	0.02288	12.82	23.9754	2	1958.99	2.79276	58.7333	0
	High	ISEQFTAMFR	1	2	2	P68371;P07437		0	285295	0.0277546	1		0.006	0.04308	26.16	0.527542	2	1229.6	1.03747	46.652	0
P60709	Actin, cytoplasmic 1 OS=Homo sapiens GN=ACTB PE=1 SV=1 - [ACTB_HUMAN]	1200.35	52	2	15	15	94	3.54319e+07	0.848184	53	19.7688	375	41.7097	5.47803
	A2	Sequence	# PSMs	# Proteins	# Protein Groups	Protein Group Accessions	Modifications	ΔCn	Area	Heavy/Light	Heavy/Light Count	Heavy/Light Variability [%]	q-Value	PEP	IonScore	Exp Value	Charge	MH+ [Da]	ΔM [ppm]	RT [min]	# Missed Cleavages
	High	DLYANTVLSGGTTmYPGIADr	8	2	1	P60709	M14(Oxidation); R21(Arg10)	0	6.83034e+06	0.869674	3	4.88102	0	7.346e-19	103.05	3.1305e-08	2	2241.08	1.22264	47.1972	0
	High	DLYANTVLSGGTTmYPGIADR	6	2	1	P60709	M14(Oxidation)	0	8.34439e+06	0.909505	3	8.90314	0	5.798e-15	93.87	2.50019e-07	2	2231.07	0.995026	47.1908	0
	High	AGFAGDDAPr	3	2	1	P60709	R10(Arg10)	0	1.40457e+07	0.800086	2	1.28166	0	8.846e-09	66.2	2.43961e-05	2	986.456	-0.339506	21.5348	0
	High	GYSFTTTAER	3	2	1	P60709		0	2.78978e+07	1.07324	1		0	5.769e-06	64.71	5.13859e-05	2	1132.53	0.379725	27.9109	0
	High	GYSFTTTAEr	3	2	1	P60709	R10(Arg10)	0	2.68949e+07	1.05596	2	2.02131	0	9.529e-06	64.17	5.97398e-05	2	1142.54	0.404215	29.0175	0
	High	VAPEEHPVLLTEAPLNPK	6	2	1	P60709		0	5.87892e+07	0.512408	5	0.286886	0	1.273e-11	61.25	0.000212295	2	1954.07	0.936753	41.9805	0
	High	AGFAGDDAPR	3	2	1	P60709		0	1.96088e+07	0.802503	1		0	5.939e-08	55.09	0.000338703	2	976.448	-0.188012	22.6589	0
	High	QEYDESGPSIVHr	6	2	1	P60709	R13(Arg10)	0	8.02122e+06	0.822021	5	3.64863	0	1.491e-07	54.55	0.000988594	2	1526.71	0.72275	28.5103	0
	High	SYELPDGQVITIGNEr	3	2	1	P60709	R16(Arg10)	0	1.01945e+07	0.822013	2	7.03116	0	4.749e-08	53.41	0.00201409	2	1800.9	-0.917948	46.176	0
	High	QEYDESGPSIVHR	6	2	1	P60709		0	1.10972e+07	0.746445	1		0	0.0002611	51.53	0.00193169	2	1516.7	0.867533	26.0731	0
	High	LcYVALDFEQEmATAASSSSLEK	3	2	1	P60709	C2(Carbamidomethyl); M12(Oxidation)	0	1.82088e+06	0.912442	2	5.81116	0	6.955e-09	40.35	0.0704891	2	2566.18	3.00095	49.7248	0
	High	VAPEEHPVLLTEAPLNPk	4	2	1	P60709	K18(Lys8)	0	8.25789e+06	0.509617	1		0	5.532e-07	40.03	0.0256224	2	1962.08	0.664271	40.0249	0
	High	DLTDYLmk	1	2	1	P60709	M7(Oxidation); K8(Lys8)	0	5.81064e+06	0.958934	1		0	0.006529	34.48	0.0492259	2	1022.5	-0.0551329	38.6789	0
	High	KDLYANTVLSGGTTmYPGIADR	3	2	1	P60709	M15(Oxidation)	0	2.05551e+06	0.698184	2	0.914711	0	0.0001189	33.32	0.313898	3	2359.16	0.46991	41.6895	1
	High	LcYVALDFEQEmATAASSSSLEk	2	2	1	P60709	C2(Carbamidomethyl); M12(Oxidation); K23(Lys8)	0	1.55502e+06				0	1.81e-07	32.44	0.447493	2	2574.19	2.69199	49.7827	0
	High	LcYVALDFEQEMATAASSSSLEK	3	2	1	P60709	C2(Carbamidomethyl)	0	656902	0.555553	2	155.796	0	2.516e-08	32.27	0.439328	2	2550.18	2.46182	59.2801	0
	High	AVFPSIVGRPR	3	2	1	P60709		0	7.05068e+06	0.716152	2	4.73698	0	0.001457	31.35	0.0953771	2	1198.71	0.137461	38.9094	0
	High	DSYVGDEAQSk	3	2	1	P60709	K11(Lys8)	0	1.26386e+07	0.996047	3	9.94904	0	2.182e-06	30.32	0.147799	2	1206.54	0.156143	21.0268	0
	High	SYELPDGQVITIGNER	3	2	1	P60709		0	1.92537e+07	0.898975	2	10.9901	0	2.668e-05	29.25	0.517177	3	1790.89	1.40325	46.6465	0
	High	kDLYANTVLSGGTTmYPGIADr	2	2	1	P60709	K1(Lys8); M15(Oxidation); R22(Arg10)	0	1.28366e+06	0.841453	1		0	0.0004407	21.6	4.35473	3	2377.18	0.103921	43.0321	1
	High	DLYANTVLSGGTTMYPGIADr	1	2	1	P60709	R21(Arg10)	0	0				0	3.234e-06	21.2	4.78587	2	2225.08	1.36001	50.663	0
	High	DSYVGDEAQSK	3	2	1	P60709		0	1.31858e+07				0	0.001871	19.52	1.51838	2	1198.52	0.291448	20.8962	0
	High	TTGIVmDSGDGVTHTVPIYEGYALPHAILR	1	2	1	P60709	M6(Oxidation)	0	1.26047e+06	0.434187	1		0	0.0002115	15.51	21.1511	3	3199.61	0.836778	51.7563	0
	High	AVFPSIVGrPr	2	2	1	P60709	R9(Arg10); R11(Arg10)	0	3.99989e+06	0.677297	1		0.001	0.01271	28.77	0.149531	2	1218.72	0.187358	38.9761	0
	High	DLTDYLmK	2	2	1	P60709	M7(Oxidation)	0	6.73275e+06	0.975829	1		0.001	0.01105	27.21	0.24752	2	1014.48	0.403868	38.668	0
	High	EITALAPSTmk	3	2	1	P60709	M10(Oxidation); K11(Lys8)	0	1.30423e+07	0.84719	1		0.002	0.01944	15.5	5.4268	2	1185.63	0.347484	27.1772	0
	High	EITALAPSTmK	2	2	1	P60709	M10(Oxidation)	0	1.70218e+07	0.849763	2	0.275807	0.003	0.02082	19.96	1.82322	2	1177.61	0.382833	27.1691	0
	High	EITALAPSTMK	3	2	1	P60709		0	3.82669e+06	0.90251	3	12.2176	0.004	0.02721	28.48	0.307013	2	1161.62	0.00387552	35.1126	0
	High	HQGVmVGmGQk	1	2	1	P60709	M5(Oxidation); M8(Oxidation); K11(Lys8)	0	3.17198e+06	1.03045	1		0.004	0.02685	20.16	1.77778	2	1211.58	0.068185	16.2412	0
	High	HQGVmVGmGQK	1	2	1	P60709	M5(Oxidation); M8(Oxidation)	0	1.07695e+06	1.15979	1		0.007	0.07734	12.5	9.38267	3	1203.56	0.191165	17.8199	0
	High	DSYVGDEAQSKR	1	2	1	P60709		0	623493	1.15137	1		0.009	0.09289	14.77	6.68353	2	1354.62	0.494407	20.5084	1
P04264	Keratin, type II cytoskeletal 1 OS=Homo sapiens GN=KRT1 PE=1 SV=6 - [K2C1_HUMAN]	968.195	32.14	1	14	16	49	7.81502e+07	0.01	48	0	644	65.999	8.11865
	A2	Sequence	# PSMs	# Proteins	# Protein Groups	Protein Group Accessions	Modifications	ΔCn	Area	Heavy/Light	Heavy/Light Count	Heavy/Light Variability [%]	q-Value	PEP	IonScore	Exp Value	Charge	MH+ [Da]	ΔM [ppm]	RT [min]	# Missed Cleavages
	High	GGGGGGYGSGGSSYGSGGGSYGSGGGGGGGR	6	1	1	P04264		0	5.75909e+06	0.01	6	0	0	3.691e-17	93.92	1.38907e-07	2	2383.95	0.4015	24.5	0
	High	SGGGFSSGSAGIINYQR	5	1	1	P04264		0	1.56272e+07	0.01	5	0	0	4.789e-10	84.94	1.20588e-06	2	1657.8	1.88612	36.2257	0
	High	FLEQQNQVLQTK	3	2	2	P04264;P35908		0	4.63717e+06	0.01	3	0	0	5.206e-11	79.24	3.23958e-06	2	1475.79	0.664853	34.3455	0
	High	SLVNLGGSKSISISVAR	4	1	1	P04264		0	4.02199e+06	0.01	3	0	0	1.41e-10	74.91	4.74427e-06	2	1687.97	0.90996	43.3989	1
	High	GSYGSGGSSYGSGGGSYGSGGGGGGHGSYGSGSSSGGYR	2	1	1	P04264		0	1.51275e+06	0.0185317	2	22.784	0	8.395e-12	60.29	0.000547633	3	3312.32	2.45993	27.0861	0
	High	YEELQITAGR	3	2	2	P04259;P04264		0	1.52657e+06	0.01	3	0	0	6.697e-05	55.13	0.00062608	2	1179.6	0.551472	32.1325	0
	High	TNAENEFVTIKK	4	1	1	P04264		0	2.70542e+06	0.01	4	0	0	0.0001204	49.12	0.00322013	2	1393.73	0.6964	31.49	1
	High	SLVNLGGSK	2	1	1	P04264		0	1.26855e+08	0.01	2	0	0	0.001933	48.25	0.00154561	2	874.5	0.504429	31.1567	0
	High	SGYRSGGGFSSGSAGIINYQR	6	1	1	P04264		0	9.15743e+06	0.01	6	0	0	2.914e-08	32.91	0.290226	2	2121.01	0.302171	36.9803	1
	High	QISNLQQSISDAEQR	2	1	1	P04264		0	1.17309e+06	0.0116385	2	22.7835	0	6.654e-07	31.1	0.316748	2	1716.85	0.036455	38.508	0
	High	TNAENEFVTIK	2	1	1	P04264		0	851047	0.01	2	0	0	7.123e-05	28.27	0.377404	2	1265.64	0.380529	36.0326	0
	High	GGSGGGGGGSSGGRGSGGGSSGGSIGGR	1	1	1	P04264		0	3.09704e+06	0.01	1		0	1.346e-05	22.27	2.6907	3	2079.92	1.11885	15.0968	1
	High	SISISVAR	3	1	1	P04264		0	9.19688e+07	0.01	3	0	0.001	0.01539	46.04	0.00241419	2	832.489	0.249733	29.7552	0
	High	SLNNQFASFIDK	2	1	1	P04264		0	554219	0.0209216	2	68.9549	0.001	0.01051	19.08	3.44459	2	1383.69	1.14247	45.5647	0
	High	SGGGFSSGSAGIINYQRR	2	1	1	P04264		0	3.1485e+06	0.01	2	0	0.003	0.02362	23.59	1.87609	3	1813.9	1.08548	35.4738	1
	High	TLLEGEESR	2	1	1	P04264		0	6.81736e+06	0.01	2	0	0.006	0.04267	29.17	0.217544	2	1033.52	-0.395448	23.9639	0
P06733	Alpha-enolase OS=Homo sapiens GN=ENO1 PE=1 SV=2 - [ENOA_HUMAN]	965.72	41.01	1	13	13	77	1.31972e+07	0.783194	41	14.0963	434	47.1393	7.38623
	A2	Sequence	# PSMs	# Proteins	# Protein Groups	Protein Group Accessions	Modifications	ΔCn	Area	Heavy/Light	Heavy/Light Count	Heavy/Light Variability [%]	q-Value	PEP	IonScore	Exp Value	Charge	MH+ [Da]	ΔM [ppm]	RT [min]	# Missed Cleavages
	High	GNPTVEVDLFTSK	3	1	1	P06733		0	6.373e+06	0.748291	3	7.01533	0	1.206e-09	70.12	2.80832e-05	2	1406.72	1.20266	43.0709	0
	High	AAVPSGASTGIYEALELr	5	1	1	P06733	R18(Arg10)	0	3.83211e+06	0.74237	3	9.25541	0	3.124e-14	68.21	5.3487e-05	2	1814.96	1.82027	49.7143	0
	High	FTASAGIQVVGDDLTVTNPk	3	1	1	P06733	K20(Lys8)	0	6.11193e+06	0.861079	2	6.41462	0	7.94e-11	66.2	9.68409e-05	2	2041.07	1.43594	47.5951	0
	High	DATNVGDEGGFAPNILENK	6	1	1	P06733		0	1.59779e+07	0.767518	3	2.99824	0	1.528e-12	62.36	0.000298774	2	1960.93	0.596463	43.3951	0
	High	DATNVGDEGGFAPNILENk	5	1	1	P06733	K19(Lys8)	0	1.07932e+07	0.735891	3	3.98351	0	1.099e-10	62.05	0.000320943	2	1968.94	0.326315	43.404	0
	High	FTASAGIQVVGDDLTVTNPK	3	1	1	P06733		0	8.235e+06	0.716544	2	0.840746	0	1.11e-11	61.42	0.000306939	2	2033.06	1.4607	47.5889	0
	High	LAmQEFmILPVGAANFR	5	1	1	P06733	M3(Oxidation); M7(Oxidation)	0	3.00889e+06	0.852883	3	5.18735	0	4.759e-10	60.99	0.000354171	2	1939.98	0.380124	53.0728	0
	High	AAVPSGASTGIYEALELR	6	1	1	P06733		0	5.36114e+06	0.758882	2	0.809711	0	9.668e-16	55.4	0.00104041	2	1804.94	0.527766	50.7601	0
	High	VVIGmDVAASEFFR	4	1	1	P06733	M5(Oxidation)	0	2.63579e+06	0.844054	2	6.06356	0	9.89e-10	48.3	0.00486331	2	1556.78	0.498306	49.5293	0
	High	GNPTVEVDLFTSk	3	1	1	P06733	K13(Lys8)	0	4.45647e+06				0	7.687e-07	48.22	0.0041394	2	1414.73	0.736968	44.4748	0
	High	YISPDQLADLYK	3	1	1	P06733		0	1.53787e+07	0.734882	1		0	4.782e-05	46.05	0.00703223	2	1425.73	0.299306	47.967	0
	High	IGAEVYHNLK	4	1	1	P06733		0	6.70246e+06	0.90728	4	5.20726	0	1.135e-06	45.88	0.0047165	2	1143.62	0.0428072	29.256	0
	High	IGAEVYHNLk	5	1	1	P06733	K10(Lys8)	0	6.35378e+06	0.896017	2	6.68391	0	0.0004001	44.57	0.00612567	3	1151.63	0.235599	26.4389	0
	High	DYPVVSIEDPFDQDDWGAWQK	4	1	1	P06733		0	825781	0.4861	1		0	2.946e-09	44.32	0.0255829	2	2510.12	1.17607	60.3292	0
	High	YISPDQLADLYk	3	1	1	P06733	K12(Lys8)	0	9.72165e+06	0.716775	2	1.70973	0	1.795e-05	44.25	0.0109049	2	1433.74	0.440823	46.6387	0
	High	DYPVVSIEDPFDQDDWGAWQk	1	1	1	P06733	K21(Lys8)	0	248105				0	1.028e-07	38.31	0.104746	2	2518.14	5.22891	60.2829	0
	High	LAmQEFmILPVGAANFr	5	1	1	P06733	M3(Oxidation); M7(Oxidation); R17(Arg10)	0	2.33269e+06	0.717402	2	1.50938	0	8.854e-09	36.42	0.103379	2	1949.99	0.33187	53.1157	0
	High	VVIGmDVAASEFFr	3	1	1	P06733	M5(Oxidation); R14(Arg10)	0	2.08578e+06	0.937143	1		0	4.159e-06	35.74	0.0924333	2	1566.79	1.45034	48.4764	0
	High	LNVTEQEk	2	1	1	P06733	K8(Lys8)	0	921767	0.926878	2	0.292503	0.002	0.01682	20.39	1.3858	2	968.514	-0.239399	19.2833	0
	High	DATNVGDEGGFAPNILENkEGLELLk	1	1	1	P06733	K19(Lys8); K26(Lys8)	0	135424	0.672432	1		0.004	0.02684	21.02	4.98918	3	2759.41	0.548361	54.4757	1
	High	DATNVGDEGGFAPNILENKEGLELLK	1	1	1	P06733		0	399010				0.004	0.02589	19.4	8.3643	3	2743.37	-1.55594	54.4635	1
	High	LmIEMDGTENK	1	1	1	P06733	M2(Oxidation)	0	654281	1.03284	1		0.006	0.05419	12.21	11.8191	2	1296.58	1.41683	30.4226	0
	High	ScNcLLLK	1	1	1	P06733	C2(Carbamidomethyl); C4(Carbamidomethyl)	0	1.63863e+06	0.891059	1		0.009	0.08573	13.39	6.01311	2	1007.5	0.948449	32.8999	0
P35908	Keratin, type II cytoskeletal 2 epidermal OS=Homo sapiens GN=KRT2 PE=1 SV=2 - [K22E_HUMAN]	904.922	35.37	1	14	16	47	2.58429e+07	0.01	45	0	639	65.3932	8.00146
	A2	Sequence	# PSMs	# Proteins	# Protein Groups	Protein Group Accessions	Modifications	ΔCn	Area	Heavy/Light	Heavy/Light Count	Heavy/Light Variability [%]	q-Value	PEP	IonScore	Exp Value	Charge	MH+ [Da]	ΔM [ppm]	RT [min]	# Missed Cleavages
	High	GGGFGGGSSFGGGSGFSGGGFGGGGFGGGR	5	1	1	P35908		0	7.39457e+06	0.0135501	4	47.4273	0	3.42e-23	108.05	7.88232e-09	2	2399.02	0.212282	47.3946	0
	High	GFSSGSAVVSGGSR	3	1	1	P35908		0	3.97675e+07	0.01	3	0	0	3.167e-13	103.17	9.96427e-09	2	1254.61	0.759333	26.9459	0
	High	FLEQQNQVLQTK	3	2	2	P04264;P35908		0	4.63717e+06	0.01	3	0	0	5.206e-11	79.24	3.23958e-06	2	1475.79	0.664853	34.3455	0
	High	AAFGGSGGRGSSSGGGYSSGSSSYGSGGR	5	1	1	P35908		0	1.41608e+07	0.01	5	0	0	1.733e-20	75.38	1.61078e-05	3	2501.07	0.550726	23.4624	1
	High	HGGGGGGFGGGGFGSR	6	1	1	P35908		0	1.84526e+07	0.01	6	0	0	4.552e-14	63.88	6.6955e-05	2	1320.58	0.201564	27.4951	0
	High	GSSSGGGYSSGSSSYGSGGR	3	1	1	P35908		0	6.36558e+06	0.01	3	0	0	6.947e-13	62	0.000119535	2	1740.71	0.901713	17.8815	0
	High	SISISVAGGGGGFGAAGGFGGR	2	1	1	P35908		0	2.06078e+06	0.01	1		0	1.997e-13	54.25	0.00166834	2	1838.91	0.246499	46.4146	0
	High	GGSGGGGSISGGGYGSGGGSGGR	3	1	1	P35908		0	2.82517e+06	0.01	3	0	0	5.22e-08	50.12	0.00253741	2	1741.75	1.55993	21.0382	0
	High	YGSGGGSKGGSISGGGYGSGGGK	4	1	1	P35908		0	3.43188e+06	0.01	4	0	0	8.079e-10	46.67	0.00843998	2	1890.86	0.883883	21.6336	1
	High	STSSFScLSR	2	1	1	P35908	C7(Carbamidomethyl)	0	1.45693e+06	0.01	2	0	0	0.0001344	40.58	0.0120179	2	1131.51	0.863055	29.3986	0
	High	GGGGGGFRGFSSGSAVVSGGSR	5	1	1	P35908		0	3.86634e+06	0.01	5	0	0	5.656e-08	32.08	0.300677	3	1899.91	1.09412	33.2011	1
	High	GFSSGSAVVSGGSRR	2	1	1	P35908		0	1.0417e+07	0.01	2	0	0	0.003166	27.69	0.4852	3	1410.71	0.00597467	22.5497	1
	High	SLVGLGGTK	1	1	1	P35908		0	1.93087e+07	0.0113839	1		0	0.006501	27.44	0.180572	2	831.493	-0.042692	30.4501	0
	High	TAAENDFVTLKK	1	1	1	P35908		0	817509	0.01	1		0	0.008622	27.17	0.445899	2	1336.71	0.799193	31.7861	1
	High	GGSISGGGYGSGGGKHSSGGGSR	1	1	1	P35908		0	438116	0.0228163	1		0	9.576e-05	23.37	1.91191	2	1922.87	1.07475	18.3923	1
	High	AQYEEIAQR	1	3	3	P02538;P04259;P35908		0	1.17572e+06	0.01	1		0.004	0.02608	39.19	0.0193529	2	1107.54	0.0587325	23.3999	0
P14618	Pyruvate kinase PKM OS=Homo sapiens GN=PKM PE=1 SV=4 - [KPYM_HUMAN]	875.977	38.42	1	15	15	73	6.73307e+06	0.688263	42	20.3396	531	57.9	7.84033
	A2	Sequence	# PSMs	# Proteins	# Protein Groups	Protein Group Accessions	Modifications	ΔCn	Area	Heavy/Light	Heavy/Light Count	Heavy/Light Variability [%]	q-Value	PEP	IonScore	Exp Value	Charge	MH+ [Da]	ΔM [ppm]	RT [min]	# Missed Cleavages
	High	LDIDSPPITAR	3	1	1	P14618		0	9.72499e+06	0.650432	3	7.01766	0	1.355e-08	71.17	1.63614e-05	2	1197.65	0.158065	35.9637	0
	High	NTGIIcTIGPASR	3	1	1	P14618	C6(Carbamidomethyl)	0	4.79041e+06	0.751494	3	11.698	0	2.464e-06	65.48	7.71696e-05	2	1359.71	0.918622	36.6729	0
	High	IYVDDGLISLQVK	1	1	1	P14618		0	538957	0.765487	1		0	1.101e-10	63.62	8.92049e-05	2	1462.82	1.0861	50.0923	0
	High	LDIDSPPITAr	4	1	1	P14618	R11(Arg10)	0	5.79719e+06				0	3.65e-09	62.9	0.000104188	2	1207.66	0.0819915	35.9899	0
	High	GADFLVTEVENGGSLGSk	4	1	1	P14618	K18(Lys8)	0	1.24266e+06	0.802642	1		0	1.457e-10	58.39	0.000595011	2	1787.9	2.97842	47.3827	0
	High	GVNLPGAAVDLPAVSEK	3	1	1	P14618		0	5.6838e+06	0.577142	2	4.76271	0	5.602e-13	56.97	0.000582034	2	1636.89	0.590015	44.7745	0
	High	GADFLVTEVENGGSLGSK	4	1	1	P14618		0	1.68594e+06	0.85877	2	4.04792	0	2.415e-13	51.51	0.00292839	2	1779.88	1.71058	48.4009	0
	High	NTGIIcTIGPASr	3	1	1	P14618	C6(Carbamidomethyl); R13(Arg10)	0	2.81895e+06				0	3.644e-08	48.83	0.003451	2	1369.71	-0.490824	36.6847	0
	High	GDLGIEIPAEk	3	1	1	P14618	K11(Lys8)	0	2.39294e+06	0.653306	3	1.0448	0	0.0001913	47.64	0.00308473	2	1149.62	0.206108	38.1721	0
	High	LAPITSDPTEATAVGAVEASFK	8	1	1	P14618		0	2.90791e+06	0.578523	2	6.27938	0	1.003e-09	43.68	0.0204696	3	2175.12	0.928227	52.8903	0
	High	GDYPLEAVR	3	1	1	P14618		0	3.65433e+06	0.743913	2	5.88408	0	5.904e-07	40.85	0.0120623	2	1019.52	-0.00853469	34.7702	0
	High	APIIAVTr	3	1	1	P14618	R8(Arg10)	0	3.95731e+06	0.754473	3	8.37712	0	0.000242	39.99	0.00396412	2	850.538	0.0228646	29.5135	0
	High	ITLDNAYmEK	2	1	1	P14618	M8(Oxidation)	0	2.35893e+06	0.830802	2	7.12539	0	0.002295	38.51	0.0272063	2	1213.58	0.189305	31.8599	0
	High	GVNLPGAAVDLPAVSEk	2	1	1	P14618	K17(Lys8)	0	2.85904e+06	0.61794	1		0	5.532e-06	38.12	0.0416876	2	1644.91	1.30564	46.1789	0
	High	LAPITSDPTEATAVGAVEASFk	8	1	1	P14618	K22(Lys8)	0	1.66802e+06	0.605596	3	5.34867	0	2.758e-07	34.82	0.158064	2	2183.13	0.0465008	52.9822	0
	High	DPVQEAWAEDVDLR	3	1	1	P14618		0	749514	0.631661	3	11.306	0	1.115e-07	29.18	0.444475	2	1642.77	1.39252	46.503	0
	High	AEGSDVANAVLDGADcImLSGETAK	2	1	1	P14618	C16(Carbamidomethyl); M18(Oxidation)	0	603163	0.788622	2	64.786	0	1.194e-05	29.12	0.848414	3	2510.14	-0.516723	50.363	0
	High	VNFAmNVGk	2	1	1	P14618	M5(Oxidation); K9(Lys8)	0	2.05831e+06	0.89842	2	5.68788	0	0.002006	28.93	0.196001	2	1003.51	-0.185195	26.7357	0
	High	GDLGIEIPAEK	1	1	1	P14618		0	3.93002e+06				0	0.002104	28.56	0.288662	2	1141.61	-0.0792039	38.1557	0
	High	VNFAmNVGK	3	1	1	P14618	M5(Oxidation)	0	2.44986e+06	1.0327	1		0	0.007486	27.44	0.278476	2	995.498	-0.3316	28.2626	0
	High	TATESFASDPILYRPVAVALDTK	2	1	1	P14618		0	3.02521e+06	0.525646	2	49.0367	0	0.007641	24.79	1.54762	3	2465.29	0.0455467	53.5911	0
	High	GDYPLEAVr	1	1	1	P14618	R9(Arg10)	0	1.58334e+06				0.001	0.01516	31.69	0.0993422	2	1029.52	0.259557	34.9625	0
	High	ITLDNAYmEk	1	1	1	P14618	M8(Oxidation); K10(Lys8)	0	1.89905e+06				0.001	0.009347	27.04	0.404982	2	1221.59	-0.243444	29.4751	0
	High	KGVNLPGAAVDLPAVSEK	2	1	1	P14618		0	1.39764e+06	0.334858	2	120.638	0.004	0.03122	22.88	1.06755	3	1764.99	1.19701	42.0208	1
	High	ITLDNAYMEk	1	1	1	P14618	K10(Lys8)	0	490500	1.10929	1		0.006	0.03642	22.45	1.20654	2	1205.59	-1.73067	36.4347	0
	High	VNFAMNVGk	1	1	1	P14618	K9(Lys8)	0	385717	0.976191	1		0.008	0.08141	22.63	0.936793	2	987.517	-0.640165	35.2651	0
P04406	Glyceraldehyde-3-phosphate dehydrogenase OS=Homo sapiens GN=GAPDH PE=1 SV=3 - [G3P_HUMAN]	777.866	40.6	1	9	9	44	1.42307e+07	0.885516	22	15.6817	335	36.0304	8.45557
	A2	Sequence	# PSMs	# Proteins	# Protein Groups	Protein Group Accessions	Modifications	ΔCn	Area	Heavy/Light	Heavy/Light Count	Heavy/Light Variability [%]	q-Value	PEP	IonScore	Exp Value	Charge	MH+ [Da]	ΔM [ppm]	RT [min]	# Missed Cleavages
	High	IISNAScTTNcLAPLAk	4	1	1	P04406	C7(Carbamidomethyl); C11(Carbamidomethyl); K17(Lys8)	0	4.02049e+06	0.79743	1		0	3.852e-16	91.24	3.17899e-07	2	1841.93	0.330962	38.1101	0
	High	IISNAScTTNcLAPLAK	3	1	1	P04406	C7(Carbamidomethyl); C11(Carbamidomethyl)	0	5.07939e+06	0.921565	2	6.9386	0	3.841e-17	80.75	3.69457e-06	2	1833.92	2.2839	36.5861	0
	High	VPTANVSVVDLTcR	4	1	1	P04406	C13(Carbamidomethyl)	0	1.02259e+07	0.949216	2	3.6496	0	3.615e-11	75.85	8.76124e-06	2	1530.8	0.369902	40.3197	0
	High	VPTANVSVVDLTcr	5	1	1	P04406	C13(Carbamidomethyl); R14(Arg10)	0	7.46195e+06	0.862317	3	4.95322	0	1.298e-09	70.63	2.74281e-05	2	1540.8	0.546576	39.9009	0
	High	LISWYDNEFGYSNr	4	1	1	P04406	R14(Arg10)	0	2.03608e+06	0.96931	2	1.37101	0	4.641e-07	58.2	0.000574548	2	1773.81	1.45997	48.9731	0
	High	WGDAGAEYVVESTGVFTTmEK	5	1	1	P04406	M19(Oxidation)	0	2.05018e+06	0.999073	2	2.25013	0	3.784e-10	48.75	0.00837918	2	2293.04	2.23164	51.6913	0
	High	WGDAGAEYVVESTGVFTTMEK	1	1	1	P04406		0	417655	1.23563	1		0	5.012e-12	48.22	0.00915264	2	2277.04	-0.414717	55.8961	0
	High	VIISAPSADAPmFVmGVNHEK	2	1	1	P04406	M12(Oxidation); M15(Oxidation)	0	1.16901e+07	0.724143	2	1.32895	0	3.78e-10	39.87	0.0615553	3	2245.1	0.759432	40.7269	0
	High	LISWYDNEFGYSNR	3	1	1	P04406		0	2.35562e+06	0.981426	1		0	5.574e-07	37.46	0.0621068	2	1763.8	-0.00313935	47.9603	0
	High	WGDAGAEYVVESTGVFTTMEk	2	1	1	P04406	K21(Lys8)	0	423698				0	7.027e-08	35.03	0.199438	2	2285.05	-0.537104	55.8506	0
	High	WGDAGAEYVVESTGVFTTmEk	4	1	1	P04406	M19(Oxidation); K21(Lys8)	0	1.93837e+06	1.11048	1		0	2.969e-08	34.77	0.205424	2	2301.05	1.99479	51.8526	0
	High	GALQNIIPASTGAAk	1	1	1	P04406	K15(Lys8)	0	1.38452e+07	0.740448	1		0	0.001116	24.04	0.699964	2	1419.81	0.93358	38.1637	0
	High	GALQNIIPASTGAAK	1	1	1	P04406		0	2.07761e+07				0	0.002293	20.55	1.83038	2	1411.79	-0.0711849	38.1037	0
	High	VIISAPSADAPmFVmGVNHEk	1	1	1	P04406	M12(Oxidation); M15(Oxidation); K21(Lys8)	0	7.47872e+06				0	0.006086	15.41	17.8097	3	2253.12	1.38963	40.7642	0
	High	VVDLmAHmASkE	1	1	1	P04406	M5(Oxidation); M8(Oxidation); K11(Lys8)	0	1.1368e+06	0.761568	1		0	0.00237	14.59	8.37388	2	1370.65	0.274243	23.6601	1
	High	VGVNGFGr	1	1	1	P04406	R8(Arg10)	0	1.259e+06	0.697459	1		0.001	0.01241	39.3	0.0114024	2	815.44	-0.40417	25.8696	0
	High	LVINGNPITIFQER	1	1	1	P04406		0	568150	0.716856	1		0.004	0.03033	12.57	11.4045	2	1613.9	0.836512	52.6854	0
	High	VVDLmAHmASKE	1	1	1	P04406	M5(Oxidation); M8(Oxidation)	0	922347	0.759512	1		0.007	0.07419	16.15	5.86997	2	1362.64	0.931448	21.9739	1
P68371	Tubulin beta-4B chain OS=Homo sapiens GN=TUBB4B PE=1 SV=1 - [TBB4B_HUMAN]	698.557	53.26	1	4	15	66	8.73148e+06	1.05086	36	25.7761	445	49.799	4.89404
	A2	Sequence	# PSMs	# Proteins	# Protein Groups	Protein Group Accessions	Modifications	ΔCn	Area	Heavy/Light	Heavy/Light Count	Heavy/Light Variability [%]	q-Value	PEP	IonScore	Exp Value	Charge	MH+ [Da]	ΔM [ppm]	RT [min]	# Missed Cleavages
	High	ISEQFTAmFR	2	2	2	P68371;P07437	M8(Oxidation)	0	1.80235e+06	1.30635	2	0.468483	0	3.663e-06	71.24	1.45852e-05	2	1245.59	-0.381556	39.1787	0
	High	YLTVAAVFr	2	2	2	P68371;P07437	R9(Arg10)	0	1.29523e+06	1.48962	2	14.642	0	1.511e-06	61.44	9.70099e-05	2	1049.6	-0.530118	46.1687	0
	High	ImNTFSVVPSPK	3	2	2	P68371;P07437	M2(Oxidation)	0	1.22422e+07	0.816279	1		0	3.285e-06	57.94	0.000371846	2	1335.7	0.666091	36.1531	0
	High	ImNTFSVVPSPk	4	2	2	P68371;P07437	M2(Oxidation); K12(Lys8)	0	8.99375e+06	0.80729	2	9.64508	0	2.152e-08	57.5	0.000426254	2	1343.71	0.633211	38.3399	0
	High	LAVNmVPFPR	2	2	2	P68371;P07437	M5(Oxidation)	0	5.64022e+06	0.850795	1		0	3.768e-06	53.74	0.000883166	2	1159.63	-0.505845	39.6536	0
	High	EVDEQmLNVQNk	3	2	2	P68371;P07437	M6(Oxidation); K12(Lys8)	0	7.22191e+06	1.12574	2	1.08197	0	0.000166	49.88	0.00301826	2	1470.7	1.18149	25.7906	0
	High	LAVNmVPFPr	3	2	2	P68371;P07437	M5(Oxidation); R10(Arg10)	0	4.27424e+06	0.71503	2	27.1289	0	6.785e-06	49.73	0.00202506	2	1169.64	-0.161246	39.6365	0
	High	ISEQFTAmFr	2	2	2	P68371;P07437	M8(Oxidation); R10(Arg10)	0	2.01361e+06				0	1.262e-05	49.06	0.00267328	2	1255.6	0.813443	39.1732	0
	High	INVYYNEATGGk	3	1	1	P68371	K12(Lys8)	0	1.64032e+06	1.12417	3	2.35734	0	9.883e-07	44.43	0.00931916	2	1336.66	0.776094	32.1683	0
	High	EAEScDcLQGFQLTHSLGGGTGSGmGTLLISK	1	2	2	P68371;P07437	C5(Carbamidomethyl); C7(Carbamidomethyl); M25(Oxidation)	0	2.91301e+06	1.18728	1		0	1.188e-09	41.33	0.0832982	3	3327.54	2.52633	49.899	0
	High	EVDEQmLNVQNK	3	2	2	P68371;P07437	M6(Oxidation)	0	7.23186e+06	1.10958	1		0	1.615e-06	40.75	0.0229154	2	1462.69	1.0476	24.4116	0
	High	EVDEQMLNVQNK	3	2	2	P68371;P07437		0	3.03724e+06	1.09243	2	4.09294	0	0.0001604	40.49	0.0261739	2	1446.69	0.835048	30.9825	0
	High	EVDEQMLNVQNk	3	2	2	P68371;P07437	K12(Lys8)	0	2.92696e+06	1.21312	1		0	7.912e-05	39.87	0.0318647	2	1454.7	0.384175	31.8947	0
	High	YLTVAAVFR	1	2	2	P68371;P07437		0	709142	1.53579	1		0	0.002898	35.57	0.046148	2	1039.6	1.66521	47.7287	0
	High	IMNTFSVVPSPK	1	2	2	P68371;P07437		0	980002	0.821717	1		0	0.0004104	32.36	0.136509	2	1319.7	-1.699	42.3606	0
	High	SGPFGQIFrPDNFVFGQSGAGNNWAk	2	2	2	P68371;P07437	R9(Arg10); K26(Lys8)	0	1.29975e+06	0.989713	1		0	1.676e-10	32.12	0.520286	3	2816.37	0.224403	57.3835	0
	High	SGPFGQIFRPDNFVFGQSGAGNNWAK	3	2	2	P68371;P07437		0	1.51811e+06				0	6.756e-12	30.63	0.745732	3	2798.35	0.795462	57.4414	0
	High	NSSYFVEWIPNNVK	5	2	2	P68371;P07437		0	2.39188e+06	1.03916	1		0	0.007128	29.77	0.401669	2	1696.84	2.33397	50.8769	0
	High	FPGQLNADLR	2	2	2	P68371;P07437		0	6.72037e+06	0.419198	1		0	0.0005445	28.99	0.250725	2	1130.6	0.68604	36.3467	0
	High	AVLVDLEPGTmDSVR	3	1	1	P68371	M11(Oxidation)	0	1.79005e+06	0.968014	3	9.01083	0	0.0008996	27.86	0.555945	2	1617.82	1.36368	40.0606	0
	High	mSATFIGNSTAIQELFk	1	1	1	P68371	M1(Oxidation); K17(Lys8)	0	485410	1.21228	1		0	1.122e-05	27.32	0.827046	2	1881.95	1.82463	56.3061	0
	High	NSSYFVEWIPNNVk	3	2	2	P68371;P07437	K14(Lys8)	0	1.9445e+06	0.906834	2	3.42648	0	2.648e-05	26.71	0.878068	2	1704.85	0.58177	51.7891	0
	High	FPGQLNADLr	2	2	2	P68371;P07437	R10(Arg10)	0	1.95988e+06	0.631119	1		0	3.973e-05	23.92	0.766208	2	1140.6	-0.148296	38.0491	0
	High	INVYYNEATGGK	2	1	1	P68371		0	1.73686e+06				0	0.001504	19.24	3.00967	2	1328.65	0.166883	29.8241	0
	High	EAEScDcLQGFQLTHSLGGGTGSGmGTLLISk	1	2	2	P68371;P07437	C5(Carbamidomethyl); C7(Carbamidomethyl); M25(Oxidation); K32(Lys8)	0	3.1127e+06				0	8.994e-05	17.82	18.44	3	3335.54	-1.33404	49.8353	0
	High	AVLVDLEPGTmDSVr	1	1	1	P68371	M11(Oxidation); R15(Arg10)	0	1.31876e+06				0	0.002376	17.81	5.85894	2	1627.83	2.72463	40.5215	0
	High	LTTPTYGDLNHLVSATmSGVTTcLR	1	2	2	P68371;P07437	M17(Oxidation); C23(Carbamidomethyl)	0	1.02514e+06	1.06274	1		0	7.501e-06	16.4	17.6569	3	2724.34	1.61114	53.1218	0
	High	LTTPTYGDLNHLVSATmSGVTTcLr	1	2	2	P68371;P07437	M17(Oxidation); C23(Carbamidomethyl); R25(Arg10)	0	1.01107e+06				0	0.001579	10.02	75.5314	3	2734.35	3.31331	53.128	0
	High	GHYTEGAELVDSVLDVVR	1	2	2	P68371;P07437		0	298139	1.24167	1		0.003	0.02288	12.82	23.9754	2	1958.99	2.79276	58.7333	0
	High	ISEQFTAMFR	1	2	2	P68371;P07437		0	285295	0.0277546	1		0.006	0.04308	26.16	0.527542	2	1229.6	1.03747	46.652	0
	High	ALTVPELTQQmFDAK	1	1	1	P68371	M11(Oxidation)	0	802896	0.64982	1		0.007	0.07419	13.19	18.014	2	1707.86	1.03929	45.5122	0
P00558	Phosphoglycerate kinase 1 OS=Homo sapiens GN=PGK1 PE=1 SV=3 - [PGK1_HUMAN]	676.399	45.08	1	13	13	47	4.81468e+06	0.930366	24	19.388	417	44.5861	8.104
	A2	Sequence	# PSMs	# Proteins	# Protein Groups	Protein Group Accessions	Modifications	ΔCn	Area	Heavy/Light	Heavy/Light Count	Heavy/Light Variability [%]	q-Value	PEP	IonScore	Exp Value	Charge	MH+ [Da]	ΔM [ppm]	RT [min]	# Missed Cleavages
	High	GcITIIGGGDTATccAk	4	1	1	P00558	C2(Carbamidomethyl); C14(Carbamidomethyl); C15(Carbamidomethyl); K17(Lys8)	0	4.28703e+06	1.18234	1		0	7.709e-15	70.84	2.82432e-05	2	1762.8	1.60678	35.8333	0
	High	GcITIIGGGDTATccAK	4	1	1	P00558	C2(Carbamidomethyl); C14(Carbamidomethyl); C15(Carbamidomethyl)	0	4.31141e+06	1.06901	2	4.8894	0	1.591e-15	69.85	3.29175e-05	2	1754.79	0.314542	35.8274	0
	High	VLNNmEIGTSLFDEEGAK	4	1	1	P00558	M5(Oxidation)	0	3.06321e+06	1.01558	3	7.22761	0	5.729e-07	61.18	0.000375133	2	1982.94	1.97667	43.7185	0
	High	LGDVYVNDAFGTAHR	4	1	1	P00558		0	3.17415e+06	0.88344	1		0	3.157e-08	56.15	0.000848707	2	1634.79	0.119096	39.928	0
	High	VLPGVDALSNI	3	1	1	P00558		0	6.95848e+06				0	1.078e-05	52.4	0.000900276	2	1097.62	0.336817	52.0383	0
	High	LGDVYVNDAFGTAHr	3	1	1	P00558	R15(Arg10)	0	2.93125e+06	1.01147	3	0.455478	0	7.827e-09	50.06	0.00357822	3	1644.8	0.574813	38.2443	0
	High	ITLPVDFVTADKFDENAK	1	1	1	P00558		0	793678	0.712891	1		0	5.367e-08	45.21	0.0135887	2	2023.04	0.133718	51.8464	1
	High	AcANPAAGSVILLENLr	2	1	1	P00558	C2(Carbamidomethyl); R17(Arg10)	0	653856	0.774385	1		0	1.176e-08	35.24	0.100929	2	1778.94	-0.793034	53.5976	0
	High	VLNNmEIGTSLFDEEGAk	4	1	1	P00558	M5(Oxidation); K18(Lys8)	0	2.75287e+06				0	1.327e-06	35.17	0.151041	2	1990.95	0.906892	43.7274	0
	High	YSLEPVAVELK	3	1	1	P00558		0	1.89248e+06	0.922834	3	8.46504	0	3.443e-05	34.91	0.0594689	2	1247.69	0.234723	43.0785	0
	High	VSHVSTGGGASLELLEGk	1	1	1	P00558	K18(Lys8)	0	878207	1.0783	1		0	7.168e-05	27.81	0.569916	3	1748.93	0.927244	38.1209	0
	High	YAEAVTr	2	1	1	P00558	R7(Arg10)	0	496965	1.18058	2	41.2679	0	0.004042	24.84	0.343844	2	819.424	0.0979322	19.4831	0
	High	AcANPAAGSVILLENLR	3	1	1	P00558	C2(Carbamidomethyl)	0	883260	0.551625	1		0	3.198e-05	22.71	1.82385	2	1768.94	1.11673	52.638	0
	High	VDFNVPmk	1	1	1	P00558	M7(Oxidation); K8(Lys8)	0	722764				0	0.001187	18.7	2.14822	2	973.491	0.509496	29.9023	0
	High	TGQATVASGIPAGWmGLDcGPESSKK	1	1	1	P00558	M15(Oxidation); C19(Carbamidomethyl)	0	1.14678e+06	0.609461	1		0.002	0.01656	14.24	28.944	3	2621.24	0.742965	41.1936	1
	High	AHSSmVGVNLPQk	2	1	1	P00558	M5(Oxidation); K13(Lys8)	0	1.16642e+06	0.819575	2	5.39692	0.003	0.02331	29.88	0.281676	3	1391.72	0.464497	25.9732	0
	High	VDFNVPmK	1	1	1	P00558	M7(Oxidation)	0	1.03358e+06	0.791242	1		0.004	0.03082	29.33	0.17473	2	965.476	-0.0782181	29.8853	0
	High	YSLEPVAVELk	1	1	1	P00558	K11(Lys8)	0	1.38818e+06				0.004	0.02468	20.25	1.65258	2	1255.7	0.202291	43.3923	0
	High	NNQITNNQr	2	1	1	P00558	R9(Arg10)	0	111559	0.213715	1		0.004	0.02663	11.37	14.2171	2	1111.55	0.144781	15.5866	0
	High	AHSSmVGVNLPQK	1	1	1	P00558	M5(Oxidation)	0	1.45357e+06				0.004	0.0309	10.82	21.7707	2	1383.71	0.637307	27.6842	0
P13796	Plastin-2 OS=Homo sapiens GN=LCP1 PE=1 SV=6 - [PLSL_HUMAN]	664.153	28.07	1	14	14	65	5.72635e+06	0.934961	38	15.8811	627	70.2439	5.42725
	A2	Sequence	# PSMs	# Proteins	# Protein Groups	Protein Group Accessions	Modifications	ΔCn	Area	Heavy/Light	Heavy/Light Count	Heavy/Light Variability [%]	q-Value	PEP	IonScore	Exp Value	Charge	MH+ [Da]	ΔM [ppm]	RT [min]	# Missed Cleavages
	High	FSLVGIGGQDLNEGNr	3	1	1	P13796	R16(Arg10)	0	5.85471e+06	1.0009	1		0	2.624e-12	82.23	2.30867e-06	2	1685.85	0.803514	44.7477	0
	High	FSLVGIGGQDLNEGNR	3	1	1	P13796		0	6.43662e+06	0.957349	2	3.19783	0	1.397e-10	81.23	2.83073e-06	2	1675.84	1.08071	44.7389	0
	High	QFVTATDVVR	3	1	1	P13796		0	3.89821e+06	0.984008	3	7.07305	0	1.546e-07	69.17	2.13852e-05	2	1135.61	0.637915	34.0108	0
	High	QFVTATDVVr	3	1	1	P13796	R10(Arg10)	0	3.62076e+06				0	0.0004539	50.42	0.00168673	2	1145.62	0.0207601	34.0164	0
	High	VYALPEDLVEVNPk	3	1	1	P13796	K14(Lys8)	0	2.58091e+06	0.668683	2	5.38007	0	7.719e-08	49.8	0.0028796	2	1593.86	0.629952	46.8969	0
	High	EGIcAIGGTSEQSSVGTQHSYSEEEk	4	1	1	P13796	C4(Carbamidomethyl); K26(Lys8)	0	6.6066e+06	1.1786	2	5.74074	0	1.46e-08	44.18	0.0286783	3	2778.23	0.222394	30.8266	0
	High	EGIcAIGGTSEQSSVGTQHSYSEEEK	3	1	1	P13796	C4(Carbamidomethyl)	0	6.474e+06	1.14156	2	5.1185	0	9.623e-07	42.59	0.0405257	3	2770.22	1.88951	31.6533	0
	High	TENLNDDEKLNNAK	4	1	1	P13796		0	3.87375e+06	0.930523	3	8.84121	0	3.181e-06	41.12	0.0281913	2	1617.77	0.522426	23.5488	1
	High	NWmNSLGVNPR	5	1	1	P13796	M3(Oxidation)	0	1.36e+06	0.968537	3	29.3472	0	1.466e-05	39.63	0.0236026	2	1303.62	1.04316	34.8922	0
	High	EITENLmATGDLDQDGR	1	1	1	P13796	M7(Oxidation)	0	1.14237e+06	0.785207	1		0	3.8e-06	37.07	0.081823	2	1893.85	1.9171	35.401	0
	High	mINLSVPDTIDER	4	1	1	P13796	M1(Oxidation)	0	2.69803e+06	0.721995	2	13.663	0	2.057e-05	36.16	0.0780056	2	1518.75	-0.0280029	41.7635	0
	High	TENLNDDEkLNNAk	3	1	1	P13796	K9(Lys8); K14(Lys8)	0	3.24168e+06	0.929815	1		0	2.51e-05	35.03	0.117235	3	1633.8	0.424162	21.1166	1
	High	NWmNSLGVNPr	4	1	1	P13796	M3(Oxidation); R11(Arg10)	0	1.27144e+06	0.882315	2	12.2095	0	0.002308	32	0.141839	2	1313.63	1.70989	37.5398	0
	High	GDEEGVPAVVIDmSGLr	2	1	1	P13796	M13(Oxidation); R17(Arg10)	0	802526	0.956246	2	2.95288	0	0.0002877	31.83	0.272661	2	1769.86	0.357568	43.5727	0
	High	mINLSVPDTIDEr	3	1	1	P13796	M1(Oxidation); R13(Arg10)	0	1.9352e+06	0.79696	1		0	0.000116	31.62	0.227049	2	1528.76	0.871313	41.7695	0
	High	VYALPEDLVEVNPK	3	1	1	P13796		0	4.13582e+06	0.730473	1		0	2.75e-06	30.79	0.230555	2	1585.85	0.426705	48.0179	0
	High	LSPEELLLR	2	1	1	P13796		0	3.06715e+06	0.758715	2	8.50295	0	0.008118	27.7	0.203025	2	1069.63	0.275405	47.2063	0
	High	IGNFSTDIK	3	1	1	P13796		0	1.36615e+06				0	0.006231	24.49	0.532914	2	994.52	-0.366177	32.237	0
	High	LSPEELLLr	1	1	1	P13796	R9(Arg10)	0	1.52998e+06				0	0.00825	21.63	0.850591	2	1079.63	0.302289	47.5145	0
	High	GDEEGVPAVVIDmSGLR	1	1	1	P13796	M13(Oxidation)	0	1.00575e+06	0.850164	1		0	0.0008418	18.67	5.71171	2	1759.86	2.49182	43.8443	0
	High	YAFVNWINk	1	1	1	P13796	K9(Lys8)	0	157762	1.14004	1		0	0.004216	16.28	4.49814	2	1162.61	1.18308	46.3845	0
	High	EITENLmATGDLDQDGr	1	1	1	P13796	M7(Oxidation); R17(Arg10)	0	338696	0.872582	1		0	0.002541	10.73	34.9945	2	1903.86	-0.256267	36.591	0
	High	IGNFSTDIk	3	1	1	P13796	K9(Lys8)	0	1.12217e+06	0.991964	3	8.15907	0.001	0.01266	33.3	0.0676345	2	1002.53	-0.0975906	32.2424	0
	High	IGNFSTDIkDSk	1	1	1	P13796	K9(Lys8); K12(Lys8)	0	490346	0.648666	1		0.001	0.0153	23	1.25923	2	1340.7	1.02175	30.9034	1
	High	ISFDEFIk	1	1	1	P13796	K8(Lys8)	0	826227	1.02997	1		0.002	0.01565	18.42	2.27042	2	1006.53	-0.074946	47.521	0
P35527	Keratin, type I cytoskeletal 9 OS=Homo sapiens GN=KRT9 PE=1 SV=3 - [K1C9_HUMAN]	657.782	38.2	1	16	16	45	4.71662e+07	0.01	40	0	623	62.0268	5.23682
	A2	Sequence	# PSMs	# Proteins	# Protein Groups	Protein Group Accessions	Modifications	ΔCn	Area	Heavy/Light	Heavy/Light Count	Heavy/Light Variability [%]	q-Value	PEP	IonScore	Exp Value	Charge	MH+ [Da]	ΔM [ppm]	RT [min]	# Missed Cleavages
	High	GGGGSFGYSYGGGSGGGFSASSLGGGFGGGSR	3	1	1	P35527		0	2.08235e+06	0.014601	2	60.8387	0	1.264e-16	93.6	2.82797e-07	2	2705.16	0.966543	47.2913	0
	High	GSRGGSGGSYGGGGSGGGYGGGSGSR	5	1	1	P35527		0	2.4794e+07	0.01	5	0	0	2.017e-15	90.51	3.27982e-07	3	2091.88	0.495106	16.5535	1
	High	GGSGGSYGGGGSGGGYGGGSGSR	6	1	1	P35527		0	54064841	0.01	3	0	0	1.106e-12	72.05	1.38126e-05	2	1791.73	0.970284	17.4089	0
	High	GGSGGSHGGGSGFGGESGGSYGGGEEASGSGGGYGGGSGK	3	1	1	P35527		0	1.26161e+07	0.01	3	0	0	1.17e-19	55.07	0.00182736	3	3223.28	0.555692	25.2734	0
	High	GGSGGSHGGGSGFGGESGGSYGGGEEASGSGGGYGGGSGKSSHS	5	1	1	P35527		0	2.60187e+07	0.01	5	0	0	1.362e-16	53.72	0.00284983	4	3621.44	0.785489	25.229	1
	High	SGGGGGGGLGSGGSIRSSYSR	3	1	1	P35527		0	5.207e+06	0.01	3	0	0	1.041e-07	53.27	0.00204922	3	1812.86	0.780589	25.4477	1
	High	FSSSSGYGGGSSR	4	1	1	P35527		0	6.46598e+06	0.119031	3	13.2665	0	5.588e-06	50.87	0.00112744	2	1235.53	-0.120797	20.3451	0
	High	QGVDADINGLR	2	1	1	P35527		0	1.53464e+06	0.01	2	0	0	0.001394	30.83	0.153354	2	1157.59	0.315217	31.6032	0
	High	FSSSGGGGGGGRFSSSSGYGGGSSR	2	1	1	P35527		0	3.49311e+06	0.01	2	0	0	9.785e-05	30.47	0.400298	3	2198.95	0.829952	23.6485	1
	High	STmQELNSR	1	1	1	P35527	M3(Oxidation)	0	2.89395e+06	0.01	1		0	4.526e-05	30.1	0.124647	2	1081.49	-0.0999323	17.6233	0
	High	TLLDIDNTR	3	1	1	P35527		0	2.46866e+06	0.01	3	0	0	0.0003487	24.94	0.560937	2	1060.56	-0.421937	37.0563	0
	High	QFSSSYLSR	3	1	1	P35527		0	4.54145e+06	0.01	3	0	0	0.00709	24.48	0.549469	2	1074.52	0.0564658	29.7282	0
	High	SGGGGGGGLGSGGSIR	1	1	1	P35527		0	6.1415e+07	0.01	1		0	0.0004513	23.68	0.824099	2	1232.6	0.145027	22.8749	0
	High	EIETYHNLLEGGQEDFESSGAGK	1	1	1	P35527		0	119138	0.115421	1		0	7.965e-07	17.54	12.1523	3	2510.13	1.09371	44.0606	0
	High	DIENQYETQITQIEHEVSSSGQEVQSSAK	1	1	1	P35527		0	1.11168e+06	0.0232595	1		0	0.000125	16.38	24.6565	3	3264.52	1.17141	55.1889	0
	High	SSYSRFSSSGGGGGGGR	2	1	1	P35527		0	1.67532e+06	0.01	2	0	0.001	0.01223	11.64	17.216	3	1562.69	0.167592	18.9941	1
P13645	Keratin, type I cytoskeletal 10 OS=Homo sapiens GN=KRT10 PE=1 SV=6 - [K1C10_HUMAN]	655.094	33.9	1	13	16	39	4.40983e+07	0.01	35	0	584	58.7917	5.21143
	A2	Sequence	# PSMs	# Proteins	# Protein Groups	Protein Group Accessions	Modifications	ΔCn	Area	Heavy/Light	Heavy/Light Count	Heavy/Light Variability [%]	q-Value	PEP	IonScore	Exp Value	Charge	MH+ [Da]	ΔM [ppm]	RT [min]	# Missed Cleavages
	High	GSLGGGFSSGGFSGGSFSR	5	1	1	P13645		0	9.71228e+07	0.01	5	0	0	1.115e-15	110.16	3.30931e-09	2	1707.77	1.02009	40.5822	0
	High	ISSSKGSLGGGFSSGGFSGGSFSR	8	1	1	P13645		0	3.11595e+07	0.01	6	0	0	9e-12	69.95	6.10741e-05	2	2210.05	2.01086	38.0947	1
	High	ALEESNYELEGK	3	1	1	P13645		0	1.98353e+06	0.01	3	0	0	9.541e-08	46.67	0.00503213	2	1381.65	0.102579	31.507	0
	High	SLLEGEGSSGGGGR	3	1	1	P13645		0	4.01248e+06	0.01	3	0	0	7.874e-08	46.56	0.00427359	2	1262.6	0.486789	24.8926	0
	High	GSSGGGcFGGSSGGYGGLGGFGGGSFR	2	1	1	P13645	C7(Carbamidomethyl)	0	768534	0.0177651	1		0	2.893e-11	42.35	0.0253681	2	2342.98	-0.226627	46.1219	0
	High	LENEIQTYR	3	1	1	P13645		0	2.26771e+06	0.01	3	0	0	0.001906	35.98	0.0470377	2	1165.59	0.169217	27.0139	0
	High	NVSTGDVNVEmNAAPGVDLTQLLNNmR	5	1	1	P13645	M11(Oxidation); M26(Oxidation)	0	3.1954e+06	0.0135925	4	47.967	0	3.092e-11	29.75	0.981187	3	2904.39	1.04154	52.0873	0
	High	VTmQNLNDR	1	2	2	P08779;P13645	M3(Oxidation)	0	65946.2	0.0977375	1		0	0.003088	16.16	4.14843	2	1106.53	-0.450126	18.6473	0
	High	IRLENEIQTYR	1	1	1	P13645		0	908509	0.0113445	1		0.001	0.01228	32.28	0.153214	2	1434.77	0.896682	36.218	1
	High	LASYLDKVR	1	2	2	P08779;P13645		0	857840	0.01	1		0.001	0.01386	16.61	2.77971	2	1064.61	-0.115057	29.2108	1
	High	DAEAWFNEK	1	1	1	P13645		0	831465	0.01	1		0.003	0.02099	43.3	0.00580927	2	1109.49	0.150099	36.6261	0
	High	VLDELTLTK	1	1	1	P13645		0	585525	0.65046	1		0.003	0.02185	24.96	0.37325	2	1031.6	-0.272626	38.9258	0
	High	QSVEADINGLRR	1	1	1	P13645		0	1.37855e+06	0.333928	1		0.006	0.04449	38.76	0.0336139	3	1357.72	0.138611	32.8403	1
	High	SSSSGSVGESSSKGPR	1	1	1	P13645		0	381700	0.0295189	1		0.006	0.04279	11.69	18.0049	2	1495.7	0.924871	15.398	1
	High	LAADDFR	2	2	2	P08779;P13645		0	3.68841e+06	0.01	2	0	0.007	0.06954	34.49	0.0350652	2	807.4	0.21741	28.5854	0
	High	SQYEQLAEQNRK	1	1	1	P13645		0	2.44873e+06	0.01	1		0.008	0.07989	25.35	0.901631	2	1493.74	1.52541	24.9147	1
P68104	Elongation factor 1-alpha 1 OS=Homo sapiens GN=EEF1A1 PE=1 SV=1 - [EF1A1_HUMAN]	503.003	26.62	4	9	9	40	9.176e+06	0.71705	21	14.7705	462	50.1091	9.01221
	A2	Sequence	# PSMs	# Proteins	# Protein Groups	Protein Group Accessions	Modifications	ΔCn	Area	Heavy/Light	Heavy/Light Count	Heavy/Light Variability [%]	q-Value	PEP	IonScore	Exp Value	Charge	MH+ [Da]	ΔM [ppm]	RT [min]	# Missed Cleavages
	High	IGGIGTVPVGr	3	4	1	P68104	R11(Arg10)	0	8.29986e+06	0.693168	3	4.36719	0	1.289e-11	91.21	7.46994e-08	2	1035.62	0.0362799	32.3838	0
	High	NmITGTSQADcAVLIVAAGVGEFEAGISK	2	4	1	P68104	M2(Oxidation); C11(Carbamidomethyl)	0	2.10341e+06	0.728219	1		0	3.366e-09	70.46	7.885e-05	3	2925.44	0.9958	69.5093	0
	High	IGGIGTVPVGR	3	4	1	P68104		0	1.26164e+07				0	4.519e-07	59.53	0.000120344	2	1025.61	-0.232398	33.0965	0
	High	NmITGTSQADcAVLIVAAGVGEFEAGISk	2	4	1	P68104	M2(Oxidation); C11(Carbamidomethyl); K29(Lys8)	0	1.2593e+06				0	1.731e-05	46.04	0.0219505	3	2933.44	-4.07619	69.5698	0
	High	LPLQDVYk	3	4	1	P68104	K8(Lys8)	0	5.59882e+06	0.645166	3	2.33505	0	0.003723	41.4	0.00957704	2	983.565	-0.0805485	35.0994	0
	High	YYVTIIDAPGHr	4	4	1	P68104	R12(Arg10)	0	1.20717e+06	0.527743	1		0	0.003283	39.91	0.0277287	2	1414.74	0.566383	39.1167	0
	High	YYVTIIDAPGHR	5	4	1	P68104		0	2.20915e+06	0.687245	4	8.16186	0	4.487e-05	38.52	0.0398404	2	1404.73	0.808493	37.2177	0
	High	QTVAVGVIk	3	4	1	P68104	K9(Lys8)	0	3.33696e+06	0.76249	3	0.317264	0	0.001231	33.49	0.0258554	2	922.581	-0.227713	29.1544	0
	High	VETGVLKPGmVVTFAPVNVTTEVK	3	4	1	P68104	M10(Oxidation)	0	5.08073e+06	0.628197	2	0.0237553	0	1.851e-10	27.58	0.48787	3	2531.38	-0.2948	49.1564	0
	High	LPLQDVYK	3	4	1	P68104		0	9.83088e+06				0	0.001429	25.07	0.424905	2	975.551	0.0211718	35.0206	0
	High	STTTGHLIYk	2	4	1	P68104	K10(Lys8)	0	2.70289e+06	0.849971	2	5.87691	0	0.008907	18.64	2.36344	2	1128.61	-0.091413	22.1401	0
	High	VETGVLkPGmVVTFAPVNVTTEVk	1	4	1	P68104	K7(Lys8); M10(Oxidation); K24(Lys8)	0	2.87207e+06				0.001	0.01153	11.74	13.5049	3	2547.41	0.682866	49.2201	0
	High	STTTGHLIYK	2	4	1	P68104		0	3.47325e+06				0.002	0.01706	28.93	0.219094	2	1120.6	0.160463	25.1259	0
	High	EHALLAYTLGVK	1	2	1	P68104		0	180980	0.729118	1		0.006	0.05185	21.27	1.45296	2	1314.74	-0.12065	43.2463	0
	High	QTVAVGVIK	2	4	1	P68104		0	4.87308e+06				0.006	0.04394	17.3	1.55484	2	914.567	-0.454183	29.1307	0
	High	QLIVGVNK	1	2	1	P68104		0	1.78575e+06	0.911957	1		0.007	0.0705	25.34	0.185245	2	870.541	-0.29567	30.3337	0
P19338	Nucleolin OS=Homo sapiens GN=NCL PE=1 SV=3 - [NUCL_HUMAN]	459.703	17.46	1	12	12	40	2.02174e+06	0.815403	22	12.5516	710	76.5684	4.70361
	A2	Sequence	# PSMs	# Proteins	# Protein Groups	Protein Group Accessions	Modifications	ΔCn	Area	Heavy/Light	Heavy/Light Count	Heavy/Light Variability [%]	q-Value	PEP	IonScore	Exp Value	Charge	MH+ [Da]	ΔM [ppm]	RT [min]	# Missed Cleavages
	High	NDLAVVDVR	3	1	1	P19338		0	1.81598e+06	0.714653	2	8.89068	0	1.282e-05	61.24	0.000108196	2	1000.54	-0.0183983	34.8949	0
	High	EVFEDAAEIR	3	1	1	P19338		0	1.66146e+06	0.807633	2	6.15919	0	5.702e-05	59.6	0.00020389	2	1178.57	0.44311	35.1424	0
	High	NDLAVVDVr	3	1	1	P19338	R9(Arg10)	0	1.24006e+06	0.874696	1		0	5.193e-05	57.23	0.000268334	2	1010.55	-0.0471646	34.9128	0
	High	GLSEDTTEETLK	3	1	1	P19338		0	1.48767e+06	0.745982	2	15.2256	0	7.516e-06	54.94	0.000718685	2	1322.63	0.37556	27.3326	0
	High	EVFEDAAEIr	2	1	1	P19338	R10(Arg10)	0	1.02587e+06	0.675186	1		0	7.914e-07	46.92	0.00397326	2	1188.58	0.0553067	34.3894	0
	High	GLSEDTTEETLk	2	1	1	P19338	K12(Lys8)	0	714284	0.710683	1		0	2.046e-07	43.73	0.0105106	2	1330.65	0.711057	29.6711	0
	High	TLVLSNLSYSATEETLQEVFEK	4	1	1	P19338		0	1.71766e+06	0.880158	1		0	2.532e-10	42.89	0.0305162	2	2501.27	1.01023	64.0309	0
	High	TLVLSNLSYSATEETLQEVFEk	4	1	1	P19338	K22(Lys8)	0	1.20715e+06	0.780877	1		0	1.082e-08	42.7	0.0313949	2	2509.28	-1.05168	64.0905	0
	High	FGYVDFESAEDLEK	2	1	1	P19338		0	313445	0.902427	1		0	3.062e-06	36.73	0.0593765	2	1648.74	2.10902	48.4129	0
	High	SISLYYTGEK	1	1	1	P19338		0	2.26385e+06	0.907456	1		0	0.0004688	33.46	0.0841449	2	1160.58	0.438231	34.448	0
	High	GFGFVDFNSEEDAK	3	1	1	P19338		0	919412	0.883462	2	4.96312	0	1.161e-05	33.39	0.103723	2	1561.68	1.15859	47.279	0
	High	GFGFVDFNSEEDAk	1	1	1	P19338	K14(Lys8)	0	1.38807e+06	0.851854	1		0	7.654e-06	24.7	0.767313	2	1569.7	0.661326	46.0578	0
	High	GLSEDTTEETLkESFDGSVr	1	1	1	P19338	K12(Lys8); R20(Arg10)	0	57565.4	0.874792	1		0	0.002954	10.81	51.0317	2	2218.05	-0.482786	43.8731	1
	High	TGISDVFAK	2	1	1	P19338		0	1.9854e+06	0.90128	1		0.001	0.009951	33.57	0.0560196	2	937.499	0.0412812	35.8053	0
	High	TGISDVFAk	2	1	1	P19338	K9(Lys8)	0	1.61046e+06	0.80477	1		0.001	0.01083	32.15	0.0837199	2	945.513	-0.193808	36.4549	0
	High	KFGYVDFESAEDLEK	1	1	1	P19338		0	0				0.001	0.01435	10.46	37.6755	2	1776.83	0.308556	45.2924	1
	High	LELQGPr	2	1	1	P19338	R7(Arg10)	0	1.57641e+06	0.732731	2	2.17432	0.002	0.01766	38.28	0.00857385	2	822.47	-0.567586	25.247	0
	High	GIAYIEFK	1	1	1	P19338		0	1.38596e+06	0.660567	1		0.006	0.03463	23.7	0.656293	2	940.514	0.152416	40.5953	0
P50990-2	Isoform 2 of T-complex protein 1 subunit theta OS=Homo sapiens GN=CCT8 - [TCPQ_HUMAN]	459.206	16.64	2	7	7	24	1.62618e+06	0.967767	16	47.6857	529	57.6084	5.38916
	A2	Sequence	# PSMs	# Proteins	# Protein Groups	Protein Group Accessions	Modifications	ΔCn	Area	Heavy/Light	Heavy/Light Count	Heavy/Light Variability [%]	q-Value	PEP	IonScore	Exp Value	Charge	MH+ [Da]	ΔM [ppm]	RT [min]	# Missed Cleavages
	High	AIADTGANVVVTGGK	3	2	1	P50990-2		0	1.56989e+06	0.970665	1		0	8.764e-14	93.19	1.16072e-07	2	1372.74	1.11106	30.6425	0
	High	AIADTGANVVVTGGk	3	2	1	P50990-2	K15(Lys8)	0	1.36327e+06	0.989944	2	3.804	0	3.528e-12	65.91	5.8201e-05	2	1380.76	0.546033	29.7447	0
	High	LATNAAVTVLR	3	2	1	P50990-2		0	1.06532e+06	1.00729	2	1.81326	0	5.04e-09	64.68	3.40919e-05	2	1128.67	0.0356907	34.7661	0
	High	FAEAFEAIPR	3	2	1	P50990-2		0	1.25223e+06	0.598152	3	4.74824	0	1.094e-08	59.73	0.00018846	2	1150.59	-0.355109	40.9249	0
	High	LATNAAVTVLr	3	2	1	P50990-2	R11(Arg10)	0	954037	0.963607	1		0	2.718e-09	59.65	9.78244e-05	2	1138.68	0.599303	34.7603	0
	High	LFVTNDAATILr	2	2	1	P50990-2	R12(Arg10)	0	1.07099e+06	1.4507	2	10.6848	0	1.636e-06	36.89	0.0390359	2	1343.76	-0.345061	45.8324	0
	High	LVPGGGATEIELAK	2	2	1	P50990-2		0	2.05643e+06	0.717232	2	6.75728	0	3.745e-05	36.86	0.0408623	2	1354.76	0.628319	36.2054	0
	High	LFVTNDAATILR	2	2	1	P50990-2		0	763407	1.37766	1		0	5.537e-05	29.49	0.206365	2	1333.75	1.27596	45.9415	0
	High	LVPGGGATEIELAk	1	2	1	P50990-2	K14(Lys8)	0	1.26837e+06				0	0.0001088	18.22	2.73223	2	1362.77	0.685695	36.2575	0
	High	DIDEVSSLLr	1	2	1	P50990-2	R10(Arg10)	0	517869	0.73313	1		0.003	0.02174	18.55	2.62866	2	1156.61	-0.399915	45.142	0
	High	IAVYScPFDGmITETK	1	2	1	P50990-2	C6(Carbamidomethyl); M11(Oxidation)	0	417292	1.47061	1		0.006	0.04596	13.08	20.7887	2	1847.86	1.40678	41.3004	0
P35579	Myosin-9 OS=Homo sapiens GN=MYH9 PE=1 SV=4 - [MYH9_HUMAN]	441.415	9.29	1	13	13	39	5.00099e+06	0.898873	25	19.1894	1960	226.392	5.60498
	A2	Sequence	# PSMs	# Proteins	# Protein Groups	Protein Group Accessions	Modifications	ΔCn	Area	Heavy/Light	Heavy/Light Count	Heavy/Light Variability [%]	q-Value	PEP	IonScore	Exp Value	Charge	MH+ [Da]	ΔM [ppm]	RT [min]	# Missed Cleavages
	High	ALELDSNLYr	2	1	1	P35579	R10(Arg10)	0	504448	1.20696	2	31.2945	0	8.519e-10	87.85	3.60766e-07	2	1203.62	-0.0624141	38.32	0
	High	GAGDGsDEEVDGKADGAEAKPAE	5	1	1	P35579	S6(Phospho)	0	2.91881e+06	0.837025	4	5.60614	0	9.515e-09	50.1	0.00278561	2	2254.9	1.40877	24.0178	1
	High	IAEFTTNLTEEEEk	4	1	1	P35579	K14(Lys8)	0	1.03639e+06	0.915844	2	33.4849	0	2.062e-07	49.71	0.00383791	2	1661.8	1.29083	37.14	0
	High	IAQLEEELEEEQGNTELINDR	2	1	1	P35579		0	697449	0.963335	2	20.0123	0	8.845e-11	49.57	0.00820717	2	2472.18	1.63041	46.927	0
	High	ALELDSNLYR	2	1	1	P35579		0	534885				0	0.0004253	46.01	0.00500721	2	1193.62	0.0127059	38.312	0
	High	IAEFTTNLTEEEEK	2	1	1	P35579		0	1.09408e+06	1.05253	1		0	3.582e-06	45.55	0.00929171	2	1653.79	1.68964	37.1133	0
	High	IIGLDQVAGmSETALPGAFk	1	1	1	P35579	M10(Oxidation); K20(Lys8)	0	333816	0.89612	1		0	6.549e-07	35.76	0.108852	2	2042.08	1.56485	51.3205	0
	High	GAGDGsDEEVDGkADGAEAkPAE	4	1	1	P35579	S6(Phospho); K13(Lys8); K20(Lys8)	0	1.8339e+06	0.794334	1		0	1.458e-07	34.01	0.141778	2	2270.93	0.612065	24.0241	1
	High	IIGLDQVAGmSETALPGAFK	1	1	1	P35579	M10(Oxidation)	0	588247				0	1.681e-07	33.75	0.189531	2	2034.06	-0.0302419	51.3142	0
	High	IAQLEEQLDNETk	1	1	1	P35579	K13(Lys8)	0	436869	0.898873	1		0	1.093e-10	30.11	0.330083	2	1538.78	0.155989	36.3115	0
	High	IAQLEEQLDNETK	1	1	1	P35579		0	469076				0	1.056e-06	27.75	0.535538	2	1530.76	-0.615266	36.299	0
	High	KGAGDGsDEEVDGKADGAEAKPAE	4	1	1	P35579	S7(Phospho)	0	3.90909e+06	0.912805	3	1.38265	0	0.001308	23.97	1.8047	2	2382.99	0.411274	20.526	2
	High	KGAGDGsDEEVDGK	1	1	1	P35579	S7(Phospho)	0	0				0	0.001051	23.2	0.490596	2	1443.56	0.277191	14.5291	1
	High	DFSALESQLQDTQELLQEENR	1	1	1	P35579		0	393343	0.707173	1		0	0.0001418	22.65	3.93232	2	2493.17	-0.0784447	58.8325	0
	High	LQVELDNVTGLLSQSDSK	1	1	1	P35579		0	149127	1.20539	1		0	1.755e-05	22.48	2.39985	2	1946.01	1.05443	51.6738	0
	High	LQVELDNVTGLLSQSDSk	1	1	1	P35579	K18(Lys8)	0	247968	0.96495	1		0	0.0001287	20.81	3.31484	2	1954.02	1.28011	52.4097	0
	High	QAQQErDELADEIANSSGk	1	1	1	P35579	R6(Arg10); K19(Lys8)	0	676270	0.972693	1		0	0.001889	13.7	23.3062	3	2107	-0.634979	32.8802	1
	High	VVFQEFr	1	1	1	P35579	R7(Arg10)	0	8.17508e+06	1.07582	1		0.001	0.01388	41.95	0.00974309	2	934.502	0.0347715	35.0049	0
	High	kGAGDGsDEEVDGk	2	1	1	P35579	K1(Lys8); S7(Phospho); K14(Lys8)	0	1.26389e+06	100	1		0.001	0.01414	23.19	0.682181	2	1459.59	0.806353	16.4593	1
	High	kGAGDGsDEEVDGkADGAEAkPAE	1	1	1	P35579	K1(Lys8); S7(Phospho); K14(Lys8); K21(Lys8)	0	2.40216e+06	0.781212	1		0.006	0.05294	25.14	1.64749	2	2407.04	1.2716	20.5351	2
	High	NTDQASmPDNTAAQk	1	1	1	P35579	M7(Oxidation); K15(Lys8)	0	244823	0.711708	1		0.006	0.03701	11.49	19.7795	2	1615.71	1.73629	15.6776	0
P00338	L-lactate dehydrogenase A chain OS=Homo sapiens GN=LDHA PE=1 SV=2 - [LDHA_HUMAN]	380.439	17.47	2	4	6	23	4.30564e+06	0.8524	14	12.4076	332	36.6654	8.26514
	A2	Sequence	# PSMs	# Proteins	# Protein Groups	Protein Group Accessions	Modifications	ΔCn	Area	Heavy/Light	Heavy/Light Count	Heavy/Light Variability [%]	q-Value	PEP	IonScore	Exp Value	Charge	MH+ [Da]	ΔM [ppm]	RT [min]	# Missed Cleavages
	High	VTLTSEEEAr	3	2	1	P00338	R10(Arg10)	0	4.83543e+06	0.809187	2	6.68004	0	5.445e-07	68.53	2.86946e-05	2	1144.57	0.353839	25.6208	0
	High	VTLTSEEEAR	3	2	1	P00338		0	6.41767e+06	0.828402	1		0	4.46e-06	57.1	0.000416682	2	1134.56	0.651725	24.267	0
	High	LVIITAGAr	2	2	1	P00338	R9(Arg10)	0	1.23748e+06	0.783579	2	2.21346	0	3.571e-06	54.56	0.000162899	2	923.591	-0.414024	35.0417	0
	High	VIGSGcNLDSAr	1	3	2	P00338;P07195	C6(Carbamidomethyl); R12(Arg10)	0	2.62421e+06	0.906819	1		0	2.031e-07	48.55	0.00302663	2	1258.61	-0.677539	26.8974	0
	High	VIGSGcNLDSAR	3	3	2	P00338;P07195	C6(Carbamidomethyl)	0	4.20107e+06	0.970244	2	14.1572	0	4.371e-06	41.96	0.0129715	2	1248.6	0.660297	26.92	0
	High	QVVESAYEVIk	3	2	1	P00338	K11(Lys8)	0	1.53233e+06	0.79746	2	10.9512	0	0.0001636	41.38	0.0152652	2	1272.69	0.545774	35.7453	0
	High	QVVESAYEVIK	3	2	1	P00338		0	2.29819e+06	0.913937	1		0	0.0004486	30.85	0.192734	2	1264.68	0.193856	36.3354	0
	High	SADTLWGIQk	1	2	1	P00338	K10(Lys8)	0	299959	0.758961	1		0.001	0.01308	29.41	0.219652	2	1126.6	-0.312721	39.3918	0
	High	LVIITAGAR	1	2	1	P00338		0	1.05093e+06				0.003	0.02341	34.64	0.015065	2	913.583	0.0811215	35.0241	0
	High	LNLVQr	2	3	2	P00338;P07195	R6(Arg10)	0	1.00228e+06	1.05676	2	13.983	0.006	0.05086	46.87	0.00120475	2	752.465	-0.219028	27.8009	0
	High	SADTLWGIQK	1	2	1	P00338		0	698793				0.006	0.04175	16.2	4.59137	2	1118.58	-0.171106	39.3236	0
P13647	Keratin, type II cytoskeletal 5 OS=Homo sapiens GN=KRT5 PE=1 SV=3 - [K2C5_HUMAN]	377.494	14.75	1	9	9	21	2.3536e+07	0.01	21	0	590	62.34	7.73779
	A2	Sequence	# PSMs	# Proteins	# Protein Groups	Protein Group Accessions	Modifications	ΔCn	Area	Heavy/Light	Heavy/Light Count	Heavy/Light Variability [%]	q-Value	PEP	IonScore	Exp Value	Charge	MH+ [Da]	ΔM [ppm]	RT [min]	# Missed Cleavages
	High	SFSTASAITPSVSR	3	1	1	P13647		0	2.05993e+07	0.01	3	0	0	3.05e-08	74.05	1.12122e-05	2	1410.72	0.740734	35.4258	0
	High	GLGVGFGSGGGSSSSVK	3	1	1	P13647		0	1.57069e+07	0.01	3	0	0	1.416e-11	73.39	1.32334e-05	2	1439.71	0.671853	34.2797	0
	High	ISISTSGGSFR	3	1	1	P13647		0	3.43017e+07	0.01	3	0	0	2.688e-06	63.71	7.55437e-05	2	1111.57	-0.764181	31.9397	0
	High	VSLAGAcGVGGYGSR	2	1	1	P13647	C7(Carbamidomethyl)	0	400032	0.0210127	2	5.67016	0	1.315e-09	56.31	0.00061909	2	1410.68	0.775718	32.7622	0
	High	TSFTSVSR	2	1	1	P13647		0	1.0835e+07	0.01	2	0	0	0.001104	39.61	0.0102066	2	884.447	-0.275033	21.9314	0
	High	SGGSRSFSTASAITPSVSR	4	1	1	P13647		0	1.84863e+06	0.01	4	0	0	8.706e-05	31.2	0.340184	3	1854.93	0.396905	33.1996	1
	High	SLYNLGGSKR	2	1	1	P13647		0	9.13205e+06	0.01	2	0	0.001	0.01316	34.26	0.0564897	2	1094.6	0.392313	28.4373	1
	High	QSSVSFR	1	1	1	P13647		0	3.20737e+06	0.01	1		0.003	0.02209	24.38	0.364389	2	810.411	0.197178	23.0154	0
	High	SLYNLGGSK	1	1	1	P13647		0	1.60354e+06	0.01	1		0.004	0.02831	33.46	0.0494771	2	938.494	-0.144004	28.6908	0
P13639	Elongation factor 2 OS=Homo sapiens GN=EEF2 PE=1 SV=4 - [EF2_HUMAN]	372.756	12.7	1	9	9	32	2.04542e+06	0.830965	20	20.6595	858	95.277	6.82959
	A2	Sequence	# PSMs	# Proteins	# Protein Groups	Protein Group Accessions	Modifications	ΔCn	Area	Heavy/Light	Heavy/Light Count	Heavy/Light Variability [%]	q-Value	PEP	IonScore	Exp Value	Charge	MH+ [Da]	ΔM [ppm]	RT [min]	# Missed Cleavages
	High	ETVSEESNVLcLSK	3	1	1	P13639	C11(Carbamidomethyl)	0	1.5162e+06	0.8151	3	14.8414	0	1.165e-08	63.66	0.000141342	2	1594.77	1.48052	37.0124	0
	High	YEWDVAEAR	3	1	1	P13639		0	1.58882e+06	0.847138	3	5.91437	0	5.036e-08	56.43	0.000292805	2	1138.52	0.101703	37.3315	0
	High	VNFTVDQIR	4	1	1	P13639		0	1.69211e+06	0.950325	3	4.66694	0	0.0003799	50.5	0.00159044	2	1091.58	-0.253994	36.1016	0
	High	VFSGLVSTGLk	2	1	1	P13639	K11(Lys8)	0	1.43771e+06	0.825846	2	14.2218	0	0.0004426	50.01	0.00127556	2	1115.66	0.64448	39.5479	0
	High	STLTDSLVcK	3	1	1	P13639	C9(Carbamidomethyl)	0	1.83065e+06	0.667962	2	21.293	0	0.0003009	44.29	0.00717413	2	1123.57	0.378046	34.1458	0
	High	VFSGLVSTGLK	3	1	1	P13639		0	1.75824e+06	0.994271	1		0	0.0001058	38.75	0.0173424	2	1107.64	0.574004	41.5884	0
	High	VNFTVDQIr	3	1	1	P13639	R9(Arg10)	0	1.2399e+06				0	0.001381	38.1	0.027445	2	1101.59	-0.333649	36.1098	0
	High	cLYASVLTAQPR	2	1	1	P13639	C1(Carbamidomethyl)	0	973934	0.872921	2	41.4064	0	0.0008498	23.78	0.996938	2	1378.71	0.0696654	39.1082	0
	High	ETVSEESNVLcLSk	1	1	1	P13639	C11(Carbamidomethyl); K14(Lys8)	0	957793				0	3.022e-05	23.75	1.47446	2	1602.78	0.839593	37.043	0
	High	STLTDSLVck	3	1	1	P13639	C9(Carbamidomethyl); K10(Lys8)	0	954810	0.354104	1		0.001	0.009017	29.74	0.202359	2	1131.58	0.0174137	31.7324	0
	High	VTDGALVVVDcVSGVcVQTETVLR	2	1	1	P13639	C11(Carbamidomethyl); C16(Carbamidomethyl)	0	1.03134e+06	1.021	1		0.002	0.01702	21.71	4.13351	3	2576.31	1.85724	56.2939	0
	High	GGGQIIPTAR	1	1	1	P13639		0	2.54737e+06	0.661779	1		0.004	0.03052	17.01	2.38184	2	969.548	0.119428	25.7189	0
	High	GEGQLGPAEr	1	1	1	P13639	R10(Arg10)	0	527883	0.659432	1		0.006	0.05574	16.27	3.70005	2	1023.51	-0.054086	21.5252	0
	High	VTDGALVVVDcVSGVcVQTETVLr	1	1	1	P13639	C11(Carbamidomethyl); C16(Carbamidomethyl); R24(Arg10)	0	947692				0.006	0.04892	10.42	54.9776	3	2586.32	1.31956	56.3	0
P10809	60 kDa heat shock protein, mitochondrial OS=Homo sapiens GN=HSPD1 PE=1 SV=2 - [CH60_HUMAN]	366.99	20.77	1	8	8	25	2.68572e+06	0.813212	14	9.64218	573	61.0164	5.87158
	A2	Sequence	# PSMs	# Proteins	# Protein Groups	Protein Group Accessions	Modifications	ΔCn	Area	Heavy/Light	Heavy/Light Count	Heavy/Light Variability [%]	q-Value	PEP	IonScore	Exp Value	Charge	MH+ [Da]	ΔM [ppm]	RT [min]	# Missed Cleavages
	High	LVQDVANNTNEEAGDGTTTATVLAR	6	1	1	P10809		0	5.89181e+06	0.822383	5	3.32601	0	9.43e-15	77.71	1.23297e-05	2	2560.26	3.21539	36.3828	0
	High	IQEIIEQLDVTTSEYEK	1	1	1	P10809		0	1.14909e+06	0.677442	1		0	2.719e-16	68.14	7.40453e-05	2	2038.02	0.369868	50.3264	0
	High	LVQDVANNTNEEAGDGTTTATVLAr	6	1	1	P10809	R25(Arg10)	0	4.28712e+06	0.883896	1		0	6.076e-12	63.24	0.000351342	2	2570.26	1.4105	36.4136	0
	High	VGLQVVAVk	1	1	1	P10809	K9(Lys8)	0	649224	0.851854	1		0	0.002145	43.89	0.00118617	2	920.602	0.182576	33.4887	0
	High	VGLQVVAVK	2	1	1	P10809		0	937352	0.678808	1		0	0.0008985	36.64	0.00986305	2	912.588	-0.174545	34.1179	0
	High	VGGTSDVEVNEk	1	1	1	P10809	K12(Lys8)	0	1.01625e+06	1.98901	1		0	4.753e-06	35.32	0.0637764	2	1241.61	0.419561	22.4395	0
	High	IQEIIEQLDVTTSEYEk	2	1	1	P10809	K17(Lys8)	0	700601				0	2.218e-06	30.37	0.449707	2	2046.04	1.78131	50.4014	0
	High	TVIIEQSWGSPK	1	1	1	P10809		0	699831	0.37936	1		0	0.0001406	28.9	0.303254	2	1344.72	-0.25998	39.1411	0
	High	NAGVEGSLIVEK	1	1	1	P10809		0	373459	0.840511	1		0	4.03e-05	26.74	0.421024	2	1215.66	2.00442	34.2239	0
	High	ImQSSSEVGYDAmAGDFVNmVEK	1	1	1	P10809	M2(Oxidation); M13(Oxidation); M20(Oxidation)	0	104758	0.0452185	1		0	1.778e-10	25.98	1.50374	3	2556.1	1.46518	42.1647	0
	High	VGGTSDVEVNEK	2	1	1	P10809		0	567704				0	0.008965	22.06	1.3031	2	1233.6	0.255866	20.2274	0
	High	VTDALNATR	1	1	1	P10809		0	778536	0.693618	1		0.001	0.01255	21.57	0.922334	2	960.511	-0.274421	23.3653	0
P02538	Keratin, type II cytoskeletal 6A OS=Homo sapiens GN=KRT6A PE=1 SV=3 - [K2C6A_HUMAN]	319.683	7.98	1	3	4	11	1.09335e+07	0.01	11	0	564	60.0083	8.00146
	A2	Sequence	# PSMs	# Proteins	# Protein Groups	Protein Group Accessions	Modifications	ΔCn	Area	Heavy/Light	Heavy/Light Count	Heavy/Light Variability [%]	q-Value	PEP	IonScore	Exp Value	Charge	MH+ [Da]	ΔM [ppm]	RT [min]	# Missed Cleavages
	High	SGFSSVSVSR	3	1	1	P02538		0	1.18542e+07	0.01	3	0	0	2.081e-09	75.68	3.60978e-06	2	1012.51	0.125144	26.4632	0
	High	AIGGGLSSVGGGSSTIK	3	1	1	P02538		0	1.42835e+07	0.01	3	0	0	2.226e-13	73.69	1.07831e-05	2	1447.78	0.851987	34.4129	0
	High	AIGGGLSSVGGGSSTIKYTTTSSSSR	4	1	1	P02538		0	6.66283e+06	0.01	4	0	0	1.698e-09	43.96	0.0259979	3	2418.21	0.962108	34.7228	1
	High	AQYEEIAQR	1	3	3	P02538;P04259;P35908		0	1.17572e+06	0.01	1		0.004	0.02608	39.19	0.0193529	2	1107.54	0.0587325	23.3999	0
P67809	Nuclease-sensitive element-binding protein 1 OS=Homo sapiens GN=YBX1 PE=1 SV=3 - [YBOX1_HUMAN]	315.468	37.35	2	7	7	35	1.43664e+07	0.727492	21	15.2001	324	35.9027	9.87646
	A2	Sequence	# PSMs	# Proteins	# Protein Groups	Protein Group Accessions	Modifications	ΔCn	Area	Heavy/Light	Heavy/Light Count	Heavy/Light Variability [%]	q-Value	PEP	IonScore	Exp Value	Charge	MH+ [Da]	ΔM [ppm]	RT [min]	# Missed Cleavages
	High	GAEAANVTGPGGVPVQGSK	3	2	1	P67809		0	2.97443e+06	0.526608	3	6.6695	0	3.788e-11	82.65	2.08744e-06	2	1695.87	1.72469	28.2291	0
	High	NYQQNYQNsESGEKNEGSESAPEGQAQQR	3	2	1	P67809	S9(Phospho)	0	1.76914e+07	0.740709	3	1.75331	0	5.182e-11	48.82	0.00921558	3	3337.37	1.86593	23.717	1
	High	NEGSEsAPEGQAQQR	2	2	1	P67809	S6(Phospho)	0	1.54839e+07	0.683869	1		0	5.025e-06	43.59	0.00741819	2	1667.67	0.760036	16.347	0
	High	RPQYSNPPVQGEVmEGADNQGAGEQGRPVR	2	2	1	P67809	M14(Oxidation)	0	4.50652e+06	0.247991	2	9.42741	0	6.249e-09	37.99	0.170848	4	3239.53	0.519725	30.5107	0
	High	NYQQNYQNsESGEkNEGSESAPEGQAQQr	3	2	1	P67809	S9(Phospho); K14(Lys8); R29(Arg10)	0	9.95736e+06				0	3.171e-08	37.96	0.12459	3	3355.39	2.14485	23.731	1
	High	NYQQNYQNSESGEKNEGSESAPEGQAQQR	3	2	1	P67809		0	2.84193e+06	0.673241	2	9.43957	0	7.562e-07	30.98	0.700799	3	3257.4	1.73124	24.4623	1
	High	NEGSEsAPEGQAQQr	4	2	1	P67809	S6(Phospho); R15(Arg10)	0	9.53005e+06	0.691575	2	7.51733	0	0.001873	30.52	0.147623	2	1677.67	0.119591	16.3559	0
	High	AADPPAENSsAPEAEQGGAE	3	2	1	P67809	S10(Phospho)	0	7247429				0	1.354e-05	29.84	0.21425	2	1977.78	2.27427	24.1821	0
	High	NYQQNYQNSESGEkNEGSESAPEGQAQQr	2	2	1	P67809	K14(Lys8); R29(Arg10)	0	1.80821e+06	0.738787	1		0	4.629e-06	21.33	7.11434	3	3275.42	1.7941	23.5624	1
	High	EDGNEEDkENQGDETQGQQPPQr	1	2	1	P67809	K8(Lys8); R23(Arg10)	0	5.1248e+06	0.584898	1		0	3.729e-08	17.28	11.5618	3	2646.13	0.915742	19.2558	1
	High	GAEAANVTGPGGVPVQGSk	1	2	1	P67809	K19(Lys8)	0	971249				0	3.151e-05	16.41	8.29215	2	1703.88	0.834075	29.3071	0
	High	NYQQNYQNsESGEK	2	2	1	P67809	S9(Phospho)	0	4.67455e+06	0.819899	2	6.37442	0	0.003726	15.99	3.67707	2	1768.68	1.19341	20.2084	0
	High	EDGNEEDKENQGDETQGQQPPQR	1	2	1	P67809		0	9.92386e+06				0	4.787e-05	11.45	41.5793	3	2628.11	1.1105	19.2497	1
	High	NEGSESAPEGQAQQr	2	2	1	P67809	R15(Arg10)	0	671107	0.739467	1		0.002	0.01713	10.64	20.9574	2	1597.71	0.216004	15.4047	0
	High	NYQQNYQNSESGEk	1	2	1	P67809	K14(Lys8)	0	319100	0.831634	1		0.003	0.02282	17.65	4.48889	2	1696.73	1.59405	20.6619	0
	High	NEGSESAPEGQAQQR	1	2	1	P67809		0	545256	1.1693	1		0.006	0.03752	11.25	18.9836	2	1587.7	1.50439	15.3422	0
	High	NYQQNYQNsESGEk	1	2	1	P67809	S9(Phospho); K14(Lys8)	0	4.32464e+06	0.820468	1		0.007	0.06153	21.14	1.25061	2	1776.7	0.822635	18.6203	0
P29401	Transketolase OS=Homo sapiens GN=TKT PE=1 SV=3 - [TKT_HUMAN]	292.779	15.73	2	6	6	25	4.89731e+06	0.601401	15	21.7454	623	67.8347	7.66455
	A2	Sequence	# PSMs	# Proteins	# Protein Groups	Protein Group Accessions	Modifications	ΔCn	Area	Heavy/Light	Heavy/Light Count	Heavy/Light Variability [%]	q-Value	PEP	IonScore	Exp Value	Charge	MH+ [Da]	ΔM [ppm]	RT [min]	# Missed Cleavages
	High	TSRPENAIIYNNNEDFQVGQAK	2	2	1	P29401		0	9.47069e+06	0.878675	2	7.40979	0	1.084e-12	64.88	0.000243669	3	2508.21	0.149447	36.4763	0
	High	ILATPPQEDAPSVDIANIR	6	2	1	P29401		0	2.8112e+06	0.553018	4	3.5351	0	2.145e-11	53.31	0.00170657	3	2020.07	1.04104	44.4298	0
	High	SVPTSTVFYPSDGVATEk	2	2	1	P29401	K18(Lys8)	0	1.6823e+06	0.775594	1		0	2.666e-06	34.43	0.161918	2	1892.94	1.80293	38.5427	0
	High	TSrPENAIIYNNNEDFQVGQAk	2	2	1	P29401	R3(Arg10); K22(Lys8)	0	7.7895e+06				0	2.362e-12	33.82	0.302937	3	2526.24	0.894561	37.0366	0
	High	ILATPPQEDAPSVDIANIr	5	2	1	P29401	R19(Arg10)	0	1.39247e+06	0.555132	2	9.64809	0	2.064e-09	33.06	0.187418	3	2030.08	-0.181121	44.6743	0
	High	ISSDLDGHPVPK	2	2	1	P29401		0	1.16042e+06	0.662254	2	22.837	0	0.0002003	31.5	0.158544	2	1264.65	0.767881	27.723	0
	High	SVPTSTVFYPSDGVATEK	4	2	1	P29401		0	2.41005e+06	0.76205	2	0.0665106	0	9.375e-06	24.52	1.60098	2	1884.93	1.31312	38.4629	0
	High	AVELAANTK	1	2	1	P29401		0	688946	1.00953	1		0	0.003742	19.72	1.12526	2	916.51	0.203014	22.6323	0
	High	LGQSDPAPLQHQmDIYQK	1	2	1	P29401	M13(Oxidation)	0	1.8982e+06	0.601401	1		0.006	0.04457	15.62	15.1952	3	2085.01	1.26206	31.2257	0
Q99832-3	Isoform 3 of T-complex protein 1 subunit eta OS=Homo sapiens GN=CCT7 - [TCPH_HUMAN]	286.595	9.62	2	3	3	13	861471	0.925188	6	3.49882	499	54.7695	7.6792
	A2	Sequence	# PSMs	# Proteins	# Protein Groups	Protein Group Accessions	Modifications	ΔCn	Area	Heavy/Light	Heavy/Light Count	Heavy/Light Variability [%]	q-Value	PEP	IonScore	Exp Value	Charge	MH+ [Da]	ΔM [ppm]	RT [min]	# Missed Cleavages
	High	ATISNDGATILK	3	2	1	Q99832-3		0	1.17604e+06	0.88146	2	4.41831	0	0.0002262	60.79	0.000168654	2	1203.66	0.308637	31.6901	0
	High	SQDAEVGDGTTSVTLLAAEFLK	4	2	1	Q99832-3		0	763737	0.926934	1		0	1.002e-12	57	0.00114957	2	2252.13	1.44514	62.0197	0
	High	SQDAEVGDGTTSVTLLAAEFLk	1	2	1	Q99832-3	K22(Lys8)	0	637140				0	5.645e-10	55.73	0.00153243	2	2260.14	-0.737563	62.0042	0
	High	ATISNDGATILk	3	2	1	Q99832-3	K12(Lys8)	0	961176	0.951986	1		0	3.641e-05	48.65	0.00277352	2	1211.67	-0.128443	33.3405	0
	High	LPIGDVATQYFADR	1	2	1	Q99832-3		0	617425	1.19717	1		0	1.224e-06	40.36	0.028764	2	1565.8	2.05554	48.3975	0
	High	LPIGDVATQYFADr	1	2	1	Q99832-3	R14(Arg10)	0	644637	0.923446	1		0.006	0.05469	11.53	23.915	2	1575.8	-0.416235	48.2225	0
P04075	Fructose-bisphosphate aldolase A OS=Homo sapiens GN=ALDOA PE=1 SV=2 - [ALDOA_HUMAN]	265.543	33.52	2	9	9	28	4.06073e+06	0.724985	14	8.85773	364	39.3953	8.08936
	A2	Sequence	# PSMs	# Proteins	# Protein Groups	Protein Group Accessions	Modifications	ΔCn	Area	Heavy/Light	Heavy/Light Count	Heavy/Light Variability [%]	q-Value	PEP	IonScore	Exp Value	Charge	MH+ [Da]	ΔM [ppm]	RT [min]	# Missed Cleavages
	High	GILAADESTGSIAK	3	2	1	P04075		0	6.17451e+06	0.748264	2	4.88084	0	7.598e-11	72.05	1.63013e-05	2	1332.7	0.0899621	31.7075	0
	High	GILAADESTGSIAk	3	2	1	P04075	K14(Lys8)	0	3.96666e+06	0.771222	1		0	1.046e-07	60.78	0.000205308	2	1340.71	0.0604519	31.7158	0
	High	YTPSGQAGAAASESLFVSNHAY	2	2	1	P04075		0	1.74492e+06				0	3.573e-10	49.35	0.00678576	2	2228.03	0.729752	43.1662	0
	High	QLLLTADDr	2	2	1	P04075	R9(Arg10)	0	1.37503e+06	0.869963	2	27.3259	0	3.072e-05	48.41	0.00223744	2	1054.58	-0.243402	32.7974	0
	High	ALANSLAcQGK	3	2	1	P04075	C8(Carbamidomethyl)	0	2.11523e+06	0.723599	2	6.45003	0	3.011e-05	41.16	0.0145961	2	1132.58	0.0664223	23.7816	0
	High	QLLLTADDR	2	2	1	P04075		0	1.61406e+06				0	0.0003571	39.47	0.0155912	2	1044.57	-0.276159	34.5508	0
	High	IGEHTPSALAImENANVLAR	4	2	1	P04075	M12(Oxidation)	0	1.2132e+06	0.580319	1		0	1.152e-07	27.54	0.853325	3	2123.09	0.6558	43.0258	0
	High	IGEHTPSALAImENANVLAr	1	2	1	P04075	M12(Oxidation); R20(Arg10)	0	633640				0	2.289e-06	21.45	3.46685	3	2133.1	0.867916	42.9681	0
	High	ALANSLAcQGk	2	2	1	P04075	C8(Carbamidomethyl); K11(Lys8)	0	1.42542e+06	0.726233	1		0	0.0007906	15.36	4.88709	2	1140.59	0.138923	23.8082	0
	High	PYQYPALTPEQK	2	2	1	P04075		0	3.0805e+06	0.456273	2	16.8779	0.001	0.0119	34.97	0.092692	2	1434.73	0.322667	33.2507	0
	High	ADDGRPFPQVIK	1	2	1	P04075		0	1.39354e+06	0.556758	1		0.002	0.01848	10.91	21.973	3	1342.71	-0.67542	33.4255	0
	High	ELSDIAHr	1	2	1	P04075	R8(Arg10)	0	699293	0.684522	1		0.004	0.02491	30.98	0.0962382	2	950.493	-0.206088	23.7201	0
	High	LQSIGTENTEENRR	1	2	1	P04075		0	2.92718e+06	0.766162	1		0.004	0.03048	20.73	3.18543	3	1646.81	-0.0874912	21.1253	1
	High	ELSDIAHR	1	2	1	P04075		0	1.17824e+06				0.007	0.06906	18.79	1.69853	2	940.484	-0.242073	23.6906	0
A0A087WUT6	Eukaryotic translation initiation factor 5B OS=Homo sapiens GN=EIF5B PE=1 SV=1 - [A0A087WUT6_HUMAN]	254.805	2.95	2	2	2	16	1.17788e+07	0.643345	8	3.94932	1220	138.597	5.57959
	A2	Sequence	# PSMs	# Proteins	# Protein Groups	Protein Group Accessions	Modifications	ΔCn	Area	Heavy/Light	Heavy/Light Count	Heavy/Light Variability [%]	q-Value	PEP	IonScore	Exp Value	Charge	MH+ [Da]	ΔM [ppm]	RT [min]	# Missed Cleavages
	High	NKPGPNIEsGNEDDDASFK	6	2	1	A0A087WUT6	S9(Phospho)	0	2.14434e+07	0.623907	3	2.74244	0	3.941e-07	66.96	6.36337e-05	2	2113.87	1.17342	28.578	0
	High	NkPGPNIEsGNEDDDASFk	6	2	1	A0A087WUT6	K2(Lys8); S9(Phospho); K19(Lys8)	0	1.23644e+07	0.642351	3	2.61167	0	7.028e-10	63.04	0.000186669	2	2129.9	0.784236	28.605	0
	High	QSFDDNDsEELEDKDSK	2	2	1	A0A087WUT6	S8(Phospho)	0	2.11423e+06	0.889284	2	3.10765	0	0.001718	40.65	0.0165957	2	2080.79	0.781135	26.5915	1
	High	QSFDDNDsEELEDkDSk	2	2	1	A0A087WUT6	S8(Phospho); K14(Lys8); K17(Lys8)	0	1.62672e+06				0	0.004442	12.34	14.1048	2	2096.82	0.854548	28.5905	1
P04259	Keratin, type II cytoskeletal 6B OS=Homo sapiens GN=KRT6B PE=1 SV=5 - [K2C6B_HUMAN]	233.836	9.75	1	3	5	12	3.61464e+06	0.01	12	0	564	60.0303	8.00146
	A2	Sequence	# PSMs	# Proteins	# Protein Groups	Protein Group Accessions	Modifications	ΔCn	Area	Heavy/Light	Heavy/Light Count	Heavy/Light Variability [%]	q-Value	PEP	IonScore	Exp Value	Charge	MH+ [Da]	ΔM [ppm]	RT [min]	# Missed Cleavages
	High	SGFSSISVSR	3	1	1	P04259		0	6.79134e+06	0.01	3	0	0	1.708e-09	75.48	4.00359e-06	2	1026.52	0.515289	31.1541	0
	High	YEELQITAGR	3	2	2	P04259;P04264		0	1.52657e+06	0.01	3	0	0	6.697e-05	55.13	0.00062608	2	1179.6	0.551472	32.1325	0
	High	ATGGGLSSVGGGSSTIK	3	1	1	P04259		0	2.52602e+06	0.01	3	0	0	7.383e-06	33.47	0.118742	2	1435.74	0.613149	29.1205	0
	High	ATGGGLSSVGGGSSTIKYTTTSSSSR	2	1	1	P04259		0	1.51083e+06	0.0111293	2	15.9641	0	1.028e-08	27.4	1.30045	3	2406.18	1.32747	31.1596	1
	High	AQYEEIAQR	1	3	3	P02538;P04259;P35908		0	1.17572e+06	0.01	1		0.004	0.02608	39.19	0.0193529	2	1107.54	0.0587325	23.3999	0
P07195	L-lactate dehydrogenase B chain OS=Homo sapiens GN=LDHB PE=1 SV=2 - [LDHB_HUMAN]	226.349	27.84	1	6	8	25	2.90159e+06	0.906819	19	20.653	334	36.6151	6.04932
	A2	Sequence	# PSMs	# Proteins	# Protein Groups	Protein Group Accessions	Modifications	ΔCn	Area	Heavy/Light	Heavy/Light Count	Heavy/Light Variability [%]	q-Value	PEP	IonScore	Exp Value	Charge	MH+ [Da]	ΔM [ppm]	RT [min]	# Missed Cleavages
	High	VIGSGcNLDSAr	1	3	2	P00338;P07195	C6(Carbamidomethyl); R12(Arg10)	0	2.62421e+06	0.906819	1		0	2.031e-07	48.55	0.00302663	2	1258.61	-0.677539	26.8974	0
	High	mVVESAYEVIk	3	1	1	P07195	M1(Oxidation); K11(Lys8)	0	1.30552e+06	0.782735	3	1.37846	0	2.062e-07	48.04	0.00359063	2	1291.67	0.326789	35.3341	0
	High	VIGSGcNLDSAR	3	3	2	P00338;P07195	C6(Carbamidomethyl)	0	4.20107e+06	0.970244	2	14.1572	0	4.371e-06	41.96	0.0129715	2	1248.6	0.660297	26.92	0
	High	ITVVGVGQVGmAcAISILGk	1	1	1	P07195	M11(Oxidation); C13(Carbamidomethyl); K20(Lys8)	0	388472	1.19703	1		0	6.227e-09	40.25	0.0233985	2	1997.1	0.447258	54.6105	0
	High	LIAPVAEEEATVPNNK	3	1	1	P07195		0	2.88349e+06	0.723888	3	2.19356	0	1.328e-06	32.74	0.178549	2	1694.9	1.51978	35.6822	0
	High	GLTSVINQk	3	1	1	P07195	K9(Lys8)	0	1.5053e+06				0	0.0002996	30.21	0.101949	2	967.566	0.0107933	31.2298	0
	High	ITVVGVGQVGmAcAISILGK	1	1	1	P07195	M11(Oxidation); C13(Carbamidomethyl)	0	209809	0.919315	1		0	1.244e-05	15.78	7.28776	2	1989.09	0.468589	54.1819	0
	High	LIAPVAEEEATVPNNk	2	1	1	P07195	K16(Lys8)	0	1.44214e+06				0	0.007766	10.13	30.9253	2	1702.91	1.27477	37.111	0
	High	GLTSVINQK	3	1	1	P07195		0	1620211	0.926539	3	16.1298	0.002	0.01958	35.93	0.0267268	2	959.553	0.623836	31.2245	0
	High	IVVVTAGVR	2	1	1	P07195		0	1.14694e+06	0.957441	2	21.1987	0.004	0.0298	15.52	1.23018	2	913.583	0.0811215	30.3056	0
	High	SADTLWDIQK	1	1	1	P07195		0	398377	1.02644	1		0.004	0.0297	11.33	16.4874	2	1176.59	1.09351	39.371	0
	High	LNLVQr	2	3	2	P00338;P07195	R6(Arg10)	0	1.00228e+06	1.05676	2	13.983	0.006	0.05086	46.87	0.00120475	2	752.465	-0.219028	27.8009	0
Q13283	Ras GTPase-activating protein-binding protein 1 OS=Homo sapiens GN=G3BP1 PE=1 SV=1 - [G3BP1_HUMAN]	222.19	9.66	1	2	2	14	2.40914e+07	0.51293	9	5.6044	466	52.1321	5.51611
	A2	Sequence	# PSMs	# Proteins	# Protein Groups	Protein Group Accessions	Modifications	ΔCn	Area	Heavy/Light	Heavy/Light Count	Heavy/Light Variability [%]	q-Value	PEP	IonScore	Exp Value	Charge	MH+ [Da]	ΔM [ppm]	RT [min]	# Missed Cleavages
	High	SSsPAPADIAQTVQEDLR	6	1	1	Q13283	S3(Phospho)	0	3.74943e+07	0.524814	4	1.36115	0	1.163e-11	64.25	0.000167454	2	1964.9	0.73709	50.4576	0
	High	SSsPAPADIAQTVQEDLr	4	1	1	Q13283	S3(Phospho); R18(Arg10)	0	1.71498e+07	0.510203	1		0	9.377e-12	62.12	0.000281747	2	1974.91	3.03644	50.1065	0
	High	YQDEVFGGFVTEPQEEsEEEVEEPEER	3	1	1	Q13283	S17(Phospho)	0	1.06886e+07	0.452924	3	28.4261	0	0.0002928	41.69	0.044992	2	3296.34	2.2894	49.4668	0
	High	SssPAPADIAQTVQEDLR	1	1	1	Q13283	S2(Phospho); S3(Phospho)	0	41750.6	0.113459	1		0	0.00298	14.61	12.1909	2	2044.86	0.21974	53.0361	0
P50991	T-complex protein 1 subunit delta OS=Homo sapiens GN=CCT4 PE=1 SV=4 - [TCPD_HUMAN]	217.226	15.4	2	5	5	18	1.26733e+06	0.71329	11	16.1028	539	57.8878	7.82568
	A2	Sequence	# PSMs	# Proteins	# Protein Groups	Protein Group Accessions	Modifications	ΔCn	Area	Heavy/Light	Heavy/Light Count	Heavy/Light Variability [%]	q-Value	PEP	IonScore	Exp Value	Charge	MH+ [Da]	ΔM [ppm]	RT [min]	# Missed Cleavages
	High	VIDPATATSVDLr	3	2	1	P50991	R13(Arg10)	0	1.1302e+06	0.71329	3	3.6625	0	3.84e-05	59.31	0.000311042	2	1367.74	-1.41643	37.5047	0
	High	AQDIEAGDGTTSVVIIAGSLLDScTk	3	2	1	P50991	C24(Carbamidomethyl); K26(Lys8)	0	1.04753e+06	0.990101	1		0	1.814e-07	40.72	0.0578656	3	2629.32	3.95288	59.9376	0
	High	VIDPATATSVDLR	3	2	1	P50991		0	1.70316e+06				0	4.892e-07	40.32	0.0227504	2	1357.73	0.527685	38.8655	0
	High	ALIAGGGAPEIELALR	3	2	1	P50991		0	572800	0.742402	3	22.197	0	2.001e-07	39.22	0.0196265	2	1550.89	1.26775	51.4029	0
	High	AQDIEAGDGTTSVVIIAGSLLDScTK	3	2	1	P50991	C24(Carbamidomethyl)	0	1.30629e+06	0.577333	1		0	6.017e-06	29.55	0.823562	3	2621.3	0.207743	59.8285	0
	High	ETLLNSATTSLNSK	1	2	1	P50991		0	792548	0.747373	1		0	0.002805	18.96	3.77297	2	1478.77	0.309649	36.7291	0
	High	ETLLNSATTSLNSk	1	2	1	P50991	K14(Lys8)	0	156489	0.413701	1		0	0.002012	15.34	7.90837	2	1486.79	2.08813	38.7863	0
	High	GDVTITNDGATILk	1	1	1	P50991	K14(Lys8)	0	172582	0.631821	1		0.006	0.03766	18.6	3.48823	2	1425.77	2.43615	38.8231	0
P22314-2	Isoform 2 of Ubiquitin-like modifier-activating enzyme 1 OS=Homo sapiens GN=UBA1 - [UBA1_HUMAN]	213.458	8.74	2	6	6	20	788102	1.02664	12	21.4845	1018	113.728	5.60498
	A2	Sequence	# PSMs	# Proteins	# Protein Groups	Protein Group Accessions	Modifications	ΔCn	Area	Heavy/Light	Heavy/Light Count	Heavy/Light Variability [%]	q-Value	PEP	IonScore	Exp Value	Charge	MH+ [Da]	ΔM [ppm]	RT [min]	# Missed Cleavages
	High	LQTSSVLVSGLr	3	2	1	P22314-2	R12(Arg10)	0	702382	1.11738	3	0.327927	0	6.717e-05	55.98	0.000352152	2	1269.74	0.623769	40.6237	0
	High	DNPGVVTcLDEAR	2	2	1	P22314-2	C8(Carbamidomethyl)	0	812848	1.17833	1		0	2.878e-07	44.22	0.00928698	2	1445.67	0.589418	33.9299	0
	High	LQTSSVLVSGLR	2	2	1	P22314-2		0	621342				0	1.426e-05	38.23	0.0211567	2	1259.73	0.409693	38.962	0
	High	NEEDAAELVALAQAVNAR	2	2	1	P22314-2		0	358041	0.222269	2	875.784	0	1.913e-09	37.66	0.0775051	2	1883.94	-0.584705	52.9351	0
	High	YDGQVAVFGSDLQEk	1	2	1	P22314-2	K15(Lys8)	0	805125	1.24291	1		0	2.134e-05	34.08	0.145197	2	1663.81	0.327864	39.6885	0
	High	LAGTQPLEVLEAVQR	2	2	1	P22314-2		0	735127	1.09025	1		0	0.0002331	31.04	0.177282	2	1623.91	-0.444596	50.3537	0
	High	YDGQVAVFGSDLQEK	2	2	1	P22314-2		0	770828	1.55548	1		0	1.632e-05	29.13	0.437526	2	1655.79	0.57408	39.7062	0
	High	DNPGVVTcLDEAr	2	2	1	P22314-2	C8(Carbamidomethyl); R13(Arg10)	0	824054	0.884739	1		0	0.0008448	28.36	0.369591	2	1455.68	1.02649	35.9443	0
	High	LAGTQPLEVLEAVQr	2	2	1	P22314-2	R15(Arg10)	0	721327	0.861647	1		0	7.394e-05	25.37	0.568172	2	1633.92	2.19243	50.24	0
	High	ALPAVQQNNLDEDLIr	1	2	1	P22314-2	R16(Arg10)	0	714548	0.966744	1		0	0.0002253	22.52	2.02884	2	1818.96	1.58937	43.7424	0
	High	NEEDAAELVALAQAVNAr	1	2	1	P22314-2	R18(Arg10)	0	0				0	0.0002906	17.52	7.51057	2	1893.96	1.75546	53.5164	0
Q9H1E3	Nuclear ubiquitous casein and cyclin-dependent kinase substrate 1 OS=Homo sapiens GN=NUCKS1 PE=1 SV=1 - [NUCKS_HUMAN]	197.845	8.23	1	2	2	13	2.5811e+06	1.02347	7	13.0769	243	27.28	5.08447
	A2	Sequence	# PSMs	# Proteins	# Protein Groups	Protein Group Accessions	Modifications	ΔCn	Area	Heavy/Light	Heavy/Light Count	Heavy/Light Variability [%]	q-Value	PEP	IonScore	Exp Value	Charge	MH+ [Da]	ΔM [ppm]	RT [min]	# Missed Cleavages
	High	VVDYSQFQEsDDADEDYGr	3	1	1	Q9H1E3	S10(Phospho); R19(Arg10)	0	2.14807e+06	1.05058	3	8.916	0	9.24e-09	52.03	0.00127516	2	2327.89	2.0271	36.9995	0
	High	KVVDYSQFQEsDDADEDYGR	4	1	1	Q9H1E3	S11(Phospho)	0	2.49483e+06	0.837698	3	18.8466	0	0.0007396	45.91	0.00893979	2	2445.98	1.41747	34.8516	1
	High	kVVDYSQFQEsDDADEDYGr	2	1	1	Q9H1E3	K1(Lys8); S11(Phospho); R20(Arg10)	0	2.50901e+06	1.02347	1		0	0.0002104	37.93	0.0623803	3	2464	1.05199	33.9739	1
	High	VVDYSQFQEsDDADEDYGR	4	1	1	Q9H1E3	S10(Phospho)	0	2.6532e+06				0	8.49e-08	32.55	0.105983	2	2317.88	0.442209	36.1964	0
C9J9K3	40S ribosomal protein SA (Fragment) OS=Homo sapiens GN=RPSA PE=1 SV=2 - [C9J9K3_HUMAN]	197.277	14.45	4	3	3	12	1.44476e+06	0.703444	7	9.92117	263	29.386	5.24951
	A2	Sequence	# PSMs	# Proteins	# Protein Groups	Protein Group Accessions	Modifications	ΔCn	Area	Heavy/Light	Heavy/Light Count	Heavy/Light Variability [%]	q-Value	PEP	IonScore	Exp Value	Charge	MH+ [Da]	ΔM [ppm]	RT [min]	# Missed Cleavages
	High	AIVAIENPADVSVISSR	4	4	1	C9J9K3		0	1.89741e+06	0.780269	3	5.47448	0	1.153e-10	53.98	0.00107565	2	1740.95	1.19944	45.0365	0
	High	FAAATGATPIAGR	3	4	1	C9J9K3		0	1.50322e+06	0.62811	2	13.3177	0	0.0004103	42.42	0.0120946	2	1203.65	0.50508	30.8264	0
	High	AIVAIENPADVSVISSr	2	4	1	C9J9K3	R17(Arg10)	0	1.28417e+06				0	1.626e-08	41.89	0.0169293	2	1750.96	1.83818	45.1779	0
	High	FAAATGATPIAGr	2	4	1	C9J9K3	R13(Arg10)	0	951688	0.703444	1		0	4.07e-07	37.45	0.0369218	2	1213.66	0.0241988	28.4839	0
	High	LLVVTDPR	1	4	1	C9J9K3		0	933658	0.687374	1		0.004	0.03189	33.63	0.0342474	2	912.551	-0.0933703	32.1395	0
P26038	Moesin OS=Homo sapiens GN=MSN PE=1 SV=3 - [MOES_HUMAN]	189.642	7.63	1	4	4	16	1.28139e+06	0.945579	11	12.2098	577	67.7778	6.40479
	A2	Sequence	# PSMs	# Proteins	# Protein Groups	Protein Group Accessions	Modifications	ΔCn	Area	Heavy/Light	Heavy/Light Count	Heavy/Light Variability [%]	q-Value	PEP	IonScore	Exp Value	Charge	MH+ [Da]	ΔM [ppm]	RT [min]	# Missed Cleavages
	High	ISQLEMAR	2	1	1	P26038		0	940037	1.00482	2	21.5269	0	9.25e-05	55.99	0.000399933	2	947.497	-1.24496	29.1675	0
	High	ALTSELANAR	2	1	1	P26038		0	1.24643e+06	1.09336	1		0	3.085e-05	50.11	0.00151708	2	1045.56	-0.28617	31.2936	0
	High	ALTSELANAr	3	1	1	P26038	R10(Arg10)	0	1.21988e+06	0.992167	2	13.6572	0	3.304e-07	47.15	0.00324113	2	1055.57	0.671801	29.6894	0
	High	APDFVFYAPr	3	1	1	P26038	R10(Arg10)	0	978839	0.995802	2	20.034	0	2.419e-08	45.66	0.00584849	2	1192.6	0.550655	44.8931	0
	High	APDFVFYAPR	2	1	1	P26038		0	1.24629e+06	0.87267	1		0	0.0009041	45.51	0.00589093	2	1182.59	-0.297339	44.6358	0
	High	ISQLEMAr	1	1	1	P26038	R8(Arg10)	0	467792				0	0.00715	37.61	0.0281743	2	957.506	-0.497576	29.1263	0
	High	ISQLEmAR	1	1	1	P26038	M6(Oxidation)	0	1.35146e+06	0.981893	1		0	0.007622	31.51	0.106336	2	963.493	0.569248	20.3414	0
	High	IAQDLEmYGVNYFSIK	2	1	1	P26038	M7(Oxidation)	0	290597	0.944747	2	0.130449	0	6.785e-06	26.32	1.16346	2	1906.93	-0.070093	51.4391	0
Q00839-2	Isoform Short of Heterogeneous nuclear ribonucleoprotein U OS=Homo sapiens GN=HNRNPU - [HNRPU_HUMAN]	171.754	4.09	2	2	2	7	1.9061e+06	0.904309	4	20.8009	806	88.9242	5.78271
	A2	Sequence	# PSMs	# Proteins	# Protein Groups	Protein Group Accessions	Modifications	ΔCn	Area	Heavy/Light	Heavy/Light Count	Heavy/Light Variability [%]	q-Value	PEP	IonScore	Exp Value	Charge	MH+ [Da]	ΔM [ppm]	RT [min]	# Missed Cleavages
	High	NFILDQTNVSAAAQR	3	2	1	Q00839-2		0	2.22245e+06	0.980893	3	17.1821	0	4.386e-14	76.3	8.44157e-06	2	1647.85	0.615084	39.9139	0
	High	NFILDQTNVSAAAQr	3	2	1	Q00839-2	R15(Arg10)	0	1.61964e+06				0	2.041e-07	53.83	0.00145562	2	1657.86	1.73501	39.9201	0
	High	SSGPTSLFAVTVAPPGAR	1	2	1	Q00839-2		0	1.58975e+06	0.680581	1		0	0.001928	20.11	3.33788	2	1714.91	1.16795	47.5909	0
A8MVZ9	Fructose-bisphosphate aldolase OS=Homo sapiens GN=ALDOC PE=1 SV=1 - [A8MVZ9_HUMAN]	166.54	17.56	5	3	3	9	1.49433e+06	0.629931	6	19.9305	336	36.2726	7.72314
	A2	Sequence	# PSMs	# Proteins	# Protein Groups	Protein Group Accessions	Modifications	ΔCn	Area	Heavy/Light	Heavy/Light Count	Heavy/Light Variability [%]	q-Value	PEP	IonScore	Exp Value	Charge	MH+ [Da]	ΔM [ppm]	RT [min]	# Missed Cleavages
	High	GVVPLAGTDGETTTQGLDGLSEr	4	5	1	A8MVZ9	R23(Arg10)	0	2.40428e+06	0.629931	4	9.96794	0	3.656e-16	71.32	4.45879e-05	2	2283.14	1.98194	43.8246	0
	High	GVVPLAGTDGETTTQGLDGLSER	3	5	1	A8MVZ9		0	3.78985e+06	0.821571	1		0	2.605e-11	47.27	0.01164	2	2273.13	0.79525	43.8156	0
	High	YEGSGEDGGAAAQSLYIANHAY	1	2	1	A8MVZ9		0	484869				0	0.000158	17.54	8.70416	2	2243.98	-0.596121	41.8128	0
	High	GILAADESVGSmAK	1	5	1	A8MVZ9	M12(Oxidation)	0	208263	0.373154	1		0.008	0.08294	10.94	21.5278	2	1364.67	0.327552	32.2736	0
P60842	Eukaryotic initiation factor 4A-I OS=Homo sapiens GN=EIF4A1 PE=1 SV=1 - [IF4A1_HUMAN]	163.986	21.43	1	6	6	14	1.47764e+06	0.730159	8	14.2838	406	46.1246	5.47803
	A2	Sequence	# PSMs	# Proteins	# Protein Groups	Protein Group Accessions	Modifications	ΔCn	Area	Heavy/Light	Heavy/Light Count	Heavy/Light Variability [%]	q-Value	PEP	IonScore	Exp Value	Charge	MH+ [Da]	ΔM [ppm]	RT [min]	# Missed Cleavages
	High	GYDVIAQAQSGTGk	3	1	1	P60842	K14(Lys8)	0	1.09474e+06	0.985808	2	23.7415	0	6.528e-08	48.06	0.00443778	2	1402.71	0.578871	30.3612	0
	High	VLITTDLLAR	1	1	1	P60842		0	1.67663e+06	0.784064	1		0	0.0005767	40.44	0.00722016	2	1114.68	-0.16361	45.2555	0
	High	GYDVIAQAQSGTGK	3	1	1	P60842		0	1.43289e+06				0	1.794e-05	35.64	0.0750878	2	1394.69	0.522524	30.3447	0
	High	VLITTDLLAr	1	1	1	P60842	R10(Arg10)	0	1.16887e+06				0	1.423e-06	33.39	0.0363765	2	1124.69	0.0831773	45.2499	0
	High	VVmALGDYmGAScHAcIGGTNVR	1	1	1	P60842	M3(Oxidation); M9(Oxidation); C13(Carbamidomethyl); C16(Carbamidomethyl)	0	1.09874e+06	0.681834	1		0	1.721e-05	23.67	2.70565	3	2471.1	0.98018	35.6221	0
	High	GIYAYGFEKPSAIQQR	1	1	1	P60842		0	1.3234e+06	0.591273	1		0	0.002163	20.02	4.05578	3	1827.94	0.837831	37.9409	0
	High	GIYAYGFEkPSAIQQr	1	1	1	P60842	K9(Lys8); R16(Arg10)	0	663051				0	7.929e-06	15.66	10.7544	3	1845.96	-0.133035	37.947	0
	High	mFVLDEADEmLSR	1	1	1	P60842	M1(Oxidation); M10(Oxidation)	0	352553	0.768917	1		0	0.00483	14.89	8.42796	2	1587.71	1.70987	41.5058	0
	High	ATQALVLAPTR	2	1	1	P60842		0	1.21872e+06	0.669921	2	5.10081	0.001	0.01099	32.92	0.0548793	2	1140.67	0.0353152	31.6551	0
Q7Z6Z7-2	Isoform 2 of E3 ubiquitin-protein ligase HUWE1 OS=Homo sapiens GN=HUWE1 - [HUWE1_HUMAN]	159.031	1.03	3	2	2	9	3.3864e+06	0.78577	6	63.6839	4358	479.897	5.23682
	A2	Sequence	# PSMs	# Proteins	# Protein Groups	Protein Group Accessions	Modifications	ΔCn	Area	Heavy/Light	Heavy/Light Count	Heavy/Light Variability [%]	q-Value	PEP	IonScore	Exp Value	Charge	MH+ [Da]	ΔM [ppm]	RT [min]	# Missed Cleavages
	High	GSGTAsDDEFENLr	3	3	1	Q7Z6Z7-2	S6(Phospho); R14(Arg10)	0	3.27903e+06	1.14013	1		0	0.0004301	49.82	0.00126381	2	1587.62	1.40878	35.8449	0
	High	GSGTAsDDEFENLR	3	3	1	Q7Z6Z7-2	S6(Phospho)	0	3.09581e+06	1.16469	2	1.54237	0	3.45e-05	49.2	0.00143731	2	1577.61	0.855937	34.1317	0
	High	REESPmDVDQPsPSAQDTQSIASDGTPQGEK	3	3	1	Q7Z6Z7-2	M6(Oxidation); S12(Phospho)	0	3.49377e+06	0.348539	3	39.8174	0	9.507e-08	37.24	0.166795	3	3383.43	1.47652	30.7523	1
Q00610-2	Isoform 2 of Clathrin heavy chain 1 OS=Homo sapiens GN=CLTC - [CLH1_HUMAN]	152.28	3.23	3	4	4	13	2.25708e+06	0.957698	8	8.07384	1639	187.771	5.69385
	A2	Sequence	# PSMs	# Proteins	# Protein Groups	Protein Group Accessions	Modifications	ΔCn	Area	Heavy/Light	Heavy/Light Count	Heavy/Light Variability [%]	q-Value	PEP	IonScore	Exp Value	Charge	MH+ [Da]	ΔM [ppm]	RT [min]	# Missed Cleavages
	High	LASTLVHLGEYQAAVDGAR	4	3	1	Q00610-2		0	5.46975e+06	0.958151	3	0.0109808	0	1.928e-13	51.36	0.00292894	2	1971.03	0.973282	44.6425	0
	High	IYIDSNNNPER	2	3	1	Q00610-2		0	860316	0.810871	2	0.733316	0	4.517e-08	46.83	0.00464262	2	1334.63	-0.159534	27.3639	0
	High	LASTLVHLGEYQAAVDGAr	4	3	1	Q00610-2	R19(Arg10)	0	4.76665e+06	0.957316	1		0	5.214e-09	44.27	0.0150131	2	1981.04	1.6006	44.6614	0
	High	LLYNNVSNFGr	1	3	1	Q00610-2	R11(Arg10)	0	441184	1.32674	1		0	6.245e-05	31.23	0.154965	2	1306.68	1.09171	37.9386	0
	High	NNLAGAEELFAr	1	3	1	Q00610-2	R12(Arg10)	0	304205	0.88694	1		0	0.004789	12.5	14.5506	2	1314.67	0.81273	42.6723	0
	High	IYIDSNNNPEr	1	3	1	Q00610-2	R11(Arg10)	0	499609				0.001	0.009349	26.07	0.585922	2	1344.64	0.319202	27.3695	0
P31146	Coronin-1A OS=Homo sapiens GN=CORO1A PE=1 SV=4 - [COR1A_HUMAN]	151.637	14.75	1	6	6	21	2.16676e+06	0.81365	13	43.4258	461	50.9938	6.68311
	A2	Sequence	# PSMs	# Proteins	# Protein Groups	Protein Group Accessions	Modifications	ΔCn	Area	Heavy/Light	Heavy/Light Count	Heavy/Light Variability [%]	q-Value	PEP	IonScore	Exp Value	Charge	MH+ [Da]	ΔM [ppm]	RT [min]	# Missed Cleavages
	High	DAGPLLISLk	3	1	1	P31146	K10(Lys8)	0	1.27168e+06	0.699966	3	8.17311	0	9.44e-07	55.36	0.000186286	2	1034.63	0.0814694	45.3519	0
	High	AAPEASGTPSSDAVSr	3	1	1	P31146	R16(Arg10)	0	1.42068e+06				0	7.799e-07	31.77	0.182884	2	1512.72	0.314827	22.7374	0
	High	AAPEASGTPSSDAVSR	3	1	1	P31146		0	2.57814e+06	0.554176	2	14.8626	0	4.88e-08	30.97	0.221394	2	1502.71	0.377008	20.696	0
	High	VSQTTWDSGFcAVNPK	2	1	1	P31146	C11(Carbamidomethyl)	0	1.71143e+06	0.945418	1		0	4.316e-08	28.55	0.591502	2	1796.83	0.969369	41.2993	0
	High	VSQTTWDSGFcAVNPk	4	1	1	P31146	C11(Carbamidomethyl); K16(Lys8)	0	1.19356e+06	0.794034	2	3.61944	0	0.000174	27.76	0.729103	2	1804.84	1.48462	39.4338	0
	High	LQATVQELQK	1	1	1	P31146		0	406952	1.09425	1		0.002	0.01757	21.04	1.26085	2	1157.65	-0.209062	29.9659	0
	High	ILTTGFSR	1	1	1	P31146		0	1.7088e+06	1.07694	1		0.004	0.02515	22.9	0.400545	2	894.504	-0.40963	30.3417	0
	High	ILTTGFSr	3	1	1	P31146	R8(Arg10)	0	2.21072e+06	1.32333	2	0.993151	0.004	0.02443	16.75	2.33858	2	904.512	-0.302483	30.2821	0
	High	QVALWDTK	1	1	1	P31146		0	741009	0.981293	1		0.006	0.04619	21.04	1.07825	2	960.515	0.179052	36.4899	0
Q86YZ3	Hornerin OS=Homo sapiens GN=HRNR PE=1 SV=2 - [HORN_HUMAN]	151.366	11.02	1	11	11	26	5.79189e+06	0.01	25	0	2850	282.228	10.0376
	A2	Sequence	# PSMs	# Proteins	# Protein Groups	Protein Group Accessions	Modifications	ΔCn	Area	Heavy/Light	Heavy/Light Count	Heavy/Light Variability [%]	q-Value	PEP	IonScore	Exp Value	Charge	MH+ [Da]	ΔM [ppm]	RT [min]	# Missed Cleavages
	High	GSGSGQSPSSGQHGTGFGR	4	1	1	Q86YZ3		0	9.65046e+06	0.01	4	0	0	3.217e-08	57.1	0.000630677	2	1747.78	1.39589	19.8652	0
	High	QSLGHGQHGSGSGQSPSPSR	1	1	1	Q86YZ3		0	3.48951e+06	0.01	1		0	1.929e-07	31.84	0.287909	2	1947.9	0.0614493	19.0126	0
	High	QSSSYGQHESASR	3	1	1	Q86YZ3		0	1.47822e+06	0.01	3	0	0	0.001167	30.76	0.149256	3	1423.62	0.151655	14.6919	0
	High	GEQHGSSSGSSSSYGQHGSGSR	2	1	1	Q86YZ3		0	181422	0.0635111	1		0	1.565e-06	29.79	0.340944	2	2122.88	1.63334	15.5164	0
	High	QSSSYGPHGYGSGR	3	1	1	Q86YZ3		0	3.27056e+06	0.01	3	0	0	0.0005583	28.07	0.304893	2	1439.63	0.47197	21.3065	0
	High	SSSRGPYESGSGHSSGLGHQESR	3	1	1	Q86YZ3		0	4.23569e+06	0.01	3	0	0	1.219e-05	23.33	2.76619	4	2346.05	0.0518458	22.1969	1
	High	GPYESGSGHSSGLGHR	1	1	1	Q86YZ3		0	1.24411e+06	0.01	1		0	0.003262	18.15	4.42944	2	1584.72	0.694605	20.9189	0
	High	YGQQGSGSGQSPSR	2	1	1	Q86YZ3		0	832987	0.014432	2	58.6728	0	0.00114	17.88	3.1535	2	1395.63	1.32071	15.3921	0
	High	QGSSAGSSSSYGQHGSGSR	2	1	1	Q86YZ3		0	794381	0.0206956	2	74.5554	0	0.001904	17.58	4.51731	3	1783.76	-0.920469	15.1441	0
	High	SEQHGSSSGSSSSYGQHGSGSR	2	1	1	Q86YZ3		0	694009	0.0301508	2	62.6472	0	0.0006931	15.14	10.4933	2	2152.89	1.6952	15.3027	0
	High	GSGSGQSPSYGR	3	1	1	Q86YZ3		0	2.74148e+06	0.01	3	0	0	0.002126	10.22	13.0708	2	1139.51	0.629289	17.3408	0
P78559	Microtubule-associated protein 1A OS=Homo sapiens GN=MAP1A PE=1 SV=6 - [MAP1A_HUMAN]	139.115	3.71	3	5	5	11	4.17803e+06	0.593756	8	73.0766	2803	305.298	4.91943
	A2	Sequence	# PSMs	# Proteins	# Protein Groups	Protein Group Accessions	Modifications	ΔCn	Area	Heavy/Light	Heavy/Light Count	Heavy/Light Variability [%]	q-Value	PEP	IonScore	Exp Value	Charge	MH+ [Da]	ΔM [ppm]	RT [min]	# Missed Cleavages
	High	ELAPAWEDTsPEQDNR	3	3	1	P78559	S10(Phospho)	0	2.09841e+06	0.593756	2	4.62407	0	6.511e-08	53.36	0.00119158	2	1937.79	1.03224	36.0669	0
	High	ELAPAWEDTsPEQDNr	2	3	1	P78559	S10(Phospho); R16(Arg10)	0	855995	0.712772	1		0	1.504e-07	50.85	0.0021699	2	1947.8	-0.0848263	37.6714	0
	High	SPFEIIsPPAsPPEmVGQR	1	3	1	P78559	S7(Phospho); S11(Phospho); M15(Oxidation)	0	7.47873e+06	0.196364	1		0	2.009e-06	36.31	0.110685	2	2214.96	2.23382	47.2833	0
	High	VPPPRsPQAQEAPVNIDEGLTGcTIQLLPAQDK	1	3	1	P78559	S6(Phospho); C23(Carbamidomethyl)	0	2.95696e+06	0.253001	1		0	2.571e-07	35.66	0.252357	3	3619.79	1.90057	51.9606	1
	High	ELVLssPEDLTQDFEEmK	1	3	1	P78559	S5(Phospho); S6(Phospho); M17(Oxidation)	0	647467	0.306555	1		0	2.856e-05	31.12	0.230491	2	2285.92	-0.660224	54.9637	0
	High	SPFEIIsPPAsPPEmVGQr	1	3	1	P78559	S7(Phospho); S11(Phospho); M15(Oxidation); R19(Arg10)	0	1.3217e+06				0.003	0.02194	17.82	7.47348	2	2224.96	-0.724598	47.3899	0
	High	GLDsGAEtEEEkDTWEEk	1	3	1	P78559	S4(Phospho); T8(Phospho); K12(Lys8); K18(Lys8)	0	816564	1.06105	1		0.006	0.03715	22.58	1.30097	2	2228.85	1.74693	34.986	1
	High	GLDsGAEtEEEKDTWEEK	1	3	1	P78559	S4(Phospho); T8(Phospho)	0	1.07713e+06	0.802982	1		0.007	0.05937	10.53	14.122	2	2212.82	1.24304	33.4356	1
P49736	DNA replication licensing factor MCM2 OS=Homo sapiens GN=MCM2 PE=1 SV=4 - [MCM2_HUMAN]	138.847	5.2	1	4	4	17	5.25064e+06	0.788633	11	13.121	904	101.832	5.51611
	A2	Sequence	# PSMs	# Proteins	# Protein Groups	Protein Group Accessions	Modifications	ΔCn	Area	Heavy/Light	Heavy/Light Count	Heavy/Light Variability [%]	q-Value	PEP	IonScore	Exp Value	Charge	MH+ [Da]	ΔM [ppm]	RT [min]	# Missed Cleavages
	High	GLLYDsDEEDEERPAR	5	1	1	P49736	S6(Phospho)	0	3.38927e+06	0.78621	4	6.5395	0	0.0001176	59.79	0.000318064	2	1973.82	1.99692	33.0206	0
	High	GLLYDsDEEDEErPAr	4	1	1	P49736	S6(Phospho); R13(Arg10); R16(Arg10)	0	2.3642e+06	0.86641	2	0.465589	0	0.0001203	33.3	0.140087	2	1993.83	-0.0728645	32.977	0
	High	GNDPLTSsPGR	2	1	1	P49736	S8(Phospho)	0	1.09117e+07	0.743821	1		0	0.002632	32.76	0.0572566	2	1180.5	0.288995	25.0344	0
	High	GNDPLTSsPGr	2	1	1	P49736	S8(Phospho); R11(Arg10)	0	6.94134e+06	0.717468	1		0.001	0.01014	32.04	0.0729889	2	1190.51	0.210724	23.2776	0
	High	AGIVTSLQAr	1	1	1	P49736	R10(Arg10)	0	289328				0.005	0.03246	12.39	6.57225	2	1025.6	-0.0842935	33.1624	0
	High	AGIVTSLQAR	1	1	1	P49736		0	320079	1.00436	1		0.006	0.04159	19.3	1.31295	2	1015.59	-0.837597	33.1445	0
	High	TDALTssPGR	1	1	1	P49736	S6(Phospho); S7(Phospho)	0	1.23161e+06	1.50828	1		0.009	0.08777	19.6	0.634861	2	1164.43	0.187257	22.3224	0
	High	TDALTssPGr	1	1	1	P49736	S6(Phospho); S7(Phospho); R10(Arg10)	0	1.4509e+06	0.729199	1		0.009	0.08574	11.41	4.69439	2	1174.44	0.00484432	20.9757	0
F5H2R5	Rho GDP-dissociation inhibitor 2 (Fragment) OS=Homo sapiens GN=ARHGDIB PE=1 SV=1 - [F5H2R5_HUMAN]	135.18	34.09	4	2	2	7	1.47596e+06	0.727075	5	10.9379	88	9.78591	4.58936
	A2	Sequence	# PSMs	# Proteins	# Protein Groups	Protein Group Accessions	Modifications	ΔCn	Area	Heavy/Light	Heavy/Light Count	Heavy/Light Variability [%]	q-Value	PEP	IonScore	Exp Value	Charge	MH+ [Da]	ΔM [ppm]	RT [min]	# Missed Cleavages
	High	TLLGDGPVVTDPK	3	4	1	F5H2R5		0	1.51464e+06	0.727075	3	4.74165	0	3.276e-06	48.54	0.00314557	2	1311.72	-0.0225656	36.0587	0
	High	TLLGDGPVVTDPk	1	4	1	F5H2R5	K13(Lys8)	0	649103				0	0.000409	37.81	0.0341171	2	1319.73	0.780606	38.2542	0
	High	APEPHVEEDDDDELDSK	2	4	1	F5H2R5		0	1.43728e+06	0.884754	2	61.0296	0	5.668e-08	27.21	0.540572	2	1939.81	1.86281	28.4838	0
	High	APEPHVEEDDDDELDSk	1	4	1	F5H2R5	K17(Lys8)	0	599263				0	4.892e-06	21.24	2.34582	2	1947.82	1.77253	28.5523	0
F8VQ14	T-complex protein 1 subunit beta OS=Homo sapiens GN=CCT2 PE=1 SV=1 - [F8VQ14_HUMAN]	133.487	15.63	4	4	4	11	962195	0.87083	9	6.60778	416	44.7846	6.53662
	A2	Sequence	# PSMs	# Proteins	# Protein Groups	Protein Group Accessions	Modifications	ΔCn	Area	Heavy/Light	Heavy/Light Count	Heavy/Light Variability [%]	q-Value	PEP	IonScore	Exp Value	Charge	MH+ [Da]	ΔM [ppm]	RT [min]	# Missed Cleavages
	High	DASLmVTNDGATILK	2	4	1	F8VQ14	M5(Oxidation)	0	802396	0.888573	2	2.99107	0	1.918e-10	52.39	0.00196793	2	1564.79	0.753003	39.4736	0
	High	VQDDEVGDGTTSVTVLAAELLR	1	4	1	F8VQ14		0	488590	0.832911	1		0	3.517e-12	51.01	0.00446654	2	2288.16	-0.774243	61.7976	0
	High	GATQQILDEAER	3	4	1	F8VQ14		0	1.31866e+06	0.723321	3	5.63182	0	1.495e-08	40.55	0.0215945	2	1330.66	0.119045	34.4025	0
	High	EALLSSAVDHGSDEVK	3	4	1	F8VQ14		0	765531	1.00446	3	16.3882	0	1.574e-07	28.59	0.52112	2	1656.81	0.554064	35.29	0
	High	EALLSSAVDHGSDEVk	1	4	1	F8VQ14	K16(Lys8)	0	493328				0	0.00037	18.3	5.52077	2	1664.82	1.62791	35.3082	0
	High	DASLmVTNDGATILk	1	4	1	F8VQ14	M5(Oxidation); K15(Lys8)	0	628875				0	0.006727	11.21	25.6983	2	1572.81	1.34537	39.4796	0
B7ZKW8	CapZ-interacting protein OS=Homo sapiens GN=RCSD1 PE=1 SV=1 - [B7ZKW8_HUMAN]	120.459	15.8	2	4	4	14	3.45223e+06	0.305557	12	49.2369	386	41.2363	5.26221
	A2	Sequence	# PSMs	# Proteins	# Protein Groups	Protein Group Accessions	Modifications	ΔCn	Area	Heavy/Light	Heavy/Light Count	Heavy/Light Variability [%]	q-Value	PEP	IonScore	Exp Value	Charge	MH+ [Da]	ΔM [ppm]	RT [min]	# Missed Cleavages
	High	sQSDcGELGDFR	2	2	1	B7ZKW8	S1(Phospho); C5(Carbamidomethyl)	0	2.77001e+06	1.18044	2	10.7156	0	1.832e-05	49.68	0.000769134	2	1450.53	0.370318	33.7027	0
	High	sQSDcGELGDFr	2	2	1	B7ZKW8	S1(Phospho); C5(Carbamidomethyl); R12(Arg10)	0	3.16277e+06	1.20612	1		0	2.72e-07	48.69	0.0010411	2	1460.54	-0.028354	33.6511	0
	High	SSEEVDGQHPAQEEVPEsPQTSGPEAENR	4	2	1	B7ZKW8	S18(Phospho)	0	2.89405e+06	0.226789	3	34.4313	0	1.019e-06	29.02	0.875131	3	3200.32	-1.32554	27.919	0
	High	RSsEEVDGQHPAQEEVPESPQTSGPEAENR	3	2	1	B7ZKW8	S3(Phospho)	0	3.17459e+06	0.300097	3	0.126449	0	5.361e-05	27.51	1.66002	3	3356.43	1.12283	27.805	1
	High	AmVSPFHsPPSTPsSPGVR	3	2	1	B7ZKW8	M2(Oxidation); S8(Phospho); S14(Phospho)	0	4.01932e+06	0.219589	3	4.94186	0	6.04e-05	21.58	2.37073	3	2113.89	1.77338	35.9135	0
E9PK09	Bcl-2-associated transcription factor 1 (Fragment) OS=Homo sapiens GN=BCLAF1 PE=1 SV=4 - [E9PK09_HUMAN]	118.925	4.28	7	2	2	10	9.07745e+06	0.567082	6	25.9982	725	83.0857	10.1401
	A2	Sequence	# PSMs	# Proteins	# Protein Groups	Protein Group Accessions	Modifications	ΔCn	Area	Heavy/Light	Heavy/Light Count	Heavy/Light Variability [%]	q-Value	PEP	IonScore	Exp Value	Charge	MH+ [Da]	ΔM [ppm]	RT [min]	# Missed Cleavages
	High	FNDsEGDDTEETEDYr	2	7	1	E9PK09	S4(Phospho); R16(Arg10)	0	1.38293e+06	0.901001	1		0	2.264e-09	62.98	4.12619e-05	2	2011.7	0.944403	28.1285	0
	High	FNDsEGDDTEETEDYR	2	7	1	E9PK09	S4(Phospho)	0	1.76211e+06	0.766616	1		0	2.233e-08	59	9.94551e-05	2	2001.69	0.872264	28.1196	0
	High	ySPSQNsPIHHIPSr	3	7	1	E9PK09	Y1(Phospho); S7(Phospho); R15(Arg10)	0	7.68766e+06	0.530953	2	2.28435	0	2.421e-05	27.94	0.47461	3	1889.8	0.570744	28.3219	0
	High	ySPSQNsPIHHIPSR	3	7	1	E9PK09	Y1(Phospho); S7(Phospho)	0	1.63928e+07	0.509708	2	23.6097	0.001	0.0103	24.93	0.918464	2	1879.79	1.37576	29.4535	0
K7EQ48	Glucose-6-phosphate isomerase OS=Homo sapiens GN=GPI PE=1 SV=2 - [K7EQ48_HUMAN]	116.771	14.14	4	5	5	11	1.01463e+06	0.983594	8	7.53015	474	53.3682	8.67529
	A2	Sequence	# PSMs	# Proteins	# Protein Groups	Protein Group Accessions	Modifications	ΔCn	Area	Heavy/Light	Heavy/Light Count	Heavy/Light Variability [%]	q-Value	PEP	IonScore	Exp Value	Charge	MH+ [Da]	ΔM [ppm]	RT [min]	# Missed Cleavages
	High	TFTTQETITNAETAK	3	4	1	K7EQ48		0	1.51874e+06	0.983594	2	1.15711	0	4.922e-07	48.86	0.00485158	2	1655.81	1.45763	31.5674	0
	High	TFTTQETITNAETAk	3	4	1	K7EQ48	K15(Lys8)	0	1.33399e+06	1.05607	1		0	3.245e-08	46.22	0.00918233	2	1663.83	0.913693	32.4953	0
	High	HFVALSTNTTk	2	4	1	K7EQ48	K11(Lys8)	0	938051	0.985294	2	4.24426	0	0.007187	29.12	0.262986	2	1226.66	0.865084	27.9467	0
	High	VWYVSNIDGTHIAk	1	4	1	K7EQ48	K14(Lys8)	0	418726	1.11688	1		0	1.92e-05	13.27	15.7	3	1610.84	-0.0828221	39.8051	0
	High	SNTPILVDGk	1	4	1	K7EQ48	K10(Lys8)	0	587104	0.829557	1		0.002	0.01724	21.01	1.23551	2	1051.59	-0.765367	29.6169	0
	High	TLAQLNPESSLFIIASk	1	4	1	K7EQ48	K17(Lys8)	0	279623	0.434642	1		0.003	0.02328	14	8.26271	2	1840.03	1.66774	56.595	0
P36578	60S ribosomal protein L4 OS=Homo sapiens GN=RPL4 PE=1 SV=5 - [RL4_HUMAN]	112.027	11.01	2	3	3	6	1.1802e+06	0.716769	4	19.8546	427	47.6674	11.063
	A2	Sequence	# PSMs	# Proteins	# Protein Groups	Protein Group Accessions	Modifications	ΔCn	Area	Heavy/Light	Heavy/Light Count	Heavy/Light Variability [%]	q-Value	PEP	IonScore	Exp Value	Charge	MH+ [Da]	ΔM [ppm]	RT [min]	# Missed Cleavages
	High	AAAAAAALQAK	2	2	1	P36578		0	2.14157e+06	0.716769	2	14.1718	0	2.48e-07	64.7	4.09324e-05	2	956.553	0.696093	23.6801	0
	High	AAAAAAALQAk	1	2	1	P36578	K11(Lys8)	0	1.49632e+06				0	1.073e-07	54.83	0.000333456	2	964.567	-0.109289	23.6853	0
	High	QPYAVSELAGHQTSAESWGTGR	1	2	1	P36578		0	1.07384e+06	0.849706	1		0	6.003e-09	37.83	0.111152	3	2332.1	0.610427	40.6353	0
	High	QPYAVSELAGHQTSAESWGTGr	1	2	1	P36578	R22(Arg10)	0	693360				0.003	0.02108	11.62	46.4427	3	2342.11	1.19471	40.66	0
	High	IEEVPELPLVVEDK	1	1	1	P36578		0	325185	0.512657	1		0.004	0.02434	15.32	7.53507	2	1608.87	0.862726	49.5754	0
K7EMN2	6-phosphogluconate dehydrogenase, decarboxylating (Fragment) OS=Homo sapiens GN=PGD PE=1 SV=1 - [K7EMN2_HUMAN]	111.966	16.88	5	2	2	9	896378	0.884651	5	6.40343	160	17.282	8.44092
	A2	Sequence	# PSMs	# Proteins	# Protein Groups	Protein Group Accessions	Modifications	ΔCn	Area	Heavy/Light	Heavy/Light Count	Heavy/Light Variability [%]	q-Value	PEP	IonScore	Exp Value	Charge	MH+ [Da]	ΔM [ppm]	RT [min]	# Missed Cleavages
	High	GILFVGSGVSGGEEGAr	2	5	1	K7EMN2	R17(Arg10)	0	1.12506e+06	0.911738	2	6.5406	0	9.382e-10	53.51	0.00153439	2	1601.82	0.617898	41.5915	0
	High	GILFVGSGVSGGEEGAR	4	5	1	K7EMN2		0	1.27904e+06	0.884651	1		0	6.36e-11	46.44	0.00758816	2	1591.81	0.295072	41.2206	0
	High	VDDFLANEAK	2	5	1	K7EMN2		0	513712	0.940559	1		0.005	0.03223	18.22	2.72922	2	1121.55	0.670503	32.2459	0
	High	VDDFLANEAk	1	5	1	K7EMN2	K10(Lys8)	0	210703	0.847293	1		0.006	0.03565	14.89	5.46674	2	1129.56	-0.557398	34.7291	0
F8VV32	Lysozyme C OS=Homo sapiens GN=LYZ PE=1 SV=1 - [F8VV32_HUMAN]	111.18	20.19	3	2	2	5	1.49805e+06	0.01	5	0	104	11.4807	9.0708
	A2	Sequence	# PSMs	# Proteins	# Protein Groups	Protein Group Accessions	Modifications	ΔCn	Area	Heavy/Light	Heavy/Light Count	Heavy/Light Variability [%]	q-Value	PEP	IonScore	Exp Value	Charge	MH+ [Da]	ΔM [ppm]	RT [min]	# Missed Cleavages
	High	STDYGIFQINSR	3	3	1	F8VV32		0	1.69675e+06	0.01	3	0	0	2.096e-08	51.98	0.00170416	2	1400.68	0.230196	42.5372	0
	High	ATNYNAGDRSTDYGIFQINSR	2	3	1	F8VV32		0	1.29935e+06	0.013004	2	14.9794	0	1.723e-06	23.29	3.19262	3	2363.1	0.989141	40.5888	1
E7EMC6	Annexin OS=Homo sapiens GN=ANXA6 PE=1 SV=1 - [E7EMC6_HUMAN]	111.02	9.39	3	2	2	5	463297	1.19412	3	2.83608	330	36.9397	5.90967
	A2	Sequence	# PSMs	# Proteins	# Protein Groups	Protein Group Accessions	Modifications	ΔCn	Area	Heavy/Light	Heavy/Light Count	Heavy/Light Variability [%]	q-Value	PEP	IonScore	Exp Value	Charge	MH+ [Da]	ΔM [ppm]	RT [min]	# Missed Cleavages
	High	DAFVAIVQSVk	2	3	1	E7EMC6	K11(Lys8)	0	661044	1.20559	2	1.41783	0	2.157e-05	60.19	0.000140037	2	1184.68	-0.720469	46.5425	0
	High	EDAQVAAEILEIADTPSGDK	1	3	1	E7EMC6		0	265550	0.986768	1		0	3.112e-09	40.14	0.0522676	2	2072.01	1.35409	53.2683	0
	High	DAFVAIVQSVK	1	3	1	E7EMC6		0	615093				0	3.149e-06	40.12	0.0174949	2	1176.66	0.241322	46.753	0
	High	EDAQVAAEILEIADTPSGDk	1	3	1	E7EMC6	K20(Lys8)	0	257229				0	0.0001246	22.12	3.31769	2	2080.02	1.33019	53.2619	0
P31025	Lipocalin-1 OS=Homo sapiens GN=LCN1 PE=1 SV=1 - [LCN1_HUMAN]	106.436	12.5	1	2	2	6	1.00638e+07	0.0118109	6	9.07435	176	19.2378	5.57959
	A2	Sequence	# PSMs	# Proteins	# Protein Groups	Protein Group Accessions	Modifications	ΔCn	Area	Heavy/Light	Heavy/Light Count	Heavy/Light Variability [%]	q-Value	PEP	IonScore	Exp Value	Charge	MH+ [Da]	ΔM [ppm]	RT [min]	# Missed Cleavages
	High	GLSTESILIPR	3	1	1	P31025		0	1.93859e+07	0.01	3	0	0	1.939e-06	62.97	8.24112e-05	2	1185.68	0.362997	43.8374	0
	High	NNLEALEDFEK	3	1	1	P31025		0	741650	0.0140875	3	17.2024	0	0.00378	25.42	0.641763	2	1321.63	1.40172	42.4777	0
P17987	T-complex protein 1 subunit alpha OS=Homo sapiens GN=TCP1 PE=1 SV=1 - [TCPA_HUMAN]	105.555	23.02	1	10	10	18	1.11873e+06	0.763926	12	20.6799	556	60.3056	6.11279
	A2	Sequence	# PSMs	# Proteins	# Protein Groups	Protein Group Accessions	Modifications	ΔCn	Area	Heavy/Light	Heavy/Light Count	Heavy/Light Variability [%]	q-Value	PEP	IonScore	Exp Value	Charge	MH+ [Da]	ΔM [ppm]	RT [min]	# Missed Cleavages
	High	mLVDDIGDVTITNDGATILK	2	1	1	P17987	M1(Oxidation)	0	455815	0.931051	2	11.9387	0	1.366e-08	37.47	0.0900406	2	2120.08	0.990588	50.7902	0
	High	HGSYEDAVHsGALND	1	1	1	P17987	S10(Phospho)	0	781465				0	0.001293	29.66	0.137234	2	1651.64	1.18437	29.3732	0
	High	EQLAIAEFAR	2	1	1	P17987		0	1.51417e+06	0.767747	2	1.91903	0	0.007023	29.07	0.236858	2	1147.61	0.303424	42.0563	0
	High	EQLAIAEFAr	1	1	1	P17987	R10(Arg10)	0	537982	1.06767	1		0	0.005388	29.05	0.243676	2	1157.62	0.222805	43.5758	0
	High	SLLVIPNTLAVNAAQDSTDLVAk	2	1	1	P17987	K23(Lys8)	0	244076	0.651984	1		0	0.0002815	25.75	0.49423	2	2361.31	1.42239	57.5598	0
	High	mLVDDIGDVTITNDGATILk	2	1	1	P17987	M1(Oxidation); K20(Lys8)	0	352498				0	1.048e-05	25.02	1.3858	2	2128.1	3.95138	50.7536	0
	High	SQNVmAAASIANIVK	1	1	1	P17987	M5(Oxidation)	0	1.03486e+06	0.558743	1		0	0.0003341	21.81	1.84371	2	1532.81	1.85905	40.1591	0
	High	SLLVIPNTLAVNAAQDSTDLVAK	2	1	1	P17987		0	377697				0	0.0003906	20.61	2.0325	2	2353.3	-0.423654	57.5794	0
	High	DDKHGSYEDAVHSGALND	1	1	1	P17987		0	807168	0.491686	1		0	0.001327	19.96	3.07418	2	1929.82	0.990907	29.1315	1
	High	SSLGPVGLDK	1	1	1	P17987		0	725138	0.735544	1		0.001	0.01459	20.07	1.22509	2	972.536	0.154386	30.4756	0
	High	YPVNSVNILk	1	1	1	P17987	K10(Lys8)	0	504485	0.770026	1		0.001	0.01309	15.16	4.04151	2	1154.67	0.0804767	39.7787	0
	High	QAGVFEPTIVK	1	1	1	P17987		0	616024	0.72187	1		0.004	0.02874	29.98	0.176662	2	1188.66	0.546972	38.8428	0
	High	YFVEAGAmAVr	1	1	1	P17987	M8(Oxidation); R11(Arg10)	0	541382	1.07156	1		0.007	0.0608	13.23	10.3005	2	1239.61	-0.0325252	32.3271	0
P40227	T-complex protein 1 subunit zeta OS=Homo sapiens GN=CCT6A PE=1 SV=3 - [TCPZ_HUMAN]	98.6814	11.3	1	4	4	12	808396	0.846481	7	9.04694	531	57.9876	6.68311
	A2	Sequence	# PSMs	# Proteins	# Protein Groups	Protein Group Accessions	Modifications	ΔCn	Area	Heavy/Light	Heavy/Light Count	Heavy/Light Variability [%]	q-Value	PEP	IonScore	Exp Value	Charge	MH+ [Da]	ΔM [ppm]	RT [min]	# Missed Cleavages
	High	VLAQNSGFDLQETLVk	4	1	1	P40227	K16(Lys8)	0	958133	0.844617	2	0.326865	0	1.621e-06	41.93	0.0210445	2	1769.95	1.25265	46.8485	0
	High	VLAQNSGFDLQETLVK	2	1	1	P40227		0	1.11857e+06	0.899631	1		0	1.225e-08	34.77	0.110981	2	1761.94	2.25034	46.8801	0
	High	VATAQDDITGDGTTSNVLIIGELLk	1	1	1	P40227	K25(Lys8)	0	65134.6	0.592909	1		0	3.584e-06	23.3	1.87117	2	2552.36	1.20803	60.0332	0
	High	IITEGFEAAk	2	1	1	P40227	K10(Lys8)	0	808164	0.883916	2	7.38935	0	0.0007999	19.88	1.75996	2	1086.59	0.158712	33.4132	0
	High	VATAQDDITGDGTTSNVLIIGELLK	2	1	1	P40227		0	498450				0	0.0004672	12.3	26.7629	2	2544.34	-1.45963	60.0205	0
	High	GLVLDHGAr	1	1	1	P40227	R9(Arg10)	0	370858	1.50284	1		0.005	0.0324	20.04	1.09338	2	947.53	0.00040599	25.305	0
E5RGH4	Heterogeneous nuclear ribonucleoprotein H (Fragment) OS=Homo sapiens GN=HNRNPH1 PE=1 SV=1 - [E5RGH4_HUMAN]	96.62	33	8	2	2	9	1.32202e+06	0.791106	5	21.8547	100	11.1737	6.78564
	A2	Sequence	# PSMs	# Proteins	# Protein Groups	Protein Group Accessions	Modifications	ΔCn	Area	Heavy/Light	Heavy/Light Count	Heavy/Light Variability [%]	q-Value	PEP	IonScore	Exp Value	Charge	MH+ [Da]	ΔM [ppm]	RT [min]	# Missed Cleavages
	High	STGEAFVQFASQEIAEK	3	8	1	E5RGH4		0	563687	0.915183	1		0	2.971e-09	51.04	0.00358145	2	1841.89	1.18092	50.6122	0
	High	STGEAFVQFASQEIAEk	2	8	1	E5RGH4	K17(Lys8)	0	445100	0.880906	1		0	1.407e-08	40.99	0.038355	2	1849.91	0.758882	50.5823	0
	High	HTGPNsPDTANDGFVr	1	8	1	E5RGH4	S6(Phospho); R16(Arg10)	0	1.38677e+06	0.791106	1		0	2.985e-05	22.07	1.47767	2	1774.74	0.097929	28.1054	0
	High	HTGPNsPDTANDGFVR	3	8	1	E5RGH4	S6(Phospho)	0	2.08036e+06	0.632903	2	1.9685	0	0.001858	20.41	2.24703	2	1764.74	1.60226	25.7542	0
B1AHC9	X-ray repair cross-complementing protein 6 OS=Homo sapiens GN=XRCC6 PE=1 SV=1 - [B1AHC9_HUMAN]	93.66	4.65	2	2	2	4	682636	0.751234	3	2.38723	559	64.243	9.27588
	A2	Sequence	# PSMs	# Proteins	# Protein Groups	Protein Group Accessions	Modifications	ΔCn	Area	Heavy/Light	Heavy/Light Count	Heavy/Light Variability [%]	q-Value	PEP	IonScore	Exp Value	Charge	MH+ [Da]	ΔM [ppm]	RT [min]	# Missed Cleavages
	High	DIISIAEDEDLr	1	2	1	B1AHC9	R12(Arg10)	0	450133	0.751234	1		0	1.341e-11	59.99	0.000283352	2	1398.7	0.484821	46.5459	0
	High	NIYVLQELDNPGAK	2	2	1	B1AHC9		0	680471	0.723724	2	7.93035	0	6.224e-09	41.77	0.019589	2	1573.82	1.29174	46.4367	0
	High	DIISIAEDEDLR	1	2	1	B1AHC9		0	684801				0	5.303e-05	37.39	0.0493273	2	1388.69	0.377526	46.5752	0
H3BRV0	Eukaryotic translation initiation factor 3 subunit C OS=Homo sapiens GN=EIF3C PE=1 SV=1 - [H3BRV0_HUMAN]	93.31	9.3	3	5	5	9	3.22085e+06	0.168881	9	43.2127	903	104.036	5.63037
	A2	Sequence	# PSMs	# Proteins	# Protein Groups	Protein Group Accessions	Modifications	ΔCn	Area	Heavy/Light	Heavy/Light Count	Heavy/Light Variability [%]	q-Value	PEP	IonScore	Exp Value	Charge	MH+ [Da]	ΔM [ppm]	RT [min]	# Missed Cleavages
	High	SEQDQAENEGEDSAVLmER	5	3	1	H3BRV0	M17(Oxidation)	0	7.52229e+06	0.138657	5	71.9799	0	1.236e-10	44.6	0.012082	3	2152.9	3.24287	30.9886	0
	High	DLmLmSHLQDNIQHADPPVQILYNR	1	3	1	H3BRV0	M3(Oxidation); M5(Oxidation)	0	1.17858e+06	0.0135191	1		0	8.051e-05	23.53	3.82679	4	2993.47	2.01384	48.8165	0
	High	DAHNALLDIQSSGR	1	3	1	H3BRV0		0	447801	0.265393	1		0	0.0002106	22.26	1.8738	2	1496.75	0.914203	36.2237	0
	High	TEPTAQQNLALQLAEK	1	3	1	H3BRV0		0	961683	0.168881	1		0.001	0.01104	13.37	15.6119	2	1754.93	0.423634	39.4953	0
	High	LGSLVENNER	1	3	1	H3BRV0		0	797913	0.223247	1		0.003	0.02376	17.06	3.4684	2	1130.58	-0.284621	27.0551	0
P07737	Profilin-1 OS=Homo sapiens GN=PFN1 PE=1 SV=2 - [PROF1_HUMAN]	91.99	31.43	1	3	3	11	1.21787e+06	0.907111	6	10.4302	140	15.0446	8.26514
	A2	Sequence	# PSMs	# Proteins	# Protein Groups	Protein Group Accessions	Modifications	ΔCn	Area	Heavy/Light	Heavy/Light Count	Heavy/Light Variability [%]	q-Value	PEP	IonScore	Exp Value	Charge	MH+ [Da]	ΔM [ppm]	RT [min]	# Missed Cleavages
	High	STGGAPTFNVTVTk	3	1	1	P07737	K14(Lys8)	0	1.64308e+06	0.896224	3	8.71154	0	0.0008843	45.66	0.00688074	2	1387.73	0.513508	35.8632	0
	High	DSLLQDGEFSmDLR	2	1	1	P07737	M11(Oxidation)	0	892695	0.814664	2	30.512	0	8.974e-07	33.64	0.128046	2	1641.75	1.65711	45.2853	0
	High	STGGAPTFNVTVTK	3	1	1	P07737		0	2.13653e+06				0	0.004254	30.52	0.233987	2	1379.72	0.544644	35.8689	0
	High	TFVNITPAEVGVLVGk	1	1	1	P07737	K16(Lys8)	0	515945	0.91813	1		0	0.008621	16.75	2.91767	2	1651.95	1.11147	54.975	0
	High	DSLLQDGEFSmDLr	1	1	1	P07737	M11(Oxidation); R14(Arg10)	0	800425				0.001	0.009636	16.31	6.90659	2	1651.75	0.11434	45.2611	0
	High	TFVNITPAEVGVLVGK	1	1	1	P07737		0	624391				0.001	0.01359	16.17	4.10387	2	1643.94	-0.715859	55.0168	0
P62805	Histone H4 OS=Homo sapiens GN=HIST1H4A PE=1 SV=2 - [H4_HUMAN]	91.0557	21.36	1	2	2	8	1.54417e+06	0.773267	5	8.68082	103	11.3604	11.356
	A2	Sequence	# PSMs	# Proteins	# Protein Groups	Protein Group Accessions	Modifications	ΔCn	Area	Heavy/Light	Heavy/Light Count	Heavy/Light Variability [%]	q-Value	PEP	IonScore	Exp Value	Charge	MH+ [Da]	ΔM [ppm]	RT [min]	# Missed Cleavages
	High	ISGLIYEETR	3	1	1	P62805		0	1.71288e+06	0.815949	3	0.698788	0	1.488e-06	49.39	0.00221644	2	1180.62	0.538919	36.8085	0
	High	ISGLIYEETr	3	1	1	P62805	R10(Arg10)	0	1.26381e+06				0	3.144e-06	36.79	0.0399975	2	1190.63	0.35603	36.8139	0
	High	DNIQGITKPAIR	2	1	1	P62805		0	1.37545e+06	0.01	2	0	0	0.001146	26.9	0.348831	2	1325.75	0.604056	29.3645	0
F8WBS8	26S proteasome non-ATPase regulatory subunit 2 OS=Homo sapiens GN=PSMD2 PE=1 SV=1 - [F8WBS8_HUMAN]	88.1744	42.37	3	2	2	13	1.24384e+07	0.37852	8	8.70728	59	6.57933	9.40771
	A2	Sequence	# PSMs	# Proteins	# Protein Groups	Protein Group Accessions	Modifications	ΔCn	Area	Heavy/Light	Heavy/Light Count	Heavy/Light Variability [%]	q-Value	PEP	IonScore	Exp Value	Charge	MH+ [Da]	ΔM [ppm]	RT [min]	# Missed Cleavages
	High	DKAPVQPQQsPAAAPGGTDEKPSGK	4	3	1	F8WBS8	S10(Phospho)	0	1.36566e+07	0.387276	4	9.53523	0	2.223e-11	48.41	0.0114583	3	2541.2	0.813867	21.5952	1
	High	APVQPQQsPAAAPGGTDEkPSGk	3	3	1	F8WBS8	S8(Phospho); K19(Lys8); K23(Lys8)	0	3.58386e+06	0.373136	2	5.87497	0	6.12e-08	33.81	0.267514	3	2314.11	0.689709	22.6643	0
	High	DkAPVQPQQsPAAAPGGTDEkPSGk	2	3	1	F8WBS8	K2(Lys8); S10(Phospho); K21(Lys8); K25(Lys8)	0	3200395				0	1.405e-06	31.89	0.491505	3	2565.24	0.403916	22.6138	1
	High	APVQPQQsPAAAPGGTDEKPSGK	4	3	1	F8WBS8	S8(Phospho)	0	1.12201e+07	0.365247	2	7.91102	0	9.895e-10	28.01	0.993024	3	2298.08	0.728325	22.6454	0
D6RAF8	Heterogeneous nuclear ribonucleoprotein D0 (Fragment) OS=Homo sapiens GN=HNRNPD PE=1 SV=1 - [D6RAF8_HUMAN]	84.28	14.48	3	2	2	9	4.73441e+06	0.707837	6	27.8417	221	23.0622	5.10986
	A2	Sequence	# PSMs	# Proteins	# Protein Groups	Protein Group Accessions	Modifications	ΔCn	Area	Heavy/Light	Heavy/Light Count	Heavy/Light Variability [%]	q-Value	PEP	IonScore	Exp Value	Charge	MH+ [Da]	ΔM [ppm]	RT [min]	# Missed Cleavages
	High	IDASkNEEDEGHSNsSPr	1	3	1	D6RAF8	K5(Lys8); S15(Phospho); R18(Arg10)	0	2.5121e+06	0.844015	1		0	0.006521	36.03	0.0807625	2	2069.85	0.274794	16.6892	1
	High	IFVGGLSPDTPEEK	3	3	1	D6RAF8		0	1.55457e+06	0.576816	3	7.7789	0	1.157e-05	33.1	0.151733	2	1488.76	0.965759	38.2802	0
	High	IDASKNEEDEGHsNSSPR	3	3	1	D6RAF8	S13(Phospho)	0	7.91425e+06	0.828186	2	5.28323	0	0.0001474	30.65	0.240863	2	2051.83	-0.195297	14.9644	1
	High	IFVGGLSPDTPEEk	2	3	1	D6RAF8	K14(Lys8)	0	877115				0	0.001384	19.75	3.22755	2	1496.77	1.01619	37.7521	0
B0YJC4	Vimentin OS=Homo sapiens GN=VIM PE=1 SV=1 - [B0YJC4_HUMAN]	83.51	12.53	2	4	4	7	583084	0.522365	5	14.046	431	49.6231	5.24951
	A2	Sequence	# PSMs	# Proteins	# Protein Groups	Protein Group Accessions	Modifications	ΔCn	Area	Heavy/Light	Heavy/Light Count	Heavy/Light Variability [%]	q-Value	PEP	IonScore	Exp Value	Charge	MH+ [Da]	ΔM [ppm]	RT [min]	# Missed Cleavages
	High	SLYASSPGGVYATR	1	2	1	B0YJC4		0	481870	0.694071	1		0	4.514e-08	49.74	0.00305609	2	1428.71	0.276124	33.9063	0
	High	EmEENFAVEAANYQDTIGR	1	2	1	B0YJC4	M2(Oxidation)	0	689350	0.522365	1		0	5.681e-08	45.28	0.0151029	2	2202.97	2.80636	43.2155	0
	High	FADLSEAANR	1	2	1	B0YJC4		0	405648	0.475368	1		0	0.00077	24.64	0.579926	2	1093.53	0.510577	30.6074	0
	High	FADLSEAANr	1	2	1	B0YJC4	R10(Arg10)	0	120860				0	0.00823	15.57	4.59539	2	1103.54	-0.0183413	30.6506	0
	High	EEAENTLQSFR	2	2	1	B0YJC4		0	578032	0.794955	2	83.4332	0.001	0.01151	22.35	1.23464	2	1323.62	-0.453562	31.8877	0
	High	SLYASSPGGVYATr	1	2	1	B0YJC4	R14(Arg10)	0	301007				0.003	0.02249	16.19	7.42227	2	1438.72	-1.23094	33.918	0
Q5SZU1	D-3-phosphoglycerate dehydrogenase OS=Homo sapiens GN=PHGDH PE=1 SV=1 - [Q5SZU1_HUMAN]	81.4732	10.02	1	4	4	7	564320	0.674992	7	9.34212	499	53.0514	6.91748
	A2	Sequence	# PSMs	# Proteins	# Protein Groups	Protein Group Accessions	Modifications	ΔCn	Area	Heavy/Light	Heavy/Light Count	Heavy/Light Variability [%]	q-Value	PEP	IonScore	Exp Value	Charge	MH+ [Da]	ΔM [ppm]	RT [min]	# Missed Cleavages
	High	GGIVDEGALLr	1	1	1	Q5SZU1	R11(Arg10)	0	280460	0.947648	1		0	1.953e-05	52.51	0.000936109	2	1109.62	0.443453	38.8105	0
	High	VTADVINAAEK	1	1	1	Q5SZU1		0	402526	0.515169	1		0	0.0001449	35.64	0.051987	2	1130.6	-0.404538	29.9605	0
	High	AGTGVDNVDLEAATR	3	1	1	Q5SZU1		0	671612	0.674992	3	3.36164	0	2.333e-07	32.52	0.160175	2	1488.73	-0.103401	33.4312	0
	High	GGIVDEGALLR	1	1	1	Q5SZU1		0	292687	1.24304	1		0	0.003056	29.84	0.16616	2	1099.61	1.4177	40.8622	0
	High	GTIQVITQGTSLK	1	1	1	Q5SZU1		0	618821	0.633858	1		0.004	0.03136	10.96	12.8188	2	1345.77	1.98885	37.1164	0
P08779	Keratin, type I cytoskeletal 16 OS=Homo sapiens GN=KRT16 PE=1 SV=4 - [K1C16_HUMAN]	75.6846	18.82	1	4	7	12	3.77974e+06	0.01	12	0	473	51.2362	5.04639
	A2	Sequence	# PSMs	# Proteins	# Protein Groups	Protein Group Accessions	Modifications	ΔCn	Area	Heavy/Light	Heavy/Light Count	Heavy/Light Variability [%]	q-Value	PEP	IonScore	Exp Value	Charge	MH+ [Da]	ΔM [ppm]	RT [min]	# Missed Cleavages
	High	APSTYGGGLSVSSR	3	1	1	P08779		0	1.21367e+06	0.01	3	0	0	3.7e-07	38.89	0.0337525	2	1338.67	0.98157	27.8504	0
	High	QTRPILKEQSSSSFSQGQSS	3	1	1	P08779		0	6.43713e+06	0.01	3	0	0	1.456e-05	28.67	0.812815	3	2182.07	0.577853	26.1178	1
	High	GQTGGDVNVEmDAAPGVDLSR	1	1	1	P08779	M11(Oxidation)	0	956185	0.0131655	1		0	4.008e-05	22.78	2.62692	2	2103.96	1.49088	36.6294	0
	High	VTmQNLNDR	1	2	2	P08779;P13645	M3(Oxidation)	0	65946.2	0.0977375	1		0	0.003088	16.16	4.14843	2	1106.53	-0.450126	18.6473	0
	High	LASYLDKVR	1	2	2	P08779;P13645		0	857840	0.01	1		0.001	0.01386	16.61	2.77971	2	1064.61	-0.115057	29.2108	1
	High	VLDELTLAR	1	1	1	P08779		0	457631	0.0151973	1		0.002	0.01642	31.2	0.0908776	2	1029.59	0.0975524	38.0687	0
	High	LAADDFR	2	2	2	P08779;P13645		0	3.68841e+06	0.01	2	0	0.007	0.06954	34.49	0.0350652	2	807.4	0.21741	28.5854	0
H0YKH0	Transducin-like enhancer protein 3 OS=Homo sapiens GN=TLE3 PE=4 SV=1 - [H0YKH0_HUMAN]	68.86	7.64	15	2	2	10	2.97186e+06	0.791141	6	27.1779	445	47.7316	7.38623
	A2	Sequence	# PSMs	# Proteins	# Protein Groups	Protein Group Accessions	Modifications	ΔCn	Area	Heavy/Light	Heavy/Light Count	Heavy/Light Variability [%]	q-Value	PEP	IonScore	Exp Value	Charge	MH+ [Da]	ΔM [ppm]	RT [min]	# Missed Cleavages
	High	DAPTsPASVASSSSTPSSK	3	15	1	H0YKH0	S5(Phospho)	0	1.9779e+06	0.585721	2	3.00739	0	9.37e-08	36.33	0.077409	2	1843.8	1.28051	26.6639	0
	High	ESSANNSVsPSESLR	3	15	1	H0YKH0	S9(Phospho)	0	3.96583e+06	0.935237	3	3.77682	0	5.045e-08	35.61	0.0569638	2	1643.69	1.07213	26.7043	0
	High	ESSANNSVSPsESLr	3	15	1	H0YKH0	S11(Phospho); R15(Arg10)	0	3.42419e+06				0	0.0003683	28.52	0.288099	2	1653.7	0.0514294	26.7164	0
	High	DAPTsPASVASSSSTPSSk	1	15	1	H0YKH0	S5(Phospho); K19(Lys8)	0	1.28782e+06	0.723449	1		0	0.004331	21.04	2.80621	2	1851.81	1.25399	25.5025	0
O95218-2	Isoform 2 of Zinc finger Ran-binding domain-containing protein 2 OS=Homo sapiens GN=ZRANB2 - [ZRAB2_HUMAN]	68.069	4.38	3	2	2	6	2.03136e+06	0.771144	5	7.55924	320	36.2965	9.75928
	A2	Sequence	# PSMs	# Proteins	# Protein Groups	Protein Group Accessions	Modifications	ΔCn	Area	Heavy/Light	Heavy/Light Count	Heavy/Light Variability [%]	q-Value	PEP	IonScore	Exp Value	Charge	MH+ [Da]	ΔM [ppm]	RT [min]	# Missed Cleavages
	High	YNLDAsEEEDSNK	3	3	1	O95218-2	S6(Phospho)	0	3.05421e+06	0.740785	3	6.82528	0	3.959e-06	48.65	0.0013871	2	1593.6	1.29602	25.9758	0
	High	YNLDAsEEEDSNk	1	3	1	O95218-2	S6(Phospho); K13(Lys8)	0	1.25843e+06				0	0.001231	26.74	0.248272	2	1601.61	1.26528	27.6433	0
	High	YNLDAsEEEDSNKK	2	3	1	O95218-2	S6(Phospho)	0	1.0085e+06	0.836165	2	12.0451	0.006	0.05418	11.05	13.2823	2	1721.69	0.703697	23.5167	1
A0A087WYC1	Heat shock 70 kDa protein 4 OS=Homo sapiens GN=HSPA4 PE=1 SV=1 - [A0A087WYC1_HUMAN]	67.7098	5.01	2	2	2	11	1.07598e+06	0.733147	6	30.9063	699	78.5562	5.17334
	A2	Sequence	# PSMs	# Proteins	# Protein Groups	Protein Group Accessions	Modifications	ΔCn	Area	Heavy/Light	Heavy/Light Count	Heavy/Light Variability [%]	q-Value	PEP	IonScore	Exp Value	Charge	MH+ [Da]	ΔM [ppm]	RT [min]	# Missed Cleavages
	High	VLATAFDTTLGGR	4	2	1	A0A087WYC1		0	657112	0.91673	2	0.428054	0	3.641e-09	44.95	0.00709035	2	1321.71	1.01281	41.2181	0
	High	VLATAFDTTLGGr	4	2	1	A0A087WYC1	R13(Arg10)	0	540592	0.758308	1		0	1.245e-05	41.5	0.0158544	2	1331.72	-0.437556	40.8731	0
	High	mQVDQEEPHVEEQQQQTPAENK	3	2	1	A0A087WYC1	M1(Oxidation)	0	1.49484e+06	0.608184	3	21.7281	0	7.44e-09	23.02	3.62564	3	2638.17	0.924654	23.8594	0
P46379-5	Isoform 5 of Large proline-rich protein BAG6 OS=Homo sapiens GN=BAG6 - [BAG6_HUMAN]	66.97	6.96	4	3	3	10	5.37598e+06	0.462579	10	23.5703	1077	113.385	5.69385
	A2	Sequence	# PSMs	# Proteins	# Protein Groups	Protein Group Accessions	Modifications	ΔCn	Area	Heavy/Light	Heavy/Light Count	Heavy/Light Variability [%]	q-Value	PEP	IonScore	Exp Value	Charge	MH+ [Da]	ΔM [ppm]	RT [min]	# Missed Cleavages
	High	ENAsPAPGTTAEEAmSR	3	4	1	P46379-5	S4(Phospho); M15(Oxidation)	0	1.86022e+06	0.612489	3	1.78517	0	2.959e-07	43.5	0.00860759	2	1814.73	0.548413	23.1041	0
	High	VGDPPQPLPEEPmEVQGAERAsPEPQR	2	4	1	P46379-5	M13(Oxidation); S22(Phospho)	0	1.70928e+06	0.0173457	2	59.4357	0	0.002602	27.53	1.72436	3	3036.38	1.79593	34.5514	1
	High	APPQTHLPSGASSGTGSASATHGGGSPPGtr	2	4	1	P46379-5	T30(Phospho); R31(Arg10)	0	5.26773e+06	0.462579	2	2.66697	0	9.197e-11	27.13	1.71383	4	2875.3	0.817058	27.0731	0
	High	APPQTHLPSGASSGTGSASATHGGGsPPGTR	3	4	1	P46379-5	S26(Phospho)	0	1.25585e+07	0.454279	3	0.549643	0	3.986e-05	16.23	20.5701	3	2865.3	3.07147	26.8942	0
P61978-3	Isoform 3 of Heterogeneous nuclear ribonucleoprotein K OS=Homo sapiens GN=HNRNPK - [HNRPK_HUMAN]	65.01	13.41	3	3	3	7	1.04853e+06	0.72758	6	16.0129	440	48.5322	5.5415
	A2	Sequence	# PSMs	# Proteins	# Protein Groups	Protein Group Accessions	Modifications	ΔCn	Area	Heavy/Light	Heavy/Light Count	Heavy/Light Variability [%]	q-Value	PEP	IonScore	Exp Value	Charge	MH+ [Da]	ΔM [ppm]	RT [min]	# Missed Cleavages
	High	GSYGDLGGPIITTQVTIPK	2	3	1	P61978-3		0	814747	0.72047	2	3.40675	0	2.673e-10	36.4	0.0743501	2	1917.03	-0.0463516	49.0238	0
	High	TDYNASVSVPDSSGPER	2	3	1	P61978-3		0	797015	0.581766	2	31.985	0	4.317e-05	31.47	0.247075	2	1780.8	1.24971	31.0456	0
	High	IITITGTQDQIQNAQYLLQNSVk	2	3	1	P61978-3	K23(Lys8)	0	1.53383e+06	1.02584	1		0	5.053e-11	31.39	0.221462	3	2597.4	0.548439	55.6624	0
	High	IITITGTQDQIQNAQYLLQNSVK	1	3	1	P61978-3		0	354594	0.872688	1		0	0.0002399	25.84	0.840485	2	2589.4	2.78602	55.7073	0
E9PS34	Nucleosome assembly protein 1-like 4 (Fragment) OS=Homo sapiens GN=NAP1L4 PE=1 SV=1 - [E9PS34_HUMAN]	61.87	26.32	8	2	2	8	4.26904e+06	0.75791	5	10.8963	133	15.2726	5.12256
	A2	Sequence	# PSMs	# Proteins	# Protein Groups	Protein Group Accessions	Modifications	ΔCn	Area	Heavy/Light	Heavy/Light Count	Heavy/Light Variability [%]	q-Value	PEP	IonScore	Exp Value	Charge	MH+ [Da]	ΔM [ppm]	RT [min]	# Missed Cleavages
	High	EFITGDVEPTDAEsEWHSENEEEEK	3	8	1	E9PS34	S14(Phospho)	0	8.05171e+06	0.730644	2	5.43609	0	8.856e-07	39.21	0.055063	3	3016.19	1.19785	42.538	0
	High	EFITGDVEPTDAESEWHsENEEEEk	3	8	1	E9PS34	S18(Phospho); K25(Lys8)	0	5022958	0.745662	1		0	0.0002072	38.07	0.0825627	3	3024.21	1.96894	41.5851	0
	High	FYEEVHDLER	1	8	1	E9PS34		0	373615	1.07423	1		0	0.0001826	19.93	2.19154	2	1336.62	0.104486	32.2478	0
	High	FYEEVHDLEr	1	8	1	E9PS34	R10(Arg10)	0	486368	0.974481	1		0.004	0.03114	22.37	1.29328	2	1346.63	2.66548	33.8643	0
B4E135	DNA ligase 1 OS=Homo sapiens GN=LIG1 PE=1 SV=1 - [B4E135_HUMAN]	58.59	11.81	5	3	3	10	2.35679e+06	0.533881	6	17.1788	415	44.998	8.60205
	A2	Sequence	# PSMs	# Proteins	# Protein Groups	Protein Group Accessions	Modifications	ΔCn	Area	Heavy/Light	Heavy/Light Count	Heavy/Light Variability [%]	q-Value	PEP	IonScore	Exp Value	Charge	MH+ [Da]	ΔM [ppm]	RT [min]	# Missed Cleavages
	High	VLGsEGEEEDEALsPAK	3	5	1	B4E135	S4(Phospho); S14(Phospho)	0	4.38592e+06	0.583827	2	2.50398	0	5.753e-07	37.82	0.0321967	2	1919.76	1.036	33.6423	0
	High	VLGsEGEEEDEALsPAk	3	5	1	B4E135	S4(Phospho); S14(Phospho); K17(Lys8)	0	2.29574e+06	0.604203	1		0	0.0001398	34.14	0.0844198	2	1927.77	0.631612	34.6983	0
	High	EGEDGDQPTtPPKPLK	2	5	1	B4E135	T10(Phospho)	0	1.73103e+06	0.470042	2	8.13884	0	0.006774	13.19	16.6563	2	1788.81	0.535353	27.0311	0
	High	EGEDGDQPTtPPkPLk	1	5	1	B4E135	T10(Phospho); K13(Lys8); K16(Lys8)	0	655772				0.003	0.02295	10.88	33.9617	2	1804.83	0.419919	27.0668	0
	High	AEtPTESVsEPEVATK	1	5	1	B4E135	T3(Phospho); S9(Phospho)	0	953420	0.419299	1		0.004	0.0302	17.49	3.74567	2	1834.74	2.03867	29.0622	0
Q01813	ATP-dependent 6-phosphofructokinase, platelet type OS=Homo sapiens GN=PFKP PE=1 SV=2 - [PFKAP_HUMAN]	58.12	3.95	1	3	3	7	859714	1.11121	6	7.43703	784	85.5415	7.54736
	A2	Sequence	# PSMs	# Proteins	# Protein Groups	Protein Group Accessions	Modifications	ΔCn	Area	Heavy/Light	Heavy/Light Count	Heavy/Light Variability [%]	q-Value	PEP	IonScore	Exp Value	Charge	MH+ [Da]	ΔM [ppm]	RT [min]	# Missed Cleavages
	High	AIGVLTSGGDAQGmNAAVR	2	1	1	Q01813	M14(Oxidation)	0	462932	1.06468	1		0	5.064e-08	33.67	0.186397	2	1803.9	1.43037	32.8461	0
	High	GRsFAGNLNTYK	1	1	1	Q01813	S3(Phospho)	0	928029	1.18772	1		0	0.00374	31.55	0.162223	2	1407.64	0.395848	30.9362	1
	High	GrsFAGNLNTYk	1	1	1	Q01813	R2(Arg10); S3(Phospho); K12(Lys8)	0	1.25189e+06	1.12274	1		0	0.0009985	26.3	0.599185	2	1425.66	0.214644	32.3975	1
	High	AIGVLTSGGDAQGmNAAVr	1	1	1	Q01813	M14(Oxidation); R19(Arg10)	0	447993	1.09979	1		0	2.107e-05	19.83	4.28499	2	1813.91	0.834325	32.0272	0
	High	sFAGNLNTYK	2	1	1	Q01813	S1(Phospho)	0	864320	1.0748	2	13.5121	0.003	0.0201	25.17	0.424508	2	1194.52	0.288382	35.4068	0
P55072	Transitional endoplasmic reticulum ATPase OS=Homo sapiens GN=VCP PE=1 SV=4 - [TERA_HUMAN]	54.99	7.32	1	4	4	9	2.36099e+06	0.784022	5	28.2442	806	89.2657	5.26221
	A2	Sequence	# PSMs	# Proteins	# Protein Groups	Protein Group Accessions	Modifications	ΔCn	Area	Heavy/Light	Heavy/Light Count	Heavy/Light Variability [%]	q-Value	PEP	IonScore	Exp Value	Charge	MH+ [Da]	ΔM [ppm]	RT [min]	# Missed Cleavages
	High	LIVDEAINEDNSVVSLSQPK	3	1	1	P55072		0	1.17463e+06	0.785454	2	64.9884	0	6.358e-10	43.97	0.0196445	2	2170.12	-0.245463	47.5175	0
	High	LIVDEAINEDNSVVSLSQPk	3	1	1	P55072	K20(Lys8)	0	649942	0.784022	1		0	3.881e-06	28.02	0.702589	2	2178.14	0.522214	46.6106	0
	High	LGDVISIQPcPDVK	1	1	1	P55072	C10(Carbamidomethyl)	0	5.25604e+06				0.004	0.03115	15.99	7.85138	2	1540.8	0.533402	41.9543	0
	High	GILLYGPPGTGK	1	1	1	P55072		0	652298	0.650392	1		0.006	0.0436	16.73	3.89403	2	1172.67	0.178088	39.1001	0
	High	LDQLIYIPLPDEK	1	1	1	P55072		0	312890	0.803361	1		0.006	0.05313	16.44	5.36369	2	1556.86	1.49101	53.2379	0
Q8IYB3	Serine/arginine repetitive matrix protein 1 OS=Homo sapiens GN=SRRM1 PE=1 SV=2 - [SRRM1_HUMAN]	54.24	8.41	3	6	6	9	5.21703e+06	0.418478	7	138.744	904	102.274	11.8394
	A2	Sequence	# PSMs	# Proteins	# Protein Groups	Protein Group Accessions	Modifications	ΔCn	Area	Heavy/Light	Heavy/Light Count	Heavy/Light Variability [%]	q-Value	PEP	IonScore	Exp Value	Charge	MH+ [Da]	ΔM [ppm]	RT [min]	# Missed Cleavages
	High	kETEsEAEDNLDDLEk	2	3	1	Q8IYB3	K1(Lys8); S5(Phospho); K16(Lys8)	0	1.56921e+06	0.877101	1		0	8.592e-07	41.09	0.0251423	2	1960.83	0.812394	33.9125	1
	High	KETEsEAEDNLDDLEK	2	3	1	Q8IYB3	S5(Phospho)	0	1.98787e+06	1.0063	1		0	0.000157	31.08	0.218002	2	1944.8	0.23136	35.9073	1
	High	KPPAPPsPVQSQSPsTNWSPAVPVK	1	3	1	Q8IYB3	S7(Phospho); S15(Phospho)	0	2.55352e+06	0.208066	1		0	0.0001897	12.33	51.2685	3	2743.29	-0.646132	41.4998	0
	High	HrPsPPAtPPPk	1	2	1	Q8IYB3	R2(Arg10); S4(Phospho); T8(Phospho); K12(Lys8)	0	1.15625e+06	0.294513	1		0.001	0.01096	11.62	16.3658	3	1459.66	0.160274	19.6533	0
	High	REsPsPAPKPR	1	3	1	Q8IYB3	S3(Phospho); S5(Phospho)	0	2.00438e+06	0.740347	1		0.004	0.02974	25.93	0.462549	3	1381.6	-0.243036	14.4588	1
	High	RRsPsPAPPPR	1	3	1	Q8IYB3	S3(Phospho); S5(Phospho)	0	1.06423e+07	0.418478	1		0.006	0.03522	14.63	6.99203	3	1377.62	-0.349489	14.8476	2
	High	KPPAPPsPVQSQSPStNWSPAVPVKK	1	3	1	Q8IYB3	S7(Phospho); T16(Phospho)	0	2.45529e+06	0.01	1		0.006	0.05517	12.73	46.5415	4	2871.38	0.122227	36.8495	1
A0A0A0MSI0	Peroxiredoxin-1 (Fragment) OS=Homo sapiens GN=PRDX1 PE=4 SV=1 - [A0A0A0MSI0_HUMAN]	54	18.13	2	3	3	5	937375	0.862547	5	25.5921	171	18.9637	6.91748
	A2	Sequence	# PSMs	# Proteins	# Protein Groups	Protein Group Accessions	Modifications	ΔCn	Area	Heavy/Light	Heavy/Light Count	Heavy/Light Variability [%]	q-Value	PEP	IonScore	Exp Value	Charge	MH+ [Da]	ΔM [ppm]	RT [min]	# Missed Cleavages
	High	QITVNDLPVGr	1	2	1	A0A0A0MSI0	R11(Arg10)	0	557705	0.840843	1		0	0.006033	37.77	0.0289934	2	1221.68	0.460649	37.4374	0
	High	QITVNDLPVGR	2	2	1	A0A0A0MSI0		0	1.48033e+06	0.660133	2	41.2626	0	0.0005152	28.52	0.269891	2	1211.67	0.236735	38.9148	0
	High	LVQAFQFTDK	1	2	1	A0A0A0MSI0		0	861393	1.02226	1		0	0.008575	21.56	1.48619	2	1196.63	0.695482	39.5226	0
	High	TIAQDYGVLK	1	2	1	A0A0A0MSI0		0	470402	1.38351	1		0.004	0.02568	21.32	1.33634	2	1107.61	0.705042	36.5795	0
B4DUR8	T-complex protein 1 subunit gamma OS=Homo sapiens GN=CCT3 PE=1 SV=1 - [B4DUR8_HUMAN]	53.0933	4.6	3	2	2	4	635771	1.02288	3	1.7288	500	55.6387	5.64307
	A2	Sequence	# PSMs	# Proteins	# Protein Groups	Protein Group Accessions	Modifications	ΔCn	Area	Heavy/Light	Heavy/Light Count	Heavy/Light Variability [%]	q-Value	PEP	IonScore	Exp Value	Charge	MH+ [Da]	ΔM [ppm]	RT [min]	# Missed Cleavages
	High	TAVETAVLLLR	1	3	1	B4DUR8		0	568598	0.937029	1		0	7.773e-08	50.81	0.00069749	2	1185.72	-0.47162	48.8535	0
	High	TAVETAVLLLr	1	3	1	B4DUR8	R11(Arg10)	0	479514				0	0.00373	22.76	0.463456	2	1195.73	0.681881	48.8109	0
	High	TLIQNcGASTIR	2	3	1	B4DUR8	C6(Carbamidomethyl)	0	702943	1.02886	2	0.864351	0	0.00207	22.19	1.58355	2	1333.69	0.871256	31.444	0
O43707	Alpha-actinin-4 OS=Homo sapiens GN=ACTN4 PE=1 SV=2 - [ACTN4_HUMAN]	52.5967	3.84	1	3	3	6	929983	1.09236	5	13.0818	911	104.788	5.43994
	A2	Sequence	# PSMs	# Proteins	# Protein Groups	Protein Group Accessions	Modifications	ΔCn	Area	Heavy/Light	Heavy/Light Count	Heavy/Light Variability [%]	q-Value	PEP	IonScore	Exp Value	Charge	MH+ [Da]	ΔM [ppm]	RT [min]	# Missed Cleavages
	High	FAIQDISVEETSAK	1	1	1	O43707		0	490345	1.00048	1		0	0.0001251	34.65	0.115907	2	1537.78	1.3237	41.7398	0
	High	NFITAEELr	2	1	1	O43707	R9(Arg10)	0	1.5589e+06	1.03394	2	10.0209	0.001	0.01119	39.74	0.0186965	2	1102.58	0.652904	37.6997	0
	High	TINEVENQILTr	1	1	1	O43707	R12(Arg10)	0	437958	2.27059	1		0.002	0.01874	12.1	14.7644	2	1439.77	1.36658	39.1614	0
	High	NFITAEELR	2	1	1	O43707		0	1.86165e+06	1.09236	1		0.003	0.02328	31.54	0.114057	2	1092.57	0.182885	40.0112	0
Q12906-5	Isoform 5 of Interleukin enhancer-binding factor 3 OS=Homo sapiens GN=ILF3 - [ILF3_HUMAN]	52.58	7.1	4	2	2	4	7.22603e+06	0.395915	4	11.4173	690	74.5603	8.23584
	A2	Sequence	# PSMs	# Proteins	# Protein Groups	Protein Group Accessions	Modifications	ΔCn	Area	Heavy/Light	Heavy/Light Count	Heavy/Light Variability [%]	q-Value	PEP	IonScore	Exp Value	Charge	MH+ [Da]	ΔM [ppm]	RT [min]	# Missed Cleavages
	High	GEDSAEEtEAKPAVVAPAPVVEAVSTPSAAFPSDATAEQGPILTK	1	4	1	Q12906-5	T8(Phospho)	0	278070	0.447784	1		0	7.395e-07	44.26	0.0408964	3	4515.2	5.63512	53.3154	0
	High	DSSKGEDSAEEtEAKPAVVAPAPVVEAVSTPSAAFPSDATAEQGPILTK	2	4	1	Q12906-5	T12(Phospho)	0	1.4174e+07	0.371712	2	13.927	0	3.893e-11	33.32	0.583566	4	4932.36	1.02154	51.2709	1
	High	DSSkGEDSAEEtEAkPAVVAPAPVVEAVSTPSAAFPSDATAEQGPILTk	1	4	1	Q12906-5	K4(Lys8); T12(Phospho); K15(Lys8); K49(Lys8)	0	2.09693e+06	0.384058	1		0	0.0001092	14.75	36.6754	4	4956.42	3.55446	51.9542	1
P63104	14-3-3 protein zeta/delta OS=Homo sapiens GN=YWHAZ PE=1 SV=1 - [1433Z_HUMAN]	51.1	13.06	1	2	2	6	630558	0.994381	5	14.3492	245	27.7277	4.79248
	A2	Sequence	# PSMs	# Proteins	# Protein Groups	Protein Group Accessions	Modifications	ΔCn	Area	Heavy/Light	Heavy/Light Count	Heavy/Light Variability [%]	q-Value	PEP	IonScore	Exp Value	Charge	MH+ [Da]	ΔM [ppm]	RT [min]	# Missed Cleavages
	High	SVTEQGAELSNEEr	3	1	1	P63104	R14(Arg10)	0	670876	1.01747	2	3.40428	0	1.197e-05	36.59	0.0638983	2	1558.72	0.39871	25.9419	0
	High	SVTEQGAELSNEER	1	1	1	P63104		0	680814	1.09489	1		0	8.276e-06	26.56	0.625749	2	1548.72	1.48425	24.7771	0
	High	GIVDQSQQAYQEAFEISk	1	1	1	P63104	K18(Lys8)	0	282848	0.791995	1		0	0.0001518	19.42	6.1744	2	2049	1.41133	48.0989	0
	High	GIVDQSQQAYQEAFEISK	1	1	1	P63104		0	580303	0.893328	1		0.008	0.0836	10.34	49.1893	2	2040.99	2.87133	47.3467	0
P23526-2	Isoform 2 of Adenosylhomocysteinase OS=Homo sapiens GN=AHCY - [SAHH_HUMAN]	49.89	5.94	2	2	2	4	439368	0.90898	3	31.0711	404	44.6296	6.46826
	A2	Sequence	# PSMs	# Proteins	# Protein Groups	Protein Group Accessions	Modifications	ΔCn	Area	Heavy/Light	Heavy/Light Count	Heavy/Light Variability [%]	q-Value	PEP	IonScore	Exp Value	Charge	MH+ [Da]	ΔM [ppm]	RT [min]	# Missed Cleavages
	High	VPAINVNDSVTK	2	2	1	P23526-2		0	538765	0.820523	2	15.2669	0	1.16e-05	39.29	0.0249358	2	1256.69	0.830099	33.2294	0
	High	VAVVAGYGDVGk	1	2	1	P23526-2	K12(Lys8)	0	339972	1.2469	1		0	0.0003276	33.1	0.0852705	2	1142.63	0.0664875	30.2668	0
	High	VPAINVNDSVTk	1	2	1	P23526-2	K12(Lys8)	0	359144				0.007	0.06891	17.92	3.40307	2	1264.7	0.601083	31.7918	0
P05089-3	Isoform 3 of Arginase-1 OS=Homo sapiens GN=ARG1 - [ARGI1_HUMAN]	48.6055	9.75	3	3	3	5	2.44142e+06	0.01	5	0	236	25.3404	8.51416
	A2	Sequence	# PSMs	# Proteins	# Protein Groups	Protein Group Accessions	Modifications	ΔCn	Area	Heavy/Light	Heavy/Light Count	Heavy/Light Variability [%]	q-Value	PEP	IonScore	Exp Value	Charge	MH+ [Da]	ΔM [ppm]	RT [min]	# Missed Cleavages
	High	TIGIIGAPFSK	2	3	1	P05089-3		0	3.68939e+06	0.01	2	0	0	0.001268	40.28	0.013229	2	1103.65	0.720171	45.3244	0
	High	GGVEEGPTVLR	2	3	1	P05089-3		0	1.99299e+06	0.01	2	0	0	0.006661	26.95	0.404582	2	1113.59	0.0737426	28.4342	0
	High	GGVEEGPTVLRK	1	3	1	P05089-3		0	1.64188e+06	0.01	1		0	0.007325	23.01	0.919564	2	1241.69	0.558252	24.5159	1
Q5STZ8	ATP-binding cassette sub-family F member 1 (Fragment) OS=Homo sapiens GN=ABCF1 PE=1 SV=3 - [Q5STZ8_HUMAN]	48.46	12.68	2	3	3	6	814148	0.680689	5	13.3734	339	38.2956	5.87158
	A2	Sequence	# PSMs	# Proteins	# Protein Groups	Protein Group Accessions	Modifications	ΔCn	Area	Heavy/Light	Heavy/Light Count	Heavy/Light Variability [%]	q-Value	PEP	IonScore	Exp Value	Charge	MH+ [Da]	ΔM [ppm]	RT [min]	# Missed Cleavages
	High	KAEQGsEEEGEGEEEEEEGGESK	3	2	1	Q5STZ8	S6(Phospho)	0	1.31184e+06	0.711949	2	6.66449	0	2.44e-07	30.82	0.185169	3	2561.96	1.4788	19.5288	1
	High	AEQGsEEEGEGEEEEEEGGESK	1	2	1	Q5STZ8	S5(Phospho)	0	556509	0.675404	1		0	4.131e-06	24.81	0.413953	2	2433.86	0.408297	21.294	0
	High	kAEQGsEEEGEGEEEEEEGGESk	1	2	1	Q5STZ8	K1(Lys8); S6(Phospho); K23(Lys8)	0	669491	0.803632	1		0	0.001456	23.3	1.25213	3	2577.98	1.51049	20.7012	1
	High	QQPPEPEWIGDGESTsPSDK	1	2	1	Q5STZ8	S16(Phospho)	0	574096	0.0223674	1		0	8.675e-05	19.23	4.57238	2	2263.94	0.14065	39.1348	0
Q9UQ35	Serine/arginine repetitive matrix protein 2 OS=Homo sapiens GN=SRRM2 PE=1 SV=2 - [SRRM2_HUMAN]	48.36	6.76	2	10	10	21	1.02753e+07	0.558072	16	33.5179	2752	299.438	12.0591
	A2	Sequence	# PSMs	# Proteins	# Protein Groups	Protein Group Accessions	Modifications	ΔCn	Area	Heavy/Light	Heavy/Light Count	Heavy/Light Variability [%]	q-Value	PEP	IonScore	Exp Value	Charge	MH+ [Da]	ΔM [ppm]	RT [min]	# Missed Cleavages
	High	SStPPGESYFGVSSLQLK	2	2	1	Q9UQ35	T3(Phospho)	0	440466	0.750879	2	20.6549	0	7.406e-05	41.52	0.0320952	2	1963.91	1.25461	50.2084	0
	High	HGGsPQPLATTPLSQEPVNPPSEASPtr	2	2	1	Q9UQ35	S4(Phospho); T27(Phospho); R28(Arg10)	0	3.51586e+06	0.260001	1		0	2.366e-11	33.29	0.460164	3	3022.36	1.22831	40.8929	0
	High	THTTALAGRsPsPASGR	3	2	1	Q9UQ35	S10(Phospho); S12(Phospho)	0	1.06333e+07	0.631684	2	3.78754	0	6.279e-05	26.72	0.660362	3	1826.8	0.611573	20.5096	1
	High	HGGsPQPLATTPLSQEPVNPPSEASPtR	4	2	1	Q9UQ35	S4(Phospho); T27(Phospho)	0	1.3297e+07	0.290909	2	5.68443	0	1.483e-07	21.82	6.28524	3	3012.35	1.56629	40.6858	0
	High	AQtPPGPSLSGSKsPcPQEK	1	2	1	Q9UQ35	T3(Phospho); S14(Phospho); C16(Carbamidomethyl)	0	6.89543e+06	0.433756	1		0	0.001114	18.99	5.08327	3	2212.94	0.260973	26.1444	1
	High	AQtPPGPSLSGSksPcPQEk	2	2	1	Q9UQ35	T3(Phospho); K13(Lys8); S14(Phospho); C16(Carbamidomethyl); K20(Lys8)	0	2.66747e+06	0.462351	1		0	0.001181	13.23	22.3503	3	2228.96	0.388539	26.1801	1
	High	mGQAPSQSLLPPAQDQPRSPVPsAFSDQSR	1	1	1	Q9UQ35	M1(Oxidation); S23(Phospho)	0	1.69919e+06	0.294813	1		0	0.00774	13.11	54.7511	3	3275.52	1.86173	40.9512	1
	High	AGmSSNQSISsPVLDAVPRtPSR	1	2	1	Q9UQ35	M3(Oxidation); S11(Phospho); T20(Phospho)	0	2.4412e+06	0.535424	1		0	0.003332	11.22	49.3944	3	2533.12	0.0617573	38.4807	1
	High	THTtALAGrsPSPASGr	1	2	1	Q9UQ35	T4(Phospho); R9(Arg10); S10(Phospho); R17(Arg10)	0	2.41689e+06	0.624135	1		0.001	0.01365	15.09	10.92	3	1846.81	0.40802	21.5871	1
	High	SSsPVTELASRsPIR	1	2	1	Q9UQ35	S3(Phospho); S12(Phospho)	0	1.55924e+06	0.581679	1		0.003	0.02152	15.36	9.27791	2	1746.78	-0.0682047	34.6028	1
	High	GEGDAPFSEPGttSTQRPSSPETATK	1	2	1	Q9UQ35	T12(Phospho); T13(Phospho)	0	1.27324e+06	0.481287	1		0.003	0.02385	10.26	48.7946	3	2795.15	1.21284	31.3153	0
	High	SLsYsPVEr	1	2	1	Q9UQ35	S3(Phospho); S5(Phospho); R9(Arg10)	0	1.04559e+06	0.726521	1		0.004	0.02986	21.01	0.681155	2	1207.47	0.444456	30.3531	0
	High	ssSPVTELASr	1	2	1	Q9UQ35	S1(Phospho); S2(Phospho); R11(Arg10)	0	534235	0.888119	1		0.006	0.04309	17.15	2.13088	2	1303.52	1.78326	33.4361	0
P53396	ATP-citrate synthase OS=Homo sapiens GN=ACLY PE=1 SV=3 - [ACLY_HUMAN]	47.75	4.54	1	4	4	7	896385	0.746914	6	22.0461	1101	120.762	7.32764
	A2	Sequence	# PSMs	# Proteins	# Protein Groups	Protein Group Accessions	Modifications	ΔCn	Area	Heavy/Light	Heavy/Light Count	Heavy/Light Variability [%]	q-Value	PEP	IonScore	Exp Value	Charge	MH+ [Da]	ΔM [ppm]	RT [min]	# Missed Cleavages
	High	FIcTTSAIQNr	2	1	1	P53396	C3(Carbamidomethyl); R11(Arg10)	0	547902	0.933947	1		0	9.992e-05	37.35	0.0440221	2	1320.66	0.357375	29.2796	0
	High	SGGmSNELNNIISR	1	1	1	P53396	M4(Oxidation)	0	311581	0.73419	1		0	0.006326	22.34	1.77338	2	1507.72	1.67387	37.875	0
	High	FIcTTSAIQNR	1	1	1	P53396	C3(Carbamidomethyl)	0	416403	0.801399	1		0	0.001158	20.1	2.59163	2	1310.65	0.708403	31.6668	0
	High	AKPAmPQDSVPsPR	1	1	1	P53396	M5(Oxidation); S12(Phospho)	0	1.79198e+06	0.379517	1		0.005	0.03391	28.47	0.402377	2	1576.72	1.64767	24.2562	0
	High	DGVYVLDLAAK	2	1	1	P53396		0	349275	0.638092	2	26.3338	0.006	0.04408	14.23	6.68303	2	1163.63	2.67727	45.5154	0
P36915	Guanine nucleotide-binding protein-like 1 OS=Homo sapiens GN=GNL1 PE=1 SV=2 - [GNL1_HUMAN]	46.3	3.95	1	2	2	4	1.01855e+06	1.22294	3	2.92963	607	68.6185	5.79541
	A2	Sequence	# PSMs	# Proteins	# Protein Groups	Protein Group Accessions	Modifications	ΔCn	Area	Heavy/Light	Heavy/Light Count	Heavy/Light Variability [%]	q-Value	PEP	IonScore	Exp Value	Charge	MH+ [Da]	ΔM [ppm]	RT [min]	# Missed Cleavages
	High	EEQTDtSDGESVTHHIr	1	1	1	P36915	T6(Phospho); R17(Arg10)	0	1.09381e+06	1.24734	1		0.004	0.02919	23.97	1.23407	2	2030.83	0.765604	25.3368	0
	High	VDLSSWr	1	1	1	P36915	R7(Arg10)	0	556052	1.22294	1		0.006	0.03492	34.49	0.0385682	2	872.45	-0.19898	36.8809	0
	High	EEQTDTsDGESVTHHIR	1	1	1	P36915	S7(Phospho)	0	871876				0.006	0.0411	13.72	12.1038	2	2020.83	1.11611	25.3598	0
	High	VDLSSWR	1	1	1	P36915		0	943287	1.11883	1		0.009	0.08527	27.84	0.184334	2	862.442	-0.167369	34.5951	0
P81605	Dermcidin OS=Homo sapiens GN=DCD PE=1 SV=2 - [DCD_HUMAN]	45.8959	33.64	2	3	3	7	1.7162e+06	0.01	7	0	110	11.2768	6.53662
	A2	Sequence	# PSMs	# Proteins	# Protein Groups	Protein Group Accessions	Modifications	ΔCn	Area	Heavy/Light	Heavy/Light Count	Heavy/Light Variability [%]	q-Value	PEP	IonScore	Exp Value	Charge	MH+ [Da]	ΔM [ppm]	RT [min]	# Missed Cleavages
	High	SSLLEKGLDGAK	3	2	1	P81605		0	3.30527e+06	0.01	3	0	0	0.001228	38.54	0.0269071	2	1217.67	-0.124653	30.8959	1
	High	ENAGEDPGLAR	1	2	1	P81605		0	879346	0.01	1		0	0.004901	26.37	0.390417	2	1128.53	0.271691	21.8802	0
	High	LGKDAVEDLESVGK	3	2	1	P81605		0	963996	0.01	3	0	0	0.0001772	26.06	0.703216	2	1459.76	0.0920592	37.3721	1
P22059	Oxysterol-binding protein 1 OS=Homo sapiens GN=OSBP PE=1 SV=1 - [OSBP1_HUMAN]	45.23	9.17	1	3	3	8	1.93952e+06	0.932499	5	4.40165	807	89.3646	7.29834
	A2	Sequence	# PSMs	# Proteins	# Protein Groups	Protein Group Accessions	Modifications	ΔCn	Area	Heavy/Light	Heavy/Light Count	Heavy/Light Variability [%]	q-Value	PEP	IonScore	Exp Value	Charge	MH+ [Da]	ΔM [ppm]	RT [min]	# Missed Cleavages
	High	mLAEsDEsGDEESVSQTDKTELQNTLR	2	1	1	P22059	M1(Oxidation); S5(Phospho); S8(Phospho)	0	5.26046e+06	0.905234	1		0	2.208e-08	31.38	0.459702	3	3188.29	1.11715	40.1423	1
	High	mLAEsDEsGDEESVSQTDkTELQNTLr	3	1	1	P22059	M1(Oxidation); S5(Phospho); S8(Phospho); K19(Lys8); R27(Arg10)	0	3.99969e+06	0.925518	2	1.11409	0	0.0001734	29.12	0.824963	3	3206.31	1.29903	39.5218	1
	High	TGsNIsGASSDISLDEQYK	1	1	1	P22059	S3(Phospho); S6(Phospho)	0	444687	1.10444	1		0	0.0001676	23.01	1.22708	2	2131.85	0.146477	39.4605	0
	High	tGSNIsGASSDISLDEQYk	1	1	1	P22059	T1(Phospho); S6(Phospho); K19(Lys8)	0	491566	1.6729	1		0	0.006612	12.56	14.5256	2	2139.86	-1.5836	39.2609	0
	High	GDmsDEDDENEFFDAPEIITmPENLGHK	1	1	1	P22059	M3(Oxidation); S4(Phospho); M21(Oxidation)	0	66544.9				0.004	0.02489	19.35	6.00759	3	3307.29	-1.80983	54.3036	0
P17252	Protein kinase C alpha type OS=Homo sapiens GN=PRKCA PE=1 SV=4 - [KPCA_HUMAN]	43.06	9.08	1	2	2	8	6.46742e+06	0.741018	3	5.83924	672	76.7001	7.04932
	A2	Sequence	# PSMs	# Proteins	# Protein Groups	Protein Group Accessions	Modifications	ΔCn	Area	Heavy/Light	Heavy/Light Count	Heavy/Light Variability [%]	q-Value	PEP	IonScore	Exp Value	Charge	MH+ [Da]	ΔM [ppm]	RT [min]	# Missed Cleavages
	High	TFcGtPDYIAPEIIAYQPYGk	3	1	1	P17252	C3(Carbamidomethyl); T5(Phospho); K21(Lys8)	0	805546	0.717552	2	4.77347	0	0.0001963	32.77	0.362038	2	2492.13	-1.06669	55.5221	0
	High	GQPVLtPPDQLVIANIDQSDFEGFsYVNPQFVHPILQSAV	1	1	1	P17252	T6(Phospho); S25(Phospho)	0	1.1699e+07				0	4.459e-06	31.29	0.994085	3	4540.15	-0.201627	69.4167	0
	High	tFcGTPDYIAPEIIAYQPYGK	4	1	1	P17252	T1(Phospho); C3(Carbamidomethyl)	0	1.23579e+06	0.770759	1		0	0.003863	25.28	2.07286	2	2484.12	2.18876	54.8286	0
Q7Z417	Nuclear fragile X mental retardation-interacting protein 2 OS=Homo sapiens GN=NUFIP2 PE=1 SV=1 - [NUFP2_HUMAN]	42.6967	3.88	1	2	2	4	1.13519e+06	0.729825	2	8.56595	695	76.0747	8.70459
	A2	Sequence	# PSMs	# Proteins	# Protein Groups	Protein Group Accessions	Modifications	ΔCn	Area	Heavy/Light	Heavy/Light Count	Heavy/Light Variability [%]	q-Value	PEP	IonScore	Exp Value	Charge	MH+ [Da]	ΔM [ppm]	RT [min]	# Missed Cleavages
	High	GADNDGSGSEsGYTTPK	2	1	1	Q7Z417	S11(Phospho)	0	1.51523e+06	0.773152	1		0.002	0.01842	23.92	0.457414	2	1722.65	0.486252	21.9254	0
	High	GADNDGSGSEsGYTTPk	1	1	1	Q7Z417	S11(Phospho); K17(Lys8)	0	1.05435e+06				0.003	0.01988	23.92	0.600153	2	1730.67	1.02583	21.9313	0
	High	NDsWGSFDLR	1	1	1	Q7Z417	S3(Phospho)	0	755157	0.688926	1		0.005	0.03301	28.19	0.118633	2	1276.5	0.36289	46.736	0
P13010	X-ray repair cross-complementing protein 5 OS=Homo sapiens GN=XRCC5 PE=1 SV=3 - [XRCC5_HUMAN]	42.1933	7.24	1	3	3	4	1.4593e+06	0.725018	4	21.4933	732	82.6523	5.80811
	A2	Sequence	# PSMs	# Proteins	# Protein Groups	Protein Group Accessions	Modifications	ΔCn	Area	Heavy/Light	Heavy/Light Count	Heavy/Light Variability [%]	q-Value	PEP	IonScore	Exp Value	Charge	MH+ [Da]	ΔM [ppm]	RT [min]	# Missed Cleavages
	High	YGSDIVPFSK	2	1	1	P13010		0	558603	0.725018	2	4.81949	0	7.558e-05	38.25	0.025436	2	1112.56	-0.537672	38.9996	0
	High	TEQGGAHFSVSSLAEGSVTSVGSVNPAENFr	1	1	1	P13010	R31(Arg10)	0	3.31432e+06	0.972758	1		0	1.334e-05	26.38	2.3851	3	3131.49	1.30344	50.5163	0
	High	TDTLEDLFPTTK	1	1	1	P13010		0	504977	0.562287	1		0.004	0.03152	14.86	9.77314	2	1380.69	0.366219	47.7007	0
A0A087X2B6	Cell cycle and apoptosis regulator protein 2 OS=Homo sapiens GN=CCAR2 PE=1 SV=1 - [A0A087X2B6_HUMAN]	40.9567	9.56	5	2	2	9	3.98537e+06	0.948977	5	6.04208	272	30.4101	4.48779
	A2	Sequence	# PSMs	# Proteins	# Protein Groups	Protein Group Accessions	Modifications	ΔCn	Area	Heavy/Light	Heavy/Light Count	Heavy/Light Variability [%]	q-Value	PEP	IonScore	Exp Value	Charge	MH+ [Da]	ΔM [ppm]	RT [min]	# Missed Cleavages
	High	LEDsEVRSVAsNQSEmEFSSLQDmPK	2	5	1	A0A087X2B6	S4(Phospho); S11(Phospho); M16(Oxidation); M24(Oxidation)	0	6.50448e+06	1.00528	1		0	2.759e-06	33.54	0.257874	3	3135.26	0.977843	39.8391	1
	High	LEDSEVrsVAsNQSEmEFSSLQDmPk	2	5	1	A0A087X2B6	R7(Arg10); S8(Phospho); S11(Phospho); M16(Oxidation); M24(Oxidation); K26(Lys8)	0	5.57761e+06	0.948977	1		0	0.0003168	24.88	2.06105	3	3153.29	2.09266	40.4782	1
	High	sVAsNQSEmEFSSLQDmPk	1	5	1	A0A087X2B6	S1(Phospho); S4(Phospho); M9(Oxidation); M17(Oxidation); K19(Lys8)	0	909051	0.988413	1		0	0.00158	20.84	1.57204	2	2314.88	0.69094	38.0838	0
	High	SVAsNQSEmEFSSLQDmPK	1	5	1	A0A087X2B6	S4(Phospho); M9(Oxidation); M17(Oxidation)	0	0				0	0.0009373	17.56	5.02048	2	2226.89	0.526477	37.4221	0
	High	sVASNQsEmEFSSLQDmPK	3	5	1	A0A087X2B6	S1(Phospho); S7(Phospho); M9(Oxidation); M17(Oxidation)	0	1.46627e+06	0.822212	2	17.8553	0	0.00325	16.56	3.9711	2	2306.86	1.451	36.7515	0
F8WE98	Filamin-A (Fragment) OS=Homo sapiens GN=FLNA PE=1 SV=2 - [F8WE98_HUMAN]	40.59	4.47	6	2	2	4	668706	0.781788	4	12.9644	604	66.55	8.95361
	A2	Sequence	# PSMs	# Proteins	# Protein Groups	Protein Group Accessions	Modifications	ΔCn	Area	Heavy/Light	Heavy/Light Count	Heavy/Light Variability [%]	q-Value	PEP	IonScore	Exp Value	Charge	MH+ [Da]	ΔM [ppm]	RT [min]	# Missed Cleavages
	High	VTAQGPGLEPSGNIANK	3	6	1	F8WE98		0	966516	0.725845	3	19.5289	0	2.751e-07	37.41	0.0624991	2	1652.86	1.08711	31.0435	0
	High	GTVEPQLEAR	1	6	1	F8WE98		0	370895	0.863933	1		0.006	0.04521	11.12	13.1665	2	1099.57	0.439561	27.5812	0
P06400	Retinoblastoma-associated protein OS=Homo sapiens GN=RB1 PE=1 SV=2 - [RB_HUMAN]	38.72	5.93	1	2	2	3	2.86562e+06	0.286995	3	415.365	928	106.092	7.94287
	A2	Sequence	# PSMs	# Proteins	# Protein Groups	Protein Group Accessions	Modifications	ΔCn	Area	Heavy/Light	Heavy/Light Count	Heavy/Light Variability [%]	q-Value	PEP	IonScore	Exp Value	Charge	MH+ [Da]	ΔM [ppm]	RT [min]	# Missed Cleavages
	High	KTAATAAAAAAEPPAPPPPPPPEEDPEQDsGPEDLPLVR	2	1	1	P06400	S30(Phospho)	0	5.33922e+06	0.0535719	2	2209.12	0	3.722e-10	38.82	0.157884	3	3976.89	0.592976	44.5115	1
	High	IPGGNIYIsPLKsPYK	1	1	1	P06400	S9(Phospho); S13(Phospho)	0	392012	0.905907	1		0.009	0.08525	13.06	24.1718	2	1906.91	1.3786	46.5509	1
H0YJN0	Ena/VASP-like protein (Fragment) OS=Homo sapiens GN=EVL PE=1 SV=1 - [H0YJN0_HUMAN]	38.47	15.57	4	2	2	9	2.37436e+06	0.782726	6	10.0497	212	22.043	6.1001
	A2	Sequence	# PSMs	# Proteins	# Protein Groups	Protein Group Accessions	Modifications	ΔCn	Area	Heavy/Light	Heavy/Light Count	Heavy/Light Variability [%]	q-Value	PEP	IonScore	Exp Value	Charge	MH+ [Da]	ΔM [ppm]	RT [min]	# Missed Cleavages
	High	SNsVEkPVSSILSr	3	4	1	H0YJN0	S3(Phospho); K6(Lys8); R14(Arg10)	0	2.3067e+06	0.83161	1		0	0.000254	39.55	0.0381057	2	1600.81	0.329786	36.3182	0
	High	sNSVEKPVSSILSR	5	4	1	H0YJN0	S1(Phospho)	0	3.08197e+06	0.782726	4	6.04775	0	0.0001859	27.66	0.600656	2	1582.78	0.800746	36.9135	0
	High	KEDESQmEDPSTSPsPGTR	1	4	1	H0YJN0	M7(Oxidation); S15(Phospho)	0	1.66674e+06	0.648519	1		0.001	0.01197	11.27	18.4186	3	2173.86	0.762098	17.9523	1
B4DR64	CTP synthase OS=Homo sapiens GN=CTPS1 PE=1 SV=1 - [B4DR64_HUMAN]	37.42	8.06	2	3	3	5	958361	0.985638	4	1.55173	360	41.1938	6.88818
	A2	Sequence	# PSMs	# Proteins	# Protein Groups	Protein Group Accessions	Modifications	ΔCn	Area	Heavy/Light	Heavy/Light Count	Heavy/Light Variability [%]	q-Value	PEP	IonScore	Exp Value	Charge	MH+ [Da]	ΔM [ppm]	RT [min]	# Missed Cleavages
	High	SGSsSPDSEITELKFPSINHD	1	2	1	B4DR64	S4(Phospho)	0	1.43742e+06	0.986494	1		0	2.832e-05	37.3	0.0962699	2	2327.01	2.2177	47.5904	1
	High	SGSSsPDSEITELk	2	2	1	B4DR64	S5(Phospho); K14(Lys8)	0	979681	0.92047	2	13.173	0.004	0.03018	18.12	3.22755	2	1524.66	0.631296	33.8604	0
	High	IQAIAWAR	1	2	1	B4DR64		0	457978	0.984784	1		0.004	0.02783	15.55	3.46872	2	928.536	-0.0633453	35.4661	0
	High	SGSSsPDSEITELkFPSINHD	1	2	1	B4DR64	S5(Phospho); K14(Lys8)	0	1.37545e+06				0.004	0.02702	10.23	51.5039	2	2335.02	0.834227	47.6344	1
P11586	C-1-tetrahydrofolate synthase, cytoplasmic OS=Homo sapiens GN=MTHFD1 PE=1 SV=3 - [C1TC_HUMAN]	35.9	2.89	2	2	2	2	378542	0.741298	2	62.3539	935	101.495	7.29834
	A2	Sequence	# PSMs	# Proteins	# Protein Groups	Protein Group Accessions	Modifications	ΔCn	Area	Heavy/Light	Heavy/Light Count	Heavy/Light Variability [%]	q-Value	PEP	IonScore	Exp Value	Charge	MH+ [Da]	ΔM [ppm]	RT [min]	# Missed Cleavages
	High	GALALAQAVQr	1	2	1	P11586	R11(Arg10)	0	149000	1.09111	1		0	2.014e-06	35.9	0.0295596	2	1107.65	0.133865	37.4723	0
	High	YVVVTGITPTPLGEGK	1	2	1	P11586		0	608085	0.503636	1		0	0.0004537	14.44	8.1789	2	1630.91	0.870951	43.1009	0
Q6P2E9-2	Isoform 2 of Enhancer of mRNA-decapping protein 4 OS=Homo sapiens GN=EDC4 - [EDC4_HUMAN]	33.9	5.88	2	2	2	9	2.61022e+06	0.19855	6	816.317	1020	109.66	5.98584
	A2	Sequence	# PSMs	# Proteins	# Protein Groups	Protein Group Accessions	Modifications	ΔCn	Area	Heavy/Light	Heavy/Light Count	Heavy/Light Variability [%]	q-Value	PEP	IonScore	Exp Value	Charge	MH+ [Da]	ΔM [ppm]	RT [min]	# Missed Cleavages
	High	DSQDAsAEQSDHDDEVASLASASGGFGTK	2	2	1	Q6P2E9-2	S6(Phospho)	0	3.97379e+06	0.790156	2	6.42119	0	0.0001648	28.33	0.744746	3	2962.19	0.557996	41.8401	0
	High	DSQDASAEQsDHDDEVASLASASGGFGTk	3	2	1	Q6P2E9-2	S10(Phospho); K29(Lys8)	0	2.70626e+06	0.761911	1		0	0.0001798	22.38	3.20872	3	2970.2	0.913297	41.8522	0
	High	GPGQVPTATSALSLELQEVEPLGLPQASPsR	4	2	1	Q6P2E9-2	S30(Phospho)	0	1.24665e+06	0.0319307	3	83.2758	0	8.232e-06	21.62	5.30813	3	3209.61	1.05921	59.9314	0
Q12906-4	Isoform 4 of Interleukin enhancer-binding factor 3 OS=Homo sapiens GN=ILF3 - [ILF3_HUMAN]	33.47	6.45	3	2	2	4	6.44572e+06	0.374128	2	5.57844	698	75.4608	8.41162
	A2	Sequence	# PSMs	# Proteins	# Protein Groups	Protein Group Accessions	Modifications	ΔCn	Area	Heavy/Light	Heavy/Light Count	Heavy/Light Variability [%]	q-Value	PEP	IonScore	Exp Value	Charge	MH+ [Da]	ΔM [ppm]	RT [min]	# Missed Cleavages
	High	GEDsAEETEAKPAVVAPAPVVEAVSTPSAAFPSDATAENVK	1	3	1	Q12906-4	S4(Phospho)	0	2.98848e+06	0.360323	1		0	2.31e-10	33.47	0.597555	3	4118.94	1.72822	49.8013	0
	High	DSSKGEDSAEEtEAKPAVVAPAPVVEAVSTPSAAFPSDATAENVK	2	3	1	Q12906-4	T12(Phospho)	0	9.90296e+06	0.388462	1		0	1.007e-05	20.13	13.1456	4	4536.13	1.64575	48.3604	1
	High	GEDsAEETEAkPAVVAPAPVVEAVSTPSAAFPSDATAENVk	1	3	1	Q12906-4	S4(Phospho); K11(Lys8); K41(Lys8)	0	306732				0	1.603e-06	18.49	17.8036	3	4134.97	1.17135	49.8444	0
P06748-3	Isoform 3 of Nucleophosmin OS=Homo sapiens GN=NPM1 - [NPM_HUMAN]	31.28	16.99	3	2	2	4	1.87257e+06	0.570612	3	39.5392	259	28.3827	4.71631
	A2	Sequence	# PSMs	# Proteins	# Protein Groups	Protein Group Accessions	Modifications	ΔCn	Area	Heavy/Light	Heavy/Light Count	Heavy/Light Variability [%]	q-Value	PEP	IonScore	Exp Value	Charge	MH+ [Da]	ΔM [ppm]	RT [min]	# Missed Cleavages
	High	VDNDENEHQLSLR	1	3	1	P06748-3		0	695656	0.905327	1		0	0.002905	31.28	0.221148	2	1568.73	1.72898	27.3996	0
	High	cGSGPVHISGQHLVAVEEDAEsEDEEEEDVK	2	3	1	P06748-3	C1(Carbamidomethyl); S22(Phospho)	0	3.04948e+06	0.501787	2	19.2305	0	0.001168	24.79	2.75423	3	3460.44	0.579638	40.611	0
	High	cGSGPVHISGQHLVAVEEDAEsEDEEEEDVk	1	3	1	P06748-3	C1(Carbamidomethyl); S22(Phospho); K31(Lys8)	0	1.05918e+06				0	0.0005076	16.17	20.9384	3	3468.45	-0.0664008	40.6173	0
Q13263-2	Isoform 2 of Transcription intermediary factor 1-beta OS=Homo sapiens GN=TRIM28 - [TIF1B_HUMAN]	31.25	9.56	2	2	2	6	1.65539e+06	0.570868	4	20.4669	753	79.4235	5.98584
	A2	Sequence	# PSMs	# Proteins	# Protein Groups	Protein Group Accessions	Modifications	ΔCn	Area	Heavy/Light	Heavy/Light Count	Heavy/Light Variability [%]	q-Value	PEP	IonScore	Exp Value	Charge	MH+ [Da]	ΔM [ppm]	RT [min]	# Missed Cleavages
	High	STAPSAAASASASAAASsPAGGGAEALELLEHcGVcR	2	2	1	Q13263-2	S18(Phospho); C33(Carbamidomethyl); C36(Carbamidomethyl)	0	1.09249e+06	0.709156	1		0	1.735e-06	31.25	0.871377	3	3522.57	1.49777	51.1472	0
	High	QGSGSSQPmEVQEGYGFGSGDDPYSSAEPHVSGVK	2	2	1	Q13263-2	M9(Oxidation)	0	2.21829e+06	0.153307	2	782.963	0	4.004e-06	25.02	3.55617	3	3573.54	2.30517	38.7486	0
	High	QGSGSSQPmEVQEGYGFGSGDDPYSSAEPHVSGVk	1	2	1	Q13263-2	M9(Oxidation); K35(Lys8)	0	861102	0.53959	1		0	5.39e-05	16.6	25.1275	3	3581.56	1.98242	39.2174	0
	High	STAPSAAASASASAAASsPAGGGAEALELLEHcGVcr	1	2	1	Q13263-2	S18(Phospho); C33(Carbamidomethyl); C36(Carbamidomethyl); R37(Arg10)	0	697273				0	5.527e-06	15.2	35.951	3	3532.57	-0.39804	51.1537	0
Q9NPI6-2	Isoform 2 of mRNA-decapping enzyme 1A OS=Homo sapiens GN=DCP1A - [DCP1A_HUMAN]	30.97	9.01	2	2	2	8	5.23176e+06	0.501419	5	43.6523	544	59.3244	6.63916
	A2	Sequence	# PSMs	# Proteins	# Protein Groups	Protein Group Accessions	Modifications	ΔCn	Area	Heavy/Light	Heavy/Light Count	Heavy/Light Variability [%]	q-Value	PEP	IonScore	Exp Value	Charge	MH+ [Da]	ΔM [ppm]	RT [min]	# Missed Cleavages
	High	kAsSPsPLTIGTPESQr	1	2	1	Q9NPI6-2	K1(Lys8); S3(Phospho); S6(Phospho); R17(Arg10)	0	608011	0.660782	1		0	0.0006625	25.96	1.1313	2	1933.88	0.857029	32.9591	1
	High	HAPTYTIPLsPVLsPTLPAEAPTAQVPPSLPR	4	2	1	Q9NPI6-2	S10(Phospho); S14(Phospho)	0	9.27542e+06	0.0845697	2	94.6951	0	1.21e-06	24.2	2.97194	3	3478.75	1.35744	57.6114	0
	High	KAsSPsPLTIGTPESQR	3	2	1	Q9NPI6-2	S3(Phospho); S6(Phospho)	0	1.1881e+06	0.577256	2	21.1114	0	0.0001803	21.54	2.80231	2	1915.86	1.12364	32.9414	1
H0YH81	ATP synthase subunit beta (Fragment) OS=Homo sapiens GN=ATP5B PE=1 SV=1 - [H0YH81_HUMAN]	30.8267	9.67	2	2	2	4	625961	0.551286	4	27.2303	362	38.2249	5.5542
	A2	Sequence	# PSMs	# Proteins	# Protein Groups	Protein Group Accessions	Modifications	ΔCn	Area	Heavy/Light	Heavy/Light Count	Heavy/Light Variability [%]	q-Value	PEP	IonScore	Exp Value	Charge	MH+ [Da]	ΔM [ppm]	RT [min]	# Missed Cleavages
	High	AIAELGIYPAVDPLDSTSR	3	2	1	H0YH81		0	636995	0.471197	3	18.9339	0	0.004913	26.78	0.86172	2	1988.04	3.14441	51.838	0
	High	ImDPNIVGSEHYDVAR	1	2	1	H0YH81	M2(Oxidation)	0	614927	0.675909	1		0	0.0001885	21.48	2.97465	3	1831.87	0.870505	34.2221	0
Q9BW71	HIRA-interacting protein 3 OS=Homo sapiens GN=HIRIP3 PE=1 SV=3 - [HIRP3_HUMAN]	29.83	7.73	1	3	3	9	2.53934e+06	0.762402	7	13.6806	556	61.92	8.54346
	A2	Sequence	# PSMs	# Proteins	# Protein Groups	Protein Group Accessions	Modifications	ΔCn	Area	Heavy/Light	Heavy/Light Count	Heavy/Light Variability [%]	q-Value	PEP	IonScore	Exp Value	Charge	MH+ [Da]	ΔM [ppm]	RT [min]	# Missed Cleavages
	High	EVsDSEAGGGPQGEr	1	1	1	Q9BW71	S3(Phospho); R15(Arg10)	0	1.67744e+06	0.835743	1		0	0.0003307	34.15	0.0569773	2	1564.62	1.2602	19.8149	0
	High	EVsDSEAGGGPQGER	2	1	1	Q9BW71	S3(Phospho)	0	3.11269e+06	0.755158	2	1.41545	0	0.003309	17.77	1.96771	2	1554.61	-0.00847662	18.1994	0
	High	SLkEsEQEsEEEILAQk	1	1	1	Q9BW71	K3(Lys8); S5(Phospho); S9(Phospho); K17(Lys8)	0	825030	0.792057	1		0	0.001539	17.63	6.91543	2	2152.93	0.806918	32.759	1
	High	SLKEsEQEsEEEILAQK	2	1	1	Q9BW71	S5(Phospho); S9(Phospho)	0	1.55216e+06	0.867785	1		0	0.0002775	13.19	17.2368	2	2136.9	1.19207	34.4253	1
	High	RPPtPcsDPER	3	1	1	Q9BW71	T4(Phospho); C6(Carbamidomethyl); S7(Phospho)	0	2.95319e+06	0.490542	2	24.4795	0	0.0008542	10.32	6.93938	2	1471.54	0.256657	19.6606	0
Q01581	Hydroxymethylglutaryl-CoA synthase, cytoplasmic OS=Homo sapiens GN=HMGCS1 PE=1 SV=2 - [HMCS1_HUMAN]	28.95	12.12	1	4	4	6	1.68596e+06	0.1307	6	88.1356	520	57.2574	5.41455
	A2	Sequence	# PSMs	# Proteins	# Protein Groups	Protein Group Accessions	Modifications	ΔCn	Area	Heavy/Light	Heavy/Light Count	Heavy/Light Variability [%]	q-Value	PEP	IonScore	Exp Value	Charge	MH+ [Da]	ΔM [ppm]	RT [min]	# Missed Cleavages
	High	TGVAPDVFAENmK	2	1	1	Q01581	M12(Oxidation)	0	740933	0.054963	2	680.903	0	0.008663	19.84	2.39358	2	1394.66	0.809734	34.5973	0
	High	RPTPNDDTLDEGVGLVHsNIATEHIPSPAK	2	1	1	Q01581	S18(Phospho)	0	3.73001e+06	0.0359372	2	252.395	0	6.691e-05	14.76	34.4472	4	3260.56	1.42882	46.0267	0
	High	LEVGTETIIDK	1	1	1	Q01581		0	586943	0.183234	1		0.003	0.02116	28.95	0.253937	2	1217.66	1.38692	36.312	0
	High	YTIGLGQAK	1	1	1	Q01581		0	426527	0.229774	1		0.006	0.04612	12.63	6.93658	2	950.53	-0.476965	32.6087	0
Q14157-4	Isoform 4 of Ubiquitin-associated protein 2-like OS=Homo sapiens GN=UBAP2L - [UBP2L_HUMAN]	27.8033	4.71	6	2	2	10	2.72688e+06	0.426918	7	25.6057	976	103.106	6.87354
	A2	Sequence	# PSMs	# Proteins	# Protein Groups	Protein Group Accessions	Modifications	ΔCn	Area	Heavy/Light	Heavy/Light Count	Heavy/Light Variability [%]	q-Value	PEP	IonScore	Exp Value	Charge	MH+ [Da]	ΔM [ppm]	RT [min]	# Missed Cleavages
	High	SPAVATSTAAPPPPSsPLPSK	3	6	1	Q14157-4	S16(Phospho)	0	1.40717e+06	0.232225	3	26.4653	0	6.711e-07	29.62	0.564275	2	2040.01	1.69516	31.9505	0
	High	STsAPQmSPGSSDNQSSSPQPAQQK	1	6	1	Q14157-4	S3(Phospho); M7(Oxidation)	0	4.0466e+06	0.45453	1		0	0.0004748	22.52	2.91102	3	2628.09	1.11459	18.6381	0
	High	STSAPQMSPGsSDNQSSSPQPAQQK	2	6	1	Q14157-4	S11(Phospho)	0	2.93112e+06	0.469157	1		0	1.255e-07	21.04	4.27169	3	2612.1	0.880443	23.1883	0
	High	STSAPQmsPGSSDNQSSSPQPAQQk	2	6	1	Q14157-4	M7(Oxidation); S8(Phospho); K25(Lys8)	0	1.61836e+06	0.426918	1		0	0.0002212	16.98	11.199	3	2636.11	1.3743	18.6993	0
	High	STSAPQMsPGSSDNQSSSPQPAQQk	2	6	1	Q14157-4	S8(Phospho); K25(Lys8)	0	1.18064e+06	0.506014	1		0	0.0005143	14.45	21.6125	3	2620.11	2.05096	24.4258	0
H0Y4E7	GTPase-activating protein and VPS9 domain-containing protein 1 (Fragment) OS=Homo sapiens GN=GAPVD1 PE=1 SV=1 - [H0Y4E7_HUMAN]	25.98	3.86	10	2	2	2	1.55901e+06	0.731674	2	1.69536	830	90.5257	4.91943
	A2	Sequence	# PSMs	# Proteins	# Protein Groups	Protein Group Accessions	Modifications	ΔCn	Area	Heavy/Light	Heavy/Light Count	Heavy/Light Variability [%]	q-Value	PEP	IonScore	Exp Value	Charge	MH+ [Da]	ΔM [ppm]	RT [min]	# Missed Cleavages
	High	EVSSRPstPGLSVVSGISATSEDIPNKIEDLR	1	10	1	H0Y4E7	S7(Phospho); T8(Phospho)	0	1.7906e+06	0.740088	1		0	0.001932	25.98	2.96761	4	3500.66	2.58362	54.8528	1
	High	EVSsRPsTPGLSVVSGISATSEDIPNK	1	10	1	H0Y4E7	S4(Phospho); S7(Phospho)	0	1.32741e+06	0.723355	1		0	0.0003851	12.84	45.9338	3	2874.32	1.34769	46.0967	0
Q14974	Importin subunit beta-1 OS=Homo sapiens GN=KPNB1 PE=1 SV=2 - [IMB1_HUMAN]	25.96	3.2	1	2	2	2	623301	0.631048	2	20.6341	876	97.108	4.77979
	A2	Sequence	# PSMs	# Proteins	# Protein Groups	Protein Group Accessions	Modifications	ΔCn	Area	Heavy/Light	Heavy/Light Count	Heavy/Light Variability [%]	q-Value	PEP	IonScore	Exp Value	Charge	MH+ [Da]	ΔM [ppm]	RT [min]	# Missed Cleavages
	High	VLANPGNSQVAr	1	1	1	Q14974	R12(Arg10)	0	462611	0.724229	1		0	1.602e-06	25.96	0.501448	2	1235.67	-0.154684	24.4122	0
	High	GDQENVHPDVmLVQPR	1	1	1	Q14974	M11(Oxidation)	0	783991	0.549855	1		0.006	0.03695	14.66	15.8713	3	1849.89	1.2469	32.7014	0
J3QSD7	Cyclin-dependent kinase 12 (Fragment) OS=Homo sapiens GN=CDK12 PE=1 SV=1 - [J3QSD7_HUMAN]	25.43	2.83	4	2	2	2	904574	0.458542	2	25.9138	1201	133.577	9.56885
	A2	Sequence	# PSMs	# Proteins	# Protein Groups	Protein Group Accessions	Modifications	ΔCn	Area	Heavy/Light	Heavy/Light Count	Heavy/Light Variability [%]	q-Value	PEP	IonScore	Exp Value	Charge	MH+ [Da]	ΔM [ppm]	RT [min]	# Missed Cleavages
	High	NSsPAPPQPAPGK	1	4	1	J3QSD7	S3(Phospho)	0	1.29048e+06	0.3861	1		0	0.004915	25.43	0.612218	2	1327.6	0.20148	20.6329	0
	High	HssISPVrLPLNSSLGAELSr	1	4	1	J3QSD7	S2(Phospho); S3(Phospho); R8(Arg10); R21(Arg10)	0	518665	0.544575	1		0.006	0.05281	12.12	42.7178	3	2400.16	1.11278	49.0964	1
P16949	Stathmin OS=Homo sapiens GN=STMN1 PE=1 SV=3 - [STMN1_HUMAN]	24.62	15.44	2	2	2	2	656837	0.589223	2	180.823	149	17.292	5.97314
	A2	Sequence	# PSMs	# Proteins	# Protein Groups	Protein Group Accessions	Modifications	ΔCn	Area	Heavy/Light	Heavy/Light Count	Heavy/Light Variability [%]	q-Value	PEP	IonScore	Exp Value	Charge	MH+ [Da]	ΔM [ppm]	RT [min]	# Missed Cleavages
	High	AsGQAFELILsPR	1	2	1	P16949	S2(Phospho); S11(Phospho)	0	471195	0.261433	1		0.001	0.0156	24.62	0.883568	2	1548.69	0.149498	51.5387	0
	High	AIEENNNFSk	1	2	1	P16949	K10(Lys8)	0	842479	1.328	1		0.006	0.04333	17.09	3.53345	2	1173.56	-0.0789913	23.3487	0
P07814	Bifunctional glutamate/proline--tRNA ligase OS=Homo sapiens GN=EPRS PE=1 SV=5 - [SYEP_HUMAN]	24.1633	4.43	2	3	3	5	2.10918e+06	0.517455	5	13.6661	1512	170.483	7.32764
	A2	Sequence	# PSMs	# Proteins	# Protein Groups	Protein Group Accessions	Modifications	ΔCn	Area	Heavy/Light	Heavy/Light Count	Heavy/Light Variability [%]	q-Value	PEP	IonScore	Exp Value	Charge	MH+ [Da]	ΔM [ppm]	RT [min]	# Missed Cleavages
	High	EYIPGQPPLSQSSDSsPTr	2	2	1	P07814	S16(Phospho); R19(Arg10)	0	4.73746e+06	0.541746	2	6.80935	0	0.001521	23.96	1.89685	2	2135.95	0.725475	36.015	0
	High	TGQEYKPGNPPAEIGQNISSNSSASILESK	1	2	1	P07814		0	1.11623e+06	0.398575	1		0	1.541e-08	22.36	5.05817	3	3103.52	1.40508	41.0428	0
	High	EYIPGQPPLsQSSDSsPTR	1	2	1	P07814	S10(Phospho); S16(Phospho)	0	2.75288e+06	0.473467	1		0	0.0007989	18.51	4.89305	2	2205.91	1.56331	37.8074	0
	High	NQGGGLSSSGAGEGQGPk	1	1	1	P07814	K18(Lys8)	0	473855	0.98383	1		0	0.005622	11.71	21.1566	2	1595.75	1.07553	20.3118	0
Q8WWM7-6	Isoform 6 of Ataxin-2-like protein OS=Homo sapiens GN=ATXN2L - [ATX2L_HUMAN]	23.86	5.99	9	2	2	5	5.93612e+06	0.01	3	0	968	102.831	8.63135
	A2	Sequence	# PSMs	# Proteins	# Protein Groups	Protein Group Accessions	Modifications	ΔCn	Area	Heavy/Light	Heavy/Light Count	Heavy/Light Variability [%]	q-Value	PEP	IonScore	Exp Value	Charge	MH+ [Da]	ΔM [ppm]	RT [min]	# Missed Cleavages
	High	TESVSDKEDKPPLAPSGGTEGPEQPPPPcPsQTGSPPVGLIK	1	9	1	Q8WWM7-6	C29(Carbamidomethyl); S31(Phospho)	0	8.36782e+06	0.01	1		0	0.007622	22.64	6.67016	4	4345.07	1.88092	40.2309	1
	High	GPPQsPVFEGVYNNSR	4	9	1	Q8WWM7-6	S5(Phospho)	0	3.50443e+06	0.01	2	0	0	1.53e-05	21.56	2.34711	2	1827.81	0.588834	39.8213	0
B4DS13	Eukaryotic translation initiation factor 4B OS=Homo sapiens GN=EIF4B PE=1 SV=1 - [B4DS13_HUMAN]	21.88	5.77	3	2	2	5	648274	0.795683	4	66.0232	572	64.7671	6.12549
	A2	Sequence	# PSMs	# Proteins	# Protein Groups	Protein Group Accessions	Modifications	ΔCn	Area	Heavy/Light	Heavy/Light Count	Heavy/Light Variability [%]	q-Value	PEP	IonScore	Exp Value	Charge	MH+ [Da]	ΔM [ppm]	RT [min]	# Missed Cleavages
	High	tGSESSQTGTSTTSSR	1	3	1	B4DS13	T1(Phospho)	0	115610	2.34114	1		0	0.006551	14.68	5.89417	2	1653.66	-0.0197089	13.9064	0
	High	TGsESSQTGTSTTSSr	2	3	1	B4DS13	S3(Phospho); R16(Arg10)	0	454100	1.01197	1		0.001	0.01001	13.93	6.73821	2	1663.67	1.24687	13.9152	0
	High	SQSSDtEQQSPTSGGGK	2	3	1	B4DS13	T6(Phospho)	0	842448	0.530329	2	24.8727	0.002	0.01749	12.71	8.82725	2	1760.7	0.801743	15.6369	0
H3BNW0	THUMP domain-containing protein 1 OS=Homo sapiens GN=THUMPD1 PE=1 SV=1 - [H3BNW0_HUMAN]	20.34	16.55	2	2	2	4	4.60635e+06	0.698563	3	11.3565	145	15.7518	7.09326
	A2	Sequence	# PSMs	# Proteins	# Protein Groups	Protein Group Accessions	Modifications	ΔCn	Area	Heavy/Light	Heavy/Light Count	Heavy/Light Variability [%]	q-Value	PEP	IonScore	Exp Value	Charge	MH+ [Da]	ΔM [ppm]	RT [min]	# Missed Cleavages
	High	FTDKDQQPsGsEGEDDDAEAALKK	2	2	1	H3BNW0	S9(Phospho); S11(Phospho)	0	7.71878e+06	0.729031	2	6.33577	0	0.0008313	20.34	3.89853	3	2741.09	0.748168	28.1108	2
	High	FTDkDQQPsGsEGEDDDAEAALkk	1	2	1	H3BNW0	K4(Lys8); S9(Phospho); S11(Phospho); K23(Lys8); K24(Lys8)	0	5.24496e+06				0.004	0.03126	12.97	25.0489	3	2765.13	-0.492431	28.0835	2
	High	FTDKDQQPsGsEGEDDDAEAALK	1	2	1	H3BNW0	S9(Phospho); S11(Phospho)	0	1.49393e+06	0.64721	1		0.005	0.03274	11.64	18.8921	3	2613	1.43861	30.5626	1

## Sheet: Cytoskeletal
Accession	Description	Score	Coverage	# Proteins	# Unique Peptides	# Peptides	# PSMs	Area	Heavy/Light	Heavy/Light Count	Heavy/Light Variability [%]	# AAs	MW [kDa]	calc. pI
P20700	Lamin-B1 OS=Homo sapiens GN=LMNB1 PE=1 SV=2 - [LMNB1_HUMAN]	977.264	38.91	1	19	20	72	8.47713e+06	0.904728	46	13.1189	586	66.3676	5.16064
	A2	Sequence	# PSMs	# Proteins	# Protein Groups	Protein Group Accessions	Modifications	ΔCn	Area	Heavy/Light	Heavy/Light Count	Heavy/Light Variability [%]	q-Value	PEP	IonScore	Exp Value	Charge	MH+ [Da]	ΔM [ppm]	RT [min]	# Missed Cleavages
	High	ALYETELADAr	3	1	1	P20700	R11(Arg10)	0	3.02614e+06	0.805629	2	11.5611	0	1.481e-08	77.74	4.07039e-06	2	1261.63	0.813767	34.5589	0
	High	IESLSSQLSNLQK	3	1	1	P20700		0	8.52314e+06	1.04641	3	0.438047	0	3.337e-06	75.95	6.72341e-06	2	1446.78	1.47135	39.6707	0
	High	ALYETELADAR	3	1	1	P20700		0	3.55172e+06	0.811001	1		0	1.996e-09	70.94	1.79036e-05	2	1251.62	0.502293	34.5698	0
	High	LSSEMNTSTVNSAr	3	1	1	P20700	R14(Arg10)	0	2.19823e+06	0.929268	1		0	4.683e-05	68.03	4.69991e-05	2	1506.71	0.726382	25.0229	0
	High	LSSEMNTSTVNSAR	3	1	1	P20700		0	2.42462e+06	0.936174	2	9.91199	0	2.158e-07	62.62	0.000151496	2	1496.7	0.954683	24.9736	0
	High	DAALATALGDkk	3	1	1	P20700	K11(Lys8); K12(Lys8)	0	2.80163e+06	0.866862	2	2.85354	0	0.004365	56.47	0.000370935	2	1189.68	0.393241	28.0774	1
	High	DAALATALGDKK	3	1	1	P20700		0	3.29471e+06	0.939109	1		0	1.318e-08	53.62	0.000805799	2	1173.65	0.152777	27.7913	1
	High	LSSEmNTSTVNSAR	4	1	1	P20700	M5(Oxidation)	0	2.18207e+06	1.03699	3	2.75233	0	0.0009651	49.51	0.00319544	2	1512.7	1.64313	19.3499	0
	High	DQmQQQLNDYEQLLDVK	4	1	1	P20700	M3(Oxidation)	0	2.32663e+06	0.87163	2	5.5768	0	7.546e-09	46.36	0.0124562	2	2123.99	-0.0931095	49.0489	0
	High	DQmQQQLNDYEQLLDVk	3	1	1	P20700	M3(Oxidation); K17(Lys8)	0	2.14646e+06	0.895774	1		0	2.269e-08	44.66	0.0197322	2	2132.01	1.03414	48.6579	0
	High	NQNSWGTGEDVk	2	1	1	P20700	K12(Lys8)	0	7.28226e+06	0.970722	1		0	0.0003205	38.48	0.0299421	2	1342.61	1.08018	24.6371	0
	High	AEHDQLLLNYAk	3	1	1	P20700	K12(Lys8)	0	975010	0.904441	3	42.8979	0	0.001171	37.68	0.0474376	2	1422.75	0.258381	34.8673	0
	High	NQNSWGTGEDVK	3	1	1	P20700		0	7.52948e+06	0.970095	2	1.46207	0	0.0006059	36.18	0.0438844	2	1334.6	0.658445	24.2466	0
	High	LrEYEAALNSk	1	1	1	P20700	R2(Arg10); K11(Lys8)	0	1.72479e+06	0.912193	1		0	0.001223	35.42	0.0671476	2	1311.7	0.137895	25.4814	1
	High	QLADETLLK	3	1	1	P20700		0	3.30904e+06	0.866313	3	9.49491	0	0.001198	35.02	0.0477199	2	1030.58	0.925422	33.8002	0
	High	IQELEDLLAk	3	1	1	P20700	K10(Lys8)	0	2.21657e+06	0.839939	2	9.19008	0	0.0007696	33.95	0.0666497	2	1179.67	0.0422803	44.5974	0
	High	LYkEELEQTYHAk	2	1	1	P20700	K3(Lys8); K13(Lys8)	0	2.33862e+06	1.00703	1		0	0.0005279	31.22	0.257298	3	1667.86	0.736574	27.6942	1
	High	NTSEQDQPmGGWEmIR	2	1	1	P20700	M9(Oxidation); M14(Oxidation)	0	1.47217e+06	0.774487	1		0	1.708e-05	29.59	0.335087	2	1910.8	1.39894	32.5377	0
	High	LYKEELEQTYHAK	3	1	1	P20700		0	2.92857e+06	0.865687	2	14.4358	0	0.000285	27.72	0.630112	3	1651.83	0.0148041	27.7184	1
	High	SLETENSALQLQVTEr	1	1	1	P20700	R16(Arg10)	0	143130	0.605393	1		0	1.246e-05	22.46	2.36013	2	1827.94	1.8076	38.9532	0
	High	LSSEmNTSTVNSAr	2	1	1	P20700	M5(Oxidation); R14(Arg10)	0	2.22116e+06				0	0.001397	19.25	3.40744	2	1522.7	0.370533	18.8026	0
	High	cQSLTEDLEFr	2	1	1	P20700	C1(Carbamidomethyl); R11(Arg10)	0	306408	0.884704	2	4.57458	0	0.005155	18.76	2.89507	2	1407.65	1.0838	41.5056	0
	High	AGGPTTPLSPTr	2	1	1	P20700	R12(Arg10)	0	6.46335e+06	0.584674	2	9.9461	0.001	0.007697	21.29	1.317	2	1164.63	0.368676	25.283	0
	High	LLEGEEEr	1	3	2	P20700;Q03252	R8(Arg10)	0	9.37876e+06	0.799612	1		0.002	0.008722	29.81	0.132993	2	984.487	-0.0722399	21.0326	0
	High	LREYEAALNSK	1	1	1	P20700		0	1.87349e+06				0.002	0.009298	24.12	0.982473	2	1293.68	0.333993	25.4314	1
	High	NSQGEEVAQr	1	1	1	P20700	R10(Arg10)	0	1.0861e+06	0.821423	1		0.002	0.01616	21.16	1.21347	2	1127.53	-0.124725	16.0617	0
	High	NSQGEEVAQR	1	1	1	P20700		0	1.99829e+06	1.00865	1		0.002	0.0113	20.74	1.20344	2	1117.52	0.0641852	15.527	0
	High	IESLSSQLSNLQk	1	1	1	P20700	K13(Lys8)	0	8.45485e+06				0.002	0.0158	15.16	7.69898	2	1454.79	0.513546	39.2302	0
	High	IQELEDLLAK	2	1	1	P20700		0	2.68046e+06	0.850221	1		0.003	0.01968	24.47	0.641305	2	1171.66	0.38828	44.592	0
	High	AEHDQLLLNYAK	1	1	1	P20700		0	948015				0.003	0.01969	10.7	23.7425	2	1414.73	0.459872	34.5817	0
	High	SmYEEEINETR	1	1	1	P20700	M2(Oxidation)	0	533514	0.95574	1		0.004	0.02334	15.3	4.7485	2	1416.59	-0.0226873	26.3155	0
	High	kQLADETLLk	1	1	1	P20700	K1(Lys8); K10(Lys8)	0	1.35833e+06	0.957869	1		0.006	0.03248	28.38	0.166412	2	1174.7	0.850264	29.1813	1
	High	IGDTSVSYK	1	1	1	P20700		0	2.85998e+06	0.997483	1		0.008	0.04981	20.87	1.1614	2	969.488	-0.529647	23.2995	0
P25705	ATP synthase subunit alpha, mitochondrial OS=Homo sapiens GN=ATP5A1 PE=1 SV=1 - [ATPA_HUMAN]	761.913	25.14	1	11	11	49	4.29178e+06	0.97726	26	19.1852	553	59.7136	9.12939
	A2	Sequence	# PSMs	# Proteins	# Protein Groups	Protein Group Accessions	Modifications	ΔCn	Area	Heavy/Light	Heavy/Light Count	Heavy/Light Variability [%]	q-Value	PEP	IonScore	Exp Value	Charge	MH+ [Da]	ΔM [ppm]	RT [min]	# Missed Cleavages
	High	ILGADTSVDLEETGR	4	1	1	P25705		0	892375	1.11683	1		0	1.009e-06	73.12	1.7395e-05	2	1575.79	1.34175	37.4496	0
	High	ILGADTSVDLEETGr	4	1	1	P25705	R15(Arg10)	0	998403	1.00458	2	22.6014	0	3.229e-10	68.52	5.05685e-05	2	1585.8	2.431	37.7996	0
	High	VVDALGNAIDGK	3	1	1	P25705		0	4.23427e+06	1.01626	1		0	4.308e-10	67.58	3.2577e-05	2	1171.63	0.174378	33.7948	0
	High	VVDALGNAIDGk	3	1	1	P25705	K12(Lys8)	0	4.30312e+06	0.963247	2	4.10955	0	3.358e-05	64.37	6.4107e-05	2	1179.65	0.554186	33.3899	0
	High	VLSIGDGIAr	3	1	1	P25705	R10(Arg10)	0	4.53871e+06	1.04155	3	7.85125	0	1.271e-05	51.73	0.000816457	2	1010.59	0.241906	34.6993	0
	High	TSIAIDTIINQK	3	1	1	P25705		0	1.62187e+06	1.24591	1		0	3.907e-06	47.99	0.00312229	2	1316.74	0.780935	41.7096	0
	High	AVDSLVPIGR	2	1	1	P25705		0	3.86587e+06	0.881484	2	11.1454	0	2.924e-06	47.78	0.00197902	2	1026.59	0.242277	36.9309	0
	High	TSIAIDTIINQk	3	1	1	P25705	K12(Lys8)	0	1.77336e+06	1.03845	2	6.7205	0	0.005533	47.17	0.00337973	2	1324.76	-0.727438	41.6691	0
	High	TGAIVDVPVGEELLGr	4	1	1	P25705	R16(Arg10)	0	2.15012e+06	0.843632	2	4.21642	0	1.653e-07	46.19	0.00637036	2	1634.9	-0.211145	49.9956	0
	High	HALIIYDDLSK	1	1	1	P25705		0	1.90303e+06	0.751566	1		0	4.824e-06	40.48	0.0201099	2	1287.69	0.00950245	37.5817	0
	High	VLSIGDGIAR	3	1	1	P25705		0	4.70633e+06				0	0.001046	39.82	0.0114655	2	1000.58	0.456562	34.6651	0
	High	TGAIVDVPVGEELLGR	4	1	1	P25705		0	2.21554e+06	0.91822	1		0	3.362e-05	37.9	0.0444863	2	1624.89	-1.65939	49.9818	0
	High	HALIIYDDLSk	3	1	1	P25705	K11(Lys8)	0	1.46919e+06	8.84298	2	64291.9	0	0.001265	33.88	0.0893211	2	1295.71	0.638943	37.5873	0
	High	EAYPGDVFYLHSr	1	1	1	P25705	R13(Arg10)	0	499082	1.07443	1		0	0.0001658	33.51	0.138555	2	1563.75	1.79501	40.0271	0
	High	TGTAEmSSILEER	2	1	1	P25705	M6(Oxidation)	0	821546	0.973024	2	24.2194	0	0.0001926	32.3	0.161579	2	1439.67	1.14135	28.9814	0
	High	GmSLNLEPDNVGVVVFGNDK	2	1	1	P25705	M2(Oxidation)	0	268737	0.0222451	1		0	2.496e-05	30.13	0.559159	2	2120.03	0.825113	49.9371	0
	High	EAYPGDVFYLHSR	2	1	1	P25705		0	574084	1.13076	1		0	0.00177	28.55	0.420167	2	1553.74	0.293376	40.091	0
	High	APGIIPr	1	1	1	P25705	R7(Arg10)	0	1.01516e+06	0.686121	1		0.008	0.05303	22.41	0.32495	2	733.46	0.193638	26.9665	0
	High	TGTAEmSSILEEr	1	1	1	P25705	M6(Oxidation); R13(Arg10)	0	680486				0.008	0.05337	18.44	3.88839	2	1449.68	0.229142	29.3781	0
P62805	Histone H4 OS=Homo sapiens GN=HIST1H4A PE=1 SV=2 - [H4_HUMAN]	685.77	51.46	1	6	6	34	4.68361e+07	0.936613	18	6.41376	103	11.3604	11.356
	A2	Sequence	# PSMs	# Proteins	# Protein Groups	Protein Group Accessions	Modifications	ΔCn	Area	Heavy/Light	Heavy/Light Count	Heavy/Light Variability [%]	q-Value	PEP	IonScore	Exp Value	Charge	MH+ [Da]	ΔM [ppm]	RT [min]	# Missed Cleavages
	High	ISGLIYEETr	3	1	1	P62805	R10(Arg10)	0	5.85387e+07	0.960593	1		0	1.991e-09	61.91	0.000126579	2	1190.63	0.561082	34.2665	0
	High	ISGLIYEETR	3	1	1	P62805		0	5.94664e+07	0.961045	2	3.32898	0	1.616e-05	59.85	0.000199782	2	1180.62	0.125339	34.272	0
	High	DNIQGITkPAIr	6	1	1	P62805	K8(Lys8); R12(Arg10)	0	3.54079e+07	0.819455	6	1.24457	0	3.379e-06	58.55	0.000202404	2	1343.78	1.40827	29.6824	0
	High	VFLENVIr	3	1	1	P62805	R8(Arg10)	0	3.60024e+07	0.949713	2	2.24168	0	0.00031	55.3	0.000352374	2	999.586	0.130028	42.2873	0
	High	TVTAmDVVYALk	4	1	1	P62805	M5(Oxidation); K12(Lys8)	0	1.29011e+07	0.918315	2	3.12034	0	3.681e-05	49.16	0.00273741	2	1334.71	0.160552	42.6221	0
	High	DNIQGITKPAIR	5	1	1	P62805		0	4.34455e+07				0	1.346e-08	47.55	0.00301572	3	1325.75	0.110514	29.3238	0
	High	TVTAmDVVYALK	5	1	1	P62805	M5(Oxidation)	0	1.49099e+07	0.927364	2	5.30178	0	0.0004007	40.67	0.0204746	2	1326.7	1.20292	42.3214	0
	High	VFLENVIR	3	1	1	P62805		0	3.75965e+07	0.937765	1		0.001	0.006595	50.99	0.000904835	2	989.578	0.469295	41.9232	0
	High	DAVTYTEHAk	1	1	1	P62805	K10(Lys8)	0	8.42015e+06	0.952103	1		0.003	0.01868	28.42	0.249991	2	1142.56	0.106834	19.0964	0
	High	kTVTAmDVVYALk	1	1	1	P62805	K1(Lys8); M6(Oxidation); K13(Lys8)	0	769693	1.61085	1		0.008	0.05007	11.82	13.8174	2	1470.82	1.86265	38.6385	1
P04264	Keratin, type II cytoskeletal 1 OS=Homo sapiens GN=KRT1 PE=1 SV=6 - [K2C1_HUMAN]	641.897	19.57	1	9	10	31	1.69021e+07	0.01	29	0	644	65.999	8.11865
	A2	Sequence	# PSMs	# Proteins	# Protein Groups	Protein Group Accessions	Modifications	ΔCn	Area	Heavy/Light	Heavy/Light Count	Heavy/Light Variability [%]	q-Value	PEP	IonScore	Exp Value	Charge	MH+ [Da]	ΔM [ppm]	RT [min]	# Missed Cleavages
	High	QISNLQQSISDAEQR	4	1	1	P04264		0	1.38009e+06	0.01	3	0	0	1.248e-08	75.88	1.06454e-05	2	1716.85	1.95619	36.4113	0
	High	YEELQITAGR	3	1	1	P04264		0	1.60461e+06	0.01	3	0	0	1.846e-09	69.37	2.36945e-05	2	1179.6	0.654957	32.2296	0
	High	FLEQQNQVLQTK	4	2	2	P04264;P35908		0	5.30234e+06	0.01	3	0	0	2.932e-06	64.19	0.000104107	2	1475.79	0.416707	32.0811	0
	High	GGGGGGYGSGGSSYGSGGGSYGSGGGGGGGR	5	1	1	P04264		0	1.79771e+06	0.01	5	0	0	2.627e-12	55.77	0.000908436	2	2383.96	1.52801	23.4238	0
	High	SGGGFSSGSAGIINYQR	3	1	1	P04264		0	2.13511e+06	0.01	3	0	0	7.304e-06	51.95	0.00239955	2	1657.8	1.73885	35.5481	0
	High	SISISVAR	2	1	1	P04264		0	2.08571e+07	0.01	2	0	0	0.003337	43.17	0.00462429	2	832.489	0.469683	28.9557	0
	High	SLVNLGGSK	2	1	1	P04264		0	2.4547e+07	0.01	2	0	0	0.003803	41.02	0.00788307	2	874.499	-0.333104	28.8214	0
	High	TNAENEFVTIK	3	1	1	P04264		0	1.08047e+06	0.01	3	0	0	4.878e-05	39.2	0.0303271	2	1265.64	0.766327	33.5079	0
	High	SLNNQFASFIDK	2	1	1	P04264		0	815535	0.01	2	0	0	0.0004364	27.42	0.50627	2	1383.69	0.524928	45.4393	0
	High	TNAENEFVTIKK	3	1	1	P04264		0	1.59331e+06	0.01	3	0	0	0.0004245	22.43	1.4947	3	1393.73	0.336412	28.8008	1
H0YH81	ATP synthase subunit beta (Fragment) OS=Homo sapiens GN=ATP5B PE=1 SV=1 - [H0YH81_HUMAN]	635.888	41.16	2	11	11	57	2.68933e+06	0.82117	33	14.6157	362	38.2249	5.5542
	A2	Sequence	# PSMs	# Proteins	# Protein Groups	Protein Group Accessions	Modifications	ΔCn	Area	Heavy/Light	Heavy/Light Count	Heavy/Light Variability [%]	q-Value	PEP	IonScore	Exp Value	Charge	MH+ [Da]	ΔM [ppm]	RT [min]	# Missed Cleavages
	High	FTQAGSEVSALLGr	4	2	1	H0YH81	R14(Arg10)	0	2.257e+06	1.04383	2	1.19244	0	1.802e-10	82.12	1.72007e-06	2	1445.76	0.299227	44.4442	0
	High	FTQAGSEVSALLGR	3	2	1	H0YH81		0	2.20186e+06	0.996236	1		0	4.199e-08	80.27	2.6176e-06	2	1435.76	0.95935	44.0376	0
	High	ImDPNIVGSEHYDVAr	3	2	1	H0YH81	M2(Oxidation); R16(Arg10)	0	2.34399e+06	0.904157	2	8.65245	0	4.332e-05	50.92	0.00349732	3	1841.87	0.61793	33.3375	0
	High	IGLFGGAGVGK	3	2	1	H0YH81		0	2.41489e+06	0.971012	3	8.89203	0	3.229e-05	50.68	0.00102736	2	975.562	0.230906	38.3222	0
	High	AIAELGIYPAVDPLDSTSr	4	2	1	H0YH81	R19(Arg10)	0	1.3484e+06	0.818233	1		0	5.412e-06	49.69	0.00433999	2	1998.04	1.43392	51.2976	0
	High	ImDPNIVGSEHYDVAR	3	2	1	H0YH81	M2(Oxidation)	0	2.38393e+06	0.968209	1		0	4.149e-07	46.75	0.00879951	3	1831.87	0.570638	33.7286	0
	High	ImNVIGEPIDEr	3	2	1	H0YH81	M2(Oxidation); R12(Arg10)	0	1.18131e+06	0.775188	3	21.1219	0	0.001616	44.07	0.0107161	2	1411.71	1.45349	34.366	0
	High	VVDLLAPYAk	1	2	1	H0YH81	K10(Lys8)	0	2.22909e+06	0.851446	1		0	0.0002269	43.41	0.00535615	2	1096.65	0.0631842	42.1034	0
	High	IPVGPETLGr	3	2	1	H0YH81	R10(Arg10)	0	3.26917e+06	0.665435	3	1.48889	0	0.00145	41.17	0.0100979	2	1048.6	0.267501	32.8957	0
	High	AIAELGIYPAVDPLDSTSR	3	2	1	H0YH81		0	1.73971e+06	0.776928	2	0.354449	0	1.756e-06	40.45	0.0367616	2	1988.04	4.00404	51.6429	0
	High	TIAmDGTEGLVr	2	2	1	H0YH81	M4(Oxidation); R12(Arg10)	0	2.04367e+06	1.11714	2	2.58017	0	0.0003817	37.72	0.0418638	2	1288.65	0.692068	29.7479	0
	High	VALVYGQmNEPPGAr	2	2	1	H0YH81	M8(Oxidation); R15(Arg10)	0	1.40941e+06	0.684527	2	13.1157	0	0.0002709	35.65	0.097922	2	1627.82	1.08857	31.573	0
	High	IGLFGGAGVGk	1	2	1	H0YH81	K11(Lys8)	0	2.2993e+06				0	0.001199	35.03	0.0300704	2	983.577	0.375695	38.2877	0
	High	ImNVIGEPIDER	3	2	1	H0YH81	M2(Oxidation)	0	1.41042e+06				0	9.891e-05	31.61	0.188815	2	1401.7	0.221974	34.4116	0
	High	IPSAVGYQPTLATDmGTmQER	5	2	1	H0YH81	M15(Oxidation); M18(Oxidation)	0	1.76844e+06	0.767039	4	3.4511	0	2.201e-06	24.56	2.19258	2	2298.08	2.37857	36.5028	0
	High	TIAMDGTEGLVR	2	2	1	H0YH81		0	537364	0.815604	2	12.4924	0	0.001048	24.43	0.890088	2	1262.64	-0.0590513	35.887	0
	High	IPSAVGYQPTLATDmGTmQEr	5	2	1	H0YH81	M15(Oxidation); M18(Oxidation); R21(Arg10)	0	1.2971e+06	0.757291	1		0	0.002151	20.94	5.53255	2	2308.09	3.96866	36.5092	0
	High	VALVYGQmNEPPGAR	3	2	1	H0YH81	M8(Oxidation)	0	2.11553e+06	0.919125	1		0	0.005416	19.69	3.76218	2	1617.81	1.67929	31.249	0
	High	TIAMDGTEGLVr	1	2	1	H0YH81	R12(Arg10)	0	472001				0	0.003042	16.04	5.69824	2	1272.65	1.88475	35.8757	0
	High	VLDSGAPIK	2	2	1	H0YH81		0	1.71742e+06	0.82117	1		0.006	0.03288	29.52	0.106046	2	899.52	0.327725	24.7827	0
	High	VLDSGAPIk	1	2	1	H0YH81	K9(Lys8)	0	1.3862e+06	0.777343	1		0.007	0.04347	34.09	0.0377464	2	907.534	-0.0542401	24.8361	0
P10809	60 kDa heat shock protein, mitochondrial OS=Homo sapiens GN=HSPD1 PE=1 SV=2 - [CH60_HUMAN]	617.666	16.75	1	8	8	33	3.28604e+06	1.05699	19	7.21931	573	61.0164	5.87158
	A2	Sequence	# PSMs	# Proteins	# Protein Groups	Protein Group Accessions	Modifications	ΔCn	Area	Heavy/Light	Heavy/Light Count	Heavy/Light Variability [%]	q-Value	PEP	IonScore	Exp Value	Charge	MH+ [Da]	ΔM [ppm]	RT [min]	# Missed Cleavages
	High	LVQDVANNTNEEAGDGTTTATVLAR	8	1	1	P10809		0	5.02254e+06	1.09808	4	2.27279	0	5.76217e-18	100.15	7.07536e-08	2	2560.25	2.0711	36.036	0
	High	LVQDVANNTNEEAGDGTTTATVLAr	7	1	1	P10809	R25(Arg10)	0	5.10732e+06	0.979728	2	8.37763	0	5.491e-14	76.09	1.85635e-05	2	2570.26	0.17567	35.5826	0
	High	VGLQVVAVK	3	1	1	P10809		0	2.3175e+06	1.00681	1		0	1.039e-05	63.34	2.10868e-05	2	912.588	-0.241426	33.3059	0
	High	VGLQVVAVk	3	1	1	P10809	K9(Lys8)	0	2.41337e+06	1.0563	2	0.0965795	0	8.264e-05	54.02	0.000118685	2	920.602	-0.414117	33.3769	0
	High	NAGVEGSLIVEk	1	1	1	P10809	K12(Lys8)	0	738087	1.62463	1		0	0.0009954	37.95	0.0309346	2	1223.67	0.463188	32.0943	0
	High	TVIIEQSWGSPk	2	1	1	P10809	K12(Lys8)	0	1.72707e+06				0	0.003636	34.96	0.0786395	2	1352.73	0.615244	36.688	0
	High	VTDALNATR	2	1	1	P10809		0	2.33744e+06	1.01132	2	7.97355	0	0.0002159	19.43	1.46465	2	960.511	0.424568	21.3548	0
	High	LSDGVAVLk	2	1	1	P10809	K9(Lys8)	0	2.06847e+06	1.08568	2	14.1894	0.001	0.005889	42.23	0.00469155	2	909.549	-0.350025	30.6236	0
	High	TVIIEQSWGSPK	2	1	1	P10809		0	1.5727e+06	1.06769	2	8.64981	0.001	0.006113	39.07	0.0286596	2	1344.72	1.10169	36.7589	0
	High	VGEVIVTK	1	1	1	P10809		0	1.32005e+06	1.02591	1		0.002	0.01518	34.58	0.0273967	2	844.514	-0.275734	24.1055	0
	High	GYISPYFINTSk	2	1	1	P10809	K12(Lys8)	0	1.7561e+06	1.00622	2	7.76282	0.002	0.009624	18.38	3.93958	2	1397.72	0.467806	41.5987	0
P60709	Actin, cytoplasmic 1 OS=Homo sapiens GN=ACTB PE=1 SV=1 - [ACTB_HUMAN]	574.354	31.47	2	9	9	54	1.29962e+07	0.824409	29	14.1838	375	41.7097	5.47803
	A2	Sequence	# PSMs	# Proteins	# Protein Groups	Protein Group Accessions	Modifications	ΔCn	Area	Heavy/Light	Heavy/Light Count	Heavy/Light Variability [%]	q-Value	PEP	IonScore	Exp Value	Charge	MH+ [Da]	ΔM [ppm]	RT [min]	# Missed Cleavages
	High	DLYANTVLSGGTTmYPGIADR	6	2	1	P60709	M14(Oxidation)	0	1.67391e+06	0.868523	5	19.4821	0	2.321e-13	77.85	9.97971e-06	2	2231.07	1.76102	45.5648	0
	High	GYSFTTTAER	3	2	1	P60709		0	1.29979e+07	1.07808	2	0.674113	0	1.665e-07	75.58	4.21405e-06	2	1132.53	0.271939	28.5777	0
	High	GYSFTTTAEr	3	2	1	P60709	R10(Arg10)	0	1.39492e+07	1.09051	1		0	4.004e-05	56.63	0.000346872	2	1142.54	0.297373	28.5598	0
	High	SYELPDGQVITIGNEr	4	2	1	P60709	R16(Arg10)	0	2.95933e+06	0.758851	2	0.609066	0	2.062e-06	51.23	0.00329706	2	1800.9	0.912192	45.811	0
	High	VAPEEHPVLLTEAPLNPK	6	2	1	P60709		0	1.90897e+07	0.553781	5	7.05852	0	5.489e-06	46.23	0.00671338	2	1954.07	1.06169	39.813	0
	High	DLYANTVLSGGTTmYPGIADr	4	2	1	P60709	M14(Oxidation); R21(Arg10)	0	1.36355e+06				0	5.051e-08	45.85	0.0163927	2	2241.07	0.569008	45.5469	0
	High	QEYDESGPSIVHr	5	2	1	P60709	R13(Arg10)	0	2.10665e+06	0.895705	4	3.00219	0	1.427e-05	40.93	0.0227358	3	1526.71	-0.265523	26.3812	0
	High	AGFAGDDAPR	2	2	1	P60709		0	5.94962e+06	0.824409	1		0	2.543e-05	39.04	0.0136401	2	976.448	-0.188012	22.4739	0
	High	AGFAGDDAPr	3	2	1	P60709	R10(Arg10)	0	4.98041e+06	0.784101	2	1.93477	0	0.0001387	37.3	0.0189374	2	986.456	-0.21576	22.0336	0
	High	QEYDESGPSIVHR	3	2	1	P60709		0	2.3213e+06	0.890797	1		0	0.000102	35.64	0.0718131	3	1516.7	-0.690649	26.6742	0
	High	SYELPDGQVITIGNER	5	2	1	P60709		0	4.17815e+06	0.749551	1		0	0.0005657	34.97	0.137939	2	1790.89	0.967705	46.4714	0
	High	VAPEEHPVLLTEAPLNPk	4	2	1	P60709	K18(Lys8)	0	9.5932e+06	0.595512	1		0	0.0003135	29.95	0.252591	2	1962.08	1.97078	39.4302	0
	High	EITALAPSTmK	1	2	1	P60709	M10(Oxidation)	0	5.18715e+06	0.874195	1		0.002	0.009018	19.16	2.19199	2	1177.61	0.382833	27.4455	0
	High	EITALAPSTmk	2	2	1	P60709	M10(Oxidation); K11(Lys8)	0	4.61695e+06	0.758227	1		0.002	0.01458	17.84	3.16788	2	1185.63	0.5534	27.4628	0
	High	DSYVGDEAQSk	1	2	1	P60709	K11(Lys8)	0	2.83833e+06	1.0885	1		0.004	0.02496	14.3	5.9297	2	1206.54	-0.349728	20.4171	0
	High	DSYVGDEAQSK	1	2	1	P60709		0	1.80319e+06				0.006	0.03658	11.61	9.38381	2	1198.52	0.291448	20.8568	0
	High	DLTDYLmk	1	2	1	P60709	M7(Oxidation); K8(Lys8)	0	1.46789e+06	0.866726	1		0.009	0.05565	24.73	0.470443	2	1022.5	0.183636	38.0451	0
P11142	Heat shock cognate 71 kDa protein OS=Homo sapiens GN=HSPA8 PE=1 SV=1 - [HSP7C_HUMAN]	513.912	19.5	1	7	9	40	1.76651e+06	0.888102	23	16.4848	646	70.8542	5.51611
	A2	Sequence	# PSMs	# Proteins	# Protein Groups	Protein Group Accessions	Modifications	ΔCn	Area	Heavy/Light	Heavy/Light Count	Heavy/Light Variability [%]	q-Value	PEP	IonScore	Exp Value	Charge	MH+ [Da]	ΔM [ppm]	RT [min]	# Missed Cleavages
	High	TTPSYVAFTDTER	3	1	1	P11142		0	1.76092e+06	0.878626	3	0.380923	0	1.164e-05	66.45	6.52444e-05	2	1487.7	0.5947	35.6272	0
	High	IINEPTAAAIAYGLDK	4	2	2	P11021;P11142		0	1.44632e+06	0.741568	3	14.3146	0	8.401e-10	54.92	0.000924286	2	1659.9	2.36534	45.3365	0
	High	VEIIANDQGNR	2	2	2	P11021;P11142		0	2.01939e+06	0.974295	1		0	0.0001006	52.17	0.00136667	2	1228.63	0.197128	24.9154	0
	High	SQIHDIVLVGGSTr	3	1	1	P11142	R14(Arg10)	0	561242	1.03597	3	2.67388	0	1.742e-07	46.07	0.00585304	2	1491.82	-0.0302209	33.7394	0
	High	IINEPTAAAIAYGLDk	3	2	2	P11021;P11142	K16(Lys8)	0	1.07335e+06				0	3.866e-06	44.26	0.0105311	2	1667.91	-1.98738	45.2441	0
	High	NQVAmNPTNTVFDAK	3	1	1	P11142	M5(Oxidation)	0	1.40459e+06	0.813666	3	8.32575	0	3.395e-05	42.9	0.0180271	2	1665.79	0.678995	32.3944	0
	High	TTPSYVAFTDTEr	3	1	1	P11142	R13(Arg10)	0	1.54719e+06				0	0.001797	39.96	0.029667	2	1497.71	0.937964	35.7276	0
	High	DAGTIAGLNVLr	2	1	1	P11142	R12(Arg10)	0	1.5192e+06	1.08348	2	1.72412	0	3.486e-05	39.94	0.016983	2	1209.68	0.658774	43.6066	0
	High	NSLESYAFNmk	1	1	1	P11142	M10(Oxidation); K11(Lys8)	0	427123	0.888102	1		0	0.001178	34.33	0.0789612	2	1327.61	1.25742	35.3222	0
	High	NQVAmNPTNTVFDAk	3	1	1	P11142	M5(Oxidation); K15(Lys8)	0	1.18662e+06				0	9.229e-07	31.68	0.252596	2	1673.81	1.16305	32.0653	0
	High	SQIHDIVLVGGSTR	3	1	1	P11142		0	573385				0	4.184e-06	27.67	0.406471	2	1481.81	1.43095	34.1364	0
	High	TVTNAVVTVPAYFNDSQR	2	1	1	P11142		0	1.07196e+06	0.859053	2	10.3797	0	0.002701	26.6	1.01206	2	1982	1.78561	43.928	0
	High	TVTNAVVTVPAYFNDSQr	1	1	1	P11142	R18(Arg10)	0	704978	0.741676	1		0	0.003368	19.37	5.26436	2	1992.01	-0.290932	44.1999	0
	High	STAGDTHLGGEDFDNR	2	1	1	P11142		0	762675	1.13791	2	11.3518	0	0.002969	13.94	10.295	3	1691.73	0.336426	26.6709	0
	High	VEIIANDQGNr	2	2	2	P11021;P11142	R11(Arg10)	0	1.96748e+06	0.945387	1		0.001	0.007745	30.22	0.238935	2	1238.64	0.713954	24.6021	0
	High	DAGTIAGLNVLR	2	1	1	P11142		0	1.33157e+06	1.00319	1		0.001	0.007824	20.74	1.38349	2	1199.67	0.33252	43.1658	0
	High	STAGDTHLGGEDFDNr	1	1	1	P11142	R16(Arg10)	0	936681				0.001	0.007775	11.87	16.6368	3	1701.74	0.711788	26.6645	0
P13645	Keratin, type I cytoskeletal 10 OS=Homo sapiens GN=KRT10 PE=1 SV=6 - [K1C10_HUMAN]	489.494	17.12	1	10	10	22	6.1072e+06	0.01	20	0	584	58.7917	5.21143
	A2	Sequence	# PSMs	# Proteins	# Protein Groups	Protein Group Accessions	Modifications	ΔCn	Area	Heavy/Light	Heavy/Light Count	Heavy/Light Variability [%]	q-Value	PEP	IonScore	Exp Value	Charge	MH+ [Da]	ΔM [ppm]	RT [min]	# Missed Cleavages
	High	GSLGGGFSSGGFSGGSFSR	4	1	1	P13645		0	8.4227e+06	0.01	3	0	0	1.84e-10	92.8	1.80324e-07	2	1707.78	1.6634	40.2396	0
	High	ISSSKGSLGGGFSSGGFSGGSFSR	3	1	1	P13645		0	2.82194e+06	0.01	3	0	0	9.022e-13	72.99	3.03063e-05	3	2210.05	0.87248	37.7369	1
	High	ALEESNYELEGK	3	1	1	P13645		0	1.6355e+06	0.01	3	0	0	2.377e-09	70.7	2.03465e-05	2	1381.65	1.78125	29.795	0
	High	LENEIQTYR	3	1	1	P13645		0	2.27737e+06	0.01	3	0	0	0.0007684	44.22	0.0071677	2	1165.58	-0.0402411	27.6655	0
	High	SLLEGEGSSGGGGR	3	1	1	P13645		0	5.16012e+06	0.01	3	0	0	0.000133	32.47	0.114352	2	1262.6	1.06688	23.8127	0
	High	VLDELTLTK	2	1	1	P13645		0	1.03213e+06	0.215338	1		0	0.003819	30.09	0.115237	2	1031.6	-0.154295	36.846	0
	High	SQYEQLAEQNR	1	1	1	P13645		0	795447	0.01	1		0	2.474e-05	26.79	0.512115	2	1365.64	0.595338	25.7597	0
	High	IRLENEIQTYR	1	1	1	P13645		0	1.3312e+06	0.01	1		0	0.00545	21.87	1.66888	2	1434.77	-0.0391981	33.4995	1
	High	QSVEADINGLRR	1	1	1	P13645		0	1.78942e+06	0.01	1		0.002	0.01387	22.32	1.48352	3	1357.72	-0.603134	32.0188	1
	High	LAADDFR	1	1	1	P13645		0	4.73877e+06	0.01	1		0.008	0.04709	19.43	1.18928	2	807.4	-0.00937384	26.3027	0
Q71U36-2	Isoform 2 of Tubulin alpha-1A chain OS=Homo sapiens GN=TUBA1A - [TBA1A_HUMAN]	474.322	29.81	4	8	8	42	4.81543e+06	0.870167	20	32.0362	416	46.2678	5.08447
	A2	Sequence	# PSMs	# Proteins	# Protein Groups	Protein Group Accessions	Modifications	ΔCn	Area	Heavy/Light	Heavy/Light Count	Heavy/Light Variability [%]	q-Value	PEP	IonScore	Exp Value	Charge	MH+ [Da]	ΔM [ppm]	RT [min]	# Missed Cleavages
	High	DVNAAIATIK	3	4	1	Q71U36-2		0	3.35661e+06	0.826274	2	14.7171	0	1.217e-05	67.15	2.43543e-05	2	1015.58	0.0634163	33.9825	0
	High	AVcmLSNTTAIAEAWAR	5	4	1	Q71U36-2	C3(Carbamidomethyl); M4(Oxidation)	0	995530	0.880761	3	1.39396	0	6.233e-11	61.82	0.00030272	2	1880.9	0.925272	46.7408	0
	High	TIGGGDDSFNTFFSETGAGk	6	4	1	Q71U36-2	K20(Lys8)	0	1.2683e+06	1.07379	3	0.167066	0	1.738e-09	61.01	0.00036245	2	2015.92	3.8426	48.4919	0
	High	AVFVDLEPTVIDEVR	4	4	1	Q71U36-2		0	1.1642e+06	0.560735	3	8.94877	0	1.299e-05	43.02	0.0161664	2	1701.91	0.609111	52.327	0
	High	DVNAAIATIk	3	4	1	Q71U36-2	K10(Lys8)	0	3.06129e+06	0.859701	1		0	0.001502	42.35	0.00653993	2	1023.59	-0.034657	33.6226	0
	High	TIGGGDDSFNTFFSETGAGK	4	4	1	Q71U36-2		0	1.17982e+06				0	1.406e-06	38.37	0.0627157	2	2007.89	0.229587	48.5175	0
	High	AVFVDLEPTVIDEVr	1	4	1	Q71U36-2	R15(Arg10)	0	206534				0	0.0005376	36.89	0.0618538	2	1711.92	2.47807	52.3537	0
	High	DYEEVGVDSVEGEGEEEGEEY	3	4	1	Q71U36-2		0	1.63201e+06				0	9.373e-07	36.46	0.0609031	2	2348.91	2.65191	41.9583	0
	High	AVcmLSNTTAIAEAWAr	3	4	1	Q71U36-2	C3(Carbamidomethyl); M4(Oxidation); R17(Arg10)	0	797439				0	2.441e-07	33.95	0.184062	2	1890.91	0.743513	46.5925	0
	High	VGINYQPPTVVPGGDLAK	2	4	1	Q71U36-2		0	8.99227e+06	0.596315	1		0	0.003364	24.97	1.0121	2	1824.99	2.14587	42.3502	0
	High	VGINYQPPTVVPGGDLAk	2	4	1	Q71U36-2	K18(Lys8)	0	5.2831e+06	0.585347	2	4.51115	0	0.00224	24.08	1.10784	2	1833.01	3.11423	42.3707	0
	High	TIGGGDDsFNTFFSETGAGk	4	4	1	Q71U36-2	S8(Phospho); K20(Lys8)	0	308407	1.33565	3	0.213631	0	0.004761	23.18	1.62908	2	2095.88	1.82153	49.7117	0
	High	NLDIERPTYTNLNR	1	3	1	Q71U36-2		0	2.09741e+06	0.836512	1		0.004	0.02663	23.14	1.86278	2	1718.88	1.30529	34.8562	0
	High	YmAccLLYR	1	4	1	Q71U36-2	M2(Oxidation); C4(Carbamidomethyl); C5(Carbamidomethyl)	0	641149	1.07101	1		0.006	0.03461	10.46	13.0292	2	1265.55	0.0558814	35.8268	0
Q03252	Lamin-B2 OS=Homo sapiens GN=LMNB2 PE=1 SV=3 - [LMNB2_HUMAN]	431.61	13.5	2	6	7	27	6.17183e+06	0.977619	17	13.9794	600	67.6475	5.35107
	A2	Sequence	# PSMs	# Proteins	# Protein Groups	Protein Group Accessions	Modifications	ΔCn	Area	Heavy/Light	Heavy/Light Count	Heavy/Light Variability [%]	q-Value	PEP	IonScore	Exp Value	Charge	MH+ [Da]	ΔM [ppm]	RT [min]	# Missed Cleavages
	High	LESLSYQLSGLQk	5	2	1	Q03252	K13(Lys8)	0	819610	0.956556	2	3.22993	0	3.23e-10	77.41	4.40263e-06	2	1473.81	1.70564	41.6954	0
	High	NNSDKDQSLGNWR	4	2	1	Q03252		0	7.02434e+06	1.04744	2	1.81366	0	1.655e-06	72.28	1.66554e-05	2	1533.71	0.734492	25.8173	1
	High	NNSDkDQSLGNWr	7	2	1	Q03252	K5(Lys8); R13(Arg10)	0	8.29837e+06	1.01875	4	4.74173	0	1.634e-06	68.84	3.62201e-05	2	1551.73	1.11475	26.1199	1
	High	GLESDVAELr	2	2	1	Q03252	R10(Arg10)	0	326490	0.596246	2	51.4379	0	5.035e-05	54.31	0.000609584	2	1098.57	-0.319136	36.4819	0
	High	LESLSYQLSGLQK	3	2	1	Q03252		0	838374	0.809798	1		0	0.0004279	39.86	0.0269189	2	1465.79	1.24179	41.6896	0
	High	ALYESELADAR	1	2	1	Q03252		0	464125	0.753928	1		0	7.119e-05	28.37	0.295822	2	1237.61	0.133645	33.6848	0
	High	ALYESELADAr	1	2	1	Q03252	R11(Arg10)	0	382151	0.870662	1		0	6.197e-07	27.83	0.358228	2	1247.62	1.62569	33.3177	0
	High	GQSSWGTGESFr	2	2	1	Q03252	R12(Arg10)	0	797673	1.22458	2	4.85392	0.001	0.00684	28.83	0.233558	2	1308.59	0.704866	30.6555	0
	High	LLEGEEEr	1	3	2	P20700;Q03252	R8(Arg10)	0	9.37876e+06	0.799612	1		0.002	0.008722	29.81	0.132993	2	984.487	-0.0722399	21.0326	0
	High	ATSSSSGSLSATGR	1	2	1	Q03252		0	615807	0.987743	1		0.008	0.04749	15.08	6.51492	2	1268.61	0.740084	17.9018	0
P07437	Tubulin beta chain OS=Homo sapiens GN=TUBB PE=1 SV=2 - [TBB5_HUMAN]	415.163	23.65	1	8	8	38	3.96531e+06	0.895038	21	15.9082	444	49.639	4.89404
	A2	Sequence	# PSMs	# Proteins	# Protein Groups	Protein Group Accessions	Modifications	ΔCn	Area	Heavy/Light	Heavy/Light Count	Heavy/Light Variability [%]	q-Value	PEP	IonScore	Exp Value	Charge	MH+ [Da]	ΔM [ppm]	RT [min]	# Missed Cleavages
	High	ISVYYNEATGGk	3	1	1	P07437	K12(Lys8)	0	4.38165e+06	0.966979	1		0	0.0001044	54.64	0.000857177	2	1309.65	-0.11269	29.852	0
	High	ISVYYNEATGGK	3	1	1	P07437		0	4.64989e+06	0.967844	2	3.96525	0	2.707e-05	54.13	0.000906031	2	1301.64	1.04184	29.8991	0
	High	LAVNmVPFPR	5	1	1	P07437	M5(Oxidation)	0	1.85391e+06	0.876778	2	19.0152	0	0.00263	50.88	0.00168992	2	1159.63	-0.821645	39.2367	0
	High	LAVNmVPFPr	3	1	1	P07437	M5(Oxidation); R10(Arg10)	0	1.50068e+06	0.940695	2	37.5966	0	0.0004981	48.8	0.00239264	2	1169.64	0.778047	39.4074	0
	High	ImNTFSVVPSPk	3	1	1	P07437	M2(Oxidation); K12(Lys8)	0	2.0253e+06	0.682572	2	2.69199	0	7.387e-06	48.76	0.00318112	2	1343.71	0.724056	36.4159	0
	High	EIVHIQAGQcGNQIGAk	5	1	1	P07437	C10(Carbamidomethyl); K17(Lys8)	0	3.03799e+06	0.966695	4	5.33036	0	6.438e-09	31.85	0.281401	3	1830.94	0.790551	30.0176	0
	High	AILVDLEPGTmDSVr	2	1	1	P07437	M11(Oxidation); R15(Arg10)	0	2.35174e+06	0.694787	1		0	0.0003672	31.1	0.263303	2	1641.84	0.827407	42.3649	0
	High	EIVHIQAGQcGNQIGAK	5	1	1	P07437	C10(Carbamidomethyl)	0	3.86119e+06	0.922558	2	4.4921	0	0.0003676	28.41	0.635252	2	1822.93	1.92761	29.7213	0
	High	ImNTFSVVPSPK	3	1	1	P07437	M2(Oxidation)	0	3.09047e+06	0.643491	1		0	0.00557	27.68	0.394105	2	1335.7	-0.88755	35.9754	0
	High	AILVDLEPGTmDSVR	1	1	1	P07437	M11(Oxidation)	0	3.38483e+06				0	0.0003707	27.36	0.625158	2	1631.83	1.71067	42.3589	0
	High	ALTVPELTQQVFDAk	1	1	1	P07437	K15(Lys8)	0	148887	0.532617	1		0	0.004761	23.75	1.18623	2	1667.91	-1.10913	52.1233	0
	High	NSSYFVEWIPNNVK	1	1	1	P07437		0	205372	0.805044	1		0	0.005092	19.35	4.41699	2	1696.84	3.19724	50.159	0
	High	FPGQLNADLR	1	1	1	P07437		0	1.36912e+06				0.003	0.01919	23.63	0.864854	2	1130.6	0.362131	35.5834	0
	High	FPGQLNADLr	2	1	1	P07437	R10(Arg10)	0	1.50313e+06	0.874325	2	17.6602	0.005	0.03107	19.97	1.8598	2	1140.6	0.386817	35.9788	0
P08238	Heat shock protein HSP 90-beta OS=Homo sapiens GN=HSP90AB1 PE=1 SV=4 - [HS90B_HUMAN]	322.285	11.46	1	8	8	29	3.18541e+06	0.958285	19	14.8565	724	83.2121	5.03369
	A2	Sequence	# PSMs	# Proteins	# Protein Groups	Protein Group Accessions	Modifications	ΔCn	Area	Heavy/Light	Heavy/Light Count	Heavy/Light Variability [%]	q-Value	PEP	IonScore	Exp Value	Charge	MH+ [Da]	ΔM [ppm]	RT [min]	# Missed Cleavages
	High	SIYYITGESK	4	1	1	P08238		0	1.42891e+06	1.07464	3	4.60919	0	2.23e-05	45.7	0.00492551	2	1160.58	0.753771	32.2536	0
	High	NPDDITQEEYGEFYk	2	1	1	P08238	K15(Lys8)	0	926666	0.688107	1		0	1.342e-08	44.06	0.0132537	2	1855.81	0.359383	39.4491	0
	High	NPDDITQEEYGEFYK	3	1	1	P08238		0	1.10726e+06	0.943956	2	9.10384	0	1.927e-09	43.61	0.0140627	2	1847.8	2.49596	39.4855	0
	High	ADLINNLGTIAK	3	1	1	P08238		0	2.55023e+06	1.007	3	5.40797	0	0.0002127	40.4	0.0145466	2	1242.71	1.14374	41.8075	0
	High	EQVANSAFVEr	3	1	1	P08238	R11(Arg10)	0	1.21486e+06	1.03771	2	4.09378	0	0.0004919	39.52	0.0241857	2	1259.63	1.11807	27.5461	0
	High	EQVANSAFVER	2	1	1	P08238		0	1.20348e+06	0.95525	1		0	0.004378	39.12	0.0274375	2	1249.62	0.613164	27.5639	0
	High	SIYYITGESk	2	1	1	P08238	K10(Lys8)	0	1.28306e+06				0	0.003326	30.71	0.164996	2	1168.6	-0.120308	32.2482	0
	High	ADLINNLGTIAk	2	1	1	P08238	K12(Lys8)	0	2.71434e+06				0	2.128e-05	29.87	0.149251	2	1250.72	-1.72505	41.8827	0
	High	EDQTEYLEER	2	1	1	P08238		0	950924	0.90987	2	7.6976	0	0.001248	23.12	0.815635	2	1311.57	-0.0682255	27.3669	0
	High	IEDVGsDEEDDSGk	2	1	1	P08238	S6(Phospho); K14(Lys8)	0	1.8016e+06	0.794009	1		0	0.0009662	21.46	0.689846	2	1582.59	-0.23443	22.2463	0
	High	IEDVGsDEEDDSGKDK	2	1	1	P08238	S6(Phospho)	0	4.76484e+06	0.766516	2	2.18873	0.004	0.02472	42.81	0.007388	2	1817.7	1.04162	20.486	1
	High	IEDVGsDEEDDSGK	1	1	1	P08238	S6(Phospho)	0	2.07704e+06	0.867388	1		0.004	0.0257	25.72	0.21996	2	1574.58	1.41709	22.2918	0
	High	YIDQEELNk	1	1	1	P08238	K9(Lys8)	0	1.00153e+06	0.959563	1		0.004	0.02698	16.82	3.84016	2	1159.57	-0.684424	25.4112	0
P16403	Histone H1.2 OS=Homo sapiens GN=HIST1H1C PE=1 SV=2 - [H12_HUMAN]	288.429	15.96	3	5	5	28	1.27787e+07	0.903646	17	25.5629	213	21.3517	10.9312
	A2	Sequence	# PSMs	# Proteins	# Protein Groups	Protein Group Accessions	Modifications	ΔCn	Area	Heavy/Light	Heavy/Light Count	Heavy/Light Variability [%]	q-Value	PEP	IonScore	Exp Value	Charge	MH+ [Da]	ΔM [ppm]	RT [min]	# Missed Cleavages
	High	ALAAAGYDVEK	3	3	1	P16403		0	1.56964e+07	0.943998	2	2.3069	0	6.45e-06	59.81	0.000181781	2	1107.57	-0.0727153	27.8674	0
	High	SGVSLAALKK	2	3	1	P16403		0	2216554	1.03086	1		0	5.189e-06	57.31	0.000107474	2	973.604	0.189343	28.1601	1
	High	SGVSLAALK	3	3	1	P16403		0	5.98214e+06	0.924268	2	0.780445	0	1.526e-05	53.05	0.00038001	2	845.509	-0.0715523	32.9183	0
	High	ASGPPVSELITk	2	3	1	P16403	K12(Lys8)	0	1.08187e+07	0.705188	1		0	0.0004065	44.43	0.00664907	2	1206.68	0.315199	35.3026	0
	High	ALAAAGYDVEk	3	3	1	P16403	K11(Lys8)	0	1.45623e+07	0.903646	1		0	0.0001649	40.61	0.0158803	2	1115.58	0.549525	28.1437	0
	High	ASGPPVSELITK	3	3	1	P16403		0	1.46528e+07	0.712998	2	4.37243	0	0.0009036	36.12	0.0470971	2	1198.67	0.451551	35.6787	0
	High	KASGPPVSELITK	3	3	1	P16403		0	7.98695e+06	0.669998	2	2.0299	0	7.728e-05	35.28	0.0463255	2	1326.76	0.132467	32.0392	1
	High	kASGPPVSELITk	4	3	1	P16403	K1(Lys8); K13(Lys8)	0	5.42501e+06	0.691846	3	7.79955	0	0.0008756	25.71	0.32063	2	1342.79	-0.199693	32.0776	1
	High	SGVSLAALk	3	3	1	P16403	K9(Lys8)	0	5.78537e+06	0.967108	1		0.001	0.006637	42.29	0.0043911	2	853.523	0.0981386	33.2822	0
	High	SGVSLAALkk	2	3	1	P16403	K9(Lys8); K10(Lys8)	0	2.37342e+06	1.05942	2	1.58054	0.001	0.006483	34.57	0.0206691	2	989.632	-0.570645	28.4102	1
P21796	Voltage-dependent anion-selective channel protein 1 OS=Homo sapiens GN=VDAC1 PE=1 SV=2 - [VDAC1_HUMAN]	280.261	23.67	1	5	5	18	1.76006e+06	0.80682	12	11.4219	283	30.7536	8.54346
	A2	Sequence	# PSMs	# Proteins	# Protein Groups	Protein Group Accessions	Modifications	ΔCn	Area	Heavy/Light	Heavy/Light Count	Heavy/Light Variability [%]	q-Value	PEP	IonScore	Exp Value	Charge	MH+ [Da]	ΔM [ppm]	RT [min]	# Missed Cleavages
	High	LTFDSSFSPNTGk	3	1	1	P21796	K13(Lys8)	0	994446	0.85064	3	5.7135	0	0.0001512	54.05	0.0010675	2	1408.68	0.713816	37.378	0
	High	VTQSNFAVGYK	3	1	1	P21796		0	2.39947e+06	1.51155	3	0.575095	0	0.0003897	50.55	0.00188985	2	1213.62	0.352935	29.3815	0
	High	VTQSNFAVGYk	2	1	1	P21796	K11(Lys8)	0	3.22785e+06				0	0.002362	41.35	0.0142168	2	1221.64	0.618594	29.4289	0
	High	LTFDSSFSPNTGK	3	1	1	P21796		0	1.1249e+06				0	2.212e-05	35.56	0.0757472	2	1400.67	0.484178	37.7505	0
	High	YQIDPDAcFSAK	2	1	1	P21796	C8(Carbamidomethyl)	0	927433	0.698715	2	12.153	0	0.0005523	34.38	0.0739903	2	1414.63	0.510398	36.5654	0
	High	VNNSSLIGLGYTQTLKPGIK	2	1	1	P21796		0	621324	0.649208	2	0.149355	0	0.0001428	31.16	0.145349	3	2103.18	-0.623683	43.6525	0
	High	WTEYGLTFTEk	1	1	1	P21796	K11(Lys8)	0	262070	0.776848	1		0	0.004169	17.77	4.46766	2	1382.67	0.582004	43.4368	0
	High	YQIDPDAcFSAk	1	1	1	P21796	C8(Carbamidomethyl); K12(Lys8)	0	681184	0.806693	1		0.002	0.01635	24.27	0.837072	2	1422.65	0.0511934	36.2376	0
	High	WTEYGLTFTEK	1	1	1	P21796		0	337351				0.005	0.03055	12.61	13.3423	2	1374.66	1.76806	43.4663	0
A0A087WVQ9	Elongation factor 1-alpha 1 OS=Homo sapiens GN=EEF1A1 PE=4 SV=1 - [A0A087WVQ9_HUMAN]	272.235	9.07	4	4	4	16	5.27517e+06	0.738982	12	12.9135	441	47.8529	9.02686
	A2	Sequence	# PSMs	# Proteins	# Protein Groups	Protein Group Accessions	Modifications	ΔCn	Area	Heavy/Light	Heavy/Light Count	Heavy/Light Variability [%]	q-Value	PEP	IonScore	Exp Value	Charge	MH+ [Da]	ΔM [ppm]	RT [min]	# Missed Cleavages
	High	IGGIGTVPVGr	3	4	1	A0A087WVQ9	R11(Arg10)	0	5.73792e+06	0.804373	3	0.578369	0	9.887e-08	75.45	2.8111e-06	2	1035.62	0.154152	32.4488	0
	High	IGGIGTVPVGR	3	4	1	A0A087WVQ9		0	7.1777e+06				0	1.29e-06	69.59	1.18857e-05	2	1025.61	0.243691	32.6912	0
	High	YYVTIIDAPGHR	5	4	1	A0A087WVQ9		0	1.69405e+06	0.660908	5	3.21531	0	0.0002033	56.11	0.000669574	2	1404.73	1.50369	36.7687	0
	High	YYVTIIDAPGHr	1	4	1	A0A087WVQ9	R12(Arg10)	0	1.17407e+06				0.002	0.01487	23.3	1.27037	2	1414.74	0.566383	36.7517	0
	High	QTVAVGVIK	1	4	1	A0A087WVQ9		0	2.39614e+06	0.723495	1		0.003	0.01756	34.75	0.0278189	2	914.567	-0.0537632	28.3809	0
	High	LPLQDVYK	3	4	1	A0A087WVQ9		0	6.25167e+06	0.712011	3	0.849466	0.005	0.03236	34.81	0.0456736	2	975.551	-0.354217	34.2776	0
O60814	Histone H2B type 1-K OS=Homo sapiens GN=HIST1H2BK PE=1 SV=3 - [H2B1K_HUMAN]	271.777	28.57	11	4	4	21	1.0029e+07	0.903625	12	14.3226	126	13.8816	10.3159
	A2	Sequence	# PSMs	# Proteins	# Protein Groups	Protein Group Accessions	Modifications	ΔCn	Area	Heavy/Light	Heavy/Light Count	Heavy/Light Variability [%]	q-Value	PEP	IonScore	Exp Value	Charge	MH+ [Da]	ΔM [ppm]	RT [min]	# Missed Cleavages
	High	AmGImNSFVNDIFEr	5	11	1	O60814	M2(Oxidation); M5(Oxidation); R15(Arg10)	0	1.43785e+06	0.91403	2	16.1132	0	1.406e-07	65.73	9.80993e-05	2	1785.82	0.103175	50.9724	0
	High	AmGImNSFVNDIFER	7	11	1	O60814	M2(Oxidation); M5(Oxidation)	0	1.64301e+06	0.907959	1		0	5.208e-07	57.52	0.000629097	2	1775.81	0.0171191	51.4234	0
	High	QVHPDTGISSK	3	11	1	O60814		0	1.31023e+07	0.799188	3	3.13861	0	0.0001321	31.53	0.132318	3	1168.6	0.0920165	17.3642	0
	High	kESYSVYVYk	1	11	1	O60814	K1(Lys8); K10(Lys8)	0	5.6986e+06	1.00123	1		0.002	0.01044	31.44	0.166851	2	1281.67	0.829071	29.1529	1
	High	KESYSVYVYK	2	11	1	O60814		0	5.24869e+06	0.912511	2	2.16031	0.003	0.01921	30.71	0.214715	2	1265.64	0.129358	28.8669	1
	High	ESYSVYVYK	2	11	1	O60814		0	1.12862e+07	0.990619	2	0.559686	0.003	0.02005	26.94	0.343711	2	1137.55	0.250616	33.0163	0
	High	QVHPDTGISSk	1	11	1	O60814	K11(Lys8)	0	1.15211e+07	0.786372	1		0.004	0.02309	20.33	2.03485	2	1176.61	0.614478	17.0877	0
P08670	Vimentin OS=Homo sapiens GN=VIM PE=1 SV=4 - [VIME_HUMAN]	265.549	17.38	1	6	6	17	2.96512e+06	0.798126	10	8.38782	466	53.6191	5.12256
	A2	Sequence	# PSMs	# Proteins	# Protein Groups	Protein Group Accessions	Modifications	ΔCn	Area	Heavy/Light	Heavy/Light Count	Heavy/Light Variability [%]	q-Value	PEP	IonScore	Exp Value	Charge	MH+ [Da]	ΔM [ppm]	RT [min]	# Missed Cleavages
	High	FADLSEAANR	3	1	1	P08670		0	1.52947e+06	0.789998	2	2.84526	0	2.579e-05	65.77	4.6799e-05	2	1093.53	0.622207	28.8505	0
	High	FADLSEAANr	2	1	1	P08670	R10(Arg10)	0	1.18532e+06	0.814346	1		0	9.515e-05	58.97	0.000221332	2	1103.54	-0.350194	28.6137	0
	High	SLYASSPGGVYATr	3	1	1	P08670	R14(Arg10)	0	1.88849e+06	0.868889	2	2.71481	0	5.054e-07	56.72	0.000664086	2	1438.72	0.211447	31.6866	0
	High	SLYASSPGGVYATR	2	1	1	P08670		0	2.46523e+06	0.791013	1		0	2.096e-07	48	0.00452091	2	1428.71	0.788768	32.0088	0
	High	QVQSLTcEVDALK	2	1	1	P08670	C7(Carbamidomethyl)	0	1.02288e+06	0.659014	1		0	0.0033	29.09	0.383496	2	1490.75	1.8937	39.3363	0
	High	DGQVINETSQHHDDLE	2	1	1	P08670		0	4.90067e+06				0	0.003143	14.53	11.4855	3	1836.8	0.527508	26.657	0
	High	QVQSLTcEVDALk	1	1	1	P08670	C7(Carbamidomethyl); K13(Lys8)	0	282574	0.645665	1		0.002	0.01144	30.2	0.284397	2	1498.77	1.61332	39.6886	0
	High	EmEENFAVEAANYQDTIGR	1	1	1	P08670	M2(Oxidation)	0	235455	0.541483	1		0.002	0.01127	14.2	18.9524	2	2202.96	1.5873	42.6083	0
	High	EYQDLLNVK	1	1	1	P08670		0	892315	0.835957	1		0.008	0.05141	17.94	2.75269	2	1121.59	1.12095	36.7521	0
P35908	Keratin, type II cytoskeletal 2 epidermal OS=Homo sapiens GN=KRT2 PE=1 SV=2 - [K22E_HUMAN]	239.595	11.11	1	4	5	17	3.74936e+06	0.01	16	0	639	65.3932	8.00146
	A2	Sequence	# PSMs	# Proteins	# Protein Groups	Protein Group Accessions	Modifications	ΔCn	Area	Heavy/Light	Heavy/Light Count	Heavy/Light Variability [%]	q-Value	PEP	IonScore	Exp Value	Charge	MH+ [Da]	ΔM [ppm]	RT [min]	# Missed Cleavages
	High	FLEQQNQVLQTK	4	2	2	P04264;P35908		0	5.30234e+06	0.01	3	0	0	2.932e-06	64.19	0.000104107	2	1475.79	0.416707	32.0811	0
	High	GFSSGSAVVSGGSR	3	1	1	P35908		0	3.1137e+06	0.01	3	0	0	4.047e-07	44.38	0.00733155	2	1254.61	-0.31094	25.3008	0
	High	HGGGGGGFGGGGFGSR	5	1	1	P35908		0	2.83203e+06	0.01	5	0	0	0.0001416	42.08	0.0101031	3	1320.58	0.676674	25.1963	0
	High	AAFGGSGGRGSSSGGGYSSGSSSYGSGGR	3	1	1	P35908		0	1.78422e+06	0.01	3	0	0	2.388e-08	34.61	0.191841	3	2501.07	0.91678	23.8842	1
	High	GSSSGGGYSSGSSSYGSGGR	2	1	1	P35908		0	1.18323e+06	0.01	2	0	0	2.915e-05	22.01	1.17214	2	1740.71	0.551079	18.4279	0
E7EUT5	Glyceraldehyde-3-phosphate dehydrogenase OS=Homo sapiens GN=GAPDH PE=1 SV=1 - [E7EUT5_HUMAN]	238.477	25.77	3	4	4	17	2.62448e+06	0.82719	9	14.7505	260	27.8531	6.94678
	A2	Sequence	# PSMs	# Proteins	# Protein Groups	Protein Group Accessions	Modifications	ΔCn	Area	Heavy/Light	Heavy/Light Count	Heavy/Light Variability [%]	q-Value	PEP	IonScore	Exp Value	Charge	MH+ [Da]	ΔM [ppm]	RT [min]	# Missed Cleavages
	High	VPTANVSVVDLTcR	4	3	1	E7EUT5	C13(Carbamidomethyl)	0	2.97949e+06	0.848984	3	3.8571	0	2.994e-06	62.99	0.000163186	2	1530.8	1.40656	39.5822	0
	High	VPTANVSVVDLTcr	3	3	1	E7EUT5	C13(Carbamidomethyl); R14(Arg10)	0	2.39345e+06				0	3.78e-07	60.31	0.000292368	2	1540.8	1.18038	39.6178	0
	High	IISNAScTTNcLAPLAK	3	3	1	E7EUT5	C7(Carbamidomethyl); C11(Carbamidomethyl)	0	1.61827e+06	0.913232	3	1.03349	0	4.802e-07	37.88	0.0713143	2	1833.92	2.55015	35.834	0
	High	GALQNIIPASTGAAk	3	3	1	E7EUT5	K15(Lys8)	0	2.86767e+06	0.6868	2	10.4295	0	3.122e-06	31	0.142781	2	1419.81	0.761626	38.4122	0
	High	IISNAScTTNcLAPLAk	3	3	1	E7EUT5	C7(Carbamidomethyl); C11(Carbamidomethyl); K17(Lys8)	0	1.3629e+06				0	0.0002343	21.44	3.0334	2	1841.93	0.397235	36.1653	0
	High	VIISAPSADAPmFVmGVNHEK	1	3	1	E7EUT5	M12(Oxidation); M15(Oxidation)	0	2.02627e+06	0.699781	1		0	5.541e-05	14.59	20.9356	3	2245.1	0.270085	40.4027	0
P11021	78 kDa glucose-regulated protein OS=Homo sapiens GN=HSPA5 PE=1 SV=2 - [GRP78_HUMAN]	236.435	11.16	1	3	5	23	1.52832e+06	0.677586	12	20.5419	654	72.2884	5.16064
	A2	Sequence	# PSMs	# Proteins	# Protein Groups	Protein Group Accessions	Modifications	ΔCn	Area	Heavy/Light	Heavy/Light Count	Heavy/Light Variability [%]	q-Value	PEP	IonScore	Exp Value	Charge	MH+ [Da]	ΔM [ppm]	RT [min]	# Missed Cleavages
	High	IINEPTAAAIAYGLDK	4	2	2	P11021;P11142		0	1.44632e+06	0.741568	3	14.3146	0	8.401e-10	54.92	0.000924286	2	1659.9	2.36534	45.3365	0
	High	VEIIANDQGNR	2	2	2	P11021;P11142		0	2.01939e+06	0.974295	1		0	0.0001006	52.17	0.00136667	2	1228.63	0.197128	24.9154	0
	High	IINEPTAAAIAYGLDk	3	2	2	P11021;P11142	K16(Lys8)	0	1.07335e+06				0	3.866e-06	44.26	0.0105311	2	1667.91	-1.98738	45.2441	0
	High	SQIFSTASDNQPTVTIK	4	1	1	P11021		0	1.11923e+06	0.592602	3	1.51916	0	8.359e-07	41.71	0.0278816	2	1836.94	0.816051	37.4578	0
	High	ITPSYVAFTPEGER	3	1	1	P11021		0	354559	0.601287	2	3.08031	0	1.412e-05	27.85	0.556816	2	1566.78	1.11854	39.4398	0
	High	ITPSYVAFTPEGEr	1	1	1	P11021	R14(Arg10)	0	497934				0	0.0001598	23.52	1.42304	2	1576.79	1.1316	39.4142	0
	High	VEIIANDQGNr	2	2	2	P11021;P11142	R11(Arg10)	0	1.96748e+06	0.945387	1		0.001	0.007745	30.22	0.238935	2	1238.64	0.713954	24.6021	0
	High	NQLTSNPENTVFDAK	1	1	1	P11021		0	546670	0.807053	1		0.002	0.01334	21.54	2.70937	2	1677.81	3.92143	35.6977	0
	High	NQLTSNPENTVFDAk	1	1	1	P11021	K15(Lys8)	0	367894	0.658021	1		0.003	0.01937	14.76	12.412	2	1685.82	0.331669	36.0093	0
	High	SQIFSTASDNQPTVTIk	2	1	1	P11021	K17(Lys8)	0	656497				0.006	0.03589	19.28	4.7443	2	1844.95	3.23953	37.8852	0
Q8TEM1	Nuclear pore membrane glycoprotein 210 OS=Homo sapiens GN=NUP210 PE=1 SV=3 - [PO210_HUMAN]	235.924	2.7	1	4	4	14	759106	0.691017	8	36.3144	1887	204.983	6.81494
	A2	Sequence	# PSMs	# Proteins	# Protein Groups	Protein Group Accessions	Modifications	ΔCn	Area	Heavy/Light	Heavy/Light Count	Heavy/Light Variability [%]	q-Value	PEP	IonScore	Exp Value	Charge	MH+ [Da]	ΔM [ppm]	RT [min]	# Missed Cleavages
	High	AVDPTSGQLYGLAR	3	1	1	Q8TEM1		0	957138	0.765952	2	9.87119	0	2.266e-09	56.34	0.000670458	2	1447.76	1.80147	37.4371	0
	High	VGQALELPLr	3	1	1	Q8TEM1	R10(Arg10)	0	612124	0.0611328	2	10.2128	0	0.0001889	51.18	0.000717116	2	1105.66	0.705561	40.6856	0
	High	AVDPSSVALVTLGSSK	3	1	1	Q8TEM1		0	708055	0.732912	2	43.9664	0	1.844e-07	50.95	0.0020273	2	1530.84	1.2815	43.3157	0
	High	AVDPSSVALVTLGSSk	3	1	1	Q8TEM1	K16(Lys8)	0	255106				0	1.648e-06	32.86	0.121871	2	1538.85	1.56688	43.0721	0
	High	AVDPTSGQLYGLAr	1	1	1	Q8TEM1	R14(Arg10)	0	671225	0.88737	1		0	5.809e-05	29.57	0.293243	2	1457.76	1.55969	37.8056	0
	High	DLAVPAALTPr	1	1	1	Q8TEM1	R11(Arg10)	0	148839	0.666225	1		0.001	0.007139	18.11	2.11159	2	1133.66	3.23099	40.6799	0
P38646	Stress-70 protein, mitochondrial OS=Homo sapiens GN=HSPA9 PE=1 SV=2 - [GRP75_HUMAN]	235.505	12.08	1	6	6	21	1.43127e+06	0.772882	14	11.3259	679	73.6348	6.16357
	A2	Sequence	# PSMs	# Proteins	# Protein Groups	Protein Group Accessions	Modifications	ΔCn	Area	Heavy/Light	Heavy/Light Count	Heavy/Light Variability [%]	q-Value	PEP	IonScore	Exp Value	Charge	MH+ [Da]	ΔM [ppm]	RT [min]	# Missed Cleavages
	High	VINEPTAAALAYGLDK	3	1	1	P38646		0	1.36489e+06	0.730432	2	0.911328	0	3.481e-09	64.02	0.000116942	2	1645.88	1.214	44.5815	0
	High	VINEPTAAALAYGLDk	3	1	1	P38646	K16(Lys8)	0	990853	0.793908	1		0	6.391e-06	44.25	0.0105742	2	1653.89	0.594167	44.8798	0
	High	VQQTVQDLFGR	3	1	1	P38646		0	1.5548e+06	0.543642	3	11.9833	0	5.277e-05	42.03	0.0160977	2	1290.68	-0.212393	39.0976	0
	High	DAGQISGLNVLr	2	1	1	P38646	R12(Arg10)	0	878214	0.95378	2	5.86719	0	0.001584	35.56	0.0569702	2	1252.69	0.77302	40.6558	0
	High	QAVTNPNNTFYATK	2	1	1	P38646		0	1.37411e+06	0.811454	2	6.07834	0	0.003027	29.86	0.332033	2	1568.77	1.50524	29.1647	0
	High	TTPSVVAFTADGEr	1	1	1	P38646	R14(Arg10)	0	551007	0.787392	1		0	0.001812	29.41	0.344227	2	1460.73	0.0295992	36.6008	0
	High	TTPSVVAFTADGER	3	1	1	P38646		0	865511	0.772882	2	0.665373	0	0.001125	25.27	0.844399	2	1450.72	0.849343	36.1407	0
	High	DAGQISGLNVLR	2	1	1	P38646		0	641084				0.001	0.006493	24.23	0.773834	2	1242.68	0.655439	40.3749	0
	High	NAVITVPAYFNDSQR	2	1	1	P38646		0	885076	0.649701	1		0.006	0.03665	12.2	22.5719	2	1694.85	2.69896	44.0722	0
P22626-2	Isoform A2 of Heterogeneous nuclear ribonucleoproteins A2/B1 OS=Homo sapiens GN=HNRNPA2B1 - [ROA2_HUMAN]	229.283	17.6	2	4	4	17	3.81482e+06	0.725683	14	16.1498	341	35.9839	8.646
	A2	Sequence	# PSMs	# Proteins	# Protein Groups	Protein Group Accessions	Modifications	ΔCn	Area	Heavy/Light	Heavy/Light Count	Heavy/Light Variability [%]	q-Value	PEP	IonScore	Exp Value	Charge	MH+ [Da]	ΔM [ppm]	RT [min]	# Missed Cleavages
	High	NmGGPYGGGNYGPGGSGGSGGYGGR	5	2	1	P22626-2	M2(Oxidation)	0	2.64187e+06	0.705428	5	4.98554	0	2.439e-12	74.05	1.29812e-05	2	2205.9	1.13483	27.6822	0
	High	IDTIEIITDr	3	2	1	P22626-2	R10(Arg10)	0	1.01848e+06	0.921445	3	2.05639	0	7.753e-05	61.34	0.000152081	2	1198.66	0.468097	41.825	0
	High	GGNFGFGDSR	2	2	1	P22626-2		0	2.09692e+06	0.885997	2	2.20726	0	0.0005084	32.42	0.0550743	2	1013.44	0.239697	29.2275	0
	High	GGNFGFGDSr	2	2	1	P22626-2	R10(Arg10)	0	1.88573e+06	0.89242	1		0	0.00335	24.7	0.336303	2	1023.45	-0.387596	29.1707	0
	High	GGGGNFGPGPGSNFR	3	2	1	P22626-2		0	6.70568e+06	0.684004	3	1.91542	0	0.005582	21.62	1.46339	2	1377.63	1.09445	30.3625	0
	High	NmGGPYGGGNYGPGGSGGSGGYGGr	1	2	1	P22626-2	M2(Oxidation); R25(Arg10)	0	1.76448e+06				0	2.343e-07	17.4	6.14604	2	2215.91	1.58475	28.1237	0
	High	GGGGNFGPGPGSNFr	1	2	1	P22626-2	R15(Arg10)	0	4.52784e+06				0.002	0.0138	16.62	4.96191	2	1387.64	0.493668	30.4174	0
P09651-3	Isoform 2 of Heterogeneous nuclear ribonucleoprotein A1 OS=Homo sapiens GN=HNRNPA1 - [ROA1_HUMAN]	228.28	20.6	4	4	4	11	3.21864e+06	0.98228	7	7.61617	267	29.3682	9.14404
	A2	Sequence	# PSMs	# Proteins	# Protein Groups	Protein Group Accessions	Modifications	ΔCn	Area	Heavy/Light	Heavy/Light Count	Heavy/Light Variability [%]	q-Value	PEP	IonScore	Exp Value	Charge	MH+ [Da]	ΔM [ppm]	RT [min]	# Missed Cleavages
	High	NQGGYGGSSSSSSYGSGR	3	4	1	P09651-3		0	7.52217e+06	1.0081	3	3.84775	0	9.625e-07	59.78	0.000228644	2	1694.7	0.852294	18.4531	0
	High	NQGGYGGSSSSSSYGSGr	3	4	1	P09651-3	R18(Arg10)	0	7.38888e+06				0	4.264e-10	52.9	0.0011283	2	1704.71	1.08076	18.4157	0
	High	IEVIEImTDR	2	4	1	P09651-3	M7(Oxidation)	0	731336	0.967004	1		0	0.002061	28.08	0.34947	2	1234.64	0.67341	36.4528	0
	High	SEsPkEPEQLr	1	4	1	P09651-3	S3(Phospho); K5(Lys8); R11(Arg10)	0	1.02681e+06	0.741375	1		0.005	0.0299	30.53	0.195965	3	1397.64	0.229142	22.499	1
	High	IEVIEImTDr	1	4	1	P09651-3	M7(Oxidation); R10(Arg10)	0	831997	1.03398	1		0.006	0.03339	26.01	0.551845	2	1244.64	0.889682	36.78	0
	High	SSGPYGGGGQYFAKPR	1	4	1	P09651-3		0	1.10693e+06	0.768029	1		0.006	0.03991	17.17	6.77002	3	1628.78	1.16722	28.9853	0
Q8N9T8	Protein KRI1 homolog OS=Homo sapiens GN=KRI1 PE=1 SV=3 - [KRI1_HUMAN]	216.955	9.25	3	3	3	10	2.74659e+06	0.74371	7	3.43176	703	82.5475	5.13525
	A2	Sequence	# PSMs	# Proteins	# Protein Groups	Protein Group Accessions	Modifications	ΔCn	Area	Heavy/Light	Heavy/Light Count	Heavy/Light Variability [%]	q-Value	PEP	IonScore	Exp Value	Charge	MH+ [Da]	ΔM [ppm]	RT [min]	# Missed Cleavages
	High	AFVEDsEDEDGAGEGGSSLLQk	3	3	1	Q8N9T8	S6(Phospho); K22(Lys8)	0	3.17254e+06	0.747156	3	0.685491	0	3.468e-12	79.29	4.75753e-06	2	2327.97	1.69591	38.8917	0
	High	AFVEDsEDEDGAGEGGSSLLQK	4	3	1	Q8N9T8	S6(Phospho)	0	4.26583e+06	0.597649	1		0	4.616e-07	39.99	0.0374912	2	2319.95	0.455688	38.4351	0
	High	QLPALDGSLmGPEsPPAQEEEAPVsPHK	2	1	1	Q8N9T8	M10(Oxidation); S14(Phospho); S25(Phospho)	0	2.98438e+06	0.218231	2	17.5711	0	0.00298	15.7	23.9318	3	3087.34	-0.21591	41.8936	0
	High	YVDEENSDGEtSNHR	1	3	1	Q8N9T8	T11(Phospho)	0	989552	0.745236	1		0.008	0.0511	25.69	0.334385	2	1831.68	0.583986	16.996	0
P07910-4	Isoform 4 of Heterogeneous nuclear ribonucleoproteins C1/C2 OS=Homo sapiens GN=HNRNPC - [HNRPC_HUMAN]	216.753	30.8	6	6	6	24	1.43756e+06	0.833151	12	22.2419	250	27.8045	4.69092
	A2	Sequence	# PSMs	# Proteins	# Protein Groups	Protein Group Accessions	Modifications	ΔCn	Area	Heavy/Light	Heavy/Light Count	Heavy/Light Variability [%]	q-Value	PEP	IonScore	Exp Value	Charge	MH+ [Da]	ΔM [ppm]	RT [min]	# Missed Cleavages
	High	VFIGNLNTLVVk	3	6	1	P07910-4	K12(Lys8)	0	929765	0.85264	2	5.5788	0	5.761e-07	63.66	3.01799e-05	2	1324.81	1.19681	47.8235	0
	High	mIAGQVLDINLAAEPK	3	6	1	P07910-4	M1(Oxidation)	0	1.4583e+06	0.654939	3	17.4638	0	1.357e-08	43.25	0.0149681	2	1698.91	1.44128	45.5172	0
	High	mIAGQVLDINLAAEPk	4	6	1	P07910-4	M1(Oxidation); K16(Lys8)	0	848091				0	9.019e-09	39.36	0.0327586	2	1706.93	0.839637	45.5235	0
	High	GFAFVQYVNER	4	6	1	P07910-4		0	931458	0.845299	3	23.7785	0	0.0007865	36.62	0.0498804	2	1329.66	0.333857	45.188	0
	High	mESEGGADDsAEEGDLLDDDDNEDR	1	6	1	P07910-4	M1(Oxidation); S10(Phospho)	0	1.16599e+06	1.1439	1		0	0.0001079	31.07	0.114	2	2794.97	2.82921	34.4766	0
	High	mESEGGADDsAEEGDLLDDDDNEDRGDDQLELIK	2	6	1	P07910-4	M1(Oxidation); S10(Phospho)	0	1.52059e+06	0.883357	1		0	0.001312	24.03	2.87016	3	3806.5	4.25786	45.8635	1
	High	GFAFVQYVNEr	4	6	1	P07910-4	R11(Arg10)	0	737311				0.001	0.006112	30.19	0.233316	2	1339.67	0.537326	44.7499	0
	High	mESEGGADDsAEEGDLLDDDDNEDrGDDQLELIk	1	6	1	P07910-4	M1(Oxidation); S10(Phospho); R25(Arg10); K34(Lys8)	0	1.16137e+06	0.903708	1		0.005	0.02977	19.85	7.55395	3	3824.51	0.661166	45.9649	1
	High	mEsEGGADDSAEEGDLLDDDDNEDrGDDQLELIkDDEk	1	6	1	P07910-4	M1(Oxidation); S3(Phospho); R25(Arg10); K34(Lys8); K38(Lys8)	0	881697	0.579994	1		0.006	0.03819	21.29	6.00137	4	4319.72	2.15513	43.4344	2
	High	mESEGGADDsAEEGDLLDDDDNEDr	1	6	1	P07910-4	M1(Oxidation); S10(Phospho); R25(Arg10)	0	1.33377e+06				0.006	0.03908	19.9	1.54824	2	2804.98	2.74341	34.5213	0
P11388	DNA topoisomerase 2-alpha OS=Homo sapiens GN=TOP2A PE=1 SV=3 - [TOP2A_HUMAN]	211.936	2.55	4	3	3	15	2.60262e+06	0.967015	10	13.385	1531	174.276	8.71924
	A2	Sequence	# PSMs	# Proteins	# Protein Groups	Protein Group Accessions	Modifications	ΔCn	Area	Heavy/Light	Heavy/Light Count	Heavy/Light Variability [%]	q-Value	PEP	IonScore	Exp Value	Charge	MH+ [Da]	ΔM [ppm]	RT [min]	# Missed Cleavages
	High	NENTEGsPQEDGVELEGLk	4	4	1	P11388	S7(Phospho); K19(Lys8)	0	2.077e+06	0.93463	2	5.23333	0	2.155e-07	67.26	7.66197e-05	2	2132.92	2.28885	37.4488	0
	High	NENTEGsPQEDGVELEGLK	3	4	1	P11388	S7(Phospho)	0	2.19497e+06	1.04332	1		0	4.205e-09	52.12	0.00236084	2	2124.9	2.08597	37.8499	0
	High	IKNENTEGsPQEDGVELEGLK	3	4	1	P11388	S9(Phospho)	0	2.07667e+06	1.06424	3	14.4582	0	0.002376	52.11	0.003883	3	2366.08	0.77414	35.0454	1
	High	VPDEEENEEsDNEkETEk	2	4	1	P11388	S10(Phospho); K14(Lys8); K18(Lys8)	0	2.73559e+06	0.843117	1		0.002	0.01452	14.97	8.08149	2	2245.89	1.35367	19.4007	1
	High	VPDEEENEEsDNEKETEK	1	4	1	P11388	S10(Phospho)	0	3.23735e+06	0.776886	1		0.003	0.01969	33.69	0.0929735	2	2229.86	1.39824	19.3744	1
	High	IkNENTEGsPQEDGVELEGLk	2	4	1	P11388	K2(Lys8); S9(Phospho); K21(Lys8)	0	2.37554e+06	0.946768	2	15.6795	0.004	0.02473	15.54	19.175	3	2382.11	0.96692	35.408	1
E9PCY7	Heterogeneous nuclear ribonucleoprotein H OS=Homo sapiens GN=HNRNPH1 PE=1 SV=1 - [E9PCY7_HUMAN]	205.68	13.05	3	4	4	27	2.92264e+06	0.686616	14	5.35387	429	47.0574	6.34131
	A2	Sequence	# PSMs	# Proteins	# Protein Groups	Protein Group Accessions	Modifications	ΔCn	Area	Heavy/Light	Heavy/Light Count	Heavy/Light Variability [%]	q-Value	PEP	IonScore	Exp Value	Charge	MH+ [Da]	ΔM [ppm]	RT [min]	# Missed Cleavages
	High	VHIEIGPDGR	2	3	1	E9PCY7		0	1.5792e+06	0.705956	2	6.29016	0	0.0003273	48.59	0.00227804	2	1092.58	0.285886	28.5895	0
	High	HTGPNsPDTANDGFVR	4	3	1	E9PCY7	S6(Phospho)	0	6.36291e+06	0.669773	3	2.92126	0	5.269e-06	40.43	0.021887	3	1764.73	-0.0654884	26.1571	0
	High	STGEAFVQFASQEIAEk	5	3	1	E9PCY7	K17(Lys8)	0	341117	0.749442	1		0	4.138e-06	37.92	0.0776264	2	1849.91	0.824869	49.9234	0
	High	HTGPNsPDTANDGFVr	5	3	1	E9PCY7	S6(Phospho); R16(Arg10)	0	4.17857e+06	0.684879	2	3.1005	0	6.977e-05	37.09	0.0473243	2	1774.74	1.26722	26.1485	0
	High	STGEAFVQFASQEIAEK	3	3	1	E9PCY7		0	481328	0.493484	2	73.7423	0	2.324e-05	30.23	0.431104	2	1841.89	1.64484	49.9472	0
	High	HTGPNSPDTANDGFVR	1	3	1	E9PCY7		0	1.22114e+06	0.667901	1		0	0.005341	28.26	0.505236	3	1684.77	-0.417574	25.7173	0
	High	GLPWScSADEVQR	3	3	1	E9PCY7	C6(Carbamidomethyl)	0	825802	0.701768	3	23.963	0	0.0001218	25.03	0.823755	2	1504.69	1.54727	37.1984	0
	High	VHIEIGPDGr	2	3	1	E9PCY7	R10(Arg10)	0	1.16311e+06				0.002	0.01168	29.94	0.182048	2	1102.59	1.0871	28.3039	0
	High	HTGPNSPDTANDGFVr	1	3	1	E9PCY7	R16(Arg10)	0	782073				0.004	0.02485	19.59	3.83498	3	1694.78	0.0718227	25.7471	0
	High	GLPWScSADEVQr	1	3	1	E9PCY7	C6(Carbamidomethyl); R13(Arg10)	0	467724				0.004	0.02804	12.79	14.1998	2	1514.7	1.23567	36.812	0
P16401	Histone H1.5 OS=Homo sapiens GN=HIST1H1B PE=1 SV=3 - [H15_HUMAN]	180.636	23.45	1	5	5	17	1.0112e+07	0.746211	13	40.3379	226	22.5665	10.9165
	A2	Sequence	# PSMs	# Proteins	# Protein Groups	Protein Group Accessions	Modifications	ΔCn	Area	Heavy/Light	Heavy/Light Count	Heavy/Light Variability [%]	q-Value	PEP	IonScore	Exp Value	Charge	MH+ [Da]	ΔM [ppm]	RT [min]	# Missed Cleavages
	High	ALAAGGYDVEK	3	1	1	P16401		0	1.11727e+07	0.987764	3	3.52324	0	6.647e-10	59.39	0.000173023	2	1093.55	0.284096	27.1974	0
	High	ALAAGGYDVEk	3	1	1	P16401	K11(Lys8)	0	1.10855e+07				0	5.703e-05	43.54	0.00732484	2	1101.57	-0.0856788	26.831	0
	High	KATGPPVSELITK	2	1	1	P16401		0	5.11263e+06	0.746211	1		0	0.003312	42.43	0.00772068	3	1340.78	0.170691	32.8235	1
	High	ATGPPVSELITK	3	1	1	P16401		0	1.40508e+07	0.718229	3	1.14172	0	0.002652	41.19	0.0133209	2	1212.68	-0.178251	35.8711	0
	High	NGLSLAALk	2	1	1	P16401	K9(Lys8)	0	964759	1.00697	2	5.60963	0	0.0002975	40.88	0.00667148	2	894.55	0.0939652	37.8626	0
	High	SETAPAETATPAPVEKsPAK	2	1	1	P16401	S17(Phospho)	0	2.41197e+06	0.372032	2	9.77108	0	0.0007413	36.36	0.116759	2	2061.97	-0.327856	24.5655	1
	High	kATGPPVSELITk	1	1	1	P16401	K1(Lys8); K13(Lys8)	0	3.97366e+06	0.782707	1		0.003	0.0212	41.5	0.00808474	2	1356.81	0.953538	32.4606	1
	High	SETAPAETATPAPVEksPAk	1	1	1	P16401	K16(Lys8); S17(Phospho); K20(Lys8)	0	653511	0.308587	1		0.003	0.01972	10.91	42.9161	2	2078	0.224728	24.9499	1
P35527	Keratin, type I cytoskeletal 9 OS=Homo sapiens GN=KRT9 PE=1 SV=3 - [K1C9_HUMAN]	177.061	21.67	1	10	10	21	8.30912e+06	0.01	21	0	623	62.0268	5.23682
	A2	Sequence	# PSMs	# Proteins	# Protein Groups	Protein Group Accessions	Modifications	ΔCn	Area	Heavy/Light	Heavy/Light Count	Heavy/Light Variability [%]	q-Value	PEP	IonScore	Exp Value	Charge	MH+ [Da]	ΔM [ppm]	RT [min]	# Missed Cleavages
	High	QGVDADINGLR	2	1	1	P35527		0	1.7235e+06	0.01	2	0	0	0.0001517	44.59	0.0064607	2	1157.59	0.209765	31.6138	0
	High	GGSGGSHGGGSGFGGESGGSYGGGEEASGSGGGYGGGSGKSSHS	1	1	1	P35527		0	1.6136e+06	0.0145117	1		0	1.107e-08	43.87	0.0278836	4	3621.45	2.6057	24.8431	1
	High	GSRGGSGGSYGGGGSGGGYGGGSGSR	3	1	1	P35527		0	2.35168e+06	0.01	3	0	0	2.335e-05	40.18	0.0353875	3	2091.88	0.495106	16.8951	1
	High	SGGGGGGGLGSGGSIRSSYSR	2	1	1	P35527		0	1.1211e+06	0.0310446	2	397.388	0	0.0003316	37.87	0.0711112	3	1812.86	0.881593	25.0788	1
	High	SGGGGGGGLGSGGSIR	3	1	1	P35527		0	1.47875e+07	0.01	3	0	0	0.0002365	32.72	0.102797	2	1232.6	0.145027	20.8547	0
	High	GGSGGSYGGGGSGGGYGGGSGSR	3	1	1	P35527		0	7.58759e+06	0.01	3	0	0	3.963e-08	29.03	0.27887	2	1791.73	0.834024	18.3913	0
	High	GGSGGSHGGGSGFGGESGGSYGGGEEASGSGGGYGGGSGK	2	1	1	P35527		0	2.55227e+06	0.01	2	0	0	1.734e-09	28.11	0.920508	3	3223.29	1.69183	25.8748	0
	High	TLLDIDNTR	2	1	1	P35527		0	2.36768e+06	0.01	2	0	0.002	0.01514	29.37	0.202551	2	1060.56	0.0384616	34.7048	0
	High	TLNDmRQEYEQLIAK	1	1	1	P35527	M5(Oxidation)	0	1.46352e+06	0.01	1		0.002	0.009707	17.33	8.34482	3	1867.92	1.33586	37.6932	1
	High	STmQELNSR	1	1	1	P35527	M3(Oxidation)	0	2.15569e+06	0.01	1		0.003	0.02084	31.87	0.0882226	2	1081.5	0.69017	17.873	0
	High	STMQELNSR	1	1	1	P35527		0	1.00438e+06	0.01	1		0.007	0.04261	11.79	9.16508	2	1065.5	1.19817	22.1628	0
Q00839-2	Isoform Short of Heterogeneous nuclear ribonucleoprotein U OS=Homo sapiens GN=HNRNPU - [HNRPU_HUMAN]	167.308	6.45	2	4	4	16	1.94292e+06	0.922952	11	17.6449	806	88.9242	5.78271
	A2	Sequence	# PSMs	# Proteins	# Protein Groups	Protein Group Accessions	Modifications	ΔCn	Area	Heavy/Light	Heavy/Light Count	Heavy/Light Variability [%]	q-Value	PEP	IonScore	Exp Value	Charge	MH+ [Da]	ΔM [ppm]	RT [min]	# Missed Cleavages
	High	NFILDQTNVSAAAQR	6	2	1	Q00839-2		0	2.87491e+06	1.02	5	7.91925	0	1.415e-07	78.47	5.09905e-06	2	1647.85	0.911399	39.0632	0
	High	NFILDQTNVSAAAQr	3	2	1	Q00839-2	R15(Arg10)	0	2.55892e+06				0	2.149e-05	36.94	0.0725657	2	1657.85	-0.105774	39.0544	0
	High	YNILGTNTImDk	3	2	1	Q00839-2	M10(Oxidation); K12(Lys8)	0	878506	0.854618	3	13.8611	0	0.001805	25.9	0.709172	2	1406.71	0.76097	36.9046	0
	High	SSGPTSLFAVTVAPPGAR	3	2	1	Q00839-2		0	1.46241e+06	0.773067	2	8.78047	0	0.005545	24.13	1.34436	2	1714.91	0.384956	46.9467	0
	High	LNTLLQr	1	2	1	Q00839-2	R7(Arg10)	0	1.49145e+06	0.922952	1		0.008	0.04972	37.71	0.0148085	2	867.529	0.401096	28.883	0
E9PK09	Bcl-2-associated transcription factor 1 (Fragment) OS=Homo sapiens GN=BCLAF1 PE=1 SV=4 - [E9PK09_HUMAN]	158.758	4.28	7	2	2	9	7.78655e+06	0.700809	4	11.4084	725	83.0857	10.1401
	A2	Sequence	# PSMs	# Proteins	# Protein Groups	Protein Group Accessions	Modifications	ΔCn	Area	Heavy/Light	Heavy/Light Count	Heavy/Light Variability [%]	q-Value	PEP	IonScore	Exp Value	Charge	MH+ [Da]	ΔM [ppm]	RT [min]	# Missed Cleavages
	High	FNDsEGDDTEETEDYr	4	7	1	E9PK09	S4(Phospho); R16(Arg10)	0	1.65978e+06	0.716896	1		0	2.342e-10	79.4	9.66171e-07	2	2011.7	0.398281	29.0167	0
	High	FNDsEGDDTEETEDYR	3	7	1	E9PK09	S4(Phospho)	0	2.29883e+06	0.739697	2	11.4084	0	3.771e-09	57.5	0.000147597	2	2001.69	1.96997	28.5167	0
	High	ySPSQNsPIHHIPSR	1	7	1	E9PK09	Y1(Phospho); S7(Phospho)	0	1.32743e+07	0.485619	1		0	6.455e-05	23.92	1.14718	3	1879.79	0.524407	28.4484	0
	High	YsPSQNsPIHHIPSr	1	7	1	E9PK09	S2(Phospho); S7(Phospho); R15(Arg10)	0	6.42811e+06				0.003	0.02189	16.33	6.90279	3	1889.8	0.667635	28.4572	0
E7EWT1	Dolichyl-diphosphooligosaccharide--protein glycosyltransferase 48 kDa subunit OS=Homo sapiens GN=DDOST PE=1 SV=1 - [E7EWT1_HUMAN]	152.539	4.77	4	2	2	9	876687	0.729487	4	19.5764	419	46.5479	7.29834
	A2	Sequence	# PSMs	# Proteins	# Protein Groups	Protein Group Accessions	Modifications	ΔCn	Area	Heavy/Light	Heavy/Light Count	Heavy/Light Variability [%]	q-Value	PEP	IonScore	Exp Value	Charge	MH+ [Da]	ΔM [ppm]	RT [min]	# Missed Cleavages
	High	NTLLIAGLQAr	3	4	1	E7EWT1	R11(Arg10)	0	772129	0.743702	3	5.72748	0	4.897e-07	61.94	6.44853e-05	2	1179.71	0.216547	41.757	0
	High	NTLLIAGLQAR	5	4	1	E7EWT1		0	898390				0	0.0001611	44.68	0.00358109	2	1169.7	0.29559	41.7318	0
	High	SSLNPILFR	1	4	1	E7EWT1		0	854984	0.461297	1		0	0.00334	24.58	0.481576	2	1046.6	0.175429	42.2744	0
P52948-4	Isoform 4 of Nuclear pore complex protein Nup98-Nup96 OS=Homo sapiens GN=NUP98 - [NUP98_HUMAN]	147.249	5	6	3	3	12	1.83319e+06	0.699893	8	11.743	920	96.016	7.63525
	A2	Sequence	# PSMs	# Proteins	# Protein Groups	Protein Group Accessions	Modifications	ΔCn	Area	Heavy/Light	Heavy/Light Count	Heavy/Light Variability [%]	q-Value	PEP	IonScore	Exp Value	Charge	MH+ [Da]	ΔM [ppm]	RT [min]	# Missed Cleavages
	High	NLNNSNLFsPVNr	3	6	1	P52948-4	S9(Phospho); R13(Arg10)	0	2.19427e+06	0.759404	3	8.57332	0	1.433e-05	70.92	2.35973e-05	2	1578.73	-0.227679	40.1098	0
	High	YGLQDsDEEEEEHPSk	3	6	1	P52948-4	S6(Phospho); K16(Lys8)	0	1.79153e+06				0	0.003006	35.55	0.0525462	2	1979.77	1.13715	25.9142	0
	High	YGLQDsDEEEEEHPSK	4	6	1	P52948-4	S6(Phospho)	0	2.65712e+06	0.699893	4	10.5046	0	1.519e-05	33.86	0.0674491	2	1971.75	1.03766	25.5851	0
	High	NLNNSNLFsPVNR	1	6	1	P52948-4	S9(Phospho)	0	2.63703e+06				0	0.0001453	24.92	0.932016	2	1568.72	1.54036	40.0652	0
	High	DSENLAsPSEYPENGEr	1	6	1	P52948-4	S7(Phospho); R17(Arg10)	0	205411	0.330861	1		0	0.0004915	23.1	1.06919	2	1983.79	1.09151	30.8021	0
F8VV57	Keratin, type II cytoskeletal 5 (Fragment) OS=Homo sapiens GN=KRT5 PE=1 SV=1 - [F8VV57_HUMAN]	146.921	18.94	2	2	2	7	3.08317e+06	0.01	6	0	132	12.1498	12.0005
	A2	Sequence	# PSMs	# Proteins	# Protein Groups	Protein Group Accessions	Modifications	ΔCn	Area	Heavy/Light	Heavy/Light Count	Heavy/Light Variability [%]	q-Value	PEP	IonScore	Exp Value	Charge	MH+ [Da]	ΔM [ppm]	RT [min]	# Missed Cleavages
	High	ISISTSGGSFR	3	2	1	F8VV57		0	4.04226e+06	0.01	3	0	0	6.093e-06	68.89	2.26415e-05	2	1111.57	-0.324911	32.0539	0
	High	SFSTASAITPSVSR	4	2	1	F8VV57		0	2.12409e+06	0.01	3	0	0	1.996e-05	35.21	0.0860515	2	1410.72	0.394613	33.2824	0
H7C463	MICOS complex subunit MIC60 (Fragment) OS=Homo sapiens GN=IMMT PE=1 SV=1 - [H7C463_HUMAN]	143.737	10.93	7	5	5	20	1.23589e+06	0.98313	14	27.2555	613	68.1333	6.06201
	A2	Sequence	# PSMs	# Proteins	# Protein Groups	Protein Group Accessions	Modifications	ΔCn	Area	Heavy/Light	Heavy/Light Count	Heavy/Light Variability [%]	q-Value	PEP	IonScore	Exp Value	Charge	MH+ [Da]	ΔM [ppm]	RT [min]	# Missed Cleavages
	High	LSEQELQFR	1	7	1	H7C463		0	564819	0.677506	1		0	0.0002394	47.78	0.00310108	2	1149.59	0.407389	34.3909	0
	High	GIEQAVQSHAVAEEEAR	5	7	1	H7C463		0	1.94119e+06	1.05666	4	25.2123	0	4.628e-09	34.63	0.149654	2	1823.89	0.0175245	33.5563	0
	High	GIEQAVQSHAVAEEEAr	6	7	1	H7C463	R17(Arg10)	0	2.16454e+06	0.853586	2	12.7371	0	9.361e-05	29.87	0.451361	3	1833.9	0.326962	33.1473	0
	High	VVSQYHELVVQAr	1	7	1	H7C463	R13(Arg10)	0	344553	1.25952	1		0	0.001313	24.36	0.94431	2	1537.84	0.626485	30.7527	0
	High	VVSQYHELVVQAR	1	7	1	H7C463		0	422303	1.07194	1		0	6.617e-05	12.39	14.7537	2	1527.83	0.290196	31.0585	0
	High	TSSAETPTIPLGSAVEAIK	2	7	1	H7C463		0	978308	0.524124	2	15.1257	0.001	0.00755	12.14	21.9206	2	1872	-0.1956	45.979	0
	High	GVYSEETLR	2	7	1	H7C463		0	472950	1.11498	2	7.98404	0.002	0.01446	34.62	0.0575355	2	1053.52	-0.913224	26.5785	0
	High	LSEQELQFr	2	7	1	H7C463	R9(Arg10)	0	551718	1.02042	1		0.002	0.01123	21.5	1.4081	2	1159.6	1.3787	34.3829	0
B4DLW8	Probable ATP-dependent RNA helicase DDX5 OS=Homo sapiens GN=DDX5 PE=1 SV=1 - [B4DLW8_HUMAN]	143.225	4.67	8	2	2	7	1.1965e+06	0.598309	5	16.2402	535	60.5254	9.0708
	A2	Sequence	# PSMs	# Proteins	# Protein Groups	Protein Group Accessions	Modifications	ΔCn	Area	Heavy/Light	Heavy/Light Count	Heavy/Light Variability [%]	q-Value	PEP	IonScore	Exp Value	Charge	MH+ [Da]	ΔM [ppm]	RT [min]	# Missed Cleavages
	High	APILIATDVASr	3	8	1	B4DLW8	R12(Arg10)	0	1.78358e+06	0.644618	3	5.75279	0	2.772e-05	74.35	5.19888e-06	2	1236.72	0.0203995	37.765	0
	High	GDGPIcLVLAPTr	3	8	1	B4DLW8	C6(Carbamidomethyl); R13(Arg10)	0	340875	0.536615	1		0	5.383e-05	26.51	0.549012	2	1378.74	0.141361	45.7406	0
	High	GDGPIcLVLAPTR	1	8	1	B4DLW8	C6(Carbamidomethyl)	0	609424	0.47851	1		0.004	0.0268	18.04	4.03819	2	1368.73	1.81369	45.2711	0
B4DFL2	Isocitrate dehydrogenase [NADP] OS=Homo sapiens GN=IDH2 PE=1 SV=1 - [B4DFL2_HUMAN]	138.634	12.75	2	4	4	11	847526	1.13769	8	9.20483	400	45.1508	7.75244
	A2	Sequence	# PSMs	# Proteins	# Protein Groups	Protein Group Accessions	Modifications	ΔCn	Area	Heavy/Light	Heavy/Light Count	Heavy/Light Variability [%]	q-Value	PEP	IonScore	Exp Value	Charge	MH+ [Da]	ΔM [ppm]	RT [min]	# Missed Cleavages
	High	DQTDDQVTIDSALATQk	3	2	1	B4DFL2	K17(Lys8)	0	763814	1.16539	2	7.9094	0	3.239e-07	53.16	0.00224115	2	1856.9	0.454573	36.9117	0
	High	TIEAEAAHGTVTr	3	2	1	B4DFL2	R13(Arg10)	0	785872	1.08528	2	17.1296	0	0.0004347	50.7	0.00228445	2	1365.7	0.665462	22.7846	0
	High	DQTDDQVTIDSALATQK	2	2	1	B4DFL2		0	647813	1.07835	1		0	2.695e-06	35.14	0.13736	2	1848.88	0.807672	36.5878	0
	High	TIEAEAAHGTVTR	1	2	1	B4DFL2		0	652910	1.20365	1		0	0.001027	31.92	0.159772	2	1355.69	0.646932	23.096	0
	High	cATITPDEAr	1	2	1	B4DFL2	C1(Carbamidomethyl); R10(Arg10)	0	992890	0.947132	1		0.003	0.01716	41.38	0.0115717	2	1143.53	0.949169	22.2384	0
	High	LIDDmVAQVLK	1	2	1	B4DFL2	M5(Oxidation)	0	302835	1.1714	1		0.005	0.03216	18.01	3.5673	2	1260.69	3.05002	40.8941	0
Q9H6F5	Coiled-coil domain-containing protein 86 OS=Homo sapiens GN=CCDC86 PE=1 SV=1 - [CCD86_HUMAN]	137.43	17.78	1	3	3	14	9.88282e+06	0.304628	8	5.29221	360	40.2113	10.3306
	A2	Sequence	# PSMs	# Proteins	# Protein Groups	Protein Group Accessions	Modifications	ΔCn	Area	Heavy/Light	Heavy/Light Count	Heavy/Light Variability [%]	q-Value	PEP	IonScore	Exp Value	Charge	MH+ [Da]	ΔM [ppm]	RT [min]	# Missed Cleavages
	High	LQQGAGLESPQGQPEPGAAsPQR	7	1	1	Q9H6F5	S20(Phospho)	0	2.4443e+07	0.30821	5	3.5003	0	1.136e-11	67.24	0.000130961	2	2383.11	2.41468	29.5275	0
	High	LQQGAGLESPQGQPEPGAAsPQr	5	1	1	Q9H6F5	S20(Phospho); R23(Arg10)	0	6.7404e+06	0.309321	1		0	2.771e-06	39.39	0.0833928	2	2393.12	3.13198	29.2499	0
	High	AGLGSPERPPKtSPGsPR	1	1	1	Q9H6F5	T12(Phospho); S16(Phospho)	0	2.15449e+06	0.193294	1		0	0.004043	19.2	5.17214	3	1950.89	1.08718	25.1102	1
	High	ALVEFESNPEETREPGsPPSVQR	1	1	1	Q9H6F5	S17(Phospho)	0	3.05101e+06	0.01	1		0	0.004496	16.92	15.6837	3	2635.21	0.978916	38.5538	1
P52272-2	Isoform 2 of Heterogeneous nuclear ribonucleoprotein M OS=Homo sapiens GN=HNRNPM - [HNRPM_HUMAN]	130.757	5.79	3	3	3	11	1.29017e+06	0.670463	8	9.35599	691	73.5724	8.82178
	A2	Sequence	# PSMs	# Proteins	# Protein Groups	Protein Group Accessions	Modifications	ΔCn	Area	Heavy/Light	Heavy/Light Count	Heavy/Light Variability [%]	q-Value	PEP	IonScore	Exp Value	Charge	MH+ [Da]	ΔM [ppm]	RT [min]	# Missed Cleavages
	High	QGGGGGGGSVPGIEr	3	3	1	P52272-2	R15(Arg10)	0	1.37656e+06	0.635309	2	1.02232	0	4.445e-05	40.69	0.0197663	2	1294.64	0.689739	23.9934	0
	High	mGPAmGPALGAGIER	2	3	1	P52272-2	M1(Oxidation); M5(Oxidation)	0	529719	0.603079	2	30.1027	0	0.0002085	36.62	0.0586022	2	1459.7	-0.0113934	30.8993	0
	High	QGGGGGGGSVPGIER	2	3	1	P52272-2		0	2.18175e+06	0.736339	1		0	0.002981	19	2.81433	2	1284.63	0.195255	24.0111	0
	High	INEILSNALk	2	3	1	P52272-2	K10(Lys8)	0	784608	0.670463	2	0.864784	0.001	0.006489	41.28	0.00876922	2	1122.66	0.249506	38.704	0
	High	INEILSNALK	2	3	1	P52272-2		0	1.15905e+06	0.715622	1		0.004	0.02283	38.41	0.0190864	2	1114.65	-0.261425	38.6924	0
P05141	ADP/ATP translocase 2 OS=Homo sapiens GN=SLC25A5 PE=1 SV=7 - [ADT2_HUMAN]	124.25	7.72	1	2	2	4	1.00867e+06	1.05159	4	11.0941	298	32.8312	9.68604
	A2	Sequence	# PSMs	# Proteins	# Protein Groups	Protein Group Accessions	Modifications	ΔCn	Area	Heavy/Light	Heavy/Light Count	Heavy/Light Variability [%]	q-Value	PEP	IonScore	Exp Value	Charge	MH+ [Da]	ΔM [ppm]	RT [min]	# Missed Cleavages
	High	DFLAGGVAAAISk	3	1	1	P05141	K13(Lys8)	0	940824	1.06096	3	22.3938	0	5.031e-10	60.26	0.000160922	2	1227.69	2.31164	45.0842	0
	High	LLLQVQHASK	1	1	1	P05141		0	1.07652e+06	1.0423	1		0.008	0.05324	26.66	0.218903	2	1136.68	0.300328	27.5069	0
A2T926	Thymopentin OS=Homo sapiens GN=TMPO PE=1 SV=1 - [A2T926_HUMAN]	123.137	28.63	5	4	4	28	2.98216e+06	0.758994	16	23.854	248	27.3714	8.48486
	A2	Sequence	# PSMs	# Proteins	# Protein Groups	Protein Group Accessions	Modifications	ΔCn	Area	Heavy/Light	Heavy/Light Count	Heavy/Light Variability [%]	q-Value	PEP	IonScore	Exp Value	Charge	MH+ [Da]	ΔM [ppm]	RT [min]	# Missed Cleavages
	High	YGVNPGPIVGTTR	4	5	1	A2T926		0	1.74794e+06	0.830511	2	1.70108	0	0.003654	40.96	0.0197654	2	1330.71	0.673754	33.5947	0
	High	SELVANNVTLPAGEQR	4	5	1	A2T926		0	772090	0.821238	2	5.9223	0	0.0006962	27.18	0.70636	2	1697.89	3.08571	35.0187	0
	High	SSTPLPTISSSAENTR	3	5	1	A2T926		0	1.48546e+06	0.685891	3	1.78475	0	0.0006659	26.08	0.896652	2	1647.82	1.06609	32.4543	0
	High	SELVANNVTLPAGEQr	4	5	1	A2T926	R16(Arg10)	0	596596	0.910781	1		0	0.00107	24.97	1.16573	2	1707.89	1.65676	35.3649	0
	High	GPPDFssDEEREPTPVLGSGAAAAGR	4	5	1	A2T926	S6(Phospho); S7(Phospho)	0	5.71308e+06	0.2349	4	62.2485	0	0.0005333	20.81	5.05919	3	2730.16	5.12027	40.6966	1
	High	GPPDFSsDEEREPTPVLGSGAAAAGR	2	5	1	A2T926	S7(Phospho)	0	2.91436e+06	0.414677	1		0	0.0007719	13.91	29.9163	3	2650.18	1.59836	38.6979	1
	High	YGVNPGPIVGTTr	2	5	1	A2T926	R13(Arg10)	0	1.27538e+06	0.868729	1		0.002	0.008807	28.23	0.359476	2	1340.72	0.237187	33.2512	0
	High	SSTPLPTISSSAENTr	2	5	1	A2T926	R16(Arg10)	0	1.01264e+06				0.004	0.0229	25.96	0.916449	2	1657.83	1.29972	32.4604	0
	High	SstPLPTISSSAENTr	2	5	1	A2T926	S2(Phospho); T3(Phospho); R16(Arg10)	0	1.16712e+06	1.51192	1		0.006	0.03568	15.18	7.60445	2	1817.76	1.49649	33.6864	0
	High	SstPLPTISSSAENTR	1	5	1	A2T926	S2(Phospho); T3(Phospho)	0	985871	1.0052	1		0.008	0.04776	13.31	11.1788	2	1807.75	1.01451	34.1134	0
Q5JTV8-2	Isoform 2 of Torsin-1A-interacting protein 1 OS=Homo sapiens GN=TOR1AIP1 - [TOIP1_HUMAN]	119.797	17.41	6	3	3	14	1.90056e+06	0.896997	12	31.7001	379	43.0636	7.1958
	A2	Sequence	# PSMs	# Proteins	# Protein Groups	Protein Group Accessions	Modifications	ΔCn	Area	Heavy/Light	Heavy/Light Count	Heavy/Light Variability [%]	q-Value	PEP	IonScore	Exp Value	Charge	MH+ [Da]	ΔM [ppm]	RT [min]	# Missed Cleavages
	High	DSHssEEDEASSQTDLSQTISK	4	6	1	Q5JTV8-2	S4(Phospho); S5(Phospho)	0	1.60675e+06	0.844747	4	8.91545	0	2.026e-07	42.89	0.0128305	2	2540.96	3.21101	32.3009	0
	High	DsHsSEEDEASSQTDLSQTISk	3	6	1	Q5JTV8-2	S2(Phospho); S4(Phospho); K22(Lys8)	0	1.65295e+06	0.980716	1		0	4.445e-08	38.82	0.0376536	2	2548.98	3.37724	32.2704	0
	High	DSHsSEEDEASSQTDLSQTISk	4	6	1	Q5JTV8-2	S4(Phospho); K22(Lys8)	0	1.40697e+06	1.17085	4	25.4339	0	1.629e-06	33.99	0.160328	3	2469	0.523791	30.8605	0
	High	LQQQHSEQPPLQPSPVmtR	1	6	1	Q5JTV8-2	M17(Oxidation); T18(Phospho)	0	2.8582e+06	0.472185	1		0	0.0007543	17.13	12.2392	3	2297.08	0.584446	27.6812	0
	High	VNFSEEGEtEEDDQDSSHSSVTTVK	1	5	1	Q5JTV8-2	T9(Phospho)	0	1.19054e+06	0.590325	1		0.004	0.02489	11.75	29.8382	3	2836.13	0.321299	30.577	0
	High	DSHSsEEDEASSQTDLSQTISK	1	6	1	Q5JTV8-2	S5(Phospho)	0	626671	1.01249	1		0.007	0.04318	17.76	6.39409	3	2460.99	1.65733	30.4891	0
Q8WWQ0	PH-interacting protein OS=Homo sapiens GN=PHIP PE=1 SV=2 - [PHIP_HUMAN]	118.97	1.87	1	2	2	7	1.03242e+06	0.854823	4	4.63084	1821	206.56	8.85107
	A2	Sequence	# PSMs	# Proteins	# Protein Groups	Protein Group Accessions	Modifications	ΔCn	Area	Heavy/Light	Heavy/Light Count	Heavy/Light Variability [%]	q-Value	PEP	IonScore	Exp Value	Charge	MH+ [Da]	ΔM [ppm]	RT [min]	# Missed Cleavages
	High	TAFYNEDDsEEEQr	3	1	1	Q8WWQ0	S9(Phospho); R14(Arg10)	0	1234007	0.8385	1		0	1.301e-05	55.5	0.000277188	2	1822.67	-0.159745	29.0352	0
	High	TAFYNEDDsEEEQR	3	1	1	Q8WWQ0	S9(Phospho)	0	1.35524e+06	0.881929	2	1.77014	0	0.0001017	53.43	0.000440777	2	1812.66	0.629958	28.6198	0
	High	VLsDsEDEEKDADVPGTSTR	1	1	1	Q8WWQ0	S3(Phospho); S5(Phospho)	0	709596	0.729756	1		0	0.005511	18.74	3.48785	2	2309.91	0.272063	31.4137	1
H0Y6E7	RNA-binding motif protein, X chromosome, N-terminally processed (Fragment) OS=Homo sapiens GN=RBMX PE=1 SV=2 - [H0Y6E7_HUMAN]	115.157	13.7	3	3	3	13	841636	0.919925	7	34.4919	292	31.8364	9.84717
	A2	Sequence	# PSMs	# Proteins	# Protein Groups	Protein Group Accessions	Modifications	ΔCn	Area	Heavy/Light	Heavy/Light Count	Heavy/Light Variability [%]	q-Value	PEP	IonScore	Exp Value	Charge	MH+ [Da]	ΔM [ppm]	RT [min]	# Missed Cleavages
	High	LFIGGLNTETNEK	4	3	1	H0Y6E7		0	1.04922e+06	1.06219	3	12.2543	0	0.0001105	37.39	0.0498197	2	1435.75	1.56115	38.9717	0
	High	GFAFVTFESPADAK	4	3	1	H0Y6E7		0	827467	0.683591	2	7.69435	0	0.0001745	36.76	0.0599694	2	1486.72	1.97714	48.7024	0
	High	GFAFVTFESPADAk	3	3	1	H0Y6E7	K14(Lys8)	0	595734	0.93679	1		0	1.555e-06	35.7	0.0844738	2	1494.74	0.143886	48.7082	0
	High	VEQATKPSFESGR	2	3	1	H0Y6E7		0	648223	0.702759	1		0.001	0.006893	32.65	0.151051	2	1435.72	0.543343	22.0077	0
P04843	Dolichyl-diphosphooligosaccharide--protein glycosyltransferase subunit 1 OS=Homo sapiens GN=RPN1 PE=1 SV=1 - [RPN1_HUMAN]	114.072	5.77	1	3	3	9	561185	0.798393	4	6.71562	607	68.5268	6.37939
	A2	Sequence	# PSMs	# Proteins	# Protein Groups	Protein Group Accessions	Modifications	ΔCn	Area	Heavy/Light	Heavy/Light Count	Heavy/Light Variability [%]	q-Value	PEP	IonScore	Exp Value	Charge	MH+ [Da]	ΔM [ppm]	RT [min]	# Missed Cleavages
	High	ALTSEIALLQSr	3	1	1	P04843	R12(Arg10)	0	486337	0.835346	2	5.79914	0	0.0002004	50.41	0.00157051	2	1311.75	-1.03307	44.6027	0
	High	ALTSEIALLQSR	4	1	1	P04843		0	612911	0.793487	1		0	6.547e-08	48.1	0.00273134	2	1301.74	-0.315225	44.2681	0
	High	TILPAAAQDVYYR	1	1	1	P04843		0	138047				0	0.002707	13.58	11.7943	2	1480.78	1.955	40.9107	0
	High	LPVALDPGAK	1	1	1	P04843		0	932598	0.579886	1		0.007	0.04411	20.73	1.04434	2	980.577	-0.631673	32.8685	0
O00567	Nucleolar protein 56 OS=Homo sapiens GN=NOP56 PE=1 SV=4 - [NOP56_HUMAN]	112.43	10.94	1	5	5	15	4.37046e+06	0.527998	11	33.4283	594	66.0087	9.18799
	A2	Sequence	# PSMs	# Proteins	# Protein Groups	Protein Group Accessions	Modifications	ΔCn	Area	Heavy/Light	Heavy/Light Count	Heavy/Light Variability [%]	q-Value	PEP	IonScore	Exp Value	Charge	MH+ [Da]	ΔM [ppm]	RT [min]	# Missed Cleavages
	High	EELmSsDLEETAGSTSIPk	3	1	1	O00567	M4(Oxidation); S6(Phospho); K19(Lys8)	0	1.15237e+06	0.546699	2	5.82304	0	1.364e-07	39.03	0.0501666	2	2127.91	0.677696	38.8227	0
	High	YPASTVQILGAEK	2	1	1	O00567		0	1.04428e+06	0.529145	2	0.321861	0	0.0007817	31.61	0.180222	2	1376.74	-0.228425	36.9363	0
	High	YPASTVQILGAEk	2	1	1	O00567	K13(Lys8)	0	551377				0	5.355e-05	21.22	1.83374	2	1384.76	0.273763	37.0334	0
	High	EEPVssGPEEAVGK	3	1	1	O00567	S5(Phospho); S6(Phospho)	0	5.90311e+06	0.417682	3	2.20109	0	0.004969	16.31	2.5201	2	1574.6	0.368075	29.1064	0
	High	EELmSsDLEETAGSTSIPK	2	1	1	O00567	M4(Oxidation); S6(Phospho)	0	2.28385e+06	0.465271	1		0.001	0.006473	19.52	4.18489	2	2119.9	2.42607	38.2269	0
	High	VVSLSEYR	1	1	1	O00567		0	4.92442e+06	0.716698	1		0.002	0.00924	47.3	0.00223357	2	952.51	0.15226	29.4484	0
	High	LSFYETGEIPR	2	1	1	O00567		0	441597	0.72953	2	2.04261	0.002	0.009008	32.49	0.12772	2	1311.66	0.663111	40.6381	0
Q07020-2	Isoform 2 of 60S ribosomal protein L18 OS=Homo sapiens GN=RPL18 - [RL18_HUMAN]	107.257	23.27	5	3	3	11	572543	0.708193	7	15.1276	159	18.08	11.8394
	A2	Sequence	# PSMs	# Proteins	# Protein Groups	Protein Group Accessions	Modifications	ΔCn	Area	Heavy/Light	Heavy/Light Count	Heavy/Light Variability [%]	q-Value	PEP	IonScore	Exp Value	Charge	MH+ [Da]	ΔM [ppm]	RT [min]	# Missed Cleavages
	High	ILTFDQLALDSPK	4	5	1	Q07020-2		0	679951	0.573738	3	16.2793	0	1.676e-06	44.28	0.0092902	2	1460.8	-0.155596	49.5212	0
	High	TAVVVGTITDDVR	2	5	1	Q07020-2		0	515670	0.767072	2	1.37849	0	4.719e-07	35.27	0.0691358	2	1345.73	1.80232	37.0544	0
	High	TAVVVGTITDDVr	1	5	1	Q07020-2	R13(Arg10)	0	372608	0.708193	1		0	0.0002416	31.68	0.149051	2	1355.74	0.91206	37.3937	0
	High	TNSTFNQVVLK	1	5	1	Q07020-2		0	309203	1.19705	1		0.001	0.007767	43.56	0.00978252	2	1250.68	0.899616	33.7407	0
	High	ILTFDQLALDSPk	2	5	1	Q07020-2	K13(Lys8)	0	344883				0.003	0.01884	25.3	0.610163	2	1468.82	2.97691	49.463	0
	High	TNSTFNQVVLk	1	5	1	Q07020-2	K11(Lys8)	0	522007				0.005	0.03217	10.92	17.7192	2	1258.69	0.0871706	33.8283	0
Q9HB58-2	Isoform 2 of Sp110 nuclear body protein OS=Homo sapiens GN=SP110 - [SP110_HUMAN]	105.12	5.64	7	2	2	6	3.6788e+06	0.270846	6	21.2082	408	46.2551	9.45166
	A2	Sequence	# PSMs	# Proteins	# Protein Groups	Protein Group Accessions	Modifications	ΔCn	Area	Heavy/Light	Heavy/Light Count	Heavy/Light Variability [%]	q-Value	PEP	IonScore	Exp Value	Charge	MH+ [Da]	ΔM [ppm]	RT [min]	# Missed Cleavages
	High	DNsPEPNDPEEPQEVSSTPSDK	5	7	1	Q9HB58-2	S3(Phospho)	0	2.78034e+06	0.255209	5	17.7717	0	1.382e-08	52.52	0.00196867	2	2477.99	1.50024	27.768	0
	High	DNsPEPNDPEEPQEVSSTPSDKK	1	7	1	Q9HB58-2	S3(Phospho)	0	4.57726e+06	0.319967	1		0	0.001253	22.66	2.86935	3	2606.08	1.60897	25.2395	1
P08575-2	Isoform 2 of Receptor-type tyrosine-protein phosphatase C OS=Homo sapiens GN=PTPRC - [PTPRC_HUMAN]	100.46	3.85	4	2	2	5	1.52946e+07	0.875297	2	1.67023	1143	130.815	6.32861
	A2	Sequence	# PSMs	# Proteins	# Protein Groups	Protein Group Accessions	Modifications	ΔCn	Area	Heavy/Light	Heavy/Light Count	Heavy/Light Variability [%]	q-Value	PEP	IonScore	Exp Value	Charge	MH+ [Da]	ΔM [ppm]	RT [min]	# Missed Cleavages
	High	NRNsNVIPYDYNR	2	4	1	P08575-2	S4(Phospho)	0	2.77756e+07	0.875297	2	1.67023	0	8.875e-05	57.41	0.00053122	2	1704.75	1.53818	31.2586	1
	High	EQAEGSEPTSGTEGPEHSVNGPAsPALNQGS	1	4	1	P08575-2	S24(Phospho)	0	2.81351e+06				0	2.59e-07	22.72	3.8665	3	3101.3	1.0485	30.1977	0
	High	NrNsNVIPYDYNr	2	4	1	P08575-2	R2(Arg10); S4(Phospho); R13(Arg10)	0	2.39646e+07				0.001	0.007154	28.68	0.431221	2	1724.77	0.990982	31.6747	1
B4E2T8	Calnexin OS=Homo sapiens GN=CANX PE=1 SV=1 - [B4E2T8_HUMAN]	86.4212	10.33	3	4	4	13	3.68159e+06	0.767375	10	19.1612	484	55.5631	4.70361
	A2	Sequence	# PSMs	# Proteins	# Protein Groups	Protein Group Accessions	Modifications	ΔCn	Area	Heavy/Light	Heavy/Light Count	Heavy/Light Variability [%]	q-Value	PEP	IonScore	Exp Value	Charge	MH+ [Da]	ΔM [ppm]	RT [min]	# Missed Cleavages
	High	QKsDAEEDGGTVSQEEEDR	5	3	1	B4E2T8	S3(Phospho)	0	4.08717e+06	0.766857	5	13.4842	0	5.105e-05	43.75	0.00993517	2	2188.86	1.61535	21.1847	1
	High	SDAEEDGGTVsQEEEDR	2	3	1	B4E2T8	S11(Phospho)	0	689569	1.08861	2	11.5319	0	0.004018	26.5	0.266296	2	1932.7	2.76937	23.1999	0
	High	AEEDEILNrsPr	1	3	1	B4E2T8	R9(Arg10); S10(Phospho); R12(Arg10)	0	3.89454e+06	0.629606	1		0	0.0003309	24.24	1.02369	3	1528.69	0.0514922	27.7385	1
	High	SDAEEDGGTVsQEEEDr	1	3	1	B4E2T8	S11(Phospho); R17(Arg10)	0	411512	0.767894	1		0	0.0005723	24.14	0.436169	2	1942.71	1.89177	22.7324	0
	High	QksDAEEDGGTVSQEEEDr	2	3	1	B4E2T8	K2(Lys8); S3(Phospho); R19(Arg10)	0	3.16327e+06				0	0.0004657	22.74	1.3622	3	2206.87	-0.287797	21.0445	1
	High	AEEDEILNRsPR	1	3	1	B4E2T8	S10(Phospho)	0	6.21456e+06				0.001	0.006752	16.34	5.25751	3	1508.67	0.232553	27.7327	1
	High	IPDPEAVKPDDWDEDAPAK	1	3	1	B4E2T8		0	743033	0.321841	1		0.002	0.009272	13.87	21.7695	3	2107.98	0.833244	37.7212	0
J3KS93	Eukaryotic initiation factor 4A-I (Fragment) OS=Homo sapiens GN=EIF4A1 PE=1 SV=1 - [J3KS93_HUMAN]	85.14	35.29	17	2	2	6	739778	0.788758	5	38.2323	85	9.3477	4.42432
	A2	Sequence	# PSMs	# Proteins	# Protein Groups	Protein Group Accessions	Modifications	ΔCn	Area	Heavy/Light	Heavy/Light Count	Heavy/Light Variability [%]	q-Value	PEP	IonScore	Exp Value	Charge	MH+ [Da]	ΔM [ppm]	RT [min]	# Missed Cleavages
	High	GYDVIAQAQSGTGK	4	17	1	J3KS93		0	758794	1.0119	3	18.8149	0	4.35e-06	52.67	0.00149356	2	1394.69	1.39777	30.9058	0
	High	GIYAYGFEKPSAIQQR	2	17	1	J3KS93		0	720763	0.613385	2	23.189	0	0.0007847	23.53	1.7975	3	1827.94	0.53732	37.1966	0
Q9NTI5-2	Isoform 2 of Sister chromatid cohesion protein PDS5 homolog B OS=Homo sapiens GN=PDS5B - [PDS5B_HUMAN]	77.74	2.59	2	2	2	8	838203	0.791048	5	25.7014	1391	158.18	8.5874
	A2	Sequence	# PSMs	# Proteins	# Protein Groups	Protein Group Accessions	Modifications	ΔCn	Area	Heavy/Light	Heavy/Light Count	Heavy/Light Variability [%]	q-Value	PEP	IonScore	Exp Value	Charge	MH+ [Da]	ΔM [ppm]	RT [min]	# Missed Cleavages
	High	AEsPESSAIESTQSTPQK	3	2	1	Q9NTI5-2	S3(Phospho)	0	1.09763e+06	0.930181	3	1.27037	0	0.0001625	33.39	0.154783	2	1956.85	1.41897	27.2596	0
	High	mETVSNASSSSNPSsPGR	2	2	1	Q9NTI5-2	M1(Oxidation); S15(Phospho)	0	578777	0.602619	2	5.92854	0	4.129e-05	29.11	0.259665	2	1890.76	0.893464	19.2922	0
	High	mETVSNASSSSNPSsPGr	1	2	1	Q9NTI5-2	M1(Oxidation); S15(Phospho); R18(Arg10)	0	335122				0	0.004656	24.19	0.85797	2	1900.76	0.969702	19.7904	0
	High	AEsPESSAIESTQSTPQk	2	2	1	Q9NTI5-2	S3(Phospho); K18(Lys8)	0	1.02978e+06				0	0.00314	18.47	5.37996	2	1964.86	1.76617	27.576	0
Q9NR30-2	Isoform 2 of Nucleolar RNA helicase 2 OS=Homo sapiens GN=DDX21 - [DDX21_HUMAN]	77.66	3.64	2	2	2	11	4.68362e+06	0.307061	8	6.70475	715	79.6074	9.37842
	A2	Sequence	# PSMs	# Proteins	# Protein Groups	Protein Group Accessions	Modifications	ΔCn	Area	Heavy/Light	Heavy/Light Count	Heavy/Light Variability [%]	q-Value	PEP	IonScore	Exp Value	Charge	MH+ [Da]	ΔM [ppm]	RT [min]	# Missed Cleavages
	High	NEEPsEEEIDAPKPK	6	2	1	Q9NR30-2	S5(Phospho)	0	8.70882e+06	0.307061	6	5.61019	0	1.072e-05	42.44	0.0163124	2	1791.77	1.27095	25.6696	0
	High	APQVLVLAPTR	2	2	1	Q9NR30-2		0	658424	0.371943	2	33.2533	0	0.005066	32.65	0.0456059	2	1164.71	0.0233846	37.7119	0
	High	NEEPsEEEIDAPkPk	3	2	1	Q9NR30-2	S5(Phospho); K13(Lys8); K15(Lys8)	0	2.51691e+06				0	0.002966	29.67	0.368676	2	1807.8	1.21671	25.7323	0
Q9UKM9-2	Isoform 1 of RNA-binding protein Raly OS=Homo sapiens GN=RALY - [RALY_HUMAN]	75.77	14.48	2	2	2	6	4.47127e+06	0.89161	4	4.48971	290	30.3458	9.62744
	A2	Sequence	# PSMs	# Proteins	# Protein Groups	Protein Group Accessions	Modifications	ΔCn	Area	Heavy/Light	Heavy/Light Count	Heavy/Light Variability [%]	q-Value	PEP	IonScore	Exp Value	Charge	MH+ [Da]	ΔM [ppm]	RT [min]	# Missed Cleavages
	High	GRLsPVPVPR	1	2	1	Q9UKM9-2	S4(Phospho)	0	5.42359e+06	0.631844	1		0	1.528e-06	62.6	0.000102929	2	1157.62	0.681006	29.6547	1
	High	TRDDGDEEGLLTHSEEELEHSQDtDADDGALQ	3	2	1	Q9UKM9-2	T24(Phospho)	0	3.51896e+06	0.895948	3	1.43903	0	7.551e-07	34.16	0.278687	3	3607.45	2.01756	37.7305	1
	High	TrDDGDEEGLLTHsEEELEHSQDTDADDGALQ	2	2	1	Q9UKM9-2	R2(Arg10); S14(Phospho)	0	2.24228e+06				0	0.0001482	18.94	9.73923	3	3617.46	1.58208	37.7239	1
Q96PK6	RNA-binding protein 14 OS=Homo sapiens GN=RBM14 PE=1 SV=2 - [RBM14_HUMAN]	75.4	10.16	1	3	3	8	3.9981e+06	0.328491	7	128.903	669	69.4489	9.67139
	A2	Sequence	# PSMs	# Proteins	# Protein Groups	Protein Group Accessions	Modifications	ΔCn	Area	Heavy/Light	Heavy/Light Count	Heavy/Light Variability [%]	q-Value	PEP	IonScore	Exp Value	Charge	MH+ [Da]	ΔM [ppm]	RT [min]	# Missed Cleavages
	High	IFVGNVSAAcTSQELR	1	1	1	Q96PK6	C10(Carbamidomethyl)	0	488794	0.934619	1		0	2.657e-05	42.3	0.0232387	2	1751.88	2.84774	38.0568	0
	High	ASYVAPLTAQPATYR	2	1	1	Q96PK6		0	632151	0.685401	2	10.1292	0	4.307e-05	31.94	0.210889	2	1608.84	1.12506	36.286	0
	High	GQPGNAYDGAGQPSAAYLSmSQGAVANANStPPPYER	5	1	1	Q96PK6	M20(Oxidation); T31(Phospho)	0	10873344	0.180123	4	10.3466	0	1.103e-08	30.33	1.10455	3	3790.64	0.144867	40.0108	0
K7EMV3	Histone H3 OS=Homo sapiens GN=H3F3B PE=1 SV=1 - [K7EMV3_HUMAN]	73.5281	17.39	11	2	2	12	2.93402e+07	0.826348	7	4.5192	92	10.3278	11.8247
	A2	Sequence	# PSMs	# Proteins	# Protein Groups	Protein Group Accessions	Modifications	ΔCn	Area	Heavy/Light	Heavy/Light Count	Heavy/Light Variability [%]	q-Value	PEP	IonScore	Exp Value	Charge	MH+ [Da]	ΔM [ppm]	RT [min]	# Missed Cleavages
	High	YRPGTVALR	5	11	1	K7EMV3		0	2.82225e+07	0.804258	5	4.01895	0	2.817e-06	46.01	0.00306998	3	1032.6	0.219005	24.5945	0
	High	STELLIR	2	11	1	K7EMV3		0	3.04578e+07	0.872721	1		0	0.001568	37.18	0.0193723	2	831.494	0.483164	31.218	0
	High	YrPGTVALr	3	11	1	K7EMV3	R2(Arg10); R9(Arg10)	0	1.51939e+07				0	0.0001673	36.68	0.0293071	3	1052.61	0.0432878	24.91	0
	High	STELLIr	2	11	1	K7EMV3	R7(Arg10)	0	2.85413e+07	0.940146	1		0.002	0.01178	27.01	0.159254	2	841.502	0.370123	30.4925	0
D6RAF8	Heterogeneous nuclear ribonucleoprotein D0 (Fragment) OS=Homo sapiens GN=HNRNPD PE=1 SV=1 - [D6RAF8_HUMAN]	70.1333	14.48	3	2	2	4	2.26032e+06	0.597154	3	28.1174	221	23.0622	5.10986
	A2	Sequence	# PSMs	# Proteins	# Protein Groups	Protein Group Accessions	Modifications	ΔCn	Area	Heavy/Light	Heavy/Light Count	Heavy/Light Variability [%]	q-Value	PEP	IonScore	Exp Value	Charge	MH+ [Da]	ΔM [ppm]	RT [min]	# Missed Cleavages
	High	IFVGGLSPDTPEEk	2	3	1	D6RAF8	K14(Lys8)	0	653120	0.544108	2	13.858	0	0.0003324	42.86	0.0157844	2	1496.77	0.526859	37.5516	0
	High	IFVGGLSPDTPEEK	1	3	1	D6RAF8		0	1.23164e+06				0	9.103e-06	40.13	0.0301004	2	1488.76	0.80177	37.5219	0
	High	IDASKNEEDEGHSNsSPR	1	3	1	D6RAF8	S15(Phospho)	0	3.28901e+06	0.934994	1		0.008	0.04834	14.8	9.29485	3	2051.83	0.42283	15.8881	1
J3QSV6	Ribosomal L1 domain-containing protein 1 (Fragment) OS=Homo sapiens GN=RSL1D1 PE=1 SV=1 - [J3QSV6_HUMAN]	66.67	6.74	2	2	2	10	1.38423e+07	0.460913	6	11.5293	430	48.1791	10.0229
	A2	Sequence	# PSMs	# Proteins	# Protein Groups	Protein Group Accessions	Modifications	ΔCn	Area	Heavy/Light	Heavy/Light Count	Heavy/Light Variability [%]	q-Value	PEP	IonScore	Exp Value	Charge	MH+ [Da]	ΔM [ppm]	RT [min]	# Missed Cleavages
	High	TVSQIISLQTLK	3	2	1	J3QSV6		0	815995	0.500565	3	2.55882	0	0.004712	43.56	0.00395398	2	1330.8	1.11852	44.3381	0
	High	ATNEsEDEIPQLVPIGk	4	2	1	J3QSV6	S5(Phospho); K17(Lys8)	0	1.15571e+07	0.430234	2	0.534645	0	0.0002202	27.64	0.796795	2	1927.92	1.53974	47.2379	0
	High	ATNEsEDEIPQLVPIGK	3	2	1	J3QSV6	S5(Phospho)	0	2.68686e+07	0.418543	1		0.002	0.008885	17.2	8.77179	2	1919.9	0.358349	47.4255	0
Q9H3N1	Thioredoxin-related transmembrane protein 1 OS=Homo sapiens GN=TMX1 PE=1 SV=1 - [TMX1_HUMAN]	62.32	7.5	1	2	2	5	707715	0.668574	4	9.86963	280	31.7708	4.98291
	A2	Sequence	# PSMs	# Proteins	# Protein Groups	Protein Group Accessions	Modifications	ΔCn	Area	Heavy/Light	Heavy/Light Count	Heavy/Light Variability [%]	q-Value	PEP	IonScore	Exp Value	Charge	MH+ [Da]	ΔM [ppm]	RT [min]	# Missed Cleavages
	High	VEEEQEADEEDVsEEEAESK	3	1	1	Q9H3N1	S13(Phospho)	0	1.11304e+06	0.675373	3	3.00052	0	6.621e-05	31.54	0.1351	2	2389.9	1.27087	27.4041	0
	High	KVEEEQEADEEDVsEEEAESK	1	1	1	Q9H3N1	S14(Phospho)	0	302390	0.576772	1		0	0.003546	23.75	1.42196	2	2517.99	0.430832	25.8564	1
	High	VEEEQEADEEDVsEEEAESk	1	1	1	Q9H3N1	S13(Phospho); K20(Lys8)	0	176671				0.003	0.02016	13.25	10.1657	2	2397.91	0.130473	27.3978	0
Q5T6W2	Heterogeneous nuclear ribonucleoprotein K (Fragment) OS=Homo sapiens GN=HNRNPK PE=1 SV=1 - [Q5T6W2_HUMAN]	61.417	9.5	4	2	2	10	653297	0.595936	6	3.97947	379	41.7807	5.59229
	A2	Sequence	# PSMs	# Proteins	# Protein Groups	Protein Group Accessions	Modifications	ΔCn	Area	Heavy/Light	Heavy/Light Count	Heavy/Light Variability [%]	q-Value	PEP	IonScore	Exp Value	Charge	MH+ [Da]	ΔM [ppm]	RT [min]	# Missed Cleavages
	High	GSYGDLGGPIITTQVTIPk	3	4	1	Q5T6W2	K19(Lys8)	0	308151	0.572707	1		0	7.945e-07	39.87	0.0285468	2	1925.06	4.18222	47.2905	0
	High	GSYGDLGGPIITTQVTIPK	3	4	1	Q5T6W2		0	422769	0.658216	2	15.2073	0	3.178e-05	31.74	0.207162	2	1917.04	3.0738	47.7376	0
	High	TDYNASVSVPDSSGPEr	2	4	1	Q5T6W2	R17(Arg10)	0	484000	0.60866	2	5.19689	0	0.0003222	25.51	1.03576	2	1790.81	2.07845	30.6963	0
	High	TDYNASVSVPDSSGPER	2	4	1	Q5T6W2		0	883825	0.597479	1		0	6.197e-05	19.82	3.67625	2	1780.8	2.82631	30.6904	0
A0A0A0MR02	Voltage-dependent anion-selective channel protein 2 (Fragment) OS=Homo sapiens GN=VDAC2 PE=4 SV=1 - [A0A0A0MR02_HUMAN]	60.3857	14.89	4	3	3	9	1.08415e+06	0.917502	5	30.2746	282	30.3289	7.81104
	A2	Sequence	# PSMs	# Proteins	# Protein Groups	Protein Group Accessions	Modifications	ΔCn	Area	Heavy/Light	Heavy/Light Count	Heavy/Light Variability [%]	q-Value	PEP	IonScore	Exp Value	Charge	MH+ [Da]	ΔM [ppm]	RT [min]	# Missed Cleavages
	High	VNNSSLIGVGYTQTLRPGVK	4	4	1	A0A0A0MR02		0	1.05041e+06	0.786698	2	23.1036	0	0.003657	36.55	0.0584146	3	2103.16	1.67062	40.2026	0
	High	LTLSALVDGK	1	4	1	A0A0A0MR02		0	505749	1.00036	1		0	0.005076	26.55	0.198404	2	1016.6	-0.430981	42.8108	0
	High	VNNSSLIGVGYTQTLrPGVk	3	4	1	A0A0A0MR02	R16(Arg10); K20(Lys8)	0	799859	0.720008	1		0	0.003534	22.06	1.34977	3	2121.18	0.214388	39.7556	0
	High	YQLDPTASISAK	1	4	1	A0A0A0MR02		0	1.69628e+06	1.12035	1		0.004	0.02674	28.08	0.394748	2	1293.67	0.813162	34.6837	0
J3QLL0	Importin subunit alpha-1 (Fragment) OS=Homo sapiens GN=KPNA2 PE=1 SV=1 - [J3QLL0_HUMAN]	59.47	37.31	3	3	3	9	932856	0.280384	6	52.7328	134	15.2249	10.2134
	A2	Sequence	# PSMs	# Proteins	# Protein Groups	Protein Group Accessions	Modifications	ΔCn	Area	Heavy/Light	Heavy/Light Count	Heavy/Light Variability [%]	q-Value	PEP	IonScore	Exp Value	Charge	MH+ [Da]	ΔM [ppm]	RT [min]	# Missed Cleavages
	High	NVSSFPDDATsPLQENR	5	3	1	J3QLL0	S11(Phospho)	0	2.07461e+06	0.214345	3	19.6137	0	0.0003045	31.73	0.221773	2	1956.84	2.04397	37.0808	0
	High	GINSSNVENQLQATQAAR	2	3	1	J3QLL0		0	168373	0.306703	1		0	0.0002016	24.68	1.5812	2	1900.95	1.33267	34.0639	0
	High	NNQGTVNWSVDDIVK	2	3	1	J3QLL0		0	555584	0.434873	2	2.57863	0	0.00503	17.92	6.15071	2	1688.82	0.427078	43.7117	0
Q14739	Lamin-B receptor OS=Homo sapiens GN=LBR PE=1 SV=2 - [LBR_HUMAN]	54.1267	3.58	1	2	2	5	1.52626e+06	1.21526	4	4.88082	615	70.658	9.36377
	A2	Sequence	# PSMs	# Proteins	# Protein Groups	Protein Group Accessions	Modifications	ΔCn	Area	Heavy/Light	Heavy/Light Count	Heavy/Light Variability [%]	q-Value	PEP	IonScore	Exp Value	Charge	MH+ [Da]	ΔM [ppm]	RT [min]	# Missed Cleavages
	High	VVEGTPLIDGR	3	1	1	Q14739		0	1.26587e+06	1.24135	3	3.45845	0.004	0.02799	34.81	0.0546266	2	1155.64	0.534312	31.549	0
	High	sASASHQADIK	1	1	1	Q14739	S1(Phospho)	0	1.65729e+06	0.943613	1		0.004	0.0242	21.54	0.906982	2	1194.51	-0.135723	16.6144	0
	High	VVEGTPLIDGr	1	1	1	Q14739	R11(Arg10)	0	1.39522e+06				0.008	0.05305	17.46	2.90478	2	1165.64	-0.490245	31.8072	0
H0YIZ0	Serine hydroxymethyltransferase (Fragment) OS=Homo sapiens GN=SHMT2 PE=1 SV=1 - [H0YIZ0_HUMAN]	52.83	8.33	4	2	2	3	602106	1.12421	2	29.3594	264	28.7992	9.43701
	A2	Sequence	# PSMs	# Proteins	# Protein Groups	Protein Group Accessions	Modifications	ΔCn	Area	Heavy/Light	Heavy/Light Count	Heavy/Light Variability [%]	q-Value	PEP	IonScore	Exp Value	Charge	MH+ [Da]	ΔM [ppm]	RT [min]	# Missed Cleavages
	High	LIIAGTSAYAr	1	4	1	H0YIZ0	R11(Arg10)	0	868262	1.36483	1		0	1.16e-05	39.73	0.0182022	2	1145.66	0.870504	33.7572	0
	High	VLELVSITANk	2	4	1	H0YIZ0	K11(Lys8)	0	335950	0.926015	1		0	0.0004521	28.45	0.135816	2	1194.72	0.00928069	41.3475	0
D6R9P3	Heterogeneous nuclear ribonucleoprotein A/B OS=Homo sapiens GN=HNRNPAB PE=1 SV=1 - [D6R9P3_HUMAN]	52.5806	8.57	6	1	2	7	668293	0.65978	6	17.5388	280	30.284	7.91357
	A2	Sequence	# PSMs	# Proteins	# Protein Groups	Protein Group Accessions	Modifications	ΔCn	Area	Heavy/Light	Heavy/Light Count	Heavy/Light Variability [%]	q-Value	PEP	IonScore	Exp Value	Charge	MH+ [Da]	ΔM [ppm]	RT [min]	# Missed Cleavages
	High	FGEVVDcTIk	1	6	2	D6R9P3;D6RAF8	C7(Carbamidomethyl); K10(Lys8)	0	333286	0.747329	1		0	6.845e-05	49.95	0.00215719	2	1175.59	0.247365	34.053	0
	High	IFVGGLNPEATEEK	2	6	1	D6R9P3		0	662314	0.387946	2	67.0035	0	0.000146	22.38	1.64526	2	1503.77	1.17588	38.2911	0
	High	FGEVVDcTIK	3	6	2	D6R9P3;D6RAF8	C7(Carbamidomethyl)	0	674272	0.693169	3	9.68017	0.002	0.01492	33.62	0.0920293	2	1167.57	0.491433	33.1535	0
	High	IFVGGLNPEATEEk	1	6	1	D6R9P3	K14(Lys8)	0	318671				0.003	0.01922	13.35	13.4599	2	1511.79	1.95141	38.2852	0
Q9Y2X3	Nucleolar protein 58 OS=Homo sapiens GN=NOP58 PE=1 SV=1 - [NOP58_HUMAN]	52.1267	8.7	1	4	4	8	2.51174e+06	0.356716	7	20.5999	529	59.5405	8.92432
	A2	Sequence	# PSMs	# Proteins	# Protein Groups	Protein Group Accessions	Modifications	ΔCn	Area	Heavy/Light	Heavy/Light Count	Heavy/Light Variability [%]	q-Value	PEP	IonScore	Exp Value	Charge	MH+ [Da]	ΔM [ppm]	RT [min]	# Missed Cleavages
	High	TQLYEYLQNR	1	1	1	Q9Y2X3		0	494095	0.915667	1		0	0.003339	28.61	0.361517	2	1327.66	-0.276736	38.4153	0
	High	EEPLsEEEPcTSTAIAsPEK	3	1	1	Q9Y2X3	S5(Phospho); C10(Carbamidomethyl); S17(Phospho)	0	4.64168e+06	0.351843	3	6.61851	0	7.789e-07	27.94	0.505865	2	2363.93	1.86256	36.4405	0
	High	HIKEEPLsEEEPcTSTAIAsPEK	1	1	1	Q9Y2X3	S8(Phospho); C13(Carbamidomethyl); S20(Phospho)	0	2.275e+06	0.356716	1		0	0.002443	23.56	2.84246	3	2742.17	2.0109	33.1814	1
	High	SQmDGLIPGVEPR	1	1	1	Q9Y2X3	M3(Oxidation)	0	618547	0.571171	1		0.002	0.01218	17.07	5.62306	2	1414.7	1.33407	36.1775	0
	High	EEPLsEEEPcTSTAIAsPEk	1	1	1	Q9Y2X3	S5(Phospho); C10(Carbamidomethyl); S17(Phospho); K20(Lys8)	0	1.4304e+06				0.002	0.008433	15.27	9.3236	2	2371.94	-0.218683	36.3972	0
	High	EEPLsEEEPcTSTAIASPEK	1	1	1	Q9Y2X3	S5(Phospho); C10(Carbamidomethyl)	0	284355	0.0153178	1		0.008	0.05228	16.5	10.9854	2	2283.98	8.13735	36.722	0
K7EJT5	60S ribosomal protein L22 (Fragment) OS=Homo sapiens GN=RPL22 PE=1 SV=1 - [K7EJT5_HUMAN]	51.98	51.06	7	2	2	2	404100	0.0115119	1		47	5.07968	9.42236
	A2	Sequence	# PSMs	# Proteins	# Protein Groups	Protein Group Accessions	Modifications	ΔCn	Area	Heavy/Light	Heavy/Light Count	Heavy/Light Variability [%]	q-Value	PEP	IonScore	Exp Value	Charge	MH+ [Da]	ΔM [ppm]	RT [min]	# Missed Cleavages
	High	ITVTSEVPFSK	1	7	1	K7EJT5		0	486644	0.0115119	1		0	0.0007587	41.31	0.0156057	2	1207.66	0.384986	37.0206	0
	High	AGNLGGGVVTIER	1	7	1	K7EJT5		0	321557				0	0.003992	28.17	0.311364	2	1242.68	0.450929	33.2224	0
P35579-2	Isoform 2 of Myosin-9 OS=Homo sapiens GN=MYH9 - [MYH9_HUMAN]	50.373	2.46	2	3	3	7	2.19681e+06	0.803683	7	70.0302	1382	159.764	5.97314
	A2	Sequence	# PSMs	# Proteins	# Protein Groups	Protein Group Accessions	Modifications	ΔCn	Area	Heavy/Light	Heavy/Light Count	Heavy/Light Variability [%]	q-Value	PEP	IonScore	Exp Value	Charge	MH+ [Da]	ΔM [ppm]	RT [min]	# Missed Cleavages
	High	ALELDSNLYr	3	2	1	P35579-2	R10(Arg10)	0	931953	1.52864	3	16.8386	0	0.001884	37.79	0.0375183	2	1203.63	1.05319	38.0158	0
	High	kGAGDGsDEEVDGkADGAEAkPAE	1	2	1	P35579-2	K1(Lys8); S7(Phospho); K14(Lys8); K21(Lys8)	0	5.12944e+06	0.444457	1		0	0.0002957	31.86	0.348621	3	2407.04	1.18995	21.0679	2
	High	GAGDGsDEEVDGKADGAEAKPAE	2	2	1	P35579-2	S6(Phospho)	0	529027	0.700358	2	20.6168	0	0.000755	30.99	0.22603	2	2254.9	1.30049	23.1752	1
	High	KGAGDGsDEEVDGKADGAEAKPAE	1	2	1	P35579-2	S7(Phospho)	0	1.12294e+06	0.524855	1		0.007	0.04122	17.79	7.44044	2	2382.99	0.308823	21.4625	2
Q9UBM7	7-dehydrocholesterol reductase OS=Homo sapiens GN=DHCR7 PE=1 SV=1 - [DHCR7_HUMAN]	47.37	9.05	1	3	3	3	656428	0.48055	3	25.605	475	54.4538	8.70459
	A2	Sequence	# PSMs	# Proteins	# Protein Groups	Protein Group Accessions	Modifications	ΔCn	Area	Heavy/Light	Heavy/Light Count	Heavy/Light Variability [%]	q-Value	PEP	IonScore	Exp Value	Charge	MH+ [Da]	ΔM [ppm]	RT [min]	# Missed Cleavages
	High	YTAAVPYR	1	1	1	Q9UBM7		0	1.09625e+06	0.48055	1		0	0.001386	36.71	0.0316864	2	940.489	-0.21196	26.9984	0
	High	FLPGYVGGIQEGAVTPAGVVNK	1	1	1	Q9UBM7		0	385486	0.0387967	1		0	1.795e-05	29.66	0.37715	2	2173.17	3.50081	46.2201	0
	High	VIEcSYTSADGQR	1	1	1	Q9UBM7	C4(Carbamidomethyl)	0	487551	0.569581	1		0.002	0.01494	11.61	16.3966	2	1485.66	-0.013019	24.5078	0
C9J9K3	40S ribosomal protein SA (Fragment) OS=Homo sapiens GN=RPSA PE=1 SV=2 - [C9J9K3_HUMAN]	40.63	14.45	4	3	3	5	533714	0.657835	4	10.9343	263	29.386	5.24951
	A2	Sequence	# PSMs	# Proteins	# Protein Groups	Protein Group Accessions	Modifications	ΔCn	Area	Heavy/Light	Heavy/Light Count	Heavy/Light Variability [%]	q-Value	PEP	IonScore	Exp Value	Charge	MH+ [Da]	ΔM [ppm]	RT [min]	# Missed Cleavages
	High	AIVAIENPADVSVISSR	3	4	1	C9J9K3		0	495616	0.583058	2	25.8888	0	2.379e-07	31.28	0.200891	2	1740.95	0.0775719	44.8922	0
	High	FAAATGATPIAGR	1	4	1	C9J9K3		0	538905	0.625047	1		0	0.004196	20.57	1.81101	2	1203.65	0.809331	29.0412	0
	High	LLVVTDPR	1	4	1	C9J9K3		0	566621	0.724072	1		0.002	0.01304	32.35	0.0476743	2	912.552	0.307934	31.7042	0
F8WBS8	26S proteasome non-ATPase regulatory subunit 2 OS=Homo sapiens GN=PSMD2 PE=1 SV=1 - [F8WBS8_HUMAN]	38.97	42.37	3	2	2	6	1.26527e+06	0.357868	6	4.57686	59	6.57933	9.40771
	A2	Sequence	# PSMs	# Proteins	# Protein Groups	Protein Group Accessions	Modifications	ΔCn	Area	Heavy/Light	Heavy/Light Count	Heavy/Light Variability [%]	q-Value	PEP	IonScore	Exp Value	Charge	MH+ [Da]	ΔM [ppm]	RT [min]	# Missed Cleavages
	High	APVQPQQsPAAAPGGTDEKPSGK	3	3	1	F8WBS8	S8(Phospho)	0	1.10182e+06	0.355178	3	6.91969	0	1.799e-06	32.32	0.36915	3	2298.08	0.489292	22.4792	0
	High	DKAPVQPQQsPAAAPGGTDEKPSGK	3	3	1	F8WBS8	S10(Phospho)	0	1.42872e+06	0.360221	3	1.94288	0	9.089e-06	30.72	0.676299	3	2541.2	1.96674	22.0498	1
Q08211	ATP-dependent RNA helicase A OS=Homo sapiens GN=DHX9 PE=1 SV=4 - [DHX9_HUMAN]	38.79	2.2	1	2	2	6	561503	0.59681	4	21.1903	1270	140.869	6.84424
	A2	Sequence	# PSMs	# Proteins	# Protein Groups	Protein Group Accessions	Modifications	ΔCn	Area	Heavy/Light	Heavy/Light Count	Heavy/Light Variability [%]	q-Value	PEP	IonScore	Exp Value	Charge	MH+ [Da]	ΔM [ppm]	RT [min]	# Missed Cleavages
	High	AAEcNIVVTQPR	2	1	1	Q08211	C4(Carbamidomethyl)	0	677784	0.655151	2	21.1903	0	0.0008189	39.52	0.0308645	2	1357.69	0.129208	27.9132	0
	High	ELDALDANDELTPLGR	2	1	1	Q08211		0	445222	0.0200528	1		0	0.005393	11.81	26.7921	2	1741.86	1.13154	45.1199	0
	High	AAEcNIVVTQPr	1	1	1	Q08211	C4(Carbamidomethyl); R12(Arg10)	0	511475				0.003	0.01931	16.77	5.33939	2	1367.7	1.31178	27.9188	0
	High	ELDALDANDELTPLGr	1	1	1	Q08211	R16(Arg10)	0	295119	0.626214	1		0.007	0.04614	15.4	11.9889	2	1751.87	1.14322	45.5092	0
Q96JM3	Chromosome alignment-maintaining phosphoprotein 1 OS=Homo sapiens GN=CHAMP1 PE=1 SV=2 - [CHAP1_HUMAN]	38.04	4.68	1	2	2	6	3.21525e+06	0.25262	5	9.81596	812	89.0429	8.44092
	A2	Sequence	# PSMs	# Proteins	# Protein Groups	Protein Group Accessions	Modifications	ΔCn	Area	Heavy/Light	Heavy/Light Count	Heavy/Light Variability [%]	q-Value	PEP	IonScore	Exp Value	Charge	MH+ [Da]	ΔM [ppm]	RT [min]	# Missed Cleavages
	High	LAPVPsPEPQKPAPVSPEsVK	4	1	1	Q96JM3	S6(Phospho); S19(Phospho)	0	5.60294e+06	0.250539	3	1.22646	0	4.887e-05	38.04	0.100079	3	2314.12	1.57433	35.4753	0
	High	DNQESsDAELSSSEYIK	2	1	1	Q96JM3	S6(Phospho)	0	827563	0.721826	2	7.83576	0.007	0.0404	11.46	16.8871	2	1981.8	2.02304	34.0952	0
Q00610-2	Isoform 2 of Clathrin heavy chain 1 OS=Homo sapiens GN=CLTC - [CLH1_HUMAN]	34.08	1.89	3	2	2	6	624563	1.16514	4	7.90204	1639	187.771	5.69385
	A2	Sequence	# PSMs	# Proteins	# Protein Groups	Protein Group Accessions	Modifications	ΔCn	Area	Heavy/Light	Heavy/Light Count	Heavy/Light Variability [%]	q-Value	PEP	IonScore	Exp Value	Charge	MH+ [Da]	ΔM [ppm]	RT [min]	# Missed Cleavages
	High	NNLAGAEELFAr	1	3	1	Q00610-2	R12(Arg10)	0	139303	1.09635	1		0	0.0004729	34.08	0.0976711	2	1314.67	2.11266	42.1806	0
	High	LASTLVHLGEYQAAVDGAR	3	3	1	Q00610-2		0	901897	1.21947	3	6.72953	0	0.001897	23.46	1.86345	3	1971.03	-0.0244554	42.5599	0
	High	LASTLVHLGEYQAAVDGAr	2	3	1	Q00610-2	R19(Arg10)	0	1.10982e+06				0	0.0009694	17.92	6.51394	3	1981.04	1.40895	42.8957	0
Q12906-4	Isoform 4 of Interleukin enhancer-binding factor 3 OS=Homo sapiens GN=ILF3 - [ILF3_HUMAN]	28	7.88	3	2	2	2	1.26453e+06	0.0994917	2	2641.47	698	75.4608	8.41162
	A2	Sequence	# PSMs	# Proteins	# Protein Groups	Protein Group Accessions	Modifications	ΔCn	Area	Heavy/Light	Heavy/Light Count	Heavy/Light Variability [%]	q-Value	PEP	IonScore	Exp Value	Charge	MH+ [Da]	ΔM [ppm]	RT [min]	# Missed Cleavages
	High	GEDsAEETEAKPAVVAPAPVVEAVSTPSAAFPSDATAENVK	1	3	1	Q12906-4	S4(Phospho)	0	1.973e+06	0.0177068	1		0	0.0002913	14.14	52.1687	3	4118.93	0.216767	49.1191	0
	High	RPmEEDGEEKsPSK	1	3	1	Q12906-4	M3(Oxidation); S11(Phospho)	0	556072	0.559028	1		0.003	0.01992	28	0.30319	3	1714.7	0.713361	13.3568	1
P22695	Cytochrome b-c1 complex subunit 2, mitochondrial OS=Homo sapiens GN=UQCRC2 PE=1 SV=3 - [QCR2_HUMAN]	24.02	7.28	1	2	2	3	703788	1.09602	2	14.26	453	48.4129	8.63135
	A2	Sequence	# PSMs	# Proteins	# Protein Groups	Protein Group Accessions	Modifications	ΔCn	Area	Heavy/Light	Heavy/Light Count	Heavy/Light Variability [%]	q-Value	PEP	IonScore	Exp Value	Charge	MH+ [Da]	ΔM [ppm]	RT [min]	# Missed Cleavages
	High	TIAQGNLSNTDVQAAk	2	1	1	P22695	K16(Lys8)	0	963818	1.09602	2	14.26	0	0.003092	24.02	1.31188	2	1638.86	1.22048	28.1666	0
	High	SmAASGNLGHTPFVDEL	1	1	1	P22695	M2(Oxidation)	0	443758				0.001	0.007703	14.83	12.9633	2	1761.81	-1.03329	45.1628	0
P67809	Nuclease-sensitive element-binding protein 1 OS=Homo sapiens GN=YBX1 PE=1 SV=3 - [YBOX1_HUMAN]	23.45	16.05	3	3	3	7	1.37884e+06	0.671301	6	19.0402	324	35.9027	9.87646
	A2	Sequence	# PSMs	# Proteins	# Protein Groups	Protein Group Accessions	Modifications	ΔCn	Area	Heavy/Light	Heavy/Light Count	Heavy/Light Variability [%]	q-Value	PEP	IonScore	Exp Value	Charge	MH+ [Da]	ΔM [ppm]	RT [min]	# Missed Cleavages
	High	NEGSEsAPEGQAQQR	1	3	1	P67809	S6(Phospho)	0	1.24752e+06	0.603418	1		0	0.001481	23.49	0.771186	2	1667.67	1.19922	17.0047	0
	High	EDGNEEDkENQGDETQGQQPPQr	1	2	1	P67809	K8(Lys8); R23(Arg10)	0	1.1633e+06	0.68853	1		0	5.002e-05	20.83	5.08674	3	2646.13	0.569755	17.8706	1
	High	NYQQNYQNSEsGEKNEGSESAPEGQAQQR	3	3	1	P67809	S11(Phospho)	0	1.16203e+06	0.77835	3	22.1898	0.003	0.02042	16.67	15.1222	3	3337.37	2.08539	23.486	1
	High	NEGSEsAPEGQAQQr	1	3	1	P67809	S6(Phospho); R15(Arg10)	0	752774				0.005	0.03105	17.46	3.06271	2	1677.68	1.79311	17.0589	0
	High	EDGNEEDKENQGDETQGQQPPQR	1	2	1	P67809		0	1.72699e+06	0.654502	1		0.007	0.04054	18.59	8.01984	3	2628.11	0.901486	17.954	1
A0A087WV66	Antigen KI-67 OS=Homo sapiens GN=MKI67 PE=1 SV=1 - [A0A087WV66_HUMAN]	23.32	1.11	2	2	2	5	2.13499e+06	0.892511	5	6.88596	3255	358.407	9.42236
	A2	Sequence	# PSMs	# Proteins	# Protein Groups	Protein Group Accessions	Modifications	ΔCn	Area	Heavy/Light	Heavy/Light Count	Heavy/Light Variability [%]	q-Value	PEP	IonScore	Exp Value	Charge	MH+ [Da]	ΔM [ppm]	RT [min]	# Missed Cleavages
	High	SGGSGHAVAEPAsPEQELDQNK	2	2	1	A0A087WV66	S13(Phospho)	0	1.90867e+06	0.487961	2	65.4401	0	0.0003382	17.08	9.13213	3	2287.99	1.29792	29.5212	0
	High	TPVQYSQQQNsPQK	2	2	1	A0A087WV66	S11(Phospho)	0	2.24423e+06	0.913455	2	3.43993	0.002	0.01353	23.32	1.43587	2	1712.76	0.125794	20.7617	0
	High	TPVQYSQQQNsPQk	1	2	1	A0A087WV66	S11(Phospho); K14(Lys8)	0	2.3613e+06	0.896354	1		0.002	0.01426	14.33	12.0545	2	1720.78	0.882963	21.3139	0
Q9UQ35	Serine/arginine repetitive matrix protein 2 OS=Homo sapiens GN=SRRM2 PE=1 SV=2 - [SRRM2_HUMAN]	23.29	2.11	1	2	2	3	3.12917e+06	0.311199	3	14.5701	2752	299.438	12.0591
	A2	Sequence	# PSMs	# Proteins	# Protein Groups	Protein Group Accessions	Modifications	ΔCn	Area	Heavy/Light	Heavy/Light Count	Heavy/Light Variability [%]	q-Value	PEP	IonScore	Exp Value	Charge	MH+ [Da]	ΔM [ppm]	RT [min]	# Missed Cleavages
	High	HGGsPQPLATTPLSQEPVNPPSEASPtR	2	1	1	Q9UQ35	S4(Phospho); T27(Phospho)	0	4.17496e+06	0.326788	2	7.25634	0	4.679e-07	23.29	4.56484	3	3012.36	3.5114	39.4011	0
	High	mGQAPSQSLLPPAQDQPRsPVPSAFSDQSR	1	1	1	Q9UQ35	M1(Oxidation); S19(Phospho)	0	2.08337e+06	0.20988	1		0.002	0.01551	11.84	73.7775	3	3275.51	-0.262519	40.9969	1
Q8WYP5	Protein ELYS OS=Homo sapiens GN=AHCTF1 PE=1 SV=3 - [ELYS_HUMAN]	22.87	1.5	3	2	2	2	1.16073e+06	0.458302	2	35.4867	2266	252.342	6.59521
	A2	Sequence	# PSMs	# Proteins	# Protein Groups	Protein Group Accessions	Modifications	ΔCn	Area	Heavy/Light	Heavy/Light Count	Heavy/Light Variability [%]	q-Value	PEP	IonScore	Exp Value	Charge	MH+ [Da]	ΔM [ppm]	RT [min]	# Missed Cleavages
	High	STPLASPsPSPGRSPQR	1	3	1	Q8WYP5	S8(Phospho)	0	1.36521e+06	0.363302	1		0.003	0.01818	19.48	4.61926	2	1801.86	0.795329	24.3475	1
	High	SLPSSSQLkGsPQAISr	1	3	1	Q8WYP5	K9(Lys8); S11(Phospho); R17(Arg10)	0	956241	0.578143	1		0.004	0.02254	22.87	2.20071	2	1840.93	0.719636	30.4354	1
P06239	Tyrosine-protein kinase Lck OS=Homo sapiens GN=LCK PE=1 SV=6 - [LCK_HUMAN]	21.85	6.09	3	2	2	4	603632				509	57.9639	5.36377
	A2	Sequence	# PSMs	# Proteins	# Protein Groups	Protein Group Accessions	Modifications	ΔCn	Area	Heavy/Light	Heavy/Light Count	Heavy/Light Variability [%]	q-Value	PEP	IonScore	Exp Value	Charge	MH+ [Da]	ΔM [ppm]	RT [min]	# Missed Cleavages
	High	SVLEDFFTATEGQyQPQP	3	3	1	P06239	Y14(Phospho)	0	603632				0	8.273e-07	34.36	0.152658	2	2136.92	2.3201	59.2018	0
	High	AANILVSDTLSck	1	3	1	P06239	C12(Carbamidomethyl); K13(Lys8)	0	0				0.003	0.02175	19.37	3.25041	2	1399.74	7.1684	37.5487	0
P46087-2	Isoform 2 of Probable 28S rRNA (cytosine(4447)-C(5))-methyltransferase OS=Homo sapiens GN=NOP2 - [NOP2_HUMAN]	21.73	9.16	4	4	4	5	2.59325e+06	0.402644	5	140.571	808	88.9189	9.23193
	A2	Sequence	# PSMs	# Proteins	# Protein Groups	Protein Group Accessions	Modifications	ΔCn	Area	Heavy/Light	Heavy/Light Count	Heavy/Light Variability [%]	q-Value	PEP	IonScore	Exp Value	Charge	MH+ [Da]	ΔM [ppm]	RT [min]	# Missed Cleavages
	High	LVPTGLDFGQEGFTr	1	4	1	P46087-2	R15(Arg10)	0	323328	0.966551	1		0	0.00486	24.14	1.32662	2	1646.85	2.70239	46.6819	0
	High	GTDTQTPAVLSPsK	2	4	1	P46087-2	S13(Phospho)	0	3.3349e+06	0.381467	2	8.02315	0	0.0009727	19.56	3.11736	2	1481.69	0.995238	27.969	0
	High	EAAAGIQWsEEEtEDEEEEKEVTPESGPPK	1	4	1	P46087-2	S9(Phospho); T13(Phospho)	0	4.05574e+06	0.199074	1		0.004	0.02547	10.44	61.778	3	3490.4	0.87356	40.029	1
	High	VLLDAPcSGTGVISK	1	4	1	P46087-2	C7(Carbamidomethyl)	0	389104	0.966584	1		0.007	0.04268	19.8	2.97803	2	1516.8	-0.0215078	36.9482	0
Q8N8A6	ATP-dependent RNA helicase DDX51 OS=Homo sapiens GN=DDX51 PE=1 SV=3 - [DDX51_HUMAN]	21.72	2.4	1	2	2	4	1.55598e+06	0.418853	4	9.08551	666	72.4126	8.1626
	A2	Sequence	# PSMs	# Proteins	# Protein Groups	Protein Group Accessions	Modifications	ΔCn	Area	Heavy/Light	Heavy/Light Count	Heavy/Light Variability [%]	q-Value	PEP	IonScore	Exp Value	Charge	MH+ [Da]	ΔM [ppm]	RT [min]	# Missed Cleavages
	High	VNDAEPGsPEAPQGK	3	1	1	Q8N8A6	S8(Phospho)	0	2.33783e+06	0.443612	3	1.10472	0	0.0001166	17.06	4.17881	2	1575.67	0.468939	21.0525	0
	High	RVNDAEPGsPEAPQGK	1	1	1	Q8N8A6	S9(Phospho)	0	774129	0.379394	1		0.003	0.01694	21.72	2.11988	2	1731.77	1.45756	19.6138	1
Q03164-2	Isoform 2 of Histone-lysine N-methyltransferase 2A OS=Homo sapiens GN=KMT2A - [KMT2A_HUMAN]	21.01	1.12	3	2	2	3	1.13103e+06	0.248945	3	24.5138	3931	427.468	9.14404
	A2	Sequence	# PSMs	# Proteins	# Protein Groups	Protein Group Accessions	Modifications	ΔCn	Area	Heavy/Light	Heavy/Light Count	Heavy/Light Variability [%]	q-Value	PEP	IonScore	Exp Value	Charge	MH+ [Da]	ΔM [ppm]	RT [min]	# Missed Cleavages
	High	NSSTPGLQVPVSPtVPIQNQK	2	3	1	Q03164-2	T14(Phospho)	0	666808	0.270076	2	12.1227	0.002	0.01187	21.01	4.86913	2	2271.14	-0.928334	41.7738	0
	High	GPGEPDsPTPLHPPtPPILSTDR	1	3	1	Q03164-2	S7(Phospho); T15(Phospho)	0	1.59526e+06	0.0611402	1		0.006	0.03693	10.68	58.7303	3	2538.14	1.80336	46.0325	0
P31146	Coronin-1A OS=Homo sapiens GN=CORO1A PE=1 SV=4 - [COR1A_HUMAN]	0	8.68	4	3	3	3	502362	0.571216	3	2.75849	461	50.9938	6.68311
	A2	Sequence	# PSMs	# Proteins	# Protein Groups	Protein Group Accessions	Modifications	ΔCn	Area	Heavy/Light	Heavy/Light Count	Heavy/Light Variability [%]	q-Value	PEP	IonScore	Exp Value	Charge	MH+ [Da]	ΔM [ppm]	RT [min]	# Missed Cleavages
	High	VSQTTWDSGFcAVNPK	1	4	1	P31146	C11(Carbamidomethyl)	0	412657	0.571216	1		0	0.002286	11.61	28.7692	2	1796.83	0.222068	39.5169	0
	High	AAPEASGTPSSDAVSR	1	1	1	P31146		0	318112	0.560689	1		0.002	0.009124	15.46	8.19347	2	1502.71	1.27058	21.6767	0
	High	ILTTGFSr	1	4	1	P31146	R8(Arg10)	0	776317	1.83449	1		0.008	0.04955	20.93	0.950923	2	904.512	-0.707354	29.5264	0

## Sheet: Chromatin-bound
Accession	Description	Score	Coverage	# Proteins	# Unique Peptides	# Peptides	# PSMs	Area	Heavy/Light	Heavy/Light Count	Heavy/Light Variability [%]	# AAs	MW [kDa]	calc. pI
P22626	Heterogeneous nuclear ribonucleoproteins A2/B1 OS=Homo sapiens GN=HNRNPA2B1 PE=1 SV=2 - [ROA2_HUMAN]	989.637	38.53	2	9	9	55	1.28667e+07	0.847213	33	18.6339	353	37.4067	8.95361
	A2	Sequence	# PSMs	# Proteins	# Protein Groups	Protein Group Accessions	Modifications	ΔCn	Area	Heavy/Light	Heavy/Light Count	Heavy/Light Variability [%]	q-Value	PEP	IonScore	Exp Value	Charge	MH+ [Da]	ΔM [ppm]	RT [min]	# Missed Cleavages
	High	IDTIEIITDr	3	2	1	P22626	R10(Arg10)	0	4.08451e+06	0.89827	2	7.63236	0	6.841e-13	88.26	3.09083e-07	2	1198.66	0.468097	40.8459	0
	High	NMGGPYGGGNYGPGGSGGSGGYGGR	3	2	1	P22626		0	2.17726e+06	0.827212	2	5.19233	0	1.383e-19	86.72	7.3889e-07	2	2189.91	0.381888	30.8844	0
	High	IDTIEIITDR	3	2	1	P22626		0	5.21193e+06	0.93717	1		0	2.916e-10	70.77	1.73662e-05	2	1188.65	0.547998	41.2922	0
	High	NmGGPYGGGNYGPGGSGGSGGYGGr	6	2	1	P22626	M2(Oxidation); R25(Arg10)	0	1.06122e+07	0.799916	4	4.46786	0	5.825e-23	70.36	3.12401e-05	2	2215.91	2.35598	27.4889	0
	High	NmGGPYGGGNYGPGGSGGSGGYGGR	6	2	1	P22626	M2(Oxidation)	0	1.58186e+07	0.742449	2	0.590725	0	5.388e-18	60.2	0.000313381	2	2205.9	1.35618	26.8599	0
	High	NMGGPYGGGNYGPGGSGGSGGYGGr	3	2	1	P22626	R25(Arg10)	0	1.74594e+06	0.891	1		0	5.041e-13	54.06	0.00143826	2	2199.92	1.50437	30.2351	0
	High	GGNFGFGDSR	3	2	1	P22626		0	6.93208e+06	1.03142	3	7.57033	0	3.209e-07	45.96	0.00243753	2	1013.44	0.420374	28.7501	0
	High	GFGDGYNGYGGGPGGGNFGGsPGYGGGR	4	2	1	P22626	S21(Phospho)	0	2.71893e+06	0.683795	3	5.88677	0	3.241e-09	45.4	0.00932984	2	2575.01	0.91498	39.0267	0
	High	GGGGNFGPGPGSNFR	2	2	1	P22626		0	1.58494e+07	0.719832	1		0	4.883e-08	44.54	0.00747593	2	1377.63	1.00584	29.4983	0
	High	GFGFVTFDDHDPVDk	3	2	1	P22626	K15(Lys8)	0	1.53702e+06	0.853035	2	1.0154	0	2.16e-07	44.21	0.0125989	2	1703.78	0.866865	44.2739	0
	High	GFGFVTFDDHDPVDK	5	2	1	P22626		0	2.83279e+06	0.78661	3	7.48179	0	1.132e-05	42.9	0.0165808	2	1695.77	2.11762	44.2546	0
	High	GGGGNFGPGPGSNFr	3	2	1	P22626	R15(Arg10)	0	1.38603e+07	0.697835	2	1.19029	0	3.378e-08	38.18	0.0346381	2	1387.64	0.405699	29.3736	0
	High	GGNFGFGDSr	3	2	1	P22626	R10(Arg10)	0	6.77149e+06				0	0.000328	35.09	0.0320273	2	1023.45	0.0894968	28.7446	0
	High	LFIGGLSFETTEESLR	1	2	1	P22626		0	136506	0.894365	1		0	0.0002344	26.05	0.977361	2	1798.93	2.94427	53.8871	0
	High	GFGDGYNGYGGGPGGGNFGGSPGYGGGR	1	2	1	P22626		0	388285	0.615489	1		0	8.798e-07	19.3	5.71823	2	2495.05	3.00814	37.7847	0
	High	LTDcVVmR	2	2	1	P22626	C4(Carbamidomethyl); M7(Oxidation)	0	1.56229e+06	1.04748	2	14.4746	0.001	0.008793	22.83	0.721073	2	1009.48	-0.174368	22.2899	0
	High	LTDcVVmr	2	2	1	P22626	C4(Carbamidomethyl); M7(Oxidation); R8(Arg10)	0	1.72565e+06	1.04411	1		0.001	0.01291	20.72	1.26406	2	1019.49	-0.740167	22.939	0
	High	LTDcVVMR	1	2	1	P22626	C4(Carbamidomethyl)	0	543052	1.53543	1		0.003	0.02186	12.28	8.06299	2	993.485	-0.442125	27.2965	0
	High	TLETVPLEr	1	1	1	P22626	R9(Arg10)	0	619113	0.705499	1		0.005	0.04999	17.15	3.02911	2	1067.6	-0.0251057	31.4158	0
P51991-2	Isoform 2 of Heterogeneous nuclear ribonucleoprotein A3 OS=Homo sapiens GN=HNRNPA3 - [ROA3_HUMAN]	948.201	20.22	2	5	5	32	1.35694e+07	0.919826	17	8.03964	356	37.0062	8.30908
	A2	Sequence	# PSMs	# Proteins	# Protein Groups	Protein Group Accessions	Modifications	ΔCn	Area	Heavy/Light	Heavy/Light Count	Heavy/Light Variability [%]	q-Value	PEP	IonScore	Exp Value	Charge	MH+ [Da]	ΔM [ppm]	RT [min]	# Missed Cleavages
	High	SSGSPYGGGYGSGGGSGGYGSR	3	2	1	P51991-2		0	1.61522e+07	0.896922	1		0	1.765e-21	122.7	1.50745e-10	2	1910.79	1.74862	24.8208	0
	High	SSGsPYGGGYGSGGGSGGYGSR	3	2	1	P51991-2	S4(Phospho)	0	3.55831e+07	0.938969	2	2.8838	0	7.767e-16	103.79	7.42902e-09	2	1990.76	1.60581	25.1514	0
	High	SSGSPYGGGYGSGGGSGGYGSr	3	2	1	P51991-2	R22(Arg10)	0	1.28994e+07	0.900271	2	1.28022	0	1.128e-21	91.28	2.21483e-07	2	1920.8	0.993439	24.7886	0
	High	SSGsPYGGGYGSGGGSGGYGSr	4	2	1	P51991-2	S4(Phospho); R22(Arg10)	0	2.94912e+07	0.958898	1		0	4.758e-17	85.81	4.70785e-07	2	2000.77	1.61366	25.754	0
	High	IFVGGIkEDTEEYNLr	5	2	1	P51991-2	K7(Lys8); R16(Arg10)	0	1.90976e+06	0.945066	2	4.01496	0	2.524e-07	46.62	0.00866402	3	1900.98	1.29251	39.3234	1
	High	IFVGGIKEDTEEYNLR	5	2	1	P51991-2		0	1.94298e+06	0.859495	3	0.0149983	0	4.019e-13	45.39	0.0124935	3	1882.96	1.66519	38.8312	1
	High	WGTLTDcVVmr	3	2	1	P51991-2	C7(Carbamidomethyl); M10(Oxidation); R11(Arg10)	0	939156	1.13603	1		0	0.002137	39.43	0.027862	2	1363.64	1.21316	36.5497	0
	High	IETIEVMEDR	1	2	1	P51991-2		0	395786	1.08437	1		0	0.00177	35.85	0.0529262	2	1234.6	0.778822	35.201	0
	High	WGTLTDcVVmR	3	2	1	P51991-2	C7(Carbamidomethyl); M10(Oxidation)	0	1.22837e+06	0.884715	2	6.0266	0	0.000111	31.52	0.165462	2	1353.63	0.657574	36.4605	0
	High	IETIEVmEDr	1	2	1	P51991-2	M7(Oxidation); R10(Arg10)	0	2.04528e+06	0.826905	1		0	8.141e-06	28.82	0.269001	2	1260.6	0.270513	28.0866	0
	High	EDSVKPGAHLTVK	1	2	1	P51991-2		0	3.0798e+06	0.835675	1		0.004	0.04239	15.66	6.64441	3	1380.75	0.605678	21.4967	0
P07910-4	Isoform 4 of Heterogeneous nuclear ribonucleoproteins C1/C2 OS=Homo sapiens GN=HNRNPC - [HNRPC_HUMAN]	826.733	48.4	6	11	11	45	9.75324e+06	0.850299	25	21.1448	250	27.8045	4.69092
	A2	Sequence	# PSMs	# Proteins	# Protein Groups	Protein Group Accessions	Modifications	ΔCn	Area	Heavy/Light	Heavy/Light Count	Heavy/Light Variability [%]	q-Value	PEP	IonScore	Exp Value	Charge	MH+ [Da]	ΔM [ppm]	RT [min]	# Missed Cleavages
	High	VFIGNLNTLVVk	3	6	1	P07910-4	K12(Lys8)	0	3.43008e+06	0.966095	1		0	3.479e-08	75.85	1.81491e-06	2	1324.81	0.82824	47.3436	0
	High	mESEGGADDsAEEGDLLDDDDNEDR	5	6	1	P07910-4	M1(Oxidation); S10(Phospho)	0	7.11171e+06	0.719829	3	12.5862	0	2.523e-13	66.64	2.92532e-05	2	2794.97	1.43161	34.0087	0
	High	VFIGNLNTLVVK	3	6	1	P07910-4		0	3.73387e+06	1.02376	2	0.442617	0	1.052e-11	66.36	1.88433e-05	2	1316.79	0.306564	47.3631	0
	High	mESEGGADDsAEEGDLLDDDDNEDr	5	6	1	P07910-4	M1(Oxidation); S10(Phospho); R25(Arg10)	0	4.26918e+06	0.757631	1		0	7.72e-10	65.49	3.97602e-05	2	2804.97	0.828568	34.0604	0
	High	GFAFVQYVNEr	3	6	1	P07910-4	R11(Arg10)	0	1.97963e+06	1.00187	2	24.6839	0	6.369e-07	63.24	0.000114933	2	1339.67	1.63076	44.1065	0
	High	mIAGQVLDINLAAEPk	3	6	1	P07910-4	M1(Oxidation); K16(Lys8)	0	3.09322e+06	0.818951	2	9.18581	0	2.983e-15	61.36	0.000208228	2	1706.93	0.911151	45.3255	0
	High	GFAFVQYVNER	3	6	1	P07910-4		0	2.36572e+06	0.956888	1		0	1.028e-07	54.55	0.000792875	2	1329.66	1.61913	44.2683	0
	High	mIAGQVLDINLAAEPK	4	6	1	P07910-4	M1(Oxidation)	0	3.94511e+06	0.803723	1		0	7.018e-18	53.17	0.00156175	2	1698.91	0.507201	44.9045	0
	High	mESEGGADDsAEEGDLLDDDDNEDRGDDQLELIK	2	6	1	P07910-4	M1(Oxidation); S10(Phospho)	0	8.10743e+06	1.00094	1		0	0.0007708	36.78	0.145016	3	3806.49	1.27546	45.3126	1
	High	mESEGGADDsAEEGDLLDDDDNEDRGDDQLELIKDDEK	1	6	1	P07910-4	M1(Oxidation); S10(Phospho)	0	1.21232e+07	0.738429	1		0	0.0001435	34.54	0.255954	3	4293.69	2.70798	42.4599	2
	High	mEsEGGADDSAEEGDLLDDDDNEDrGDDQLELIkDDEk	2	6	1	P07910-4	M1(Oxidation); S3(Phospho); R25(Arg10); K34(Lys8); K38(Lys8)	0	4.6064e+06	0.802315	2	3.28731	0	0.00103	30.74	0.680065	3	4319.72	2.22889	42.8331	2
	High	mESEGGADDsAEEGDLLDDDDNEDrGDDQLELIk	4	6	1	P07910-4	M1(Oxidation); S10(Phospho); R25(Arg10); K34(Lys8)	0	5.33493e+06	0.780948	2	13.4794	0	1.805e-06	30.52	0.680049	3	3824.52	3.24651	45.3829	1
	High	NDKSEEEQSSSSVK	1	6	1	P07910-4		0	878238	1.11764	1		0.001	0.008186	13.42	11.2132	2	1553.69	1.37636	12.855	1
	High	QkVDSLLENLEk	1	6	1	P07910-4	K2(Lys8); K12(Lys8)	0	1.61696e+06	2.61674	1		0.003	0.02463	26.66	0.409324	2	1431.81	1.90255	39.1788	1
	High	SDVEAIFSK	1	6	1	P07910-4		0	880360	0.92512	1		0.004	0.03407	13.83	6.14997	2	995.505	0.11341	34.9141	0
	High	VDSLLENLEk	1	6	1	P07910-4	K10(Lys8)	0	145068	0.387855	1		0.007	0.05512	26.68	0.378555	2	1167.63	-1.93247	41.055	0
	High	VPPPPPIAR	1	6	1	P07910-4		0	9.02911e+06				0.007	0.05994	22.2	0.596835	2	943.572	-0.0498543	26.265	0
	High	VPPPPPIAr	2	6	1	P07910-4	R9(Arg10)	0	3.5973e+06	0.420218	2	1.39804	0.008	0.06519	32.26	0.0658773	2	953.581	0.11201	26.8307	0
P62805	Histone H4 OS=Homo sapiens GN=HIST1H4A PE=1 SV=2 - [H4_HUMAN]	647.07	50.49	1	5	5	35	1.42427e+07	0.996446	17	11.7595	103	11.3604	11.356
	A2	Sequence	# PSMs	# Proteins	# Protein Groups	Protein Group Accessions	Modifications	ΔCn	Area	Heavy/Light	Heavy/Light Count	Heavy/Light Variability [%]	q-Value	PEP	IonScore	Exp Value	Charge	MH+ [Da]	ΔM [ppm]	RT [min]	# Missed Cleavages
	High	TVTAmDVVYALK	4	1	1	P62805	M5(Oxidation)	0	3.55504e+06	1.01221	1		0	1.054e-09	71.03	1.88538e-05	2	1326.7	0.742864	41.6492	0
	High	VFLENVIr	3	1	1	P62805	R8(Arg10)	0	1.33916e+07	1.13863	3	4.55282	0	3.987e-05	64.9	3.86371e-05	2	999.586	0.00790749	41.3054	0
	High	ISGLIYEETr	4	1	1	P62805	R10(Arg10)	0	1.30083e+07	1.0011	1		0	1.018e-09	62.31	0.000113415	2	1190.63	0.458556	33.7332	0
	High	VFLENVIR	3	1	1	P62805		0	1.30679e+07				0	1.336e-05	61.83	7.45709e-05	2	989.578	0.160905	41.3107	0
	High	ISGLIYEETR	3	1	1	P62805		0	1.44378e+07	1.01073	2	2.11017	0	2.91e-09	61.73	0.000131533	2	1180.62	0.642314	33.7386	0
	High	TVTAmDVVYALk	3	1	1	P62805	M5(Oxidation); K12(Lys8)	0	2.89432e+06	0.921044	2	2.67021	0	8.509e-13	57.79	0.000388656	2	1334.71	0.709301	42.1665	0
	High	DNIQGITKPAIR	6	1	1	P62805		0	1.48987e+07	0.901567	4	1.06625	0	9.569e-09	50.49	0.00155122	2	1325.75	0.327828	29.292	0
	High	DNIQGITkPAIr	6	1	1	P62805	K8(Lys8); R12(Arg10)	0	1.1945e+07	0.902698	2	2.93056	0	3.449e-06	47.04	0.00291801	2	1343.78	1.13575	28.6302	0
	High	DAVTYTEHAk	2	1	1	P62805	K10(Lys8)	0	5.71262e+06	1.05001	2	0.162409	0.001	0.01122	11.17	13.4855	2	1142.56	-0.320524	18.7005	0
	High	DAVTYTEHAK	1	1	1	P62805		0	5.97422e+06				0.003	0.02152	14.85	5.59753	2	1134.54	0.141826	18.2325	0
P09651-3	Isoform 2 of Heterogeneous nuclear ribonucleoprotein A1 OS=Homo sapiens GN=HNRNPA1 - [ROA1_HUMAN]	602.173	43.07	4	8	8	40	2.27993e+07	0.895925	23	18.9298	267	29.3682	9.14404
	A2	Sequence	# PSMs	# Proteins	# Protein Groups	Protein Group Accessions	Modifications	ΔCn	Area	Heavy/Light	Heavy/Light Count	Heavy/Light Variability [%]	q-Value	PEP	IonScore	Exp Value	Charge	MH+ [Da]	ΔM [ppm]	RT [min]	# Missed Cleavages
	High	NQGGYGGSSSSSSYGSGR	4	4	1	P09651-3		0	3.9765e+07	1.10063	1		0	3.28e-19	122.17	1.31874e-10	2	1694.7	0.852294	18.0505	0
	High	NQGGYGGSSSSSSYGSGr	3	4	1	P09651-3	R18(Arg10)	0	3.7766e+07	1.09673	2	5.41878	0	3.386e-19	87.41	3.99413e-07	2	1704.71	1.08076	18.0443	0
	High	SSGPYGGGGQYFAKPR	5	4	1	P09651-3		0	6.30582e+06	0.801809	2	0.140895	0	1.183e-14	81.45	2.53658e-06	2	1628.78	1.2879	28.7556	0
	High	IEVIEImTDr	3	4	1	P09651-3	M7(Oxidation); R10(Arg10)	0	2.58755e+06	0.91581	2	5.17831	0	6.286e-08	72.96	1.11484e-05	2	1244.64	0.791606	35.8092	0
	High	IEVIEImTDR	3	4	1	P09651-3	M7(Oxidation)	0	3.25087e+06	0.982742	1		0	4.64e-08	55.34	0.000646238	2	1234.64	1.0689	35.8037	0
	High	LFIGGLSFETTDESLr	2	4	1	P09651-3	R16(Arg10)	0	504671	0.947004	1		0	3.579e-13	47.54	0.00673603	2	1794.92	1.96235	52.7637	0
	High	SSGPYGGGGQYFAkPr	5	4	1	P09651-3	K14(Lys8); R16(Arg10)	0	4.68638e+06	0.788957	4	3.4243	0	3.416e-05	37.43	0.0694768	3	1646.8	-0.480602	28.0305	0
	High	LFIGGLSFETTDESLR	2	4	1	P09651-3		0	488260	1.73001	1		0	1.683e-09	32.72	0.220294	2	1784.9	-1.25879	53.1131	0
	High	SEsPKEPEQLR	1	4	1	P09651-3	S3(Phospho)	0	7.64491e+06	0.801075	1		0	0.003828	28.47	0.288306	3	1379.62	-0.00606853	21.7614	1
	High	SHFEQWGTLTDcVVmR	3	4	1	P09651-3	C12(Carbamidomethyl); M15(Oxidation)	0	1.47215e+06	1.07585	3	10.414	0	1.648e-08	28.43	0.628673	3	1981.89	1.40665	41.5014	0
	High	SEsPkEPEQLr	3	4	1	P09651-3	S3(Phospho); K5(Lys8); R11(Arg10)	0	22327090	0.741167	2	0.595518	0	0.00334	23.48	1.02314	2	1397.64	0.937483	21.4101	1
	High	GFAFVTFDDHDSVDK	2	4	1	P09651-3		0	960067	1.02587	2	12.1801	0	9.222e-07	18.42	4.75595	2	1699.76	1.58819	43.4601	0
	High	GFAFVTFDDHDSVDk	2	4	1	P09651-3	K15(Lys8)	0	962024				0	0.0008723	13.23	16.4133	2	1707.78	0.914678	43.8862	0
	High	EDSQRPGAHLTVK	1	4	1	P09651-3		0	2.99278e+06	0.866826	1		0.005	0.04692	23.83	1.22751	2	1437.75	1.88398	19.0579	0
	High	SHFEQWGTLTDcVVmr	1	4	1	P09651-3	C12(Carbamidomethyl); M15(Oxidation); R16(Arg10)	0	1.37327e+06				0.007	0.06027	18.61	6.70012	3	1991.9	0.894634	41.4497	0
P11142	Heat shock cognate 71 kDa protein OS=Homo sapiens GN=HSPA8 PE=1 SV=1 - [HSP7C_HUMAN]	569.919	21.21	2	9	11	38	2.95224e+06	0.83473	23	16.7559	646	70.8542	5.51611
	A2	Sequence	# PSMs	# Proteins	# Protein Groups	Protein Group Accessions	Modifications	ΔCn	Area	Heavy/Light	Heavy/Light Count	Heavy/Light Variability [%]	q-Value	PEP	IonScore	Exp Value	Charge	MH+ [Da]	ΔM [ppm]	RT [min]	# Missed Cleavages
	High	IINEPTAAAIAYGLDK	3	3	2	P11021;P11142		0	1.7992e+06	0.762143	3	15.8853	0	7.037e-18	79.29	3.50338e-06	2	1659.9	1.18869	44.7642	0
	High	IINEPTAAAIAYGLDk	3	3	2	P11021;P11142	K16(Lys8)	0	1.41026e+06				0	2.945e-15	63.99	0.000113283	2	1667.91	0.72056	44.7703	0
	High	SQIHDIVLVGGSTr	3	2	1	P11142	R14(Arg10)	0	662659	0.971401	2	10.3148	0	8.258e-11	61.58	0.000163852	2	1491.82	0.0516057	33.1533	0
	High	TTPSYVAFTDTER	3	2	1	P11142		0	2.97909e+06	0.651215	2	8.21518	0	2.988e-08	60.41	0.000265604	2	1487.7	1.00496	35.1151	0
	High	VEIIANDQGNR	3	3	2	P11021;P11142		0	3.57107e+06	0.889564	1		0	1.584e-07	55.21	0.000681542	2	1228.63	0.594548	23.8073	0
	High	NSLESYAFNmK	2	2	1	P11142	M10(Oxidation)	0	931223	0.865083	2	5.67985	0	2.228e-06	51.32	0.00153558	2	1319.59	0.276933	35.0202	0
	High	SQIHDIVLVGGSTR	2	2	1	P11142		0	812426	0.83473	1		0	2.846e-07	47.86	0.00389644	2	1481.81	0.77192	33.7718	0
	High	NQVAmNPTNTVFDAK	4	2	1	P11142	M5(Oxidation)	0	2.30656e+06	0.916909	2	17.7543	0	1.428e-07	40.58	0.0311275	2	1665.79	1.19196	31.5738	0
	High	TTPSYVAFTDTEr	2	2	1	P11142	R13(Arg10)	0	1.30357e+06	0.695974	1		0	3.234e-07	39.8	0.0301416	2	1497.71	0.122918	35.73	0
	High	VEIIANDQGNr	3	3	2	P11021;P11142	R11(Arg10)	0	2.92334e+06	0.92464	2	3.78065	0	0.003527	36.56	0.0548358	2	1238.64	0.418298	23.7016	0
	High	NQVAmNPTNTVFDAk	3	2	1	P11142	M5(Oxidation); K15(Lys8)	0	2.09847e+06	0.74611	1		0	6.229e-12	33.04	0.183193	2	1673.81	0.433748	31.5827	0
	High	STAGDTHLGGEDFDNR	1	2	1	P11142		0	1.41022e+06	0.984874	1		0	0.001489	22.09	1.55647	3	1691.73	0.444662	25.8647	0
	High	TVTNAVVTVPAYFNDSQR	1	1	1	P11142		0	1.07993e+06	0.695938	1		0	0.0008289	16.3	10.7928	2	1982	0.553818	43.5726	0
	High	FEELNADLFR	1	2	1	P11142		0	405619	1.17754	1		0.001	0.007485	32.52	0.129192	2	1253.62	1.74888	45.2875	0
	High	DAGTIAGLNVLr	1	2	1	P11142	R12(Arg10)	0	915676	0.745329	1		0.001	0.007531	18.13	2.51181	2	1209.68	1.8697	42.5717	0
	High	IINEPTAAAIAYGLDKK	1	2	1	P11142		0	1.15748e+06	0.872372	1		0.003	0.02148	36.24	0.0545723	3	1787.99	0.413676	42.2138	1
	High	NSLESYAFNmk	1	2	1	P11142	M10(Oxidation); K11(Lys8)	0	563356	0.769135	1		0.003	0.02467	30.16	0.206115	2	1327.61	0.154055	34.5639	0
	High	STAGDTHLGGEDFDNr	1	2	1	P11142	R16(Arg10)	0	1.31636e+06				0.008	0.0731	13.24	11.996	3	1701.73	0.604189	25.895	0
P10809	60 kDa heat shock protein, mitochondrial OS=Homo sapiens GN=HSPD1 PE=1 SV=2 - [CH60_HUMAN]	559.82	22.34	1	11	11	38	3.56242e+06	1.00188	25	20.914	573	61.0164	5.87158
	A2	Sequence	# PSMs	# Proteins	# Protein Groups	Protein Group Accessions	Modifications	ΔCn	Area	Heavy/Light	Heavy/Light Count	Heavy/Light Variability [%]	q-Value	PEP	IonScore	Exp Value	Charge	MH+ [Da]	ΔM [ppm]	RT [min]	# Missed Cleavages
	High	LVQDVANNTNEEAGDGTTTATVLAR	5	1	1	P10809		0	4.21955e+06	1.01665	5	2.16977	0	1.9808e-23	100.73	6.17772e-08	2	2560.26	2.83396	35.0592	0
	High	LVQDVANNTNEEAGDGTTTATVLAr	7	1	1	P10809	R25(Arg10)	0	5.92351e+06	0.97402	1		0	3.272e-20	78.05	1.15415e-05	2	2570.26	1.88543	35.1086	0
	High	VGLQVVAVK	3	1	1	P10809		0	2.20084e+06	0.903666	3	6.9318	0	2.755e-08	59.05	5.66254e-05	2	912.588	-0.174545	32.7898	0
	High	VGLQVVAVk	3	1	1	P10809	K9(Lys8)	0	1.9269e+06				0	7.586e-07	44.19	0.001107	2	920.602	0.248875	32.7846	0
	High	TVIIEQSWGSPk	3	1	1	P10809	K12(Lys8)	0	1.36618e+06	0.876015	2	7.87565	0	0.0001919	37.97	0.0383889	2	1352.73	1.4274	36.0717	0
	High	VGGTSDVEVNEk	1	1	1	P10809	K12(Lys8)	0	1.64301e+06	1.02823	1		0	4.393e-06	35.77	0.0554331	2	1241.61	-0.5636	20.1067	0
	High	TVIIEQSWGSPK	2	1	1	P10809		0	1.39966e+06	0.748568	1		0	0.003514	31.82	0.155766	2	1344.72	-0.0784248	36.1921	0
	High	GYISPYFINTSk	3	1	1	P10809	K12(Lys8)	0	1.57674e+06	0.780384	3	7.43466	0	1.191e-06	31.16	0.194194	2	1397.72	1.42849	41.0309	0
	High	VGEVIVTk	1	1	1	P10809	K8(Lys8)	0	1.23269e+06	1.24511	1		0	0.003316	30.84	0.0603681	2	852.529	0.540412	23.1691	0
	High	VGEVIVTkDDAmLLk	1	1	1	P10809	K8(Lys8); M12(Oxidation); K15(Lys8)	0	622224	1.42406	1		0	6.634e-06	30.7	0.175845	3	1662.93	0.417918	36.3117	1
	High	VGEVIVTK	1	1	1	P10809		0	1.10003e+06				0	0.001609	29.88	0.0836291	2	844.514	0.446991	23.1404	0
	High	TLNDELEIIEGmK	1	1	1	P10809	M12(Oxidation)	0	716147	1.14608	1		0	0.0002191	20.9	2.63073	2	1520.75	1.48041	45.2929	0
	High	TLNDELEIIEGmk	1	1	1	P10809	M12(Oxidation); K13(Lys8)	0	644097	1.22864	1		0	0.0001454	18.09	5.30295	2	1528.76	-0.469133	45.6706	0
	High	LSDGVAVLk	1	1	1	P10809	K9(Lys8)	0	1.36339e+06	0.941186	1		0.001	0.01117	33.12	0.0366621	2	909.55	0.253918	29.6502	0
	High	LSDGVAVLK	1	1	1	P10809		0	1.79628e+06				0.001	0.009771	28.02	0.156893	2	901.535	0.0284561	29.6554	0
	High	NAGVEGSLIVEK	2	1	1	P10809		0	453772	1.95868	2	11.5995	0.001	0.008994	25.09	0.594859	2	1215.66	3.3098	31.3811	0
	High	VTDALNATR	2	1	1	P10809		0	2.5629e+06	0.923981	2	8.70677	0.003	0.01588	27.62	0.222973	2	960.511	0.170391	20.7337	0
P11388	DNA topoisomerase 2-alpha OS=Homo sapiens GN=TOP2A PE=1 SV=3 - [TOP2A_HUMAN]	499.339	8.03	4	7	10	49	1.8991e+07	1.04124	29	22.853	1531	174.276	8.71924
	A2	Sequence	# PSMs	# Proteins	# Protein Groups	Protein Group Accessions	Modifications	ΔCn	Area	Heavy/Light	Heavy/Light Count	Heavy/Light Variability [%]	q-Value	PEP	IonScore	Exp Value	Charge	MH+ [Da]	ΔM [ppm]	RT [min]	# Missed Cleavages
	High	TLAVSGLGVVGr	2	4	1	P11388	R12(Arg10)	0	406928	1.425	2	8.04501	0	1.431e-11	68.74	1.24638e-05	2	1138.68	0.0545055	38.1743	0
	High	NENTEGsPQEDGVELEGLk	7	4	1	P11388	S7(Phospho); K19(Lys8)	0	1.52581e+07	1.13045	4	5.21043	0	8.226e-11	56.08	0.00100097	2	2132.92	1.94546	36.8117	0
	High	VPDEEENEEsDNEKETEK	4	4	1	P11388	S10(Phospho)	0	2.59573e+07	0.899527	3	0.873066	0	7.073e-08	54.9	0.000710288	2	2229.86	1.50773	18.6394	1
	High	NENTEGsPQEDGVELEGLK	6	4	1	P11388	S7(Phospho)	0	1.43402e+07	1.23017	2	0.367128	0	9.765e-11	54.27	0.00141115	2	2124.9	1.3966	36.8206	0
	High	IKNENTEGsPQEDGVELEGLK	7	4	1	P11388	S9(Phospho)	0	1.49536e+07	1.13563	5	5.43092	0	6.403e-08	53.86	0.0026108	2	2366.08	1.32154	34.6979	1
	High	VPDEEENEEsDNEkETEk	3	4	1	P11388	S10(Phospho); K14(Lys8); K18(Lys8)	0	2.03805e+07	0.940344	1		0	0.004106	43.02	0.0130159	2	2245.89	1.67979	18.6457	1
	High	IkNENTEGsPQEDGVELEGLk	6	4	1	P11388	K2(Lys8); S9(Phospho); K21(Lys8)	0	1.57578e+07	1.15424	1		0	0.000256	38.92	0.0884808	2	2382.11	1.07505	34.7069	1
	High	ELILFSNSDNEr	1	6	2	P11388;Q02880-2	R12(Arg10)	0	519407	1.27918	1		0	0.0002035	29.88	0.31812	2	1446.71	2.07914	40.6172	0
	High	VPDEEENEEsDNEk	1	4	1	P11388	S10(Phospho); K14(Lys8)	0	4.83518e+06	0.931322	1		0	0.003147	26.21	0.244118	2	1750.64	0.820753	17.7538	0
	High	IFDEILVNAADNk	1	6	2	P11388;Q02880-2	K13(Lys8)	0	756760	1.51825	1		0	8.109e-05	25.54	0.801181	2	1469.77	0.893389	44.3677	0
	High	GSVPLsSSPPATHFPDETEITNPVPk	2	4	1	P11388	S6(Phospho); K26(Lys8)	0	4.71074e+06	0.365094	2	1.2102	0	0.0008086	23.31	4.0121	3	2792.33	2.41165	44.4401	0
	High	GSVPLSSsPPATHFPDETEITNPVPK	5	4	1	P11388	S8(Phospho)	0	9.85442e+06	0.0828353	3	437.238	0	3.951e-05	19.97	8.62437	2	2784.32	4.08144	44.1623	0
	High	IFDEILVNAADNK	1	6	2	P11388;Q02880-2		0	641367	0.877714	1		0	2.383e-06	14.73	10.097	2	1461.76	1.42591	44.7004	0
	High	EVTFVPGLYk	1	6	2	P11388;Q02880-2	K10(Lys8)	0	677197	0.805165	1		0.001	0.006471	16.66	3.6304	2	1160.64	0.238211	41.7337	0
	High	VPDEEENEEsDNEK	1	4	1	P11388	S10(Phospho)	0	5.7686e+06				0.003	0.01666	16.67	1.6824	2	1742.63	1.19706	17.657	0
	High	FLEEFITPIVK	1	4	1	P11388		0	446484	0.0466597	1		0.004	0.03135	18.11	2.52572	2	1335.76	1.71813	53.2907	0
P60709	Actin, cytoplasmic 1 OS=Homo sapiens GN=ACTB PE=1 SV=1 - [ACTB_HUMAN]	494.371	26.4	2	7	7	38	6.74823e+06	0.949664	21	20.4934	375	41.7097	5.47803
	A2	Sequence	# PSMs	# Proteins	# Protein Groups	Protein Group Accessions	Modifications	ΔCn	Area	Heavy/Light	Heavy/Light Count	Heavy/Light Variability [%]	q-Value	PEP	IonScore	Exp Value	Charge	MH+ [Da]	ΔM [ppm]	RT [min]	# Missed Cleavages
	High	DLYANTVLSGGTTmYPGIADR	4	2	1	P60709	M14(Oxidation)	0	1.32539e+06	0.89396	2	23.4998	0	4.53e-19	72.04	3.8048e-05	2	2231.07	2.85529	45.1394	0
	High	GYSFTTTAER	3	2	1	P60709		0	5.42933e+06	1.24411	1		0	1.288e-10	66.28	3.41953e-05	2	1132.53	0.164153	28.1678	0
	High	GYSFTTTAEr	3	2	1	P60709	R10(Arg10)	0	6.82534e+06	1.36758	2	2.33971	0	6.967e-07	55.02	0.000506158	2	1142.54	0.0836902	27.6195	0
	High	DLYANTVLSGGTTmYPGIADr	4	2	1	P60709	M14(Oxidation); R21(Arg10)	0	970715	1.18285	1		0	4.602e-11	51.74	0.00420654	2	2241.07	0.460069	45.0276	0
	High	AGFAGDDAPr	3	2	1	P60709	R10(Arg10)	0	2.88755e+06	0.86852	2	7.0496	0	2.172e-06	48.09	0.00158654	2	986.457	-0.0301407	21.4403	0
	High	QEYDESGPSIVHR	3	2	1	P60709		0	1.53451e+06	0.943683	2	14.983	0	3.861e-06	39.61	0.0293016	3	1516.7	0.395885	25.5797	0
	High	VAPEEHPVLLTEAPLNPk	4	2	1	P60709	K18(Lys8)	0	3.71416e+06	0.593376	3	15.5544	0	2.457e-06	31.71	0.169644	2	1962.08	1.34863	38.7679	0
	High	SYELPDGQVITIGNER	3	2	1	P60709		0	3.36559e+06	1.02676	2	5.19438	0	0.0003568	29.46	0.491915	2	1790.89	0.490573	45.3379	0
	High	AGFAGDDAPR	3	2	1	P60709		0	3.87375e+06	0.949664	1		0	0.000677	28.05	0.170384	2	976.448	-0.313027	21.8618	0
	High	SYELPDGQVITIGNEr	2	2	1	P60709	R16(Arg10)	0	3.07248e+06	1.01434	1		0	1.381e-06	20.62	3.76782	2	1800.9	1.52224	45.2341	0
	High	VAPEEHPVLLTEAPLNPK	3	2	1	P60709		0	9.54561e+06	0.579126	2	7.32926	0	1.034e-06	19.75	2.96538	2	1954.07	1.8738	38.686	0
	High	QEYDESGPSIVHr	2	2	1	P60709	R13(Arg10)	0	1.24237e+06	0.983767	1		0.001	0.007066	23.78	1.17137	2	1526.71	-0.796421	25.6042	0
	High	EITALAPSTmK	1	2	1	P60709	M10(Oxidation)	0	2.77075e+06	0.890062	1		0.001	0.009046	21.08	1.40876	2	1177.61	0.382833	26.8597	0
P68104	Elongation factor 1-alpha 1 OS=Homo sapiens GN=EEF1A1 PE=1 SV=1 - [EF1A1_HUMAN]	484.561	18.61	2	7	7	36	9.64503e+06	0.703139	20	7.92474	462	50.1091	9.01221
	A2	Sequence	# PSMs	# Proteins	# Protein Groups	Protein Group Accessions	Modifications	ΔCn	Area	Heavy/Light	Heavy/Light Count	Heavy/Light Variability [%]	q-Value	PEP	IonScore	Exp Value	Charge	MH+ [Da]	ΔM [ppm]	RT [min]	# Missed Cleavages
	High	IGGIGTVPVGr	3	2	1	P68104	R11(Arg10)	0	7.15743e+06	0.713315	3	2.89705	0	1.066e-13	94.19	3.69062e-08	2	1035.62	0.272024	31.7758	0
	High	IGGIGTVPVGR	3	2	1	P68104		0	1.05558e+07				0	2.002e-07	75.34	3.16247e-06	2	1025.61	0.600757	31.7705	0
	High	YYVTIIDAPGHR	6	2	1	P68104		0	2.44691e+06	0.697438	6	3.58099	0	2.796e-07	60.67	0.00024237	2	1404.73	0.982292	36.2998	0
	High	YYVTIIDAPGHr	4	2	1	P68104	R12(Arg10)	0	1.67778e+06				0	4.121e-05	49.07	0.0033751	2	1414.74	0.134959	35.7004	0
	High	LPLQDVYK	3	2	1	P68104		0	8930918	0.680684	1		0	1.668e-05	42.39	0.00787575	2	975.551	-0.103958	34.3643	0
	High	EHALLAYTLGVK	3	2	1	P68104		0	698957	0.929966	2	4.71808	0	7.191e-06	37.7	0.0322836	2	1314.74	0.993518	39.6963	0
	High	LPLQDVYk	3	2	1	P68104	K8(Lys8)	0	5.3091e+06	0.652135	2	1.89282	0	0.0007508	36.88	0.0278343	2	983.565	0.167672	33.9174	0
	High	QTVAVGVIK	1	2	1	P68104		0	3.83644e+06	0.856777	1		0	3.942e-05	23.46	0.379137	2	914.567	0.0797102	27.673	0
	High	VETGVLKPGmVVTFAPVNVTTEVK	4	2	1	P68104	M10(Oxidation)	0	9.44839e+06	0.690447	3	0.628886	0	7.417e-09	22.83	1.32592	3	2531.39	2.6709	46.7975	0
	High	EHALLAYTLGVk	1	2	1	P68104	K12(Lys8)	0	728922				0	0.003946	19.64	1.76653	2	1322.76	0.0352852	40.2094	0
	High	VETGVLkPGmVVTFAPVNVTTEVk	2	2	1	P68104	K7(Lys8); M10(Oxidation); K24(Lys8)	0	5.77034e+06				0.001	0.007613	11.71	13.3894	3	2547.41	0.898503	46.6648	0
	High	STTTGHLIYK	2	2	1	P68104		0	3.47886e+06	0.892871	2	6.04907	0.003	0.02946	24.73	0.594111	2	1120.6	0.378329	21.5647	0
	High	STTTGHLIYk	1	2	1	P68104	K10(Lys8)	0	3.02199e+06				0.003	0.02782	19.69	1.93264	2	1128.61	0.124906	21.5593	0
P68363-2	Isoform 2 of Tubulin alpha-1B chain OS=Homo sapiens GN=TUBA1B - [TBA1B_HUMAN]	464.54	30.15	4	6	6	33	2.84954e+06	0.987239	15	34.2	335	37.1941	4.98291
	A2	Sequence	# PSMs	# Proteins	# Protein Groups	Protein Group Accessions	Modifications	ΔCn	Area	Heavy/Light	Heavy/Light Count	Heavy/Light Variability [%]	q-Value	PEP	IonScore	Exp Value	Charge	MH+ [Da]	ΔM [ppm]	RT [min]	# Missed Cleavages
	High	TIGGGDDSFNTFFSETGAGK	4	4	1	P68363-2		0	1.49806e+06	1.32907	2	10.8536	0	2.888e-12	60.61	0.000373783	2	2007.9	1.87105	47.9305	0
	High	AVFVDLEPTVIDEVr	4	4	1	P68363-2	R15(Arg10)	0	1.70741e+06	0.987239	1		0	5.657e-08	58.32	0.000450822	2	1711.92	0.980646	52.2227	0
	High	TIGGGDDSFNTFFSETGAGk	4	4	1	P68363-2	K20(Lys8)	0	1.78706e+06	1.17672	1		0	2.775e-13	57.28	0.000851815	2	2015.91	2.32877	47.4423	0
	High	AVFVDLEPTVIDEVR	5	4	1	P68363-2		0	2.21816e+06	0.920864	2	7.47039	0	4.183e-08	46.42	0.007337	2	1701.91	1.32637	51.8948	0
	High	DVNAAIATIK	3	4	1	P68363-2		0	1.46574e+06	0.789844	3	15.1074	0	7.125e-05	39.29	0.0145905	2	1015.58	0.42401	33.1358	0
	High	VGINYQPPTVVPGGDLAk	3	4	1	P68363-2	K18(Lys8)	0	2.7472e+06	0.689278	2	1.1534	0	1.417e-11	36.92	0.0584404	2	1833	1.24955	41.9734	0
	High	AVcmLSNTTAIAEAWAR	2	4	1	P68363-2	C3(Carbamidomethyl); M4(Oxidation)	0	1.09128e+06	1.3233	2	17.5883	0	6.95e-13	36.86	0.0944284	2	1880.9	0.730573	45.6383	0
	High	VGINYQPPTVVPGGDLAK	3	4	1	P68363-2		0	4.31761e+06	0.693077	1		0	4.179e-09	36.04	0.0800043	2	1824.99	1.61076	41.9674	0
	High	DVNAAIATIk	2	4	1	P68363-2	K10(Lys8)	0	868806				0	0.001933	34.79	0.0363258	2	1023.59	0.44237	33.1125	0
	High	AVcmLSNTTAIAEAWAr	1	4	1	P68363-2	C3(Carbamidomethyl); M4(Oxidation); R17(Arg10)	0	1.57553e+06				0	1.044e-06	25.8	1.19967	2	1890.91	-0.741285	45.6135	0
	High	DYEEVGVDSVEGEGEEEGEEY	1	4	1	P68363-2		0	2.01284e+06				0.001	0.006889	13.43	12.211	2	2348.91	1.09285	41.2539	0
	High	TIGGGDDsFNTFFSETGAGk	1	4	1	P68363-2	S8(Phospho); K20(Lys8)	0	183985	2.13529	1		0.008	0.08231	10.66	28.515	2	2095.87	-0.158734	48.7836	0
P61978-3	Isoform 3 of Heterogeneous nuclear ribonucleoprotein K OS=Homo sapiens GN=HNRNPK - [HNRPK_HUMAN]	445.11	25.45	3	8	8	36	4.54766e+06	0.800391	20	17.018	440	48.5322	5.5415
	A2	Sequence	# PSMs	# Proteins	# Protein Groups	Protein Group Accessions	Modifications	ΔCn	Area	Heavy/Light	Heavy/Light Count	Heavy/Light Variability [%]	q-Value	PEP	IonScore	Exp Value	Charge	MH+ [Da]	ΔM [ppm]	RT [min]	# Missed Cleavages
	High	GSYGDLGGPIITTQVTIPK	3	3	1	P61978-3		0	4.95572e+06	0.753291	1		0	3.558e-12	57.42	0.0005703	2	1917.04	1.41821	46.7719	0
	High	GSYGDLGGPIITTQVTIPk	3	3	1	P61978-3	K19(Lys8)	0	3.35979e+06	0.695082	2	5.35747	0	3.422e-12	56.92	0.000586132	2	1925.05	1.13848	47.2025	0
	High	TDYNASVSVPDSSGPEr	2	3	1	P61978-3	R17(Arg10)	0	2.03737e+06	0.739717	2	6.55105	0	2.226e-12	50.47	0.00332497	2	1790.81	2.28294	29.7871	0
	High	IILDLISESPIk	3	3	1	P61978-3	K12(Lys8)	0	2.75738e+06	0.792289	3	3.0176	0	5.314e-10	45.15	0.0022805	2	1348.82	1.16638	52.702	0
	High	IDEPLEGSEDR	3	3	1	P61978-3		0	4.11552e+06	0.77912	2	10.5208	0	2.618e-08	44.96	0.00615169	2	1259.58	0.426987	25.72	0
	High	IILDLISESPIK	3	3	1	P61978-3		0	3.86697e+06				0	2.438e-05	44.7	0.00298183	2	1340.8	0.74711	52.6937	0
	High	IDEPLEGSEDr	3	3	1	P61978-3	R11(Arg10)	0	2.71968e+06	0.688223	1		0	7.204e-05	40.77	0.016135	2	1269.58	0.640953	25.7255	0
	High	TDYNASVSVPDSSGPER	3	3	1	P61978-3		0	4.14965e+06	0.738012	1		0	7.272e-10	40.24	0.0330331	2	1780.8	1.66099	29.6605	0
	High	IITITGTQDQIQNAQYLLQNSVK	6	3	1	P61978-3		0	4.5376e+06	1.1499	4	8.24295	0	1.282e-08	36.01	0.0842429	2	2589.39	1.27747	54.0945	0
	High	GSDFDcELr	1	3	1	P61978-3	C6(Carbamidomethyl); R9(Arg10)	0	1.11552e+06	1.03191	1		0	0.001732	34.3	0.0308746	2	1108.46	0.000403431	28.1729	0
	High	IITITGTQDQIQNAQYLLQNSVk	4	3	1	P61978-3	K23(Lys8)	0	4.44907e+06	1.06326	1		0	1.268e-11	31.72	0.198461	3	2597.41	2.45181	54.2866	0
	High	LFQEccPHSTDR	1	3	1	P61978-3	C5(Carbamidomethyl); C6(Carbamidomethyl)	0	550379	0.911294	1		0.001	0.01381	15.53	5.29007	3	1549.65	-0.0939167	23.2788	0
	High	DLAGSIIGK	1	3	1	P61978-3		0	1.34806e+06	0.831624	1		0.004	0.03142	11.97	6.70274	2	873.504	0.0167361	35.1231	0
E9PCY7	Heterogeneous nuclear ribonucleoprotein H OS=Homo sapiens GN=HNRNPH1 PE=1 SV=1 - [E9PCY7_HUMAN]	413.718	21.45	3	6	6	39	5.32327e+06	0.743123	21	15.1	429	47.0574	6.34131
	A2	Sequence	# PSMs	# Proteins	# Protein Groups	Protein Group Accessions	Modifications	ΔCn	Area	Heavy/Light	Heavy/Light Count	Heavy/Light Variability [%]	q-Value	PEP	IonScore	Exp Value	Charge	MH+ [Da]	ΔM [ppm]	RT [min]	# Missed Cleavages
	High	STGEAFVQFASQEIAEK	3	3	1	E9PCY7		0	3.73382e+06	1.00233	2	8.83178	0	1.091e-16	66.41	0.000104303	2	1841.9	2.90405	49.2149	0
	High	STGEAFVQFASQEIAEk	3	3	1	E9PCY7	K17(Lys8)	0	3.46059e+06	1.01173	1		0	3.921e-14	59.04	0.000598058	2	1849.91	1.88066	49.7183	0
	High	ATENDIYNFFSPLNPVr	3	3	1	E9PCY7	R17(Arg10)	0	791817	0.681788	2	5.53752	0	1.29e-05	43.51	0.0226327	2	2006.99	0.428968	57.2186	0
	High	HTGPNsPDTANDGFVr	6	3	1	E9PCY7	S6(Phospho); R16(Arg10)	0	8.76414e+06	0.743123	5	5.74827	0	1.719e-08	41.02	0.0192214	2	1774.75	1.95504	25.8904	0
	High	HTGPNsPDTANDGFVR	5	3	1	E9PCY7	S6(Phospho)	0	9.24847e+06	0.742992	1		0	0.0016	39.52	0.0277038	2	1764.74	1.87895	25.8773	0
	High	VHIEIGPDGr	3	3	1	E9PCY7	R10(Arg10)	0	1.75874e+06	0.839014	2	2.50648	0	0.0007601	37.73	0.028916	2	1102.59	0.0906903	28.0167	0
	High	GLPWScSADEVQR	3	3	1	E9PCY7	C6(Carbamidomethyl)	0	1.47131e+06	0.797467	3	10.5228	0	1.195e-09	36.52	0.0585298	2	1504.69	1.6284	36.1949	0
	High	ATENDIYNFFSPLNPVR	5	3	1	E9PCY7		0	1.0925e+06	0.654539	1		0	1.48e-08	34.33	0.189839	2	1996.98	4.20509	56.9695	0
	High	HTGPNSPDTANDGFVR	2	3	1	E9PCY7		0	1.64151e+06	0.68757	2	3.49654	0	2.517e-05	24.01	1.37528	2	1684.77	1.40179	24.4657	0
	High	GLPWScSADEVQr	2	3	1	E9PCY7	C6(Carbamidomethyl); R13(Arg10)	0	813681				0	1.459e-05	22.59	1.4489	2	1514.69	0.107397	36.189	0
	High	HTGPNSPDTANDGFVr	1	3	1	E9PCY7	R16(Arg10)	0	992563				0	1.01e-05	17.87	5.77039	2	1694.78	1.05213	24.503	0
	High	YGDGGSTFQSTTGHcVHmR	1	3	1	E9PCY7	C15(Carbamidomethyl); M18(Oxidation)	0	909257	1.07824	1		0	5.168e-07	14.61	11.6962	3	2113.88	0.627448	23.4855	0
	High	VHIEIGPDGR	2	3	1	E9PCY7		0	2.98752e+06	0.654105	1		0.001	0.00723	40.57	0.0149397	2	1092.58	-0.0492939	27.3497	0
Q00839-2	Isoform Short of Heterogeneous nuclear ribonucleoprotein U OS=Homo sapiens GN=HNRNPU - [HNRPU_HUMAN]	394.35	13.4	2	8	8	32	4.556e+06	0.900688	21	20.6691	806	88.9242	5.78271
	A2	Sequence	# PSMs	# Proteins	# Protein Groups	Protein Group Accessions	Modifications	ΔCn	Area	Heavy/Light	Heavy/Light Count	Heavy/Light Variability [%]	q-Value	PEP	IonScore	Exp Value	Charge	MH+ [Da]	ΔM [ppm]	RT [min]	# Missed Cleavages
	High	NFILDQTNVSAAAQR	6	2	1	Q00839-2		0	5.4334e+06	0.905668	5	15.3259	0	1.882e-17	108.89	4.63548e-09	2	1647.85	1.57811	38.4884	0
	High	NFILDQTNVSAAAQr	3	2	1	Q00839-2	R15(Arg10)	0	4.42877e+06	0.979682	1		0	3.783e-12	77.21	6.76784e-06	2	1657.85	0.409647	38.4715	0
	High	YNILGTNTImDK	3	2	1	Q00839-2	M10(Oxidation)	0	2.01155e+06	1.03392	3	6.12272	0	2.18e-07	53.62	0.00117709	2	1398.69	-0.341467	36.8488	0
	High	YNILGTNTImDk	2	2	1	Q00839-2	M10(Oxidation); K12(Lys8)	0	1.95932e+06				0	5.006e-08	33.31	0.128285	2	1406.71	1.10808	36.4086	0
	High	DIDIHEVR	3	2	1	Q00839-2		0	1.4979e+06	0.94945	3	7.82879	0	0.000308	33.09	0.0651926	2	996.51	-0.448254	26.0026	0
	High	SSGPTSLFAVTVAPPGAR	2	2	1	Q00839-2		0	5.42194e+06	0.676272	1		0	0.0003805	28.66	0.462619	2	1714.92	1.59504	46.3289	0
	High	DLPEHAVLK	1	2	1	Q00839-2		0	1.94649e+06	0.77588	1		0	0.002812	26.94	0.298496	2	1021.57	-0.225001	27.0874	0
	High	SSGPTSLFAVTVAPPGAr	2	2	1	Q00839-2	R18(Arg10)	0	3.27162e+06	0.622916	1		0	3.107e-07	25.1	0.96649	2	1724.92	2.24113	46.341	0
	High	LQAALDDEEAGGRPAmEPGNGSLDLGGDSAGR	2	2	1	Q00839-2	M16(Oxidation)	0	1.82534e+06	0.12997	2	1035.85	0	9.16e-09	22.02	6.45173	3	3142.43	-0.568348	36.2007	0
	High	LQAALDDEEAGGrPAmEPGNGSLDLGGDSAGr	1	2	1	Q00839-2	R13(Arg10); M16(Oxidation); R32(Arg10)	0	422476				0	1.964e-05	10.98	81.9421	3	3162.45	0.999344	36.2964	0
	High	LNTLLQr	2	2	1	Q00839-2	R7(Arg10)	0	2.56664e+06	1.09157	2	10.9724	0.001	0.01146	36.47	0.0197021	2	867.529	0.260386	27.9511	0
	High	FIEIAAr	2	2	1	Q00839-2	R7(Arg10)	0	1.50241e+06	0.470014	2	0.816506	0.001	0.007886	26.22	0.240572	2	829.481	0.0833705	30.9309	0
	High	DLPEHAVLk	1	2	1	Q00839-2	K9(Lys8)	0	1.33702e+06				0.003	0.02129	17.18	2.74026	2	1029.58	-0.0831327	27.1305	0
	High	LNTLLQR	1	2	1	Q00839-2		0	2812646				0.008	0.07252	13.23	4.52519	2	857.52	-0.0583419	27.9459	0
	High	DIDIHEVr	1	2	1	Q00839-2	R8(Arg10)	0	826408				0.008	0.06265	12	8.87757	2	1006.52	-0.472861	26.5819	0
M0QXS5	Heterogeneous nuclear ribonucleoprotein L (Fragment) OS=Homo sapiens GN=HNRNPL PE=1 SV=1 - [M0QXS5_HUMAN]	385.66	18.11	2	8	8	20	7.87544e+06	0.682136	13	30.2376	530	58.4353	6.78564
	A2	Sequence	# PSMs	# Proteins	# Protein Groups	Protein Group Accessions	Modifications	ΔCn	Area	Heavy/Light	Heavy/Light Count	Heavy/Light Variability [%]	q-Value	PEP	IonScore	Exp Value	Charge	MH+ [Da]	ΔM [ppm]	RT [min]	# Missed Cleavages
	High	NDQDTWDYTNPNLSGQGDPGSNPNKR	5	2	1	M0QXS5		0	1.89415e+07	0.682136	3	0.698249	0	2.358e-21	96.01	2.06528e-07	3	2890.27	1.8064	33.5925	1
	High	NDQDTWDYTNPNLSGQGDPGSNPNkr	4	2	1	M0QXS5	K25(Lys8); R26(Arg10)	0	1.1477e+07	0.616513	1		0	2.058e-12	74.47	3.09595e-05	3	2908.29	1.7508	33.5987	1
	High	LcFSTAQHAS	2	2	1	M0QXS5	C2(Carbamidomethyl)	0	2.87386e+06				0	0.0001693	38.38	0.0204312	2	1121.5	0.205947	25.9911	0
	High	TPASPVVHIR	3	2	1	M0QXS5		0	1.79012e+06	0.744335	3	22.1579	0	2.973e-06	30.91	0.102019	3	1076.62	-0.361881	25.2351	0
	High	NDQDTWDYTNPNLSGQGDPGSNPNK	1	2	1	M0QXS5		0	908519	0.558762	1		0	1.153e-07	28.44	0.940518	2	2734.17	3.53845	35.5367	0
	High	AITHLNNNFmFGQK	2	2	1	M0QXS5	M10(Oxidation)	0	1.81093e+06	1.29558	2	12.2092	0	0.0002535	21.06	2.77765	3	1650.81	0.371516	34.7251	0
	High	SKPGAAmVEmADGYAVDR	1	2	1	M0QXS5	M7(Oxidation); M10(Oxidation)	0	1.12348e+06	0.0249522	1		0.001	0.008959	17.12	8.08282	3	1899.86	-0.193898	27.2533	0
	High	LNVcVSk	1	2	1	M0QXS5	C4(Carbamidomethyl); K7(Lys8)	0	1.07256e+06	1.3721	1		0.003	0.02198	25.27	0.354966	2	827.455	1.25941	22.7042	0
	High	NPNGPYPYTLK	1	2	1	M0QXS5		0	1.43072e+06	0.577006	1		0.007	0.05795	15.04	7.47132	2	1263.64	-0.638929	31.3079	0
E9PK09	Bcl-2-associated transcription factor 1 (Fragment) OS=Homo sapiens GN=BCLAF1 PE=1 SV=4 - [E9PK09_HUMAN]	367.012	6.34	7	4	4	21	1.7399e+07	0.643988	12	37.3475	725	83.0857	10.1401
	A2	Sequence	# PSMs	# Proteins	# Protein Groups	Protein Group Accessions	Modifications	ΔCn	Area	Heavy/Light	Heavy/Light Count	Heavy/Light Variability [%]	q-Value	PEP	IonScore	Exp Value	Charge	MH+ [Da]	ΔM [ppm]	RT [min]	# Missed Cleavages
	High	FNDsEGDDTEETEDYR	3	7	1	E9PK09	S4(Phospho)	0	1.02305e+07	0.852058	2	1.90982	0	1.302e-18	80.74	6.82679e-07	2	2001.69	1.4821	28.3618	0
	High	FNDsEGDDTEETEDYr	3	7	1	E9PK09	S4(Phospho); R16(Arg10)	0	7.74485e+06	0.848889	1		0	3.195e-15	70.61	7.1863e-06	2	2011.7	1.42984	28.3482	0
	High	QkFNDsEGDDTEETEDYr	2	7	1	E9PK09	K2(Lys8); S6(Phospho); R18(Arg10)	0	1.24328e+06	0.805876	2	9.88547	0	2.551e-05	42.86	0.0108775	2	2275.87	1.3068	25.7292	1
	High	QKFNDsEGDDTEETEDYR	4	7	1	E9PK09	S6(Phospho)	0	2.24602e+06	0.853957	1		0	0.0002116	28.58	0.253568	2	2257.84	1.75288	25.7137	1
	High	YSPSQNsPIHHIPSR	1	7	1	E9PK09	S7(Phospho)	0	2.51385e+06	0.542604	1		0	0.003382	20.52	3.25675	3	1799.82	0.831449	25.8276	0
	High	YsPSQNsPIHHIPSr	3	7	1	E9PK09	S2(Phospho); S7(Phospho); R15(Arg10)	0	1.5063e+07	0.495628	1		0	0.0008883	16.76	6.24892	3	1889.8	0.376961	27.8657	0
	High	YsPSQNsPIHHIPSR	3	7	1	E9PK09	S2(Phospho); S7(Phospho)	0	3.26799e+07	0.534549	3	4.23053	0.001	0.009251	34.46	0.100947	2	1879.79	0.986127	27.9088	0
	High	KAEGEPQEEsPLK	1	7	1	E9PK09	S10(Phospho)	0	9.28649e+06	0.549011	1		0.001	0.006449	31.33	0.166714	2	1521.69	1.17231	20.3374	1
	High	kAEGEPQEEsPLk	1	7	1	E9PK09	K1(Lys8); S10(Phospho); K13(Lys8)	0	4.56251e+06				0.001	0.014	29.32	0.307695	2	1537.71	0.712652	20.4243	1
Q9NTI5-2	Isoform 2 of Sister chromatid cohesion protein PDS5 homolog B OS=Homo sapiens GN=PDS5B - [PDS5B_HUMAN]	363.171	4.96	2	4	4	31	7.15524e+06	0.776847	18	12.6726	1391	158.18	8.5874
	A2	Sequence	# PSMs	# Proteins	# Protein Groups	Protein Group Accessions	Modifications	ΔCn	Area	Heavy/Light	Heavy/Light Count	Heavy/Light Variability [%]	q-Value	PEP	IonScore	Exp Value	Charge	MH+ [Da]	ΔM [ppm]	RT [min]	# Missed Cleavages
	High	AEsPESSAIESTQSTPQK	5	2	1	Q9NTI5-2	S3(Phospho)	0	9.96495e+06	0.960036	3	8.72656	0	2.469e-10	66.59	7.40839e-05	2	1956.85	1.41897	26.4777	0
	High	AEsPESSAIESTQSTPQk	3	2	1	Q9NTI5-2	S3(Phospho); K18(Lys8)	0	8.06432e+06	0.889021	2	1.68593	0	2.371e-11	56.7	0.000803874	2	1964.86	1.70405	26.9719	0
	High	mETVSNASSSSNPsSPGR	4	2	1	Q9NTI5-2	M1(Oxidation); S14(Phospho)	0	4.21482e+06	0.760192	2	3.70665	0	4.905e-13	55.85	0.000559164	2	1890.76	1.79733	18.6511	0
	High	LKEDILENEDEQNsPPK	2	2	1	Q9NTI5-2	S14(Phospho)	0	7.28596e+06	0.712405	2	7.33014	0	2.239e-05	46.84	0.00953404	2	2077.94	1.54303	31.4996	1
	High	AEsPESSAIESTQStPQK	3	2	1	Q9NTI5-2	S3(Phospho); T15(Phospho)	0	8.07955e+06	0.749723	1		0	4.83e-11	44.1	0.00869516	2	2036.81	0.932735	26.4837	0
	High	AEsPESSAIESTQStPQk	3	2	1	Q9NTI5-2	S3(Phospho); T15(Phospho); K18(Lys8)	0	5.98991e+06	0.811761	2	4.88371	0	1.215e-14	41.02	0.0206525	2	2044.83	2.04433	25.9277	0
	High	mETVSNASSSSNPSsPGr	2	2	1	Q9NTI5-2	M1(Oxidation); S15(Phospho); R18(Arg10)	0	2.40347e+06	0.73031	1		0	4.584e-09	29.53	0.254226	2	1900.77	1.74036	18.6942	0
	High	LkEDILENEDEQNsPPk	4	2	1	Q9NTI5-2	K2(Lys8); S14(Phospho); K17(Lys8)	0	4.58875e+06	0.707584	1		0	3.246e-05	19.88	5.23517	2	2093.96	0.794562	31.368	1
	High	METVSNASSSsNPSSPGR	1	2	1	Q9NTI5-2	S11(Phospho)	0	683429	0.774271	1		0	1.658e-05	15.14	7.17112	2	1874.76	-0.0532225	21.7176	0
	High	GHTAsESDEQQWPEEK	2	2	1	Q9NTI5-2	S5(Phospho)	0	2.07653e+06	0.621043	2	2.80771	0.001	0.006179	27.24	0.372878	2	1937.76	1.8001	25.1626	0
	High	GHTAsESDEQQWPEEk	1	2	1	Q9NTI5-2	S5(Phospho); K16(Lys8)	0	1.18284e+06				0.001	0.01146	12.99	10.1197	2	1945.77	-0.23484	24.6284	0
	High	mETVSNASSSsNPsSPGR	1	2	1	Q9NTI5-2	M1(Oxidation); S11(Phospho); S14(Phospho)	0	881602	0.811924	1		0.001	0.005982	10.09	11.5041	2	1970.72	0.969724	18.7363	0
P06733	Alpha-enolase OS=Homo sapiens GN=ENO1 PE=1 SV=2 - [ENOA_HUMAN]	343.228	23.73	1	7	7	36	1.77557e+06	0.754722	19	18.5086	434	47.1393	7.38623
	A2	Sequence	# PSMs	# Proteins	# Protein Groups	Protein Group Accessions	Modifications	ΔCn	Area	Heavy/Light	Heavy/Light Count	Heavy/Light Variability [%]	q-Value	PEP	IonScore	Exp Value	Charge	MH+ [Da]	ΔM [ppm]	RT [min]	# Missed Cleavages
	High	AAVPSGASTGIYEALELR	3	1	1	P06733		0	1.38088e+06	0.693776	2	12.5323	0	1.609e-13	60.58	0.000311713	2	1804.95	2.48906	48.5521	0
	High	VVIGmDVAASEFFR	3	1	1	P06733	M5(Oxidation)	0	1.338e+06	0.750132	3	29.5859	0	3.827e-10	46.6	0.00717914	2	1556.78	-0.050579	47.6516	0
	High	DATNVGDEGGFAPNILENK	2	1	1	P06733		0	1.41581e+06	0.861632	2	15.9244	0	2.886e-07	41.13	0.0394471	2	1960.93	1.90374	42.4212	0
	High	YISPDQLADLYk	3	1	1	P06733	K12(Lys8)	0	1.52056e+06	0.690607	1		0	2.04e-07	41.04	0.0228361	2	1433.74	0.440823	45.7016	0
	High	AAVPSGASTGIYEALELr	4	1	1	P06733	R18(Arg10)	0	890558	0.854177	1		0	1.608e-09	37.94	0.0572312	2	1814.96	1.48398	49.0613	0
	High	LAmQEFmILPVGAANFR	3	1	1	P06733	M3(Oxidation); M7(Oxidation)	0	1.28971e+06	0.551667	1		0	4.461e-11	37.6	0.0777058	2	1939.98	0.191353	51.0992	0
	High	LAmQEFmILPVGAANFr	3	1	1	P06733	M3(Oxidation); M7(Oxidation); R17(Arg10)	0	731717	0.817122	2	4.61766	0	9.578e-09	36.64	0.100007	2	1949.99	2.08468	51.522	0
	High	DATNVGDEGGFAPNILENk	3	1	1	P06733	K19(Lys8)	0	1.28778e+06	0.629543	1		0	5.659e-12	31.34	0.379083	2	1968.94	2.43424	42.8824	0
	High	VVIGmDVAASEFFr	3	1	1	P06733	M5(Oxidation); R14(Arg10)	0	857952				0	7.781e-07	30.74	0.282222	2	1566.79	-0.0299716	47.2791	0
	High	GNPTVEVDLFTSK	3	1	1	P06733		0	798852	0.750852	3	9.89671	0	3.633e-07	30.09	0.282191	2	1406.72	1.37622	41.8444	0
	High	YISPDQLADLYK	3	1	1	P06733		0	2.53004e+06	0.753873	2	22.9816	0	0.0001308	27.46	0.489693	2	1425.73	1.24112	46.0936	0
	High	GNPTVEVDLFTSk	1	1	1	P06733	K13(Lys8)	0	440033				0	4.915e-05	13.61	11.9526	2	1414.73	-0.212169	41.8625	0
	High	IGAEVYHNLK	1	1	1	P06733		0	1.16777e+06				0.001	0.00639	23.93	0.737946	2	1143.62	0.683251	25.854	0
	High	IGAEVYHNLk	1	1	1	P06733	K10(Lys8)	0	1.00644e+06	1.01057	1		0.003	0.01926	28.33	0.270209	2	1151.63	0.856762	25.8897	0
P08238	Heat shock protein HSP 90-beta OS=Homo sapiens GN=HSP90AB1 PE=1 SV=4 - [HS90B_HUMAN]	313.35	10.64	1	7	8	26	1.00518e+07	0.874809	18	8.92126	724	83.2121	5.03369
	A2	Sequence	# PSMs	# Proteins	# Protein Groups	Protein Group Accessions	Modifications	ΔCn	Area	Heavy/Light	Heavy/Light Count	Heavy/Light Variability [%]	q-Value	PEP	IonScore	Exp Value	Charge	MH+ [Da]	ΔM [ppm]	RT [min]	# Missed Cleavages
	High	IEDVGsDEEDDSGKDK	4	1	1	P08238	S6(Phospho)	0	1.64936e+07	0.874134	3	1.92738	0	4.238e-05	53.25	0.000664541	2	1817.7	1.44456	20.0701	1
	High	IEDVGsDEEDDSGk	3	1	1	P08238	S6(Phospho); K14(Lys8)	0	4.313e+06	0.868067	2	1.26169	0	1.688e-07	51.68	0.000703315	2	1582.59	1.30824	21.7833	0
	High	NPDDITQEEYGEFYK	1	1	1	P08238		0	691677	0.70237	1		0	5.103e-13	43.13	0.0154702	2	1847.8	0.514088	38.7467	0
	High	ADLINNLGTIAk	3	1	1	P08238	K12(Lys8)	0	1.67089e+06	0.86927	3	5.7416	0	0.0004775	39.22	0.0181486	2	1250.72	-0.553843	41.2427	0
	High	ADLINNLGTIAK	3	1	1	P08238		0	2.13575e+06				0	9.905e-06	37.77	0.0266288	2	1242.71	1.04551	41.316	0
	High	ELISNASDALDK	3	2	2	P08238;P14625		0	1.17793e+06	1.53504	3	21.0397	0	4.093e-05	37.36	0.0447381	2	1275.65	3.44219	32.5136	0
	High	IEDVGsDEEDDSGK	2	1	1	P08238	S6(Phospho)	0	5.95683e+06	0.821723	1		0	7.417e-06	26.22	0.201054	2	1574.58	1.02946	21.6253	0
	High	IEDVGsDEEDDSGkDk	2	1	1	P08238	S6(Phospho); K14(Lys8); K16(Lys8)	0	1.27659e+07				0.001	0.009025	28.96	0.226226	2	1833.73	0.790438	20.057	1
	High	EQVANSAFVER	2	1	1	P08238		0	1.17304e+06	0.981046	2	8.48221	0.001	0.01079	28.64	0.30644	2	1249.62	0.906222	26.5039	0
	High	EDQTEYLEEr	1	1	1	P08238	R10(Arg10)	0	673609	0.620557	1		0.002	0.01444	36.51	0.0400144	2	1321.58	2.17314	26.5746	0
	High	EDQTEYLEER	1	1	1	P08238		0	1.0069e+06	0.595274	1		0.005	0.04452	12.58	9.32735	2	1311.57	1.04864	27.2581	0
	High	IEDVGsDEEDDSGKDKK	1	1	1	P08238	S6(Phospho)	0	7.70504e+06	0.933462	1		0.008	0.06289	29.96	0.255038	2	1945.79	1.28708	17.7079	2
O43390-4	Isoform 4 of Heterogeneous nuclear ribonucleoprotein R OS=Homo sapiens GN=HNRNPR - [HNRPR_HUMAN]	277.72	8.6	3	4	4	14	1.59061e+06	1.06165	9	5.85946	535	59.9158	9.15869
	A2	Sequence	# PSMs	# Proteins	# Protein Groups	Protein Group Accessions	Modifications	ΔCn	Area	Heavy/Light	Heavy/Light Count	Heavy/Light Variability [%]	q-Value	PEP	IonScore	Exp Value	Charge	MH+ [Da]	ΔM [ppm]	RT [min]	# Missed Cleavages
	High	TGYTLDVTTGQr	3	3	1	O43390-4	R12(Arg10)	0	1.88527e+06	1.0409	2	2.92785	0	3.379e-10	79.44	2.73486e-06	2	1321.66	0.960492	31.0917	0
	High	NLATTVTEEILEK	3	3	1	O43390-4		0	960803	1.10017	3	0.990623	0	2.926e-10	56.59	0.000592606	2	1460.79	0.68088	52.7103	0
	High	TGYTLDVTTGQR	3	3	1	O43390-4		0	2.13695e+06	1.08373	1		0	2.46e-07	45.21	0.00689225	2	1311.66	0.943591	31.6133	0
	High	DLYEDELVPLFEK	4	3	1	O43390-4		0	554174	0.671892	2	24.0274	0	0.000238	35.75	0.094203	2	1609.8	0.958975	55.3028	0
	High	LFVGSIPK	1	3	1	O43390-4		0	1.67407e+06	0.920427	1		0	0.004595	16.59	1.89129	2	860.525	0.819892	35.2801	0
Q8IYB3-2	Isoform 2 of Serine/arginine repetitive matrix protein 1 OS=Homo sapiens GN=SRRM1 - [SRRM1_HUMAN]	255.521	7.21	3	5	5	18	9.18406e+06	0.641301	12	76.093	902	102.065	11.8101
	A2	Sequence	# PSMs	# Proteins	# Protein Groups	Protein Group Accessions	Modifications	ΔCn	Area	Heavy/Light	Heavy/Light Count	Heavy/Light Variability [%]	q-Value	PEP	IonScore	Exp Value	Charge	MH+ [Da]	ΔM [ppm]	RT [min]	# Missed Cleavages
	High	kETEsEAEDNLDDLEk	3	3	1	Q8IYB3-2	K1(Lys8); S5(Phospho); K16(Lys8)	0	4.42587e+06	1.11708	1		0	8.332e-09	65.83	8.43075e-05	2	1960.83	0.999157	33.5358	1
	High	KETEsEAEDNLDDLEK	3	3	1	Q8IYB3-2	S5(Phospho)	0	5.03388e+06	1.01168	2	2.41227	0	7.321e-07	49.76	0.00298921	2	1944.8	2.36545	33.3947	1
	High	KEtEsEAEDNLDDLEK	3	3	1	Q8IYB3-2	T3(Phospho); S5(Phospho)	0	1.63536e+06	0.642991	3	0.780352	0	2.711e-09	45.52	0.00486041	2	2024.77	2.20068	35.4374	1
	High	KPPAPPsPVQSQSPStNWSPAVPVK	4	3	1	Q8IYB3-2	S7(Phospho); T16(Phospho)	0	1.43742e+07	0.031086	2	398.792	0	1.204e-07	31.56	0.61441	3	2743.3	2.6912	38.958	0
	High	kEtEsEAEDNLDDLEk	1	3	1	Q8IYB3-2	K1(Lys8); T3(Phospho); S5(Phospho); K16(Lys8)	0	691525				0	0.0001626	23.26	0.888187	2	2040.79	0.17143	35.4638	1
	High	KPPAPPSPVQSQsPSTNWsPAVPVKK	2	3	1	Q8IYB3-2	S13(Phospho); S19(Phospho)	0	7.26247e+06	0.228486	2	3.90601	0.001	0.00862	10.75	73.479	3	2871.38	0.0631408	35.7372	1
	High	APQTSSsPPPVR	1	3	1	Q8IYB3-2	S7(Phospho)	0	5.91549e+06	0.503063	1		0.007	0.05675	22.27	1.2484	2	1303.6	0.493782	19.1422	0
	High	KAAsPsPQSVR	1	3	1	Q8IYB3-2	S4(Phospho); S6(Phospho)	0	5.30584e+06	0.728609	1		0.008	0.08252	10.64	13.0741	2	1287.55	1.15539	16.7975	1
O60814	Histone H2B type 1-K OS=Homo sapiens GN=HIST1H2BK PE=1 SV=3 - [H2B1K_HUMAN]	255.513	33.33	11	4	4	15	5.73788e+06	1.10071	9	7.91569	126	13.8816	10.3159
	A2	Sequence	# PSMs	# Proteins	# Protein Groups	Protein Group Accessions	Modifications	ΔCn	Area	Heavy/Light	Heavy/Light Count	Heavy/Light Variability [%]	q-Value	PEP	IonScore	Exp Value	Charge	MH+ [Da]	ΔM [ppm]	RT [min]	# Missed Cleavages
	High	AmGImNSFVNDIFEr	3	11	1	O60814	M2(Oxidation); M5(Oxidation); R15(Arg10)	0	4.87586e+06	1.10071	3	0.622324	0	3.103e-11	69.88	3.76254e-05	2	1785.82	1.81206	50.3902	0
	High	AmGImNSFVNDIFER	4	11	1	O60814	M2(Oxidation); M5(Oxidation)	0	4.90133e+06				0	9.018e-11	67.5	6.4187e-05	2	1775.81	1.18571	50.3816	0
	High	ESYSVYVYk	3	11	1	O60814	K9(Lys8)	0	2.8931e+06	1.16098	3	2.50858	0.001	0.01396	27.54	0.310108	2	1145.56	-0.424402	32.2663	0
	High	QVHPDTGISSk	2	11	1	O60814	K11(Lys8)	0	4.35339e+06	0.925602	2	2.37206	0.001	0.00921	26.12	0.54122	2	1176.61	0.303236	16.8093	0
	High	ESYSVYVYK	2	11	1	O60814		0	2.54582e+06				0.003	0.02294	10.7	14.6098	2	1137.55	-0.393245	32.2743	0
	High	EIQTAVR	1	11	1	O60814		0	7.95893e+06	0.984498	1		0.008	0.08297	12.64	5.26262	2	816.458	0.091609	18.8545	0
P11021	78 kDa glucose-regulated protein OS=Homo sapiens GN=HSPA5 PE=1 SV=2 - [GRP78_HUMAN]	253.721	13	1	4	6	19	2.1643e+06	0.797562	12	15.8413	654	72.2884	5.16064
	A2	Sequence	# PSMs	# Proteins	# Protein Groups	Protein Group Accessions	Modifications	ΔCn	Area	Heavy/Light	Heavy/Light Count	Heavy/Light Variability [%]	q-Value	PEP	IonScore	Exp Value	Charge	MH+ [Da]	ΔM [ppm]	RT [min]	# Missed Cleavages
	High	IINEPTAAAIAYGLDK	3	3	2	P11021;P11142		0	1.7992e+06	0.762143	3	15.8853	0	7.037e-18	79.29	3.50338e-06	2	1659.9	1.18869	44.7642	0
	High	IINEPTAAAIAYGLDk	3	3	2	P11021;P11142	K16(Lys8)	0	1.41026e+06				0	2.945e-15	63.99	0.000113283	2	1667.91	0.72056	44.7703	0
	High	VEIIANDQGNR	3	3	2	P11021;P11142		0	3.57107e+06	0.889564	1		0	1.584e-07	55.21	0.000681542	2	1228.63	0.594548	23.8073	0
	High	VEIIANDQGNr	3	3	2	P11021;P11142	R11(Arg10)	0	2.92334e+06	0.92464	2	3.78065	0	0.003527	36.56	0.0548358	2	1238.64	0.418298	23.7016	0
	High	DAGTIAGLNVmR	2	1	1	P11021	M11(Oxidation)	0	413866	0.797562	2	4.50789	0	0.0001104	31.23	0.168902	2	1233.63	1.56836	33.5429	0
	High	NQLTSNPENTVFDAK	2	1	1	P11021		0	1.12263e+06	0.665468	2	13.1247	0	1.531e-06	26.56	0.870064	2	1677.81	3.12112	35.0656	0
	High	SQIFSTASDNQPTVTIk	1	1	1	P11021	K17(Lys8)	0	690428	0.88427	1		0	6.922e-06	18.89	5.38374	2	1844.95	-0.66417	37.473	0
	High	NQLTSNPENTVFDAk	1	1	1	P11021	K15(Lys8)	0	615636				0	2.636e-09	16.38	8.56482	2	1685.82	0.114439	35.0899	0
	High	ITPSYVAFTPEGER	1	1	1	P11021		0	274665	0.64612	1		0.001	0.00559	15.91	8.81157	2	1566.78	-0.517601	38.8794	0
Q13283	Ras GTPase-activating protein-binding protein 1 OS=Homo sapiens GN=G3BP1 PE=1 SV=1 - [G3BP1_HUMAN]	252.737	9.66	1	2	2	16	6.15305e+06	0.594353	8	15.491	466	52.1321	5.51611
	A2	Sequence	# PSMs	# Proteins	# Protein Groups	Protein Group Accessions	Modifications	ΔCn	Area	Heavy/Light	Heavy/Light Count	Heavy/Light Variability [%]	q-Value	PEP	IonScore	Exp Value	Charge	MH+ [Da]	ΔM [ppm]	RT [min]	# Missed Cleavages
	High	SSsPAPADIAQTVQEDLR	6	1	1	Q13283	S3(Phospho)	0	9.81139e+06	0.594353	4	6.39737	0	1.339e-16	66.75	9.3691e-05	2	1964.9	0.923467	49.3309	0
	High	SSsPAPADIAQTVQEDLr	6	1	1	Q13283	S3(Phospho); R18(Arg10)	0	5.02066e+06				0	2.78e-12	54.15	0.00176297	2	1974.9	-0.548578	49.5275	0
	High	YQDEVFGGFVTEPQEEsEEEVEEPEER	4	1	1	Q13283	S17(Phospho)	0	2.49471e+06	0.445937	4	63.2294	0	3.842e-05	30.51	0.581849	3	3296.33	0.45223	48.1666	0
D6R9P3	Heterogeneous nuclear ribonucleoprotein A/B OS=Homo sapiens GN=HNRNPAB PE=1 SV=1 - [D6R9P3_HUMAN]	250.155	13.21	6	2	3	16	1.98288e+06	0.824139	8	12.4708	280	30.284	7.91357
	A2	Sequence	# PSMs	# Proteins	# Protein Groups	Protein Group Accessions	Modifications	ΔCn	Area	Heavy/Light	Heavy/Light Count	Heavy/Light Variability [%]	q-Value	PEP	IonScore	Exp Value	Charge	MH+ [Da]	ΔM [ppm]	RT [min]	# Missed Cleavages
	High	FGEVVDcTIK	3	6	2	D6R9P3;D6RAF8	C7(Carbamidomethyl)	0	1.75142e+06	0.92285	1		0	1.066e-06	61.25	0.000161415	2	1167.57	0.805084	32.6508	0
	High	IFVGGLNPEATEEK	3	6	1	D6R9P3		0	1.9467e+06	0.762685	3	0.886488	0	3.814e-10	57.42	0.000518858	2	1503.77	1.0947	37.2999	0
	High	FGEVVDcTIk	3	6	2	D6R9P3;D6RAF8	C7(Carbamidomethyl); K10(Lys8)	0	1.45467e+06	0.825026	2	16.442	0	0.0003207	56.31	0.000478292	2	1175.58	-1.10253	32.6253	0
	High	IFVGGLNPEATEEk	3	6	1	D6R9P3	K14(Lys8)	0	1.33625e+06				0	3.016e-07	37.64	0.0522071	2	1511.78	0.417239	37.2941	0
	High	EVYQQQQYGSGGR	2	6	1	D6R9P3		0	2.25052e+06	0.896453	1		0	0.001109	28.17	0.41759	2	1499.69	1.25045	21.0076	0
	High	EVYQQQQYGSGGr	2	6	1	D6R9P3	R13(Arg10)	0	1.78642e+06	0.881978	1		0.001	0.006101	31.64	0.196187	2	1509.7	1.58664	20.5361	0
Q9H6F5	Coiled-coil domain-containing protein 86 OS=Homo sapiens GN=CCDC86 PE=1 SV=1 - [CCD86_HUMAN]	233.763	12.78	1	2	2	14	1.80233e+07	0.328165	9	6.0269	360	40.2113	10.3306
	A2	Sequence	# PSMs	# Proteins	# Protein Groups	Protein Group Accessions	Modifications	ΔCn	Area	Heavy/Light	Heavy/Light Count	Heavy/Light Variability [%]	q-Value	PEP	IonScore	Exp Value	Charge	MH+ [Da]	ΔM [ppm]	RT [min]	# Missed Cleavages
	High	LQQGAGLESPQGQPEPGAAsPQr	5	1	1	Q9H6F5	S20(Phospho); R23(Arg10)	0	6.71329e+06	0.335151	2	2.2724	0	7.833e-16	69.52	8.06375e-05	2	2393.12	1.60172	28.5902	0
	High	LQQGAGLESPQGQPEPGAAsPQR	6	1	1	Q9H6F5	S20(Phospho)	0	3.16987e+07	0.334897	4	4.34352	0	4.832e-14	62.89	0.000357363	2	2383.11	1.59511	28.514	0
	High	ALVEFESNPEETREPGSPPsVQR	3	1	1	Q9H6F5	S20(Phospho)	0	4347985	0.250008	3	30.5122	0	5.902e-05	26.73	1.6125	3	2635.2	0.07562	37.9129	1
E7EUT5	Glyceraldehyde-3-phosphate dehydrogenase OS=Homo sapiens GN=GAPDH PE=1 SV=1 - [E7EUT5_HUMAN]	228.397	31.15	3	5	5	16	2.9692e+06	0.927625	10	32.8678	260	27.8531	6.94678
	A2	Sequence	# PSMs	# Proteins	# Protein Groups	Protein Group Accessions	Modifications	ΔCn	Area	Heavy/Light	Heavy/Light Count	Heavy/Light Variability [%]	q-Value	PEP	IonScore	Exp Value	Charge	MH+ [Da]	ΔM [ppm]	RT [min]	# Missed Cleavages
	High	VPTANVSVVDLTcr	3	3	1	E7EUT5	C13(Carbamidomethyl); R14(Arg10)	0	1.7627e+06	0.927625	2	13.3786	0	5.809e-09	66.84	6.56131e-05	2	1540.81	1.5765	38.9641	0
	High	VPTANVSVVDLTcR	3	3	1	E7EUT5	C13(Carbamidomethyl)	0	2.40701e+06	1.07138	1		0	1.143e-06	66.2	7.78661e-05	2	1530.8	1.32682	38.9133	0
	High	IISNAScTTNcLAPLAk	1	3	1	E7EUT5	C7(Carbamidomethyl); C11(Carbamidomethyl); K17(Lys8)	0	688126	0.708497	1		0	2.47e-09	34.84	0.140179	2	1841.94	0.794872	35.2916	0
	High	IISNAScTTNcLAPLAK	3	3	1	E7EUT5	C7(Carbamidomethyl); C11(Carbamidomethyl)	0	1.07916e+06	1.0676	2	4.86518	0	8.98e-08	25.28	1.30112	2	1833.92	0.0873396	35.318	0
	High	GALQNIIPASTGAAk	2	3	1	E7EUT5	K15(Lys8)	0	2.9972e+06	0.692597	2	4.96337	0	9.891e-05	22.1	1.09631	2	1419.81	1.01956	37.3385	0
	High	LISWYDNEFGYSNr	1	3	1	E7EUT5	R14(Arg10)	0	504114				0	4.736e-05	14.26	14.2359	2	1773.81	0.840612	46.7306	0
	High	GALQNIIPASTGAAK	1	3	1	E7EUT5		0	4.71848e+06				0.001	0.008807	20.36	1.84412	2	1411.79	0.966393	37.3058	0
	High	VIISAPSADAPmFVmGVNHEk	1	3	1	E7EUT5	M12(Oxidation); M15(Oxidation); K21(Lys8)	0	1.7821e+06	0.654444	1		0.003	0.02923	15.32	18.2002	3	2253.12	1.2271	39.2797	0
	High	LISWYDNEFGYSNR	1	3	1	E7EUT5		0	392924	1.28491	1		0.004	0.03439	14.79	11.7789	2	1763.81	3.45728	46.768	0
Q9UQE7	Structural maintenance of chromosomes protein 3 OS=Homo sapiens GN=SMC3 PE=1 SV=2 - [SMC3_HUMAN]	224.393	3.37	1	3	3	22	2.14383e+06	1.05931	8	17.0682	1217	141.454	7.18115
	A2	Sequence	# PSMs	# Proteins	# Protein Groups	Protein Group Accessions	Modifications	ΔCn	Area	Heavy/Light	Heavy/Light Count	Heavy/Light Variability [%]	q-Value	PEP	IonScore	Exp Value	Charge	MH+ [Da]	ΔM [ppm]	RT [min]	# Missed Cleavages
	High	KGDVEGsQSQDEGEGSGESER	4	1	1	Q9UQE7	S7(Phospho)	0	3.24472e+06	1.03105	2	10.2703	0	1.249e-11	58.39	0.000309892	2	2246.87	0.977638	16.0321	1
	High	kGDVEGSQsQDEGEGSGESEr	2	1	1	Q9UQE7	K1(Lys8); S9(Phospho); R21(Arg10)	0	2.80992e+06	1.00268	1		0	6.358e-07	42.49	0.0146518	2	2264.89	0.966741	16.4326	1
	High	GDVEGSQsQDEGEGSGESER	4	1	1	Q9UQE7	S8(Phospho)	0	1.16172e+06	0.952622	2	9.52613	0	7.152e-07	42.31	0.00704987	2	2118.78	1.03641	18.3074	0
	High	GDVEGSQsQDEGEGSGESEr	4	1	1	Q9UQE7	S8(Phospho); R20(Arg10)	0	1.19091e+06				0	0.002627	34.21	0.0539765	2	2128.79	1.96395	18.3684	0
	High	GSGsQSSVPSVDQFTGVGIR	4	1	1	Q9UQE7	S4(Phospho)	0	1.52119e+06	1.20935	1		0	0.003842	32.19	0.297143	2	2044.94	2.39218	44.4813	0
	High	GsGSQSSVPSVDQFTGVGIr	4	1	1	Q9UQE7	S2(Phospho); R20(Arg10)	0	1.99588e+06	1.29346	2	4.81682	0	2.923e-07	31.79	0.311871	2	2054.95	2.03958	44.9436	0
D6RAF8	Heterogeneous nuclear ribonucleoprotein D0 (Fragment) OS=Homo sapiens GN=HNRNPD PE=1 SV=1 - [D6RAF8_HUMAN]	222.705	19.91	3	3	3	13	6.62568e+06	0.94727	8	20.455	221	23.0622	5.10986
	A2	Sequence	# PSMs	# Proteins	# Protein Groups	Protein Group Accessions	Modifications	ΔCn	Area	Heavy/Light	Heavy/Light Count	Heavy/Light Variability [%]	q-Value	PEP	IonScore	Exp Value	Charge	MH+ [Da]	ΔM [ppm]	RT [min]	# Missed Cleavages
	High	IFVGGLSPDTPEEK	3	3	1	D6RAF8		0	5.17111e+06	0.719212	2	11.4779	0	3.862e-09	64.02	0.000122886	2	1488.76	1.12975	37.4009	0
	High	IFVGGLSPDTPEEk	3	3	1	D6RAF8	K14(Lys8)	0	3.45996e+06	0.775241	1		0	4.398e-10	52.4	0.00174358	2	1496.77	0.68997	36.9733	0
	High	mFIGGLSWDTTk	3	3	1	D6RAF8	M1(Oxidation); K12(Lys8)	0	484676	1.10431	2	19.7793	0	8.355e-06	33.4	0.126316	2	1379.68	4.33495	44.1493	0
	High	mFIGGLSWDTTK	1	3	1	D6RAF8	M1(Oxidation)	0	556549				0	4.905e-06	21.93	1.60014	2	1371.66	1.18481	43.7509	0
	High	IDASkNEEDEGHSNSsPr	2	3	1	D6RAF8	K5(Lys8); S16(Phospho); R18(Arg10)	0	1.41494e+07	0.978242	2	6.33336	0	0.004646	18.01	5.18807	2	2069.85	0.982497	14.521	1
	High	IDASKNEEDEGHSNsSPR	1	3	1	D6RAF8	S15(Phospho)	0	6.17891e+06	0.957271	1		0.008	0.07824	21.11	2.19831	2	2051.83	1.35153	14.074	1
H0Y6E7	RNA-binding motif protein, X chromosome, N-terminally processed (Fragment) OS=Homo sapiens GN=RBMX PE=1 SV=2 - [H0Y6E7_HUMAN]	190.233	13.7	3	3	3	18	1.46703e+06	0.913771	10	8.14804	292	31.8364	9.84717
	A2	Sequence	# PSMs	# Proteins	# Protein Groups	Protein Group Accessions	Modifications	ΔCn	Area	Heavy/Light	Heavy/Light Count	Heavy/Light Variability [%]	q-Value	PEP	IonScore	Exp Value	Charge	MH+ [Da]	ΔM [ppm]	RT [min]	# Missed Cleavages
	High	GFAFVTFESPADAK	3	3	1	H0Y6E7		0	1.43579e+06	0.830088	3	2.07092	0	9.453e-11	48.12	0.0043977	2	1486.72	-0.157639	47.7837	0
	High	LFIGGLNTETNEK	3	3	1	H0Y6E7		0	1.62797e+06	1.02101	2	7.97307	0	1.278e-08	47.05	0.00530779	2	1435.74	0.455863	38.0147	0
	High	LFIGGLNTETNEk	3	3	1	H0Y6E7	K13(Lys8)	0	1.49684e+06	0.954413	1		0	4.544e-12	46.77	0.00602627	2	1443.76	1.61013	38.5462	0
	High	GFAFVTFESPADAk	3	3	1	H0Y6E7	K14(Lys8)	0	1.05777e+06				0	3.145e-05	32.7	0.165809	2	1494.74	0.79722	47.796	0
	High	VEQATKPSFESGR	4	3	1	H0Y6E7		0	1.33734e+06	0.962987	3	6.67702	0	1.323e-05	31.59	0.194298	2	1435.72	0.628367	20.8754	0
	High	VEQATkPSFESGr	2	3	1	H0Y6E7	K6(Lys8); R13(Arg10)	0	1.15906e+06	0.871189	1		0	7.737e-06	30.19	0.286727	2	1453.74	1.03557	20.893	0
A0A087WU68	Polypyrimidine tract-binding protein 1 (Fragment) OS=Homo sapiens GN=PTBP1 PE=1 SV=1 - [A0A087WU68_HUMAN]	183.281	15.86	6	2	2	11	4.8691e+06	0.792913	4	0.980956	227	23.6201	7.89893
	A2	Sequence	# PSMs	# Proteins	# Protein Groups	Protein Group Accessions	Modifications	ΔCn	Area	Heavy/Light	Heavy/Light Count	Heavy/Light Variability [%]	q-Value	PEP	IonScore	Exp Value	Charge	MH+ [Da]	ΔM [ppm]	RT [min]	# Missed Cleavages
	High	NNQFQALLQYADPVSAQHAk	5	6	1	A0A087WU68	K20(Lys8)	0	6.51894e+06	0.791936	3	0.365655	0	3.48e-12	63.59	0.000257679	3	2251.14	0.183738	50.9001	0
	High	NNQFQALLQYADPVSAQHAK	5	6	1	A0A087WU68		0	9.05697e+06				0	2.105e-07	49.66	0.00664163	3	2243.12	-1.92067	50.4847	0
	High	LSLDGQNIYNAccTLr	1	6	1	A0A087WU68	C12(Carbamidomethyl); C13(Carbamidomethyl); R16(Arg10)	0	681230	1.47326	1		0	0.0002236	19.03	5.71868	2	1907.9	3.15943	41.7898	0
P07437	Tubulin beta chain OS=Homo sapiens GN=TUBB PE=1 SV=2 - [TBB5_HUMAN]	177.123	25.23	1	8	8	28	2.02437e+06	1.10755	20	26.2349	444	49.639	4.89404
	A2	Sequence	# PSMs	# Proteins	# Protein Groups	Protein Group Accessions	Modifications	ΔCn	Area	Heavy/Light	Heavy/Light Count	Heavy/Light Variability [%]	q-Value	PEP	IonScore	Exp Value	Charge	MH+ [Da]	ΔM [ppm]	RT [min]	# Missed Cleavages
	High	mAVTFIGNSTAIQELFk	3	1	1	P07437	M1(Oxidation); K17(Lys8)	0	654330	1.01295	3	2.7686	0	2.799e-07	45.39	0.0117391	2	1893.99	0.0659539	56.7494	0
	High	ImNTFSVVPSPK	3	1	1	P07437	M2(Oxidation)	0	1.70082e+06	0.886967	3	8.8405	0	6.71e-06	42.6	0.0125378	2	1335.7	-0.156424	36.0675	0
	High	EIVHIQAGQcGNQIGAK	4	1	1	P07437	C10(Carbamidomethyl)	0	1.26396e+06	1.39807	4	25.6042	0	2.786e-07	32.67	0.23923	3	1822.92	0.212659	28.975	0
	High	ISVYYNEATGGK	3	1	1	P07437		0	1.9882e+06	1.26207	3	2.80028	0	2.307e-08	32.32	0.13827	2	1301.64	0.760497	29.3662	0
	High	ALTVPELTQQVFDAK	2	1	1	P07437		0	1.49583e+06	0.902642	1		0	4.213e-05	31.91	0.189611	2	1659.9	1.55639	51.5185	0
	High	EIVHIQAGQcGNQIGAk	2	1	1	P07437	C10(Carbamidomethyl); K17(Lys8)	0	2.05925e+06				0	9.617e-13	29.33	0.507621	3	1830.94	0.590538	28.9689	0
	High	mAVTFIGNSTAIQELFK	1	1	1	P07437	M1(Oxidation)	0	477604				0	0.002663	26.56	0.850523	2	1885.98	3.32309	56.8124	0
	High	AILVDLEPGTmDSVr	3	1	1	P07437	M11(Oxidation); R15(Arg10)	0	1.38479e+06	0.754334	2	7.88644	0	6.364e-05	24.72	1.1262	2	1641.84	1.64525	41.5076	0
	High	ALTVPELTQQVFDAk	1	1	1	P07437	K15(Lys8)	0	1.26498e+06				0	0.001449	19.08	3.397	2	1667.91	1.74518	51.6082	0
	High	NSSYFVEWIPNNVK	2	1	1	P07437		0	344562	1.38593	2	19.755	0	3.303e-05	17.92	6.29035	2	1696.84	1.18293	49.7366	0
	High	AILVDLEPGTmDSVR	3	1	1	P07437	M11(Oxidation)	0	2.02566e+06	0.830372	1		0	0.0005641	11.27	25.3083	2	1631.83	0.813006	41.8151	0
	High	LAVNmVPFPR	1	1	1	P07437	M5(Oxidation)	0	618782	1.28622	1		0.003	0.02319	15.67	5.15343	2	1159.63	0.336289	39.5866	0
B4DLW8	Probable ATP-dependent RNA helicase DDX5 OS=Homo sapiens GN=DDX5 PE=1 SV=1 - [B4DLW8_HUMAN]	171.281	14.77	3	4	7	14	1.9727e+06	0.835238	11	12.0546	535	60.5254	9.0708
	A2	Sequence	# PSMs	# Proteins	# Protein Groups	Protein Group Accessions	Modifications	ΔCn	Area	Heavy/Light	Heavy/Light Count	Heavy/Light Variability [%]	q-Value	PEP	IonScore	Exp Value	Charge	MH+ [Da]	ΔM [ppm]	RT [min]	# Missed Cleavages
	High	APILIATDVASr	3	8	2	B4DLW8;Q92841-1	R12(Arg10)	0	3.18448e+06	0.828502	1		0	2.387e-11	65.52	3.71439e-05	2	1236.72	1.20486	37.2076	0
	High	APILIATDVASR	3	8	2	B4DLW8;Q92841-1		0	4.03778e+06	0.735461	2	6.85829	0	2.939e-12	59.76	0.000123331	2	1226.71	0.98976	37.2022	0
	High	LLQLVEDR	1	3	1	B4DLW8		0	834985	0.835238	1		0	0.002122	36.77	0.027549	2	985.57	2.12008	34.8648	0
	High	QVSDLISVLR	1	3	1	B4DLW8		0	586546	0.849671	1		0	0.0003777	30.49	0.111306	2	1129.66	0.250707	45.8625	0
	High	GDGPIcLVLAPTR	2	8	2	B4DLW8;Q92841-1	C6(Carbamidomethyl)	0	960412	0.636254	2	45.5109	0	0.0007075	29.38	0.302493	2	1368.73	0.654285	44.7893	0
	High	TGTAYTFFTPNNIk	1	3	1	B4DLW8	K14(Lys8)	0	362654	0.92323	1		0	0.0003366	17.36	6.46461	2	1582.8	1.81277	43.0736	0
	High	mLDmGFEPQIR	1	8	2	B4DLW8;Q92841-1	M1(Oxidation); M4(Oxidation)	0	919904	0.938279	1		0	0.002194	13.93	9.04834	2	1368.63	1.06183	35.1269	0
	High	TTYLVLDEADR	1	3	1	B4DLW8		0	376397	0.62486	1		0.001	0.009888	16.22	5.76179	2	1295.65	1.07762	37.3683	0
	High	mLDmGFEPQIr	1	8	2	B4DLW8;Q92841-1	M1(Oxidation); M4(Oxidation); R11(Arg10)	0	535712	0.864355	1		0.001	0.004906	16.02	5.48201	2	1378.64	0.0146444	35.7001	0
O14497-2	Isoform 2 of AT-rich interactive domain-containing protein 1A OS=Homo sapiens GN=ARID1A - [ARI1A_HUMAN]	160.92	4.64	3	5	5	17	4.3263e+06	0.566663	11	34.4665	2068	218.197	6.52197
	A2	Sequence	# PSMs	# Proteins	# Protein Groups	Protein Group Accessions	Modifications	ΔCn	Area	Heavy/Light	Heavy/Light Count	Heavy/Light Variability [%]	q-Value	PEP	IonScore	Exp Value	Charge	MH+ [Da]	ΔM [ppm]	RT [min]	# Missed Cleavages
	High	NPQmPQYSSPQPGSALsPR	4	3	1	O14497-2	M4(Oxidation); S17(Phospho)	0	2.16263e+06	0.381833	3	18.4342	0	1.554e-12	53.16	0.00223777	2	2137.94	2.04434	31.1842	0
	High	GPSPsPVGSPASVAQSR	3	3	1	O14497-2	S5(Phospho)	0	8.00337e+06	0.593527	3	1.51629	0	7.044e-09	49.2	0.00394162	2	1660.77	1.37743	28.8321	0
	High	SNsVGIQDAFNDGSDSTFQk	1	3	1	O14497-2	S3(Phospho); K20(Lys8)	0	802422	0.874834	1		0	1.66e-06	35.75	0.109223	2	2204.93	2.55102	41.5262	0
	High	GPsPSPVGSPASVAQSr	3	3	1	O14497-2	S3(Phospho); R17(Arg10)	0	4.27519e+06				0	7.105e-08	32.9	0.177527	2	1670.78	0.80371	28.8677	0
	High	sNSVGIQDAFNDGSDSTFQK	2	3	1	O14497-2	S1(Phospho)	0	1.01914e+06	1.12375	1		0	0.0005548	25.09	1.14388	2	2196.91	1.68898	41.5137	0
	High	GPSPsPVGsPASVAQSR	2	3	1	O14497-2	S5(Phospho); S9(Phospho)	0	2.84479e+06	0.456056	2	1.30961	0	0.0001933	25.08	0.74587	2	1740.74	1.65191	30.1292	0
	High	SHHAPmsPGSSGGGGQPLAR	1	2	1	O14497-2	M6(Oxidation); S7(Phospho)	0	2.81291e+06	0.593804	1		0	0.004468	16.22	8.38361	3	1983.85	0.563356	19.3285	0
	High	VSsPAPmEGGEEEEELLGPK	1	3	1	O14497-2	S3(Phospho); M7(Oxidation)	0	304766				0.001	0.005829	32.29	0.255469	2	2180.94	2.50601	37.2437	0
Q02880-2	Isoform Beta-1 of DNA topoisomerase 2-beta OS=Homo sapiens GN=TOP2B - [TOP2B_HUMAN]	158.82	10.18	2	10	13	42	1.46898e+07	0.809586	26	22.3849	1621	182.548	8.06006
	A2	Sequence	# PSMs	# Proteins	# Protein Groups	Protein Group Accessions	Modifications	ΔCn	Area	Heavy/Light	Heavy/Light Count	Heavy/Light Variability [%]	q-Value	PEP	IonScore	Exp Value	Charge	MH+ [Da]	ΔM [ppm]	RT [min]	# Missed Cleavages
	High	KTSFDQDsDVDIFPSDFPTEPPSLPR	4	2	1	Q02880-2	S8(Phospho)	0	9.66078e+06	0.41295	3	19.4715	0	0.001455	38.89	0.11905	2	3017.33	-4.47667	53.518	1
	High	FDsNEEDSASVFSPSFGLK	4	2	1	Q02880-2	S3(Phospho)	0	1.62682e+06	0.69741	3	4.677	0	2.799e-09	35.86	0.0865937	2	2142.89	1.25144	51.0421	0
	High	TSFDQDsDVDIFPSDFPTEPPSLPR	1	2	1	Q02880-2	S7(Phospho)	0	1.15087e+06	0.0966139	1		0	0.0003064	34.84	0.256866	2	2889.26	1.74661	56.5887	0
	High	FDsNEEDSASVFSPSFGLk	4	2	1	Q02880-2	S3(Phospho); K19(Lys8)	0	1.06467e+06				0	6.339e-06	31.05	0.278759	2	2150.91	1.34223	51.1053	0
	High	KVVEAVNsDsDSEFGIPK	3	2	1	Q02880-2	S8(Phospho); S10(Phospho)	0	4.91377e+06	0.938764	2	12.4999	0	1.373e-05	29.89	0.379748	2	2080.89	0.150778	38.8249	1
	High	ELILFSNSDNEr	1	6	2	P11388;Q02880-2	R12(Arg10)	0	519407	1.27918	1		0	0.0002035	29.88	0.31812	2	1446.71	2.07914	40.6172	0
	High	TsFDQDSDVDIFPSDFPTEPPSLPr	2	2	1	Q02880-2	S2(Phospho); R25(Arg10)	0	55248				0	0.0005112	26.93	1.56933	2	2899.26	0.99367	56.4422	0
	High	VVEAVNsDSDsEFGIPK	2	2	1	Q02880-2	S7(Phospho); S11(Phospho)	0	2.32327e+07	0.841443	2	4.91336	0	1.647e-08	25.84	0.672388	2	1952.79	1.16048	41.174	0
	High	IFDEILVNAADNk	1	6	2	P11388;Q02880-2	K13(Lys8)	0	756760	1.51825	1		0	8.109e-05	25.54	0.801181	2	1469.77	0.893389	44.3677	0
	High	SEDDSAKFDsNEEDSASVFSPSFGLK	4	2	1	Q02880-2	S10(Phospho)	0	3.31511e+06	0.820062	4	11.1244	0	6.923e-06	22.28	3.42337	3	2875.19	1.31486	47.8564	1
	High	kTsFDQDSDVDIFPSDFPTEPPSLPr	2	2	1	Q02880-2	K1(Lys8); S3(Phospho); R26(Arg10)	0	3.8385e+06	0.450895	1		0	0.0006186	20.28	9.17264	3	3035.37	2.07827	53.7324	1
	High	IFDEILVNAADNK	1	6	2	P11388;Q02880-2		0	641367	0.877714	1		0	2.383e-06	14.73	10.097	2	1461.76	1.42591	44.7004	0
	High	kVVEAVNsDsDSEFGIPk	3	2	1	Q02880-2	K1(Lys8); S8(Phospho); S10(Phospho); K18(Lys8)	0	4.3822e+06	0.835512	1		0	0.0001163	13.27	19.9741	2	2096.92	2.09186	38.8445	1
	High	VVEAVNsDsDSEFGIPk	2	2	1	Q02880-2	S7(Phospho); S9(Phospho); K17(Lys8)	0	1.70209e+07				0	0.0004992	12.72	14.6417	2	1960.81	0.700139	40.9158	0
	High	EVTFVPGLYk	1	6	2	P11388;Q02880-2	K10(Lys8)	0	677197	0.805165	1		0.001	0.006471	16.66	3.6304	2	1160.64	0.238211	41.7337	0
	High	ASPItNDGEDEFVPSDGLDKDEYTFsPGK	1	2	1	Q02880-2	T5(Phospho); S26(Phospho)	0	1.1176e+07	0.479318	1		0.001	0.01249	16.45	14.5379	3	3290.34	2.08493	47.1509	1
	High	SQDFGNLFSFPSySQKSEDDSAK	1	2	1	Q02880-2	Y13(Phospho)	0	631963	0.953734	1		0.002	0.01569	21.6	3.60202	3	2664.11	0.214606	51.498	1
	High	ASGsENEGDYNPGr	1	2	1	Q02880-2	S4(Phospho); R14(Arg10)	0	1.39743e+06	0.968145	1		0.003	0.0159	15.23	2.5223	2	1542.57	0.578889	19.488	0
	High	ASPITNDGEDEFVPsDGLDkDEyTFSPGk	1	2	1	Q02880-2	S15(Phospho); K20(Lys8); Y23(Phospho); K29(Lys8)	0	3.5115e+06				0.003	0.01876	12.76	38.2576	3	3306.37	1.16525	47.1572	1
	High	ASGsENEGDYNPGR	1	2	1	Q02880-2	S4(Phospho)	0	1.60379e+06				0.007	0.05433	11.04	6.87878	2	1532.56	0.00437502	19.6895	0
	High	KASGsENEGDYNPGR	1	2	1	Q02880-2	S5(Phospho)	0	2.82763e+06	0.764607	1		0.008	0.0824	22.73	0.759202	2	1660.66	1.10707	17.2221	1
	High	SQDFGNLFSFPSYsQkSEDDSAk	1	2	1	Q02880-2	S14(Phospho); K16(Lys8); K23(Lys8)	0	387068	0.840121	1		0.008	0.07698	13.58	26.6539	3	2680.14	0.525933	51.0603	1
Q92841-1	Isoform 2 of Probable ATP-dependent RNA helicase DDX17 OS=Homo sapiens GN=DDX17 - [DDX17_HUMAN]	153.637	9.38	5	2	5	12	1.9727e+06	0.849543	9	11.3419	650	72.326	8.5874
	A2	Sequence	# PSMs	# Proteins	# Protein Groups	Protein Group Accessions	Modifications	ΔCn	Area	Heavy/Light	Heavy/Light Count	Heavy/Light Variability [%]	q-Value	PEP	IonScore	Exp Value	Charge	MH+ [Da]	ΔM [ppm]	RT [min]	# Missed Cleavages
	High	APILIATDVASr	3	8	2	B4DLW8;Q92841-1	R12(Arg10)	0	3.18448e+06	0.828502	1		0	2.387e-11	65.52	3.71439e-05	2	1236.72	1.20486	37.2076	0
	High	APILIATDVASR	3	8	2	B4DLW8;Q92841-1		0	4.03778e+06	0.735461	2	6.85829	0	2.939e-12	59.76	0.000123331	2	1226.71	0.98976	37.2022	0
	High	GDGPIcLVLAPTR	2	8	2	B4DLW8;Q92841-1	C6(Carbamidomethyl)	0	960412	0.636254	2	45.5109	0	0.0007075	29.38	0.302493	2	1368.73	0.654285	44.7893	0
	High	VLEEANQAINPk	1	5	1	Q92841-1	K12(Lys8)	0	691464	0.849543	1		0	0.002745	26.3	0.543978	2	1333.72	0.946859	26.8401	0
	High	mLDmGFEPQIR	1	8	2	B4DLW8;Q92841-1	M1(Oxidation); M4(Oxidation)	0	919904	0.938279	1		0	0.002194	13.93	9.04834	2	1368.63	1.06183	35.1269	0
	High	mLDmGFEPQIr	1	8	2	B4DLW8;Q92841-1	M1(Oxidation); M4(Oxidation); R11(Arg10)	0	535712	0.864355	1		0.001	0.004906	16.02	5.48201	2	1378.64	0.0146444	35.7001	0
	High	GTAYTFFTPGNLK	1	5	1	Q92841-1		0	488839	0.91686	1		0.003	0.01916	11.21	21.5281	2	1416.72	-0.0673805	44.6616	0
O75643	U5 small nuclear ribonucleoprotein 200 kDa helicase OS=Homo sapiens GN=SNRNP200 PE=1 SV=2 - [U520_HUMAN]	150.666	1.5	1	2	2	8	2.7439e+06	0.890075	5	20.1624	2136	244.353	6.06201
	A2	Sequence	# PSMs	# Proteins	# Protein Groups	Protein Group Accessions	Modifications	ΔCn	Area	Heavy/Light	Heavy/Light Count	Heavy/Light Variability [%]	q-Value	PEP	IonScore	Exp Value	Charge	MH+ [Da]	ΔM [ppm]	RT [min]	# Missed Cleavages
	High	EEAsDDDmEGDEAVVr	2	1	1	O75643	S4(Phospho); M8(Oxidation); R16(Arg10)	0	4.37177e+06	0.890075	1		0	5.327e-12	51.55	0.000705091	2	1872.68	2.63102	24.3616	0
	High	EEAsDDDmEGDEAVVR	3	1	1	O75643	S4(Phospho); M8(Oxidation)	0	5.30663e+06	0.948347	2	10.5896	0	1.331e-09	49.83	0.000948927	2	1862.66	0.662036	24.3556	0
	High	NALLQLTDSQIADVAr	1	1	1	O75643	R16(Arg10)	0	181173	1.37815	1		0	6.435e-06	26.11	0.687575	2	1737.94	1.30401	49.5104	0
	High	EEAsDDDMEGDEAVVR	1	1	1	O75643	S4(Phospho)	0	620806	0.730127	1		0	4.721e-05	25.58	0.28458	2	1846.67	1.54982	29.6908	0
	High	NALLQLTDSQIADVAR	1	1	1	O75643		0	0				0	5.706e-06	22.7	1.46126	2	1727.94	6.59153	49.0596	0
P06748-3	Isoform 3 of Nucleophosmin OS=Homo sapiens GN=NPM1 - [NPM_HUMAN]	150.478	35.91	3	5	5	22	4.6734e+06	0.657584	13	15.1824	259	28.3827	4.71631
	A2	Sequence	# PSMs	# Proteins	# Protein Groups	Protein Group Accessions	Modifications	ΔCn	Area	Heavy/Light	Heavy/Light Count	Heavy/Light Variability [%]	q-Value	PEP	IonScore	Exp Value	Charge	MH+ [Da]	ΔM [ppm]	RT [min]	# Missed Cleavages
	High	VDNDENEHQLSLr	3	3	1	P06748-3	R13(Arg10)	0	1.85401e+06	0.671135	2	6.11561	0	5.271e-07	48.19	0.00471954	2	1578.74	1.04226	24.3118	0
	High	cGSGPVHISGQHLVAVEEDAEsEDEEEEDVk	2	3	1	P06748-3	C1(Carbamidomethyl); S22(Phospho); K31(Lys8)	0	4.69679e+06	0.647776	2	3.66492	0	2.44e-05	47.07	0.0174503	3	3468.46	1.30618	38.2358	0
	High	VDNDENEHQLSLR	3	3	1	P06748-3		0	2.00051e+06	0.743965	2	6.49867	0	4.573e-05	41.55	0.0206908	2	1568.73	1.10647	24.2949	0
	High	cGSGPVHISGQHLVAVEEDAEsEDEEEEDVK	3	3	1	P06748-3	C1(Carbamidomethyl); S22(Phospho)	0	8.38862e+06	0.593924	1		0	1.023e-06	38.24	0.125374	3	3460.44	1.84957	37.7075	0
	High	mSVQPTVSLGGFEITPPVVLR	3	3	1	P06748-3	M1(Oxidation)	0	1.04089e+06	0.48783	1		0	1.733e-07	36.14	0.0835097	2	2243.21	0.526576	57.3265	0
	High	GPSSVEDIk	3	3	1	P06748-3	K9(Lys8)	0	2.21498e+06	0.707367	2	10.8513	0	0.0004556	34.03	0.0574468	2	939.488	0.197013	21.3787	0
	High	mSVQPTVSLGGFEITPPVVLr	2	3	1	P06748-3	M1(Oxidation); R21(Arg10)	0	437071	0.442997	1		0	2.354e-05	32.09	0.203636	2	2253.22	-0.328474	57.4436	0
	High	DELHIVEAEAmNYEGSPIK	2	3	1	P06748-3	M11(Oxidation)	0	864385	0.540978	2	92.6073	0	0.004061	26.63	1.3071	3	2161.01	-1.46929	46.9049	0
	High	GPSSVEDIK	1	3	1	P06748-3		0	3.63108e+06				0.001	0.007539	17.92	2.04378	2	931.473	-0.414844	21.2343	0
Q96JM3	Chromosome alignment-maintaining phosphoprotein 1 OS=Homo sapiens GN=CHAMP1 PE=1 SV=2 - [CHAP1_HUMAN]	145.304	9.85	1	4	4	24	1.51581e+07	0.831533	13	71.0949	812	89.0429	8.44092
	A2	Sequence	# PSMs	# Proteins	# Protein Groups	Protein Group Accessions	Modifications	ΔCn	Area	Heavy/Light	Heavy/Light Count	Heavy/Light Variability [%]	q-Value	PEP	IonScore	Exp Value	Charge	MH+ [Da]	ΔM [ppm]	RT [min]	# Missed Cleavages
	High	DNQESsDAELSSSEYIK	3	1	1	Q96JM3	S6(Phospho)	0	3.00124e+06	0.953577	3	9.12909	0	4.748e-08	60.8	0.000203533	2	1981.8	2.70059	33.5886	0
	High	DNQESsDAELSSSEYIk	3	1	1	Q96JM3	S6(Phospho); K17(Lys8)	0	2.73896e+06				0	2.555e-06	40.78	0.0213455	2	1989.8	-0.949327	33.5975	0
	High	KPsPSEsPEPWKPFPAVSPEPR	1	1	1	Q96JM3	S3(Phospho); S7(Phospho)	0	7.71272e+06	0.25427	1		0	0.0003171	27.56	1.33996	3	2606.18	2.02307	42.8445	0
	High	GQESssDQEQVDVESIDFSK	4	1	1	Q96JM3	S5(Phospho); S6(Phospho)	0	2.19028e+06	0.954017	2	19.0986	0	6.34e-07	25.77	0.618425	2	2373.91	1.89887	42.0211	0
	High	GQESssDQEQVDVESIDFSk	4	1	1	Q96JM3	S5(Phospho); S6(Phospho); K20(Lys8)	0	2.01175e+06	1.02054	1		0	7.684e-10	24.8	0.925843	2	2381.93	4.54109	42.0276	0
	High	LAPVPsPEPQKPAPVsPESVK	4	1	1	Q96JM3	S6(Phospho); S16(Phospho)	0	3.47603e+07	0.29721	4	0.605546	0	4.479e-06	24.24	2.37983	2	2314.12	1.92301	34.617	0
	High	LAPVPsPEPQkPAPVsPESVk	4	1	1	Q96JM3	S6(Phospho); K11(Lys8); S16(Phospho); K21(Lys8)	0	9.21692e+06	0.280379	1		0	0.001675	20.84	5.24358	2	2330.15	1.45735	34.6492	0
	High	GQESSsDQEQVDVESIDFSK	1	1	1	Q96JM3	S6(Phospho)	0	1.04973e+06	1.28008	1		0	6.782e-05	14.4	13.3322	2	2293.94	3.25197	39.6219	0
P23246	Splicing factor, proline- and glutamine-rich OS=Homo sapiens GN=SFPQ PE=1 SV=2 - [SFPQ_HUMAN]	131.891	8.77	1	4	5	16	1.90253e+06	0.781061	12	12.0948	707	76.1016	9.43701
	A2	Sequence	# PSMs	# Proteins	# Protein Groups	Protein Group Accessions	Modifications	ΔCn	Area	Heavy/Light	Heavy/Light Count	Heavy/Light Variability [%]	q-Value	PEP	IonScore	Exp Value	Charge	MH+ [Da]	ΔM [ppm]	RT [min]	# Missed Cleavages
	High	FGQGGAGPVGGQGPR	3	1	1	P23246		0	2.9012e+06	0.754607	2	1.05707	0	1.926e-07	59.01	0.00031407	2	1341.67	0.932092	24.0272	0
	High	FGQGGAGPVGGQGPr	3	1	1	P23246	R15(Arg10)	0	1.91743e+06	0.750533	1		0	1.32e-07	55.49	0.000785882	2	1351.67	0.497151	24.0458	0
	High	YGEPGEVFINK	3	1	1	P23246		0	1.47402e+06	0.747932	3	7.62693	0	0.0008622	11.81	14.6897	2	1252.62	0.0126999	34.4321	0
	High	FATHAAALSVr	3	1	1	P23246	R11(Arg10)	0	802979	0.899398	2	10.8873	0.001	0.004983	20.59	1.6246	3	1153.64	-0.117322	26.6305	0
	High	FATHAAALSVR	2	1	1	P23246		0	759631	1.24073	2	12.6264	0.001	0.005171	17.3	3.4579	2	1143.63	0.0257285	26.6854	0
	High	AVVIVDDr	1	2	2	Q15233;P23246	R8(Arg10)	0	1.33236e+06	0.930125	1		0.004	0.03458	16.41	2.18503	2	896.508	0.516341	25.7676	0
	High	LFVGNLPADITEDEFKR	1	1	1	P23246		0	720560	0.0423298	1		0.008	0.07367	20.45	4.00658	3	1964.02	1.40559	48.8734	1
P16403	Histone H1.2 OS=Homo sapiens GN=HIST1H1C PE=1 SV=2 - [H12_HUMAN]	130.57	15.49	3	4	4	14	2.35389e+06	0.841355	10	33.244	213	21.3517	10.9312
	A2	Sequence	# PSMs	# Proteins	# Protein Groups	Protein Group Accessions	Modifications	ΔCn	Area	Heavy/Light	Heavy/Light Count	Heavy/Light Variability [%]	q-Value	PEP	IonScore	Exp Value	Charge	MH+ [Da]	ΔM [ppm]	RT [min]	# Missed Cleavages
	High	ALAAAGYDVEK	3	3	1	P16403		0	3.17683e+06	1.05603	2	0.33211	0	5.71e-07	56.8	0.000373775	2	1107.57	0.368143	27.1444	0
	High	ALAAAGYDVEk	3	3	1	P16403	K11(Lys8)	0	3.0126e+06	0.913541	1		0	2.633e-08	54.16	0.000713312	2	1115.58	1.09664	27.7798	0
	High	ASGPPVSELITK	2	3	1	P16403		0	2.09658e+06	0.726251	2	12.1999	0	7.237e-05	29.24	0.232769	2	1198.67	-0.261317	35.072	0
	High	ASGPPVSELITk	2	3	1	P16403	K12(Lys8)	0	1.71693e+06	0.680808	1		0	0.0002406	28.37	0.263147	2	1206.68	1.93379	34.9247	0
	High	KASGPPVSELITK	3	3	1	P16403		0	1.78825e+06	0.796479	3	16.3612	0	0.002509	16.68	3.36887	2	1326.76	0.224473	31.0656	1
	High	SGVSLAALk	1	3	1	P16403	K9(Lys8)	0	1.31726e+06	1.31883	1		0.001	0.01257	17.09	1.45403	2	853.523	-0.616958	32.4885	0
Q9NWH9	SAFB-like transcription modulator OS=Homo sapiens GN=SLTM PE=1 SV=2 - [SLTM_HUMAN]	127.046	4.74	1	5	5	13	1.08877e+07	0.83461	11	13.1178	1034	117.079	7.86963
	A2	Sequence	# PSMs	# Proteins	# Protein Groups	Protein Group Accessions	Modifications	ΔCn	Area	Heavy/Light	Heavy/Light Count	Heavy/Light Variability [%]	q-Value	PEP	IonScore	Exp Value	Charge	MH+ [Da]	ΔM [ppm]	RT [min]	# Missed Cleavages
	High	DGQDAIAQsPEk	3	1	1	Q9NWH9	S9(Phospho); K12(Lys8)	0	1.92304e+07	0.764226	3	0.948186	0	0.0003331	59.67	0.000163946	2	1346.57	0.815503	19.79	0
	High	IsskSPGHmVILDQTk	2	1	1	Q9NWH9	S2(Phospho); S3(Phospho); K4(Lys8); M9(Oxidation); K16(Lys8)	0	4.35889e+06	0.858674	2	4.21608	0	0.002948	35.23	0.136027	3	1932.89	0.834951	27.0209	1
	High	AGAGmITQHSSNAsPINr	2	1	1	Q9NWH9	M5(Oxidation); S14(Phospho); R18(Arg10)	0	1.848e+06	0.975469	2	7.94412	0	0.001534	22.81	2.03497	2	1917.86	2.00424	22.0026	0
	High	AGAGmITQHSSNAsPINR	1	1	1	Q9NWH9	M5(Oxidation); S14(Phospho)	0	3.03011e+06	1.10406	1		0	1.442e-07	16.86	7.82421	3	1907.84	0.295489	21.9785	0
	High	DGQDAIAQsPEK	2	1	1	Q9NWH9	S9(Phospho)	0	2.0428e+07				0.001	0.01263	23.92	0.566698	2	1338.56	0.9406	19.6162	0
	High	ISsKsPGHmVILDQTK	1	1	1	Q9NWH9	S3(Phospho); S5(Phospho); M9(Oxidation)	0	8.21498e+06	0.841478	1		0.001	0.004993	17.85	7.0086	3	1916.86	0.882461	26.9298	1
	High	sPGHmVILDQTK	1	1	1	Q9NWH9	S1(Phospho); M5(Oxidation)	0	2.67825e+06	0.562226	1		0.001	0.01111	12.48	12.7648	2	1421.65	0.99828	24.694	0
	High	DGQDAIAQsPEKESK	1	1	1	Q9NWH9	S9(Phospho)	0	4.02011e+06	0.77034	1		0.007	0.05525	18.3	4.09195	2	1682.73	0.721871	19.58	1
B4DY09	Interleukin enhancer-binding factor 2 OS=Homo sapiens GN=ILF2 PE=1 SV=1 - [B4DY09_HUMAN]	124.544	12.5	2	3	3	14	873605	0.845274	7	37.7663	352	38.8862	4.94482
	A2	Sequence	# PSMs	# Proteins	# Protein Groups	Protein Group Accessions	Modifications	ΔCn	Area	Heavy/Light	Heavy/Light Count	Heavy/Light Variability [%]	q-Value	PEP	IonScore	Exp Value	Charge	MH+ [Da]	ΔM [ppm]	RT [min]	# Missed Cleavages
	High	VLQSALAAIR	3	2	1	B4DY09		0	1.15183e+06	0.720062	2	26.7639	0	2.372e-08	45.02	0.00232619	2	1041.64	-0.0328415	37.0155	0
	High	NQDLAPNSAEQASILSLVTk	4	2	1	B4DY09	K20(Lys8)	0	770593	0.827544	2	44.8077	0	3.448e-11	43.68	0.0174484	2	2107.11	1.00854	50.6698	0
	High	VLQSALAAIr	1	2	1	B4DY09	R10(Arg10)	0	553205	1.08133	1		0	4.648e-06	42.96	0.00429192	2	1051.65	0.694141	36.5661	0
	High	ILPTLEAVAALGNk	1	2	1	B4DY09	K14(Lys8)	0	472450	0.689147	1		0	1.923e-11	40.39	0.00764656	2	1417.85	1.71567	50.9682	0
	High	NQDLAPNSAEQASILSLVTK	5	2	1	B4DY09		0	996530	0.845274	1		0	9.626e-10	29.3	0.514488	2	2099.1	-1.17894	50.6787	0
Q08211	ATP-dependent RNA helicase A OS=Homo sapiens GN=DHX9 PE=1 SV=4 - [DHX9_HUMAN]	123.54	9.37	1	9	9	24	1.60405e+06	0.754769	18	16.6522	1270	140.869	6.84424
	A2	Sequence	# PSMs	# Proteins	# Protein Groups	Protein Group Accessions	Modifications	ΔCn	Area	Heavy/Light	Heavy/Light Count	Heavy/Light Variability [%]	q-Value	PEP	IonScore	Exp Value	Charge	MH+ [Da]	ΔM [ppm]	RT [min]	# Missed Cleavages
	High	AAEcNIVVTQPR	2	1	1	Q08211	C4(Carbamidomethyl)	0	995847	0.728932	1		0	0.0005071	39.8	0.0276913	2	1357.69	1.02831	26.9126	0
	High	AAEcNIVVTQPr	2	1	1	Q08211	C4(Carbamidomethyl); R12(Arg10)	0	931163	0.693776	2	12.0888	0	8.648e-05	36.79	0.0541433	2	1367.7	0.508509	26.8216	0
	High	ELDALDANDELTPLGr	3	1	1	Q08211	R16(Arg10)	0	650453	0.712364	3	15.0364	0	1.299e-08	34.68	0.141627	2	1751.87	0.725137	44.5914	0
	High	DKDDDGGEDDDANcNLIcGDEYGPETR	2	1	1	Q08211	C14(Carbamidomethyl); C18(Carbamidomethyl)	0	2.37057e+06	0.747605	2	0.267962	0	6.256e-07	31.92	0.247338	3	3045.17	2.72183	34.4265	1
	High	ELDALDANDELTPLGR	2	1	1	Q08211		0	1.44573e+06				0	3.901e-09	28.22	0.604677	2	1741.86	1.34178	44.5546	0
	High	ISAVSVAER	1	1	1	Q08211		0	796628	0.841628	1		0	0.0004124	24.26	0.437031	2	931.521	0.620027	24.6453	0
	High	LAAQScALSLVr	3	1	1	Q08211	C6(Carbamidomethyl); R12(Arg10)	0	869186	0.986613	2	16.7778	0	0.001507	21.45	1.5261	2	1298.71	-0.0495548	37.6567	0
	High	LAAQScALSLVR	1	1	1	Q08211	C6(Carbamidomethyl)	0	617037	1.00494	1		0	0.003138	21.13	1.56301	2	1288.71	0.967354	37.1262	0
	High	QPAIISQLDPVNER	1	1	1	Q08211		0	896222	1.04879	1		0	0.00056	20.17	2.85407	2	1579.85	1.69885	41.6529	0
	High	QPAIISQLDPVNEr	1	1	1	Q08211	R14(Arg10)	0	694240				0	0.001896	15.49	7.49723	2	1589.86	6.46852	41.6015	0
	High	LAQFEPSQr	1	1	1	Q08211	R9(Arg10)	0	993054	0.806321	1		0.001	0.009621	42.46	0.00942408	2	1085.56	-0.0676188	24.9343	0
	High	DkDDDGGEDDDANcNLIcGDEYGPETr	1	1	1	Q08211	K2(Lys8); C14(Carbamidomethyl); C18(Carbamidomethyl); R27(Arg10)	0	1.48461e+06				0.001	0.008836	13.11	20.1447	3	3063.18	-0.982685	34.4328	1
	High	DVVQAYPEVR	3	1	1	Q08211		0	814714	0.757053	3	7.67709	0.002	0.01523	13.94	8.15767	2	1175.61	1.2078	30.651	0
	High	LGGIGQFLAk	1	1	1	Q08211	K10(Lys8)	0	739082	0.658832	1		0.008	0.07519	19.57	0.934603	2	1011.61	-0.820618	41.8021	0
A0A087WY61	Nuclear mitotic apparatus protein 1 OS=Homo sapiens GN=NUMA1 PE=1 SV=1 - [A0A087WY61_HUMAN]	120.007	1.81	3	2	2	6	1.03457e+07	0.458715	4	2.25101	2099	236.019	5.92236
	A2	Sequence	# PSMs	# Proteins	# Protein Groups	Protein Group Accessions	Modifications	ΔCn	Area	Heavy/Light	Heavy/Light Count	Heavy/Light Variability [%]	q-Value	PEP	IonScore	Exp Value	Charge	MH+ [Da]	ΔM [ppm]	RT [min]	# Missed Cleavages
	High	TQPDGTSVPGEPAsPISQR	3	3	1	A0A087WY61	S14(Phospho)	0	2.01259e+07	0.453166	2	2.25101	0	7.945e-14	62.64	0.000248103	2	2003.91	0.278492	30.3867	0
	High	TQPDGTSVPGEPAsPISQr	2	3	1	A0A087WY61	S14(Phospho); R19(Arg10)	0	8.24162e+06	0.457336	1		0	1.696e-08	45.37	0.0131843	2	2013.92	2.1719	29.8233	0
	High	QAQLAQTLQQQEQASQGLR	1	3	1	A0A087WY61		0	565443	1.01171	1		0	2.517e-07	26.88	0.949175	2	2126.1	2.78744	37.62	0
O95218-2	Isoform 2 of Zinc finger Ran-binding domain-containing protein 2 OS=Homo sapiens GN=ZRANB2 - [ZRAB2_HUMAN]	115.821	4.38	3	2	2	9	2.661e+06	0.893945	6	8.95698	320	36.2965	9.75928
	A2	Sequence	# PSMs	# Proteins	# Protein Groups	Protein Group Accessions	Modifications	ΔCn	Area	Heavy/Light	Heavy/Light Count	Heavy/Light Variability [%]	q-Value	PEP	IonScore	Exp Value	Charge	MH+ [Da]	ΔM [ppm]	RT [min]	# Missed Cleavages
	High	YNLDAsEEEDSNK	3	3	1	O95218-2	S6(Phospho)	0	3.81559e+06	0.842553	3	2.01538	0	3.978e-14	70.99	8.16063e-06	2	1593.6	0.989621	25.7077	0
	High	YNLDAsEEEDSNk	2	3	1	O95218-2	S6(Phospho); K13(Lys8)	0	2.76589e+06				0	2.774e-07	25.38	0.347681	2	1601.61	0.426896	25.7742	0
	High	YNLDAsEEEDSNkk	3	3	1	O95218-2	S6(Phospho); K13(Lys8); K14(Lys8)	0	1.5064e+06	0.950533	3	1.3	0.001	0.009583	28.17	0.328052	2	1737.72	1.21448	23.0305	1
	High	YNLDAsEEEDSNKK	1	3	1	O95218-2	S6(Phospho)	0	1.23022e+06				0.008	0.06506	21.09	1.35262	2	1721.69	1.0582	23.0666	1
Q96KK5	Histone H2A type 1-H OS=Homo sapiens GN=HIST1H2AH PE=1 SV=3 - [H2A1H_HUMAN]	112.392	27.34	10	3	3	17	1.16556e+07	0.933189	7	17.189	128	13.8978	10.8872
	A2	Sequence	# PSMs	# Proteins	# Protein Groups	Protein Group Accessions	Modifications	ΔCn	Area	Heavy/Light	Heavy/Light Count	Heavy/Light Variability [%]	q-Value	PEP	IonScore	Exp Value	Charge	MH+ [Da]	ΔM [ppm]	RT [min]	# Missed Cleavages
	High	AGLQFPVGr	3	10	1	Q96KK5	R9(Arg10)	0	1.50218e+07	0.933189	3	1.47073	0	6.982e-07	50.65	0.00142279	2	954.54	0.434022	35.7985	0
	High	VTIAQGGVLPNIQAVLLPk	4	10	1	Q96KK5	K19(Lys8)	0	5.14229e+06	0.799931	2	3.43976	0	3.451e-10	32.92	0.0128647	2	1939.18	0.588598	57.5957	0
	High	AGLQFPVGR	3	10	1	Q96KK5		0	1.85653e+07				0	0.001762	30.66	0.114721	2	944.532	0.404973	35.7933	0
	High	VTIAQGGVLPNIQAVLLPK	4	10	1	Q96KK5		0	6.90571e+06				0	4.203e-07	25.81	0.0817444	2	1931.17	0.168681	57.4884	0
	High	HLQLAIr	2	10	1	Q96KK5	R7(Arg10)	0	8.89937e+06	1.07339	2	3.68934	0	0.002273	17.47	1.21672	2	860.534	0.0638161	28.2264	0
	High	HLQLAIR	1	10	1	Q96KK5		0	9.49563e+06				0.001	0.005046	20.46	0.53655	2	850.526	0.0272005	27.548	0
Q09028-4	Isoform 4 of Histone-binding protein RBBP4 OS=Homo sapiens GN=RBBP4 - [RBBP4_HUMAN]	111.92	6.41	4	2	2	6	928391	1.13796	5	27.1059	390	43.455	4.95752
	A2	Sequence	# PSMs	# Proteins	# Protein Groups	Protein Group Accessions	Modifications	ΔCn	Area	Heavy/Light	Heavy/Light Count	Heavy/Light Variability [%]	q-Value	PEP	IonScore	Exp Value	Charge	MH+ [Da]	ΔM [ppm]	RT [min]	# Missed Cleavages
	High	TPSSDVLVFDYTK	4	4	1	Q09028-4		0	1.37596e+06	0.845027	3	8.4308	0	3.033e-16	75.97	7.92935e-06	2	1471.73	0.0432698	42.6127	0
	High	GEFGGFGSVSGk	2	4	1	Q09028-4	K12(Lys8)	0	480822	1.24488	2	13.3727	0	6.648e-05	20.13	1.78622	2	1136.55	1.31696	33.9413	0
P52948-4	Isoform 4 of Nuclear pore complex protein Nup98-Nup96 OS=Homo sapiens GN=NUP98 - [NUP98_HUMAN]	109.193	5	6	3	3	11	1.60238e+06	0.800956	7	10.0613	920	96.016	7.63525
	A2	Sequence	# PSMs	# Proteins	# Protein Groups	Protein Group Accessions	Modifications	ΔCn	Area	Heavy/Light	Heavy/Light Count	Heavy/Light Variability [%]	q-Value	PEP	IonScore	Exp Value	Charge	MH+ [Da]	ΔM [ppm]	RT [min]	# Missed Cleavages
	High	NLNNSNLFsPVNR	3	6	1	P52948-4	S9(Phospho)	0	1.68302e+06	0.758627	3	1.9863	0	6.62e-07	46.97	0.00591879	2	1568.72	0.295315	39.5969	0
	High	YGLQDsDEEEEEHPSK	4	6	1	P52948-4	S6(Phospho)	0	2.59192e+06	0.865499	2	3.38294	0	0.000169	36.16	0.0402012	2	1971.75	1.16148	24.8269	0
	High	YGLQDsDEEEEEHPSk	3	6	1	P52948-4	S6(Phospho); K16(Lys8)	0	1.90869e+06	0.985619	1		0	3.683e-05	26.29	0.443611	2	1979.77	1.38379	25.3556	0
	High	DSENLAsPSEYPENGER	1	6	1	P52948-4	S7(Phospho)	0	532218	0.468234	1		0.002	0.01528	20.68	1.74989	2	1973.78	1.26648	30.816	0
P13645	Keratin, type I cytoskeletal 10 OS=Homo sapiens GN=KRT10 PE=1 SV=6 - [K1C10_HUMAN]	106.651	16.95	1	6	6	12	1.60671e+06	0.0357085	11	56.1512	584	58.7917	5.21143
	A2	Sequence	# PSMs	# Proteins	# Protein Groups	Protein Group Accessions	Modifications	ΔCn	Area	Heavy/Light	Heavy/Light Count	Heavy/Light Variability [%]	q-Value	PEP	IonScore	Exp Value	Charge	MH+ [Da]	ΔM [ppm]	RT [min]	# Missed Cleavages
	High	NVSTGDVNVEmNAAPGVDLTQLLNNmR	3	1	1	P13645	M11(Oxidation); M26(Oxidation)	0	1.53398e+06	0.0630131	3	15.775	0	3.249e-10	53.13	0.00449489	2	2904.38	0.457757	50.635	0
	High	GSLGGGFSSGGFSGGSFSR	3	1	1	P13645		0	2.35635e+06	0.0172152	2	15.7795	0	1.561e-08	39.42	0.0392693	2	1707.78	1.6634	39.6667	0
	High	TIDDLKNQILNLTTDNANILLQIDNAR	1	1	1	P13645		0	929809	0.0703377	1		0	4.811e-08	32.86	0.184993	3	3052.62	-1.09174	65.398	1
	High	ISSSKGSLGGGFSSGGFSGGSFSR	3	1	1	P13645		0	877983	0.0357085	3	31.2115	0	9.912e-06	29.28	0.709904	3	2210.05	1.61814	37.0364	1
	High	ALEESNYELEGK	1	1	1	P13645		0	598999	0.0318417	1		0	0.001562	25.27	0.698639	2	1381.65	0.721037	28.8218	0
	High	LENEIQTYR	1	1	1	P13645		0	492847	0.0349848	1		0.003	0.02276	18.5	2.63156	2	1165.58	0.0644877	26.6966	0
O00148	ATP-dependent RNA helicase DDX39A OS=Homo sapiens GN=DDX39A PE=1 SV=2 - [DX39A_HUMAN]	106.29	8.43	3	3	3	7	1.13226e+06	1.30007	6	12.2882	427	49.098	5.68115
	A2	Sequence	# PSMs	# Proteins	# Protein Groups	Protein Group Accessions	Modifications	ΔCn	Area	Heavy/Light	Heavy/Light Count	Heavy/Light Variability [%]	q-Value	PEP	IonScore	Exp Value	Charge	MH+ [Da]	ΔM [ppm]	RT [min]	# Missed Cleavages
	High	ILVATNLFGR	2	3	1	O00148		0	1.60048e+06	1.3299	2	9.31547	0	5.484e-09	82.44	5.90405e-07	2	1103.66	-0.606675	45.1083	0
	High	GLAITFVSDENDAK	2	3	1	O00148		0	813833	0.689154	1		0	2.368e-08	36.79	0.0664671	2	1479.73	0.461344	40.708	0
	High	GSYVSIHSSGFr	3	3	1	O00148	R12(Arg10)	0	982450	1.35313	3	17.8971	0	0.0001667	22.27	1.45711	3	1306.64	-0.286551	28.9094	0
P26038	Moesin OS=Homo sapiens GN=MSN PE=1 SV=3 - [MOES_HUMAN]	91.9	6.24	1	3	3	5	765372	1.09108	4	28.6852	577	67.7778	6.40479
	A2	Sequence	# PSMs	# Proteins	# Protein Groups	Protein Group Accessions	Modifications	ΔCn	Area	Heavy/Light	Heavy/Light Count	Heavy/Light Variability [%]	q-Value	PEP	IonScore	Exp Value	Charge	MH+ [Da]	ΔM [ppm]	RT [min]	# Missed Cleavages
	High	ALTSELANAr	1	1	1	P26038	R10(Arg10)	0	1.12552e+06	1.22369	1		0	4.332e-08	56.44	0.000381678	2	1055.57	0.787445	28.1898	0
	High	ALTSELANAR	1	1	1	P26038		0	1.12344e+06				0	9.937e-07	46.42	0.00348322	2	1045.56	0.414334	28.2266	0
	High	APDFVFYAPR	2	1	1	P26038		0	967236	0.854949	2	19.3286	0	0.0001898	45.93	0.00531983	2	1182.59	-0.0908937	43.5652	0
	High	IAQDLEmYGVNYFSIK	1	1	1	P26038	M7(Oxidation)	0	203358	1.42162	1		0.001	0.009946	12.88	25.3647	2	1906.94	5.56313	49.454	0
P55081	Microfibrillar-associated protein 1 OS=Homo sapiens GN=MFAP1 PE=1 SV=2 - [MFAP1_HUMAN]	91.55	14.81	1	4	4	12	3.20275e+06	0.826792	9	3.89846	439	51.9266	4.98291
	A2	Sequence	# PSMs	# Proteins	# Protein Groups	Protein Group Accessions	Modifications	ΔCn	Area	Heavy/Light	Heavy/Light Count	Heavy/Light Variability [%]	q-Value	PEP	IonScore	Exp Value	Charge	MH+ [Da]	ΔM [ppm]	RT [min]	# Missed Cleavages
	High	IVEPEVVGEsDsEVEGDAWr	3	1	1	P55081	S10(Phospho); S12(Phospho); R20(Arg10)	0	5.81093e+06	0.837592	1		0	5.938e-14	45.98	0.00951352	2	2371.97	3.2889	44.8915	0
	High	kIVEPEVVGEsDsEVEGDAWr	2	1	1	P55081	K1(Lys8); S11(Phospho); S13(Phospho); R21(Arg10)	0	992000	0.805343	1		0	2.736e-05	32.47	0.305996	2	2508.07	0.272297	42.4017	1
	High	KIVEPEVVGEsDsEVEGDAWR	2	1	1	P55081	S11(Phospho); S13(Phospho)	0	1.18718e+06	0.787732	2	23.5061	0	9.8e-06	26.07	1.23846	2	2490.05	0.179057	42.6539	1
	High	RPDYAPmEssDEEDEEFQFIK	2	1	1	P55081	M7(Oxidation); S9(Phospho); S10(Phospho)	0	2.52395e+06	0.556574	2	4.48318	0	9.368e-05	21.47	1.74578	3	2738.03	0.369989	46.2097	0
	High	IVEPEVVGEsDsEVEGDAWR	2	1	1	P55081	S10(Phospho); S12(Phospho)	0	5.89712e+06	0.834392	2	0.275353	0	1.449e-05	18.64	4.98947	2	2361.96	1.22211	45.2388	0
	High	SLAALDALNtDDENDEEEYEAWK	1	1	1	P55081	T10(Phospho)	0	929632	0.826792	1		0.007	0.05594	15.4	13.9818	2	2721.12	2.27684	50.8571	0
H3BM18	Gamma-interferon-inducible protein 16 (Fragment) OS=Homo sapiens GN=IFI16 PE=1 SV=1 - [H3BM18_HUMAN]	90.75	22.75	5	2	2	12	7.28404e+06	0.655388	8	9.88819	167	18.3188	9.70068
	A2	Sequence	# PSMs	# Proteins	# Protein Groups	Protein Group Accessions	Modifications	ΔCn	Area	Heavy/Light	Heavy/Light Count	Heavy/Light Variability [%]	q-Value	PEP	IonScore	Exp Value	Charge	MH+ [Da]	ΔM [ppm]	RT [min]	# Missed Cleavages
	High	VSEEQTQPPsPAGAGmSTAmGR	3	5	1	H3BM18	S10(Phospho); M16(Oxidation); M20(Oxidation)	0	1.37315e+07	0.704477	1		0	8.534e-09	38.18	0.0617798	2	2300.96	2.44381	24.0417	0
	High	VSEEQTQPPsPAGAGMSTAmGr	2	5	1	H3BM18	S10(Phospho); M20(Oxidation); R22(Arg10)	0	1.35232e+06	0.484677	1		0	6.316e-06	37.81	0.0731271	2	2294.97	1.95041	29.2557	0
	High	VSEEQTQPPsPAGAGmSTAmGr	3	5	1	H3BM18	S10(Phospho); M16(Oxidation); M20(Oxidation); R22(Arg10)	0	8.06368e+06	0.655388	2	0.657455	0	3.132e-07	37.09	0.0835969	2	2310.96	1.17925	24.8355	0
	High	VSEEQTQPPsPAGAGmSTAMGR	3	5	1	H3BM18	S10(Phospho); M16(Oxidation)	0	2.45218e+06	0.616705	3	3.17723	0	0.0001736	23.35	2.02569	2	2284.96	2.26559	27.6207	0
	High	EVDATSPAPSTSSTVK	1	5	1	H3BM18		0	836594	0.776498	1		0	0.0007733	15.08	10.0867	2	1576.77	0.107797	22.4752	0
Q9NR30-2	Isoform 2 of Nucleolar RNA helicase 2 OS=Homo sapiens GN=DDX21 - [DDX21_HUMAN]	88.7433	4.9	2	3	3	12	1.10409e+07	0.327769	8	8.61738	715	79.6074	9.37842
	A2	Sequence	# PSMs	# Proteins	# Protein Groups	Protein Group Accessions	Modifications	ΔCn	Area	Heavy/Light	Heavy/Light Count	Heavy/Light Variability [%]	q-Value	PEP	IonScore	Exp Value	Charge	MH+ [Da]	ΔM [ppm]	RT [min]	# Missed Cleavages
	High	APQVLVLAPTR	1	2	1	Q9NR30-2		0	678515	0.417725	1		0	0.003652	44.89	0.00271797	2	1164.71	0.337807	36.8022	0
	High	NEEPsEEEIDAPKPK	6	2	1	Q9NR30-2	S5(Phospho)	0	3.18982e+07	0.326402	5	2.49248	0	8.269e-07	40.52	0.0256166	2	1791.77	1.74785	24.8331	0
	High	NEEPsEEEIDAPkPk	4	2	1	Q9NR30-2	S5(Phospho); K13(Lys8); K15(Lys8)	0	9.18114e+06	0.303222	1		0	6.277e-05	28.97	0.43322	2	1807.8	1.01414	24.888	0
	High	AAVIGDVIR	1	2	1	Q9NR30-2		0	545955	0.454355	1		0.004	0.04259	13.23	3.97618	2	913.547	0.284894	33.4325	0
Q9UKM9-2	Isoform 1 of RNA-binding protein Raly OS=Homo sapiens GN=RALY - [RALY_HUMAN]	88.185	14.48	2	2	2	10	1.19082e+07	0.778058	8	13.1151	290	30.3458	9.62744
	A2	Sequence	# PSMs	# Proteins	# Protein Groups	Protein Group Accessions	Modifications	ΔCn	Area	Heavy/Light	Heavy/Light Count	Heavy/Light Variability [%]	q-Value	PEP	IonScore	Exp Value	Charge	MH+ [Da]	ΔM [ppm]	RT [min]	# Missed Cleavages
	High	TRDDGDEEGLLTHsEEELEHSQDTDADDGALQ	3	2	1	Q9UKM9-2	S14(Phospho)	0	1.30401e+07	0.888103	2	10.9168	0	2.308e-05	41.12	0.0548565	3	3607.45	0.190285	36.9909	1
	High	TrDDGDEEGLLTHsEEELEHSQDTDADDGALQ	4	2	1	Q9UKM9-2	R2(Arg10); S14(Phospho)	0	8.32675e+06	0.860776	3	34.2165	0	4.033e-07	36.91	0.155426	3	3617.46	1.58208	37.503	1
	High	GRLsPVPVPR	2	2	1	Q9UKM9-2	S4(Phospho)	0	1.07764e+07	0.724894	2	0.64596	0.001	0.007083	27.94	0.317371	2	1157.62	-0.268039	29.1557	1
	High	GrLsPVPVPr	1	2	1	Q9UKM9-2	R2(Arg10); S4(Phospho); R10(Arg10)	0	9.74662e+06	0.733575	1		0.008	0.07479	23.86	0.794547	2	1177.64	0.20512	29.0422	1
P04264	Keratin, type II cytoskeletal 1 OS=Homo sapiens GN=KRT1 PE=1 SV=6 - [K2C1_HUMAN]	87.8529	12.11	1	5	5	7	1.9868e+06	0.019193	7	95.8016	644	65.999	8.11865
	A2	Sequence	# PSMs	# Proteins	# Protein Groups	Protein Group Accessions	Modifications	ΔCn	Area	Heavy/Light	Heavy/Light Count	Heavy/Light Variability [%]	q-Value	PEP	IonScore	Exp Value	Charge	MH+ [Da]	ΔM [ppm]	RT [min]	# Missed Cleavages
	High	FLEQQNQVLQTK	3	1	1	P04264		0	2.03331e+06	0.017362	3	14.9479	0	9.227e-06	52.38	0.00156866	2	1475.79	0.582138	31.6313	0
	High	GGGGGGYGSGGSSYGSGGGSYGSGGGGGGGR	1	1	1	P04264		0	481464	0.074331	1		0	5.619e-08	27.76	0.574087	2	2383.96	1.63042	22.4182	0
	High	QISNLQQSISDAEQR	1	1	1	P04264		0	811982	0.0330767	1		0	1.994e-06	23.8	1.68457	2	1716.85	-0.319051	35.7739	0
	High	SLNNQFASFIDK	1	1	1	P04264		0	470608	0.0387433	1		0.001	0.006705	17.37	5.11949	2	1383.69	0.701369	44.8773	0
	High	SISISVAR	1	1	1	P04264		0	3.1151e+06	0.01	1		0.003	0.01808	26.02	0.242534	2	832.489	0.249733	28.4193	0
Q5VT52-5	Isoform 5 of Regulation of nuclear pre-mRNA domain-containing protein 2 OS=Homo sapiens GN=RPRD2 - [RPRD2_HUMAN]	83.4533	4.93	4	2	2	7	2.95748e+06	0.782261	4	12.2933	934	100.21	6.48096
	A2	Sequence	# PSMs	# Proteins	# Protein Groups	Protein Group Accessions	Modifications	ΔCn	Area	Heavy/Light	Heavy/Light Count	Heavy/Light Variability [%]	q-Value	PEP	IonScore	Exp Value	Charge	MH+ [Da]	ΔM [ppm]	RT [min]	# Missed Cleavages
	High	SFNYsPNSSTSEVSSTSASK	3	4	1	Q5VT52-5	S5(Phospho)	0	3.68691e+06	0.83254	2	12.2933	0	2.51e-07	43.3	0.0155241	2	2146.89	1.87211	31.0468	0
	High	SFNYsPNSSTSEVSSTSASk	3	4	1	Q5VT52-5	S5(Phospho); K20(Lys8)	0	2.64898e+06	0.798314	1		0	5.051e-06	25.89	0.92052	2	2154.9	0.827462	30.96	0
	High	NTGVSPASRPsPGTPTSPSNLTSGLK	1	4	1	Q5VT52-5	S11(Phospho)	0	2.22804e+06	0.32742	1		0.001	0.007831	10.6	63.7197	3	2590.26	2.82273	34.8469	0
O60832	H/ACA ribonucleoprotein complex subunit 4 OS=Homo sapiens GN=DKC1 PE=1 SV=3 - [DKC1_HUMAN]	82.035	3.7	1	2	2	10	7.74696e+06	0.70386	7	3.6667	514	57.6378	9.42236
	A2	Sequence	# PSMs	# Proteins	# Protein Groups	Protein Group Accessions	Modifications	ΔCn	Area	Heavy/Light	Heavy/Light Count	Heavy/Light Variability [%]	q-Value	PEP	IonScore	Exp Value	Charge	MH+ [Da]	ΔM [ppm]	RT [min]	# Missed Cleavages
	High	AGLESGAEPGDGDSDTtk	2	1	1	O60832	T17(Phospho); K18(Lys8)	0	9.4651e+06	0.720352	2	0.345263	0	9.953e-11	47.53	0.00346762	2	1794.72	1.41416	23.5095	0
	High	AGLESGAEPGDGDsDTTKK	5	1	1	O60832	S14(Phospho)	0	6.02883e+06	0.695213	4	2.69133	0	0.0001497	32.06	0.170106	2	1914.8	1.98364	20.6654	1
	High	AGLESGAEPGDGDSDtTkk	3	1	1	O60832	T16(Phospho); K18(Lys8); K19(Lys8)	0	3.67472e+06	0.592411	1		0	0.0007266	25.3	0.977588	3	1930.83	0.971645	20.7073	1
Q08945	FACT complex subunit SSRP1 OS=Homo sapiens GN=SSRP1 PE=1 SV=1 - [SSRP1_HUMAN]	78.93	4.94	1	2	2	7	5.28322e+06	0.837545	4	2.9252	709	81.0244	6.87354
	A2	Sequence	# PSMs	# Proteins	# Protein Groups	Protein Group Accessions	Modifications	ΔCn	Area	Heavy/Light	Heavy/Light Count	Heavy/Light Variability [%]	q-Value	PEP	IonScore	Exp Value	Charge	MH+ [Da]	ΔM [ppm]	RT [min]	# Missed Cleavages
	High	EGmNPSYDEYADsDEDQHDAYLEr	4	1	1	Q08945	M3(Oxidation); S13(Phospho); R24(Arg10)	0	5.91097e+06	0.85356	3	0.232814	0	1.081e-13	46.67	0.00503751	3	2955.08	0.982113	33.8062	0
	High	ASSGLLYPLER	1	1	1	Q08945		0	270667	0.454825	1		0	0.001261	41	0.0151995	2	1205.65	-0.504484	40.86	0
	High	EGmNPSYDEYADsDEDQHDAYLER	2	1	1	Q08945	M3(Oxidation); S13(Phospho)	0	1.02958e+07				0	8.686e-13	33.83	0.102134	3	2945.08	1.76219	33.8	0
P43243	Matrin-3 OS=Homo sapiens GN=MATR3 PE=1 SV=2 - [MATR3_HUMAN]	78.88	10.04	4	5	5	13	1.7372e+06	0.827952	9	23.8629	847	94.5648	6.25244
	A2	Sequence	# PSMs	# Proteins	# Protein Groups	Protein Group Accessions	Modifications	ΔCn	Area	Heavy/Light	Heavy/Light Count	Heavy/Light Variability [%]	q-Value	PEP	IonScore	Exp Value	Charge	MH+ [Da]	ΔM [ppm]	RT [min]	# Missed Cleavages
	High	GDADQASNILASFGLSAR	3	4	1	P43243		0	372827	0.872319	3	14.0492	0	2.75e-13	47.92	0.00719681	2	1792.89	1.82861	54.7668	0
	High	GDADQASNILASFGLSAr	2	4	1	P43243	R18(Arg10)	0	278904				0	4.923e-10	30.13	0.429014	2	1802.89	-0.601403	54.8034	0
	High	IGPYQPNVPVGIDYVIPK	2	2	1	P43243		0	2.09387e+06	0.490354	2	1.04337	0	0.0001587	14.25	9.94278	2	1969.08	0.677867	50.9714	0
	High	DTSENADGQsDENkDDYTIPDEYr	1	3	1	P43243	S10(Phospho); K14(Lys8); R24(Arg10)	0	2.39417e+06				0	0.0007583	10.85	29.6336	3	2875.11	-1.26054	34.0393	1
	High	GNLGAGNGNLQGPR	1	4	1	P43243		0	626950	0.739539	1		0.001	0.006109	16.78	6.17298	2	1324.67	1.44963	24.1102	0
	High	DTSENADGQsDENKDDYTIPDEYR	1	3	1	P43243	S10(Phospho)	0	2.30813e+06	1.25377	1		0.001	0.006449	16.18	8.02499	3	2857.09	-0.518324	34.0648	1
	High	GNLGAGNGNLQGPr	1	4	1	P43243	R14(Arg10)	0	531320	0.827952	1		0.001	0.01068	15.39	8.31938	2	1334.68	0.456507	23.6043	0
	High	IGPYQPNVPVGIDYVIPk	1	2	1	P43243	K18(Lys8)	0	829722				0.001	0.01184	14.22	8.3825	2	1977.1	2.13728	51.0233	0
	High	TEEGPTLSYGR	1	4	1	P43243		0	723553	0.970377	1		0.003	0.02685	13.79	7.49379	2	1209.57	-0.116413	26.9102	0
P52272-2	Isoform 2 of Heterogeneous nuclear ribonucleoprotein M OS=Homo sapiens GN=HNRNPM - [HNRPM_HUMAN]	77.7733	10.13	3	5	5	11	1.59671e+06	0.831942	9	62.8591	691	73.5724	8.82178
	A2	Sequence	# PSMs	# Proteins	# Protein Groups	Protein Group Accessions	Modifications	ΔCn	Area	Heavy/Light	Heavy/Light Count	Heavy/Light Variability [%]	q-Value	PEP	IonScore	Exp Value	Charge	MH+ [Da]	ΔM [ppm]	RT [min]	# Missed Cleavages
	High	INEILSNALK	2	3	1	P52272-2		0	843433	1.03125	2	32.6648	0	0.0002145	47.17	0.00272067	2	1114.65	0.505178	37.7354	0
	High	GNFGGSFAGSFGGAGGHAPGVAR	2	3	1	P52272-2		0	1.75747e+06	0.418994	2	4.4063e+06	0	8.546e-11	34.65	0.179627	3	2034.96	1.1775	38.4788	0
	High	LGSTVFVANLDYK	2	3	1	P52272-2		0	429074	1.22881	2	0.122527	0	0.004792	18.3	3.79761	2	1426.76	1.55877	43.462	0
	High	FESPEVAER	1	3	1	P52272-2		0	829609	0.703262	1		0	0.0004755	16.07	3.63467	2	1063.5	-0.555605	25.5428	0
	High	QGGGGGGGSVPGIER	1	3	1	P52272-2		0	2.11989e+06	0.646744	1		0	0.0002327	14.46	7.86559	2	1284.63	0.385302	23.3452	0
	High	QGGGGGGGSVPGIEr	2	3	1	P52272-2	R15(Arg10)	0	1.23392e+06	0.788869	1		0	0.0003577	12.44	13.2791	2	1294.64	0.124005	23.4003	0
	High	INEILSNALk	1	3	1	P52272-2	K10(Lys8)	0	912763				0.004	0.03247	27.65	0.202284	2	1122.66	0.0320405	37.741	0
E9PL71	Elongation factor 1-delta (Fragment) OS=Homo sapiens GN=EEF1D PE=1 SV=1 - [E9PL71_HUMAN]	76.69	30.48	11	3	3	8	2.85693e+06	0.584037	6	3.34955	187	20.8063	5.0083
	A2	Sequence	# PSMs	# Proteins	# Protein Groups	Protein Group Accessions	Modifications	ΔCn	Area	Heavy/Light	Heavy/Light Count	Heavy/Light Variability [%]	q-Value	PEP	IonScore	Exp Value	Charge	MH+ [Da]	ΔM [ppm]	RT [min]	# Missed Cleavages
	High	KPATPAEDDEDDDIDLFGsDNEEEDKEAAQLR	4	11	1	E9PL71	S19(Phospho)	0	5.86331e+06	0.57116	4	3.34955	0	7.863e-08	57.33	0.00187192	3	3657.53	1.46974	42.1781	1
	High	kPATPAEDDEDDDIDLFGsDNEEEDkEAAQLr	2	11	1	E9PL71	K1(Lys8); S19(Phospho); K26(Lys8); R32(Arg10)	0	3.29492e+06	0.588377	1		0	1.637e-08	35.37	0.310774	3	3683.58	4.19743	42.3892	1
	High	ATAPQTQHVsPmr	1	11	1	E9PL71	S10(Phospho); M12(Oxidation); R13(Arg10)	0	2.41026e+06	0.724647	1		0.003	0.02701	11.33	17.8935	2	1529.68	0.687675	17.5717	0
	High	IASLEVENQSLR	1	9	1	E9PL71		0	297211				0.008	0.07672	10.15	25.8998	2	1358.73	0.97596	33.9529	0
Q15717	ELAV-like protein 1 OS=Homo sapiens GN=ELAVL1 PE=1 SV=2 - [ELAV1_HUMAN]	75.79	10.74	2	3	3	5	722770	0.897618	4	7.45468	326	36.0692	9.17334
	A2	Sequence	# PSMs	# Proteins	# Protein Groups	Protein Group Accessions	Modifications	ΔCn	Area	Heavy/Light	Heavy/Light Count	Heavy/Light Variability [%]	q-Value	PEP	IonScore	Exp Value	Charge	MH+ [Da]	ΔM [ppm]	RT [min]	# Missed Cleavages
	High	VLVDQTTGLSR	1	2	1	Q15717		0	1.36351e+06	0.976257	1		0	5.23e-06	42.38	0.0105647	2	1188.66	-0.375875	28.6589	0
	High	DANLYISGLPr	2	2	1	Q15717	R11(Arg10)	0	325793	0.751945	2	24.1582	0	1.325e-06	36.79	0.0490336	2	1228.66	0.614964	40.5726	0
	High	SLFSSIGEVESAK	1	2	1	Q15717		0	479006	0.912497	1		0	4.893e-08	30.83	0.22208	2	1353.69	1.29464	44.0355	0
	High	SLFSSIGEVESAk	1	2	1	Q15717	K13(Lys8)	0	393382				0.001	0.005837	17.59	4.81174	2	1361.7	0.093112	44.0411	0
C9J0A5	E3 ubiquitin-protein ligase BRE1A (Fragment) OS=Homo sapiens GN=RNF20 PE=1 SV=1 - [C9J0A5_HUMAN]	72.84	12.41	3	2	2	8	3.38874e+06	0.649717	5	5.89131	145	16.3824	4.85596
	A2	Sequence	# PSMs	# Proteins	# Protein Groups	Protein Group Accessions	Modifications	ΔCn	Area	Heavy/Light	Heavy/Light Count	Heavy/Light Variability [%]	q-Value	PEP	IonScore	Exp Value	Charge	MH+ [Da]	ΔM [ppm]	RT [min]	# Missed Cleavages
	High	ALVVPEPEPDSDsNQEr	4	3	1	C9J0A5	S13(Phospho); R17(Arg10)	0	3.62826e+06	0.585379	2	15.553	0	4.266e-10	46.94	0.00793226	2	1971.86	0.151215	34.6739	0
	High	ALVVPEPEPDSDsNQER	2	3	1	C9J0A5	S13(Phospho)	0	5.96334e+06	0.676031	1		0	2.538e-06	38.19	0.0591498	2	1961.85	-0.175324	34.6324	0
	High	KALVVPEPEPDsDSNQER	2	3	1	C9J0A5	S12(Phospho)	0	814131	0.636188	2	5.0876	0	0.0009484	22.42	2.91295	2	2089.95	2.34731	30.0242	1
Q12906-4	Isoform 4 of Interleukin enhancer-binding factor 3 OS=Homo sapiens GN=ILF3 - [ILF3_HUMAN]	72.65	6.45	3	2	2	12	2.07137e+07	0.362596	6	3.14976	698	75.4608	8.41162
	A2	Sequence	# PSMs	# Proteins	# Protein Groups	Protein Group Accessions	Modifications	ΔCn	Area	Heavy/Light	Heavy/Light Count	Heavy/Light Variability [%]	q-Value	PEP	IonScore	Exp Value	Charge	MH+ [Da]	ΔM [ppm]	RT [min]	# Missed Cleavages
	High	GEDsAEETEAKPAVVAPAPVVEAVSTPSAAFPSDATAENVK	7	3	1	Q12906-4	S4(Phospho)	0	1.30923e+07	0.37077	3	2.95804	0	1.574e-10	43.73	0.0563826	3	4118.94	1.46149	48.8703	0
	High	DSSKGEDsAEETEAKPAVVAPAPVVEAVSTPSAAFPSDATAENVK	3	3	1	Q12906-4	S8(Phospho)	0	2.83352e+07	0.334374	2	9.03895	0	1.24e-07	35.83	0.364462	3	4536.11	-2.29371	47.0095	1
	High	GEDsAEETEAkPAVVAPAPVVEAVSTPSAAFPSDATAENVk	1	3	1	Q12906-4	S4(Phospho); K11(Lys8); K41(Lys8)	0	1.74603e+06				0	5.67e-06	19.9	12.8265	3	4134.95	-2.01698	48.8769	0
	High	DSskGEDSAEETEAkPAVVAPAPVVEAVSTPSAAFPSDATAENVk	1	3	1	Q12906-4	S3(Phospho); K4(Lys8); K15(Lys8); K45(Lys8)	0	2.06393e+06	0.361747	1		0.008	0.07215	13.25	62.3022	3	4560.15	-3.27086	47.3933	1
Q9H1E3	Nuclear ubiquitous casein and cyclin-dependent kinase substrate 1 OS=Homo sapiens GN=NUCKS1 PE=1 SV=1 - [NUCKS_HUMAN]	68.4091	8.23	1	2	2	9	1.50638e+06	1.10689	6	1.34668	243	27.28	5.08447
	A2	Sequence	# PSMs	# Proteins	# Protein Groups	Protein Group Accessions	Modifications	ΔCn	Area	Heavy/Light	Heavy/Light Count	Heavy/Light Variability [%]	q-Value	PEP	IonScore	Exp Value	Charge	MH+ [Da]	ΔM [ppm]	RT [min]	# Missed Cleavages
	High	VVDYSQFQEsDDADEDYGR	3	1	1	Q9H1E3	S10(Phospho)	0	1.42187e+06	1.10532	2	1.34668	0	4.765e-12	36.1	0.0470199	2	2317.88	0.0208914	35.7111	0
	High	VVDYSQFQEsDDADEDYGr	3	1	1	Q9H1E3	S10(Phospho); R19(Arg10)	0	1.79184e+06	1.10465	1		0	1.709e-11	31.58	0.144287	2	2327.89	2.23686	35.7202	0
	High	KVVDYSQFQEsDDADEDYGR	3	1	1	Q9H1E3	S11(Phospho)	0	1.22092e+06	1.10914	3	24.1604	0.001	0.01232	19.59	3.83388	2	2445.97	1.01822	33.5537	1
O00567	Nucleolar protein 56 OS=Homo sapiens GN=NOP56 PE=1 SV=4 - [NOP56_HUMAN]	67.5367	4.55	1	2	2	8	2.99924e+06	0.809114	5	4.70919	594	66.0087	9.18799
	A2	Sequence	# PSMs	# Proteins	# Protein Groups	Protein Group Accessions	Modifications	ΔCn	Area	Heavy/Light	Heavy/Light Count	Heavy/Light Variability [%]	q-Value	PEP	IonScore	Exp Value	Charge	MH+ [Da]	ΔM [ppm]	RT [min]	# Missed Cleavages
	High	EELmSsDLEETAGSTSIPk	2	1	1	O00567	M4(Oxidation); S6(Phospho); K19(Lys8)	0	1.30872e+06	0.76167	2	8.97687	0	0.0007341	18.29	6.15467	2	2127.92	2.74287	37.8038	0
	High	EELmSsDLEETAGSTSIPK	3	1	1	O00567	M4(Oxidation); S6(Phospho)	0	2.84201e+06	0.650204	1		0	0.0003507	12.25	22.5399	2	2119.91	3.0019	37.618	0
	High	VVSLSEYR	2	1	1	O00567		0	3.15647e+06	0.829484	2	1.02039	0.004	0.03107	51.51	0.000842637	2	952.51	-0.360366	28.9734	0
	High	VVSLSEYr	1	1	1	O00567	R8(Arg10)	0	2.23402e+06				0.008	0.07511	38.43	0.0193145	2	962.518	0.0568718	28.9471	0
P49736	DNA replication licensing factor MCM2 OS=Homo sapiens GN=MCM2 PE=1 SV=4 - [MCM2_HUMAN]	66.82	2.99	1	2	2	8	3.25677e+06	0.756791	5	17.9236	904	101.832	5.51611
	A2	Sequence	# PSMs	# Proteins	# Protein Groups	Protein Group Accessions	Modifications	ΔCn	Area	Heavy/Light	Heavy/Light Count	Heavy/Light Variability [%]	q-Value	PEP	IonScore	Exp Value	Charge	MH+ [Da]	ΔM [ppm]	RT [min]	# Missed Cleavages
	High	GLLYDsDEEDEERPAR	3	1	1	P49736	S6(Phospho)	0	2.12868e+06	0.70866	3	8.05267	0	1.419e-07	50	0.0029465	2	1973.81	0.512643	32.7088	0
	High	GNDPLTSsPGr	1	1	1	P49736	S8(Phospho); R11(Arg10)	0	2.53223e+06	0.756791	1		0	0.0003885	32.95	0.0591912	2	1190.51	0.210724	23.5709	0
	High	GLLYDsDEEDEErPAr	2	1	1	P49736	S6(Phospho); R13(Arg10); R16(Arg10)	0	1.0669e+06				0	0.002382	19.16	3.66565	2	1993.83	0.29448	32.5938	0
	High	GNDPLtSSPGR	2	1	1	P49736	T6(Phospho)	0	4.38486e+06	0.902852	1		0.008	0.07698	32.85	0.0553041	2	1180.5	-0.641657	23.4855	0
P67809	Nuclease-sensitive element-binding protein 1 OS=Homo sapiens GN=YBX1 PE=1 SV=3 - [YBOX1_HUMAN]	66.68	21.91	2	4	4	14	3.58787e+06	0.804381	9	16.272	324	35.9027	9.87646
	A2	Sequence	# PSMs	# Proteins	# Protein Groups	Protein Group Accessions	Modifications	ΔCn	Area	Heavy/Light	Heavy/Light Count	Heavy/Light Variability [%]	q-Value	PEP	IonScore	Exp Value	Charge	MH+ [Da]	ΔM [ppm]	RT [min]	# Missed Cleavages
	High	GAEAANVTGPGGVPVQGSK	3	2	1	P67809		0	1.23698e+06	0.721286	3	4.20905	0	2.142e-12	44.2	0.0146145	2	1695.87	1.79667	26.7229	0
	High	NYQQNYQNSEsGEKNEGSESAPEGQAQQR	3	2	1	P67809	S11(Phospho)	0	2.15416e+06	0.972726	2	7.99125	0	1.833e-05	27.47	1.25754	3	3337.37	1.86593	22.7785	1
	High	EDGNEEDkENQGDETQGQQPPQr	1	2	1	P67809	K8(Lys8); R23(Arg10)	0	3.51228e+06	0.784944	1		0	5.663e-07	19.51	6.93212	3	2646.13	1.05414	17.1563	1
	High	NYQQNYQNSESGEKNEGSESAPEGQAQQR	1	2	1	P67809		0	686260	0.938969	1		0	0.001354	19.08	10.953	3	3257.39	-0.517242	22.1995	1
	High	GAEAANVTGPGGVPVQGSk	1	2	1	P67809	K19(Lys8)	0	769783				0	0.0004156	17.07	7.19572	2	1703.88	1.19229	26.7354	0
	High	EDGNEEDKENQGDETQGQQPPQR	1	2	1	P67809		0	5.20749e+06				0	0.00337	13.31	27.0779	3	2628.11	1.38919	17.1501	1
	High	NYQQNYQNSESGEkNEGsESAPEGQAQQr	2	2	1	P67809	K14(Lys8); S18(Phospho); R29(Arg10)	0	3.16342e+06	0.80732	1		0.002	0.0144	16.55	17.1825	3	3355.39	1.38086	22.3938	1
	High	NEGSEsAPEGQAQQR	1	2	1	P67809	S6(Phospho)	0	2.39271e+06				0.003	0.02478	10.1	16.5739	2	1667.67	0.686837	16.8866	0
	High	NEGsESAPEGQAQQr	1	2	1	P67809	S4(Phospho); R15(Arg10)	0	955347	0.757472	1		0.007	0.05477	10.4	15.5863	2	1677.68	1.86587	16.3879	0
P14625	Endoplasmin OS=Homo sapiens GN=HSP90B1 PE=1 SV=1 - [ENPL_HUMAN]	65.39	4.61	1	2	3	8	851538	1.16173	7	30.6425	803	92.4113	4.84326
	A2	Sequence	# PSMs	# Proteins	# Protein Groups	Protein Group Accessions	Modifications	ΔCn	Area	Heavy/Light	Heavy/Light Count	Heavy/Light Variability [%]	q-Value	PEP	IonScore	Exp Value	Charge	MH+ [Da]	ΔM [ppm]	RT [min]	# Missed Cleavages
	High	ELISNASDALDK	3	2	2	P08238;P14625		0	1.17793e+06	1.53504	3	21.0397	0	4.093e-05	37.36	0.0447381	2	1275.65	3.44219	32.5136	0
	High	GVVDSDDLPLNVSR	1	1	1	P14625		0	393411	0.994061	1		0	5.56e-10	29.3	0.35758	2	1485.76	1.1508	39.052	0
	High	SILFVPTSAPR	1	1	1	P14625		0	777481	1.40522	1		0.001	0.004916	39.71	0.0169178	2	1187.68	0.248523	41.3936	0
	High	SILFVPTSAPr	3	1	1	P14625	R11(Arg10)	0	983277	1.05009	2	15.0632	0.001	0.008712	17.18	2.81683	2	1197.69	0.78259	41.4086	0
Q9Y2W1	Thyroid hormone receptor-associated protein 3 OS=Homo sapiens GN=THRAP3 PE=1 SV=2 - [TR150_HUMAN]	63.8633	7.85	1	5	5	13	6.96363e+06	0.804035	10	18.4647	955	108.601	10.1548
	A2	Sequence	# PSMs	# Proteins	# Protein Groups	Protein Group Accessions	Modifications	ΔCn	Area	Heavy/Light	Heavy/Light Count	Heavy/Light Variability [%]	q-Value	PEP	IonScore	Exp Value	Charge	MH+ [Da]	ΔM [ppm]	RT [min]	# Missed Cleavages
	High	GSFsDTGLGDGK	1	1	1	Q9Y2W1	S4(Phospho)	0	1.71943e+06	0.884985	1		0	2.659e-06	31.49	0.0829142	2	1220.48	0.740762	28.8102	0
	High	FSGEEGEIEDDEsGTENR	1	1	1	Q9Y2W1	S13(Phospho)	0	984115	0.876652	1		0	0.001174	27.22	0.279005	2	2079.77	1.78137	28.0413	0
	High	ERsPALKsPLQSVVVR	3	1	1	Q9Y2W1	S3(Phospho); S8(Phospho)	0	1.72451e+07	0.684239	3	4.9964	0	0.0003773	23.86	1.9176	3	1925.96	0.628304	36.4871	2
	High	FSGEEGEIEDDEsGTENr	1	1	1	Q9Y2W1	S13(Phospho); R18(Arg10)	0	1.34523e+06	1.09331	1		0	2.935e-11	23.14	0.647375	2	2089.78	0.736608	28.0479	0
	High	ASAVSELsPr	2	1	1	Q9Y2W1	S8(Phospho); R10(Arg10)	0	1.10651e+06	0.759278	1		0.001	0.005061	31.84	0.097639	2	1106.51	-0.0967198	26.1251	0
	High	ASAVSELsPR	3	1	1	Q9Y2W1	S8(Phospho)	0	1.9264e+06	0.891264	2	6.78682	0.001	0.01314	27.54	0.246324	2	1096.5	0.318721	25.473	0
	High	SPVGKsPPSTGSTYGSSQK	1	1	1	Q9Y2W1	S6(Phospho)	0	850533	0.625994	1		0.001	0.009419	15.67	11.5061	2	1931.88	2.01635	22.3374	1
	High	GSFsDTGLGDGk	1	1	1	Q9Y2W1	S4(Phospho); K12(Lys8)	0	1.43578e+06				0.007	0.05292	19.6	1.18968	2	1228.5	0.903041	28.8644	0
H3BQZ7	HCG2044799 OS=Homo sapiens GN=HNRNPUL2-BSCL2 PE=4 SV=1 - [H3BQZ7_HUMAN]	63.8067	3.08	2	3	3	9	1.30113e+07	0.621763	5	16.3545	746	84.6392	4.93213
	A2	Sequence	# PSMs	# Proteins	# Protein Groups	Protein Group Accessions	Modifications	ΔCn	Area	Heavy/Light	Heavy/Light Count	Heavy/Light Variability [%]	q-Value	PEP	IonScore	Exp Value	Charge	MH+ [Da]	ΔM [ppm]	RT [min]	# Missed Cleavages
	High	REEDEPEERsGDETPGSEVPGDK	1	2	1	H3BQZ7	S10(Phospho)	0	4.96867e+06	0.621763	1		0	1.575e-06	39.79	0.0477122	3	2624.07	1.49446	23.3203	2
	High	sGDETPGSEVPGDk	2	2	1	H3BQZ7	S1(Phospho); K14(Lys8)	0	1.94848e+07	0.69377	1		0	2.412e-05	33.74	0.0515233	2	1462.58	0.761982	22.5199	0
	High	sGDETPGSEVPGDK	2	2	1	H3BQZ7	S1(Phospho)	0	3.1206e+07	0.716408	1		0	0.0003385	30.97	0.0944204	2	1454.57	0.708963	22.8534	0
	High	rEEDEPEErsGDETPGSEVPGDk	1	2	1	H3BQZ7	R1(Arg10); R9(Arg10); S10(Phospho); K23(Lys8)	0	2.69003e+06				0	4.595e-05	24.81	1.64062	3	2652.1	0.843594	23.3264	2
	High	EEDEPEErsGDETPGSEVPGDk	2	2	1	H3BQZ7	R8(Arg10); S9(Phospho); K22(Lys8)	0	1.56119e+06	0.519236	1		0	0.0002228	24.55	1.26499	3	2485.99	1.54394	24.7574	1
	High	EEDEPEERsGDETPGSEVPGDK	1	2	1	H3BQZ7	S9(Phospho)	0	2.85914e+06	0.606706	1		0.002	0.01443	13.91	12.1608	3	2467.96	0.791414	25.2824	1
A0A087WV66	Antigen KI-67 OS=Homo sapiens GN=MKI67 PE=1 SV=1 - [A0A087WV66_HUMAN]	63.04	1.11	2	2	2	10	4.88898e+06	0.727782	7	26.27	3255	358.407	9.42236
	A2	Sequence	# PSMs	# Proteins	# Protein Groups	Protein Group Accessions	Modifications	ΔCn	Area	Heavy/Light	Heavy/Light Count	Heavy/Light Variability [%]	q-Value	PEP	IonScore	Exp Value	Charge	MH+ [Da]	ΔM [ppm]	RT [min]	# Missed Cleavages
	High	SGGSGHAVAEPAsPEQELDQNK	4	2	1	A0A087WV66	S13(Phospho)	0	4.35626e+06	0.681438	3	0.767625	0	9.459e-10	41.5	0.0334611	3	2287.99	1.85812	29.1622	0
	High	TPVQYSQQQNsPQK	2	2	1	A0A087WV66	S11(Phospho)	0	5.4217e+06	0.948185	1		0	0.0004988	40.81	0.0251362	2	1712.77	1.62248	20.4751	0
	High	SGGSGHAVAEPAsPEQELDQNk	2	2	1	A0A087WV66	S13(Phospho); K22(Lys8)	0	2607131	0.727782	1		0	2.735e-07	22.25	3.00988	3	2296	2.63222	28.4308	0
	High	TPVQYSQQQNsPQk	2	2	1	A0A087WV66	S11(Phospho); K14(Lys8)	0	4.22718e+06	0.876929	2	1.80638	0.003	0.02417	17.05	6.54647	2	1720.78	1.45047	20.0656	0
Q12873-2	Isoform 2 of Chromodomain-helicase-DNA-binding protein 3 OS=Homo sapiens GN=CHD3 - [CHD3_HUMAN]	60.0614	1.78	3	2	2	10	3.21255e+06	0.639705	6	4.40427	1966	222.721	7.51807
	A2	Sequence	# PSMs	# Proteins	# Protein Groups	Protein Group Accessions	Modifications	ΔCn	Area	Heavy/Light	Heavy/Light Count	Heavy/Light Variability [%]	q-Value	PEP	IonScore	Exp Value	Charge	MH+ [Da]	ΔM [ppm]	RT [min]	# Missed Cleavages
	High	mETEADAPsPAPsLGER	3	3	1	Q12873-2	M1(Oxidation); S9(Phospho); S13(Phospho)	0	3.88775e+06	0.686335	3	10.8044	0	2.265e-07	32.27	0.0935636	2	1933.73	0.477604	28.7265	0
	High	ELQGDGPPSsPTNDPTVK	4	3	1	Q12873-2	S10(Phospho)	0	2.53735e+06	0.636233	3	1.58481	0	1.529e-06	24.88	1.23972	2	1918.84	0.945325	26.315	0
	High	ELQGDGPPSsPTNDPTVk	2	3	1	Q12873-2	S10(Phospho); K18(Lys8)	0	1.45291e+06				0	0.0003613	15.24	12.2623	2	1926.86	1.6181	26.8735	0
	High	mETEADAPsPAPsLGEr	1	3	1	Q12873-2	M1(Oxidation); S9(Phospho); S13(Phospho); R17(Arg10)	0	2.58247e+06				0	1.554e-08	12.51	8.28107	2	1943.74	0.742702	28.7913	0
A6NNK5	Tumor suppressor p53-binding protein 1 OS=Homo sapiens GN=TP53BP1 PE=1 SV=2 - [A6NNK5_HUMAN]	59.33	6.49	5	7	7	17	2.59719e+06	0.688973	12	22.7056	1927	208.89	4.66553
	A2	Sequence	# PSMs	# Proteins	# Protein Groups	Protein Group Accessions	Modifications	ΔCn	Area	Heavy/Light	Heavy/Light Count	Heavy/Light Variability [%]	q-Value	PEP	IonScore	Exp Value	Charge	MH+ [Da]	ΔM [ppm]	RT [min]	# Missed Cleavages
	High	IDEDGENTQIEDTEPmsPVLNSK	2	5	1	A6NNK5	M16(Oxidation); S17(Phospho)	0	1.37633e+06	0.549231	2	24.9109	0	5.863e-05	32	0.372959	2	2657.12	1.81046	33.7406	0
	High	NsPEDLGLSLTGDSck	3	5	1	A6NNK5	S2(Phospho); C15(Carbamidomethyl); K16(Lys8)	0	1.86924e+06	0.933344	3	6.52284	0	2.551e-07	31.82	0.187137	2	1780.76	2.22686	40.8689	0
	High	NsPEDLGLSLTGDScK	3	5	1	A6NNK5	S2(Phospho); C15(Carbamidomethyl)	0	2.28637e+06				0	0.000675	26.77	0.514584	2	1772.75	2.3277	40.7133	0
	High	mVIQGPSsPQGEAmVTDVLEDQKEGR	3	4	1	A6NNK5	M1(Oxidation); S8(Phospho); M14(Oxidation)	0	3.14609e+06	0.636427	2	4.88918	0	0.001161	20.37	7.93715	3	2913.3	0.716459	40.0079	1
	High	mVIQGPsSPQGEAmVTDVLEDQK	1	4	1	A6NNK5	M1(Oxidation); S7(Phospho); M14(Oxidation)	0	1.62134e+06	0.745118	1		0	4.855e-05	17.87	10.948	3	2571.14	2.17613	42.346	0
	High	STPFIVPsSPTEQEGR	2	5	1	A6NNK5	S8(Phospho)	0	2.35912e+06	0.639033	2	17.162	0.001	0.009964	16.45	8.42334	2	1811.82	0.0686388	37.7294	0
	High	SDsPEIPFQAAAGPSDGLDASSPGNSFVGLR	1	4	1	A6NNK5	S3(Phospho)	0	882326	0.662176	1		0.008	0.06747	10.26	92.3758	3	3126.41	1.41404	53.2312	0
	High	LmLSTSEysQSPK	1	5	1	A6NNK5	M2(Oxidation); Y8(Phospho); S9(Phospho)	0	1.50013e+06	1.02854	1		0.009	0.08634	13.02	7.06919	2	1646.64	1.35816	31.9247	0
	High	SDsPEIPFQAAAGPSDGLDASSPGNsFVGLR	1	4	1	A6NNK5	S3(Phospho); S26(Phospho)	0	0				0.009	0.08535	12.35	50.0376	3	3206.37	0.420005	55.3239	0
P35579-2	Isoform 2 of Myosin-9 OS=Homo sapiens GN=MYH9 - [MYH9_HUMAN]	58.76	1.74	2	3	3	7	1.03454e+07	0.962212	7	196.176	1382	159.764	5.97314
	A2	Sequence	# PSMs	# Proteins	# Protein Groups	Protein Group Accessions	Modifications	ΔCn	Area	Heavy/Light	Heavy/Light Count	Heavy/Light Variability [%]	q-Value	PEP	IonScore	Exp Value	Charge	MH+ [Da]	ΔM [ppm]	RT [min]	# Missed Cleavages
	High	kGAGDGsDEEVDGkADGAEAkPAE	3	2	1	P35579-2	K1(Lys8); S7(Phospho); K14(Lys8); K21(Lys8)	0	8.1429e+06	100	3	0	0	0.0008555	38.53	0.0752329	2	2407.04	1.88017	20.6985	2
	High	KGAGDGsDEEVDGKADGAEAKPAE	2	2	1	P35579-2	S7(Phospho)	0	2.68928e+07	0.0654723	2	4843.95	0	3.252e-05	18.6	6.26004	3	2383	1.02034	20.7862	2
	High	GAGDGsDEEVDGKADGAEAKPAE	1	2	1	P35579-2	S6(Phospho)	0	515534	0.979178	1		0	0.003872	18.25	4.19395	2	2254.9	0.975681	22.1218	1
	High	kGAGDGsDEEVDGk	1	2	1	P35579-2	K1(Lys8); S7(Phospho); K14(Lys8)	0	3.6277e+06	0.962212	1		0.003	0.0164	26.75	0.301172	2	1459.59	0.471821	15.2009	1
[truncated: 275 more rows]

## Sheet: Nuclear
Accession	Description	Score	Coverage	# Proteins	# Unique Peptides	# Peptides	# PSMs	Area	Heavy/Light	Heavy/Light Count	Heavy/Light Variability [%]	# AAs	MW [kDa]	calc. pI
[truncated: 612 more rows]

[truncated: 1 more sheets: Membrane]
