# Supplementary material for: Responsiveness to Hedgehog Pathway Inhibitors in T-Cell Acute Lymphoblastic Leukemia Cells Is Highly Dependent on 5′AMP-Activated Kinase Inactivation
Source: Int J Mol Sci. 2021 Jun 15;22(12):6384. doi: 10.3390/ijms22126384 (PMC8232330; doi:10.3390/ijms22126384)
Supplement: Supplementary file 1 [file ijms-22-06384-s001.zip › Supplementary Table S2_MIX_B_phosphopeptides_Total.xlsx]

## Sheet: Cytoplasmic
Accession	Description	Score	Coverage	# Proteins	# Unique Peptides	# Peptides	# PSMs	Area	Light/Heavy	Light/Heavy Count	Light/Heavy Variability [%]	# AAs	MW [kDa]	calc. pI
P68363	Tubulin alpha-1B chain OS=Homo sapiens GN=TUBA1B PE=1 SV=1 - [TBA1B_HUMAN]	1802.02	43.02	1	14	14	115	2.66054e+07	1.2185	54	17.483	451	50.1196	5.05908
	A2	Sequence	# PSMs	# Proteins	# Protein Groups	Protein Group Accessions	Modifications	ΔCn	Area	Light/Heavy	Light/Heavy Count	Light/Heavy Variability [%]	q-Value	PEP	IonScore	Exp Value	Charge	MH+ [Da]	ΔM [ppm]	RT [min]	# Missed Cleavages
	High	AVcmLSNTTAIAEAWAR	6	1	1	P68363	C3(Carbamidomethyl); M4(Oxidation)	0	1.41616e+07	1.0686	4	1.97834	0	3.583e-07	98.96	5.90118e-08	2	1880.9	1.18487	45.1876	0
	High	TIGGGDDSFNTFFSETGAGK	6	1	1	P68363		0	1.90427e+07	1.04022	2	3.80719	0	4.796e-05	98.64	5.91885e-08	2	2007.9	1.99264	47.0048	0
	High	TIGGGDDSFNTFFSETGAGk	8	1	1	P68363	K20(Lys8)	0	1.82649e+07	0.983819	3	1.78373	0	3.905e-06	87.45	8.19566e-07	2	2015.91	1.11771	46.8856	0
	High	AVcmLSNTTAIAEAWAr	7	1	1	P68363	C3(Carbamidomethyl); M4(Oxidation); R17(Arg10)	0	1.33091e+07	1.06216	2	2.33549	0	5.481e-06	83.05	2.26396e-06	2	1890.91	1.51819	45.0765	0
	High	AVFVDLEPTVIDEVR	8	1	1	P68363		0	2.24013e+07	1.34277	6	2.89693	0	0.0001125	73.43	1.46237e-05	2	1701.91	1.68499	51.3738	0
	High	EIIDLVLDR	3	1	1	P68363		0	8.6521e+06	1.07127	3	1.51612	0	0.0004884	68.12	2.33876e-05	2	1085.62	0.565426	47.7404	0
	High	DVNAAIATIk	3	1	1	P68363	K10(Lys8)	0	9.2956e+06	1.17892	2	4.57057	0	0.001216	67.35	2.08744e-05	2	1023.59	-0.153914	32.9542	0
	High	DVNAAIATIK	4	1	1	P68363		0	1.07628e+07	1.21773	1		0	0.008994	64.79	4.11217e-05	2	1015.58	0.303812	32.9652	0
	High	SIQFVDWcPTGFk	4	1	1	P68363	C8(Carbamidomethyl); K13(Lys8)	0	4.28364e+06	1.24613	2	3.23295	0	0.001449	53.49	0.0014882	2	1592.77	1.37976	49.9789	0
	High	EIIDLVLDr	3	1	1	P68363	R9(Arg10)	0	8.4036e+06				0	0.00467	53.34	0.000693548	2	1095.63	0.143605	47.7938	0
	High	SIQFVDWcPTGFK	4	1	1	P68363	C8(Carbamidomethyl)	0	5.17082e+06	1.29942	1		0	0.001584	51.19	0.00249539	2	1584.75	2.02747	50.0331	0
	High	DYEEVGVDSVEGEGEEEGEEY	3	1	1	P68363		0	2.53999e+07				0	1.722e-05	45.62	0.0074516	2	2348.91	1.61254	40.8023	0
	High	AVFVDLEPTVIDEVr	8	1	1	P68363	R15(Arg10)	0	1.70312e+07				0	0.001817	44.59	0.0104469	2	1711.92	1.33718	51.3653	0
	High	NLDIErPTYTNLNr	6	1	1	P68363	R6(Arg10); R14(Arg10)	0	1.88523e+07	1.2445	6	3.12407	0	0.02261	36.51	0.0848757	3	1738.9	0.40649	34.2097	0
	High	QLFHPEQLITGKEDAANNYAR	4	1	1	P68363		0	3.99308e+06	1.29235	4	3.6867	0	0.004794	35.63	0.174004	3	2415.21	2.80222	39.5327	1
	High	IHFPLATYAPVISAEK	6	1	1	P68363		0	5.94071e+06	1.40067	2	7.58782	0	0.00796	30.8	0.21027	2	1756.97	2.50299	47.5526	0
	High	TIGGGDDsFNTFFSETGAGK	3	1	1	P68363	S8(Phospho)	0	1.74971e+06	2.73758	2	1.82375	0	0.0008223	30.66	0.254526	2	2087.86	1.61326	48.2992	0
	High	IHFPLATYAPVISAEk	4	1	1	P68363	K16(Lys8)	0	4.22455e+06	1.31797	1		0	0.004849	27.37	0.4054	2	1764.98	2.60794	47.9186	0
	High	QLFHPEQLITGkEDAANNYAr	4	1	1	P68363	K12(Lys8); R21(Arg10)	0	3.12831e+06	1.08893	2	9.30965	0	0.001622	24.35	2.31884	3	2433.23	1.1481	39.563	1
	High	VGINYQPPTVVPGGDLAK	2	1	1	P68363		0	3.2015e+07	1.57327	2	4.47116	0	0.009919	22.05	1.99096	2	1824.99	1.87831	41.4183	0
	High	LDHkFDLmYAk	3	1	1	P68363	K4(Lys8); M8(Oxidation); K11(Lys8)	0	2.61812e+06	1.16737	2	15.0282	0	0.01363	18.23	4.22909	3	1412.72	0.0462931	29.667	1
	High	VGINYQPPTVVPGGDLAk	4	1	1	P68363	K18(Lys8)	0	2.09619e+07	1.59866	2	2.52593	0	0.009917	14.67	9.91165	2	1833	0.716782	41.2447	0
	High	TIGGGDDsFNTFFSETGAGk	2	1	1	P68363	S8(Phospho); K20(Lys8)	0	640000	2.3777	1		0.001	0.04452	31.94	0.218757	2	2095.88	3.45233	48.3349	0
	High	YmAccLLYr	2	1	1	P68363	M2(Oxidation); C4(Carbamidomethyl); C5(Carbamidomethyl); R9(Arg10)	0	3.5307e+06				0.001	0.03601	17.2	2.7734	2	1275.56	1.13305	34.9407	0
	High	YmAccLLYR	2	1	1	P68363	M2(Oxidation); C4(Carbamidomethyl); C5(Carbamidomethyl)	0	3.5524e+06	1.01444	2	4.36872	0.002	0.05167	34.86	0.0474695	2	1265.55	1.1169	34.6735	0
	High	NLDIERPTYTNLNR	3	1	1	P68363		0	2.1392e+07				0.002	0.05862	13.65	16.6912	3	1718.88	-0.229402	34.376	0
	High	FDLmYAk	1	1	1	P68363	M4(Oxidation); K7(Lys8)	0	1.14167e+06	1.03149	1		0.003	0.06256	12.3	8.42341	2	911.442	0.0703019	31.7577	0
	High	LDHKFDLmYAK	2	1	1	P68363	M8(Oxidation)	0	2.86675e+06	1.01071	1		0.004	0.06822	13.86	11.393	3	1396.69	0.430195	29.8352	1
P11142	Heat shock cognate 71 kDa protein OS=Homo sapiens GN=HSPA8 PE=1 SV=1 - [HSP7C_HUMAN]	1623.7	29.88	1	15	15	103	9.02721e+06	0.811379	55	12.9224	646	70.8542	5.51611
	A2	Sequence	# PSMs	# Proteins	# Protein Groups	Protein Group Accessions	Modifications	ΔCn	Area	Light/Heavy	Light/Heavy Count	Light/Heavy Variability [%]	q-Value	PEP	IonScore	Exp Value	Charge	MH+ [Da]	ΔM [ppm]	RT [min]	# Missed Cleavages
	High	TTPSYVAFTDTER	4	1	1	P11142		0	7.53376e+06	0.87955	2	2.12232	0	0.0002671	98.95	3.71736e-08	2	1487.7	1.00496	35.2612	0
	High	NSLESYAFNmk	4	1	1	P11142	M10(Oxidation); K11(Lys8)	0	3033762	0.84476	2	15.3248	0	0.001679	86.5	4.78751e-07	2	1327.61	0.154055	34.2408	0
	High	NSLESYAFNmK	3	1	1	P11142	M10(Oxidation)	0	2.94465e+06	0.94129	1		0	0.00206	80.19	2.00054e-06	2	1319.6	1.387	34.3441	0
	High	STAGDTHLGGEDFDNr	7	1	1	P11142	R16(Arg10)	0	6.94357e+06	0.757656	5	5.27067	0	9.032e-05	78.14	3.89256e-06	2	1701.73	0.576224	25.6605	0
	High	IINEPTAAAIAYGLDK	3	1	1	P11142		0	4.07692e+06	0.962337	1		0	0.0002347	73.58	1.26012e-05	2	1659.9	2.43888	44.3688	0
	High	DAGTIAGLNVLr	3	1	1	P11142	R12(Arg10)	0	8.0763e+06	0.857495	2	0.702376	0	0.0006223	71	1.33288e-05	2	1209.68	0.356041	42.3598	0
	High	DAGTIAGLNVLR	3	1	1	P11142		0	6.99697e+06	0.786163	1		0	0.0003301	69.01	2.11829e-05	2	1199.67	0.230767	42.1117	0
	High	IINEPTAAAIAYGLDk	4	1	1	P11142	K16(Lys8)	0	4.34873e+06	0.92871	2	1.39631	0	4.136e-06	69	3.57409e-05	2	1667.91	0.72056	44.2659	0
	High	NQVAmNPTNTVFDAK	3	1	1	P11142	M5(Oxidation)	0	5.74561e+06	0.72806	1		0	0.0003183	66.84	7.28172e-05	2	1665.79	0.825556	31.471	0
	High	TTPSYVAFTDTEr	3	1	1	P11142	R13(Arg10)	0	8.46589e+06	0.889896	1		0	0.0005176	64.26	0.000111011	2	1497.71	1.26398	35.0798	0
	High	SQIHDIVLVGGSTR	6	1	1	P11142		0	3.04423e+06	0.773026	4	7.05609	0	0.0003894	63.23	0.000113177	2	1481.81	0.689541	33.2093	0
	High	SQIHDIVLVGGSTr	5	1	1	P11142	R14(Arg10)	0	3.51806e+06	0.832169	2	11.6184	0	0.0001056	58.09	0.00037071	2	1491.82	0.624392	33.0347	0
	High	FEELNADLFR	2	1	1	P11142		0	2.11361e+06	0.843932	2	12.7438	0	0.01586	54.21	0.000866924	2	1253.62	1.16464	44.8019	0
	High	NQVAmNPTNTVFDAk	4	1	1	P11142	M5(Oxidation); K15(Lys8)	0	7.37635e+06	0.789415	2	0.301562	0	8.665e-05	52.71	0.00197254	2	1673.8	0.214959	31.3218	0
	High	FEELNADLFr	3	1	1	P11142	R10(Arg10)	0	2.35738e+06	0.851207	1		0	0.01265	50.62	0.00201612	2	1263.63	0.794151	44.8519	0
	High	IINEPTAAAIAYGLDKK	2	1	1	P11142		0	5.5159e+06	0.846006	1		0	0.0006285	40.67	0.0197633	3	1787.99	0.311268	41.4149	1
	High	STAGDTHLGGEDFDNR	6	1	1	P11142		0	5.42571e+06	0.73502	1		0	0.0007689	38.9	0.0333979	2	1691.73	1.49889	25.7693	0
	High	IINEPTAAAIAYGLDkk	2	1	1	P11142	K16(Lys8); K17(Lys8)	0	5.82701e+06	0.802872	2	15.6405	0	0.006455	36.92	0.0384115	3	1804.02	0.468436	41.2934	1
	High	NQVAMNPTNTVFDAk	3	1	1	P11142	K15(Lys8)	0	1.11131e+06	0.972563	2	14.0105	0	0.0003542	36.7	0.0798956	2	1657.81	1.56774	36.2513	0
	High	LLQDFFNGk	2	1	1	P11142	K9(Lys8)	0	1.25276e+06	0.945818	2	32.9888	0	0.01334	31.31	0.143927	2	1089.58	-0.638726	42.537	0
	High	SFYPEEVSSmVLTk	5	1	1	P11142	M10(Oxidation); K14(Lys8)	0	3.5205e+06	0.752411	3	25.0618	0	0.009353	28.98	0.449993	2	1640.8	0.362982	41.827	0
	High	NQVAMNPTNTVFDAK	3	1	1	P11142		0	1.40643e+06	1.19632	1		0	0.005199	24.87	1.22857	2	1649.8	3.59665	36.095	0
	High	TVTNAVVTVPAYFNDSQr	7	1	1	P11142	R18(Arg10)	0	5.53541e+06	0.814494	5	6.1872	0	0.0004837	24.44	1.64729	2	1992.01	-0.229651	42.7772	0
	High	VEIIANDQGNr	3	1	1	P11142	R11(Arg10)	0	1.05394e+07	0.811379	1		0	0.005299	23.09	1.2339	2	1238.64	0.812506	22.8267	0
	High	VEIIANDQGNR	3	1	1	P11142		0	8.33785e+06	0.814334	2	2.51127	0	0.00605	22.33	1.32806	2	1228.63	0.793257	22.9064	0
	High	SINPDEAVAYGAAVQAAILSGDk	2	1	1	P11142	K23(Lys8)	0	219278	0.216927	2	1203.51	0	0.01975	21.21	3.77849	2	2268.17	5.7398	58.1146	0
	High	TVTNAVVTVPAYFNDSQR	3	1	1	P11142		0	4.55838e+06	0.80571	1		0	0.01303	18.53	6.47749	2	1982	0.676997	42.7835	0
	High	SFYPEEVSSmVLTK	2	1	1	P11142	M10(Oxidation)	0	3.30602e+06				0	0.01282	15.74	9.41934	2	1632.78	0.762364	41.9651	0
	High	SINPDEAVAYGAAVQAAILSGDK	1	1	1	P11142		0	286967	0.95314	1		0.002	0.04826	15.05	16.8199	2	2260.16	4.3731	58.1845	0
	High	mVNHFIAEFk	1	1	1	P11142	M1(Oxidation); K10(Lys8)	0	2.07183e+06	0.748359	1		0.004	0.06998	19.73	2.5002	2	1259.63	0.704627	34.3662	0
	High	mVNHFIAEFK	1	1	1	P11142	M1(Oxidation)	0	1.61796e+06	0.743677	1		0.005	0.09323	20.17	2.10449	2	1251.62	0.837703	34.5883	0
P07437	Tubulin beta chain OS=Homo sapiens GN=TUBB PE=1 SV=2 - [TBB5_HUMAN]	1590.56	40.09	1	4	15	94	1.87286e+07	1.13813	49	14.6735	444	49.639	4.89404
	A2	Sequence	# PSMs	# Proteins	# Protein Groups	Protein Group Accessions	Modifications	ΔCn	Area	Light/Heavy	Light/Heavy Count	Light/Heavy Variability [%]	q-Value	PEP	IonScore	Exp Value	Charge	MH+ [Da]	ΔM [ppm]	RT [min]	# Missed Cleavages
	High	mAVTFIGNSTAIQELFk	3	1	1	P07437	M1(Oxidation); K17(Lys8)	0	4.17257e+06	1.01347	1		0	1.193e-05	78.68	5.3984e-06	2	1893.99	1.48388	56.3364	0
	High	EIVHIQAGQcGNQIGAK	6	1	2	P07437;P68371	C10(Carbamidomethyl)	0	2.00703e+07	1.07622	4	1.80071	0	1.019e-05	77.69	7.54737e-06	2	1822.92	0.923157	29.0946	0
	High	ImNTFSVVPSPk	3	2	2	P68371;P07437	M2(Oxidation); K12(Lys8)	0	8.72958e+06	1.4276	1		0	1.896e-05	76.79	5.00702e-06	2	1343.71	0.724056	35.4172	0
	High	ISVYYNEATGGK	3	1	1	P07437		0	1.58272e+07	1.046	2	4.19879	0	0.0005464	74.82	7.71781e-06	2	1301.64	0.666715	29.2185	0
	High	LAVNmVPFPR	3	2	2	P68371;P07437	M5(Oxidation)	0	1.29922e+07	1.40029	1		0	0.0006003	73.04	9.75556e-06	2	1159.63	-0.0847776	38.4741	0
	High	ImNTFSVVPSPK	4	2	2	P68371;P07437	M2(Oxidation)	0	1.24624e+07	1.43539	2	3.27904	0	0.002541	72.49	1.3051e-05	2	1335.7	0.48331	35.4696	0
	High	EIVHIQAGQcGNQIGAk	6	1	2	P07437;P68371	C10(Carbamidomethyl); K17(Lys8)	0	1.82461e+07	1.09203	2	1.52928	0	3.494e-06	70.72	3.61978e-05	2	1830.94	1.56461	28.6482	0
	High	mAVTFIGNSTAIQELFK	4	1	1	P07437	M1(Oxidation)	0	4.36053e+06	1.04088	2	1.35284	0	1.311e-05	62.52	0.000216122	2	1885.98	3.06419	56.3327	0
	High	LAVNmVPFPr	3	2	2	P68371;P07437	M5(Oxidation); R10(Arg10)	0	9.34549e+06	1.37998	1		0	0.0002776	60.25	0.000170922	2	1169.64	0.464949	38.4024	0
	High	AILVDLEPGTmDSVr	3	1	1	P07437	M11(Oxidation); R15(Arg10)	0	1.18943e+07	1.36387	2	2.86407	0	0.0002132	56.01	0.000848318	2	1641.84	1.12481	41.1819	0
	High	LAVNMVPFPr	3	2	2	P68371;P07437	R10(Arg10)	0	1.00227e+06	1.15434	3	6.00297	0	0.002263	53.48	0.000729436	2	1153.64	0.507761	43.9252	0
	High	ISVYYNEATGGk	4	1	1	P07437	K12(Lys8)	0	1.46283e+07	1.13655	1		0	0.0009138	53.18	0.00117709	2	1309.65	0.819392	29.2129	0
	High	YLTVAAVFr	3	2	2	P68371;P07437	R9(Arg10)	0	2.9459e+06	0.934605	1		0	0.007082	50.65	0.00117999	2	1049.6	-0.297514	44.5622	0
	High	FPGQLNADLr	3	2	2	P68371;P07437	R10(Arg10)	0	9.0933e+06	2.06922	2	97.3864	0	0.005804	42.27	0.0109395	2	1140.6	0.493839	35.1148	0
	High	AILVDLEPGTmDSVR	4	1	1	P07437	M11(Oxidation)	0	1.56309e+07	1.34728	1		0	0.0004574	42.26	0.0201227	2	1631.83	1.56106	41.1354	0
	High	EVDEQMLNVQNK	3	2	2	P68371;P07437		0	3.47806e+06	1.16395	2	3.32719	0	0.01766	42.21	0.0174911	2	1446.69	0.497532	30.5026	0
	High	IMNTFSVVPSPK	3	2	2	P68371;P07437		0	1.84734e+06	1.64615	2	2.27907	0	0.01057	41.65	0.0164891	2	1319.7	1.35344	39.3674	0
	High	NSSYFVEWIPNNVk	3	2	2	P68371;P07437	K14(Lys8)	0	5.09303e+06	1.23182	2	6.16855	0	0.001925	40.57	0.0355975	2	1704.85	1.36939	49.1743	0
	High	YLTVAAVFR	3	2	2	P68371;P07437		0	2.80505e+06	0.935314	2	9.96327	0	0.001368	40.46	0.0151295	2	1039.59	0.843262	44.3985	0
	High	ALTVPELTQQVFDAK	2	1	1	P07437		0	20288204	1.3022	1		0	0.0006574	40.26	0.0277434	2	1659.9	1.62993	50.8328	0
	High	ISEQFTAmFr	2	2	2	P68371;P07437	M8(Oxidation); R10(Arg10)	0	1.24034e+06	1.06577	2	0.623596	0	0.007749	39.82	0.0224515	2	1255.6	0.619002	36.0945	0
	High	FPGQLNADLR	2	2	2	P68371;P07437		0	10949611	1.58225	1		0	0.008245	39.12	0.024278	2	1130.6	0.470101	34.85	0
	High	EVDEQMLNVQNk	3	2	2	P68371;P07437	K12(Lys8)	0	3.05594e+06	1.1049	1		0	0.01189	33	0.154666	2	1454.7	0.719832	30.3671	0
	High	NSSYFVEWIPNNVK	4	2	2	P68371;P07437		0	6.58532e+06	1.20297	1		0	0.006951	32.52	0.216822	2	1696.83	0.82323	49.2326	0
	High	EVDEQmLNVQNk	3	2	2	P68371;P07437	M6(Oxidation); K12(Lys8)	0	6.67229e+06	1.10664	3	0.517195	0	0.02296	29.18	0.353588	2	1470.7	0.434473	23.7617	0
	High	TAVcDIPPR	4	2	2	P68371;P07437	C4(Carbamidomethyl)	0	1.89068e+06	1.62963	1		0	0.01324	28.68	0.257825	2	1028.52	0.178459	26.1491	0
	High	mrEIVHIQAGQcGNQIGAk	2	1	2	P07437;P68371	M1(Oxidation); R2(Arg10); C12(Carbamidomethyl); K19(Lys8)	0	2.60365e+06	1.07584	2	26.0791	0	0.008315	23.92	2.15832	3	2144.08	0.0639445	28.1925	1
	High	EVDEQmLNVQNK	1	2	2	P68371;P07437	M6(Oxidation)	0	6.59323e+06				0	0.02302	23.04	1.33633	2	1462.69	0.546866	23.7006	0
	High	LHFFmPGFAPLTSr	2	2	2	P68371;P07437	M5(Oxidation); R14(Arg10)	0	897038	1.32788	2	32.6064	0	0.008089	15.09	11.4666	2	1646.84	1.40679	47.9272	0
	High	IMNTFSVVPSPk	1	2	2	P68371;P07437	K12(Lys8)	0	856578	1.5135	1		0.001	0.04608	39.08	0.0283835	2	1327.72	2.51123	39.1027	0
	High	ALTVPELTQQVFDAk	1	1	1	P07437	K15(Lys8)	0	1.5235e+07				0.001	0.04017	23.79	1.15238	2	1667.91	1.45243	50.8389	0
P08238	Heat shock protein HSP 90-beta OS=Homo sapiens GN=HSP90AB1 PE=1 SV=4 - [HS90B_HUMAN]	1590.4	30.52	1	12	19	105	8.37815e+07	0.892373	57	10.655	724	83.2121	5.03369
	A2	Sequence	# PSMs	# Proteins	# Protein Groups	Protein Group Accessions	Modifications	ΔCn	Area	Light/Heavy	Light/Heavy Count	Light/Heavy Variability [%]	q-Value	PEP	IonScore	Exp Value	Charge	MH+ [Da]	ΔM [ppm]	RT [min]	# Missed Cleavages
	High	NPDDITQEEYGEFYk	3	1	1	P08238	K15(Lys8)	0	8.54533e+06	0.939158	3	3.55601	0	4.93e-05	81.18	2.58078e-06	2	1855.81	2.00381	38.4343	0
	High	ELISNASDALDK	3	1	1	P08238		0	5.93112e+06	0.797487	3	2.52591	0	0.001113	71.69	1.63345e-05	2	1275.64	0.762796	32.4188	0
	High	ELISNASDALDk	1	1	1	P08238	K12(Lys8)	0	7.43726e+06				0	0.0002334	71.05	1.78994e-05	2	1283.66	0.252296	32.4133	0
	High	NPDDITQEEYGEFYK	4	1	1	P08238		0	7.07827e+06				0	4.707e-06	70.93	2.59849e-05	2	1847.8	2.36384	38.4281	0
	High	SLTNDWEDHLAVk	7	3	2	P07900;P08238	K13(Lys8)	0	4.70557e+06	0.943873	5	14.9236	0	0.0008521	63.3	0.00015599	2	1535.76	0.505523	38.5036	0
	High	LVSSPccIVTSTYGWTANmEr	7	1	1	P08238	C6(Carbamidomethyl); C7(Carbamidomethyl); M19(Oxidation); R21(Arg10)	0	3.09353e+06	0.949002	3	0.862687	0	7.92e-05	60.51	0.000621774	2	2458.11	0.84351	45.9921	0
	High	SIYYITGESK	3	1	1	P08238		0	5.16769e+06	0.860419	2	0.769919	0	0.01256	60.26	0.000173025	2	1160.58	0.858951	31.2001	0
	High	ELISNASDALDKIR	1	1	1	P08238		0	879574	1.03497	1		0	0.004296	58.1	0.000430339	2	1544.83	-0.719482	39.5488	1
	High	ADLINNLGTIAk	3	3	2	P07900;P08238	K12(Lys8)	0	1.83007e+07	0.813478	1		0	0.001262	55.07	0.000469558	2	1250.72	0.422158	41.03	0
	High	SLTNDWEDHLAVK	7	3	2	P07900;P08238		0	4.20048e+06	0.849698	1		0	0.0005749	54.33	0.00113239	2	1527.75	1.33262	38.5098	0
	High	ADLINNLGTIAK	3	3	2	P07900;P08238		0	1.51568e+07	0.838662	2	1.86022	0	0.002912	53.03	0.000814796	2	1242.71	0.750826	40.9135	0
	High	EDQTEYLEEr	2	3	2	P07900;P08238	R10(Arg10)	0	7.19765e+06	0.922853	2	2.53878	0	0.00415	49.4	0.00198114	2	1321.58	0.787642	26.1036	0
	High	YESLTDPSKLDSGK	3	3	2	P07900;P08238		0	2.41254e+06	1.01862	2	3.29691	0	0.007331	47.85	0.00514981	2	1539.76	1.87568	28.6057	1
	High	IEDVGsDEEDDSGK	1	1	1	P08238	S6(Phospho)	0	5.5434e+07	0.833552	1		0	0.000225	47.03	0.00166845	2	1574.58	1.02946	20.4068	0
	High	EGLELPEDEEEk	2	3	2	P07900;P08238	K12(Lys8)	0	3.53851e+06	1.06078	2	3.7116	0	0.006876	46.04	0.00599441	2	1424.65	0.316603	32.5343	0
	High	HLEINPDHPIVETLr	2	1	1	P08238	R15(Arg10)	0	2.94747e+06	1.08827	2	9.88686	0	0.0008166	45.41	0.00962202	3	1792.96	-0.481231	37.0231	0
	High	ELISNASDALDkIr	3	1	1	P08238	K12(Lys8); R14(Arg10)	0	849856	0.919384	2	10.3027	0	0.01139	44.85	0.00794456	2	1562.85	0.455909	39.5181	1
	High	EQVANSAFVER	3	1	1	P08238		0	8.16302e+06	0.844356	2	0.764307	0	0.01446	41.61	0.0154648	2	1249.62	0.613164	26.303	0
	High	YHTSQSGDEmTSLSEYVSr	6	1	1	P08238	M10(Oxidation); R19(Arg10)	0	4.74947e+06	0.83066	3	13.6949	0	4.716e-06	41.58	0.0327113	2	2202.95	2.39024	31.8395	0
	High	HLEINPDHPIVETLR	3	1	1	P08238		0	3.42829e+06	0.989735	1		0	0.005095	41.01	0.0266043	3	1782.95	0.182896	37.1547	0
	High	GFEVVYmTEPIDEYcVQQLK	1	1	1	P08238	M7(Oxidation); C15(Carbamidomethyl)	0	626027	0.785448	1		0	0.0005326	39.64	0.078076	2	2464.14	1.1851	48.1256	0
	High	SIYYITGESk	3	1	1	P08238	K10(Lys8)	0	5.66106e+06	0.912848	1		0	0.007592	38.76	0.025711	2	1168.6	0.401986	31.2401	0
	High	EQVANSAFVEr	3	1	1	P08238	R11(Arg10)	0	9.49364e+06	0.874656	1		0	0.00863	38.24	0.0319958	2	1259.63	0.439703	26.2976	0
	High	YHTSQSGDEmTSLSEYVSR	5	1	1	P08238	M10(Oxidation)	0	3.76063e+06	0.534353	2	45.5298	0	0.0006625	38.09	0.0631356	3	2192.94	-0.597559	31.7701	0
	High	IDIIPNPQER	1	1	1	P08238		0	8.25378e+06	1.06948	1		0	0.00953	37.84	0.033241	2	1194.65	0.290954	35.5581	0
	High	IEDVGsDEEDDSGkDk	2	1	1	P08238	S6(Phospho); K14(Lys8); K16(Lys8)	0	1.6314e+08	0.841288	1		0	0.0167	35.66	0.0489095	2	1833.73	1.38956	20.0979	1
	High	EDQTEYLEER	2	3	2	P07900;P08238		0	6.75707e+06	0.939749	1		0	0.01095	35.17	0.0499009	2	1311.57	0.397134	26.3141	0
	High	YESLTDPSK	2	3	2	P07900;P08238		0	5.16805e+06	1.02151	2	1.80932	0	0.01377	34.93	0.0430631	2	1039.49	-0.187732	22.2181	0
	High	LVSSPccIVTSTYGWTANmER	7	1	1	P08238	C6(Carbamidomethyl); C7(Carbamidomethyl); M19(Oxidation)	0	2.9529e+06	0.911438	3	4.39058	0	0.0009287	34.6	0.238052	2	2448.11	3.42686	45.9973	0
	High	YIDQEELNK	2	3	2	P07900;P08238		0	10984291	0.904037	2	1.92538	0	0.01555	32.81	0.093515	2	1151.56	-0.125433	23.7783	0
	High	IEDVGsDEEDDSGk	3	1	1	P08238	S6(Phospho); K14(Lys8)	0	69903541	0.828673	2	1.06839	0	0.007274	29.14	0.120253	2	1582.59	-0.00302985	19.7697	0
	High	EGLELPEDEEEK	1	3	2	P07900;P08238		0	3.69364e+06				0	0.009872	26.06	0.517038	2	1416.64	0.0873064	32.5576	0
	High	GFEVVYmTEPIDEYcVQQLk	1	1	1	P08238	M7(Oxidation); C15(Carbamidomethyl); K20(Lys8)	0	754387				0	0.01176	26.03	1.86945	2	2472.16	0.770526	48.1496	0
	High	YESLTDPSkLDSGk	3	3	2	P07900;P08238	K9(Lys8); K14(Lys8)	0	2.42169e+06	0.944943	1		0	0.02116	25.28	0.961495	2	1555.78	0.237181	28.5705	1
	High	IEDVGsDEEDDSGKDK	1	1	1	P08238	S6(Phospho)	0	1.55829e+07	0.829905	1		0.001	0.04182	28.05	0.221382	3	1817.7	0.329076	18.6134	1
	High	YESLTDPSk	1	3	2	P07900;P08238	K9(Lys8)	0	4.4339e+06				0.005	0.07647	14.54	4.93591	2	1047.51	-0.456446	21.413	0
P06733	Alpha-enolase OS=Homo sapiens GN=ENO1 PE=1 SV=2 - [ENOA_HUMAN]	1407.66	31.8	1	10	10	84	1.59012e+07	1.05111	38	8.4595	434	47.1393	7.38623
	A2	Sequence	# PSMs	# Proteins	# Protein Groups	Protein Group Accessions	Modifications	ΔCn	Area	Light/Heavy	Light/Heavy Count	Light/Heavy Variability [%]	q-Value	PEP	IonScore	Exp Value	Charge	MH+ [Da]	ΔM [ppm]	RT [min]	# Missed Cleavages
	High	DATNVGDEGGFAPNILENK	7	1	1	P06733		0	1.96301e+07	1.07804	4	3.28729	0	7.766e-06	97.92	8.25341e-08	2	1960.93	1.77924	42.1936	0
	High	GNPTVEVDLFTSK	3	1	1	P06733		0	6.37261e+06	1.05124	2	2.50476	0	0.0002532	90.37	2.68061e-07	2	1406.72	0.595226	41.317	0
	High	VVIGmDVAASEFFR	4	1	1	P06733	M5(Oxidation)	0	3.569e+06	1.03035	3	4.33416	0	0.0001062	77.18	6.40989e-06	2	1556.78	1.51766	46.8514	0
	High	LAmQEFmILPVGAANFr	5	1	1	P06733	M3(Oxidation); M7(Oxidation); R17(Arg10)	0	8.41302e+06	1.03666	4	7.14538	0	1.353e-06	75.67	1.2452e-05	2	1949.99	1.64648	50.4414	0
	High	GNPTVEVDLFTSk	4	1	1	P06733	K13(Lys8)	0	5.96047e+06	1.05988	1		0	0.001725	67.73	4.65573e-05	2	1414.73	1.34096	41.4027	0
	High	YISPDQLADLYK	4	1	1	P06733		0	1.77434e+07	1.07446	2	1.99159	0	3.579e-05	66.79	5.68447e-05	2	1425.73	1.1555	45.1937	0
	High	VVIGmDVAASEFFr	3	1	1	P06733	M5(Oxidation); R14(Arg10)	0	4.05548e+06				0	0.0005612	63.13	0.000164114	2	1566.79	0.515407	46.8249	0
	High	AAVPSGASTGIYEALELR	6	1	1	P06733		0	6.22004e+06	1.20455	4	3.79512	0	2.811e-06	62.2	0.000216018	2	1804.95	0.86592	48.1102	0
	High	AAVPSGASTGIYEALELr	6	1	1	P06733	R18(Arg10)	0	5.592e+06	1.12695	2	6.37065	0	1.164e-05	58.29	0.000527925	2	1814.96	1.55124	48.0978	0
	High	IGAEVYHNLk	4	1	1	P06733	K10(Lys8)	0	1.03299e+07	0.894771	2	6.56561	0	0.004027	58.11	0.000271038	2	1151.63	0.326773	25.6201	0
	High	YISPDQLADLYk	3	1	1	P06733	K12(Lys8)	0	1.62934e+07	1.08133	1		0	0.0006769	56.3	0.000656267	2	1433.74	1.20709	45.0603	0
	High	DATNVGDEGGFAPNILENKEGLELLK	5	1	1	P06733		0	2.54764e+06	1.11353	1		0	0.0001861	52.92	0.00350768	3	2743.38	1.58105	52.1879	1
	High	DATNVGDEGGFAPNILENk	8	1	1	P06733	K19(Lys8)	0	1.83119e+07	0.963173	2	7.09289	0	0.0002057	50.79	0.00423385	2	1968.95	3.92218	42.1505	0
	High	LAmQEFmILPVGAANFR	5	1	1	P06733	M3(Oxidation); M7(Oxidation)	0	8.19274e+06	1.00353	1		0	5.208e-05	46.76	0.0094941	2	1939.98	0.946435	50.4478	0
	High	IGAEVYHNLK	4	1	1	P06733		0	8.84296e+06	0.909801	3	0.510272	0	0.006763	46.53	0.00403753	2	1143.62	0.149548	25.4001	0
	High	DATNVGDEGGFAPNILENkEGLELLk	4	1	1	P06733	K19(Lys8); K26(Lys8)	0	2.79893e+06	0.960959	2	8.05516	0	0.02259	40.11	0.0600106	3	2759.41	2.00821	52.2076	1
	High	FTASAGIQVVGDDLTVTNPK	3	1	1	P06733		0	2.80025e+06	0.993642	1		0	0.0009858	30.48	0.38344	2	2033.06	0.980363	44.8124	0
	High	FTASAGIQVVGDDLTVTNPk	5	1	1	P06733	K20(Lys8)	0	2.46865e+06	1.03958	2	30.9697	0	0.0004855	27.15	0.759541	2	2041.07	2.51246	44.7768	0
	High	ScNcLLLk	1	1	1	P06733	C2(Carbamidomethyl); C4(Carbamidomethyl); K8(Lys8)	0	3.29974e+06	0.935106	1		0.009	0.1122	22.12	0.897934	2	1015.52	0.481996	29.6003	0
P14618	Pyruvate kinase PKM OS=Homo sapiens GN=PKM PE=1 SV=4 - [KPYM_HUMAN]	1394.77	42.56	1	17	17	101	7.63543e+06	1.0486	56	20.9298	531	57.9	7.84033
	A2	Sequence	# PSMs	# Proteins	# Protein Groups	Protein Group Accessions	Modifications	ΔCn	Area	Light/Heavy	Light/Heavy Count	Light/Heavy Variability [%]	q-Value	PEP	IonScore	Exp Value	Charge	MH+ [Da]	ΔM [ppm]	RT [min]	# Missed Cleavages
	High	LAPITSDPTEATAVGAVEASFK	6	1	1	P14618		0	4.35589e+06	1.23635	3	1.21562	0	1.4735e-08	102.25	2.81212e-08	2	2175.12	2.98283	50.5897	0
	High	IYVDDGLISLQVK	3	1	1	P14618		0	1.09194e+06	1.24342	1		0	0.000165	79.64	2.24727e-06	2	1462.82	0.752301	47.4451	0
	High	NTGIIcTIGPASR	4	1	1	P14618	C6(Carbamidomethyl)	0	6408121	0.891165	2	2.52868	0	0.0007345	74.22	1.03391e-05	2	1359.71	1.36751	33.8292	0
	High	LDIDSPPITAR	3	1	1	P14618		0	7.84734e+06	1.1438	1		0	0.0004031	70.11	2.08843e-05	2	1197.65	0.0561403	35.2888	0
	High	NTGIIcTIGPASr	3	1	1	P14618	C6(Carbamidomethyl); R13(Arg10)	0	7.3144e+06	0.854963	1		0	0.005962	65.25	7.88589e-05	2	1369.71	0.400387	33.8129	0
	High	LDIDSPPITAr	3	1	1	P14618	R11(Arg10)	0	6.93857e+06	1.16668	2	0.169024	0	0.0001973	61.16	0.00015599	2	1207.66	0.890634	35.1817	0
	High	LAPITSDPTEATAVGAVEASFk	9	1	1	P14618	K22(Lys8)	0	3.75428e+06	1.16265	3	4.5165	0	3.084e-05	58.51	0.000659618	2	2183.13	0.829313	50.5148	0
	High	GVNLPGAAVDLPAVSEk	3	1	1	P14618	K17(Lys8)	0	4.47353e+06	1.10878	2	4.87707	0	8.572e-05	56.41	0.000615283	2	1644.91	0.934581	43.3677	0
	High	GADFLVTEVENGGSLGSK	3	1	1	P14618		0	1.80115e+06	0.754208	2	0.928399	0	0.0001268	53.97	0.00165598	2	1779.88	1.91633	45.7775	0
	High	GADFLVTEVENGGSLGSk	2	1	1	P14618	K18(Lys8)	0	2.18358e+06	0.777658	1		0	0.0002576	53.51	0.00185036	2	1787.89	1.81773	45.6718	0
	High	AEGSDVANAVLDGADcImLSGETAk	7	1	1	P14618	C16(Carbamidomethyl); M18(Oxidation); K25(Lys8)	0	1.58126e+06	0.864767	3	12.649	0	1.641e-05	51.94	0.00463904	2	2518.16	1.94711	48.0613	0
	High	IYVDDGLISLQVk	3	1	1	P14618	K13(Lys8)	0	878176	0.997385	2	3.95857	0	0.0103	49.78	0.00197453	2	1470.83	2.54766	47.2947	0
	High	DPVQEAWAEDVDLR	2	1	1	P14618		0	1.1841e+06	1.02738	2	19.4372	0	0.001096	47.99	0.00584426	2	1642.77	1.46682	44.7416	0
	High	cDENILWLDYk	3	1	1	P14618	C1(Carbamidomethyl); K11(Lys8)	0	1.0693e+06	0.871131	3	4.28278	0	0.005153	46.98	0.00530383	2	1476.69	0.246525	47.2881	0
	High	GDYPLEAVR	3	1	1	P14618		0	3.9448e+06	1.05339	3	1.35279	0	0.01304	46.14	0.00355831	2	1019.52	0.290799	31.8429	0
	High	APIIAVTR	3	1	1	P14618		0	7.74456e+06	1.01668	3	3.50639	0	0.008024	44.34	0.00161425	2	840.53	-0.0872892	27.9752	0
	High	GVNLPGAAVDLPAVSEK	3	1	1	P14618		0	4.60046e+06	1.26848	1		0	9.385e-05	44.08	0.0111976	2	1636.89	1.41033	43.359	0
	High	AEGSDVANAVLDGADcImLSGETAK	7	1	1	P14618	C16(Carbamidomethyl); M18(Oxidation)	0	1.50106e+06	0.647403	3	41.803	0	8.925e-05	39.57	0.076866	2	2510.14	1.96881	48.0326	0
	High	APIIAVTr	2	1	1	P14618	R8(Arg10)	0	7.66703e+06				0	0.006505	39.38	0.00456191	2	850.538	-0.120657	27.9199	0
	High	TATESFASDPILYRPVAVALDTK	3	1	1	P14618		0	6.30931e+06	1.1874	3	0.835361	0	0.002926	36.9	0.0945631	3	2465.29	0.491186	50.9157	0
	High	GDLGIEIPAEk	3	1	1	P14618	K11(Lys8)	0	4.10538e+06	1.05595	1		0	0.0142	34.03	0.0719172	2	1149.63	1.26793	37.3208	0
	High	cDENILWLDYK	3	1	1	P14618	C1(Carbamidomethyl)	0	931500				0	0.001736	32.12	0.156663	2	1468.68	1.18859	47.1813	0
	High	VNFAMNVGK	1	1	1	P14618		0	862805	0.631772	1		0	0.003696	29.28	0.183186	2	979.503	-0.481122	32.1652	0
	High	KGVNLPGAAVDLPAVSEK	5	1	1	P14618		0	1.96232e+06	1.55758	5	25.3522	0	0.00067	27.49	0.354159	2	1764.99	2.20748	40.0812	1
	High	DPVQEAWAEDVDLr	3	1	1	P14618	R14(Arg10)	0	1.11884e+06	0.983638	1		0	0.01791	27.46	0.650411	2	1652.78	1.84646	44.8136	0
	High	ITLDNAYMEk	1	1	1	P14618	K10(Lys8)	0	1.20432e+06	0.491599	1		0	0.01169	21.09	1.64516	2	1205.6	-0.110622	33.6016	0
	High	GDLGIEIPAEK	3	1	1	P14618		0	4.54647e+06	1.08701	2	2.76144	0.001	0.04044	39.51	0.0223944	2	1141.61	-0.29306	37.0819	0
	High	ccSGAIIVLTk	2	1	1	P14618	C1(Carbamidomethyl); C2(Carbamidomethyl); K11(Lys8)	0	1.27691e+06	0.921253	1		0.002	0.05224	32.65	0.122612	2	1229.65	1.4029	34.6866	0
	High	VNFAmNVGK	2	1	1	P14618	M5(Oxidation)	0	2.09965e+06	0.748183	2	3.58522	0.002	0.05557	30.3	0.145074	2	995.498	-0.0863557	24.7953	0
	High	VNFAMNVGk	2	1	1	P14618	K9(Lys8)	0	1.36569e+06	0.799044	1		0.002	0.04956	26.77	0.354381	2	987.517	-0.0839049	32.1541	0
	High	ccSGAIIVLTK	1	1	1	P14618	C1(Carbamidomethyl); C2(Carbamidomethyl)	0	1.0518e+06				0.008	0.1061	11.63	13.2432	2	1221.63	-0.454648	34.6638	0
P07900	Heat shock protein HSP 90-alpha OS=Homo sapiens GN=HSP90AA1 PE=1 SV=5 - [HS90A_HUMAN]	1292.91	31.56	2	10	18	95	1.78117e+07	0.944943	55	12.9433	732	84.6067	5.021
	A2	Sequence	# PSMs	# Proteins	# Protein Groups	Protein Group Accessions	Modifications	ΔCn	Area	Light/Heavy	Light/Heavy Count	Light/Heavy Variability [%]	q-Value	PEP	IonScore	Exp Value	Charge	MH+ [Da]	ΔM [ppm]	RT [min]	# Missed Cleavages
	High	TLTIVDTGIGmTK	3	2	2	P07900;P08238	M11(Oxidation)	0	3.43486e+06	0.886437	2	15.4105	0	5.834e-06	80.07	2.41427e-06	2	1365.73	0.947617	36.7946	0
	High	TLTIVDTGIGmTk	3	2	2	P07900;P08238	M11(Oxidation); K13(Lys8)	0	3.9702e+06	0.899965	1		0	0.0001315	78.84	3.20338e-06	2	1373.74	0.469515	36.7647	0
	High	NPDDITNEEYGEFYk	3	2	1	P07900	K15(Lys8)	0	4.62289e+06	1.0565	2	10.4438	0	0.0005028	67.95	5.26586e-05	2	1841.8	2.16519	37.9958	0
	High	NPDDITNEEYGEFYK	3	2	1	P07900		0	4.43839e+06	0.917148	1		0	0.0005037	66.42	6.87181e-05	2	1833.79	1.99613	37.8633	0
	High	SLTNDWEDHLAVk	7	3	2	P07900;P08238	K13(Lys8)	0	4.70557e+06	0.943873	5	14.9236	0	0.0008521	63.3	0.00015599	2	1535.76	0.505523	38.5036	0
	High	ELISNSSDALDK	2	2	1	P07900		0	3.6907e+06	0.985019	1		0	0.009026	60.88	0.000196143	2	1291.64	0.0631843	28.8788	0
	High	ADLINNLGTIAk	3	3	2	P07900;P08238	K12(Lys8)	0	1.83007e+07	0.813478	1		0	0.001262	55.07	0.000469558	2	1250.72	0.422158	41.03	0
	High	SLTNDWEDHLAVK	7	3	2	P07900;P08238		0	4.20048e+06	0.849698	1		0	0.0005749	54.33	0.00113239	2	1527.75	1.33262	38.5098	0
	High	ADLINNLGTIAK	3	3	2	P07900;P08238		0	1.51568e+07	0.838662	2	1.86022	0	0.002912	53.03	0.000814796	2	1242.71	0.750826	40.9135	0
	High	ELISNSSDALDk	3	2	1	P07900	K12(Lys8)	0	3.98977e+06	1.04777	2	5.68898	0	0.003251	51.13	0.00180854	2	1299.65	0.784309	28.7729	0
	High	EDQTEYLEEr	2	3	2	P07900;P08238	R10(Arg10)	0	7.19765e+06	0.922853	2	2.53878	0	0.00415	49.4	0.00198114	2	1321.58	0.787642	26.1036	0
	High	YESLTDPSKLDSGK	3	3	2	P07900;P08238		0	2.41254e+06	1.01862	2	3.29691	0	0.007331	47.85	0.00514981	2	1539.76	1.87568	28.6057	1
	High	TLTIVDTGIGMTK	2	2	2	P07900;P08238		0	467345	0.334172	1		0	0.001975	47.6	0.00355033	2	1349.74	0.809049	42.0595	0
	High	DQVANSAFVER	3	2	1	P07900		0	5.34143e+06	0.916879	2	3.0379	0	0.002905	47.47	0.00365552	2	1235.6	0.442764	26.6905	0
	High	EGLELPEDEEEk	2	3	2	P07900;P08238	K12(Lys8)	0	3.53851e+06	1.06078	2	3.7116	0	0.006876	46.04	0.00599441	2	1424.65	0.316603	32.5343	0
	High	DQVANSAFVEr	4	2	1	P07900	R11(Arg10)	0	5.70753e+06	0.879948	1		0	0.01453	38.58	0.0288584	2	1245.61	0.660722	26.9012	0
	High	HLEINPDHSIIETLr	2	2	1	P07900	R15(Arg10)	0	1.47789e+06	0.925096	2	3.29854	0	0.005271	36.13	0.0844945	3	1796.95	0.178593	40.407	0
	High	ESEDKPEIEDVGsDEEEEK	3	2	1	P07900	S13(Phospho)	0	8.59723e+06				0	0.002008	36.02	0.0601708	2	2272.89	0.953489	27.9128	0
	High	EDQTEYLEER	2	3	2	P07900;P08238		0	6.75707e+06	0.939749	1		0	0.01095	35.17	0.0499009	2	1311.57	0.397134	26.3141	0
	High	YESLTDPSK	2	3	2	P07900;P08238		0	5.16805e+06	1.02151	2	1.80932	0	0.01377	34.93	0.0430631	2	1039.49	-0.187732	22.2181	0
	High	ESEDkPEIEDVGsDEEEEkk	2	2	1	P07900	K5(Lys8); S13(Phospho); K19(Lys8); K20(Lys8)	0	2.1047e+07	0.968458	1		0	0.01886	34.55	0.184881	3	2425.03	1.64576	25.2249	1
	High	ESEDkPEIEDVGsDEEEEk	3	2	1	P07900	K5(Lys8); S13(Phospho); K19(Lys8)	0	8.2415e+06	1.03032	3	7.50486	0	0.0003066	34.52	0.103235	2	2288.92	1.6595	27.5537	0
	High	LVTSPccIVTSTYGWTANmEr	5	2	1	P07900	C6(Carbamidomethyl); C7(Carbamidomethyl); M19(Oxidation); R21(Arg10)	0	1.59289e+06	1.01953	4	7.81647	0	0.002777	33.25	0.334849	2	2472.13	3.3963	47.2079	0
	High	YIDQEELNK	2	3	2	P07900;P08238		0	10984291	0.904037	2	1.92538	0	0.01555	32.81	0.093515	2	1151.56	-0.125433	23.7783	0
	High	TLTIVDTGIGMTk	3	2	2	P07900;P08238	K13(Lys8)	0	1.63182e+06	0.285458	2	9.36275	0	0.01393	30.18	0.199315	2	1357.75	0.955477	41.8539	0
	High	ESEDKPEIEDVGsDEEEEKK	5	2	1	P07900	S13(Phospho)	0	2.41502e+07	1.04019	4	1.85873	0	0.005892	29.53	0.427388	3	2400.98	0.795628	25.4176	1
	High	EGLELPEDEEEK	1	3	2	P07900;P08238		0	3.69364e+06				0	0.009872	26.06	0.517038	2	1416.64	0.0873064	32.5576	0
	High	YESLTDPSkLDSGk	3	3	2	P07900;P08238	K9(Lys8); K14(Lys8)	0	2.42169e+06	0.944943	1		0	0.02116	25.28	0.961495	2	1555.78	0.237181	28.5705	1
	High	HLEINPDHSIIETLR	3	2	1	P07900		0	1.74355e+06	0.748021	1		0	0.001825	22.04	2.20936	3	1786.94	0.0251831	40.2576	0
	High	LVTSPccIVTSTYGWTANmER	2	2	1	P07900	C6(Carbamidomethyl); C7(Carbamidomethyl); M19(Oxidation)	0	1.28652e+06	0.893976	1		0	0.004647	20.14	6.68354	2	2462.12	0.224122	47.1418	0
	High	LGLGIDEDDPTADDTSAAVTEEmPPLEGDDDTSR	1	2	1	P07900	M23(Oxidation)	0	1.54611e+06	1.32453	1		0	0.01411	14.54	40.0761	3	3563.55	3.55479	44.3487	0
	High	HIYYITGETk	1	2	1	P07900	K10(Lys8)	0	4.22517e+06	0.790089	1		0.001	0.02627	25.48	0.689869	2	1232.64	0.638012	26.3515	0
	High	LGIHEDSQNr	1	2	1	P07900	R10(Arg10)	0	1.48789e+06	0.606394	1		0.004	0.07068	12.63	10.3667	2	1178.58	0.572785	17.0831	0
	High	YESLTDPSk	1	3	2	P07900;P08238	K9(Lys8)	0	4.4339e+06				0.005	0.07647	14.54	4.93591	2	1047.51	-0.456446	21.413	0
P60709	Actin, cytoplasmic 1 OS=Homo sapiens GN=ACTB PE=1 SV=1 - [ACTB_HUMAN]	1000.35	37.6	2	12	12	78	3.45852e+07	1.11335	45	10.7025	375	41.7097	5.47803
	A2	Sequence	# PSMs	# Proteins	# Protein Groups	Protein Group Accessions	Modifications	ΔCn	Area	Light/Heavy	Light/Heavy Count	Light/Heavy Variability [%]	q-Value	PEP	IonScore	Exp Value	Charge	MH+ [Da]	ΔM [ppm]	RT [min]	# Missed Cleavages
	High	DLYANTVLSGGTTmYPGIADr	7	2	1	P60709	M14(Oxidation); R21(Arg10)	0	7.02658e+06	1.0739	3	4.20071	0	4.373e-07	71.26	4.71683e-05	2	2241.07	0.569008	44.4969	0
	High	DLYANTVLSGGTTmYPGIADR	5	2	1	P60709	M14(Oxidation)	0	7.27969e+06	1.04417	3	1.16148	0	3.895e-06	68.52	8.55721e-05	2	2231.07	1.54216	44.6768	0
	High	VAPEEHPVLLTEAPLNPk	4	2	1	P60709	K18(Lys8)	0	2.9116e+07	1.63103	3	0.522507	0	3.697e-05	67.28	4.71318e-05	2	1962.08	1.41085	38.4218	0
	High	SYELPDGQVITIGNEr	6	2	1	P60709	R16(Arg10)	0	2.33216e+07	1.10592	3	1.16161	0	2.939e-06	63.78	0.000183159	2	1800.9	2.20006	44.7854	0
	High	QEYDESGPSIVHr	6	2	1	P60709	R13(Arg10)	0	7.22816e+06	1.13393	4	3.41105	0	0.0004412	57.48	0.000504147	2	1526.71	1.20249	25.3841	0
	High	VAPEEHPVLLTEAPLNPK	6	2	1	P60709		0	4.85735e+07	1.61364	3	1.79816	0	0.0001338	55.31	0.000840043	2	1954.07	0.811814	38.3858	0
	High	GYSFTTTAEr	3	2	1	P60709	R10(Arg10)	0	2.96545e+07	0.947469	3	1.63233	0	0.003102	54.71	0.000539721	2	1142.54	0.297373	27.155	0
	High	GYSFTTTAER	3	2	1	P60709		0	2.76566e+07				0	0.001722	51.36	0.00111352	2	1132.53	0.271939	27.1605	0
	High	SYELPDGQVITIGNER	6	2	1	P60709		0	2.55276e+07	1.23605	3	5.36966	0	0.0004541	44.24	0.0162171	2	1790.9	1.71748	44.6425	0
	High	QEYDESGPSIVHR	6	2	1	P60709		0	8.22269e+06	1.11065	2	1.70567	0	0.02327	39.29	0.0324607	2	1516.7	1.0285	25.147	0
	High	EITALAPSTMK	1	2	1	P60709		0	3.4679e+06	1.10356	1		0	0.01465	35.5	0.0609334	2	1161.62	0.319135	32.1487	0
	High	KDLYANTVLSGGTTmYPGIADR	2	2	1	P60709	M15(Oxidation)	0	1.7041e+06	1.2635	2	4.01869	0	0.002656	32.39	0.394133	3	2359.16	-0.539081	39.8468	1
	High	kDLYANTVLSGGTTmYPGIADr	2	2	1	P60709	K1(Lys8); M15(Oxidation); R22(Arg10)	0	1.26558e+06	1.11335	1		0	0.00344	17.08	12.1967	3	2377.19	2.1066	39.9615	1
	High	IWHHTFYNELR	2	2	1	P60709		0	1.93973e+06	0.898763	1		0	0.01684	14.44	10.9724	3	1515.75	0.15339	33.3045	0
	High	AVFPSIVGRPR	2	2	1	P60709		0	1.21213e+07	1.33898	2	0.309742	0.001	0.04161	42.48	0.00728769	2	1198.71	1.35948	34.8101	0
	High	EITALAPSTMk	1	2	1	P60709	K11(Lys8)	0	3.39746e+06				0.001	0.02857	31.63	0.140815	2	1169.63	0.283738	32.1434	0
	High	EITALAPSTmK	2	2	1	P60709	M10(Oxidation)	0	1.22114e+07	1.10086	2	4.1546	0.001	0.03885	23.71	0.759268	2	1177.61	0.0718564	26.5763	0
	High	DSYVGDEAQSk	3	2	1	P60709	K11(Lys8)	0	1.29936e+07	1.07252	3	0.870975	0.001	0.03299	19.25	1.89685	2	1206.54	0.257317	18.3763	0
	High	AGFAGDDAPR	1	2	1	P60709		0	1.7575e+07				0.001	0.03466	15.66	2.96907	2	976.448	-0.000490137	19.8867	0
	High	DLTDYLmK	1	2	1	P60709	M7(Oxidation)	0	6.32054e+06	1.10315	1		0.002	0.05158	32.76	0.0659696	2	1014.48	-0.0172792	37.2966	0
	High	EITALAPSTmk	2	2	1	P60709	M10(Oxidation); K11(Lys8)	0	1.13453e+07				0.002	0.0614	18.82	2.4794	2	1185.63	-0.167308	26.5652	0
	High	DLTDYLmk	3	2	1	P60709	M7(Oxidation); K8(Lys8)	0	5.72953e+06	0.977023	2	5.7915	0.004	0.07366	26.26	0.330046	2	1022.5	0.303021	37.2403	0
	High	AVFPSIVGrPr	1	2	1	P60709	R9(Arg10); R11(Arg10)	0	8.8713e+06				0.005	0.0793	29.01	0.139922	2	1218.72	0.788333	34.9478	0
	High	IWHHTFYNELr	2	2	1	P60709	R11(Arg10)	0	2.62338e+06	0.83911	2	23.449	0.005	0.07896	23.84	1.3042	3	1525.76	-0.0268023	33.5302	0
	High	AGFAGDDAPr	1	2	1	P60709	R10(Arg10)	0	1.45903e+07	1.13308	1		0.005	0.07578	17.85	1.67094	2	986.457	0.0317324	19.9228	0
P68371	Tubulin beta-4B chain OS=Homo sapiens GN=TUBB4B PE=1 SV=1 - [TBB4B_HUMAN]	942.56	35.73	1	4	13	74	1.21347e+07	1.23106	41	19.6748	445	49.799	4.89404
	A2	Sequence	# PSMs	# Proteins	# Protein Groups	Protein Group Accessions	Modifications	ΔCn	Area	Light/Heavy	Light/Heavy Count	Light/Heavy Variability [%]	q-Value	PEP	IonScore	Exp Value	Charge	MH+ [Da]	ΔM [ppm]	RT [min]	# Missed Cleavages
	High	ImNTFSVVPSPk	3	2	2	P68371;P07437	M2(Oxidation); K12(Lys8)	0	8.72958e+06	1.4276	1		0	1.896e-05	76.79	5.00702e-06	2	1343.71	0.724056	35.4172	0
	High	LAVNmVPFPR	3	2	2	P68371;P07437	M5(Oxidation)	0	1.29922e+07	1.40029	1		0	0.0006003	73.04	9.75556e-06	2	1159.63	-0.0847776	38.4741	0
	High	ImNTFSVVPSPK	4	2	2	P68371;P07437	M2(Oxidation)	0	1.24624e+07	1.43539	2	3.27904	0	0.002541	72.49	1.3051e-05	2	1335.7	0.48331	35.4696	0
	High	LAVNmVPFPr	3	2	2	P68371;P07437	M5(Oxidation); R10(Arg10)	0	9.34549e+06	1.37998	1		0	0.0002776	60.25	0.000170922	2	1169.64	0.464949	38.4024	0
	High	LAVNMVPFPr	3	2	2	P68371;P07437	R10(Arg10)	0	1.00227e+06	1.15434	3	6.00297	0	0.002263	53.48	0.000729436	2	1153.64	0.507761	43.9252	0
	High	mSATFIGNSTAIQELFK	1	1	1	P68371	M1(Oxidation)	0	992066	1.23106	1		0	4.669e-05	53.31	0.0021296	2	1873.94	1.59259	54.0429	0
	High	YLTVAAVFr	3	2	2	P68371;P07437	R9(Arg10)	0	2.9459e+06	0.934605	1		0	0.007082	50.65	0.00117999	2	1049.6	-0.297514	44.5622	0
	High	INVYYNEATGGk	4	1	1	P68371	K12(Lys8)	0	2.00002e+06	1.11361	3	6.07366	0	0.00185	46.12	0.00632482	2	1336.66	1.23272	29.3561	0
	High	FPGQLNADLr	3	2	2	P68371;P07437	R10(Arg10)	0	9.0933e+06	2.06922	2	97.3864	0	0.005804	42.27	0.0109395	2	1140.6	0.493839	35.1148	0
	High	EVDEQMLNVQNK	3	2	2	P68371;P07437		0	3.47806e+06	1.16395	2	3.32719	0	0.01766	42.21	0.0174911	2	1446.69	0.497532	30.5026	0
	High	IMNTFSVVPSPK	3	2	2	P68371;P07437		0	1.84734e+06	1.64615	2	2.27907	0	0.01057	41.65	0.0164891	2	1319.7	1.35344	39.3674	0
	High	NSSYFVEWIPNNVk	3	2	2	P68371;P07437	K14(Lys8)	0	5.09303e+06	1.23182	2	6.16855	0	0.001925	40.57	0.0355975	2	1704.85	1.36939	49.1743	0
	High	YLTVAAVFR	3	2	2	P68371;P07437		0	2.80505e+06	0.935314	2	9.96327	0	0.001368	40.46	0.0151295	2	1039.59	0.843262	44.3985	0
	High	ISEQFTAmFr	2	2	2	P68371;P07437	M8(Oxidation); R10(Arg10)	0	1.24034e+06	1.06577	2	0.623596	0	0.007749	39.82	0.0224515	2	1255.6	0.619002	36.0945	0
	High	FPGQLNADLR	2	2	2	P68371;P07437		0	10949611	1.58225	1		0	0.008245	39.12	0.024278	2	1130.6	0.470101	34.85	0
	High	AVLVDLEPGTmDSVr	3	1	1	P68371	M11(Oxidation); R15(Arg10)	0	1.51682e+06	1.82897	1		0	0.001188	34.7	0.119748	2	1627.83	1.82475	38.8432	0
	High	AVLVDLEPGTmDSVR	3	1	1	P68371	M11(Oxidation)	0	2.39439e+06	1.41744	2	4.0554	0	0.0007189	33.83	0.141402	2	1617.82	1.43913	38.8312	0
	High	EVDEQMLNVQNk	3	2	2	P68371;P07437	K12(Lys8)	0	3.05594e+06	1.1049	1		0	0.01189	33	0.154666	2	1454.7	0.719832	30.3671	0
	High	NSSYFVEWIPNNVK	4	2	2	P68371;P07437		0	6.58532e+06	1.20297	1		0	0.006951	32.52	0.216822	2	1696.83	0.82323	49.2326	0
	High	EVDEQmLNVQNk	3	2	2	P68371;P07437	M6(Oxidation); K12(Lys8)	0	6.67229e+06	1.10664	3	0.517195	0	0.02296	29.18	0.353588	2	1470.7	0.434473	23.7617	0
	High	TAVcDIPPR	4	2	2	P68371;P07437	C4(Carbamidomethyl)	0	1.89068e+06	1.62963	1		0	0.01324	28.68	0.257825	2	1028.52	0.178459	26.1491	0
	High	INVYYNEATGGK	2	1	1	P68371		0	2.17611e+06				0	0.01499	26.3	0.57879	2	1328.65	0.901887	29.3504	0
	High	ALTVPELTQQmFDAk	2	1	1	P68371	M11(Oxidation); K15(Lys8)	0	1.37375e+06	1.47212	1		0	0.01273	23.58	1.63353	2	1715.88	2.93262	42.4408	0
	High	EVDEQmLNVQNK	1	2	2	P68371;P07437	M6(Oxidation)	0	6.59323e+06				0	0.02302	23.04	1.33633	2	1462.69	0.546866	23.7006	0
	High	ALTVPELTQQmFDAK	3	1	1	P68371	M11(Oxidation)	0	2.30433e+06	1.6962	2	33.1177	0	0.01438	15.54	10.6424	2	1707.87	3.11207	42.4836	0
	High	LHFFmPGFAPLTSr	2	2	2	P68371;P07437	M5(Oxidation); R14(Arg10)	0	897038	1.32788	2	32.6064	0	0.008089	15.09	11.4666	2	1646.84	1.40679	47.9272	0
	High	IMNTFSVVPSPk	1	2	2	P68371;P07437	K12(Lys8)	0	856578	1.5135	1		0.001	0.04608	39.08	0.0283835	2	1327.72	2.51123	39.1027	0
P13796	Plastin-2 OS=Homo sapiens GN=LCP1 PE=1 SV=6 - [PLSL_HUMAN]	940.888	33.01	1	17	17	76	7.32029e+06	1.0203	44	16.5194	627	70.2439	5.42725
	A2	Sequence	# PSMs	# Proteins	# Protein Groups	Protein Group Accessions	Modifications	ΔCn	Area	Light/Heavy	Light/Heavy Count	Light/Heavy Variability [%]	q-Value	PEP	IonScore	Exp Value	Charge	MH+ [Da]	ΔM [ppm]	RT [min]	# Missed Cleavages
	High	FSLVGIGGQDLNEGNR	5	1	1	P13796		0	1.13445e+07	0.994528	2	0.994981	0	2.113e-05	69.91	3.81525e-05	2	1675.84	0.570825	43.3765	0
	High	QFVTATDVVR	3	1	1	P13796		0	4.62259e+06	0.996013	2	2.45888	0	0.003775	69.29	2.04374e-05	2	1135.61	0.315436	32.5998	0
	High	FSLVGIGGQDLNEGNr	4	1	1	P13796	R16(Arg10)	0	1.08714e+07	1.04351	1		0	1.636e-05	66.93	7.79847e-05	2	1685.85	1.31037	43.266	0
	High	QFVTATDVVr	3	1	1	P13796	R10(Arg10)	0	4.13617e+06	1.09482	1		0	0.002178	62.87	9.59502e-05	2	1145.62	0.0207601	32.6203	0
	High	NEALIALLR	3	1	1	P13796		0	1.95183e+06	1.1397	2	0.388542	0	0.001071	54.93	0.000270108	2	1012.62	0.267302	46.5583	0
	High	NEALIALLr	1	1	1	P13796	R9(Arg10)	0	1.64312e+06	1.12561	1		0	0.00329	52.09	0.000577845	2	1022.62	0.236079	46.6291	0
	High	LSPEELLLr	1	1	1	P13796	R9(Arg10)	0	2.89718e+06	1.17524	1		0	0.004208	48.46	0.00186469	2	1079.63	0.754554	45.8838	0
	High	LSPEELLLR	3	1	1	P13796		0	3.83613e+06	1.18418	2	30.99	0	0.004034	46.36	0.00277332	2	1069.63	0.389529	45.6541	0
	High	AYYHLLEQVAPk	3	1	1	P13796	K12(Lys8)	0	1.84488e+06	0.966707	2	6.5371	0	0.003532	44.51	0.00830832	2	1439.78	0.225861	37.8725	0
	High	GDEEGVPAVVIDmSGLR	4	1	1	P13796	M13(Oxidation)	0	1.80235e+06	0.909467	3	8.23502	0	0.0001712	44.44	0.0152606	2	1759.85	0.827089	41.9734	0
	High	mINLSVPDTIDEr	3	1	1	P13796	M1(Oxidation); R13(Arg10)	0	2.03973e+06	1.34491	3	2.13539	0	0.008844	44.33	0.0120471	2	1528.76	2.38845	40.1486	0
	High	VYALPEDLVEVNPk	3	1	1	P13796	K14(Lys8)	0	4.2101e+06	1.28996	3	5.11435	0	0.0007015	40.22	0.0258755	2	1593.86	0.706539	45.1432	0
	High	AYYHLLEQVAPK	6	1	1	P13796		0	1.70661e+06	0.932854	4	9.89615	0	0.0009485	38.77	0.0328796	2	1431.77	1.36262	37.7383	0
	High	EGIcAIGGTSEQSSVGTQHSYSEEEK	3	1	1	P13796	C4(Carbamidomethyl)	0	4.69496e+06	0.88698	1		0	5.411e-05	37.96	0.116224	3	2770.21	0.104863	30.3851	0
	High	VYALPEDLVEVNPK	3	1	1	P13796		0	5.32317e+06				0	0.001806	35.41	0.0783659	2	1585.85	1.27343	45.1492	0
	High	mINLSVPDTIDER	3	1	1	P13796	M1(Oxidation)	0	2.85722e+06				0	0.01637	33.8	0.134357	2	1518.75	1.17763	39.9918	0
	High	YAFVNWINk	2	1	1	P13796	K9(Lys8)	0	785970	0.849619	2	17.3105	0	0.02269	32.63	0.106259	2	1162.61	0.343106	44.8893	0
	High	GDEEGVPAVVIDmSGLr	4	1	1	P13796	M13(Oxidation); R17(Arg10)	0	1.58761e+06	1.27462	1		0	7.462e-05	31.73	0.274379	2	1769.87	2.15083	42.0097	0
	High	EGIcAIGGTSEQSSVGTQHSYSEEEk	3	1	1	P13796	C4(Carbamidomethyl); K26(Lys8)	0	5.2932e+06	0.993924	2	11.7632	0	5.865e-05	29.3	0.88317	3	2778.22	-1.22757	30.3169	0
	High	AAcLPLPGYR	1	1	1	P13796	C3(Carbamidomethyl)	0	2.19787e+06	1.82104	1		0	0.01664	26.2	0.465134	2	1117.58	-0.220522	36.6848	0
	High	NWmNSLGVNPr	1	1	1	P13796	M3(Oxidation); R11(Arg10)	0	1.4124e+06	1.10264	1		0	0.01938	25.91	0.576368	2	1313.63	1.24526	34.751	0
	High	EITENLmATGDLDQDGR	1	1	1	P13796	M7(Oxidation)	0	729631	1.48944	1		0	0.002874	19.88	4.28426	2	1893.85	1.9171	34.2445	0
	High	NWmNSLGVNPR	2	1	1	P13796	M3(Oxidation)	0	1.34226e+06	1.25023	1		0	0.01265	16.71	4.60524	2	1303.62	0.855886	34.2274	0
	High	IGNFSTDIKDSK	1	1	1	P13796		0	1.32048e+06	1.02029	1		0	0.003221	16.29	7.11351	2	1324.68	0.539851	27.5461	1
	High	TENLNDDEKLNNAK	1	1	1	P13796		0	3.72178e+06	0.935792	1		0	0.01487	11.43	25.9325	2	1617.77	0.97516	20.1795	1
	High	TENLNDDEkLNNAk	1	1	1	P13796	K9(Lys8); K14(Lys8)	0	4.2342e+06	1.02369	1		0.001	0.02406	18.29	5.3808	2	1633.8	0.992759	20.0891	1
	High	ISFDEFIk	1	1	1	P13796	K8(Lys8)	0	1.7314e+06	0.728972	1		0.002	0.05366	21.97	1.00255	2	1006.53	-0.256863	46.0416	0
	High	YAFVNWINK	1	1	1	P13796		0	1.08943e+06				0.002	0.05229	18.77	2.49882	2	1154.6	-0.466672	44.7477	0
	High	IGNFSTDIk	3	1	1	P13796	K9(Lys8)	0	1.21158e+06	0.895418	3	1.01542	0.003	0.06378	36.49	0.0337929	2	1002.53	-0.523757	30.7697	0
	High	IGNFSTDIK	3	1	1	P13796		0	1.27718e+06				0.005	0.08284	24.79	0.503318	2	994.52	-0.795777	30.8538	0
P04406-2	Isoform 2 of Glyceraldehyde-3-phosphate dehydrogenase OS=Homo sapiens GN=GAPDH - [G3P_HUMAN]	799.169	39.59	2	7	7	36	1.01822e+07	1.01423	20	11.4717	293	31.528	7.60596
	A2	Sequence	# PSMs	# Proteins	# Protein Groups	Protein Group Accessions	Modifications	ΔCn	Area	Light/Heavy	Light/Heavy Count	Light/Heavy Variability [%]	q-Value	PEP	IonScore	Exp Value	Charge	MH+ [Da]	ΔM [ppm]	RT [min]	# Missed Cleavages
	High	VPTANVSVVDLTcR	6	2	1	P04406-2	C13(Carbamidomethyl)	0	8.55743e+06	0.980123	5	1.73806	0	0.0001147	104.34	1.20783e-08	2	1530.8	1.24707	38.7445	0
	High	IISNAScTTNcLAPLAK	3	2	1	P04406-2	C7(Carbamidomethyl); C11(Carbamidomethyl)	0	4.61569e+06	0.994955	2	5.23363	0	2.837e-06	82.37	2.54311e-06	2	1833.92	1.68484	35.2313	0
	High	IISNAScTTNcLAPLAk	3	2	1	P04406-2	C7(Carbamidomethyl); C11(Carbamidomethyl); K17(Lys8)	0	4.52519e+06	1.09998	1		0	0.0001022	71.11	3.30889e-05	2	1841.94	0.794872	35.142	0
	High	LISWYDNEFGYSNR	4	2	1	P04406-2		0	3.4734e+06	0.972703	3	4.63949	0	0.0003344	61.89	0.000228862	2	1763.81	1.58866	46.3043	0
	High	LISWYDNEFGYSNr	3	2	1	P04406-2	R14(Arg10)	0	3.38977e+06				0	0.0007575	54.59	0.00128797	2	1773.81	-0.811023	46.2689	0
	High	LVINGNPITIFQEr	1	2	1	P04406-2	R14(Arg10)	0	1.52298e+06	1.02297	1		0	0.0009309	51.73	0.00126732	2	1623.91	2.57985	51.0175	0
	High	VPTANVSVVDLTcr	3	2	1	P04406-2	C13(Carbamidomethyl); R14(Arg10)	0	8.78825e+06				0	0.0002082	51.15	0.00241335	2	1540.8	1.10115	38.5739	0
	High	LVINGNPITIFQER	5	2	1	P04406-2		0	1.63262e+06	1.15313	2	27.5611	0	0.0005651	44.04	0.00814357	2	1613.9	0.533965	50.9843	0
	High	WGDAGAEYVVESTGVFTTmEk	1	2	1	P04406-2	M19(Oxidation); K21(Lys8)	0	220010	0.656343	1		0	0.001346	33.84	0.241881	2	2301.04	-1.7187	49.36	0
	High	VIISAPSADAPmFVmGVNHEK	2	2	1	P04406-2	M12(Oxidation); M15(Oxidation)	0	8.39042e+06	1.29372	2	1.14797	0	0.01873	26.38	1.39341	3	2245.1	1.16722	39.0391	0
	High	GALQNIIPASTGAAk	2	2	1	P04406-2	K15(Lys8)	0	1.10565e+07	1.21732	1		0	0.00996	25.71	0.46725	2	1419.81	1.36346	37.2603	0
	High	GALQNIIPASTGAAK	2	2	1	P04406-2		0	1.33679e+07	1.20014	1		0	0.00747	17.89	3.28198	2	1411.79	0.620534	37.0112	0
	High	VIISAPSADAPmFVmGVNHEk	1	2	1	P04406-2	M12(Oxidation); M15(Oxidation); K21(Lys8)	0	5.84473e+06	1.4091	1		0	0.009163	15.26	18.3596	3	2253.12	0.983293	38.8779	0
B7Z7A9	Phosphoglycerate kinase OS=Homo sapiens GN=PGK1 PE=1 SV=1 - [B7Z7A9_HUMAN]	714.218	43.44	2	11	11	60	4.73071e+06	1.02715	29	27.6369	389	41.4024	7.32764
	A2	Sequence	# PSMs	# Proteins	# Protein Groups	Protein Group Accessions	Modifications	ΔCn	Area	Light/Heavy	Light/Heavy Count	Light/Heavy Variability [%]	q-Value	PEP	IonScore	Exp Value	Charge	MH+ [Da]	ΔM [ppm]	RT [min]	# Missed Cleavages
	High	AcANPAAGSVILLENLR	4	2	1	B7Z7A9	C2(Carbamidomethyl)	0	2.37274e+06	1.29718	1		0	2.514e-06	61.94	0.000220517	2	1768.94	1.94482	50.94	0
	High	AcANPAAGSVILLENLr	5	2	1	B7Z7A9	C2(Carbamidomethyl); R17(Arg10)	0	2.00445e+06	1.31433	2	1.18339	0	5.766e-06	59.58	0.000371494	2	1778.95	0.853833	50.934	0
	High	GcITIIGGGDTATccAk	3	2	1	B7Z7A9	C2(Carbamidomethyl); C14(Carbamidomethyl); C15(Carbamidomethyl); K17(Lys8)	0	2.92102e+06	1.00184	3	1.66756	0	1.386e-05	58.87	0.0004461	2	1762.81	2.16077	32.8999	0
	High	VLPGVDALSNI	3	2	1	B7Z7A9		0	7.14132e+06				0	0.001978	57.12	0.000304428	2	1097.62	0.559244	50.3839	0
	High	LGDVYVNDAFGTAHR	5	2	1	B7Z7A9		0	3.51791e+06	1.01403	1		0	0.001486	55.27	0.00104172	3	1634.79	0.409552	36.5812	0
	High	LGDVYVNDAFGTAHr	5	2	1	B7Z7A9	R15(Arg10)	0	3.84443e+06	1.04343	3	3.81596	0	0.0004439	52.68	0.00195006	3	1644.8	0.240842	36.5684	0
	High	VLNNmEIGTSLFDEEGAK	3	2	1	B7Z7A9	M5(Oxidation)	0	3.20638e+06	0.967754	2	6.551	0	0.003702	47.47	0.00879277	2	1982.94	1.42263	42.4118	0
	High	VLNNmEIGTSLFDEEGAk	3	2	1	B7Z7A9	M5(Oxidation); K18(Lys8)	0	3.17016e+06	0.964453	1		0	0.0004657	46.95	0.00999293	2	1990.95	0.232455	42.1835	0
	High	YSLEPVAVELK	3	2	1	B7Z7A9		0	1.84001e+06	0.855389	3	1.47304	0	0.002169	40.26	0.0161722	2	1247.69	2.09363	41.6876	0
	High	YSLEPVAVELk	3	2	1	B7Z7A9	K11(Lys8)	0	1.95976e+06				0	0.01445	28.64	0.243045	2	1255.7	1.17442	41.7694	0
	High	GcITIIGGGDTATccAK	3	2	1	B7Z7A9	C2(Carbamidomethyl); C14(Carbamidomethyl); C15(Carbamidomethyl)	0	2.64364e+06				0	0.003629	28.5	0.45971	2	1754.79	2.54059	33.0291	0
	High	ITLPVDFVTADKFDENAK	4	2	1	B7Z7A9		0	1.91804e+06	1.24121	3	7.56311	0	0.01754	22.4	2.56991	2	2023.05	3.69377	49.1354	1
	High	ITLPVDFVTADkFDENAk	5	2	1	B7Z7A9	K12(Lys8); K18(Lys8)	0	1.6076e+06	1.14502	2	16.2102	0	0.0117	21.27	3.17353	3	2039.07	-0.480752	49.1965	1
	High	AHSSmVGVNLPQK	4	2	1	B7Z7A9	M5(Oxidation)	0	1.76618e+06	1.26575	3	2.24395	0	0.01543	11.63	18.2382	2	1383.71	0.549087	23.9169	0
	High	TGQATVASGIPAGWmGLDcGPESSkk	2	2	1	B7Z7A9	M15(Oxidation); C19(Carbamidomethyl); K25(Lys8); K26(Lys8)	0	1.47411e+06	0.996385	2	7.6312	0.001	0.03614	22.53	4.322	3	2637.27	1.8893	39.728	1
	High	AHSSmVGVNLPQk	1	2	1	B7Z7A9	M5(Oxidation); K13(Lys8)	0	1.46045e+06				0.001	0.03219	16.68	5.88076	2	1391.72	0.78115	24.0243	0
	High	VNEmIIGGGmAFTFLk	1	2	1	B7Z7A9	M4(Oxidation); M10(Oxidation); K16(Lys8)	0	621472	0.600618	1		0.001	0.02574	11.35	30.0421	2	1767.89	1.59487	49.3671	0
	High	YAEAVTR	1	2	1	B7Z7A9		0	574621				0.002	0.05658	13.68	3.64481	2	809.416	0.813943	17.3413	0
	High	YAEAVTr	2	2	1	B7Z7A9	R7(Arg10)	0	795666	0.907961	2	55.2031	0.005	0.08803	13.01	5.24036	2	819.423	-0.20001	17.24	0
P68104	Elongation factor 1-alpha 1 OS=Homo sapiens GN=EEF1A1 PE=1 SV=1 - [EF1A1_HUMAN]	665.749	22.73	2	7	7	34	1.00141e+07	0.99541	20	12.0561	462	50.1091	9.01221
	A2	Sequence	# PSMs	# Proteins	# Protein Groups	Protein Group Accessions	Modifications	ΔCn	Area	Light/Heavy	Light/Heavy Count	Light/Heavy Variability [%]	q-Value	PEP	IonScore	Exp Value	Charge	MH+ [Da]	ΔM [ppm]	RT [min]	# Missed Cleavages
	High	IGGIGTVPVGr	3	2	1	P68104	R11(Arg10)	0	1.26934e+07	1.01094	3	2.7543	0	1.723e-05	100.64	8.50897e-09	2	1035.62	0.154152	31.7369	0
	High	IGGIGTVPVGR	3	2	1	P68104		0	1.22489e+07				0	0.0005934	85.14	3.31151e-07	2	1025.61	0.124668	31.7423	0
	High	YYVTIIDAPGHR	6	2	1	P68104		0	2.85596e+06	0.918621	3	18.7468	0	0.0003583	61.18	0.000215478	2	1404.73	0.373995	35.6651	0
	High	EHALLAYTLGVk	2	2	1	P68104	K12(Lys8)	0	1.51307e+06	0.835761	2	6.98721	0	0.01367	55.41	0.000476353	2	1322.76	0.219855	39.4502	0
	High	YYVTIIDAPGHr	6	2	1	P68104	R12(Arg10)	0	3.15959e+06	1.05702	3	20.1671	0	0.00121	52.86	0.00141358	2	1414.74	0.480099	35.6528	0
	High	LPLQDVYK	2	2	1	P68104		0	1.04238e+07	0.975814	2	3.22621	0	0.01636	31.26	0.102611	2	975.551	-0.166523	33.6472	0
	High	EHALLAYTLGVK	2	2	1	P68104		0	1.20642e+06				0	0.02006	25.27	0.569371	2	1314.74	1.36491	39.3126	0
	High	VETGVLkPGmVVTFAPVNVTTEVk	4	2	1	P68104	K7(Lys8); M10(Oxidation); K24(Lys8)	0	6.92496e+06	0.99541	4	6.07717	0	0.0001725	24.89	0.643814	3	2547.41	0.898503	46.1551	0
	High	SGDAAIVDmVPGKPmcVESFSDYPPLGR	1	2	1	P68104	M9(Oxidation); M15(Oxidation); C16(Carbamidomethyl)	0	2.71264e+06	1.47896	1		0	0.0002595	17.96	15.9028	3	3027.39	1.56574	44.6131	0
	High	VETGVLKPGmVVTFAPVNVTTEVK	2	2	1	P68104	M10(Oxidation)	0	6.89412e+06				0	0.007302	11.15	18.7658	3	2531.39	4.18991	46.2313	0
	High	LPLQDVYk	2	2	1	P68104	K8(Lys8)	0	9.4666e+06	1.03322	1		0.001	0.03463	23.74	0.573561	2	983.566	0.353837	33.5723	0
	High	STTTGHLIYk	1	2	1	P68104	K10(Lys8)	0	5.10974e+06	0.795232	1		0.009	0.1083	19.06	2.28278	2	1128.61	0.449384	20.8963	0
P10809	60 kDa heat shock protein, mitochondrial OS=Homo sapiens GN=HSPD1 PE=1 SV=2 - [CH60_HUMAN]	644.209	13.96	1	6	6	30	3.19062e+06	0.838417	18	9.11273	573	61.0164	5.87158
	A2	Sequence	# PSMs	# Proteins	# Protein Groups	Protein Group Accessions	Modifications	ΔCn	Area	Light/Heavy	Light/Heavy Count	Light/Heavy Variability [%]	q-Value	PEP	IonScore	Exp Value	Charge	MH+ [Da]	ΔM [ppm]	RT [min]	# Missed Cleavages
	High	LVQDVANNTNEEAGDGTTTATVLAR	7	1	1	P10809		0	4.99243e+06	0.809215	2	5.01263	0	5.333e-08	110.7	6.298e-09	2	2560.25	-0.503564	35.0545	0
	High	LVQDVANNTNEEAGDGTTTATVLAr	6	1	1	P10809	R25(Arg10)	0	6.06769e+06	0.840962	4	1.11454	0	2.628e-07	82.91	3.81536e-06	2	2570.26	1.12554	34.921	0
	High	VGLQVVAVK	2	1	1	P10809		0	1.35024e+06	0.740185	1		0	0.001813	59.73	4.9323e-05	2	912.588	0.0929811	32.7699	0
	High	VGLQVVAVk	3	1	1	P10809	K9(Lys8)	0	1.8242e+06	0.804067	2	2.91686	0	0.009944	52.09	0.000179534	2	920.602	0.182576	32.736	0
	High	TLNDELEIIEGmK	1	1	1	P10809	M12(Oxidation)	0	810177	1.00869	1		0	0.00295	38.61	0.0453515	2	1520.75	0.0355562	44.8804	0
	High	LSDGVAVLk	2	1	1	P10809	K9(Lys8)	0	1.10879e+06	0.991501	2	19.3914	0	0.02074	36.95	0.0151781	2	909.55	0.388128	29.7236	0
	High	TVIIEQSWGSPk	3	1	1	P10809	K12(Lys8)	0	1.61744e+06	1.155	3	2.40633	0	0.01264	32.74	0.131111	2	1352.73	0.344524	36.2166	0
	High	GYISPYFINTSk	3	1	1	P10809	K12(Lys8)	0	1.65879e+06	0.813667	3	1.48571	0	0.00339	32.32	0.152308	2	1397.72	1.16649	40.6557	0
	High	TVIIEQSWGSPK	3	1	1	P10809		0	1.67997e+06				0	0.02235	25.79	0.623492	2	1344.72	0.738575	36.0384	0
P35579	Myosin-9 OS=Homo sapiens GN=MYH9 PE=1 SV=4 - [MYH9_HUMAN]	532.097	10.71	1	15	15	63	9.4134e+06	1.20616	38	19.9986	1960	226.392	5.60498
	A2	Sequence	# PSMs	# Proteins	# Protein Groups	Protein Group Accessions	Modifications	ΔCn	Area	Light/Heavy	Light/Heavy Count	Light/Heavy Variability [%]	q-Value	PEP	IonScore	Exp Value	Charge	MH+ [Da]	ΔM [ppm]	RT [min]	# Missed Cleavages
	High	ALELDSNLYr	2	1	1	P35579	R10(Arg10)	0	1.09549e+06	0.668618	2	20.2717	0	0.001776	56.92	0.000458093	2	1203.63	1.15461	37.223	0
	High	GAGDGsDEEVDGKADGAEAKPAE	6	1	1	P35579	S6(Phospho)	0	3.62256e+06	1.18076	4	1.8569	0	0.0001575	55.7	0.00077422	2	2254.9	1.51704	21.2087	1
	High	IAEFTTNLTEEEEK	3	1	1	P35579		0	1.17337e+06	1.57486	3	82.6764	0	0.002215	54.63	0.00113085	2	1653.79	2.6492	36.1726	0
	High	IAQLEEELEEEQGNTELINDr	3	1	1	P35579	R21(Arg10)	0	1.08503e+06	1.00583	2	10.638	0	7.28e-06	50.2	0.00718107	2	2482.18	-2.39601	45.2119	0
	High	LQVELDNVTGLLSQSDSK	2	1	1	P35579		0	349252	1.50105	2	16.2259	0	0.0001348	48.16	0.00640356	2	1946.01	2.68536	49.9386	0
	High	IAQLEEELEEEQGNTELINDR	4	1	1	P35579		0	1.03385e+06	1.47697	2	24.7929	0	8.903e-05	47.88	0.0121097	2	2472.18	4.39555	45.2639	0
	High	IIGLDQVAGmSETALPGAFk	3	1	1	P35579	M10(Oxidation); K20(Lys8)	0	1.1271e+06	1.02241	1		0	0.0007262	40.53	0.0355816	2	2042.08	2.82018	49.7032	0
	High	AGVLAHLEEEr	1	1	1	P35579	R11(Arg10)	0	443430	5.4969	1		0	0.007867	38.35	0.0342223	2	1233.65	0.557603	31.8043	0
	High	KGAGDGsDEEVDGKADGAEAKPAE	3	1	1	P35579	S7(Phospho)	0	1.12669e+07	1.20281	3	0.547811	0	0.007209	36.35	0.103228	2	2382.99	0.00146953	19.3943	2
	High	IAEFTTNLTEEEEk	2	1	1	P35579	K14(Lys8)	0	1.06151e+06				0	0.001779	35.51	0.101453	2	1661.8	0.923552	36.1664	0
	High	IIGLDQVAGmSETALPGAFK	4	1	1	P35579	M10(Oxidation)	0	1.30597e+06	1.34564	2	2.4039	0	0.000658	35	0.140152	2	2034.06	2.25025	49.6577	0
	High	GAGDGsDEEVDGkADGAEAkPAE	6	1	1	P35579	S6(Phospho); K13(Lys8); K20(Lys8)	0	3.00683e+06	1.20545	2	1.87445	0	0.002766	34.85	0.11727	2	2270.93	1.47212	21.4674	1
	High	LQVELDNVTGLLSQSDSk	2	1	1	P35579	K18(Lys8)	0	362273	0.840274	1		0	0.00694	34.59	0.135522	2	1954.03	2.40459	50.1037	0
	High	IAQLEEQLDNETk	2	1	1	P35579	K13(Lys8)	0	909204	0.979835	1		0	0.0008861	33.99	0.135449	2	1538.78	0.711294	33.5333	0
	High	NLPIYSEEIVEmYk	2	1	1	P35579	M12(Oxidation); K14(Lys8)	0	303071	1.39675	1		0	0.002073	32.46	0.236042	2	1751.86	-1.5703	46.119	0
	High	IAQLEEQLDNETK	3	1	1	P35579		0	977982	1.21737	2	9.13061	0	0.001166	29.22	0.380264	2	1530.76	-0.455776	33.5515	0
	High	QLLQANPILEAFGNAK	4	1	1	P35579		0	271766	1.00009	1		0	0.00232	28.14	0.389793	2	1726.95	0.66325	54.6879	0
	High	NFINNPLAQADWAAK	1	1	1	P35579		0	454138	1.29846	1		0	0.0006622	23.35	1.75289	2	1672.85	1.10927	47.7151	0
	High	AGVLAHLEEER	1	1	1	P35579		0	1.77915e+06	3.80333	1		0	0.006709	22.22	1.32194	2	1223.64	0.03739	31.7476	0
	High	NLPIYSEEIVEmYK	3	1	1	P35579	M12(Oxidation)	0	548518	1.88151	2	11.053	0	0.009428	18.05	6.19807	2	1743.86	3.27478	46.0884	0
	High	QLLQANPILEAFGNAk	1	1	1	P35579	K16(Lys8)	0	207471				0.001	0.02385	16.13	5.88366	2	1734.96	-2.17657	54.7211	0
	High	mQQNIQELEEQLEEEESAR	2	1	1	P35579	M1(Oxidation)	0	444515	6.93174	2	5030.55	0.001	0.03104	14.79	20.3733	2	2349.06	2.13432	45.7299	0
	High	kGAGDGsDEEVDGk	1	1	1	P35579	K1(Lys8); S7(Phospho); K14(Lys8)	0	1.33508e+07	1.20464	1		0.005	0.08287	34.31	0.0528961	2	1459.59	-2.78988	15.8684	1
	High	kGAGDGsDEEVDGkADGAEAkPAE	1	1	1	P35579	K1(Lys8); S7(Phospho); K14(Lys8); K21(Lys8)	0	9.25436e+06				0.006	0.1004	20.21	5.09651	2	2407.04	1.17018	18.8763	2
	High	NTDQASmPDNTAAQK	1	1	1	P35579	M7(Oxidation)	0	305597	1.37037	1		0.006	0.09895	10.13	22.4285	2	1607.7	-0.356895	13.6434	0
P50990-2	Isoform 2 of T-complex protein 1 subunit theta OS=Homo sapiens GN=CCT8 - [TCPQ_HUMAN]	471.243	16.45	2	7	7	22	1.84926e+06	0.839407	15	24.3709	529	57.6084	5.38916
	A2	Sequence	# PSMs	# Proteins	# Protein Groups	Protein Group Accessions	Modifications	ΔCn	Area	Light/Heavy	Light/Heavy Count	Light/Heavy Variability [%]	q-Value	PEP	IonScore	Exp Value	Charge	MH+ [Da]	ΔM [ppm]	RT [min]	# Missed Cleavages
	High	AIADTGANVVVTGGk	3	2	1	P50990-2	K15(Lys8)	0	1.71096e+06	0.900286	2	13.7032	0	0.000244	79.04	2.85588e-06	2	1380.76	0.457625	29.3295	0
	High	AIADTGANVVVTGGK	4	2	1	P50990-2		0	1.49429e+06	0.958074	1		0	2.745e-05	73.74	1.02265e-05	2	1372.74	1.11106	29.2241	0
	High	LFVTNDAATILr	3	2	1	P50990-2	R12(Arg10)	0	2.44684e+06	0.524536	3	15.6141	0	0.00809	62.57	0.000105413	2	1343.76	-0.163376	44.1922	0
	High	FAEAFEAIPR	3	2	1	P50990-2		0	1.26004e+06	1.15156	3	7.12114	0	0.008861	59.02	0.00022638	2	1150.59	0.493641	39.8513	0
	High	LATNAAVTVLr	2	2	1	P50990-2	R11(Arg10)	0	1.38999e+06	0.923528	1		0	0.0002842	47.32	0.00172842	2	1138.68	0.0632875	33.3111	0
	High	LATNAAVTVLR	2	2	1	P50990-2		0	1.13887e+06	0.722253	1		0	0.004007	46.38	0.00228763	2	1128.67	0.468306	33.3393	0
	High	DIDEVSSLLr	3	2	1	P50990-2	R10(Arg10)	0	959641	0.839407	3	12.4847	0.001	0.02712	29.33	0.234354	2	1156.61	0.444418	43.6368	0
	High	QITSYGETcPGLEQYAIk	1	2	1	P50990-2	C9(Carbamidomethyl); K18(Lys8)	0	170284				0.001	0.02848	11.85	35.3442	2	2066.01	4.1247	40.2938	0
	High	HFSGLEEAVYr	1	2	1	P50990-2	R11(Arg10)	0	802128	0.780437	1		0.002	0.05554	19.04	2.8116	2	1317.65	1.00045	33.1694	0
P29401	Transketolase OS=Homo sapiens GN=TKT PE=1 SV=3 - [TKT_HUMAN]	447.462	20.39	2	7	7	44	5.86505e+06	1.37042	24	22.6006	623	67.8347	7.66455
	A2	Sequence	# PSMs	# Proteins	# Protein Groups	Protein Group Accessions	Modifications	ΔCn	Area	Light/Heavy	Light/Heavy Count	Light/Heavy Variability [%]	q-Value	PEP	IonScore	Exp Value	Charge	MH+ [Da]	ΔM [ppm]	RT [min]	# Missed Cleavages
	High	TSrPENAIIYNNNEDFQVGQAk	3	2	1	P29401	R3(Arg10); K22(Lys8)	0	9.03453e+06	1.1175	2	3.69675	0	1.79e-06	62.64	0.000397814	3	2526.24	0.532153	35.3377	0
	High	ILATPPQEDAPSVDIANIR	7	2	1	P29401		0	3.76361e+06	1.75737	3	2.61216	0	5.355e-05	59.25	0.000429465	2	2020.08	2.13541	42.9612	0
	High	ILATPPQEDAPSVDIANIr	6	2	1	P29401	R19(Arg10)	0	2.18122e+06	1.55597	3	0.681355	0	7.437e-05	54.87	0.0011911	2	2030.08	1.35884	43.0531	0
	High	TSRPENAIIYNNNEDFQVGQAK	4	2	1	P29401		0	1.03509e+07	1.13865	2	3.3153	0	4.798e-05	53.05	0.00370374	3	2508.22	1.60949	35.3311	0
	High	SVPTSTVFYPSDGVATEK	4	2	1	P29401		0	3.48069e+06	1.3281	2	8.29216	0	0.001369	40.98	0.0372185	2	1884.92	-1.14782	37.5805	0
	High	VLDPFTIKPLDR	4	2	1	P29401		0	860569	1.28399	3	10.859	0	0.008494	38.1	0.0247733	2	1413.81	0.262485	44.9671	0
	High	SVPTSTVFYPSDGVATEk	4	2	1	P29401	K18(Lys8)	0	2.3266e+06	1.42934	1		0	0.005807	25.62	1.25633	2	1892.94	-0.196168	37.4643	0
	High	QAFTDVATGSLGQGLGAAcGmAYTGK	3	2	1	P29401	C19(Carbamidomethyl); M21(Oxidation)	0	1.16078e+06	1.06631	2	29.5731	0	0.0009139	20.49	6.85031	3	2548.19	1.81212	43.5299	0
	High	QAFTDVATGSLGQGLGAAcGmAYTGk	2	2	1	P29401	C19(Carbamidomethyl); M21(Oxidation); K26(Lys8)	0	483322	0.883055	1		0	0.008116	15.8	20.2307	3	2556.21	4.15509	43.419	0
	High	VLDPFTIkPLDr	2	2	1	P29401	K8(Lys8); R12(Arg10)	0	558084				0.001	0.03024	26.44	0.27193	2	1431.83	1.02154	44.8747	0
	High	ISSDLDGHPVPk	1	2	1	P29401	K12(Lys8)	0	903917	1.3373	1		0.002	0.05173	25.8	0.597728	3	1272.67	-0.764754	24.3699	0
	High	LGQSDPAPLQHQmDIYQK	1	2	1	P29401	M13(Oxidation)	0	2.86043e+06	2.1463	1		0.003	0.06255	14.51	19.3123	3	2085.01	3.10627	29.8232	0
	High	LGQSDPAPLQHQmDIYQk	1	2	1	P29401	M13(Oxidation); K18(Lys8)	0	1.08725e+06	1.47862	1		0.005	0.0834	18.74	7.15947	3	2093.02	1.0637	29.8528	0
	High	ISSDLDGHPVPK	2	2	1	P29401		0	1.06841e+06	1.27622	2	21.468	0.005	0.09589	11.75	14.9676	2	1264.65	0.767881	24.3377	0
B4DUR8	T-complex protein 1 subunit gamma OS=Homo sapiens GN=CCT3 PE=1 SV=1 - [B4DUR8_HUMAN]	397.75	11.6	3	5	5	19	1.48871e+06	0.992721	13	13.843	500	55.6387	5.64307
	A2	Sequence	# PSMs	# Proteins	# Protein Groups	Protein Group Accessions	Modifications	ΔCn	Area	Light/Heavy	Light/Heavy Count	Light/Heavy Variability [%]	q-Value	PEP	IonScore	Exp Value	Charge	MH+ [Da]	ΔM [ppm]	RT [min]	# Missed Cleavages
	High	TAVETAVLLLR	3	3	1	B4DUR8		0	1.02819e+06	0.924094	1		0	0.001133	64.86	2.48207e-05	2	1185.72	0.866734	47.0033	0
	High	TAVETAVLLLr	3	3	1	B4DUR8	R11(Arg10)	0	1.02521e+06	0.955033	2	5.74296	0	0.001212	62.84	4.54996e-05	2	1195.73	0.681881	47.0536	0
	High	IPGGIIEDScVLr	3	3	1	B4DUR8	C10(Carbamidomethyl); R13(Arg10)	0	1.11245e+06	1.22417	1		0	0.0004351	59.61	0.000282077	2	1438.76	1.48474	40.9297	0
	High	IPGGIIEDScVLR	3	3	1	B4DUR8	C10(Carbamidomethyl)	0	1.33512e+06	1.15097	2	2.83327	0	0.001406	51.27	0.0019975	2	1428.75	0.960268	41.0464	0
	High	AVAQALEVIPr	3	3	1	B4DUR8	R11(Arg10)	0	1.94078e+06	1.02295	3	16.4351	0	0.0002982	50.47	0.00110339	2	1176.7	0.446457	38.7556	0
	High	TLIQNcGASTIR	3	3	1	B4DUR8	C6(Carbamidomethyl)	0	1.19022e+06	0.970355	3	17.2829	0	0.00537	23.98	1.02926	2	1333.69	1.23737	28.0597	0
	High	IVLLDSSLEYk	1	3	1	B4DUR8	K11(Lys8)	0	782645	0.590375	1		0.001	0.04326	39.17	0.0204591	2	1287.73	1.26727	43.0735	0
P13645	Keratin, type I cytoskeletal 10 OS=Homo sapiens GN=KRT10 PE=1 SV=6 - [K1C10_HUMAN]	389.103	10.79	1	4	4	18	6.88384e+06	99.561	16	0.652327	584	58.7917	5.21143
	A2	Sequence	# PSMs	# Proteins	# Protein Groups	Protein Group Accessions	Modifications	ΔCn	Area	Light/Heavy	Light/Heavy Count	Light/Heavy Variability [%]	q-Value	PEP	IonScore	Exp Value	Charge	MH+ [Da]	ΔM [ppm]	RT [min]	# Missed Cleavages
	High	GSLGGGFSSGGFSGGSFSR	4	1	1	P13645		0	1.0859e+07	100	3	0	0	3.985e-05	84.83	1.12895e-06	2	1707.77	0.948609	39.4317	0
	High	ISSSKGSLGGGFSSGGFSGGSFSR	7	1	1	P13645		0	7.99476e+06	100	6	0	0	8.439e-08	56.4	0.00138197	3	2210.05	0.0439668	36.8911	1
	High	ALEESNYELEGK	2	1	1	P13645		0	803550	96.3468	2	5.5219	0	0.002335	32.64	0.127277	2	1381.65	0.102579	28.7547	0
	High	NVSTGDVNVEmNAAPGVDLTQLLNNmR	5	1	1	P13645	M11(Oxidation); M26(Oxidation)	0	1.7978e+06	75.0954	5	34.328	0	0.0001876	28.54	1.29175	3	2904.39	0.789364	49.7875	0
P26038	Moesin OS=Homo sapiens GN=MSN PE=1 SV=3 - [MOES_HUMAN]	371.527	11.61	1	4	4	18	1.45626e+06	1.34122	9	15.715	577	67.7778	6.40479
	A2	Sequence	# PSMs	# Proteins	# Protein Groups	Protein Group Accessions	Modifications	ΔCn	Area	Light/Heavy	Light/Heavy Count	Light/Heavy Variability [%]	q-Value	PEP	IonScore	Exp Value	Charge	MH+ [Da]	ΔM [ppm]	RT [min]	# Missed Cleavages
	High	APDFVFYAPr	3	1	1	P26038	R10(Arg10)	0	1.28002e+06	1.56689	2	23.3665	0	0.000463	67.37	3.90741e-05	2	1192.6	0.14123	43.1119	0
	High	APDFVFYAPR	3	1	1	P26038		0	1.88391e+06	1.52388	1		0	0.003127	60.65	0.000178484	2	1182.6	0.838108	43.1848	0
	High	ALTSELANAr	3	1	1	P26038	R10(Arg10)	0	1.50279e+06	1.05185	1		0	0.00182	59.99	0.000155608	2	1055.57	0.440514	28.1608	0
	High	ALTSELANAR	3	1	1	P26038		0	1.70714e+06	1.24552	2	4.64659	0	0.002929	59	0.000196141	2	1045.56	-0.169419	28.1491	0
	High	IAQDLEmYGVNYFSIK	3	1	1	P26038	M7(Oxidation)	0	755119	1.39338	2	0.510068	0	4.133e-05	47.43	0.00901328	2	1906.93	2.23441	48.888	0
	High	IAQDLEmYGVNYFSIk	2	1	1	P26038	M7(Oxidation); K16(Lys8)	0	777725	0.726403	1		0	0.0005434	42.19	0.0293761	2	1914.94	0.674871	48.9694	0
	High	TAmSTPHVAEPAENEQDEQDENGAEASADLR	1	1	1	P26038	M3(Oxidation)	0	0				0	0.002187	17.82	15.0114	3	3328.42	0.84519	30.3052	0
Q13283	Ras GTPase-activating protein-binding protein 1 OS=Homo sapiens GN=G3BP1 PE=1 SV=1 - [G3BP1_HUMAN]	364.813	9.66	1	2	2	25	2.30354e+07	0.852768	12	5.75267	466	52.1321	5.51611
	A2	Sequence	# PSMs	# Proteins	# Protein Groups	Protein Group Accessions	Modifications	ΔCn	Area	Light/Heavy	Light/Heavy Count	Light/Heavy Variability [%]	q-Value	PEP	IonScore	Exp Value	Charge	MH+ [Da]	ΔM [ppm]	RT [min]	# Missed Cleavages
	High	SSsPAPADIAQTVQEDLR	8	1	1	Q13283	S3(Phospho)	0	3.15173e+07	0.819627	5	4.26558	0	4.083e-05	81.5	3.13443e-06	2	1964.9	2.04172	48.8589	0
	High	SSsPAPADIAQTVQEDLr	6	1	1	Q13283	S3(Phospho); R18(Arg10)	0	3.79491e+07	0.82835	1		0	8.091e-06	78.56	6.25179e-06	2	1974.91	1.42936	49.0265	0
	High	YQDEVFGGFVTEPQEEsEEEVEEPEER	6	1	1	Q13283	S17(Phospho)	0	7.29467e+06	0.876703	4	2.37702	0	0.001167	52.9	0.00340694	2	3296.34	1.47469	47.8646	0
	High	YQDEVFGGFVTEPQEEsEEEVEEPEEr	5	1	1	Q13283	S17(Phospho); R27(Arg10)	0	8.12171e+06	0.887696	2	0.332398	0	0.005175	41.58	0.0462226	2	3306.35	3.252	47.7811	0
P04075	Fructose-bisphosphate aldolase A OS=Homo sapiens GN=ALDOA PE=1 SV=2 - [ALDOA_HUMAN]	337.56	23.35	3	6	6	18	3.45277e+06	0.848914	10	7.63084	364	39.3953	8.08936
	A2	Sequence	# PSMs	# Proteins	# Protein Groups	Protein Group Accessions	Modifications	ΔCn	Area	Light/Heavy	Light/Heavy Count	Light/Heavy Variability [%]	q-Value	PEP	IonScore	Exp Value	Charge	MH+ [Da]	ΔM [ppm]	RT [min]	# Missed Cleavages
	High	GILAADESTGSIAK	3	3	1	P04075		0	4.26229e+06	0.848914	2	0.0402987	0	5.119e-05	75.53	7.33473e-06	2	1332.7	-0.00163413	31.173	0
	High	YTPSGQAGAAASESLFVSNHAY	3	3	1	P04075		0	2.75904e+06				0	6.706e-06	65.99	0.000151061	2	2228.03	2.26383	41.4835	0
	High	GILAADESTGSIAk	3	3	1	P04075	K14(Lys8)	0	4.90855e+06	0.901003	1		0	0.0004207	63.35	0.000114509	2	1340.72	1.15303	31.3164	0
	High	IGEHTPSALAImENANVLAr	2	3	1	P04075	M12(Oxidation); R20(Arg10)	0	1.31436e+06	0.826408	2	2.42722	0	0.005747	40.43	0.0437831	3	2133.1	0.00951557	39.4904	0
	High	QLLLTADDR	1	3	1	P04075		0	1.42345e+06	0.786269	1		0	0.02024	36.68	0.0283836	2	1044.57	0.541874	31.3675	0
	High	IGEHTPSALAImENANVLAR	2	3	1	P04075	M12(Oxidation)	0	1.34873e+06	0.545973	1		0	0.001943	14.66	16.0337	3	2123.1	3.07064	39.7887	0
	High	PYQYPALTPEQk	2	2	1	P04075	K12(Lys8)	0	1.8189e+06	1.28365	1		0.001	0.03532	16.66	6.20999	2	1442.74	1.05544	32.7479	0
	High	PYQYPALTPEQK	1	2	1	P04075		0	2.69073e+06	1.47931	1		0.002	0.05984	22.47	1.63955	2	1434.73	0.577915	32.7087	0
	High	ELSDIAHr	1	3	1	P04075	R8(Arg10)	0	774150	0.877806	1		0.004	0.07096	13.3	5.64089	2	950.493	-0.206088	20.3269	0
P13639	Elongation factor 2 OS=Homo sapiens GN=EEF2 PE=1 SV=4 - [EF2_HUMAN]	325.8	12.7	1	9	9	25	2.82067e+06	0.908519	16	18.676	858	95.277	6.82959
	A2	Sequence	# PSMs	# Proteins	# Protein Groups	Protein Group Accessions	Modifications	ΔCn	Area	Light/Heavy	Light/Heavy Count	Light/Heavy Variability [%]	q-Value	PEP	IonScore	Exp Value	Charge	MH+ [Da]	ΔM [ppm]	RT [min]	# Missed Cleavages
	High	VNFTVDQIr	3	1	1	P13639	R9(Arg10)	0	1.97391e+06	0.735231	3	10.2822	0	0.01014	55.59	0.000481859	2	1101.59	-0.7769	35.306	0
	High	VFSGLVSTGLk	3	1	1	P13639	K11(Lys8)	0	2.014e+06	0.913041	3	10.7845	0	0.004973	53.94	0.000516061	2	1115.66	0.535064	38.2084	0
	High	VNFTVDQIR	3	1	1	P13639		0	1.92995e+06				0	0.01909	44.25	0.00675192	2	1091.59	0.528806	35.53	0
	High	VFSGLVSTGLK	3	1	1	P13639		0	1.79382e+06				0	0.005034	43.17	0.00591832	2	1107.64	1.01483	38.214	0
	High	YEWDVAEAR	3	1	1	P13639		0	947899	0.788558	3	12.5442	0	0.007912	37.43	0.0232222	2	1138.52	-0.0055154	34.4698	0
	High	ETVSEESNVLcLSK	1	1	1	P13639	C11(Carbamidomethyl)	0	1.26057e+06	1.03101	1		0	0.0009987	36.84	0.0677661	2	1594.76	0.868169	35.6342	0
	High	GGGQIIPTAR	1	1	1	P13639		0	2.01405e+06	1.01785	1		0	0.02307	32.02	0.0800774	2	969.548	0.811901	25.1975	0
	High	GHVFEESQVAGTPmFVVK	1	1	1	P13639	M14(Oxidation)	0	0				0	0.00923	17.67	8.24569	2	1977.97	-0.334736	38.245	0
	High	STLTDSLVck	3	1	1	P13639	C9(Carbamidomethyl); K10(Lys8)	0	1.48356e+06	7.74309	2	24.1628	0.001	0.02787	36.13	0.0473667	2	1131.58	0.233166	31.3409	0
	High	ETVSEESNVLcLSk	1	1	1	P13639	C11(Carbamidomethyl); K14(Lys8)	0	1.23331e+06	0.925563	1		0.001	0.02588	13.35	16.1094	2	1602.78	1.14424	35.6106	0
	High	STLTDSLVcK	1	1	1	P13639	C9(Carbamidomethyl)	0	3967858	4.43442	1		0.002	0.05745	41.14	0.0149327	2	1123.57	-0.273827	31.3247	0
	High	FSVSPVVr	1	1	1	P13639	R8(Arg10)	0	2.48009e+06	0.803127	1		0.004	0.06803	23.67	0.491175	2	900.518	0.0760998	31.8087	0
	High	ArPFPDGLAEDIDkGEVSAr	1	1	1	P13639	R2(Arg10); K14(Lys8); R20(Arg10)	0	0				0.009	0.1101	18.08	8.14237	3	2171.11	1.56897	39.9176	1
P22314-2	Isoform 2 of Ubiquitin-like modifier-activating enzyme 1 OS=Homo sapiens GN=UBA1 - [UBA1_HUMAN]	317.77	10.41	2	7	7	35	1.28603e+06	1.22243	18	33.3761	1018	113.728	5.60498
	A2	Sequence	# PSMs	# Proteins	# Protein Groups	Protein Group Accessions	Modifications	ΔCn	Area	Light/Heavy	Light/Heavy Count	Light/Heavy Variability [%]	q-Value	PEP	IonScore	Exp Value	Charge	MH+ [Da]	ΔM [ppm]	RT [min]	# Missed Cleavages
	High	LQTSSVLVSGLR	3	2	1	P22314-2		0	1.2647e+06	1.2435	2	3.26502	0	0.01075	56.22	0.000332383	2	1259.73	0.894201	37.4345	0
	High	LAGTQPLEVLEAVQr	4	2	1	P22314-2	R15(Arg10)	0	1.29508e+06	0.860406	1		0	0.002316	53.27	0.000949019	2	1633.92	2.04301	48.5471	0
	High	LAGTQPLEVLEAVQR	3	2	1	P22314-2		0	1.25425e+06	1.05452	2	21.9809	0	0.001991	53.06	0.00101433	2	1623.91	1.88569	48.6308	0
	High	ALPAVQQNNLDEDLIr	4	2	1	P22314-2	R16(Arg10)	0	1.03938e+06	1.25222	2	3.38816	0	0.001844	39.95	0.0363713	2	1818.97	3.80399	42.0408	0
	High	NEEDAAELVALAQAVNAR	3	2	1	P22314-2		0	861185	1.03405	2	15.642	0	0.000103	39.7	0.0483523	2	1883.94	-0.714296	51.1664	0
	High	NEEDAAELVALAQAVNAr	4	2	1	P22314-2	R18(Arg10)	0	698599	1.23487	1		0	0.0008056	34.22	0.160573	2	1893.96	1.691	51.112	0
	High	DNPGVVTcLDEAR	2	2	1	P22314-2	C8(Carbamidomethyl)	0	819042	1.31829	2	39.5006	0	0.0031	33.36	0.113	2	1445.67	0.420541	33.4347	0
	High	SLVASLAEPDFVVTDFAK	3	2	1	P22314-2		0	409417	0.971521	1		0	0.002345	32.83	0.209155	2	1909	1.46425	56.2236	0
	High	SLVASLAEPDFVVTDFAk	2	2	1	P22314-2	K18(Lys8)	0	555407	0.737148	1		0	0.002739	31.4	0.267534	2	1917.01	1.62889	56.1861	0
	High	LQTSSVLVSGLr	3	2	1	P22314-2	R12(Arg10)	0	898780	1.69341	1		0	0.01408	22.71	0.747704	2	1269.74	0.623769	37.3436	0
	High	QPAENVNQYLTDPK	4	2	1	P22314-2		0	1.29831e+06	1.75231	3	7.44168	0	0.01473	14.54	12.6527	2	1616.79	2.05104	33.5392	0
P19338	Nucleolin OS=Homo sapiens GN=NCL PE=1 SV=3 - [NUCL_HUMAN]	289.26	11.27	1	8	8	27	2.46261e+06	0.868091	17	10.0735	710	76.5684	4.70361
	A2	Sequence	# PSMs	# Proteins	# Protein Groups	Protein Group Accessions	Modifications	ΔCn	Area	Light/Heavy	Light/Heavy Count	Light/Heavy Variability [%]	q-Value	PEP	IonScore	Exp Value	Charge	MH+ [Da]	ΔM [ppm]	RT [min]	# Missed Cleavages
	High	EVFEDAAEIR	3	1	1	P19338		0	1.60519e+06	0.93792	3	19.6256	0	0.006373	65.69	4.68597e-05	2	1178.57	-0.38549	33.7498	0
	High	NDLAVVDVR	3	1	1	P19338		0	2.00623e+06	0.856587	3	2.50932	0	0.01376	49.69	0.00149714	2	1000.54	-0.384411	31.9463	0
	High	GFGFVDFNSEEDAK	3	1	1	P19338		0	1.37129e+06	0.800698	2	12.0245	0	0.0006086	46.41	0.00517574	2	1561.68	1.31492	44.4653	0
	High	NDLAVVDVr	3	1	1	P19338	R9(Arg10)	0	2.4836e+06				0	0.008618	37.3	0.0264044	2	1010.55	-0.0471646	31.941	0
	High	GFGFVDFNSEEDAk	3	1	1	P19338	K14(Lys8)	0	1.72086e+06	0.715333	1		0	0.009423	24.42	0.851301	2	1569.7	1.90559	44.1778	0
	High	TGISDVFAk	3	1	1	P19338	K9(Lys8)	0	2.55093e+06	0.882312	3	4.86001	0.001	0.03644	39.89	0.0132514	2	945.512	-0.710228	35.0165	0
	High	GIAYIEFK	2	1	1	P19338		0	1.72821e+06	1.00867	2	33.1616	0.001	0.0275	37.37	0.02841	2	940.514	0.606685	39.0073	0
	High	EVFEDAAEIr	1	1	1	P19338	R10(Arg10)	0	1.43511e+06				0.001	0.04367	32.17	0.119982	2	1188.58	0.260712	33.9163	0
	High	TGISDVFAK	3	1	1	P19338		0	2.25072e+06				0.001	0.02556	31.64	0.0873655	2	937.499	-0.023823	35.2777	0
	High	GLSEDTTEETLkESFDGSVr	1	1	1	P19338	K12(Lys8); R20(Arg10)	0	559556	1.04907	1		0.001	0.03284	23.92	2.49915	3	2218.05	1.05213	41.0548	1
	High	SISLYYTGEK	1	1	1	P19338		0	2.3533e+06	0.889491	1		0.003	0.06316	37.07	0.0364792	2	1160.58	0.333051	33.9594	0
	High	GLSEDTTEETLk	1	1	1	P19338	K12(Lys8)	0	1.11931e+06	0.856556	1		0.005	0.08843	12.08	14.9192	2	1330.65	0.344107	26.988	0
A0A087WUT6	Eukaryotic translation initiation factor 5B OS=Homo sapiens GN=EIF5B PE=1 SV=1 - [A0A087WUT6_HUMAN]	270.48	2.95	2	2	2	13	1.26402e+07	1.08058	7	2.96739	1220	138.597	5.57959
	A2	Sequence	# PSMs	# Proteins	# Protein Groups	Protein Group Accessions	Modifications	ΔCn	Area	Light/Heavy	Light/Heavy Count	Light/Heavy Variability [%]	q-Value	PEP	IonScore	Exp Value	Charge	MH+ [Da]	ΔM [ppm]	RT [min]	# Missed Cleavages
	High	NKPGPNIEsGNEDDDASFK	6	2	1	A0A087WUT6	S9(Phospho)	0	2.29052e+07	1.08058	3	3.63323	0	7.514e-06	71.19	2.42696e-05	2	2113.88	1.98188	28.2285	0
	High	NkPGPNIEsGNEDDDASFk	6	2	1	A0A087WUT6	K2(Lys8); S9(Phospho); K19(Lys8)	0	2.05423e+07	1.08686	3	2.10764	0	8.779e-05	50	0.003773	2	2129.9	2.38899	27.7661	0
	High	QSFDDNDsEELEDkDSk	1	2	1	A0A087WUT6	S8(Phospho); K14(Lys8); K17(Lys8)	0	2.37516e+06	0.823534	1		0.002	0.05906	15.29	7.01936	2	2096.82	0.272378	25.8569	1
P04264	Keratin, type II cytoskeletal 1 OS=Homo sapiens GN=KRT1 PE=1 SV=6 - [K2C1_HUMAN]	256.237	13.51	1	5	6	15	7.50138e+06	100	14	0	644	65.999	8.11865
	A2	Sequence	# PSMs	# Proteins	# Protein Groups	Protein Group Accessions	Modifications	ΔCn	Area	Light/Heavy	Light/Heavy Count	Light/Heavy Variability [%]	q-Value	PEP	IonScore	Exp Value	Charge	MH+ [Da]	ΔM [ppm]	RT [min]	# Missed Cleavages
	High	FLEQQNQVLQTK	4	2	2	P04264;P35908		0	1.97298e+06	100	3	0	0	0.001781	60.52	0.000242903	2	1475.79	0.499423	31.6273	0
	High	SGGGFSSGSAGIINYQR	3	1	1	P04264		0	1.21643e+06	100	3	0	0	0.001949	49.81	0.00392919	2	1657.8	1.88612	34.8786	0
	High	GGGGGGYGSGGSSYGSGGGSYGSGGGGGGGR	3	1	1	P04264		0	846180	60.2751	3	6.72447	0	2.24e-05	38.11	0.0530022	2	2383.96	1.52801	21.818	0
	High	SLVNLGGSKSISISVAR	3	1	1	P04264		0	1.19612e+06	100	3	0	0	0.004732	37.79	0.024369	3	1687.97	0.865835	39.9556	1
	High	YEELQITAGR	1	1	1	P04264		0	625047	97.4141	1		0	0.004986	31.98	0.126711	2	1179.6	-1.41473	31.7052	0
	High	SISISVAR	1	1	1	P04264		0	1.93147e+07	100	1		0.009	0.1077	33.07	0.04732	2	832.489	0.396366	27.976	0
Q00839-2	Isoform Short of Heterogeneous nuclear ribonucleoprotein U OS=Homo sapiens GN=HNRNPU - [HNRPU_HUMAN]	250.191	5.58	2	3	3	12	1.59363e+06	0.891984	7	12.1744	806	88.9242	5.78271
	A2	Sequence	# PSMs	# Proteins	# Protein Groups	Protein Group Accessions	Modifications	ΔCn	Area	Light/Heavy	Light/Heavy Count	Light/Heavy Variability [%]	q-Value	PEP	IonScore	Exp Value	Charge	MH+ [Da]	ΔM [ppm]	RT [min]	# Missed Cleavages
	High	NFILDQTNVSAAAQr	3	2	1	Q00839-2	R15(Arg10)	0	2.23783e+06	0.972651	2	0.706166	0	4.783e-05	78.41	5.07048e-06	2	1657.86	1.66138	38.4715	0
	High	NFILDQTNVSAAAQR	3	2	1	Q00839-2		0	1.76846e+06	0.786606	1		0	5.863e-05	71.84	2.35276e-05	2	1647.85	0.689163	38.3511	0
	High	SSGPTSLFAVTVAPPGAr	2	2	1	Q00839-2	R18(Arg10)	0	1.76424e+06	0.891984	1		0	0.01646	24.76	1.099	2	1724.92	0.330378	45.8718	0
	High	SSGPTSLFAVTVAPPGAR	2	2	1	Q00839-2		0	1.63771e+06	0.928281	1		0	0.001275	23.18	1.62476	2	1714.92	1.7374	45.8981	0
	High	YNILGTNTImDk	2	2	1	Q00839-2	M10(Oxidation); K12(Lys8)	0	778828	0.616761	2	46.4113	0	0.003536	16.15	6.66711	2	1406.71	1.54196	36.186	0
K7EQ48	Glucose-6-phosphate isomerase OS=Homo sapiens GN=GPI PE=1 SV=2 - [K7EQ48_HUMAN]	242.951	12.03	1	4	4	19	2.79736e+06	1.14657	9	29.4977	474	53.3682	8.67529
	A2	Sequence	# PSMs	# Proteins	# Protein Groups	Protein Group Accessions	Modifications	ΔCn	Area	Light/Heavy	Light/Heavy Count	Light/Heavy Variability [%]	q-Value	PEP	IonScore	Exp Value	Charge	MH+ [Da]	ΔM [ppm]	RT [min]	# Missed Cleavages
	High	TFTTQETITNAETAK	3	1	1	K7EQ48		0	1.39258e+06	0.939487	2	0.648576	0	1.898e-05	70.81	3.06339e-05	2	1655.81	0.867852	31.0996	0
	High	TLAQLNPESSLFIIASK	4	1	1	K7EQ48		0	2.17966e+06	1.85176	2	20.9259	0	9.088e-06	49.87	0.00239359	2	1832.02	0.496875	54.2939	0
	High	TFTTQETITNAETAk	3	1	1	K7EQ48	K15(Lys8)	0	1.39597e+06	1.02685	1		0	0.0001279	44.18	0.0147698	2	1663.83	0.766959	31.1602	0
	High	TLAQLNPESSLFIIASk	5	1	1	K7EQ48	K17(Lys8)	0	1.11112e+06	1.85521	1		0	7.412e-05	37.67	0.0354572	2	1840.03	1.40238	54.2176	0
	High	VWYVSNIDGTHIAK	1	1	1	K7EQ48		0	972150	1.06081	1		0	0.01926	30.02	0.323955	3	1602.83	0.512193	38.1267	0
	High	VWYVSNIDGTHIAk	1	1	1	K7EQ48	K14(Lys8)	0	764594				0	0.009867	15.74	8.70196	3	1610.84	0.826543	38.1206	0
	High	HFVALSTNTTk	2	1	1	K7EQ48	K11(Lys8)	0	4.81646e+06	1.24467	2	12.2158	0.001	0.03076	23.4	0.986396	2	1226.66	1.26314	24.0319	0
C9J9K3	40S ribosomal protein SA (Fragment) OS=Homo sapiens GN=RPSA PE=1 SV=2 - [C9J9K3_HUMAN]	242.36	11.41	4	2	2	13	1.56247e+06	1.02304	6	18.7987	263	29.386	5.24951
	A2	Sequence	# PSMs	# Proteins	# Protein Groups	Protein Group Accessions	Modifications	ΔCn	Area	Light/Heavy	Light/Heavy Count	Light/Heavy Variability [%]	q-Value	PEP	IonScore	Exp Value	Charge	MH+ [Da]	ΔM [ppm]	RT [min]	# Missed Cleavages
	High	FAAATGATPIAGr	3	4	1	C9J9K3	R13(Arg10)	0	1.34232e+06	1.05057	2	2.17464	0	0.0005938	76.76	4.39438e-06	2	1213.66	0.426521	27.9302	0
	High	FAAATGATPIAGR	3	4	1	C9J9K3		0	1.48027e+06	1.01095	1		0	0.001938	53.08	0.00102787	2	1203.65	0.403664	27.9355	0
	High	AIVAIENPADVSVISSr	4	4	1	C9J9K3	R17(Arg10)	0	1.64466e+06	0.928476	2	48.0061	0	0.00515	44.35	0.00953098	2	1750.96	1.69875	43.4913	0
	High	AIVAIENPADVSVISSR	3	4	1	C9J9K3		0	1.24029e+06	0.701698	1		0	0.002818	25.32	0.796103	2	1740.95	0.217806	43.4791	0
P50991-2	Isoform 2 of T-complex protein 1 subunit delta OS=Homo sapiens GN=CCT4 - [TCPD_HUMAN]	235.069	8.45	2	3	3	14	1.19588e+06	1.20817	7	16.9433	509	54.6851	7.82568
	A2	Sequence	# PSMs	# Proteins	# Protein Groups	Protein Group Accessions	Modifications	ΔCn	Area	Light/Heavy	Light/Heavy Count	Light/Heavy Variability [%]	q-Value	PEP	IonScore	Exp Value	Charge	MH+ [Da]	ΔM [ppm]	RT [min]	# Missed Cleavages
	High	ALIAGGGAPEIELALr	3	2	1	P50991-2	R16(Arg10)	0	1.07887e+06	1.14813	2	16.7861	0	1.284e-05	54.55	0.000515605	2	1560.9	1.5146	48.7078	0
	High	VIDPATATSVDLr	3	2	1	P50991-2	R13(Arg10)	0	1.77276e+06	1.23103	3	2.77842	0	0.00105	52.36	0.00152712	2	1367.74	-0.970184	36.0271	0
	High	ALIAGGGAPEIELALR	4	2	1	P50991-2		0	1.20854e+06	1.07857	1		0	0.00132	47.27	0.00301968	2	1550.89	1.50388	48.7018	0
	High	VIDPATATSVDLR	3	2	1	P50991-2		0	2.0915e+06				0	0.0003797	43.89	0.00965675	2	1357.74	2.05611	35.9537	0
	High	ETLLNSATTSLNSk	1	2	1	P50991-2	K14(Lys8)	0	287580	1.04737	1		0	0.006122	19.83	2.79271	2	1486.78	-0.292871	35.8477	0
Q7Z6Z7-2	Isoform 2 of E3 ubiquitin-protein ligase HUWE1 OS=Homo sapiens GN=HUWE1 - [HUWE1_HUMAN]	218.25	1.03	3	2	2	11	3.04882e+06	1.17622	6	7.58755	4358	479.897	5.23682
	A2	Sequence	# PSMs	# Proteins	# Protein Groups	Protein Group Accessions	Modifications	ΔCn	Area	Light/Heavy	Light/Heavy Count	Light/Heavy Variability [%]	q-Value	PEP	IonScore	Exp Value	Charge	MH+ [Da]	ΔM [ppm]	RT [min]	# Missed Cleavages
	High	GSGTAsDDEFENLR	3	3	1	Q7Z6Z7-2	S6(Phospho)	0	3.47202e+06	1.14788	2	4.95734	0	0.004739	59.85	0.000126494	2	1577.61	1.08807	33.8042	0
	High	GSGTAsDDEFENLr	3	3	1	Q7Z6Z7-2	S6(Phospho); R14(Arg10)	0	3.12751e+06	1.12514	1		0	0.006378	55.7	0.000311949	2	1587.62	0.716782	33.6833	0
	High	REESPmDVDQPsPSAQDTQSIASDGTPQGEK	3	3	1	Q7Z6Z7-2	M6(Oxidation); S12(Phospho)	0	2.62562e+06	1.20824	2	5.32401	0	0.0002163	33.65	0.375227	3	3383.42	0.394154	29.3617	1
	High	rEESPmDVDQPSPsAQDTQSIASDGTPQGEk	2	3	1	Q7Z6Z7-2	R1(Arg10); M6(Oxidation); S14(Phospho); K31(Lys8)	0	2.18285e+06	1.29883	1		0.001	0.04509	15.28	27.2512	3	3401.45	1.32307	29.3999	1
P53396	ATP-citrate synthase OS=Homo sapiens GN=ACLY PE=1 SV=3 - [ACLY_HUMAN]	217.06	6.18	1	5	5	13	816425	0.665121	8	41.4458	1101	120.762	7.32764
	A2	Sequence	# PSMs	# Proteins	# Protein Groups	Protein Group Accessions	Modifications	ΔCn	Area	Light/Heavy	Light/Heavy Count	Light/Heavy Variability [%]	q-Value	PEP	IonScore	Exp Value	Charge	MH+ [Da]	ΔM [ppm]	RT [min]	# Missed Cleavages
	High	FIcTTSAIQNr	2	1	1	P53396	C3(Carbamidomethyl); R11(Arg10)	0	888448	0.532641	2	5.76318	0	0.01165	68.43	3.43297e-05	2	1320.66	1.28169	28.7435	0
	High	TIAIIAEGIPEALTr	6	1	1	P53396	R15(Arg10)	0	629782	0.876642	3	9.86202	0	3.011e-05	62.81	7.72311e-05	2	1577.91	0.69853	52.0688	0
	High	SGGmSNELNNIISr	1	1	1	P53396	M4(Oxidation); R14(Arg10)	0	547473	0.544944	1		0	0.006854	16.47	7.11325	2	1517.73	0.959902	34.9046	0
	High	FIcTTSAIQNR	2	1	1	P53396	C3(Carbamidomethyl)	0	522959				0	0.01171	14.77	8.78745	2	1310.65	0.615266	28.435	0
	High	AFDSGIIPmEFVNk	1	1	1	P53396	M9(Oxidation); K14(Lys8)	0	642439	0.0104903	1		0.001	0.02671	14.67	11.4538	2	1591.79	1.5201	45.4695	0
	High	AkPAmPQDSVPsPr	1	1	1	P53396	K2(Lys8); M5(Oxidation); S12(Phospho); R14(Arg10)	0	918389	1.13415	1		0.004	0.07392	23.79	1.26603	2	1594.74	1.16535	20.745	0
F8VQ14	T-complex protein 1 subunit beta OS=Homo sapiens GN=CCT2 PE=1 SV=1 - [F8VQ14_HUMAN]	212.89	12.02	4	3	3	15	974370	0.86009	9	14.1809	416	44.7846	6.53662
	A2	Sequence	# PSMs	# Proteins	# Protein Groups	Protein Group Accessions	Modifications	ΔCn	Area	Light/Heavy	Light/Heavy Count	Light/Heavy Variability [%]	q-Value	PEP	IonScore	Exp Value	Charge	MH+ [Da]	ΔM [ppm]	RT [min]	# Missed Cleavages
	High	GATQQILDEAER	4	4	1	F8VQ14		0	1.56771e+06	1.22887	3	3.3551	0	0.006219	51.69	0.00167886	2	1330.66	1.40336	33.0425	0
	High	EALLSSAVDHGSDEVK	2	4	1	F8VQ14		0	539088	0.81202	2	21.2949	0	2.896e-05	41.68	0.0266112	2	1656.81	3.35382	32.2503	0
	High	GATQQILDEAEr	2	4	1	F8VQ14	R12(Arg10)	0	1.33022e+06				0	0.002926	40.87	0.0212555	2	1340.67	1.23448	32.999	0
	High	VQDDEVGDGTTSVTVLAAELLr	3	4	1	F8VQ14	R22(Arg10)	0	476145	0.782008	3	6.83813	0	0.001993	37.1	0.107368	2	2298.18	2.85486	60.0235	0
	High	VQDDEVGDGTTSVTVLAAELLR	2	4	1	F8VQ14		0	447487				0	0.001676	33.57	0.245572	2	2288.16	0.29273	59.9996	0
	High	EALLSSAVDHGSDEVk	2	4	1	F8VQ14	K16(Lys8)	0	879252	0.821275	1		0	0.002674	28.74	0.496278	2	1664.82	0.454742	32.2566	0
P35908	Keratin, type II cytoskeletal 2 epidermal OS=Homo sapiens GN=KRT2 PE=1 SV=2 - [K22E_HUMAN]	200.878	11.11	1	3	4	14	3.32032e+06	100	13	0	639	65.3932	8.00146
	A2	Sequence	# PSMs	# Proteins	# Protein Groups	Protein Group Accessions	Modifications	ΔCn	Area	Light/Heavy	Light/Heavy Count	Light/Heavy Variability [%]	q-Value	PEP	IonScore	Exp Value	Charge	MH+ [Da]	ΔM [ppm]	RT [min]	# Missed Cleavages
	High	GFSSGSAVVSGGSR	3	1	1	P35908		0	3.26605e+06	100	3	0	0	0.004033	65.75	5.49706e-05	2	1254.61	0.856631	23.6341	0
	High	FLEQQNQVLQTK	4	2	2	P04264;P35908		0	1.97298e+06	100	3	0	0	0.001781	60.52	0.000242903	2	1475.79	0.499423	31.6273	0
	High	AAFGGSGGRGSSSGGGYSSGSSSYGSGGR	3	1	1	P35908		0	2.67875e+06	100	3	0	0	0.00659	34.61	0.193242	3	2501.07	1.0632	22.3691	1
	High	HGGGGGGFGGGGFGSR	4	1	1	P35908		0	4.01615e+06	100	4	0	0	0.005165	24.96	0.49389	3	1320.58	-0.432566	23.5397	0
Q99832-3	Isoform 3 of T-complex protein 1 subunit eta OS=Homo sapiens GN=CCT7 - [TCPH_HUMAN]	192.277	12.83	2	4	4	15	1.37558e+06	0.829869	7	13.5366	499	54.7695	7.6792
	A2	Sequence	# PSMs	# Proteins	# Protein Groups	Protein Group Accessions	Modifications	ΔCn	Area	Light/Heavy	Light/Heavy Count	Light/Heavy Variability [%]	q-Value	PEP	IonScore	Exp Value	Charge	MH+ [Da]	ΔM [ppm]	RT [min]	# Missed Cleavages
	High	LPIGDVATQYFADr	3	2	1	Q99832-3	R14(Arg10)	0	2.53045e+06	0.757769	1		0	0.0008503	60.76	0.000271901	2	1575.81	0.900676	46.7492	0
	High	LPIGDVATQYFADR	4	2	1	Q99832-3		0	1.27055e+06	0.600162	2	0.107701	0	0.001114	50.93	0.00260697	2	1565.8	0.418374	46.7054	0
	High	SQDAEVGDGTTSVTLLAAEFLK	2	2	1	Q99832-3		0	181727	0.833374	1		0	0.005571	33.31	0.276356	2	2252.12	-3.43306	60.1766	0
	High	ATISNDGATILk	3	2	1	Q99832-3	K12(Lys8)	0	1.27474e+06	0.831224	3	0.241929	0	0.005016	31.16	0.155225	2	1211.67	0.677519	30.1102	0
	High	ATISNDGATILK	2	2	1	Q99832-3		0	1.28198e+06				0.001	0.03969	18.89	2.596	2	1203.66	0.105805	30.1158	0
	High	QLcDNAGFDATNILNk	1	2	1	Q99832-3	C3(Carbamidomethyl); K16(Lys8)	0	314312				0.001	0.03575	11.26	30.963	2	1801.87	2.37576	41.608	0
B1AHC9	X-ray repair cross-complementing protein 6 OS=Homo sapiens GN=XRCC6 PE=1 SV=1 - [B1AHC9_HUMAN]	183.39	10.02	2	4	4	12	1.03552e+06	1.03113	7	25.6305	559	64.243	9.27588
	A2	Sequence	# PSMs	# Proteins	# Protein Groups	Protein Group Accessions	Modifications	ΔCn	Area	Light/Heavy	Light/Heavy Count	Light/Heavy Variability [%]	q-Value	PEP	IonScore	Exp Value	Charge	MH+ [Da]	ΔM [ppm]	RT [min]	# Missed Cleavages
	High	NIYVLQELDNPGAK	3	2	1	B1AHC9		0	1.06873e+06	1.22237	1		0	0.0001788	61.48	0.000209417	2	1573.82	1.44687	44.825	0
	High	NIYVLQELDNPGAk	4	2	1	B1AHC9	K14(Lys8)	0	1.03646e+06	1.0514	2	2.8864	0	0.0001256	59.41	0.000336953	2	1581.84	1.41498	44.9363	0
	High	NIPPYFVALVPQEEELDDQK	1	2	1	B1AHC9		0	534199	3.37187	1		0	0.005229	27.16	1.20222	2	2344.17	0.157359	54.5967	0
	High	ILELDQFk	1	2	1	B1AHC9	K8(Lys8)	0	889320	0.854559	1		0.001	0.03051	28.94	0.156555	2	1013.58	0.0818516	40.3888	0
	High	SDSFENPVLQQHFr	1	2	1	B1AHC9	R14(Arg10)	0	1.14852e+06	0.849208	1		0.004	0.0742	10.35	35.3483	3	1713.82	-0.00392899	37.8928	0
	High	ILELDQFK	2	2	1	B1AHC9		0	796195	0.92659	1		0.005	0.08415	28.1	0.207077	2	1005.56	0.363923	40.5358	0
P67809	Nuclease-sensitive element-binding protein 1 OS=Homo sapiens GN=YBX1 PE=1 SV=3 - [YBOX1_HUMAN]	182.397	37.35	2	5	5	24	1.40843e+07	1.04188	14	31.8336	324	35.9027	9.87646
	A2	Sequence	# PSMs	# Proteins	# Protein Groups	Protein Group Accessions	Modifications	ΔCn	Area	Light/Heavy	Light/Heavy Count	Light/Heavy Variability [%]	q-Value	PEP	IonScore	Exp Value	Charge	MH+ [Da]	ΔM [ppm]	RT [min]	# Missed Cleavages
	High	GAEAANVTGPGGVPVQGSk	3	2	1	P67809	K19(Lys8)	0	3.27534e+06	1.41628	2	8.88787	0	0.001189	58.76	0.000499386	2	1703.88	1.5505	26.3892	0
	High	RPQYSNPPVQGEVmEGADNQGAGEQGRPVR	3	2	1	P67809	M14(Oxidation)	0	2.90378e+06	1.18427	1		0	0.0001647	45.88	0.0278019	4	3239.52	-0.912174	28.6161	0
	High	NYQQNYQNSESGEkNEGSESAPEGQAQQr	2	2	1	P67809	K14(Lys8); R29(Arg10)	0	3.60745e+06	0.829448	2	11.9146	0	0.0001073	43.15	0.046604	3	3275.42	1.45868	21.4476	1
	High	NYQQNYQNsESGEKNEGSESAPEGQAQQR	3	2	1	P67809	S9(Phospho)	0	2.59489e+07	0.781816	3	7.19037	0	0.000288	37.12	0.136483	3	3337.37	1.20755	21.631	1
	High	GAEAANVTGPGGVPVQGSK	2	2	1	P67809		0	4.48523e+06	1.33548	1		0	0.0002074	34.71	0.128955	2	1695.87	1.00488	26.5163	0
	High	NYQQNYQNsESGEkNEGSESAPEGQAQQr	4	2	1	P67809	S9(Phospho); K14(Lys8); R29(Arg10)	0	22914382				0	0.006575	32.35	0.451945	3	3355.39	1.38086	21.5224	1
	High	NYQQNYQNSESGEKNEGSESAPEGQAQQR	1	2	1	P67809		0	2.89712e+06	0.869914	1		0	0.0002756	29.09	1.08538	3	3257.4	1.28155	21.1184	1
	High	rPQYSNPPVQGEVmEGADNQGAGEQGrPVr	3	2	1	P67809	R1(Arg10); M14(Oxidation); R27(Arg10); R30(Arg10)	0	2.56591e+06	1.12245	2	9.42083	0	0.01138	24.98	3.22818	4	3269.56	3.23226	28.2542	0
	High	EDGNEEDkENQGDETQGQQPPQr	2	2	1	P67809	K8(Lys8); R23(Arg10)	0	1.10181e+07	1.05888	2	4.04614	0	0.01166	19.01	7.76289	3	2646.13	0.915742	16.3108	1
	High	AADPPAENSsAPEAEQGGAE	1	2	1	P67809	S10(Phospho)	0	5.286e+06				0	0.001909	14.05	7.99497	2	1977.77	1.41018	21.8507	0
P40227-2	Isoform 2 of T-complex protein 1 subunit zeta OS=Homo sapiens GN=CCT6A - [TCPZ_HUMAN]	171.29	5.14	2	2	2	9	934138	1.02564	4	9.39142	486	53.2551	7.26904
	A2	Sequence	# PSMs	# Proteins	# Protein Groups	Protein Group Accessions	Modifications	ΔCn	Area	Light/Heavy	Light/Heavy Count	Light/Heavy Variability [%]	q-Value	PEP	IonScore	Exp Value	Charge	MH+ [Da]	ΔM [ppm]	RT [min]	# Missed Cleavages
	High	VLAQNSGFDLQETLVk	4	2	1	P40227-2	K16(Lys8)	0	1.07404e+06	1.05694	3	9.85305	0	0.0002692	57.19	0.000619174	2	1769.95	1.39059	43.9663	0
	High	VLAQNSGFDLQETLVK	4	2	1	P40227-2		0	1.21301e+06				0	0.0001106	42.88	0.017577	2	1761.94	1.69609	43.8522	0
	High	ALQFLEEVk	1	2	1	P40227-2	K9(Lys8)	0	655268	0.995272	1		0	0.01221	17.79	2.62819	2	1084.61	0.179242	41.8962	0
P08133	Annexin A6 OS=Homo sapiens GN=ANXA6 PE=1 SV=3 - [ANXA6_HUMAN]	162.913	11.74	2	5	5	10	842417	1.34002	9	48.553	673	75.8256	5.60498
	A2	Sequence	# PSMs	# Proteins	# Protein Groups	Protein Group Accessions	Modifications	ΔCn	Area	Light/Heavy	Light/Heavy Count	Light/Heavy Variability [%]	q-Value	PEP	IonScore	Exp Value	Charge	MH+ [Da]	ΔM [ppm]	RT [min]	# Missed Cleavages
	High	DAFVAIVQSVk	3	2	1	P08133	K11(Lys8)	0	1.01929e+06	0.982523	3	0.781225	0	0.001222	61.62	0.000108773	2	1184.68	-0.102222	45.1641	0
	High	DAFVAIVQSVK	1	2	1	P08133		0	878752				0	0.002946	44.1	0.0067616	2	1176.66	0.863779	45.1471	0
	High	ALIEILATr	1	2	1	P08133	R9(Arg10)	0	583553	0.983763	1		0	0.001626	43.65	0.00295375	2	1009.63	-0.354774	43.9973	0
	High	EDAQVAAEILEIADTPSGDK	2	2	1	P08133		0	389656	5.17859	2	738.476	0	0.0006389	40.73	0.045607	2	2072	0.882774	51.4765	0
	High	DLEADIIGDTSGHFQK	2	2	1	P08133		0	812819	1.84845	2	20.6128	0	0.00171	21.59	2.8167	2	1745.84	2.65856	44.7122	0
	High	GSIHDFPGFDPNQDAEALYTAmK	1	1	1	P08133	M22(Oxidation)	0	695144	4.42165	1		0	0.0007096	19.32	8.23269	3	2540.14	-1.08898	46.2775	0
Q00610-2	Isoform 2 of Clathrin heavy chain 1 OS=Homo sapiens GN=CLTC - [CLH1_HUMAN]	161.44	1.83	3	2	2	13	3.36152e+06	1.09843	8	17.2614	1639	187.771	5.69385
	A2	Sequence	# PSMs	# Proteins	# Protein Groups	Protein Group Accessions	Modifications	ΔCn	Area	Light/Heavy	Light/Heavy Count	Light/Heavy Variability [%]	q-Value	PEP	IonScore	Exp Value	Charge	MH+ [Da]	ΔM [ppm]	RT [min]	# Missed Cleavages
	High	IYIDSNNNPEr	2	3	1	Q00610-2	R11(Arg10)	0	1.65454e+06	1.25819	2	2.91189	0	0.005781	65.13	7.80606e-05	2	1344.64	1.22703	24.3642	0
	High	LASTLVHLGEYQAAVDGAR	5	3	1	Q00610-2		0	4.04656e+06	1.04603	3	11.5318	0	6.036e-06	44.99	0.0125642	2	1971.03	1.9642	41.3528	0
	High	LASTLVHLGEYQAAVDGAr	5	3	1	Q00610-2	R19(Arg10)	0	4.5285e+06	1.06742	3	21.5384	0	0.0001054	42.73	0.0216241	3	1981.04	0.392237	41.3216	0
	High	IYIDSNNNPER	1	3	1	Q00610-2		0	2.19453e+06				0	0.007355	16.75	4.98044	2	1334.63	1.02949	24.401	0
P31146	Coronin-1A OS=Homo sapiens GN=CORO1A PE=1 SV=4 - [COR1A_HUMAN]	154.358	14.75	1	6	6	16	2.46402e+06	1.1392	10	33.9217	461	50.9938	6.68311
	A2	Sequence	# PSMs	# Proteins	# Protein Groups	Protein Group Accessions	Modifications	ΔCn	Area	Light/Heavy	Light/Heavy Count	Light/Heavy Variability [%]	q-Value	PEP	IonScore	Exp Value	Charge	MH+ [Da]	ΔM [ppm]	RT [min]	# Missed Cleavages
	High	DAGPLLISLk	3	1	1	P31146	K10(Lys8)	0	1.91505e+06	1.43284	3	0.330327	0	0.00899	49.82	0.000674379	2	1034.63	-0.154499	43.7337	0
	High	VSQTTWDSGFcAVNPk	3	1	1	P31146	C11(Carbamidomethyl); K16(Lys8)	0	2.00291e+06	1.08965	1		0	0.0001527	42.61	0.0236472	2	1804.84	0.0642899	38.4105	0
	High	VSQTTWDSGFcAVNPK	3	1	1	P31146	C11(Carbamidomethyl)	0	2.40161e+06	1.26997	2	21.0371	0	0.003081	30.73	0.357553	2	1796.83	1.5808	38.1486	0
	High	AAPEASGTPSSDAVSR	1	1	1	P31146		0	1.78185e+06				0	0.0009828	24.39	1.03443	2	1502.71	0.945642	19.8679	0
	High	ILTTGFSr	2	1	1	P31146	R8(Arg10)	0	3.07539e+06	0.911856	2	0.13896	0.001	0.04295	33.79	0.0458151	2	904.513	0.0349095	28.9219	0
	High	LQATVQELQk	1	1	1	P31146	K10(Lys8)	0	597000	0.98757	1		0.004	0.07081	23.66	0.684107	2	1165.67	0.596823	26.6961	0
	High	ILTTGFSR	2	1	1	P31146		0	2.83752e+06				0.005	0.0926	19.92	0.85307	2	894.504	-0.136696	28.9648	0
	High	QVALWDTK	1	1	1	P31146		0	1.34226e+06	1.17587	1		0.009	0.1155	15.12	4.20349	2	960.515	-0.202213	33.3165	0
Q9H1E3	Nuclear ubiquitous casein and cyclin-dependent kinase substrate 1 OS=Homo sapiens GN=NUCKS1 PE=1 SV=1 - [NUCKS_HUMAN]	151.228	8.23	1	2	2	12	1.85778e+06	0.920262	6	17.3022	243	27.28	5.08447
	A2	Sequence	# PSMs	# Proteins	# Protein Groups	Protein Group Accessions	Modifications	ΔCn	Area	Light/Heavy	Light/Heavy Count	Light/Heavy Variability [%]	q-Value	PEP	IonScore	Exp Value	Charge	MH+ [Da]	ΔM [ppm]	RT [min]	# Missed Cleavages
	High	VVDYSQFQEsDDADEDYGR	4	1	1	Q9H1E3	S10(Phospho)	0	2.19628e+06	0.904856	1		0	0.0004006	56.55	0.000511557	2	2317.89	6.44594	35.6015	0
	High	VVDYSQFQEsDDADEDYGr	5	1	1	Q9H1E3	S10(Phospho); R19(Arg10)	0	2.00233e+06	1.01321	2	11.8028	0	0.0002966	45.47	0.00577233	2	2327.89	1.08322	35.4955	0
	High	kVVDYSQFQEsDDADEDYGr	3	1	1	Q9H1E3	K1(Lys8); S11(Phospho); R20(Arg10)	0	1.51928e+06	0.870028	3	45.3331	0	0.001734	26.75	0.819611	3	2464	0.754738	33.5707	1
P07195	L-lactate dehydrogenase B chain OS=Homo sapiens GN=LDHB PE=1 SV=2 - [LDHB_HUMAN]	149.449	17.07	1	4	5	17	2.46197e+06	1.25939	11	55.9196	334	36.6151	6.04932
	A2	Sequence	# PSMs	# Proteins	# Protein Groups	Protein Group Accessions	Modifications	ΔCn	Area	Light/Heavy	Light/Heavy Count	Light/Heavy Variability [%]	q-Value	PEP	IonScore	Exp Value	Charge	MH+ [Da]	ΔM [ppm]	RT [min]	# Missed Cleavages
	High	VIGSGcNLDSAR	3	3	2	P00338;P07195	C6(Carbamidomethyl)	0	3.39142e+06	0.839629	2	5.28043	0	0.007511	43.71	0.00865667	2	1248.6	0.367	23.8051	0
	High	VIGSGcNLDSAr	3	3	2	P00338;P07195	C6(Carbamidomethyl); R12(Arg10)	0	3.82841e+06	0.885855	1		0	0.003636	42.53	0.0120602	2	1258.61	0.486321	23.7702	0
	High	LIAPVAEEEATVPNNK	4	1	1	P07195		0	2.07126e+06	1.25939	3	17.1042	0	0.002538	36.55	0.0745924	2	1694.9	0.799556	34.2465	0
	High	LIAPVAEEEATVPNNk	2	1	1	P07195	K16(Lys8)	0	1.81515e+06				0	0.00149	17.4	5.81212	2	1702.91	1.34645	34.3104	0
	High	mVVESAYEVIk	3	1	1	P07195	M1(Oxidation); K11(Lys8)	0	1.02157e+06	1.88104	3	2.05489	0.001	0.04656	34.06	0.0882862	2	1291.67	0.704812	34.6076	0
	High	IVVVTAGVR	1	1	1	P07195		0	1.02254e+06	1.32001	1		0.002	0.05859	19.48	0.494276	2	913.583	0.281547	28.7964	0
	High	GLTSVINQK	1	1	1	P07195		0	1.48624e+06	1.04307	1		0.003	0.06733	34.6	0.0370835	2	959.552	0.178581	28.0233	0
P60842	Eukaryotic initiation factor 4A-I OS=Homo sapiens GN=EIF4A1 PE=1 SV=1 - [IF4A1_HUMAN]	146.883	18.72	1	5	5	15	1.66755e+06	0.771482	12	19.3171	406	46.1246	5.47803
	A2	Sequence	# PSMs	# Proteins	# Protein Groups	Protein Group Accessions	Modifications	ΔCn	Area	Light/Heavy	Light/Heavy Count	Light/Heavy Variability [%]	q-Value	PEP	IonScore	Exp Value	Charge	MH+ [Da]	ΔM [ppm]	RT [min]	# Missed Cleavages
	High	GYDVIAQAQSGTGk	3	1	1	P60842	K14(Lys8)	0	1.76559e+06	0.551914	3	2.0993	0	8.225e-05	69.98	2.83703e-05	2	1402.71	0.317797	29.9156	0
	High	VLITTDLLAr	1	1	1	P60842	R10(Arg10)	0	1.73156e+06	0.886032	1		0	0.0006278	49.74	0.000830777	2	1124.69	0.62586	43.6063	0
	High	VVmALGDYmGAScHAcIGGTNVr	3	1	1	P60842	M3(Oxidation); M9(Oxidation); C13(Carbamidomethyl); C16(Carbamidomethyl); R23(Arg10)	0	1.50551e+06	0.682037	3	1.74115	0	0.007205	29.33	0.774412	3	2481.1	0.939835	34.3403	0
	High	GIYAYGFEKPSAIQQR	3	1	1	P60842		0	1.10618e+06	0.843701	1		0	0.002835	24.81	1.34972	3	1827.94	0.336979	36.2878	0
	High	GIYAYGFEkPSAIQQr	3	1	1	P60842	K9(Lys8); R16(Arg10)	0	1.19426e+06	0.823341	3	11.0261	0	0.009516	24.07	1.53367	2	1845.97	2.71776	36.3674	0
	High	VVmALGDYmGAScHAcIGGTNVR	1	1	1	P60842	M3(Oxidation); M9(Oxidation); C13(Carbamidomethyl); C16(Carbamidomethyl)	0	962101				0	0.004335	13.41	28.8763	3	2471.1	1.57297	34.2571	0
	High	mFVLDEADEmLSr	1	1	1	P60842	M1(Oxidation); M10(Oxidation); R13(Arg10)	0	772122	0.883725	1		0.001	0.04542	13.69	11.0183	2	1597.71	1.64265	39.8917	0
P61978-3	Isoform 3 of Heterogeneous nuclear ribonucleoprotein K OS=Homo sapiens GN=HNRNPK - [HNRPK_HUMAN]	134.81	16.14	3	4	4	20	1.1428e+06	1.12917	11	17.8754	440	48.5322	5.5415
	A2	Sequence	# PSMs	# Proteins	# Protein Groups	Protein Group Accessions	Modifications	ΔCn	Area	Light/Heavy	Light/Heavy Count	Light/Heavy Variability [%]	q-Value	PEP	IonScore	Exp Value	Charge	MH+ [Da]	ΔM [ppm]	RT [min]	# Missed Cleavages
	High	IILDLISESPIK	3	3	1	P61978-3		0	1.20445e+06	1.12917	3	2.24535	0	0.005294	51.71	0.000593585	2	1340.8	0.74711	52.1917	0
	High	TDYNASVSVPDSSGPER	2	3	1	P61978-3		0	479951	1.22747	2	30.8057	0	0.003671	33.81	0.144508	2	1780.8	0.769871	29.4573	0
	High	GSYGDLGGPIITTQVTIPK	3	3	1	P61978-3		0	1.35078e+06	1.40197	2	5.2275	0	0.0003491	30.78	0.265011	2	1917.04	1.1635	46.3333	0
	High	GSYGDLGGPIITTQVTIPk	4	3	1	P61978-3	K19(Lys8)	0	998045	1.19039	1		0	0.000131	30.5	0.255566	2	1925.05	0.884837	46.2574	0
	High	IITITGTQDQIQNAQYLLQNSVk	2	3	1	P61978-3	K23(Lys8)	0	733939	0.593966	2	44.0886	0	0.003955	28.39	0.447743	3	2597.4	0.125465	53.6501	0
	High	TDYNASVSVPDSSGPEr	3	3	1	P61978-3	R17(Arg10)	0	873158	1.05784	1		0	0.006462	22.64	2.00568	2	1790.81	2.07845	29.4874	0
	High	IITITGTQDQIQNAQYLLQNSVK	3	3	1	P61978-3		0	505678				0	0.01692	15.15	10.3348	3	2589.39	0.989419	53.7037	0
P00338	L-lactate dehydrogenase A chain OS=Homo sapiens GN=LDHA PE=1 SV=2 - [LDHA_HUMAN]	132.08	12.65	2	3	4	11	2.48023e+06	0.894558	8	6.72931	332	36.6654	8.26514
	A2	Sequence	# PSMs	# Proteins	# Protein Groups	Protein Group Accessions	Modifications	ΔCn	Area	Light/Heavy	Light/Heavy Count	Light/Heavy Variability [%]	q-Value	PEP	IonScore	Exp Value	Charge	MH+ [Da]	ΔM [ppm]	RT [min]	# Missed Cleavages
	High	VIGSGcNLDSAR	3	3	2	P00338;P07195	C6(Carbamidomethyl)	0	3.39142e+06	0.839629	2	5.28043	0	0.007511	43.71	0.00865667	2	1248.6	0.367	23.8051	0
	High	VIGSGcNLDSAr	3	3	2	P00338;P07195	C6(Carbamidomethyl); R12(Arg10)	0	3.82841e+06	0.885855	1		0	0.003636	42.53	0.0120602	2	1258.61	0.486321	23.7702	0
	High	VTLTSEEEAr	2	2	1	P00338	R10(Arg10)	0	2.2248e+06	0.930383	2	3.50442	0	0.008658	37.85	0.0336895	2	1144.57	0.247187	22.3486	0
	High	QVVESAYEVIk	2	2	1	P00338	K11(Lys8)	0	1.38749e+06	0.863711	2	6.65942	0	0.02189	30.67	0.179764	2	1272.69	0.545774	34.8729	0
	High	LVIITAGAR	1	2	1	P00338		0	1.21464e+06	0.972492	1		0.001	0.0317	18.65	0.59837	2	913.583	0.214739	31.7846	0
P13010	X-ray repair cross-complementing protein 5 OS=Homo sapiens GN=XRCC5 PE=1 SV=3 - [XRCC5_HUMAN]	123.243	3.01	1	2	2	6	908050	0.998673	4	24.5397	732	82.6523	5.80811
	A2	Sequence	# PSMs	# Proteins	# Protein Groups	Protein Group Accessions	Modifications	ΔCn	Area	Light/Heavy	Light/Heavy Count	Light/Heavy Variability [%]	q-Value	PEP	IonScore	Exp Value	Charge	MH+ [Da]	ΔM [ppm]	RT [min]	# Missed Cleavages
	High	YGSDIVPFSk	2	1	1	P13010	K10(Lys8)	0	1.18868e+06	0.951214	2	24.5397	0	0.003058	62.87	9.28517e-05	2	1120.58	-0.459556	35.9713	0
	High	YGSDIVPFSK	3	1	1	P13010		0	1.02831e+06	0.890702	1		0	0.01103	46.71	0.00371683	2	1112.56	0.230368	35.9657	0
	High	TDTLEDLFPTTK	1	1	1	P13010		0	627416	1.55171	1		0.001	0.04346	19.42	3.39949	2	1380.69	0.189394	46.1006	0
J3QLL0	Importin subunit alpha-1 (Fragment) OS=Homo sapiens GN=KPNA2 PE=1 SV=1 - [J3QLL0_HUMAN]	118.759	23.88	3	2	2	9	2.16382e+06	0.684701	4	7.84828	134	15.2249	10.2134
	A2	Sequence	# PSMs	# Proteins	# Protein Groups	Protein Group Accessions	Modifications	ΔCn	Area	Light/Heavy	Light/Heavy Count	Light/Heavy Variability [%]	q-Value	PEP	IonScore	Exp Value	Charge	MH+ [Da]	ΔM [ppm]	RT [min]	# Missed Cleavages
	High	NVSSFPDDATsPLQENr	4	3	1	J3QLL0	S11(Phospho); R17(Arg10)	0	3.89154e+06	0.721865	2	7.30447	0	4.359e-05	80.33	3.2249e-06	2	1966.85	2.36004	35.8472	0
	High	NVSSFPDDATsPLQENR	4	3	1	J3QLL0	S11(Phospho)	0	2.91385e+06	0.682205	1		0	0.001168	39.57	0.0355237	2	1956.83	0.297288	35.8931	0
	High	NNQGTVNWSVDDIVk	1	3	1	J3QLL0	K15(Lys8)	0	436098	0.496907	1		0	0.003592	21.08	2.98831	2	1696.84	-0.0294701	42.7335	0
P17987	T-complex protein 1 subunit alpha OS=Homo sapiens GN=TCP1 PE=1 SV=1 - [TCPA_HUMAN]	118.66	16.55	1	7	7	20	941931	0.928216	11	41.3524	556	60.3056	6.11279
	A2	Sequence	# PSMs	# Proteins	# Protein Groups	Protein Group Accessions	Modifications	ΔCn	Area	Light/Heavy	Light/Heavy Count	Light/Heavy Variability [%]	q-Value	PEP	IonScore	Exp Value	Charge	MH+ [Da]	ΔM [ppm]	RT [min]	# Missed Cleavages
	High	SLLVIPNTLAVNAAQDSTDLVAk	3	1	1	P17987	K23(Lys8)	0	562995	1.08315	3	27.0409	0	0.000112	39.81	0.0206437	2	2361.31	0.285078	55.5299	0
	High	SLLVIPNTLAVNAAQDSTDLVAK	4	1	1	P17987		0	525599				0	0.0006304	34.99	0.0724563	2	2353.3	0.302555	55.5625	0
	High	mLVDDIGDVTITNDGATILK	4	1	1	P17987	M1(Oxidation)	0	414244	0.499751	3	8.43256	0	0.01124	28.73	0.712641	2	2120.07	-4.53694	49.0332	0
	High	DDKHGSYEDAVHSGALND	1	1	1	P17987		0	595912	1.07912	1		0	0.01308	18.84	4.10464	2	1929.82	1.93973	26.1253	1
	High	EQLAIAEFAr	1	1	1	P17987	R10(Arg10)	0	1065921	0.710009	1		0.001	0.03715	23.53	0.866368	2	1157.62	0.328255	40.5612	0
	High	EQLAIAEFAR	3	1	1	P17987		0	1.30349e+06	0.967189	2	6.10363	0.002	0.0609	27.9	0.305792	2	1147.61	-0.547529	40.279	0
	High	YPVNSVNILk	1	1	1	P17987	K10(Lys8)	0	512828				0.002	0.05686	13.46	5.96881	2	1154.67	0.291915	36.4683	0
	High	QAGVFEPTIVK	1	1	1	P17987		0	775518	95.4707	1		0.005	0.07926	30.84	0.146779	2	1188.66	0.136191	35.7138	0
	High	YPVNSVNILK	1	1	1	P17987		0	0				0.005	0.0916	12.32	8.97084	2	1146.65	-0.0980011	36.623	0
	High	HGSYEDAVHsGALND	1	1	1	P17987	S10(Phospho)	0	746788				0.006	0.09895	18.47	1.76938	2	1651.64	0.297471	26.8095	0
E9PCY7	Heterogeneous nuclear ribonucleoprotein H OS=Homo sapiens GN=HNRNPH1 PE=1 SV=1 - [E9PCY7_HUMAN]	116.367	11.66	4	3	3	11	1.07747e+06	1.04275	7	31.8905	429	47.0574	6.34131
	A2	Sequence	# PSMs	# Proteins	# Protein Groups	Protein Group Accessions	Modifications	ΔCn	Area	Light/Heavy	Light/Heavy Count	Light/Heavy Variability [%]	q-Value	PEP	IonScore	Exp Value	Charge	MH+ [Da]	ΔM [ppm]	RT [min]	# Missed Cleavages
	High	STGEAFVQFASQEIAEK	2	4	1	E9PCY7		0	804693	0.88352	2	6.56086	0	0.001502	44.49	0.0161866	2	1841.89	1.77739	48.8453	0
	High	STGEAFVQFASQEIAEk	5	4	1	E9PCY7	K17(Lys8)	0	951945	0.808136	1		0	0.0002657	41.13	0.0367875	2	1849.91	2.40856	48.9924	0
	High	ATENDIYNFFSPLNPVR	2	4	1	E9PCY7		0	144162	3.54478	2	187.618	0	0.002613	31.87	0.324577	2	1996.97	-0.990732	56.7614	0
	High	HTGPNsPDTANDGFVr	2	3	1	E9PCY7	S6(Phospho); R16(Arg10)	0	2.1363e+06	1.12992	2	11.9448	0.005	0.07922	12.83	12.665	2	1774.75	1.67991	25.1639	0
H0YH81	ATP synthase subunit beta (Fragment) OS=Homo sapiens GN=ATP5B PE=1 SV=1 - [H0YH81_HUMAN]	115.017	14.92	2	4	4	13	800908	1.04953	8	22.745	362	38.2249	5.5542
	A2	Sequence	# PSMs	# Proteins	# Protein Groups	Protein Group Accessions	Modifications	ΔCn	Area	Light/Heavy	Light/Heavy Count	Light/Heavy Variability [%]	q-Value	PEP	IonScore	Exp Value	Charge	MH+ [Da]	ΔM [ppm]	RT [min]	# Missed Cleavages
	High	FTQAGSEVSALLGR	4	2	1	H0YH81		0	795509	0.965574	3	6.75433	0	0.005141	44.95	0.00875538	2	1435.76	2.06463	43.1689	0
	High	AIAELGIYPAVDPLDSTSR	3	2	1	H0YH81		0	1.0817e+06	1.16398	3	9.75426	0	0.002464	35.87	0.106725	2	1988.04	4.37246	50.2597	0
	High	FTQAGSEVSALLGr	2	2	1	H0YH81	R14(Arg10)	0	757325				0	0.01691	33.48	0.124549	2	1445.77	2.07232	43.1423	0
	High	AIAELGIYPAVDPLDSTSr	2	2	1	H0YH81	R19(Arg10)	0	970490				0	0.007272	26	1.02623	2	1998.04	0.456401	50.3449	0
	High	VVDLLAPYAk	1	2	1	H0YH81	K10(Lys8)	0	525518	0.859741	1		0.002	0.05949	13.64	5.07987	2	1096.65	-0.0481279	41.371	0
	High	IGLFGGAGVGk	1	2	1	H0YH81	K11(Lys8)	0	427389	1.41295	1		0.005	0.08175	18.8	1.28266	2	983.576	-0.555119	37.599	0
F8WBS8	26S proteasome non-ATPase regulatory subunit 2 OS=Homo sapiens GN=PSMD2 PE=1 SV=1 - [F8WBS8_HUMAN]	108.287	42.37	3	2	2	14	1.01056e+07	1.66202	9	5.75892	59	6.57933	9.40771
	A2	Sequence	# PSMs	# Proteins	# Protein Groups	Protein Group Accessions	Modifications	ΔCn	Area	Light/Heavy	Light/Heavy Count	Light/Heavy Variability [%]	q-Value	PEP	IonScore	Exp Value	Charge	MH+ [Da]	ΔM [ppm]	RT [min]	# Missed Cleavages
	High	APVQPQQsPAAAPGGTDEKPSGK	6	3	1	F8WBS8	S8(Phospho)	0	7.7744e+06	1.8147	4	5.54259	0	0.0007613	41.64	0.0430384	2	2298.08	1.34504	20.7978	0
	High	DKAPVQPQQsPAAAPGGTDEKPSGK	3	3	1	F8WBS8	S10(Phospho)	0	1.24368e+07	1.65851	3	0.313002	0	0.002345	33.11	0.386744	3	2541.2	1.03003	20.6337	1
	High	APVQPQQsPAAAPGGTDEkPSGk	3	3	1	F8WBS8	S8(Phospho); K19(Lys8); K23(Lys8)	0	4.76722e+06	1.63825	2	0.67522	0	0.00042	29.52	0.718366	3	2314.11	0.689709	20.7104	0
	High	DkAPVQPQQsPAAAPGGTDEkPSGk	2	3	1	F8WBS8	K2(Lys8); S10(Phospho); K21(Lys8); K25(Lys8)	0	6.64689e+06				0	0.003442	26.22	1.82262	3	2565.24	1.47461	20.283	1
P49736	DNA replication licensing factor MCM2 OS=Homo sapiens GN=MCM2 PE=1 SV=4 - [MCM2_HUMAN]	107.68	4.31	1	3	3	15	4.94718e+06	1.04891	8	4.18689	904	101.832	5.51611
	A2	Sequence	# PSMs	# Proteins	# Protein Groups	Protein Group Accessions	Modifications	ΔCn	Area	Light/Heavy	Light/Heavy Count	Light/Heavy Variability [%]	q-Value	PEP	IonScore	Exp Value	Charge	MH+ [Da]	ΔM [ppm]	RT [min]	# Missed Cleavages
	High	GLLYDsDEEDEErPAr	7	1	1	P49736	S6(Phospho); R13(Arg10); R16(Arg10)	0	3.39229e+06	1.03476	3	0.801018	0	0.004175	41.91	0.0196826	2	1993.83	1.39651	32.4684	0
	High	GLLYDsDEEDEERPAR	5	1	1	P49736	S6(Phospho)	0	3.5453e+06	1.00408	2	12.074	0	0.001595	37.23	0.0557201	3	1973.81	0.62952	32.5008	0
	High	GNDPLTSsPGr	1	1	1	P49736	S8(Phospho); R11(Arg10)	0	8.54014e+06	1.24483	1		0.001	0.04319	19.36	1.3859	2	1190.51	0.518333	22.3405	0
	High	GNDPLTSsPGR	1	1	1	P49736	S8(Phospho)	0	1.07705e+07	1.10635	1		0.002	0.05349	21.22	0.788694	2	1180.5	-0.124628	22.5134	0
	High	VAVGELTDEDVK	1	1	1	P49736		0	525748	1.05274	1		0.003	0.06457	20.15	2.23931	2	1274.65	1.24281	31.6988	0
F8VV57	Keratin, type II cytoskeletal 5 (Fragment) OS=Homo sapiens GN=KRT5 PE=1 SV=1 - [F8VV57_HUMAN]	102.5	18.94	2	2	2	5	2.82336e+06	100	5	0	132	12.1498	12.0005
	A2	Sequence	# PSMs	# Proteins	# Protein Groups	Protein Group Accessions	Modifications	ΔCn	Area	Light/Heavy	Light/Heavy Count	Light/Heavy Variability [%]	q-Value	PEP	IonScore	Exp Value	Charge	MH+ [Da]	ΔM [ppm]	RT [min]	# Missed Cleavages
	High	ISISTSGGSFR	3	2	1	F8VV57		0	3.8316e+06	100	3	0	0	0.002388	53.75	0.000739445	2	1111.57	-0.324911	31.4342	0
	High	SFSTASAITPSVSR	2	2	1	F8VV57		0	1.81513e+06	100	2	0	0.001	0.02684	27.61	0.498295	2	1410.72	0.827264	32.7126	0
B4DLW8	Probable ATP-dependent RNA helicase DDX5 OS=Homo sapiens GN=DDX5 PE=1 SV=1 - [B4DLW8_HUMAN]	98.4977	3.74	3	2	2	7	1.03932e+06	0.830844	4	8.73128	535	60.5254	9.0708
	A2	Sequence	# PSMs	# Proteins	# Protein Groups	Protein Group Accessions	Modifications	ΔCn	Area	Light/Heavy	Light/Heavy Count	Light/Heavy Variability [%]	q-Value	PEP	IonScore	Exp Value	Charge	MH+ [Da]	ΔM [ppm]	RT [min]	# Missed Cleavages
	High	APILIATDVASr	3	3	1	B4DLW8	R12(Arg10)	0	1.3314e+06	0.881145	2	3.56634	0	0.00199	50.96	0.00106142	2	1236.72	1.20486	37.1419	0
	High	APILIATDVASR	3	3	1	B4DLW8		0	1.31837e+06	0.802482	1		0	0.01537	45.63	0.00355311	2	1226.71	0.0941685	37.2687	0
	High	LLQLVEDr	1	3	1	B4DLW8	R8(Arg10)	0	747241	0.340042	1		0.005	0.08434	26.67	0.248969	2	995.575	-1.36378	34.7382	0
P31948-3	Isoform 3 of Stress-induced-phosphoprotein 1 OS=Homo sapiens GN=STIP1 - [STIP1_HUMAN]	91.41	8.09	3	3	3	7	1.26558e+06	1.29365	4	9.80294	519	59.74	6.80029
	A2	Sequence	# PSMs	# Proteins	# Protein Groups	Protein Group Accessions	Modifications	ΔCn	Area	Light/Heavy	Light/Heavy Count	Light/Heavy Variability [%]	q-Value	PEP	IonScore	Exp Value	Charge	MH+ [Da]	ΔM [ppm]	RT [min]	# Missed Cleavages
	High	LAYINPDLALEEK	2	3	1	P31948-3		0	1.93251e+06	1.34478	1		0	0.004438	46.89	0.00550084	2	1488.8	2.1183	43.1731	0
	High	LmDVGLIAIr	1	3	1	P31948-3	M2(Oxidation); R10(Arg10)	0	598655	1.03699	1		0	0.002311	38.06	0.0229783	2	1126.65	1.40349	41.5148	0
	High	LAYINPDLALEEk	3	3	1	P31948-3	K13(Lys8)	0	1.43704e+06	1.32932	2	9.80294	0	0.001166	35.91	0.0662278	2	1496.81	0.939259	43.1789	0
	High	ALSVGNIDDALQcYSEAIK	1	3	1	P31948-3	C13(Carbamidomethyl)	0	0				0	0.003106	24.61	1.86531	2	2067.01	0.241042	54.4886	0
P06748-3	Isoform 3 of Nucleophosmin OS=Homo sapiens GN=NPM1 - [NPM_HUMAN]	87.77	16.99	3	2	2	8	3.3219e+06	0.911578	5	2.70736	259	28.3827	4.71631
	A2	Sequence	# PSMs	# Proteins	# Protein Groups	Protein Group Accessions	Modifications	ΔCn	Area	Light/Heavy	Light/Heavy Count	Light/Heavy Variability [%]	q-Value	PEP	IonScore	Exp Value	Charge	MH+ [Da]	ΔM [ppm]	RT [min]	# Missed Cleavages
	High	cGSGPVHISGQHLVAVEEDAEsEDEEEEDVk	3	3	1	P06748-3	C1(Carbamidomethyl); S22(Phospho); K31(Lys8)	0	5.96173e+06	0.928374	3	2.70736	0	0.0002021	56.41	0.00206355	3	3468.46	2.36201	37.6602	0
	High	cGSGPVHISGQHLVAVEEDAEsEDEEEEDVK	2	3	1	P06748-3	C1(Carbamidomethyl); S22(Phospho)	0	5.68497e+06				0	1.987e-05	44.97	0.0261884	3	3460.44	0.0504985	37.6692	0
	High	VDNDENEHQLSLr	2	3	1	P06748-3	R13(Arg10)	0	682073	0.776198	1		0.002	0.04957	19.82	3.22806	2	1578.74	1.19691	23.7143	0
	High	VDNDENEHQLSLR	1	3	1	P06748-3		0	559482	0.899312	1		0.002	0.05651	13.88	12.0814	2	1568.73	1.33991	24.097	0
H0Y9Z8	Condensin complex subunit 3 (Fragment) OS=Homo sapiens GN=NCAPG PE=1 SV=1 - [H0Y9Z8_HUMAN]	86.92	10.04	2	2	2	12	2.88301e+06	0.853933	7	10.5255	269	30.2552	5.10986
	A2	Sequence	# PSMs	# Proteins	# Protein Groups	Protein Group Accessions	Modifications	ΔCn	Area	Light/Heavy	Light/Heavy Count	Light/Heavy Variability [%]	q-Value	PEP	IonScore	Exp Value	Charge	MH+ [Da]	ΔM [ppm]	RT [min]	# Missed Cleavages
	High	TLHcEGTEINsDDEQESk	6	2	1	H0Y9Z8	C4(Carbamidomethyl); S11(Phospho); K18(Lys8)	0	3.64338e+06	0.831503	4	4.10153	0	0.004896	37.98	0.0399087	2	2179.86	1.10545	21.887	0
	High	TLHcEGTEINsDDEQESK	4	2	1	H0Y9Z8	C4(Carbamidomethyl); S11(Phospho)	0	3.0291e+06	0.752966	1		0	0.0104	29.94	0.245772	2	2171.85	1.35223	21.8933	0
	High	TLHcEGTEINsDDEQESKEVEETATAK	2	2	1	H0Y9Z8	C4(Carbamidomethyl); S11(Phospho)	0	2.12264e+06	1.01388	2	3.54802	0	0.002721	18.49	10.2546	3	3130.31	0.961523	32.7767	1
P23526-2	Isoform 2 of Adenosylhomocysteinase OS=Homo sapiens GN=AHCY - [SAHH_HUMAN]	85.59	5.94	2	2	2	8	576598	0.865167	6	14.5201	404	44.6296	6.46826
	A2	Sequence	# PSMs	# Proteins	# Protein Groups	Protein Group Accessions	Modifications	ΔCn	Area	Light/Heavy	Light/Heavy Count	Light/Heavy Variability [%]	q-Value	PEP	IonScore	Exp Value	Charge	MH+ [Da]	ΔM [ppm]	RT [min]	# Missed Cleavages
	High	VPAINVNDSVTk	3	2	1	P23526-2	K12(Lys8)	0	674632	0.913083	2	1.28037	0	0.006038	42.2	0.0120783	2	1264.7	1.27673	30.2892	0
	High	VAVVAGYGDVGk	3	2	1	P23526-2	K12(Lys8)	0	478563	0.753405	3	13.8617	0	0.01318	32.79	0.0908169	2	1142.63	0.921149	29.4935	0
	High	VPAINVNDSVTK	2	2	1	P23526-2		0	666239	0.987559	1		0	0.002919	32.73	0.119067	2	1256.68	-0.0441313	30.4356	0
O43175	D-3-phosphoglycerate dehydrogenase OS=Homo sapiens GN=PHGDH PE=1 SV=4 - [SERA_HUMAN]	82.9	7.13	1	3	3	12	907736	2.02102	8	28.872	533	56.6144	6.7124
	A2	Sequence	# PSMs	# Proteins	# Protein Groups	Protein Group Accessions	Modifications	ΔCn	Area	Light/Heavy	Light/Heavy Count	Light/Heavy Variability [%]	q-Value	PEP	IonScore	Exp Value	Charge	MH+ [Da]	ΔM [ppm]	RT [min]	# Missed Cleavages
	High	AGTGVDNVDLEAATR	3	1	1	O43175		0	863447	1.46954	2	1.54471	0	0.0006829	48.72	0.00398935	2	1488.73	0.798558	32.0428	0
	High	AGTGVDNVDLEAATr	3	1	1	O43175	R15(Arg10)	0	486165	1.9787	1		0	0.008638	31.23	0.225027	2	1498.74	2.03616	32.1055	0
	High	ILQDGGLQVVEk	1	1	1	O43175	K12(Lys8)	0	322376	2.50007	1		0	0.006032	28.3	0.226304	2	1306.75	1.1706	33.9472	0
	High	ILQDGGLQVVEK	3	1	1	O43175		0	899093	2.22261	2	10.9915	0	0.01294	26.5	0.395694	2	1298.73	0.831768	33.8154	0
	High	VTADVINAAEK	2	1	1	O43175		0	960669	2.41941	2	45.5592	0.003	0.06582	30.76	0.170872	2	1130.61	0.351245	26.8339	0
E9PK09	Bcl-2-associated transcription factor 1 (Fragment) OS=Homo sapiens GN=BCLAF1 PE=1 SV=4 - [E9PK09_HUMAN]	80.1008	4.28	7	2	2	6	3.6543e+06	0.937975	4	27.3553	725	83.0857	10.1401
	A2	Sequence	# PSMs	# Proteins	# Protein Groups	Protein Group Accessions	Modifications	ΔCn	Area	Light/Heavy	Light/Heavy Count	Light/Heavy Variability [%]	q-Value	PEP	IonScore	Exp Value	Charge	MH+ [Da]	ΔM [ppm]	RT [min]	# Missed Cleavages
	High	FNDsEGDDTEETEDYR	2	7	1	E9PK09	S4(Phospho)	0	1.30422e+06	0.759435	2	5.25876	0	9.663e-05	57.16	0.000154713	2	2001.69	0.994232	27.8012	0
	High	FNDsEGDDTEETEDYr	2	7	1	E9PK09	S4(Phospho); R16(Arg10)	0	1.65755e+06				0	0.0001495	48.55	0.00117714	2	2011.7	0.21624	27.7502	0
	High	YsPSQNsPIHHIPSR	1	7	1	E9PK09	S2(Phospho); S7(Phospho)	0	5.65105e+06	1.13048	1		0	0.009824	14.68	9.61143	3	1879.79	0.329592	27.8591	0
	High	YsPSQNsPIHHIPSr	1	7	1	E9PK09	S2(Phospho); S7(Phospho); R15(Arg10)	0	1.95335e+06	1.11814	1		0.001	0.03577	19.7	3.26063	2	1889.8	2.09582	27.8859	0
B7ZKW8	CapZ-interacting protein OS=Homo sapiens GN=RCSD1 PE=1 SV=1 - [B7ZKW8_HUMAN]	77.6386	15.8	2	4	4	16	2.56771e+06	1.21865	10	9.10199	386	41.2363	5.26221
	A2	Sequence	# PSMs	# Proteins	# Protein Groups	Protein Group Accessions	Modifications	ΔCn	Area	Light/Heavy	Light/Heavy Count	Light/Heavy Variability [%]	q-Value	PEP	IonScore	Exp Value	Charge	MH+ [Da]	ΔM [ppm]	RT [min]	# Missed Cleavages
	High	RSsEEVDGQHPAQEEVPESPQTSGPEAENR	2	2	1	B7ZKW8	S3(Phospho)	0	2.60838e+06	1.28712	2	8.3764	0	0.005958	27.83	1.55578	3	3356.44	1.77747	26.9413	1
	High	SQsDcGELGDFr	2	2	1	B7ZKW8	S3(Phospho); C5(Carbamidomethyl); R12(Arg10)	0	2.64765e+06	1.21927	1		0	0.01809	27.8	0.128203	2	1460.54	0.305962	33.0113	0
	High	rSsEEVDGQHPAQEEVPESPQTSGPEAENr	1	2	1	B7ZKW8	R1(Arg10); S3(Phospho); R30(Arg10)	0	2.39457e+06	1.13213	1		0	0.002391	24.66	3.26727	3	3376.45	2.36421	27.247	1
	High	SSEEVDGQHPAQEEVPEsPQTSGPEAENr	3	2	1	B7ZKW8	S18(Phospho); R29(Arg10)	0	1.55069e+06	1.21803	1		0	0.001877	22.66	3.82138	3	3210.34	-0.322877	27.4588	0
	High	SSEEVDGQHPAQEEVPEsPQTSGPEAENR	3	2	1	B7ZKW8	S18(Phospho)	0	2.02694e+06	1.23621	1		0	0.0161	15.48	21.0118	3	3200.33	1.76405	27.545	0
	High	AmVSPFHsPPSTPSsPGVR	2	2	1	B7ZKW8	M2(Oxidation); S8(Phospho); S15(Phospho)	0	1.66276e+06	1.69773	2	1.67141	0	0.005892	12.34	19.7029	3	2113.88	-0.56537	33.6842	0
	High	SQsDcGELGDFR	3	2	1	B7ZKW8	S3(Phospho); C5(Carbamidomethyl)	0	3.0678e+06	1.14623	2	1.60253	0.001	0.02646	37.17	0.014179	2	1450.53	2.13758	33.2953	0
E9PS34	Nucleosome assembly protein 1-like 4 (Fragment) OS=Homo sapiens GN=NAP1L4 PE=1 SV=1 - [E9PS34_HUMAN]	69.31	26.32	8	2	2	8	2.86228e+06	0.90227	5	12.3624	133	15.2726	5.12256
	A2	Sequence	# PSMs	# Proteins	# Protein Groups	Protein Group Accessions	Modifications	ΔCn	Area	Light/Heavy	Light/Heavy Count	Light/Heavy Variability [%]	q-Value	PEP	IonScore	Exp Value	Charge	MH+ [Da]	ΔM [ppm]	RT [min]	# Missed Cleavages
	High	EFITGDVEPTDAESEWHsENEEEEk	3	8	1	E9PS34	S18(Phospho); K25(Lys8)	0	4.95158e+06	0.962695	2	2.70548	0	0.0009002	33.45	0.235846	3	3024.21	0.879098	39.9051	0
	High	EFITGDVEPTDAESEWHsENEEEEK	3	8	1	E9PS34	S18(Phospho)	0	4.68068e+06	0.90227	1		0	0.00193	30.35	0.419032	3	3016.19	0.833605	39.9753	0
	High	FYEEVHDLEr	1	8	1	E9PS34	R10(Arg10)	0	772978	0.817209	1		0.002	0.05069	35.13	0.0682244	2	1346.63	0.399257	30.8985	0
	High	FYEEVHDLER	1	8	1	E9PS34		0	528231	0.759496	1		0.008	0.1073	15.78	5.65608	2	1336.62	0.195814	30.7405	0
P07737	Profilin-1 OS=Homo sapiens GN=PFN1 PE=1 SV=2 - [PROF1_HUMAN]	69.13	28.57	2	3	3	10	1.00724e+06	1.09595	8	21.7743	140	15.0446	8.26514
	A2	Sequence	# PSMs	# Proteins	# Protein Groups	Protein Group Accessions	Modifications	ΔCn	Area	Light/Heavy	Light/Heavy Count	Light/Heavy Variability [%]	q-Value	PEP	IonScore	Exp Value	Charge	MH+ [Da]	ΔM [ppm]	RT [min]	# Missed Cleavages
	High	DSLLQDGEFSmDLR	4	2	1	P07737	M11(Oxidation)	0	629615	1.14718	2	21.3914	0	0.0006236	42.92	0.0149706	2	1641.74	0.170033	43.575	0
	High	DSLLQDGEFSmDLr	1	2	1	P07737	M11(Oxidation); R14(Arg10)	0	713061	0.797217	1		0	0.002809	32.95	0.149106	2	1651.75	-0.402985	43.4612	0
	High	STGGAPTFNVTVTK	3	2	1	P07737		0	1.4684e+06	1.01168	3	3.2573	0	0.02153	22.44	1.53032	2	1379.72	0.810069	32.9638	0
	High	DSPSVWAAVPGK	2	1	1	P07737		0	840263	1.97463	2	27.9295	0.002	0.05911	14.72	7.35455	2	1213.62	-0.375869	36.5034	0
P62805	Histone H4 OS=Homo sapiens GN=HIST1H4A PE=1 SV=2 - [H4_HUMAN]	67.1	21.36	1	2	2	6	1.42521e+06	1.41589	5	64.1687	103	11.3604	11.356
	A2	Sequence	# PSMs	# Proteins	# Protein Groups	Protein Group Accessions	Modifications	ΔCn	Area	Light/Heavy	Light/Heavy Count	Light/Heavy Variability [%]	q-Value	PEP	IonScore	Exp Value	Charge	MH+ [Da]	ΔM [ppm]	RT [min]	# Missed Cleavages
	High	ISGLIYEETR	1	1	1	P62805		0	1.51207e+06	1.12661	1		0	0.002968	41.5	0.01372	2	1180.62	0.0219445	33.7145	0
	High	DNIQGITKPAIR	3	1	1	P62805		0	1.33836e+06	100	3	0	0	0.005739	39.65	0.0185948	2	1325.75	0.143676	28.675	0
	High	ISGLIYEETr	1	1	1	P62805	R10(Arg10)	0	1.46285e+06	0.952824	1		0	0.01297	16.06	4.74055	2	1190.63	-0.054073	33.9357	0
	High	DNIQGITkPAIr	1	1	1	P62805	K8(Lys8); R12(Arg10)	0	851342				0.008	0.1063	20.23	1.18078	2	1343.78	4.22433	28.6805	0
P25705-2	Isoform 2 of ATP synthase subunit alpha, mitochondrial OS=Homo sapiens GN=ATP5A1 - [ATPA_HUMAN]	63.2952	11.73	6	5	5	11	1.00785e+06	1.07001	5	43.5135	503	54.4597	8.23584
	A2	Sequence	# PSMs	# Proteins	# Protein Groups	Protein Group Accessions	Modifications	ΔCn	Area	Light/Heavy	Light/Heavy Count	Light/Heavy Variability [%]	q-Value	PEP	IonScore	Exp Value	Charge	MH+ [Da]	ΔM [ppm]	RT [min]	# Missed Cleavages
	High	VVDALGNAIDGk	3	6	1	P25705-2	K12(Lys8)	0	841381	1.07001	3	4.22534	0	0.001011	43.76	0.00739848	2	1179.65	0.450706	33.0035	0
	High	VLSIGDGIAr	1	6	1	P25705-2	R10(Arg10)	0	1.06892e+06	0.614403	1		0	0.02327	35.91	0.0292992	2	1010.59	-0.543239	34.1488	0
	High	VLSIGDGIAR	1	6	1	P25705-2		0	656745				0	0.01654	26.91	0.230389	2	1000.58	-0.0924368	34.1435	0
	High	TGAIVDVPVGEELLGR	2	6	1	P25705-2		0	753408				0.001	0.04441	14.67	9.30092	2	1624.89	-0.983258	48.8235	0
	High	TGAIVDVPVGEELLGr	1	6	1	P25705-2	R16(Arg10)	0	0				0.003	0.06685	17.63	4.58987	2	1634.89	-2.52578	48.8322	0
	High	VVDALGNAIDGK	1	6	1	P25705-2		0	957131				0.005	0.07945	25.4	0.53816	2	1171.63	0.174378	32.935	0
	High	HALIIYDDLSK	1	2	1	P25705-2		0	0				0.005	0.08847	13.98	8.83078	2	1287.69	-1.69686	36.7967	0
	High	AVDSLVPIGR	1	4	1	P25705-2		0	997489	1.41699	1		0.008	0.1035	19.46	1.33567	2	1026.59	0.123369	35.8536	0
P78559	Microtubule-associated protein 1A OS=Homo sapiens GN=MAP1A PE=1 SV=6 - [MAP1A_HUMAN]	62.0533	3.71	3	4	4	14	3.15822e+06	1.32847	8	11.1369	2803	305.298	4.91943
	A2	Sequence	# PSMs	# Proteins	# Protein Groups	Protein Group Accessions	Modifications	ΔCn	Area	Light/Heavy	Light/Heavy Count	Light/Heavy Variability [%]	q-Value	PEP	IonScore	Exp Value	Charge	MH+ [Da]	ΔM [ppm]	RT [min]	# Missed Cleavages
	High	VPPPRsPQAQEAPVNIDEGLTGcTIQLLPAQDK	5	3	1	P78559	S6(Phospho); C23(Carbamidomethyl)	0	4.81659e+06	1.32847	2	0.0119339	0	0.007689	39.1	0.113332	3	3619.79	2.60875	49.7422	1
	High	TEATQGLDYVPSAGTIsPtSSLEEDKGFK	2	3	1	P78559	S17(Phospho); T19(Phospho)	0	1.02296e+06	1.39519	2	26.9457	0	0.008803	31.47	0.695566	3	3188.39	-0.699187	43.9188	1
	High	VPPPrsPQAQEAPVNIDEGLTGcTIQLLPAQDk	3	3	1	P78559	R5(Arg10); S6(Phospho); C23(Carbamidomethyl); K33(Lys8)	0	3.38894e+06	1.38279	1		0	0.01729	25.16	2.50979	3	3637.82	3.66767	49.5063	1
	High	GQDVVQEWQEtSPTREEPAGEQK	1	3	1	P78559	T11(Phospho)	0	1.67492e+06	0.966174	1		0	0.02067	11.94	46.4384	3	2708.18	0.205287	34.36	1
	High	SPFEIIsPPAsPPEmVGQR	2	3	1	P78559	S7(Phospho); S11(Phospho); M15(Oxidation)	0	2.98315e+06	1.19145	1		0.001	0.04599	23.93	1.90009	2	2214.96	1.6827	46.2207	0
	High	SPFEIIsPPAsPPEmVGQr	1	3	1	P78559	S7(Phospho); S11(Phospho); M15(Oxidation); R19(Arg10)	0	2.76125e+06	1.38395	1		0.003	0.06338	19.05	6.00043	2	2224.97	3.2256	46.5439	0
E9PQ49	Elongation factor 1-delta (Fragment) OS=Homo sapiens GN=EEF1D PE=1 SV=2 - [E9PQ49_HUMAN]	59.66	28.28	7	2	2	7	1.57683e+06	1.07467	4	16.5597	198	21.811	5.52881
	A2	Sequence	# PSMs	# Proteins	# Protein Groups	Protein Group Accessions	Modifications	ΔCn	Area	Light/Heavy	Light/Heavy Count	Light/Heavy Variability [%]	q-Value	PEP	IonScore	Exp Value	Charge	MH+ [Da]	ΔM [ppm]	RT [min]	# Missed Cleavages
	High	KPATPAEDDEDDDIDLFGsDNEEEDKEAAQLR	2	7	1	E9PQ49	S19(Phospho)	0	2.58475e+06	1.41495	1		0	0.009704	50.9	0.00811489	3	3657.52	-0.132262	42.0343	1
	High	kPATPAEDDEDDDIDLFGsDNEEEDkEAAQLr	4	7	1	E9PQ49	K1(Lys8); S19(Phospho); K26(Lys8); R32(Arg10)	0	2.28567e+06	1.07467	2	9.01659	0	0.009155	32.69	0.573876	3	3683.56	0.817247	41.9336	1
	High	SLAGSSGPGASSGTSGDHGELVVR	1	7	1	E9PQ49		0	568908	0.914685	1		0.002	0.05715	12.49	35.7854	3	2185.05	1.1629	28.5635	0
P08670	Vimentin OS=Homo sapiens GN=VIM PE=1 SV=4 - [VIME_HUMAN]	56.7767	8.58	1	3	3	4	1.3509e+06	0.522851	3	19.3617	466	53.6191	5.12256
	A2	Sequence	# PSMs	# Proteins	# Protein Groups	Protein Group Accessions	Modifications	ΔCn	Area	Light/Heavy	Light/Heavy Count	Light/Heavy Variability [%]	q-Value	PEP	IonScore	Exp Value	Charge	MH+ [Da]	ΔM [ppm]	RT [min]	# Missed Cleavages
	High	FADLSEAANr	1	1	1	P08670	R10(Arg10)	0	690829	0.673349	1		0	0.00425	50.99	0.0013881	2	1103.54	1.19845	27.8194	0
	High	SLYASSPGGVYATr	2	1	1	P08670	R14(Arg10)	0	1.19715e+06	0.490096	2	9.614	0	0.002642	22.58	1.65264	2	1438.72	1.65383	31.0683	0
	High	DGQVINETSQHHDDLE	1	1	1	P08670		0	2.16474e+06				0.002	0.05024	16.54	7.26127	2	1836.8	1.03326	25.424	0
Q01518-2	Isoform 2 of Adenylyl cyclase-associated protein 1 OS=Homo sapiens GN=CAP1 - [CAP1_HUMAN]	52.16	9.92	2	3	3	12	5.34819e+06	1.21054	9	69.3097	474	51.7977	8.06006
	A2	Sequence	# PSMs	# Proteins	# Protein Groups	Protein Group Accessions	Modifications	ΔCn	Area	Light/Heavy	Light/Heavy Count	Light/Heavy Variability [%]	q-Value	PEP	IonScore	Exp Value	Charge	MH+ [Da]	ΔM [ppm]	RT [min]	# Missed Cleavages
	High	SGPKPFSAPKPQtSPSPK	3	2	1	Q01518-2	T13(Phospho)	0	1.45464e+07	2.67808	3	0.658541	0	0.01995	35.26	0.14002	2	1917.95	0.942589	24.5622	0
	High	ALLVTASQcQQPAENK	3	2	1	Q01518-2	C9(Carbamidomethyl)	0	1.00317e+06	1.08164	2	6.05864	0	0.0002327	32.68	0.216748	2	1757.89	0.441756	28.2703	0
	High	SGPkPFSAPkPQtSPSPk	1	2	1	Q01518-2	K4(Lys8); K10(Lys8); T13(Phospho); K18(Lys8)	0	1.69737e+06	2.33407	1		0	0.0204	26.75	0.954346	2	1941.99	1.05949	24.5851	0
	High	LSDLLAPISEQIk	1	2	1	Q01518-2	K13(Lys8)	0	433765	0.793425	1		0	0.01064	20.47	1.36723	2	1434.83	0.477704	47.0152	0
	High	ALLVTASQcQQPAENk	3	2	1	Q01518-2	C9(Carbamidomethyl); K16(Lys8)	0	964738	1.21054	1		0	0.01558	17.83	6.62067	2	1765.9	1.3164	28.2762	0
	High	LSDLLAPISEQIK	1	2	1	Q01518-2		0	494982	0.895403	1		0.003	0.06225	11.86	10.2143	2	1426.82	1.02094	46.9282	0
A0A087WTS8	Heat shock 70 kDa protein 4 OS=Homo sapiens GN=HSPA4 PE=1 SV=1 - [A0A087WTS8_HUMAN]	51.9033	12.42	3	4	4	9	758560	0.81753	7	61.7186	475	52.566	8.29443
	A2	Sequence	# PSMs	# Proteins	# Protein Groups	Protein Group Accessions	Modifications	ΔCn	Area	Light/Heavy	Light/Heavy Count	Light/Heavy Variability [%]	q-Value	PEP	IonScore	Exp Value	Charge	MH+ [Da]	ΔM [ppm]	RT [min]	# Missed Cleavages
	High	VLATAFDTTLGGr	1	3	1	A0A087WTS8	R13(Arg10)	0	503634	1.16944	1		0	0.01163	36.19	0.0529441	2	1331.72	-2.72916	39.4968	0
	High	AGGIETIANEYSDR	1	3	1	A0A087WTS8		0	350836	1.01975	1		0	0.02141	19.83	3.01369	2	1495.7	1.01205	36.3208	0
	High	VLATAFDTTLGGR	2	3	1	A0A087WTS8		0	713605	1.19927	1		0	0.01949	18.75	2.98175	2	1321.71	0.458663	39.4485	0
	High	GcALQcAILSPAFk	3	3	1	A0A087WTS8	C2(Carbamidomethyl); C6(Carbamidomethyl); K14(Lys8)	0	1.02895e+06	0.399483	3	14.8319	0.001	0.02586	20.28	3.20506	2	1543.79	2.32259	44.8548	0
	High	SNLAYDIVQLPTGLTGIK	1	3	1	A0A087WTS8		0	32036.8				0.001	0.04615	15.8	5.78396	2	1903.06	1.11944	56.1811	0
	High	AGGIETIANEYSDr	1	3	1	A0A087WTS8	R14(Arg10)	0	533125	0.81753	1		0.001	0.03143	15.68	7.93206	2	1505.71	1.02643	36.1741	0
B4DQJ8	6-phosphogluconate dehydrogenase, decarboxylating OS=Homo sapiens GN=PGD PE=1 SV=1 - [B4DQJ8_HUMAN]	49	9.57	4	3	3	7	897028	0.998423	5	23.1024	470	51.8393	7.44482
	A2	Sequence	# PSMs	# Proteins	# Protein Groups	Protein Group Accessions	Modifications	ΔCn	Area	Light/Heavy	Light/Heavy Count	Light/Heavy Variability [%]	q-Value	PEP	IonScore	Exp Value	Charge	MH+ [Da]	ΔM [ppm]	RT [min]	# Missed Cleavages
	High	GILFVGSGVSGGEEGAr	3	4	1	B4DQJ8	R17(Arg10)	0	1.21541e+06	0.859416	2	0.574927	0	0.001986	36.92	0.0696692	2	1601.81	-0.677629	40.054	0
	High	GILFVGSGVSGGEEGAR	2	4	1	B4DQJ8		0	1.20296e+06	0.998423	1		0	0.002453	30.35	0.308093	2	1591.81	1.21531	40.1164	0
	High	LVPLLDTGDIIIDGGNSEYR	1	4	1	B4DQJ8		0	275898	19.716	1		0	0.01666	21.31	3.46283	2	2160.12	0.594969	55.097	0
	High	SFLEDIRK	1	2	1	B4DQJ8		0	1.19978e+06	2.28613	1		0.004	0.07488	12.63	7.81252	2	1007.55	1.06881	32.7392	1
Q9UQ80-2	Isoform 2 of Proliferation-associated protein 2G4 OS=Homo sapiens GN=PA2G4 - [PA2G4_HUMAN]	46.87	10.29	2	2	2	4	1.69482e+06	1.06875	3	10.6977	340	38.0354	7.53271
	A2	Sequence	# PSMs	# Proteins	# Protein Groups	Protein Group Accessions	Modifications	ΔCn	Area	Light/Heavy	Light/Heavy Count	Light/Heavy Variability [%]	q-Value	PEP	IonScore	Exp Value	Charge	MH+ [Da]	ΔM [ppm]	RT [min]	# Missed Cleavages
	High	TAENATSGETLEENEAGD	1	2	1	Q9UQ80-2		0	1.70711e+06				0	3.38e-05	46.87	0.00549745	2	1837.76	1.14899	25.8296	0
	High	LVkPGNQNTQVTEAWNk	2	2	1	Q9UQ80-2	K3(Lys8); K17(Lys8)	0	1.66457e+06	1.01603	2	7.51036	0	0.01011	19.33	4.1871	3	1943.03	1.43007	29.3549	0
	High	LVKPGNQNTQVTEAWNK	1	2	1	Q9UQ80-2		0	1.68253e+06	1.14848	1		0	0.01904	14.65	13.5496	3	1927.01	1.95739	29.2815	0
Q01581	Hydroxymethylglutaryl-CoA synthase, cytoplasmic OS=Homo sapiens GN=HMGCS1 PE=1 SV=2 - [HMCS1_HUMAN]	46.18	13.27	1	4	4	10	3.5522e+06	0.391003	8	33.9528	520	57.2574	5.41455
	A2	Sequence	# PSMs	# Proteins	# Protein Groups	Protein Group Accessions	Modifications	ΔCn	Area	Light/Heavy	Light/Heavy Count	Light/Heavy Variability [%]	q-Value	PEP	IonScore	Exp Value	Charge	MH+ [Da]	ΔM [ppm]	RT [min]	# Missed Cleavages
	High	rPTPNDDTLDEGVGLVHSNIATEHIPsPAk	2	1	1	Q01581	R1(Arg10); S27(Phospho); K30(Lys8)	0	9.44411e+06	0.430576	1		0	5.643e-05	35.64	0.274863	4	3278.59	2.46132	42.7581	0
	High	RPTPNDDTLDEGVGLVHSNIATEHIPsPAK	3	1	1	Q01581	S27(Phospho)	0	4.19268e+06	0.391003	2	10.1534	0	0.0002059	24.34	3.79559	4	3260.56	1.05444	42.6814	0
	High	mLLNDFLNDQNr	3	1	1	Q01581	M1(Oxidation); R12(Arg10)	0	703140	0.275763	3	71.9847	0.001	0.03109	21.95	1.88192	2	1518.73	1.60069	43.3972	0
	High	NSIYSGLEAFGDVk	1	1	1	Q01581	K14(Lys8)	0	332755	0.928448	1		0.001	0.03257	15.8	7.9684	2	1507.75	0.86959	46.4853	0
	High	TGVAPDVFAENmk	1	1	1	Q01581	M12(Oxidation); K13(Lys8)	0	509344	0.0132894	1		0.001	0.03186	12.34	14.9595	2	1402.68	-0.440958	33.2735	0
A8MX94	Glutathione S-transferase P OS=Homo sapiens GN=GSTP1 PE=1 SV=1 - [A8MX94_HUMAN]	43.8637	17.24	2	2	2	5	269635	1.76722	2	11.2137	174	19.468	5.97314
	A2	Sequence	# PSMs	# Proteins	# Protein Groups	Protein Group Accessions	Modifications	ΔCn	Area	Light/Heavy	Light/Heavy Count	Light/Heavy Variability [%]	q-Value	PEP	IonScore	Exp Value	Charge	MH+ [Da]	ΔM [ppm]	RT [min]	# Missed Cleavages
	High	PPYTVVYFPVr	2	2	1	A8MX94	R11(Arg10)	0	248583	1.90562	1		0	0.006979	38.12	0.0330309	2	1347.73	-0.0699424	45.5581	0
	High	PPYTVVYFPVR	2	2	1	A8MX94		0	473705	1.63888	1		0	0.00677	35.74	0.0589909	2	1337.73	1.36581	45.6897	0
	High	DQQEAALVDmVNDGVEDLr	1	2	1	A8MX94	M10(Oxidation); R19(Arg10)	0	65565.5				0	0.02029	19.28	6.67176	2	2142.98	-1.45043	46.5977	0
H0Y4R1	Inosine-5'-monophosphate dehydrogenase 2 (Fragment) OS=Homo sapiens GN=IMPDH2 PE=1 SV=1 - [H0Y4R1_HUMAN]	43.11	6.6	2	2	2	4	670514	1.07521	4	27.1673	470	51.0352	8.17725
	A2	Sequence	# PSMs	# Proteins	# Protein Groups	Protein Group Accessions	Modifications	ΔCn	Area	Light/Heavy	Light/Heavy Count	Light/Heavy Variability [%]	q-Value	PEP	IonScore	Exp Value	Charge	MH+ [Da]	ΔM [ppm]	RT [min]	# Missed Cleavages
	High	NLIDAGVDALr	3	2	1	H0Y4R1	R11(Arg10)	0	386263	0.991878	3	30.1007	0	0.02197	31.28	0.139302	2	1166.64	0.442672	43.3473	0
	High	DkYPNLQVIGGNVVTAAQAk	1	2	1	H0Y4R1	K2(Lys8); K20(Lys8)	0	954765	1.16554	1		0	0.002777	21.91	1.70318	3	2102.16	0.555283	43.1355	1
V9GYZ6	Bifunctional glutamate/proline--tRNA ligase (Fragment) OS=Homo sapiens GN=EPRS PE=1 SV=1 - [V9GYZ6_HUMAN]	41	4.34	2	2	2	9	6.06945e+06	1.89391	6	6.05623	968	108.972	7.7085
	A2	Sequence	# PSMs	# Proteins	# Protein Groups	Protein Group Accessions	Modifications	ΔCn	Area	Light/Heavy	Light/Heavy Count	Light/Heavy Variability [%]	q-Value	PEP	IonScore	Exp Value	Charge	MH+ [Da]	ΔM [ppm]	RT [min]	# Missed Cleavages
	High	EYIPGQPPLSQSSDSsPTR	2	2	1	V9GYZ6	S16(Phospho)	0	1.11356e+07	1.89015	1		0	0.00157	35.43	0.13496	2	2125.95	1.86232	34.7913	0
	High	EYIPGQPPLSQsSDSsPTR	2	2	1	V9GYZ6	S12(Phospho); S16(Phospho)	0	3.14775e+06	1.90978	2	10.1207	0	0.001979	29.17	0.420925	2	2205.91	1.45263	36.3112	0
	High	EYIPGQPPLSQSSDSSPtr	4	2	1	V9GYZ6	T18(Phospho); R19(Arg10)	0	5.89139e+06	1.91665	2	1.47409	0	0.005185	20.77	3.98371	2	2135.96	1.52558	34.8108	0
	High	ERPTPSLNNNcTTSEDSLVLYNR	1	2	1	V9GYZ6	C11(Carbamidomethyl)	0	1.0033e+06	1.16203	1		0	0.01011	16.17	20.1268	3	2680.27	1.63677	36.9149	0
P55072	Transitional endoplasmic reticulum ATPase OS=Homo sapiens GN=VCP PE=1 SV=4 - [TERA_HUMAN]	40.71	3.1	1	2	2	2	616783	8.05038	2	38511.1	806	89.2657	5.26221
	A2	Sequence	# PSMs	# Proteins	# Protein Groups	Protein Group Accessions	Modifications	ΔCn	Area	Light/Heavy	Light/Heavy Count	Light/Heavy Variability [%]	q-Value	PEP	IonScore	Exp Value	Charge	MH+ [Da]	ΔM [ppm]	RT [min]	# Missed Cleavages
	High	LDQLIYIPLPDEk	1	1	1	P55072	K13(Lys8)	0	648782	0.785276	1		0	0.001578	40.71	0.0182362	2	1564.87	1.14653	51.5374	0
	High	WALSQSNPSALR	1	1	1	P55072		0	584784	82.5298	1		0.005	0.08627	20.59	2.35222	2	1329.69	0.225976	35.8661	0
P06400	Retinoblastoma-associated protein OS=Homo sapiens GN=RB1 PE=1 SV=2 - [RB_HUMAN]	40.24	5.93	1	2	2	3	9.44759e+06	1.82402	3	53.7705	928	106.092	7.94287
	A2	Sequence	# PSMs	# Proteins	# Protein Groups	Protein Group Accessions	Modifications	ΔCn	Area	Light/Heavy	Light/Heavy Count	Light/Heavy Variability [%]	q-Value	PEP	IonScore	Exp Value	Charge	MH+ [Da]	ΔM [ppm]	RT [min]	# Missed Cleavages
	High	KTAATAAAAAAEPPAPPPPPPPEEDPEQDsGPEDLPLVR	2	1	1	P06400	S30(Phospho)	0	3.75209e+06	2.31976	2	36.8077	0	7.879e-05	40.24	0.11369	3	3976.89	0.777146	42.7306	1
	High	IPGGNIYIsPLKsPYK	1	1	1	P06400	S9(Phospho); S13(Phospho)	0	1.51431e+07	1.2984	1		0.001	0.02723	13.98	19.5253	2	1906.91	0.41838	42.9825	1
Q01813	ATP-dependent 6-phosphofructokinase, platelet type OS=Homo sapiens GN=PFKP PE=1 SV=2 - [PFKAP_HUMAN]	39.23	3.95	1	2	2	3	1.13862e+06	1.1186	3	13.3015	784	85.5415	7.54736
	A2	Sequence	# PSMs	# Proteins	# Protein Groups	Protein Group Accessions	Modifications	ΔCn	Area	Light/Heavy	Light/Heavy Count	Light/Heavy Variability [%]	q-Value	PEP	IonScore	Exp Value	Charge	MH+ [Da]	ΔM [ppm]	RT [min]	# Missed Cleavages
	High	AIGVLTSGGDAQGmNAAVR	1	1	1	Q01813	M14(Oxidation)	0	393874	1.1186	1		0	0.001965	21.48	3.09129	2	1803.9	1.09202	31.4562	0
	High	AIGVLTSGGDAQGmNAAVr	1	1	1	Q01813	M14(Oxidation); R19(Arg10)	0	335294	1.28699	1		0	0.001713	18.73	5.55095	2	1813.91	0.497842	31.377	0
	High	GrsFAGNLNTYk	1	1	1	Q01813	R2(Arg10); S3(Phospho); K12(Lys8)	0	1.88337e+06	1.02301	1		0.006	0.09797	33.02	0.127315	2	1425.66	0.12902	29.5144	1
H3BU31	60S ribosomal protein L4 (Fragment) OS=Homo sapiens GN=RPL4 PE=1 SV=1 - [H3BU31_HUMAN]	39	19.3	2	2	2	5	1.5653e+06	0.941037	4	17.2365	171	18.9541	11.7222
	A2	Sequence	# PSMs	# Proteins	# Protein Groups	Protein Group Accessions	Modifications	ΔCn	Area	Light/Heavy	Light/Heavy Count	Light/Heavy Variability [%]	q-Value	PEP	IonScore	Exp Value	Charge	MH+ [Da]	ΔM [ppm]	RT [min]	# Missed Cleavages
	High	QPYAVSELAGHQTSAESWGTGr	3	2	1	H3BU31	R22(Arg10)	0	1.75111e+06	0.868745	3	14.4464	0	0.002353	39.44	0.0767102	3	2342.11	1.50743	37.515	0
	High	QPYAVSELAGHQTSAESWGTGR	1	2	1	H3BU31		0	1.50095e+06				0.001	0.02542	14.53	23.9647	3	2332.09	-2.37316	37.5518	0
	High	AAAAAAALQAK	1	2	1	H3BU31		0	1.3795e+06	1.0943	1		0.001	0.02623	11.65	8.08042	2	956.553	0.185634	20.5804	0
P35527	Keratin, type I cytoskeletal 9 OS=Homo sapiens GN=KRT9 PE=1 SV=3 - [K1C9_HUMAN]	38.05	7.7	1	3	3	7	6.2304e+06	100	4	0	623	62.0268	5.23682
	A2	Sequence	# PSMs	# Proteins	# Protein Groups	Protein Group Accessions	Modifications	ΔCn	Area	Light/Heavy	Light/Heavy Count	Light/Heavy Variability [%]	q-Value	PEP	IonScore	Exp Value	Charge	MH+ [Da]	ΔM [ppm]	RT [min]	# Missed Cleavages
	High	GGSGGSYGGGGSGGGYGGGSGSR	3	1	1	P35527		0	3.16953e+06	100	2	0	0	0.0001612	23.82	0.879495	2	1791.73	-0.528574	16.3847	0
	High	SGGGGGGGLGSGGSIR	3	1	1	P35527		0	14498579	100	1		0	0.01538	13.57	8.57326	2	1232.6	0.541166	19.3384	0
	High	TLLDIDNTR	1	1	1	P35527		0	1.02311e+06	100	1		0.008	0.1044	34.23	0.0656032	2	1060.56	-0.0766379	34.16	0
H0YKH0	Transducin-like enhancer protein 3 OS=Homo sapiens GN=TLE3 PE=4 SV=1 - [H0YKH0_HUMAN]	37.4033	7.64	15	2	2	8	3.48142e+06	1.0386	5	4.9954	445	47.7316	7.38623
	A2	Sequence	# PSMs	# Proteins	# Protein Groups	Protein Group Accessions	Modifications	ΔCn	Area	Light/Heavy	Light/Heavy Count	Light/Heavy Variability [%]	q-Value	PEP	IonScore	Exp Value	Charge	MH+ [Da]	ΔM [ppm]	RT [min]	# Missed Cleavages
	High	DAPTsPASVASSSSTPSSk	2	15	1	H0YKH0	S5(Phospho); K19(Lys8)	0	2.49879e+06	1.09077	1		0	0.01156	26.42	0.808153	2	1851.81	0.990315	24.4193	0
	High	DAPtSPASVASSSSTPSSK	3	15	1	H0YKH0	T4(Phospho)	0	2.5647e+06	1.03247	2	0.877372	0	0.002277	25.07	1.02811	2	1843.8	0.949481	24.8897	0
	High	ESSANNSVsPSESLR	1	15	1	H0YKH0	S9(Phospho)	0	4.39813e+06	1.11812	1		0	0.0145	16.38	4.71105	2	1643.69	-0.116125	24.3339	0
	High	ESSANNSVsPSESLr	2	15	1	H0YKH0	S9(Phospho); R15(Arg10)	0	3.93351e+06	1.00421	1		0.001	0.0239	10.06	20.2089	2	1653.7	0.0514294	24.2901	0
D6R9Q9	Drebrin OS=Homo sapiens GN=DBN1 PE=1 SV=1 - [D6R9Q9_HUMAN]	34.94	6.91	4	2	2	4	1.43423e+06	1.84374	2	16.6546	391	41.422	4.4751
	A2	Sequence	# PSMs	# Proteins	# Protein Groups	Protein Group Accessions	Modifications	ΔCn	Area	Light/Heavy	Light/Heavy Count	Light/Heavy Variability [%]	q-Value	PEP	IonScore	Exp Value	Charge	MH+ [Da]	ΔM [ppm]	RT [min]	# Missed Cleavages
	High	sPSDSSTASTPVAEQIER	1	4	1	D6R9Q9	S1(Phospho)	0	909890	1.6491	1		0	0.001421	34.9	0.123758	2	1941.85	1.88347	31.2083	0
	High	mAPTPIPtRSPSDSSTASTPVAEQIER	2	4	1	D6R9Q9	M1(Oxidation); T8(Phospho)	0	1.95857e+06	2.06136	1		0	0.00739	19.49	10.5387	3	2922.36	1.75453	35.7696	1
	High	SPsDSSTASTPVAEQIEr	1	4	1	D6R9Q9	S3(Phospho); R18(Arg10)	0	551748				0	0.009477	17.04	7.8713	2	1951.86	1.70247	31.2211	0
P55884	Eukaryotic translation initiation factor 3 subunit B OS=Homo sapiens GN=EIF3B PE=1 SV=3 - [EIF3B_HUMAN]	34.84	8.72	2	2	2	2	2.26986e+06	1.93388	2	68.8998	814	92.4238	4.99561
	A2	Sequence	# PSMs	# Proteins	# Protein Groups	Protein Group Accessions	Modifications	ΔCn	Area	Light/Heavy	Light/Heavy Count	Light/Heavy Variability [%]	q-Value	PEP	IonScore	Exp Value	Charge	MH+ [Da]	ΔM [ppm]	RT [min]	# Missed Cleavages
	High	TEPAAEAEAASGPSESPsPPAAEELPGSHAEPPVPAQGEAPGEQAR	1	2	1	P55884	S18(Phospho)	0	3.92776e+06	2.94444	1		0	0.003419	34.84	0.470686	3	4538.02	-2.18583	37.373	0
	High	DRPQEADGIDSVIVVDNVPQVGPDR	1	2	1	P55884		0	611955	1.27015	1		0.001	0.03807	14.42	25.5734	3	2690.34	1.18254	44.4622	0
A0A087WWY3	Filamin-A OS=Homo sapiens GN=FLNA PE=1 SV=1 - [A0A087WWY3_HUMAN]	34.13	2.12	5	3	3	6	1.05129e+06	1.23286	4	7.46856	2315	245.697	5.97314
	A2	Sequence	# PSMs	# Proteins	# Protein Groups	Protein Group Accessions	Modifications	ΔCn	Area	Light/Heavy	Light/Heavy Count	Light/Heavy Variability [%]	q-Value	PEP	IonScore	Exp Value	Charge	MH+ [Da]	ΔM [ppm]	RT [min]	# Missed Cleavages
	High	VTAQGPGLEPSGNIANK	3	5	1	A0A087WWY3		0	1.48014e+06	1.27427	3	5.12387	0	0.005036	34.75	0.115932	2	1652.86	1.53023	28.328	0
	High	VANPSGNLTETYVQDr	1	5	1	A0A087WWY3	R16(Arg10)	0	673359	1.02472	1		0	0.002044	26.88	0.873487	2	1773.87	3.63768	32.6718	0
	High	AFGPGLQGGSAGSPAR	1	5	1	A0A087WWY3		0	1.00037e+06				0.001	0.02503	10.26	27.6633	2	1429.72	0.575295	28.2786	0
	High	VTAQGPGLEPSGNIANk	1	5	1	A0A087WWY3	K17(Lys8)	0	1.04372e+06				0.004	0.06892	12.05	21.6186	2	1660.88	1.20547	28.3012	0
Q9Y490	Talin-1 OS=Homo sapiens GN=TLN1 PE=1 SV=3 - [TLN1_HUMAN]	32.67	1.34	1	2	2	2	329787	5.56343	2	1118.86	2541	269.599	6.07471
	A2	Sequence	# PSMs	# Proteins	# Protein Groups	Protein Group Accessions	Modifications	ΔCn	Area	Light/Heavy	Light/Heavy Count	Light/Heavy Variability [%]	q-Value	PEP	IonScore	Exp Value	Charge	MH+ [Da]	ΔM [ppm]	RT [min]	# Missed Cleavages
	High	LNEAAAGLNQAATELVQASR	1	1	1	Q9Y490		0	258071	24.5264	1		0	0.001378	27.88	0.712002	2	2027.05	0.769075	48.4188	0
	High	LAQAAQSSVATITR	1	1	1	Q9Y490		0	401503	1.26198	1		0	0.006542	20.79	1.93456	2	1416.78	0.160941	28.7906	0
Q8N1G4	Leucine-rich repeat-containing protein 47 OS=Homo sapiens GN=LRRC47 PE=1 SV=1 - [LRC47_HUMAN]	27.89	5.83	1	2	2	6	1.78298e+06	1.68879	5	20.1017	583	63.4337	8.27979
	A2	Sequence	# PSMs	# Proteins	# Protein Groups	Protein Group Accessions	Modifications	ΔCn	Area	Light/Heavy	Light/Heavy Count	Light/Heavy Variability [%]	q-Value	PEP	IonScore	Exp Value	Charge	MH+ [Da]	ΔM [ppm]	RT [min]	# Missed Cleavages
	High	EEGsLSDTEADAVSGQLPDPTTNPSAGK	2	1	1	Q8N1G4	S4(Phospho)	0	561061	5.96299	2	559.714	0	0.0129	27.89	1.20835	2	2853.23	-0.376497	40.5274	0
	High	YTLENKEEGSLSDtEADAVSGQLPDPTTNPSAGK	3	1	1	Q8N1G4	T14(Phospho)	0	3.0049e+06	1.47664	3	9.1613	0.001	0.02858	21.75	8.10534	3	3601.62	3.01379	41.188	1
	High	YTLENkEEGSLSDtEADAVSGQLPDPTTNPSAGk	1	1	1	Q8N1G4	K6(Lys8); T14(Phospho); K34(Lys8)	0	1.37838e+06				0.005	0.07601	11.81	78.1352	3	3617.63	-0.665284	41.2133	1
Q12906-4	Isoform 4 of Interleukin enhancer-binding factor 3 OS=Homo sapiens GN=ILF3 - [ILF3_HUMAN]	27.19	6.45	3	2	2	6	6.93372e+06	1.41938	5	2.52902	698	75.4608	8.41162
	A2	Sequence	# PSMs	# Proteins	# Protein Groups	Protein Group Accessions	Modifications	ΔCn	Area	Light/Heavy	Light/Heavy Count	Light/Heavy Variability [%]	q-Value	PEP	IonScore	Exp Value	Charge	MH+ [Da]	ΔM [ppm]	RT [min]	# Missed Cleavages
	High	GEDsAEETEAKPAVVAPAPVVEAVSTPSAAFPSDATAENVK	1	3	1	Q12906-4	S4(Phospho)	0	2.70766e+06	1.39538	1		0	0.0001069	27.19	2.57544	3	4118.94	0.661312	48.0913	0
	High	GEDsAEETEAkPAVVAPAPVVEAVSTPSAAFPSDATAENVk	2	3	1	Q12906-4	S4(Phospho); K11(Lys8); K41(Lys8)	0	1.94045e+06	1.42907	1		0	0.005515	17.29	22.5935	3	4134.98	5.15673	48.1038	0
	High	DSSKGEDsAEETEAKPAVVAPAPVVEAVSTPSAAFPSDATAENVK	2	3	1	Q12906-4	S8(Phospho)	0	1.11598e+07	1.37471	2	4.74374	0	0.01308	11.76	89.6588	3	4536.13	2.71168	46.5151	1
	High	DSSkGEDsAEETEAkPAVVAPAPVVEAVSTPSAAFPSDATAENVk	1	3	1	Q12906-4	K4(Lys8); S8(Phospho); K15(Lys8); K45(Lys8)	0	1.45541e+06	2.32756	1		0	0.008075	10.3	119.205	3	4560.16	-0.219199	46.6243	1
Q8NC51-4	Isoform 4 of Plasminogen activator inhibitor 1 RNA-binding protein OS=Homo sapiens GN=SERBP1 - [PAIRB_HUMAN]	27.11	8.79	4	2	2	2	62549.3				387	42.4013	8.44092
	A2	Sequence	# PSMs	# Proteins	# Protein Groups	Protein Group Accessions	Modifications	ΔCn	Area	Light/Heavy	Light/Heavy Count	Light/Heavy Variability [%]	q-Value	PEP	IonScore	Exp Value	Charge	MH+ [Da]	ΔM [ppm]	RT [min]	# Missed Cleavages
	High	FDQLFDDESDPFEVLk	1	4	1	Q8NC51-4	K16(Lys8)	0	0				0	0.01371	27.11	0.92745	2	1951.91	1.18243	55.9745	0
	High	SSASAPDVDDPEAFPALA	1	4	1	Q8NC51-4		0	62549.3				0.002	0.0593	15.86	9.87864	2	1759.81	6.2954	45.9786	0
Q9UQ35	Serine/arginine repetitive matrix protein 2 OS=Homo sapiens GN=SRRM2 PE=1 SV=2 - [SRRM2_HUMAN]	26.44	4.58	1	6	6	13	4.15281e+06	1.53199	13	38.4098	2752	299.438	12.0591
	A2	Sequence	# PSMs	# Proteins	# Protein Groups	Protein Group Accessions	Modifications	ΔCn	Area	Light/Heavy	Light/Heavy Count	Light/Heavy Variability [%]	q-Value	PEP	IonScore	Exp Value	Charge	MH+ [Da]	ΔM [ppm]	RT [min]	# Missed Cleavages
	High	mGQAPSQSLLPPAQDQPRsPVPSAFSDQSR	2	1	1	Q9UQ35	M1(Oxidation); S19(Phospho)	0	3.62199e+06	2.17046	2	14.6312	0	0.0134	26	2.78694	3	3275.53	4.76857	39.7154	1
	High	AGmSSNQSISsPVLDAVPRtPSR	2	1	1	Q9UQ35	M3(Oxidation); S11(Phospho); T20(Phospho)	0	1.77452e+06	1.25275	2	30.5095	0	0.01776	24.88	2.17939	3	2533.12	1.65202	37.7413	1
	High	HGGsPQPLATTPLSQEPVNPPSEASPtR	3	1	1	Q9UQ35	S4(Phospho); T27(Phospho)	0	6.29961e+06	1.89763	3	21.0327	0	0.0002046	21.44	6.83376	3	3012.35	1.01923	38.5543	0
	High	GEGDAPFSEPGTTSTQRPSsPETATK	2	1	1	Q9UQ35	S20(Phospho)	0	2.03235e+06	1.14579	2	2.90352	0	0.006831	16.38	15.4922	3	2715.18	0.964584	29.2303	0
	High	RGEGDAPFSEPGTTSTQRPsSPETATK	1	1	1	Q9UQ35	S20(Phospho)	0	2.53683e+06	1.66678	1		0.001	0.0418	11.36	63.2143	3	2871.28	1.27883	27.0074	1
	High	SsTPPGESYFGVSSLQLK	1	1	1	Q9UQ35	S2(Phospho)	0	512426	1.16068	1		0.001	0.04	10.98	36.9152	2	1963.91	2.06264	48.5216	0
	High	rGEGDAPFSEPGTTSTQrPssPETATk	1	1	1	Q9UQ35	R1(Arg10); R18(Arg10); S20(Phospho); S21(Phospho); K27(Lys8)	0	1.06488e+06	1.23391	1		0.004	0.07252	11.03	60.3596	3	2979.28	0.311351	28.723	1
	High	rGEGDAPFSEPGTTSTQrPSsPETATk	1	1	1	Q9UQ35	R1(Arg10); R18(Arg10); S21(Phospho); K27(Lys8)	0	1.59849e+06	1.49138	1		0.009	0.111	15.45	25.7262	3	2899.32	1.75917	27.3486	1
B4DS13	Eukaryotic translation initiation factor 4B OS=Homo sapiens GN=EIF4B PE=1 SV=1 - [B4DS13_HUMAN]	26.43	5.77	3	2	2	7	1.8585e+06	0.836487	4	19.5455	572	64.7671	6.12549
	A2	Sequence	# PSMs	# Proteins	# Protein Groups	Protein Group Accessions	Modifications	ΔCn	Area	Light/Heavy	Light/Heavy Count	Light/Heavy Variability [%]	q-Value	PEP	IonScore	Exp Value	Charge	MH+ [Da]	ΔM [ppm]	RT [min]	# Missed Cleavages
	High	TGsESSQTGTSTTSSr	2	3	1	B4DS13	S3(Phospho); R16(Arg10)	0	2.38011e+06				0	0.005653	16.87	3.37166	2	1663.67	0.219635	14.0725	0
	High	TGSEsSQTGTSTTSSR	2	3	1	B4DS13	S5(Phospho)	0	2.42142e+06	0.734075	2	1.84507	0.001	0.02886	26.43	0.395639	2	1653.66	0.792291	13.968	0
	High	SQsSDTEQQSPTSGGGK	3	3	1	B4DS13	S3(Phospho)	0	1.29558e+06	1.06179	2	17.9848	0.001	0.04011	19.07	2.06322	2	1760.7	1.00973	13.1092	0
B5B2P0	Nuclear factor of activated T-cells c2 isoform IA-IIS-Xa OS=Homo sapiens GN=NFATC2 PE=1 SV=1 - [B5B2P0_HUMAN]	24.75	6.7	5	2	2	2	449955	9.42911	2	13971.6	702	76.6518	8.45557
	A2	Sequence	# PSMs	# Proteins	# Protein Groups	Protein Group Accessions	Modifications	ΔCn	Area	Light/Heavy	Light/Heavy Count	Light/Heavy Variability [%]	q-Value	PEP	IonScore	Exp Value	Charge	MH+ [Da]	ΔM [ppm]	RT [min]	# Missed Cleavages
	High	LSPGsYPTVIQQQNATSQR	1	5	1	B5B2P0	S5(Phospho)	0	586089	78.5562	1		0	0.01594	24.75	1.949	2	2155.02	1.41131	36.9521	0
	High	SKsLsPSLLGYQQPALmAAPLSLADAHR	1	5	1	B5B2P0	S3(Phospho); S5(Phospho); M17(Oxidation)	0	313821	1.13178	1		0.002	0.05	10.59	86.2627	3	3098.49	2.42527	50.246	1
Q9BW71	HIRA-interacting protein 3 OS=Homo sapiens GN=HIRIP3 PE=1 SV=3 - [HIRP3_HUMAN]	23.95	5.22	1	2	2	3	1.39216e+06	1.16527	2	0.0999124	556	61.92	8.54346
	A2	Sequence	# PSMs	# Proteins	# Protein Groups	Protein Group Accessions	Modifications	ΔCn	Area	Light/Heavy	Light/Heavy Count	Light/Heavy Variability [%]	q-Value	PEP	IonScore	Exp Value	Charge	MH+ [Da]	ΔM [ppm]	RT [min]	# Missed Cleavages
	High	EVsDSEAGGGPQGEr	2	1	1	Q9BW71	S3(Phospho); R15(Arg10)	0	2.46528e+06	1.16527	2	0.0999124	0	0.002954	23.95	0.590987	2	1564.62	3.05464	16.5108	0
	High	ESEQEsEEEILAQK	1	1	1	Q9BW71	S6(Phospho)	0	319042				0	0.001875	13.9	9.0031	2	1728.72	1.70437	30.2589	0
Q9NPI6-2	Isoform 2 of mRNA-decapping enzyme 1A OS=Homo sapiens GN=DCP1A - [DCP1A_HUMAN]	20.66	9.01	2	2	2	10	4.76933e+06	2.28667	5	166.415	544	59.3244	6.63916
	A2	Sequence	# PSMs	# Proteins	# Protein Groups	Protein Group Accessions	Modifications	ΔCn	Area	Light/Heavy	Light/Heavy Count	Light/Heavy Variability [%]	q-Value	PEP	IonScore	Exp Value	Charge	MH+ [Da]	ΔM [ppm]	RT [min]	# Missed Cleavages
	High	HAPTYTIPLsPVLsPTLPAEAPTAQVPPSLPr	2	2	1	Q9NPI6-2	S10(Phospho); S14(Phospho); R32(Arg10)	0	1.92015e+06	2.28667	1		0	0.0198	22.2	4.1667	3	3488.77	6.15621	55.394	0
	High	HAPTYTIPLsPVLsPTLPAEAPTAQVPPSLPR	7	2	1	Q9NPI6-2	S10(Phospho); S14(Phospho)	0	8.25937e+06	3.4333	3	455.191	0	0.004906	20.75	6.64618	3	3478.74	0.725818	55.9172	0
	High	kASsPSPLtIGTPESQr	1	2	1	Q9NPI6-2	K1(Lys8); S4(Phospho); T9(Phospho); R17(Arg10)	0	1.27928e+06	0.52416	1		0	0.01381	20.66	3.81746	2	1933.88	1.0464	30.8108	1
Q8ND56-3	Isoform 3 of Protein LSM14 homolog A OS=Homo sapiens GN=LSM14A - [LS14A_HUMAN]	0	7.82	3	2	2	2	6.96326e+06	1.37866	2	1.52663	422	46.3831	9.53955
	A2	Sequence	# PSMs	# Proteins	# Protein Groups	Protein Group Accessions	Modifications	ΔCn	Area	Light/Heavy	Light/Heavy Count	Light/Heavy Variability [%]	q-Value	PEP	IonScore	Exp Value	Charge	MH+ [Da]	ΔM [ppm]	RT [min]	# Missed Cleavages
	High	sPTmEQAVQTASAHLPAPAAVGr	1	3	1	Q8ND56-3	S1(Phospho); M4(Oxidation); R23(Arg10)	0	1.81066e+06	1.36453	1		0	0.01455	12.52	39.4797	3	2396.14	2.79777	38.191	0
	High	SsPQLDPLRKsPTmEQAVQTASAHLPAPAAVGR	1	3	1	Q8ND56-3	S2(Phospho); S11(Phospho); M14(Oxidation)	0	1.21159e+07	1.39292	1		0.004	0.06826	20.23	11.2331	3	3587.71	0.15913	41.6757	2
Q8WWM7-6	Isoform 6 of Ataxin-2-like protein OS=Homo sapiens GN=ATXN2L - [ATX2L_HUMAN]	0	3.51	9	2	2	2	1.44247e+06	0.697275	2	9.59464	968	102.831	8.63135
	A2	Sequence	# PSMs	# Proteins	# Protein Groups	Protein Group Accessions	Modifications	ΔCn	Area	Light/Heavy	Light/Heavy Count	Light/Heavy Variability [%]	q-Value	PEP	IonScore	Exp Value	Charge	MH+ [Da]	ΔM [ppm]	RT [min]	# Missed Cleavages
	High	EVDGLLTSEPmGsPVSSk	1	9	1	Q8WWM7-6	M11(Oxidation); S13(Phospho); K18(Lys8)	0	950883	0.743781	1		0	0.003721	32.84	0.220764	2	1936.87	-0.94615	35.7463	0
	High	GPPQsPVFEGVYNNSr	1	9	1	Q8WWM7-6	S5(Phospho); R16(Arg10)	0	1.93406e+06	0.653677	1		0.004	0.07114	10.74	29.9721	2	1837.82	0.802185	37.4148	0

## Sheet: Cytoskeletal
Accession	Description	Score	Coverage	# Proteins	# Unique Peptides	# Peptides	# PSMs	Area	Light/Heavy	Light/Heavy Count	Light/Heavy Variability [%]	# AAs	MW [kDa]	calc. pI
P62805	Histone H4 OS=Homo sapiens GN=HIST1H4A PE=1 SV=2 - [H4_HUMAN]	503.067	41.75	1	5	5	30	1.85125e+07	1.2113	18	8.78958	103	11.3604	11.356
	A2	Sequence	# PSMs	# Proteins	# Protein Groups	Protein Group Accessions	Modifications	ΔCn	Area	Light/Heavy	Light/Heavy Count	Light/Heavy Variability [%]	q-Value	PEP	IonScore	Exp Value	Charge	MH+ [Da]	ΔM [ppm]	RT [min]	# Missed Cleavages
	High	VFLENVIr	1	1	1	P62805	R8(Arg10)	0	1.26156e+07	1.13848	1		0	0.001568	59.25	0.000141907	2	999.586	0.00790749	41.292	0
	High	TVTAmDVVYALK	4	1	1	P62805	M5(Oxidation)	0	3.919e+06	1.26505	3	4.62865	0	0.0006773	56.46	0.000539779	2	1326.7	1.20292	41.5476	0
	High	DNIQGITkPAIr	6	1	1	P62805	K8(Lys8); R12(Arg10)	0	1.744e+07	1.29485	6	3.33016	0	0.0001219	55.3	0.000428368	2	1343.78	1.31743	29.1896	0
	High	DNIQGITKPAIR	6	1	1	P62805		0	2.2487e+07				0	0.0002035	54.6	0.000582345	2	1325.75	0.97236	29.1841	0
	High	TVTAmDVVYALk	3	1	1	P62805	M5(Oxidation); K12(Lys8)	0	3.36307e+06	1.16073	1		0	0.0005123	53.9	0.000906217	2	1334.71	1.62388	42.0195	0
	High	ISGLIYEETR	3	1	1	P62805		0	17030947	1.14495	3	0.511628	0	0.0007889	53.69	0.000825196	2	1180.62	0.125339	33.8819	0
	High	VFLENVIR	3	1	1	P62805		0	1.60195e+07	1.1472	2	1.60234	0.001	0.002118	61.63	7.94251e-05	2	989.578	0.530973	41.6997	0
	High	ISGLIYEETr	2	1	1	P62805	R10(Arg10)	0	1.43042e+07				0.001	0.004357	42.96	0.00967137	2	1190.63	0.150979	33.8763	0
	High	KTVTAmDVVYALK	2	1	1	P62805	M6(Oxidation)	0	200002	0.972509	2	33.3249	0.002	0.01377	13.75	10.6183	2	1454.79	0.845756	38.854	1
P20700	Lamin-B1 OS=Homo sapiens GN=LMNB1 PE=1 SV=2 - [LMNB1_HUMAN]	464.305	17.41	1	8	9	32	3.41182e+06	1.0668	18	16.7984	586	66.3676	5.16064
	A2	Sequence	# PSMs	# Proteins	# Protein Groups	Protein Group Accessions	Modifications	ΔCn	Area	Light/Heavy	Light/Heavy Count	Light/Heavy Variability [%]	q-Value	PEP	IonScore	Exp Value	Charge	MH+ [Da]	ΔM [ppm]	RT [min]	# Missed Cleavages
	High	IESLSSQLSNLQK	3	1	1	P20700		0	2.6274e+06	0.956515	3	5.92842	0	2.435e-07	75.4	7.6398e-06	2	1446.78	1.04948	39.1367	0
	High	ALYETELADAr	3	1	1	P20700	R11(Arg10)	0	1.09021e+06	1.1962	3	0.59243	0	3.987e-05	66.19	5.82457e-05	2	1261.63	0.910523	33.7834	0
	High	ALYETELADAR	3	1	1	P20700		0	1.41776e+06				0	0.0006471	55.19	0.000684688	2	1251.62	0.112175	34.2911	0
	High	DQmQQQLNDYEQLLDVK	4	1	1	P20700	M3(Oxidation)	0	1.7506e+06	1.03721	2	7.13354	0	8.334e-07	53.52	0.0024388	2	2124	2.20577	48.2502	0
	High	IQELEDLLAk	3	1	1	P20700	K10(Lys8)	0	1.38577e+06	0.973123	2	10.7033	0	0.0003017	42.17	0.0100597	2	1179.67	-0.0611979	43.9457	0
	High	DQmQQQLNDYEQLLDVk	4	1	1	P20700	M3(Oxidation); K17(Lys8)	0	1.64301e+06	0.955152	1		0	5.734e-05	39.18	0.0700774	2	2132.01	2.40828	47.8623	0
	High	IQELEDLLAK	3	1	1	P20700		0	1.35121e+06	1.2951	1		0	0.0007467	36.06	0.0441724	2	1171.66	-0.0284637	43.4981	0
	High	IESLSSQLSNLQk	1	1	1	P20700	K13(Lys8)	0	2.65304e+06				0	0.001531	35.53	0.0708142	2	1454.8	2.0239	38.5123	0
	High	NSQGEEVAQr	2	1	1	P20700	R10(Arg10)	0	1.46624e+06	1.311	2	1.39317	0.002	0.009916	35.45	0.0450746	2	1127.53	0.200065	15.6396	0
	High	NSQGEEVAQR	1	1	1	P20700		0	403761				0.002	0.0109	16.75	3.08992	2	1117.52	-0.591213	15.6341	0
	High	DAALATALGDKK	1	1	1	P20700		0	1.1233e+06	1.015	1		0.004	0.01887	37.96	0.0305995	2	1173.65	0.256786	27.4028	1
	High	NQNSWGTGEDVk	2	1	1	P20700	K12(Lys8)	0	4.04285e+06	0.976701	1		0.004	0.0196	17.08	4.04991	2	1342.61	0.534663	23.7573	0
	High	LLEGEEEr	1	3	2	P20700;Q03252	R8(Arg10)	0	3.53958e+06	1.28073	1		0.008	0.06144	23.42	0.582612	2	984.487	-0.134237	20.206	0
	High	QLADETLLK	1	1	1	P20700		0	910894	1.29564	1		0.008	0.06461	19.64	1.4645	2	1030.58	-0.377509	33.1484	0
P22626-2	Isoform A2 of Heterogeneous nuclear ribonucleoproteins A2/B1 OS=Homo sapiens GN=HNRNPA2B1 - [ROA2_HUMAN]	350.16	25.81	2	5	5	23	2.75078e+06	1.31855	12	5.76439	341	35.9839	8.646
	A2	Sequence	# PSMs	# Proteins	# Protein Groups	Protein Group Accessions	Modifications	ΔCn	Area	Light/Heavy	Light/Heavy Count	Light/Heavy Variability [%]	q-Value	PEP	IonScore	Exp Value	Charge	MH+ [Da]	ΔM [ppm]	RT [min]	# Missed Cleavages
	High	NmGGPYGGGNYGPGGSGGSGGYGGr	6	2	1	P22626-2	M2(Oxidation); R25(Arg10)	0	2.73349e+06	1.32502	3	4.71539	0	1.03128e-13	87.27	6.16592e-07	2	2215.91	-0.0678889	27.4505	0
	High	NmGGPYGGGNYGPGGSGGSGGYGGR	6	2	1	P22626-2	M2(Oxidation)	0	3.49498e+06	1.27236	2	8.95079	0	3.733e-10	68.25	4.91663e-05	2	2205.9	0.802804	27.3861	0
	High	IDTIEIITDR	3	2	1	P22626-2		0	819601	1.38727	3	9.56155	0	0.001023	54.33	0.000763599	2	1188.65	0.137211	40.7942	0
	High	GGGGNFGPGPGSNFR	2	2	1	P22626-2		0	3.93775e+06	1.36485	2	5.84786	0	3.876e-05	40.01	0.0211662	2	1377.63	2.60079	29.4802	0
	High	IDTIEIITDr	2	2	1	P22626-2	R10(Arg10)	0	554680				0.001	0.004133	38.45	0.028635	2	1198.66	1.07913	41.2501	0
	High	GFGDGYNGYGGGPGGGNFGGsPGYGGGR	1	2	1	P22626-2	S21(Phospho)	0	211838	0.616707	1		0.001	0.00233	15.55	8.83897	2	2575.01	0.535733	39.3758	0
	High	GGNFGFGDSr	1	2	1	P22626-2	R10(Arg10)	0	792255	1.3112	1		0.002	0.01659	28.97	0.131265	2	1023.45	0.20877	28.7375	0
	High	GFGDGYNGYGGGPGGGNFGGsPGYGGGr	1	2	1	P22626-2	S21(Phospho); R28(Arg10)	0	539403				0.002	0.005422	12.4	18.7334	2	2585.01	-0.115158	39.3631	0
	High	GGGGNFGPGPGSNFr	1	2	1	P22626-2	R15(Arg10)	0	2.7401e+06				0.008	0.06221	20.81	1.85098	2	1387.64	1.02149	29.9365	0
Q71U36-2	Isoform 2 of Tubulin alpha-1A chain OS=Homo sapiens GN=TUBA1A - [TBA1A_HUMAN]	284.38	27.64	4	7	7	38	2.18507e+06	1.75668	18	32.4277	416	46.2678	5.08447
	A2	Sequence	# PSMs	# Proteins	# Protein Groups	Protein Group Accessions	Modifications	ΔCn	Area	Light/Heavy	Light/Heavy Count	Light/Heavy Variability [%]	q-Value	PEP	IonScore	Exp Value	Charge	MH+ [Da]	ΔM [ppm]	RT [min]	# Missed Cleavages
	High	AVcmLSNTTAIAEAWAR	6	4	1	Q71U36-2	C3(Carbamidomethyl); M4(Oxidation)	0	932311	1.71119	2	4.71331	0	1.111e-05	50.02	0.00460674	2	1880.9	2.48287	45.7808	0
	High	AVcmLSNTTAIAEAWAr	5	4	1	Q71U36-2	C3(Carbamidomethyl); M4(Oxidation); R17(Arg10)	0	582132	1.60155	1		0	6.182e-06	40.31	0.0440833	2	1890.92	5.97255	45.3723	0
	High	TIGGGDDSFNTFFSETGAGK	3	4	1	Q71U36-2		0	1.04937e+06	1.3069	2	10.4604	0	1.104e-05	39.03	0.0542487	2	2007.9	3.81649	47.5972	0
	High	VGINYQPPTVVPGGDLAk	4	4	1	Q71U36-2	K18(Lys8)	0	1.35838e+06	2.26874	3	0.630847	0	1.876e-05	38.91	0.0376011	2	1833	0.916569	41.6972	0
	High	AVFVDLEPTVIDEVR	4	4	1	Q71U36-2		0	578372	4.26347	3	156.332	0	0.0008407	37.62	0.0543508	2	1701.91	2.11535	51.6728	0
	High	TIGGGDDSFNTFFSETGAGk	4	4	1	Q71U36-2	K20(Lys8)	0	706856	1.46774	1		0	2.148e-06	36.06	0.113008	2	2015.91	2.38933	47.6225	0
	High	DYEEVGVDSVEGEGEEEGEEY	2	4	1	Q71U36-2		0	1.23702e+06				0.001	0.00188	26.1	0.659089	2	2348.91	0.988911	41.4224	0
	High	AVFVDLEPTVIDEVr	1	4	1	Q71U36-2	R15(Arg10)	0	68520.2				0.001	0.002026	19.91	3.07813	2	1711.92	1.76501	51.7043	0
	High	VGINYQPPTVVPGGDLAK	3	4	1	Q71U36-2		0	3.18078e+06				0.001	0.002127	16.79	6.68964	2	1824.99	2.48031	42.1181	0
	High	DVNAAIATIK	2	4	1	Q71U36-2		0	987852	1.98446	2	11.7869	0.002	0.006772	50.5	0.00120007	2	1015.58	-0.777969	33.598	0
	High	TIGGGDDsFNTFFSETGAGk	1	4	1	Q71U36-2	S8(Phospho); K20(Lys8)	0	133676	1.09126	1		0.002	0.008989	19.13	4.04721	2	2095.87	-0.0422473	48.9285	0
	High	NLDIErPTYTNLNr	1	3	1	Q71U36-2	R6(Arg10); R14(Arg10)	0	1.33863e+06	1.74699	1		0.004	0.03087	12.89	19.6827	3	1738.9	-0.0147089	34.5285	0
	High	TIGGGDDsFNTFFSETGAGK	1	4	1	Q71U36-2	S8(Phospho)	0	154003	1.00104	1		0.004	0.01903	10.83	24.7935	2	2087.86	1.96406	48.593	0
	High	NLDIERPTYTNLNR	1	3	1	Q71U36-2		0	2.13741e+06	1.49696	1		0.008	0.06501	21.08	3.01989	3	1718.88	0.303227	34.4542	0
B7Z712	60 kDa heat shock protein, mitochondrial OS=Homo sapiens GN=HSPD1 PE=1 SV=1 - [B7Z712_HUMAN]	278.251	23.42	5	2	2	16	1.63679e+06	1.35985	8	6.95946	158	17.0891	9.83252
	A2	Sequence	# PSMs	# Proteins	# Protein Groups	Protein Group Accessions	Modifications	ΔCn	Area	Light/Heavy	Light/Heavy Count	Light/Heavy Variability [%]	q-Value	PEP	IonScore	Exp Value	Charge	MH+ [Da]	ΔM [ppm]	RT [min]	# Missed Cleavages
	High	LVQDVANNTNEEAGDGTTTATVLAr	7	5	1	B7Z712	R25(Arg10)	0	2.24175e+06	1.27654	3	17.672	0	1.239e-13	104.14	2.90978e-08	2	2570.26	0.555617	35.6836	0
	High	LVQDVANNTNEEAGDGTTTATVLAR	6	5	1	B7Z712		0	2.83186e+06	1.38028	3	4.15385	0	1.171e-10	78.21	1.12025e-05	2	2560.25	0.640734	35.1974	0
	High	TVIIEQSWGSPk	3	5	1	B7Z712	K12(Lys8)	0	441713	1.37338	2	6.07805	0	0.00144	38.46	0.0351555	2	1352.73	0.254285	36.742	0
P07910-4	Isoform 4 of Heterogeneous nuclear ribonucleoproteins C1/C2 OS=Homo sapiens GN=HNRNPC - [HNRPC_HUMAN]	267.103	34.4	6	7	7	32	4.98131e+06	1.26292	22	12.2547	250	27.8045	4.69092
	A2	Sequence	# PSMs	# Proteins	# Protein Groups	Protein Group Accessions	Modifications	ΔCn	Area	Light/Heavy	Light/Heavy Count	Light/Heavy Variability [%]	q-Value	PEP	IonScore	Exp Value	Charge	MH+ [Da]	ΔM [ppm]	RT [min]	# Missed Cleavages
	High	mESEGGADDsAEEGDLLDDDDNEDR	4	6	1	P07910-4	M1(Oxidation); S10(Phospho)	0	3.86984e+06	1.18522	4	1.55395	0	0.0001226	42.16	0.00820678	2	2794.97	1.43161	33.9177	0
	High	mESEGGADDsAEEGDLLDDDDNEDr	3	6	1	P07910-4	M1(Oxidation); S10(Phospho); R25(Arg10)	0	3.26792e+06				0	9.011e-06	40.17	0.0143088	2	2804.98	2.30822	33.8863	0
	High	mESEGGADDsAEEGDLLDDDDNEDrGDDQLELIk	2	6	1	P07910-4	M1(Oxidation); S10(Phospho); R25(Arg10); K34(Lys8)	0	2.60893e+06	1.23857	1		0	0.001691	39.34	0.0865528	3	3824.52	1.6187	45.4729	1
	High	mEsEGGADDSAEEGDLLDDDDNEDrGDDQLELIkDDEk	3	6	1	P07910-4	M1(Oxidation); S3(Phospho); R25(Arg10); K34(Lys8); K38(Lys8)	0	5.6427e+06	1.28775	3	1.93566	0	0.000673	36.15	0.200753	4	4319.73	3.73762	42.2161	2
	High	mIAGQVLDINLAAEPK	6	6	1	P07910-4	M1(Oxidation)	0	866643	1.77242	2	39.0893	0	0.001404	34.26	0.119804	2	1698.91	0.722757	45.1885	0
	High	mESEGGADDsAEEGDLLDDDDNEDRGDDQLELIK	2	6	1	P07910-4	M1(Oxidation); S10(Phospho)	0	2.92423e+06	1.12085	1		0	0.0008903	27.43	1.24668	3	3806.49	1.17926	45.4405	1
	High	mIAGQVLDINLAAEPk	1	6	1	P07910-4	M1(Oxidation); K16(Lys8)	0	420118	2.06286	1		0	0.0009076	25.31	0.839455	2	1706.92	0.553578	44.7169	0
	High	mESEGGADDsAEEGDLLDDDDNEDRGDDQLELIKDDEK	3	6	1	P07910-4	M1(Oxidation); S10(Phospho)	0	8.14986e+06	1.19199	2	0.759183	0	0.001163	24.94	2.27517	4	4293.69	1.95145	42.6928	2
	High	GFAFVQYVNER	1	6	1	P07910-4		0	290652	1.3693	1		0.001	0.002232	31.87	0.151643	2	1329.66	-0.216977	44.4864	0
	High	MESEGGADDsAEEGDLLDDDDNEDR	3	6	1	P07910-4	S10(Phospho)	0	588952	1.97151	3	8.29275	0.001	0.002334	23.41	0.686108	2	2778.97	0.400717	35.4293	0
	High	VFIGNLNTLVVk	3	6	1	P07910-4	K12(Lys8)	0	484751	1.17057	3	3.05262	0.001	0.003891	19.12	0.858456	2	1324.81	1.19681	47.5386	0
	High	VPPPPPIAr	1	6	1	P07910-4	R9(Arg10)	0	2.02025e+06	1.79394	1		0.008	0.0681	18.54	1.53535	2	953.581	0.368035	26.5885	0
P16403	Histone H1.2 OS=Homo sapiens GN=HIST1H1C PE=1 SV=2 - [H12_HUMAN]	221.592	15.49	3	4	4	16	4.9138e+06	1.26812	10	16.0774	213	21.3517	10.9312
	A2	Sequence	# PSMs	# Proteins	# Protein Groups	Protein Group Accessions	Modifications	ΔCn	Area	Light/Heavy	Light/Heavy Count	Light/Heavy Variability [%]	q-Value	PEP	IonScore	Exp Value	Charge	MH+ [Da]	ΔM [ppm]	RT [min]	# Missed Cleavages
	High	ALAAAGYDVEk	3	3	1	P16403	K11(Lys8)	0	4.85123e+06	1.22603	3	3.24532	0	0.0004499	51.8	0.00118132	2	1115.58	0.330679	27.1904	0
	High	ALAAAGYDVEK	3	3	1	P16403		0	6.0046e+06				0	0.000984	50.55	0.0015762	2	1107.57	0.368143	27.5906	0
	High	ASGPPVSELITK	4	3	1	P16403		0	6.64206e+06	1.55982	2	6.69743	0	0.001051	45.59	0.00524234	2	1198.67	0.757065	34.9851	0
	High	ASGPPVSELITk	1	3	1	P16403	K12(Lys8)	0	4.16272e+06	1.56	1		0	0.0008944	33.13	0.0898394	2	1206.68	0.214038	35.3955	0
	High	kASGPPVSELITk	1	3	1	P16403	K1(Lys8); K13(Lys8)	0	2.09475e+06	1.50376	1		0.001	0.00223	17.13	2.38761	3	1342.79	-0.00516444	31.7267	1
	High	SGVSLAALk	2	3	1	P16403	K9(Lys8)	0	1.60196e+06	1.19757	2	10.2728	0.002	0.007952	47.96	0.00119567	2	853.523	-0.330919	33.0196	0
	High	SGVSLAALK	2	3	1	P16403		0	1.84254e+06	1.16334	1		0.002	0.009958	41.97	0.00483805	2	845.509	0.14501	33.0816	0
P06899	Histone H2B type 1-J OS=Homo sapiens GN=HIST1H2BJ PE=1 SV=3 - [H2B1J_HUMAN]	208.49	19.05	5	2	2	13	3.85038e+07	1.17752	5	12.9006	126	13.8956	10.3159
	A2	Sequence	# PSMs	# Proteins	# Protein Groups	Protein Group Accessions	Modifications	ΔCn	Area	Light/Heavy	Light/Heavy Count	Light/Heavy Variability [%]	q-Value	PEP	IonScore	Exp Value	Charge	MH+ [Da]	ΔM [ppm]	RT [min]	# Missed Cleavages
	High	AmGImNSFVNDIFEr	6	5	1	P06899	M2(Oxidation); M5(Oxidation); R15(Arg10)	0	2.26884e+06	1.17752	1		0	7.499e-05	54.33	0.00135562	2	1785.82	2.08548	50.3089	0
	High	AmGImNSFVNDIFER	4	5	1	P06899	M2(Oxidation); M5(Oxidation)	0	2.31712e+06	1.03735	2	3.59111	0	1.539e-06	50.18	0.00348214	2	1775.81	1.73563	50.2493	0
	High	LLLPGELAk	2	5	1	P06899	K9(Lys8)	0	5.81652e+07	1.28029	2	0.441577	0.001	0.002068	42.11	0.00246686	2	961.618	0.491963	39.2945	0
	High	LLLPGELAK	1	5	1	P06899		0	7.46904e+07				0.001	0.002286	38.86	0.00553872	2	953.603	0.0887976	39.242	0
P11388	DNA topoisomerase 2-alpha OS=Homo sapiens GN=TOP2A PE=1 SV=3 - [TOP2A_HUMAN]	202.32	3.98	4	4	4	19	2.13388e+06	1.49964	12	16.4857	1531	174.276	8.71924
	A2	Sequence	# PSMs	# Proteins	# Protein Groups	Protein Group Accessions	Modifications	ΔCn	Area	Light/Heavy	Light/Heavy Count	Light/Heavy Variability [%]	q-Value	PEP	IonScore	Exp Value	Charge	MH+ [Da]	ΔM [ppm]	RT [min]	# Missed Cleavages
	High	NENTEGsPQEDGVELEGLk	4	4	1	P11388	S7(Phospho); K19(Lys8)	0	1.7661e+06	1.41863	1		0	2.058e-05	51.66	0.00276381	2	2132.92	1.831	36.7527	0
	High	NENTEGsPQEDGVELEGLK	3	4	1	P11388	S7(Phospho)	0	2.75502e+06	1.52909	2	2.96236	0	3.239e-08	46.58	0.00792988	2	2124.9	0.017862	36.917	0
	High	GSVPLSSsPPATHFPDETEITNPVPK	3	4	1	P11388	S8(Phospho)	0	1.47241e+06	1.70427	2	1.07366	0	0.0001705	15.65	23.2668	3	2784.32	2.69559	44.1726	0
	High	IkNENTEGsPQEDGVELEGLk	4	4	1	P11388	K2(Lys8); S9(Phospho); K21(Lys8)	0	2.1742e+06	1.3918	4	6.68023	0.001	0.002509	38.63	0.0951323	2	2382.11	1.38252	35.1453	1
	High	GSVPLSsSPPATHFPDETEITNPVPk	1	4	1	P11388	S7(Phospho); K26(Lys8)	0	641763	1.8808	1		0.001	0.002757	19	11.0748	3	2792.32	-0.998223	43.8275	0
	High	IKNENTEGsPQEDGVELEGLK	3	4	1	P11388	S9(Phospho)	0	1.41422e+06	3.13933	1		0.001	0.00196	17.29	11.8226	2	2366.08	1.11517	34.5872	1
	High	VPDEEENEEsDNEk	1	4	1	P11388	S10(Phospho); K14(Lys8)	0	842316	1.16976	1		0.006	0.03826	26.84	0.21043	2	1750.64	0.40238	17.2921	0
P04264	Keratin, type II cytoskeletal 1 OS=Homo sapiens GN=KRT1 PE=1 SV=6 - [K2C1_HUMAN]	192.121	13.04	1	5	5	11	3.4913e+06	48.5684	11	68.6912	644	65.999	8.11865
	A2	Sequence	# PSMs	# Proteins	# Protein Groups	Protein Group Accessions	Modifications	ΔCn	Area	Light/Heavy	Light/Heavy Count	Light/Heavy Variability [%]	q-Value	PEP	IonScore	Exp Value	Charge	MH+ [Da]	ΔM [ppm]	RT [min]	# Missed Cleavages
	High	FLEQQNQVLQTK	3	1	1	P04264		0	1.78793e+06	96.4199	3	5.40921	0	0.001033	65.83	7.1521e-05	2	1475.79	0.499423	32.0617	0
	High	QISNLQQSISDAEQR	3	1	1	P04264		0	971618	48.5684	3	3.48178	0	1.065e-05	47.63	0.00705609	2	1716.85	1.45848	36.3633	0
	High	SGGGFSSGSAGIINYQR	3	1	1	P04264		0	626486	31.933	3	1.5018	0	1.169e-05	39.26	0.044579	2	1657.8	1.73885	35.0996	0
	High	GGGGGGYGSGGSSYGSGGGSYGSGGGGGGGR	1	1	1	P04264		0	960460	34.9857	1		0	7.886e-07	23.81	1.4586	2	2383.96	2.24488	22.3702	0
	High	SLVNLGGSK	1	1	1	P04264		0	7.71434e+06	100	1		0.008	0.05892	28.85	0.135399	2	874.499	-0.12372	28.3512	0
K7EK77	ATP synthase subunit alpha, mitochondrial (Fragment) OS=Homo sapiens GN=ATP5A1 PE=1 SV=1 - [K7EK77_HUMAN]	189.04	41.06	3	6	6	18	947249	1.5615	13	25.2857	207	22.186	8.6167
	A2	Sequence	# PSMs	# Proteins	# Protein Groups	Protein Group Accessions	Modifications	ΔCn	Area	Light/Heavy	Light/Heavy Count	Light/Heavy Variability [%]	q-Value	PEP	IonScore	Exp Value	Charge	MH+ [Da]	ΔM [ppm]	RT [min]	# Missed Cleavages
	High	VVDALGNAIDGk	3	3	1	K7EK77	K12(Lys8)	0	777090	1.67199	1		0	2.024e-05	52.53	0.00102591	2	1179.65	-0.480618	33.0532	0
	High	VLSIGDGIAR	2	3	1	K7EK77		0	997033	1.38678	2	7.312	0	0.001506	49.32	0.00132563	2	1000.58	0.761561	34.2964	0
	High	VVDALGNAIDGK	3	3	1	K7EK77		0	1.21343e+06	1.44002	2	12.0515	0	0.0007968	43.49	0.00860057	2	1171.63	-0.242375	33.1131	0
	High	TSIAIDTIINQK	3	3	1	K7EK77		0	374903	1.80166	3	4.34078	0	0.0001785	42.01	0.0121054	2	1316.74	1.708	40.9754	0
	High	TGAIVDVPVGEELLGr	2	3	1	K7EK77	R16(Arg10)	0	474515	2.43464	1		0	0.0002983	24.64	0.912662	2	1634.9	-0.0618146	48.9081	0
	High	TGAIVDVPVGEELLGR	1	3	1	K7EK77		0	631289	1.33039	1		0.001	0.004425	27.76	0.461196	2	1624.89	-0.15688	48.9758	0
	High	TSIAIDTIINQk	1	3	1	K7EK77	K12(Lys8)	0	250066				0.001	0.002265	22.31	1.05307	2	1324.76	1.29976	40.954	0
	High	ILGADTSVDLEETGR	1	3	1	K7EK77		0	368646	1.28163	1		0.001	0.002781	12.58	19.1571	2	1575.79	-0.439978	36.9982	0
	High	GmSLNLEPDNVGVVVFGNDK	2	3	1	K7EK77	M2(Oxidation)	0	230117	4.54072	2	120.725	0.002	0.006885	17.45	10.4137	2	2120.04	2.66765	49.1011	0
E9PCY7	Heterogeneous nuclear ribonucleoprotein H OS=Homo sapiens GN=HNRNPH1 PE=1 SV=1 - [E9PCY7_HUMAN]	188.944	13.05	6	4	4	14	2.30219e+06	1.20091	7	14.729	429	47.0574	6.34131
	A2	Sequence	# PSMs	# Proteins	# Protein Groups	Protein Group Accessions	Modifications	ΔCn	Area	Light/Heavy	Light/Heavy Count	Light/Heavy Variability [%]	q-Value	PEP	IonScore	Exp Value	Charge	MH+ [Da]	ΔM [ppm]	RT [min]	# Missed Cleavages
	High	STGEAFVQFASQEIAEK	5	6	1	E9PCY7		0	702224	1.20091	1		0	2.141e-08	56.07	0.00111228	2	1841.89	0.716999	49.4565	0
	High	STGEAFVQFASQEIAEk	5	6	1	E9PCY7	K17(Lys8)	0	657746	1.00601	2	0.530332	0	0.0002063	42.33	0.0284237	2	1849.91	-0.230927	49.472	0
	High	GLPWScSADEVQR	1	6	1	E9PCY7	C6(Carbamidomethyl)	0	504409	1.29298	1		0.001	0.002032	33.43	0.116436	2	1504.68	0.00586315	36.2715	0
	High	HTGPNsPDTANDGFVr	1	6	1	E9PCY7	S6(Phospho); R16(Arg10)	0	1.94537e+06	1.32564	1		0.001	0.001901	26.39	0.544187	3	1774.74	0.70939	25.7272	0
	High	HTGPNsPDTANDGFVR	1	6	1	E9PCY7	S6(Phospho)	0	5.55255e+06	1.52447	1		0.001	0.002417	21.47	1.77001	2	1764.74	2.15563	25.4014	0
	High	VHIEIGPDGR	1	3	1	E9PCY7		0	651804	1.13504	1		0.008	0.05686	17.55	2.81971	2	1092.58	0.174159	28.1146	0
P13645	Keratin, type I cytoskeletal 10 OS=Homo sapiens GN=KRT10 PE=1 SV=6 - [K1C10_HUMAN]	182.97	5.65	1	3	3	7	2.01813e+06	75.8188	7	42.8323	584	58.7917	5.21143
	A2	Sequence	# PSMs	# Proteins	# Protein Groups	Protein Group Accessions	Modifications	ΔCn	Area	Light/Heavy	Light/Heavy Count	Light/Heavy Variability [%]	q-Value	PEP	IonScore	Exp Value	Charge	MH+ [Da]	ΔM [ppm]	RT [min]	# Missed Cleavages
	High	GSLGGGFSSGGFSGGSFSR	3	1	1	P13645		0	3.60498e+06	100	3	0	0	4.208e-08	75.07	1.08179e-05	2	1707.78	2.30671	39.6239	0
	High	ISSSKGSLGGGFSSGGFSGGSFSR	3	1	1	P13645		0	1.81652e+06	72.748	3	6.13566	0	1.023e-05	36.22	0.144057	3	2210.05	1.28674	37.0564	1
	High	LENEIQTYR	1	1	1	P13645		0	632872	44.7094	1		0.001	0.002631	33.95	0.0743818	2	1165.58	-0.249699	26.815	0
P60709	Actin, cytoplasmic 1 OS=Homo sapiens GN=ACTB PE=1 SV=1 - [ACTB_HUMAN]	175.73	20.8	2	5	5	23	4.26566e+06	2.26025	15	28.3394	375	41.7097	5.47803
	A2	Sequence	# PSMs	# Proteins	# Protein Groups	Protein Group Accessions	Modifications	ΔCn	Area	Light/Heavy	Light/Heavy Count	Light/Heavy Variability [%]	q-Value	PEP	IonScore	Exp Value	Charge	MH+ [Da]	ΔM [ppm]	RT [min]	# Missed Cleavages
	High	DLYANTVLSGGTTmYPGIADR	2	2	1	P60709	M14(Oxidation)	0	663557	1.97979	2	21.0175	0	1.636e-06	46.65	0.0131418	2	2231.06	-0.865247	44.7654	0
	High	SYELPDGQVITIGNER	4	2	1	P60709		0	2.27615e+06	2.21441	2	1.2947	0	1.603e-05	38.19	0.0651801	2	1790.9	2.12645	45.4793	0
	High	VAPEEHPVLLTEAPLNPK	5	2	1	P60709		0	5.78737e+06	3.34041	4	13.3957	0	0.0001035	29.29	0.32867	2	1954.07	1.56145	39.2751	0
	High	GYSFTTTAER	2	2	1	P60709		0	4.73345e+06	1.6733	1		0.001	0.003015	35.75	0.040443	2	1132.53	0.379725	28.0228	0
	High	GYSFTTTAEr	2	2	1	P60709	R10(Arg10)	0	2.79947e+06	1.69084	1		0.001	0.002794	31.85	0.105546	2	1142.54	-0.0231514	27.6995	0
	High	SYELPDGQVITIGNEr	3	2	1	P60709	R16(Arg10)	0	1.08321e+06	1.78777	1		0.001	0.002879	18.05	6.8232	2	1800.9	-0.172335	45.0549	0
	High	QEYDESGPSIVHr	1	2	1	P60709	R13(Arg10)	0	586858	1.87387	1		0.001	0.00268	17.8	4.65265	3	1526.71	-0.505392	26.075	0
	High	VAPEEHPVLLTEAPLNPk	1	2	1	P60709	K18(Lys8)	0	2.26726e+06	2.65361	1		0.001	0.002111	15.21	7.72233	3	1962.08	0.470774	38.7589	0
	High	DLYANTVLSGGTTmYPGIADr	1	2	1	P60709	M14(Oxidation); R21(Arg10)	0	287303				0.001	0.002701	11.7	42.6237	2	2241.07	0.569008	44.8015	0
	High	QEYDESGPSIVHR	2	2	1	P60709		0	955096	2.29689	2	2.38481	0.002	0.006568	13.89	10.7939	3	1516.7	0.0940702	25.6353	0
Q8N9T8	Protein KRI1 homolog OS=Homo sapiens GN=KRI1 PE=1 SV=3 - [KRI1_HUMAN]	160.177	9.25	3	3	3	13	2.31623e+06	1.19921	8	35.485	703	82.5475	5.13525
	A2	Sequence	# PSMs	# Proteins	# Protein Groups	Protein Group Accessions	Modifications	ΔCn	Area	Light/Heavy	Light/Heavy Count	Light/Heavy Variability [%]	q-Value	PEP	IonScore	Exp Value	Charge	MH+ [Da]	ΔM [ppm]	RT [min]	# Missed Cleavages
	High	AFVEDsEDEDGAGEGGSSLLQk	4	3	1	Q8N9T8	S6(Phospho); K22(Lys8)	0	4.19054e+06	0.941292	3	0.410796	0	1.982e-08	65.05	0.000125012	2	2327.97	0.542306	38.3487	0
	High	AFVEDsEDEDGAGEGGSSLLQK	3	3	1	Q8N9T8	S6(Phospho)	0	4.0875e+06	1.00741	1		0	1.214e-08	63.52	0.000165603	2	2319.95	0.139982	38.3423	0
	High	QLPALDGSLmGPEsPPAQEEEAPVsPHk	3	1	1	Q8N9T8	M10(Oxidation); S14(Phospho); S25(Phospho); K28(Lys8)	0	1.65832e+06	1.44194	2	1.48812	0.001	0.003007	19.33	10.6477	3	3095.36	0.718577	41.7049	0
	High	QLPALDGSLmGPEsPPAQEEEAPVSPHK	1	1	1	Q8N9T8	M10(Oxidation); S14(Phospho)	0	974147	17.8395	1		0.001	0.002623	16.87	20.4582	3	3007.39	4.21013	40.8496	0
	High	QLPALDGSLmGPEsPPAQEEEAPVsPHK	1	1	1	Q8N9T8	M10(Oxidation); S14(Phospho); S25(Phospho)	0	2.33271e+06				0.001	0.003022	11.79	61.116	3	3087.35	3.34259	41.1836	0
	High	YVDEENsDGETSNHR	1	3	1	Q8N9T8	S7(Phospho)	0	425438	1.50206	1		0.007	0.04512	13.22	5.74099	2	1831.68	-0.482319	15.8872	0
H0YH81	ATP synthase subunit beta (Fragment) OS=Homo sapiens GN=ATP5B PE=1 SV=1 - [H0YH81_HUMAN]	157.439	22.65	2	5	5	21	713681	1.34413	13	20.2588	362	38.2249	5.5542
	A2	Sequence	# PSMs	# Proteins	# Protein Groups	Protein Group Accessions	Modifications	ΔCn	Area	Light/Heavy	Light/Heavy Count	Light/Heavy Variability [%]	q-Value	PEP	IonScore	Exp Value	Charge	MH+ [Da]	ΔM [ppm]	RT [min]	# Missed Cleavages
	High	FTQAGSEVSALLGR	3	2	1	H0YH81		0	769503	1.24567	2	11.315	0	4.048e-05	46.36	0.00636165	2	1435.76	1.46948	43.6703	0
	High	FTQAGSEVSALLGr	4	2	1	H0YH81	R14(Arg10)	0	541717	1.26741	1		0	3.363e-05	41.24	0.0210304	2	1445.76	1.56572	43.6761	0
	High	AIAELGIYPAVDPLDSTSR	4	2	1	H0YH81		0	556796	1.53883	1		0	6.572e-05	32.8	0.218084	2	1988.04	1.85497	50.5174	0
	High	AIAELGIYPAVDPLDSTSr	3	2	1	H0YH81	R19(Arg10)	0	361832	1.33071	2	21.1412	0	0.0001064	27.07	0.808512	2	1998.04	-0.460024	50.9082	0
	High	IPSAVGYQPTLATDmGTmQER	2	2	1	H0YH81	M15(Oxidation); M18(Oxidation)	0	629348	2.164	2	30.0692	0	9.019e-05	26.98	1.28647	2	2298.08	4.60953	36.1834	0
	High	ImDPNIVGSEHYDVAr	3	2	1	H0YH81	M2(Oxidation); R16(Arg10)	0	518687	1.21708	3	1.88964	0.001	0.002153	29.51	0.485892	3	1841.87	0.0214545	33.3868	0
	High	ImNVIGEPIDER	2	2	1	H0YH81	M2(Oxidation)	0	742191	1.7706	2	13.0102	0.004	0.02065	22.26	1.64976	2	1401.7	-0.0392868	34.4916	0
Q00839-2	Isoform Short of Heterogeneous nuclear ribonucleoprotein U OS=Homo sapiens GN=HNRNPU - [HNRPU_HUMAN]	156.866	3.35	2	2	2	8	805779	1.26096	4	7.44671	806	88.9242	5.78271
	A2	Sequence	# PSMs	# Proteins	# Protein Groups	Protein Group Accessions	Modifications	ΔCn	Area	Light/Heavy	Light/Heavy Count	Light/Heavy Variability [%]	q-Value	PEP	IonScore	Exp Value	Charge	MH+ [Da]	ΔM [ppm]	RT [min]	# Missed Cleavages
	High	NFILDQTNVSAAAQR	3	2	1	Q00839-2		0	1.48682e+06	1.28732	2	7.59331	0	1.698e-05	61.61	0.000243931	2	1647.85	2.68928	38.5292	0
	High	NFILDQTNVSAAAQr	4	2	1	Q00839-2	R15(Arg10)	0	1.05819e+06	1.17588	1		0	2.483e-06	56.35	0.000813869	2	1657.86	1.58775	38.9932	0
	High	YNILGTNTImDk	1	2	1	Q00839-2	M10(Oxidation); K12(Lys8)	0	124742	1.29996	1		0.008	0.06255	11.1	21.3895	2	1406.71	0.847747	36.9243	0
P16401	Histone H1.5 OS=Homo sapiens GN=HIST1H1B PE=1 SV=3 - [H15_HUMAN]	154.777	19.47	1	4	4	17	4.28019e+06	1.21198	12	18.4784	226	22.5665	10.9165
	A2	Sequence	# PSMs	# Proteins	# Protein Groups	Protein Group Accessions	Modifications	ΔCn	Area	Light/Heavy	Light/Heavy Count	Light/Heavy Variability [%]	q-Value	PEP	IonScore	Exp Value	Charge	MH+ [Da]	ΔM [ppm]	RT [min]	# Missed Cleavages
	High	ALAAGGYDVEK	3	1	1	P16401		0	4.47822e+06	1.10342	3	2.31865	0	0.0008669	44.62	0.00512366	2	1093.55	0.0608413	26.5426	0
	High	ATGPPVSELITK	3	1	1	P16401		0	5.90867e+06	1.349	2	4.53779	0	0.0003404	42.87	0.00909409	2	1212.68	0.526378	35.6385	0
	High	ATGPPVSELITk	3	1	1	P16401	K12(Lys8)	0	4.10475e+06	1.34051	1		0	0.0011	36.52	0.0362344	2	1220.7	0.891102	35.5711	0
	High	kATGPPVSELITk	2	1	1	P16401	K1(Lys8); K13(Lys8)	0	1.80965e+06	1.51297	1		0.001	0.004193	38.55	0.0148225	2	1356.81	0.233788	32.2843	1
	High	ALAAGGYDVEk	1	1	1	P16401	K11(Lys8)	0	3.39734e+06				0.001	0.002215	28.58	0.238175	2	1101.57	0.579212	26.1728	0
	High	KATGPPVSELITK	2	1	1	P16401		0	2453677	1.37066	2	4.63738	0.002	0.01349	22.82	0.723519	2	1340.78	-0.160697	32.0695	1
	High	SETAPAETATPAPVEKsPAK	2	1	1	P16401	S17(Phospho)	0	2.04061e+06	0.96839	2	0.823549	0.002	0.005269	17.16	9.69334	2	2061.97	0.382553	24.138	1
	High	SETAPAETATPAPVEksPAk	1	1	1	P16401	K16(Lys8); S17(Phospho); K20(Lys8)	0	1.84643e+06	0.994365	1		0.008	0.04685	12.58	28.6363	2	2078.01	2.457	23.6791	1
A0A087WVQ9	Elongation factor 1-alpha 1 OS=Homo sapiens GN=EEF1A1 PE=4 SV=1 - [A0A087WVQ9_HUMAN]	145.463	4.31	5	2	2	6	2.42356e+06	1.61508	4	7.90892	441	47.8529	9.02686
	A2	Sequence	# PSMs	# Proteins	# Protein Groups	Protein Group Accessions	Modifications	ΔCn	Area	Light/Heavy	Light/Heavy Count	Light/Heavy Variability [%]	q-Value	PEP	IonScore	Exp Value	Charge	MH+ [Da]	ΔM [ppm]	RT [min]	# Missed Cleavages
	High	IGGIGTVPVGr	3	5	1	A0A087WVQ9	R11(Arg10)	0	1.70194e+06	1.57623	3	7.22948	0	3.143e-05	63.11	4.45162e-05	2	1035.62	-0.435208	32.3342	0
	High	IGGIGTVPVGR	2	5	1	A0A087WVQ9		0	2.81652e+06				0	0.001206	44.19	0.0041117	2	1025.61	0.00564633	32.2672	0
	High	LPLQDVYK	1	5	1	A0A087WVQ9		0	2.0306e+06	1.7534	1		0.002	0.00856	45.51	0.0040632	2	975.551	0.396561	33.9537	0
E9PK09	Bcl-2-associated transcription factor 1 (Fragment) OS=Homo sapiens GN=BCLAF1 PE=1 SV=4 - [E9PK09_HUMAN]	139.333	4.55	7	3	3	11	4.02175e+06	0.898428	7	6.7089	725	83.0857	10.1401
	A2	Sequence	# PSMs	# Proteins	# Protein Groups	Protein Group Accessions	Modifications	ΔCn	Area	Light/Heavy	Light/Heavy Count	Light/Heavy Variability [%]	q-Value	PEP	IonScore	Exp Value	Charge	MH+ [Da]	ΔM [ppm]	RT [min]	# Missed Cleavages
	High	FNDsEGDDTEETEDYR	3	7	1	E9PK09	S4(Phospho)	0	2.61481e+06	0.891032	2	1.22555	0	7.739e-06	59.53	8.9645e-05	2	2001.69	1.17718	27.6543	0
	High	FNDsEGDDTEETEDYr	3	7	1	E9PK09	S4(Phospho); R16(Arg10)	0	3.1132e+06	0.858723	1		0	2.216e-07	52.74	0.000436063	2	2011.7	1.12644	28.141	0
	High	YsPSQNsPIHHIPSr	1	7	1	E9PK09	S2(Phospho); S7(Phospho); R15(Arg10)	0	6.91003e+06	1.1977	1		0	0.0004706	26.3	0.702565	3	1889.8	0.764527	27.8067	0
	High	YsPSQNsPIHHIPSR	3	7	1	E9PK09	S2(Phospho); S7(Phospho)	0	8.27617e+06	1.24027	2	6.61545	0.001	0.00202	25.58	0.782214	3	1879.79	0.914036	27.7524	0
	High	QkFNDsEGDDTEETEDYr	1	7	1	E9PK09	K2(Lys8); S6(Phospho); R18(Arg10)	0	675857	0.868461	1		0.008	0.06203	28.78	0.275993	2	2275.87	1.19952	25.5207	1
P07437	Tubulin beta chain OS=Homo sapiens GN=TUBB PE=1 SV=2 - [TBB5_HUMAN]	133.05	17.57	1	6	6	16	2.01983e+06	1.42127	11	14.3734	444	49.639	4.89404
	A2	Sequence	# PSMs	# Proteins	# Protein Groups	Protein Group Accessions	Modifications	ΔCn	Area	Light/Heavy	Light/Heavy Count	Light/Heavy Variability [%]	q-Value	PEP	IonScore	Exp Value	Charge	MH+ [Da]	ΔM [ppm]	RT [min]	# Missed Cleavages
	High	EIVHIQAGQcGNQIGAK	4	1	1	P07437	C10(Carbamidomethyl)	0	2.02295e+06	1.29059	3	1.34001	0	7.925e-07	40.42	0.0401211	3	1822.92	0.513997	29.5255	0
	High	LAVNmVPFPR	2	1	1	P07437	M5(Oxidation)	0	1.27465e+06	1.6288	2	6.77271	0	0.001495	37.28	0.0356458	2	1159.63	0.125756	39.5668	0
	High	ISVYYNEATGGk	2	1	1	P07437	K12(Lys8)	0	946555	1.36445	2	6.05456	0.001	0.002287	55.47	0.000703662	2	1309.65	0.44656	29.7427	0
	High	ISVYYNEATGGK	3	1	1	P07437		0	1.46548e+06	1.41275	1		0.001	0.00262	25.22	0.704173	2	1301.64	0.854279	29.7309	0
	High	AILVDLEPGTmDSVr	2	1	1	P07437	M11(Oxidation); R15(Arg10)	0	839826	2.61044	2	5.78106	0.001	0.002423	22.35	1.97682	2	1641.84	0.23261	41.2974	0
	High	ImNTFSVVPSPK	1	1	1	P07437	M2(Oxidation)	0	0				0.001	0.002785	17.7	3.94927	2	1335.7	-1.52729	36.0885	0
	High	EVDEQmLNVQNK	1	1	1	P07437	M6(Oxidation)	0	832141	1.69266	1		0.001	0.002516	11.37	19.6297	2	1462.69	0.546866	24.563	0
	High	AILVDLEPGTmDSVR	1	1	1	P07437	M11(Oxidation)	0	2.57107e+06				0.004	0.0232	14.49	12.0381	2	1631.83	1.41145	41.8181	0
Q9H6F5	Coiled-coil domain-containing protein 86 OS=Homo sapiens GN=CCDC86 PE=1 SV=1 - [CCD86_HUMAN]	129.69	12.78	1	2	2	15	8.32797e+06	1.02064	8	4.15076	360	40.2113	10.3306
	A2	Sequence	# PSMs	# Proteins	# Protein Groups	Protein Group Accessions	Modifications	ΔCn	Area	Light/Heavy	Light/Heavy Count	Light/Heavy Variability [%]	q-Value	PEP	IonScore	Exp Value	Charge	MH+ [Da]	ΔM [ppm]	RT [min]	# Missed Cleavages
	High	LQQGAGLESPQGQPEPGAAsPQR	6	1	1	Q9H6F5	S20(Phospho)	0	1.48693e+07	1.03083	4	3.66371	0	8.484e-08	63.54	0.00030782	2	2383.11	1.90245	28.2731	0
	High	LQQGAGLESPQGQPEPGAAsPQr	7	1	1	Q9H6F5	S20(Phospho); R23(Arg10)	0	1.38606e+07	1.04974	2	2.03661	0	0.000672	30.89	0.586465	2	2393.12	2.21382	28.2419	0
	High	ALVEFESNPEETrEPGsPPSVQr	2	1	1	Q9H6F5	R13(Arg10); S17(Phospho); R23(Arg10)	0	1.78662e+06	0.881438	2	18.6786	0.001	0.002164	12.9	39.1544	3	2655.22	1.24833	37.3829	1
Q9NTI5-2	Isoform 2 of Sister chromatid cohesion protein PDS5 homolog B OS=Homo sapiens GN=PDS5B - [PDS5B_HUMAN]	108.784	2.52	2	2	2	12	1.42472e+06	1.56502	6	14.7747	1391	158.18	8.5874
	A2	Sequence	# PSMs	# Proteins	# Protein Groups	Protein Group Accessions	Modifications	ΔCn	Area	Light/Heavy	Light/Heavy Count	Light/Heavy Variability [%]	q-Value	PEP	IonScore	Exp Value	Charge	MH+ [Da]	ΔM [ppm]	RT [min]	# Missed Cleavages
	High	AEsPESSAIESTQSTPQk	3	2	1	Q9NTI5-2	S3(Phospho); K18(Lys8)	0	1.06075e+06	1.53517	1		0	1.024e-05	43.29	0.0172781	2	1964.86	0.772146	26.2124	0
	High	AEsPESSAIESTQSTPQK	3	2	1	Q9NTI5-2	S3(Phospho)	0	1769721	1.65808	2	5.71407	0	3.72e-05	38.06	0.0527953	2	1956.85	1.85564	26.7785	0
	High	AEsPESSAIESTQStPQK	2	2	1	Q9NTI5-2	S3(Phospho); T15(Phospho)	0	930254	1.26321	2	9.55661	0	5.175e-05	28.13	0.337625	2	2036.81	0.513211	26.1562	0
	High	AEsPESSAIESTQStPQk	3	2	1	Q9NTI5-2	S3(Phospho); T15(Phospho); K18(Lys8)	0	728875				0.001	0.002524	17.53	4.69236	2	2044.83	2.5816	26.1629	0
	High	LKEDILENEDEQNsPPK	1	2	1	Q9NTI5-2	S14(Phospho)	0	1.07971e+06	1.733	1		0.004	0.01717	17.17	8.8182	2	2077.94	1.42554	31.8101	1
E7EUT5	Glyceraldehyde-3-phosphate dehydrogenase OS=Homo sapiens GN=GAPDH PE=1 SV=1 - [E7EUT5_HUMAN]	107.649	11.92	3	2	2	7	721526	1.31471	5	21.4363	260	27.8531	6.94678
	A2	Sequence	# PSMs	# Proteins	# Protein Groups	Protein Group Accessions	Modifications	ΔCn	Area	Light/Heavy	Light/Heavy Count	Light/Heavy Variability [%]	q-Value	PEP	IonScore	Exp Value	Charge	MH+ [Da]	ΔM [ppm]	RT [min]	# Missed Cleavages
	High	VPTANVSVVDLTcR	3	3	1	E7EUT5	C13(Carbamidomethyl)	0	945707	1.41405	2	10.8314	0	0.0001493	44.39	0.0117144	2	1530.8	1.88502	38.9609	0
	High	VPTANVSVVDLTcr	2	3	1	E7EUT5	C13(Carbamidomethyl); R14(Arg10)	0	719327	1.13957	1		0	8.178e-06	36.73	0.0685702	2	1540.8	-0.087225	39.4146	0
	High	IISNAScTTNcLAPLAK	1	3	1	E7EUT5	C7(Carbamidomethyl); C11(Carbamidomethyl)	0	497346	1.43429	1		0	0.0006875	19.34	5.12332	2	1833.92	1.7514	35.9095	0
	High	IISNAScTTNcLAPLAk	1	3	1	E7EUT5	C7(Carbamidomethyl); C11(Carbamidomethyl); K17(Lys8)	0	350974	1.00127	1		0.004	0.02335	15.79	11.2532	2	1841.94	1.72269	35.3311	0
Q9HB58-2	Isoform 2 of Sp110 nuclear body protein OS=Homo sapiens GN=SP110 - [SP110_HUMAN]	99.77	5.64	7	2	2	9	2.97673e+06	1.5478	6	4.54085	408	46.2551	9.45166
	A2	Sequence	# PSMs	# Proteins	# Protein Groups	Protein Group Accessions	Modifications	ΔCn	Area	Light/Heavy	Light/Heavy Count	Light/Heavy Variability [%]	q-Value	PEP	IonScore	Exp Value	Charge	MH+ [Da]	ΔM [ppm]	RT [min]	# Missed Cleavages
	High	DNsPEPNDPEEPQEVSSTPSDK	5	7	1	Q9HB58-2	S3(Phospho)	0	2.43208e+06	1.52456	4	7.50068	0	2.122e-09	67.51	6.16886e-05	2	2477.99	0.909094	26.3549	0
	High	DNsPEPNDPEEPQEVSSTPSDk	2	7	1	Q9HB58-2	S3(Phospho); K22(Lys8)	0	1.16324e+06				0	7.365e-05	26.28	0.906929	2	2486	0.399507	26.5345	0
	High	DNsPEPNDPEEPQEVSSTPSDKK	2	7	1	Q9HB58-2	S3(Phospho)	0	3.52139e+06	1.54914	2	2.29597	0.002	0.007845	12.63	29.0316	3	2606.08	1.74949	24.0968	1
Q5JTV8-2	Isoform 2 of Torsin-1A-interacting protein 1 OS=Homo sapiens GN=TOR1AIP1 - [TOIP1_HUMAN]	88.7329	17.41	6	3	3	19	1.83045e+06	1.34849	14	35.4648	379	43.0636	7.1958
	A2	Sequence	# PSMs	# Proteins	# Protein Groups	Protein Group Accessions	Modifications	ΔCn	Area	Light/Heavy	Light/Heavy Count	Light/Heavy Variability [%]	q-Value	PEP	IonScore	Exp Value	Charge	MH+ [Da]	ΔM [ppm]	RT [min]	# Missed Cleavages
	High	DsHsSEEDEASSQTDLSQTISk	5	6	1	Q5JTV8-2	S2(Phospho); S4(Phospho); K22(Lys8)	0	1.91313e+06	1.01262	2	2.22104	0	0.0001355	35.24	0.0843968	2	2548.98	2.99412	31.6116	0
	High	DsHsSEEDEASSQTDLSQTISK	4	6	1	Q5JTV8-2	S2(Phospho); S4(Phospho)	0	1.83978e+06	0.958535	3	6.2736	0	3.187e-05	31.91	0.160302	3	2540.96	1.98068	32.0087	0
	High	DSHSSEEDEASsQTDLSQTISK	3	6	1	Q5JTV8-2	S12(Phospho)	0	1.29531e+06	1.4855	2	5.6485	0	0.00108	19.58	4.16327	2	2460.99	0.249132	30.6099	0
	High	VNFSEEGEtEEDDQDSSHSSVTTVk	1	5	1	Q5JTV8-2	T9(Phospho); K25(Lys8)	0	1.08558e+06	0.582713	1		0	0.001304	11	38.2191	3	2844.15	1.59433	30.4191	0
	High	LQQQHSEQPPLQPsPVmTR	1	6	1	Q5JTV8-2	S14(Phospho); M17(Oxidation)	0	2.49263e+06	1.40731	1		0.001	0.002326	16.07	15.6052	3	2297.08	1.54099	27.3797	0
	High	DSHSsEEDEASSQTDLSQTISk	4	6	1	Q5JTV8-2	S5(Phospho); K22(Lys8)	0	609947	1.45037	4	10.8299	0.001	0.002428	14.03	15.8127	2	2469.01	1.02365	30.2577	0
	High	VNFsEEGEtEEDDQDSSHSSVTTVk	1	5	1	Q5JTV8-2	S4(Phospho); T9(Phospho); K25(Lys8)	0	22967	3.47253	1		0.004	0.02477	10.84	28.5976	3	2924.12	2.37799	30.6024	0
P08238	Heat shock protein HSP 90-beta OS=Homo sapiens GN=HSP90AB1 PE=1 SV=4 - [HS90B_HUMAN]	87.7814	7.32	1	3	4	10	920904	1.47212	6	12.8646	724	83.2121	5.03369
	A2	Sequence	# PSMs	# Proteins	# Protein Groups	Protein Group Accessions	Modifications	ΔCn	Area	Light/Heavy	Light/Heavy Count	Light/Heavy Variability [%]	q-Value	PEP	IonScore	Exp Value	Charge	MH+ [Da]	ΔM [ppm]	RT [min]	# Missed Cleavages
	High	NPDDITQEEYGEFYK	4	1	1	P08238		0	739759	1.47212	2	7.92654	0	1.034e-05	37.98	0.0506482	2	1847.8	1.70321	38.601	0
	High	NPDDITQEEYGEFYk	3	1	1	P08238	K15(Lys8)	0	406525	1.62478	1		0	0.0001019	37.47	0.0607105	2	1855.81	1.93804	39.193	0
	High	ADLINNLGTIAk	1	3	2	P07900;P08238	K12(Lys8)	0	465381	1.94392	1		0.001	0.004894	27.09	0.298721	2	1250.72	-0.749043	41.1903	0
	High	ELISNASDALDK	1	1	1	P08238		0	371868	0.52116	1		0.001	0.004776	18.78	3.23603	2	1275.64	0.954183	33.0307	0
	High	IEDVGsDEEDDSGk	1	1	1	P08238	S6(Phospho); K14(Lys8)	0	1.55757e+06	1.36689	1		0.002	0.01136	11.51	7.43046	2	1582.59	0.614036	21.2411	0
A0A087WY61	Nuclear mitotic apparatus protein 1 OS=Homo sapiens GN=NUMA1 PE=1 SV=1 - [A0A087WY61_HUMAN]	75.755	1.81	3	2	2	9	2.58787e+06	1.63164	4	2.44597	2099	236.019	5.92236
	A2	Sequence	# PSMs	# Proteins	# Protein Groups	Protein Group Accessions	Modifications	ΔCn	Area	Light/Heavy	Light/Heavy Count	Light/Heavy Variability [%]	q-Value	PEP	IonScore	Exp Value	Charge	MH+ [Da]	ΔM [ppm]	RT [min]	# Missed Cleavages
	High	TQPDGTSVPGEPAsPISQR	4	3	1	A0A087WY61	S14(Phospho)	0	4.92006e+06	1.64017	3	1.54649	0	9.171e-06	46.15	0.0111733	2	2003.91	2.16689	29.6767	0
	High	QAQLAQTLQQQEQASQGLr	1	3	1	A0A087WY61	R19(Arg10)	0	255686				0	0.001313	15.23	13.8651	2	2136.11	1.87492	37.2187	0
	High	TQPDGTSVPGEPAsPISQr	3	3	1	A0A087WY61	S14(Phospho); R19(Arg10)	0	2.93281e+06				0.001	0.003428	24.08	1.74413	2	2013.92	1.74761	29.7089	0
	High	QAQLAQTLQQQEQASQGLR	1	3	1	A0A087WY61		0	220650	0.862973	1		0.002	0.009031	18.2	7.32412	2	2126.1	0.835327	37.1882	0
P55081	Microfibrillar-associated protein 1 OS=Homo sapiens GN=MFAP1 PE=1 SV=2 - [MFAP1_HUMAN]	57.1967	9.79	1	2	2	9	1.56205e+06	1.32374	4	13.511	439	51.9266	4.98291
	A2	Sequence	# PSMs	# Proteins	# Protein Groups	Protein Group Accessions	Modifications	ΔCn	Area	Light/Heavy	Light/Heavy Count	Light/Heavy Variability [%]	q-Value	PEP	IonScore	Exp Value	Charge	MH+ [Da]	ΔM [ppm]	RT [min]	# Missed Cleavages
	High	IVEPEVVGEsDsEVEGDAWr	3	1	1	P55081	S10(Phospho); S12(Phospho); R20(Arg10)	0	2.12016e+06	1.32374	2	7.71625	0	7.864e-05	37.66	0.0637335	2	2371.97	1.84791	45.0818	0
	High	IVEPEVVGEsDsEVEGDAWR	3	1	1	P55081	S10(Phospho); S12(Phospho)	0	2.8812e+06				0	0.0003017	30.51	0.324069	2	2361.96	2.46247	44.9476	0
	High	SLAALDALNtDDENDEEEYEAWK	2	1	1	P55081	T10(Phospho)	0	242912	1.26333	2	26.5712	0.001	0.005102	18.49	6.39797	2	2721.11	-0.863395	50.5066	0
	High	SLAALDALNtDDENDEEEYEAWk	1	1	1	P55081	T10(Phospho); K23(Lys8)	0	190171				0.002	0.006759	15.44	14.2422	2	2729.12	-1.14347	50.4924	0
E9PLF4	Heat shock cognate 71 kDa protein (Fragment) OS=Homo sapiens GN=HSPA8 PE=1 SV=1 - [E9PLF4_HUMAN]	53.97	23.53	10	3	3	11	497247	1.84381	6	14.6894	187	20.3563	7.32764
	A2	Sequence	# PSMs	# Proteins	# Protein Groups	Protein Group Accessions	Modifications	ΔCn	Area	Light/Heavy	Light/Heavy Count	Light/Heavy Variability [%]	q-Value	PEP	IonScore	Exp Value	Charge	MH+ [Da]	ΔM [ppm]	RT [min]	# Missed Cleavages
	High	TTPSYVAFTDTEr	1	10	1	E9PLF4	R13(Arg10)	0	265538	1.61402	1		0	0.000594	32.6	0.164065	2	1497.71	1.42699	35.7392	0
	High	NQVAmNPTNTVFDAK	4	10	1	E9PLF4	M5(Oxidation)	0	641954	1.52508	2	22.7693	0	0.0008635	26.83	0.729851	2	1665.79	0.825556	31.9498	0
	High	IINEPTAAAIAYGLDK	2	4	1	E9PLF4		0	310558	2.67257	1		0.001	0.002547	19.85	3.07075	2	1659.9	1.11514	45.0048	0
	High	NQVAmNPTNTVFDAk	2	10	1	E9PLF4	M5(Oxidation); K15(Lys8)	0	473757	1.91552	1		0.002	0.01169	17.97	5.92789	2	1673.81	0.579608	31.6028	0
	High	TTPSYVAFTDTER	2	10	1	E9PLF4		0	539229	1.96567	1		0.004	0.02231	27.1	0.55863	2	1487.7	0.0203294	35.3064	0
Q03252	Lamin-B2 OS=Homo sapiens GN=LMNB2 PE=1 SV=3 - [LMNB2_HUMAN]	53.91	5.83	2	2	3	5	2.81188e+06	1.05551	4	21.7207	600	67.6475	5.35107
	A2	Sequence	# PSMs	# Proteins	# Protein Groups	Protein Group Accessions	Modifications	ΔCn	Area	Light/Heavy	Light/Heavy Count	Light/Heavy Variability [%]	q-Value	PEP	IonScore	Exp Value	Charge	MH+ [Da]	ΔM [ppm]	RT [min]	# Missed Cleavages
	High	NNSDKDQSLGNWR	1	2	1	Q03252		0	3.7195e+06	0.958673	1		0.001	0.002025	43.05	0.0139667	2	1533.71	0.6549	25.5712	1
	High	ATSSsSGSLSATGr	1	2	1	Q03252	S5(Phospho); R14(Arg10)	0	964560	0.847351	1		0.001	0.002288	18.77	2.00503	2	1358.58	0.428418	17.5476	0
	High	NNSDkDQSLGNWr	2	2	1	Q03252	K5(Lys8); R13(Arg10)	0	3.9315e+06	1.16213	1		0.002	0.01638	24.73	0.920864	3	1551.73	0.201407	25.5771	1
	High	LLEGEEEr	1	3	2	P20700;Q03252	R8(Arg10)	0	3.53958e+06	1.28073	1		0.008	0.06144	23.42	0.582612	2	984.487	-0.134237	20.206	0
Q96JM3	Chromosome alignment-maintaining phosphoprotein 1 OS=Homo sapiens GN=CHAMP1 PE=1 SV=2 - [CHAP1_HUMAN]	53.39	7.14	1	3	3	15	1.4458e+06	1.65662	11	46.4917	812	89.0429	8.44092
	A2	Sequence	# PSMs	# Proteins	# Protein Groups	Protein Group Accessions	Modifications	ΔCn	Area	Light/Heavy	Light/Heavy Count	Light/Heavy Variability [%]	q-Value	PEP	IonScore	Exp Value	Charge	MH+ [Da]	ΔM [ppm]	RT [min]	# Missed Cleavages
	High	GQESssDQEQVDVESIDFSK	4	1	1	Q96JM3	S5(Phospho); S6(Phospho)	0	820581	1.22925	3	9.87856	0	0.001164	29.72	0.266809	2	2373.91	4.16142	41.4804	0
	High	LAPVPsPEPQkPAPVsPESVk	4	1	1	Q96JM3	S6(Phospho); K11(Lys8); S16(Phospho); K21(Lys8)	0	2.9233e+06	1.71865	3	5.45454	0	0.0005703	22.26	3.77494	3	2330.14	0.508603	34.7268	0
	High	DNQESsDAELSSSEYIk	3	1	1	Q96JM3	S6(Phospho); K17(Lys8)	0	593520	1.03839	2	10.5137	0	0.0005433	19.95	2.65438	2	1989.81	2.17941	33.93	0
	High	GQESSsDQEQVDVESIDFSK	2	1	1	Q96JM3	S6(Phospho)	0	649595	7.68032	2	404.421	0.001	0.002556	34.7	0.126423	2	2293.94	4.31625	39.9809	0
	High	GQESssDQEQVDVESIDFSk	1	1	1	Q96JM3	S5(Phospho); S6(Phospho); K20(Lys8)	0	516554				0.001	0.002048	11.49	19.4318	2	2381.92	3.00364	41.9616	0
	High	LAPVPsPEPQKPAPVsPESVK	1	1	1	Q96JM3	S6(Phospho); S16(Phospho)	0	2.28171e+06	1.97289	1		0.002	0.008342	19.68	6.8264	2	2314.11	0.340506	34.6144	0
Q8WWQ0	PH-interacting protein OS=Homo sapiens GN=PHIP PE=1 SV=2 - [PHIP_HUMAN]	51.24	1.87	1	2	2	7	1.52373e+06	1.20075	4	8.59434	1821	206.56	8.85107
	A2	Sequence	# PSMs	# Proteins	# Protein Groups	Protein Group Accessions	Modifications	ΔCn	Area	Light/Heavy	Light/Heavy Count	Light/Heavy Variability [%]	q-Value	PEP	IonScore	Exp Value	Charge	MH+ [Da]	ΔM [ppm]	RT [min]	# Missed Cleavages
	High	TAFYNEDDsEEEQr	1	1	1	Q8WWQ0	S9(Phospho); R14(Arg10)	0	1.64507e+06	0.958716	1		0	0.0002744	26.73	0.212218	2	1822.67	1.2467	28.282	0
	High	TAFYNEDDsEEEQR	3	1	1	Q8WWQ0	S9(Phospho)	0	1.4759e+06	1.14798	1		0	0.0009635	26.32	0.225529	2	1812.66	0.764644	27.77	0
	High	VLsDsEDEEkDADVPGTSTr	1	1	1	Q8WWQ0	S3(Phospho); S5(Phospho); K10(Lys8); R20(Arg10)	0	1.09392e+06	1.28882	1		0.001	0.002123	39.92	0.0334098	2	2327.93	1.63029	30.7091	1
	High	VLsDsEDEEKDADVPGTSTR	2	1	1	Q8WWQ0	S3(Phospho); S5(Phospho)	0	1.40239e+06	1.25595	1		0.004	0.01977	20.62	2.2424	2	2309.9	-0.573481	30.6916	1
P52948-4	Isoform 4 of Nuclear pore complex protein Nup98-Nup96 OS=Homo sapiens GN=NUP98 - [NUP98_HUMAN]	50.2314	5	6	3	3	10	2.14874e+06	1.12246	6	12.0527	920	96.016	7.63525
	A2	Sequence	# PSMs	# Proteins	# Protein Groups	Protein Group Accessions	Modifications	ΔCn	Area	Light/Heavy	Light/Heavy Count	Light/Heavy Variability [%]	q-Value	PEP	IonScore	Exp Value	Charge	MH+ [Da]	ΔM [ppm]	RT [min]	# Missed Cleavages
	High	YGLQDsDEEEEEHPSK	1	6	1	P52948-4	S6(Phospho)	0	3679649	1.22586	1		0	0.0004804	38.64	0.0224102	2	1971.75	1.09957	25.0785	0
	High	YGLQDsDEEEEEHPSk	2	6	1	P52948-4	S6(Phospho); K16(Lys8)	0	3.0017e+06	1.20852	1		0	0.000183	24.5	0.67042	2	1979.77	2.18535	24.7611	0
	High	DSENLAsPSEYPENGER	3	6	1	P52948-4	S7(Phospho)	0	715704	0.640047	2	6.84114	0	0.001653	18.91	2.70232	2	1973.78	2.37971	30.5004	0
	High	NLNNsNLFSPVNR	1	6	1	P52948-4	S5(Phospho)	0	1.86635e+06	1.08395	1		0.001	0.002134	27.5	0.519169	2	1568.72	0.840021	39.7844	0
	High	DSENLAsPSEYPENGEr	2	6	1	P52948-4	S7(Phospho); R17(Arg10)	0	900230	1.16233	1		0.001	0.004063	14.15	8.47063	2	1983.78	0.106966	30.013	0
	High	NLNNsNLFSPVNr	1	6	1	P52948-4	S5(Phospho); R13(Arg10)	0	1.7218e+06				0.002	0.006656	18.28	4.40877	2	1578.73	0.15893	39.7903	0
Q92728	Mutated retinoblastoma protein OS=Homo sapiens GN=RB1 PE=1 SV=1 - [Q92728_HUMAN]	49.03	73.58	2	2	2	5	3.63465e+06	3.53009	3	1.67141	53	5.38871	4.64014
	A2	Sequence	# PSMs	# Proteins	# Protein Groups	Protein Group Accessions	Modifications	ΔCn	Area	Light/Heavy	Light/Heavy Count	Light/Heavy Variability [%]	q-Value	PEP	IonScore	Exp Value	Charge	MH+ [Da]	ΔM [ppm]	RT [min]	# Missed Cleavages
	High	KTAATAAAAAAEPPAPPPPPPPEEDPEQDsGPEDLPLVR	4	2	1	Q92728	S30(Phospho)	0	4.89729e+06	3.51025	2	0.83566	0	1.568e-06	50.6	0.0104755	3	3976.89	0.86923	42.9812	1
	High	TAATAAAAAAEPPAPPPPPPPEEDPEQDsGPEDLPLVR	1	2	1	Q92728	S29(Phospho)	0	2.37201e+06	37.2582	1		0	3.779e-05	15.86	33.998	5	3848.79	0.938565	46.0407	0
Q96PK6	RNA-binding protein 14 OS=Homo sapiens GN=RBM14 PE=1 SV=2 - [RBM14_HUMAN]	48.4	7.77	1	2	2	6	5.26839e+06	1.92705	5	2.40459	669	69.4489	9.67139
	A2	Sequence	# PSMs	# Proteins	# Protein Groups	Protein Group Accessions	Modifications	ΔCn	Area	Light/Heavy	Light/Heavy Count	Light/Heavy Variability [%]	q-Value	PEP	IonScore	Exp Value	Charge	MH+ [Da]	ΔM [ppm]	RT [min]	# Missed Cleavages
	High	GQPGNAYDGAGQPSAAYLSmSQGAVANANStPPPYEr	1	1	1	Q96PK6	M20(Oxidation); T31(Phospho); R37(Arg10)	0	1.58421e+06	1.95856	1		0	9e-08	44.78	0.0388413	3	3800.65	-1.32459	39.2607	0
	High	GQPGNAYDGAGQPSAAYLSmSQGAVANANStPPPYER	4	1	1	Q96PK6	M20(Oxidation); T31(Phospho)	0	1.03498e+07	1.92705	3	1.27587	0	3.595e-06	27.62	2.11193	3	3790.66	3.04313	39.6819	0
	High	ASYVAPLTAQPATYr	1	1	1	Q96PK6	R15(Arg10)	0	186956	0.802116	1		0.004	0.03135	15.75	8.93205	2	1618.85	1.06234	35.9924	0
F8VV57	Keratin, type II cytoskeletal 5 (Fragment) OS=Homo sapiens GN=KRT5 PE=1 SV=1 - [F8VV57_HUMAN]	47.03	18.94	2	2	2	4	871688	39.8653	4	13.0964	132	12.1498	12.0005
	A2	Sequence	# PSMs	# Proteins	# Protein Groups	Protein Group Accessions	Modifications	ΔCn	Area	Light/Heavy	Light/Heavy Count	Light/Heavy Variability [%]	q-Value	PEP	IonScore	Exp Value	Charge	MH+ [Da]	ΔM [ppm]	RT [min]	# Missed Cleavages
	High	ISISTSGGSFR	1	2	1	F8VV57		0	1.08405e+06	78.8778	1		0	0.001553	47.04	0.00350912	2	1111.57	-0.764181	31.5946	0
	High	SFSTASAITPSVSR	3	2	1	F8VV57		0	659324	38.5621	3	9.87926	0.001	0.002798	26.16	0.692535	2	1410.72	0.221552	32.967	0
Q9UKM9-2	Isoform 1 of RNA-binding protein Raly OS=Homo sapiens GN=RALY - [RALY_HUMAN]	42.98	11.03	2	2	2	5	3.29381e+06	1.35594	3	3.50034	290	30.3458	9.62744
	A2	Sequence	# PSMs	# Proteins	# Protein Groups	Protein Group Accessions	Modifications	ΔCn	Area	Light/Heavy	Light/Heavy Count	Light/Heavy Variability [%]	q-Value	PEP	IonScore	Exp Value	Charge	MH+ [Da]	ΔM [ppm]	RT [min]	# Missed Cleavages
	High	TrDDGDEEGLLTHsEEELEHSQDTDADDGALQ	3	2	1	Q9UKM9-2	R2(Arg10); S14(Phospho)	0	5.78197e+06	1.37204	2	1.74977	0	0.001573	26.45	1.73415	3	3617.46	1.68331	37.1311	1
	High	TRDDGDEEGLLTHSEEELEHSQDtDADDGALQ	1	2	1	Q9UKM9-2	T24(Phospho)	0	713243	1.28506	1		0.004	0.02477	30.63	0.594276	3	3607.44	-1.43396	42.2244	1
	High	DDGDEEGLLTHsEEELEHSQDTDADDGALQ	1	2	1	Q9UKM9-2	S12(Phospho)	0	805650				0.004	0.01975	15.07	15.7017	3	3350.3	1.36972	39.9567	0
Q9P1Y6-2	Isoform 2 of PHD and RING finger domain-containing protein 1 OS=Homo sapiens GN=PHRF1 - [PHRF1_HUMAN]	37.72	3.21	5	2	2	5	1.27637e+06	1.53846	4	31.841	1494	161.842	9.0708
	A2	Sequence	# PSMs	# Proteins	# Protein Groups	Protein Group Accessions	Modifications	ΔCn	Area	Light/Heavy	Light/Heavy Count	Light/Heavy Variability [%]	q-Value	PEP	IonScore	Exp Value	Charge	MH+ [Da]	ΔM [ppm]	RT [min]	# Missed Cleavages
	High	GAVAAEGASDtEREEPTESQGLAAR	1	5	1	Q9P1Y6-2	T11(Phospho)	0	1.19722e+06	1.12008	1		0	0.0003844	36.92	0.139491	3	2582.14	0.662082	28.993	1
	High	AEAPSsPDVAPAGKEDsPSASGR	2	5	1	Q9P1Y6-2	S6(Phospho); S17(Phospho)	0	1.35551e+06	1.8972	2	3.43125	0.002	0.005741	22.3	2.27853	3	2342.96	0.915299	23.7426	1
	High	GAVAAEGAsDTErEEPTESQGLAAr	2	5	1	Q9P1Y6-2	S9(Phospho); R13(Arg10); R25(Arg10)	0	1.18178e+06	1.27675	1		0.002	0.01678	15.41	20.0094	3	2602.16	1.36163	28.9805	1
O00567	Nucleolar protein 56 OS=Homo sapiens GN=NOP56 PE=1 SV=4 - [NOP56_HUMAN]	37.17	6.9	1	3	3	6	2.70949e+06	0.975416	5	6.43866	594	66.0087	9.18799
	A2	Sequence	# PSMs	# Proteins	# Protein Groups	Protein Group Accessions	Modifications	ΔCn	Area	Light/Heavy	Light/Heavy Count	Light/Heavy Variability [%]	q-Value	PEP	IonScore	Exp Value	Charge	MH+ [Da]	ΔM [ppm]	RT [min]	# Missed Cleavages
	High	EELmSsDLEETAGSTSIPK	1	1	1	O00567	M4(Oxidation); S6(Phospho)	0	1.51346e+06	0.934005	1		0	0.0008246	30.37	0.344329	2	2119.9	2.08057	37.5082	0
	High	EELmsSDLEETAGSTSIPk	3	1	1	O00567	M4(Oxidation); S5(Phospho); K19(Lys8)	0	1.81223e+06	1.05765	2	6.20496	0.001	0.002357	19.03	5.07918	2	2127.92	1.25136	37.692	0
	High	VVSLSEYr	1	1	1	O00567	R8(Arg10)	0	2.19482e+06	0.975416	1		0.002	0.008539	24.8	0.397854	2	962.518	0.31052	28.9785	0
	High	EEPVssGPEEAVGK	1	1	1	O00567	S5(Phospho); S6(Phospho)	0	4.12142e+06	0.781582	1		0.008	0.05772	12.74	5.84255	2	1574.6	1.22084	28.6306	0
Q9Y2X3	Nucleolar protein 58 OS=Homo sapiens GN=NOP58 PE=1 SV=1 - [NOP58_HUMAN]	33.73	4.35	1	2	2	8	2.36164e+06	1.03123	4	7.50927	529	59.5405	8.92432
	A2	Sequence	# PSMs	# Proteins	# Protein Groups	Protein Group Accessions	Modifications	ΔCn	Area	Light/Heavy	Light/Heavy Count	Light/Heavy Variability [%]	q-Value	PEP	IonScore	Exp Value	Charge	MH+ [Da]	ΔM [ppm]	RT [min]	# Missed Cleavages
	High	EEPLsEEEPcTSTAIAsPEk	4	1	1	Q9Y2X3	S5(Phospho); C10(Carbamidomethyl); S17(Phospho); K20(Lys8)	0	2.92615e+06	0.980402	3	0.00869826	0	9.436e-05	28.93	0.427633	2	2371.94	2.04575	36.3569	0
	High	EEPLsEEEPcTSTAIAsPEK	2	1	1	Q9Y2X3	S5(Phospho); C10(Carbamidomethyl); S17(Phospho)	0	2.8688e+06				0.001	0.004116	23.45	1.48254	2	2363.93	3.10188	36.0482	0
	High	HIkEEPLsEEEPcTSTAIAsPEk	2	1	1	Q9Y2X3	K3(Lys8); S8(Phospho); C13(Carbamidomethyl); S20(Phospho); K23(Lys8)	0	1.79714e+06	1.0847	1		0.002	0.01282	13.8	28.1241	3	2758.2	2.36936	33.2255	1
A2T926	Thymopentin OS=Homo sapiens GN=TMPO PE=1 SV=1 - [A2T926_HUMAN]	32.48	37.5	4	5	5	21	3.76364e+06	1.25318	14	30.4891	248	27.3714	8.48486
	A2	Sequence	# PSMs	# Proteins	# Protein Groups	Protein Group Accessions	Modifications	ΔCn	Area	Light/Heavy	Light/Heavy Count	Light/Heavy Variability [%]	q-Value	PEP	IonScore	Exp Value	Charge	MH+ [Da]	ΔM [ppm]	RT [min]	# Missed Cleavages
	High	GPPDFssDEEREPTPVLGSGAAAAGR	3	4	1	A2T926	S6(Phospho); S7(Phospho)	0	5.79536e+06	1.57693	2	45.9918	0	0.0002733	32.12	0.356933	3	2730.15	2.43757	39.4524	1
	High	SELVANNVTLPAGEQr	2	4	1	A2T926	R16(Arg10)	0	189059	1.23359	1		0	0.0001351	25.2	1.12146	2	1707.89	0.0128505	35.1191	0
	High	QNGSNDSDRYsDNEEDSKIELK	2	4	1	A2T926	S11(Phospho)	0	3.76346e+06	1.11239	2	1.57188	0.001	0.002567	23.25	2.35322	3	2623.08	1.23532	26.8994	2
	High	GPPDFSsDEEREPTPVLGSGAAAAGR	2	4	1	A2T926	S7(Phospho)	0	3.43254e+06	1.0561	2	47.8858	0.001	0.001801	22.4	4.18115	3	2650.18	0.976532	38.214	1
	High	GPPDFssDEErEPTPVLGSGAAAAGr	3	4	1	A2T926	S6(Phospho); S7(Phospho); R11(Arg10); R26(Arg10)	0	5.0091e+06	1.27307	1		0.001	0.002088	22.19	3.76864	3	2750.16	0.822835	40.1328	1
	High	SELVANNVTLPAGEQR	1	4	1	A2T926		0	261471	1.73684	1		0.001	0.003767	18.62	5.26602	2	1697.88	0.209895	34.6076	0
	High	YGVNPGPIVGTTR	1	4	1	A2T926		0	480030	0.914154	1		0.001	0.002978	18.6	3.36331	2	1330.71	0.765487	33.1933	0
	High	SstPLPTISSSAENTr	1	4	1	A2T926	S2(Phospho); T3(Phospho); R16(Arg10)	0	735510	2.27023	1		0.001	0.001888	18.55	3.49302	2	1817.76	1.96657	33.5278	0
	High	GPPDFsSDEErEPTPVLGSGAAAAGr	2	4	1	A2T926	S6(Phospho); R11(Arg10); R26(Arg10)	0	2.28505e+06	1.65297	1		0.001	0.002144	18.35	11.0029	3	2670.2	0.695863	37.7287	1
	High	SsTPLPTISSSAENTR	2	4	1	A2T926	S2(Phospho)	0	460929	1.39502	2	23.9964	0.002	0.01389	13.84	13.486	2	1727.78	-0.338592	31.6199	0
	High	ssTPLPTISSSAENTR	2	4	1	A2T926	S1(Phospho); S2(Phospho)	0	1.73209e+06				0.002	0.00629	11.64	16.5203	2	1807.75	1.41967	33.5418	0
P07900	Heat shock protein HSP 90-alpha OS=Homo sapiens GN=HSP90AA1 PE=1 SV=5 - [HS90A_HUMAN]	29.73	5.46	2	1	3	3	399662	3.88096	3	136.368	732	84.6067	5.021
	A2	Sequence	# PSMs	# Proteins	# Protein Groups	Protein Group Accessions	Modifications	ΔCn	Area	Light/Heavy	Light/Heavy Count	Light/Heavy Variability [%]	q-Value	PEP	IonScore	Exp Value	Charge	MH+ [Da]	ΔM [ppm]	RT [min]	# Missed Cleavages
	High	ADLINNLGTIAk	1	3	2	P07900;P08238	K12(Lys8)	0	465381	1.94392	1		0.001	0.004894	27.09	0.298721	2	1250.72	-0.749043	41.1903	0
	High	NPDDITNEEYGEFYK	1	2	1	P07900		0	303034	3.88096	1		0.001	0.002269	21.64	2.03453	2	1833.78	0.997623	38.6618	0
	High	TLTIVDTGIGmTK	1	2	2	P07900;P08238	M11(Oxidation)	0	430571	41.1155	1		0.008	0.04838	13.95	10.08	2	1365.73	0.679474	37.012	0
Q12906-4	Isoform 4 of Interleukin enhancer-binding factor 3 OS=Homo sapiens GN=ILF3 - [ILF3_HUMAN]	28.99	6.45	3	2	2	6	4.53507e+06	1.8457	5	4.06185	698	75.4608	8.41162
	A2	Sequence	# PSMs	# Proteins	# Protein Groups	Protein Group Accessions	Modifications	ΔCn	Area	Light/Heavy	Light/Heavy Count	Light/Heavy Variability [%]	q-Value	PEP	IonScore	Exp Value	Charge	MH+ [Da]	ΔM [ppm]	RT [min]	# Missed Cleavages
	High	GEDSAEEtEAKPAVVAPAPVVEAVSTPSAAFPSDATAENVK	1	3	1	Q12906-4	T8(Phospho)	0	2.53464e+06	1.62234	1		0	4.181e-06	26.59	2.82346	3	4118.95	4.03984	48.2583	0
	High	DSSKGEDsAEETEAKPAVVAPAPVVEAVSTPSAAFPSDATAENVK	2	3	1	Q12906-4	S8(Phospho)	0	6.5355e+06	2.43383	2	47.4588	0	1.237e-06	24.9	4.36868	4	4536.13	1.53811	46.7292	1
	High	GEDsAEETEAkPAVVAPAPVVEAVSTPSAAFPSDATAENVk	2	3	1	Q12906-4	S4(Phospho); K11(Lys8); K41(Lys8)	0	1.31322e+06	1.8457	1		0	6.292e-05	17.94	19.73	3	4134.98	3.73971	48.6936	0
	High	DSSkGEDSAEEtEAkPAVVAPAPVVEAVSTPSAAFPSDATAENVk	1	3	1	Q12906-4	K4(Lys8); T12(Phospho); K15(Lys8); K45(Lys8)	0	3.6381e+06	1.87997	1		0	0.001727	13.96	49.6292	4	4560.18	4.39546	46.6532	1
Q9UQ35-2	Isoform 2 of Serine/arginine repetitive matrix protein 2 OS=Homo sapiens GN=SRRM2 - [SRRM2_HUMAN]	28.71	3.08	4	3	3	8	2.64944e+06	2.23091	6	5.64125	2334	256.494	12.0151
	A2	Sequence	# PSMs	# Proteins	# Protein Groups	Protein Group Accessions	Modifications	ΔCn	Area	Light/Heavy	Light/Heavy Count	Light/Heavy Variability [%]	q-Value	PEP	IonScore	Exp Value	Charge	MH+ [Da]	ΔM [ppm]	RT [min]	# Missed Cleavages
	High	HGGsPQPLATTPLSQEPVNPPSEASPtr	2	4	1	Q9UQ35-2	S4(Phospho); T27(Phospho); R28(Arg10)	0	2.10848e+06	2.79815	1		0	2.309e-05	28.71	1.32372	3	3022.36	0.258974	39.1425	0
	High	HGGsPQPLATTPLSQEPVNPPSEASPtR	3	4	1	Q9UQ35-2	S4(Phospho); T27(Phospho)	0	6.24288e+06	2.23091	2	1.36941	0	0.0001775	21.05	7.37376	3	3012.35	-0.318042	38.449	0
	High	GEGDAPFSEPGTTSTQRPSsPETATK	2	4	1	Q9UQ35-2	S20(Phospho)	0	1.51087e+06	2.07149	2	17.1135	0	0.001451	17.97	10.7826	3	2715.18	1.77383	29.8848	0
	High	SStPPGESYFGVSSLQLK	1	2	1	Q9UQ35-2	T3(Phospho)	0	194578	2.15293	1		0.002	0.01016	12.84	23.7924	2	1963.91	1.44108	49.0215	0
Q9H307-2	Isoform 2 of Pinin OS=Homo sapiens GN=PNN - [PININ_HUMAN]	28.28	6.16	2	2	2	4	933995	1.84758	3	4.94472	584	66.9652	6.31592
	A2	Sequence	# PSMs	# Proteins	# Protein Groups	Protein Group Accessions	Modifications	ΔCn	Area	Light/Heavy	Light/Heavy Count	Light/Heavy Variability [%]	q-Value	PEP	IonScore	Exp Value	Charge	MH+ [Da]	ΔM [ppm]	RT [min]	# Missed Cleavages
	High	QQDsQPEEVmDVLEmVENVK	2	2	1	Q9H307-2	S4(Phospho); M10(Oxidation); M15(Oxidation)	0	427735	1.87862	2	2.47123	0.001	0.002315	27.68	0.905759	2	2459.04	1.76907	54.0803	0
	High	SLsPGkENVSALDmEk	1	2	1	Q9H307-2	S3(Phospho); K6(Lys8); M14(Oxidation); K16(Lys8)	0	1.21282e+06	1.08529	1		0.004	0.0271	20.4	3.67814	2	1816.84	0.440795	30.6391	1
	High	sLSPGKENVSALDmEK	1	2	1	Q9H307-2	S1(Phospho); M14(Oxidation)	0	1.44026e+06				0.004	0.02985	19.14	4.6023	2	1800.81	2.45366	30.6478	1
Q12906-5	Isoform 5 of Interleukin enhancer-binding factor 3 OS=Homo sapiens GN=ILF3 - [ILF3_HUMAN]	25.87	7.1	4	2	2	2	2.59504e+06	2.16444	1		690	74.5603	8.23584
	A2	Sequence	# PSMs	# Proteins	# Protein Groups	Protein Group Accessions	Modifications	ΔCn	Area	Light/Heavy	Light/Heavy Count	Light/Heavy Variability [%]	q-Value	PEP	IonScore	Exp Value	Charge	MH+ [Da]	ΔM [ppm]	RT [min]	# Missed Cleavages
	High	DSSKGEDSAEEtEAKPAVVAPAPVVEAVSTPSAAFPSDATAEQGPILTK	1	4	1	Q12906-5	T12(Phospho)	0	2.59504e+06	2.16444	1		0	0.0006533	25.87	3.19748	4	4932.37	1.8135	49.819	1
	High	GEDsAEETEAKPAVVAPAPVVEAVSTPSAAFPSDATAEQGPILTK	1	4	1	Q12906-5	S4(Phospho)	0	0				0.004	0.02791	12	73.3204	3	4515.18	2.39087	51.2644	0
Q5T6W2	Heterogeneous nuclear ribonucleoprotein K (Fragment) OS=Homo sapiens GN=HNRNPK PE=1 SV=1 - [Q5T6W2_HUMAN]	23.65	9.5	4	2	2	4	387008	1.24975	3	20.6542	379	41.7807	5.59229
	A2	Sequence	# PSMs	# Proteins	# Protein Groups	Protein Group Accessions	Modifications	ΔCn	Area	Light/Heavy	Light/Heavy Count	Light/Heavy Variability [%]	q-Value	PEP	IonScore	Exp Value	Charge	MH+ [Da]	ΔM [ppm]	RT [min]	# Missed Cleavages
	High	TDYNASVSVPDSSGPEr	1	4	1	Q5T6W2	R17(Arg10)	0	450095	1.24975	1		0	0.0001658	24.1	1.45075	2	1790.81	4.39604	30.1114	0
	High	GSYGDLGGPIITTQVTIPK	3	4	1	Q5T6W2		0	323921	1.37303	2	35.4295	0	0.0008613	20.05	3.20934	2	1917.03	-0.173705	47.009	0
H3BQZ7	HCG2044799 OS=Homo sapiens GN=HNRNPUL2-BSCL2 PE=4 SV=1 - [H3BQZ7_HUMAN]	22.69	3.08	2	2	2	2	1.98183e+06	2.10599	2	1.58584	746	84.6392	4.93213
	A2	Sequence	# PSMs	# Proteins	# Protein Groups	Protein Group Accessions	Modifications	ΔCn	Area	Light/Heavy	Light/Heavy Count	Light/Heavy Variability [%]	q-Value	PEP	IonScore	Exp Value	Charge	MH+ [Da]	ΔM [ppm]	RT [min]	# Missed Cleavages
	High	REEDEPEERsGDETPGSEVPGDK	1	2	1	H3BQZ7	S10(Phospho)	0	3.00866e+06	2.12864	1		0	0.0009925	22.69	2.44401	3	2624.07	1.42468	23.6247	2
	High	EEDEPEErsGDETPGSEVPGDk	1	2	1	H3BQZ7	R8(Arg10); S9(Phospho); K22(Lys8)	0	955002	2.08358	1		0.002	0.007662	10.16	35.0641	3	2485.99	1.61759	24.4297	1
P35527	Keratin, type I cytoskeletal 9 OS=Homo sapiens GN=KRT9 PE=1 SV=3 - [K1C9_HUMAN]	21.79	6.26	1	2	2	6	3.58394e+06	100	4	0	623	62.0268	5.23682
	A2	Sequence	# PSMs	# Proteins	# Protein Groups	Protein Group Accessions	Modifications	ΔCn	Area	Light/Heavy	Light/Heavy Count	Light/Heavy Variability [%]	q-Value	PEP	IonScore	Exp Value	Charge	MH+ [Da]	ΔM [ppm]	RT [min]	# Missed Cleavages
	High	GGSGGSYGGGGSGGGYGGGSGSR	4	1	1	P35527		0	2.32848e+06	89.8864	2	15.9074	0	6.56e-05	20.59	1.90482	2	1791.73	0.288985	16.5445	0
	High	SGGGGGGGLGSGGSIR	2	1	1	P35527		0	4.83941e+06	100	2	0	0.001	0.002257	13.98	7.80092	2	1232.6	0.739236	20.349	0
H3BR27	RNA-binding motif protein, X chromosome, N-terminally processed OS=Homo sapiens GN=RBMX PE=1 SV=1 - [H3BR27_HUMAN]	0	34.62	6	2	2	2	303230	1.13285	2	17.9248	78	8.60437	5.49072
	A2	Sequence	# PSMs	# Proteins	# Protein Groups	Protein Group Accessions	Modifications	ΔCn	Area	Light/Heavy	Light/Heavy Count	Light/Heavy Variability [%]	q-Value	PEP	IonScore	Exp Value	Charge	MH+ [Da]	ΔM [ppm]	RT [min]	# Missed Cleavages
	High	GFAFVTFESPADAk	1	6	1	H3BR27	K14(Lys8)	0	237950	1.27722	1		0.001	0.003495	18.86	4.08058	2	1494.74	0.143886	48.0327	0
	High	LFIGGLNTETNEK	1	6	1	H3BR27		0	368510	1.0048	1		0.002	0.01677	11.13	20.8722	2	1435.74	1.05102	38.0171	0

## Sheet: Chromatin-bound
Accession	Description	Score	Coverage	# Proteins	# Unique Peptides	# Peptides	# PSMs	Area	Light/Heavy	Light/Heavy Count	Light/Heavy Variability [%]	# AAs	MW [kDa]	calc. pI
P07910-4	Isoform 4 of Heterogeneous nuclear ribonucleoproteins C1/C2 OS=Homo sapiens GN=HNRNPC - [HNRPC_HUMAN]	814.847	52	6	10	10	52	1.6882e+07	1.04526	26	10.2514	250	27.8045	4.69092
	A2	Sequence	# PSMs	# Proteins	# Protein Groups	Protein Group Accessions	Modifications	ΔCn	Area	Light/Heavy	Light/Heavy Count	Light/Heavy Variability [%]	q-Value	PEP	IonScore	Exp Value	Charge	MH+ [Da]	ΔM [ppm]	RT [min]	# Missed Cleavages
	High	mESEGGADDsAEEGDLLDDDDNEDr	5	6	1	P07910-4	M1(Oxidation); S10(Phospho); R25(Arg10)	0	1.00303e+07	1.01846	3	0.93147	0	6.087e-09	69.52	1.62559e-05	2	2804.98	1.52487	34.0685	0
	High	mESEGGADDsAEEGDLLDDDDNEDRGDDQLELIK	4	6	1	P07910-4	M1(Oxidation); S10(Phospho)	0	7.87478e+06	1.13171	2	10.7191	0	3.126e-05	69.13	9.19893e-05	3	3806.51	5.89337	45.2128	1
	High	mESEGGADDsAEEGDLLDDDDNEDrGDDQLELIk	4	6	1	P07910-4	M1(Oxidation); S10(Phospho); R25(Arg10); K34(Lys8)	0	7.391e+06	1.01338	1		0	2.746e-07	67.67	0.000128516	3	3824.52	2.19322	45.8141	1
	High	GFAFVQYVNER	4	6	1	P07910-4		0	1.02739e+06	0.945922	3	9.94004	0	6.068e-05	61.29	0.000170189	2	1329.66	0.333857	44.8115	0
	High	mESEGGADDsAEEGDLLDDDDNEDR	6	6	1	P07910-4	M1(Oxidation); S10(Phospho)	0	1.03306e+07	0.972364	1		0	4.594e-07	58.21	0.000191403	2	2794.96	-0.490089	34.0463	0
	High	VFIGNLNTLVVK	1	6	1	P07910-4		0	1.36181e+06	0.890082	1		0	0.0002572	57.28	0.000151712	2	1316.8	1.6044	47.4372	0
	High	mESEGGADDsAEEGDLLDDDDNEDRGDDQLELIKDDEK	3	6	1	P07910-4	M1(Oxidation); S10(Phospho)	0	1.79357e+07	1.10153	2	8.48955	0	5.277e-05	46.12	0.0171443	3	4293.68	1.42862	42.3273	2
	High	mIAGQVLDINLAAEPK	3	6	1	P07910-4	M1(Oxidation)	0	1.74185e+06	1.16566	2	1.5414	0	8.19e-08	45.08	0.00978091	2	1698.91	1.01017	45.5086	0
	High	GFAFVQYVNEr	3	6	1	P07910-4	R11(Arg10)	0	1.00846e+06				0	0.0008197	43.52	0.0108334	2	1339.67	1.08404	44.2189	0
	High	mIAGQVLDINLAAEPk	3	6	1	P07910-4	M1(Oxidation); K16(Lys8)	0	1.56056e+06	1.11617	1		0	3.669e-08	41.89	0.0184371	2	1706.92	0.625093	45.4653	0
	High	VFIGNLNTLVVk	3	6	1	P07910-4	K12(Lys8)	0	1.60798e+06	0.880939	2	7.46718	0	0.0003049	38.4	0.0101325	2	1324.81	0.643956	47.8512	0
	High	mESEGGADDsAEEGDLLDDDDNEDrGDDQLELIkDDEk	5	6	1	P07910-4	M1(Oxidation); S10(Phospho); R25(Arg10); K34(Lys8); K38(Lys8)	0	1.63503e+07	1.06543	4	1.19167	0	2.861e-05	33.17	0.389751	4	4319.72	1.58996	42.3338	2
	High	NDKSEEEQSSSSVK	1	6	1	P07910-4		0	2.13225e+06				0.001	0.01241	10.59	21.5406	2	1553.69	0.904956	12.987	1
	High	QkVDSLLENLEk	2	6	1	P07910-4	K2(Lys8); K12(Lys8)	0	0				0.004	0.02815	23.09	0.933216	2	1431.8	1.39101	39.3603	1
	High	EAEEGEDDrDsANGEDDS	1	5	1	P07910-4	R9(Arg10); S11(Phospho)	0	2.34115e+06				0.005	0.04368	22.51	0.320358	2	2029.67	2.33157	14.8412	1
	High	NDkSEEEQSSSSVk	1	6	1	P07910-4	K3(Lys8); K14(Lys8)	0	2.17215e+06	1.00485	1		0.005	0.03109	20.87	2.38623	2	1569.72	0.846225	13.0707	1
	High	NDksEEEQSSSSVk	1	6	1	P07910-4	K3(Lys8); S4(Phospho); K14(Lys8)	0	2.23797e+07	0.878292	1		0.006	0.05187	17.57	3.54694	2	1649.69	1.30959	14.6268	1
	High	VPPPPPIAR	1	6	1	P07910-4		0	7.9817e+06	1.96944	1		0.007	0.06517	17.6	1.75257	2	943.573	0.208886	26.4784	0
	High	VPPPPPIAr	1	6	1	P07910-4	R9(Arg10)	0	3.80439e+06	1.80697	1		0.008	0.07098	19.74	1.17689	2	953.581	0.0480036	26.6783	0
P22626-2	Isoform A2 of Heterogeneous nuclear ribonucleoproteins A2/B1 OS=Homo sapiens GN=HNRNPA2B1 - [ROA2_HUMAN]	806.316	32.55	2	7	7	53	6.86682e+06	1.04248	28	14.378	341	35.9839	8.646
	A2	Sequence	# PSMs	# Proteins	# Protein Groups	Protein Group Accessions	Modifications	ΔCn	Area	Light/Heavy	Light/Heavy Count	Light/Heavy Variability [%]	q-Value	PEP	IonScore	Exp Value	Charge	MH+ [Da]	ΔM [ppm]	RT [min]	# Missed Cleavages
	High	IDTIEIITDr	3	2	1	P22626-2	R10(Arg10)	0	2.53352e+06	1.06117	2	0.647562	0	2.657e-05	82.89	1.03708e-06	2	1198.66	0.773615	40.7975	0
	High	IDTIEIITDR	3	2	1	P22626-2		0	2.70026e+06	1.0286	1		0	1.591e-07	82.4	1.18771e-06	2	1188.65	0.445301	41.049	0
	High	NmGGPYGGGNYGPGGSGGSGGYGGr	7	2	1	P22626-2	M2(Oxidation); R25(Arg10)	0	5.68908e+06	1.11916	5	10.8741	0	1.708e-09	77.76	5.68476e-06	2	2215.91	2.35598	27.0985	0
	High	NmGGPYGGGNYGPGGSGGSGGYGGR	7	2	1	P22626-2	M2(Oxidation)	0	6.65481e+06	1.11892	1		0	5.597e-08	71.86	2.1494e-05	2	2205.9	1.13483	27.0838	0
	High	GGNFGFGDSR	3	2	1	P22626-2		0	3.24187e+06	0.998847	1		0	2.24e-05	42.84	0.00499976	2	1013.44	0.299923	28.4024	0
	High	GGNFGFGDSr	3	2	1	P22626-2	R10(Arg10)	0	3.24561e+06	0.928696	2	3.55969	0	0.0006815	39.93	0.0105233	2	1023.45	0.20877	28.4079	0
	High	GFGDGYNGYGGGPGGGNFGGsPGYGGGr	4	2	1	P22626-2	S21(Phospho); R28(Arg10)	0	2.04981e+06	0.671722	3	5.30888	0	1.461e-05	38.26	0.0491204	2	2585.01	0.168176	39.6046	0
	High	GFGFVTFDDHDPVDk	4	2	1	P22626-2	K15(Lys8)	0	980441	1.06902	3	20.6586	0	0.0007401	34.35	0.121736	2	1703.78	1.15345	44.2685	0
	High	GFGDGYNGYGGGPGGGNFGGsPGYGGGR	3	2	1	P22626-2	S21(Phospho)	0	1.28341e+06	0.600446	1		0	1.623e-05	31.47	0.239447	2	2575.01	2.14753	38.9293	0
	High	GGGGNFGPGPGSNFr	3	2	1	P22626-2	R15(Arg10)	0	9.60372e+06	1.23036	2	0.719592	0	0.0003404	30.23	0.210596	2	1387.64	1.10946	29.7121	0
	High	GFGFVTFDDHDPVDK	7	2	1	P22626-2		0	1.44714e+06	1.13299	3	1.32027	0	0.0007101	30.17	0.310985	2	1695.77	1.03784	44.3258	0
	High	GGGGNFGPGPGSNFR	3	2	1	P22626-2		0	1.07e+07	1.12042	1		0	0.0006231	23.57	0.928751	2	1377.63	0.740012	29.6327	0
	High	LTDcVVmr	2	2	1	P22626-2	C4(Carbamidomethyl); M7(Oxidation); R8(Arg10)	0	1.24539e+06	0.842908	2	1.82887	0.001	0.01767	22.67	0.805454	2	1019.49	-1.03951	22.6479	0
	High	LTDcVVmR	1	2	1	P22626-2	C4(Carbamidomethyl); M7(Oxidation)	0	988818	0.828232	1		0.008	0.07471	24.04	0.545732	2	1009.48	-0.295292	23.0817	0
P51991-2	Isoform 2 of Heterogeneous nuclear ribonucleoprotein A3 OS=Homo sapiens GN=HNRNPA3 - [ROA3_HUMAN]	669.409	13.76	2	3	3	18	8.63373e+06	1.11807	11	6.88199	356	37.0062	8.30908
	A2	Sequence	# PSMs	# Proteins	# Protein Groups	Protein Group Accessions	Modifications	ΔCn	Area	Light/Heavy	Light/Heavy Count	Light/Heavy Variability [%]	q-Value	PEP	IonScore	Exp Value	Charge	MH+ [Da]	ΔM [ppm]	RT [min]	# Missed Cleavages
	High	SSGsPYGGGYGSGGGSGGYGSr	4	2	1	P51991-2	S4(Phospho); R22(Arg10)	0	2.2096e+07	1.10892	1		0	2.18e-09	130.39	1.63078e-11	2	2000.77	1.73569	25.5658	0
	High	SSGsPYGGGYGSGGGSGGYGSR	4	2	1	P51991-2	S4(Phospho)	0	2.45026e+07	1.11664	3	2.99891	0	8.637e-11	116.24	4.19393e-10	2	1990.76	1.85108	25.7822	0
	High	SSGSPYGGGYGSGGGSGGYGSR	1	2	1	P51991-2		0	6.85695e+06	1.17113	1		0	3.354e-11	97.52	4.9864e-08	2	1910.79	1.10978	24.9431	0
	High	SSGSPYGGGYGSGGGSGGYGSr	3	2	1	P51991-2	R22(Arg10)	0	5.99069e+06	1.1282	2	1.33741	0	2.50833e-11	65.08	9.30126e-05	2	1920.8	1.37475	25.1389	0
	High	IFVGGIKEDTEEYNLR	2	2	1	P51991-2		0	926828	9.41178	2	4847.33	0	9.157e-05	42.37	0.0250429	3	1882.96	1.66519	38.9478	1
	High	WGTLTDcVVmR	2	2	1	P51991-2	C7(Carbamidomethyl); M10(Oxidation)	0	471750	0.896899	1		0	0.001129	28.29	0.344018	2	1353.63	0.296854	37.2792	0
	High	WGTLTDcVVmr	1	2	1	P51991-2	C7(Carbamidomethyl); M10(Oxidation); R11(Arg10)	0	457210	1.0318	1		0.001	0.003779	28.61	0.326812	2	1363.64	-0.219128	36.6918	0
	High	IFVGGIkEDTEEYNLr	1	2	1	P51991-2	K7(Lys8); R16(Arg10)	0	0				0.002	0.01954	27.1	0.771846	3	1900.98	1.48516	38.9417	1
P62805	Histone H4 OS=Homo sapiens GN=HIST1H4A PE=1 SV=2 - [H4_HUMAN]	465.075	50.49	1	5	5	29	8.58917e+06	1.27047	15	9.55583	103	11.3604	11.356
	A2	Sequence	# PSMs	# Proteins	# Protein Groups	Protein Group Accessions	Modifications	ΔCn	Area	Light/Heavy	Light/Heavy Count	Light/Heavy Variability [%]	q-Value	PEP	IonScore	Exp Value	Charge	MH+ [Da]	ΔM [ppm]	RT [min]	# Missed Cleavages
	High	ISGLIYEETR	3	1	1	P62805		0	8.70116e+06	1.18153	2	1.22608	0	1.581e-05	67.79	3.30104e-05	2	1180.62	0.849104	33.9342	0
	High	TVTAmDVVYALk	3	1	1	P62805	M5(Oxidation); K12(Lys8)	0	4.10639e+06	1.27047	3	2.71936	0	1.298e-06	62.54	0.000130354	2	1334.71	0.343469	41.8496	0
	High	DNIQGITKPAIR	6	1	1	P62805		0	9.80664e+06	1.3047	4	1.81508	0	0.0005321	55.99	0.000428886	2	1325.75	0.696132	28.9408	0
	High	TVTAmDVVYALK	3	1	1	P62805	M5(Oxidation)	0	5.6721e+06				0	0.0001503	55.26	0.00071395	2	1326.7	1.29493	41.8199	0
	High	ISGLIYEETr	3	1	1	P62805	R10(Arg10)	0	7.30365e+06	1.25378	1		0	7.185e-07	52.79	0.00100575	2	1190.63	0.150979	33.9005	0
	High	DNIQGITkPAIr	7	1	1	P62805	K8(Lys8); R12(Arg10)	0	7.528e+06	1.3475	2	3.27482	0	9.332e-05	40.79	0.0127011	2	1343.78	0.68154	28.9761	0
	High	VFLENVIR	2	1	1	P62805		0	7.2597e+06	1.08344	2	1.00398	0.001	0.004092	49.27	0.00134453	2	989.578	0.160905	41.5149	0
	High	DAVTYTEHAk	1	1	1	P62805	K10(Lys8)	0	3.01479e+06	1.10222	1		0.006	0.05681	21.59	1.20483	2	1142.56	0.106834	19.0608	0
	High	DAVTYTEHAK	1	1	1	P62805		0	3.32296e+06				0.009	0.07688	15.45	4.80111	2	1134.54	-0.826523	18.8652	0
P11388	DNA topoisomerase 2-alpha OS=Homo sapiens GN=TOP2A PE=1 SV=3 - [TOP2A_HUMAN]	454.49	5.68	4	4	6	36	1.67454e+07	1.33581	22	11.7025	1531	174.276	8.71924
	A2	Sequence	# PSMs	# Proteins	# Protein Groups	Protein Group Accessions	Modifications	ΔCn	Area	Light/Heavy	Light/Heavy Count	Light/Heavy Variability [%]	q-Value	PEP	IonScore	Exp Value	Charge	MH+ [Da]	ΔM [ppm]	RT [min]	# Missed Cleavages
	High	NENTEGsPQEDGVELEGLK	7	4	1	P11388	S7(Phospho)	0	1.31247e+07	1.63944	4	4.18128	0	1.345e-06	64.15	0.000143126	2	2124.9	1.16681	37.4769	0
	High	NENTEGsPQEDGVELEGLk	4	4	1	P11388	S7(Phospho); K19(Lys8)	0	9.58459e+06	1.37265	2	0.390802	0	4.95e-09	56.96	0.000817371	2	2132.92	1.94546	36.9049	0
	High	IKNENTEGsPQEDGVELEGLK	6	4	1	P11388	S9(Phospho)	0	1.68674e+07	1.35541	4	3.42415	0	0.0004205	52.02	0.00398691	2	2366.08	1.21835	35.1295	1
	High	VPDEEENEEsDNEKETEK	4	4	1	P11388	S10(Phospho)	0	2.0244e+07	1.23475	4	0.481055	0	0.0006712	51.28	0.00159149	3	2229.86	0.516314	19.2216	1
	High	IkNENTEGsPQEDGVELEGLk	5	4	1	P11388	K2(Lys8); S9(Phospho); K21(Lys8)	0	1.26754e+07	1.3274	2	1.13394	0	0.0004118	40.77	0.0576513	3	2382.11	0.582585	35.1838	1
	High	GSVPLSSSPPAtHFPDETEITNPVPk	2	4	1	P11388	T12(Phospho); K26(Lys8)	0	4.29548e+06	1.58512	2	5.90949	0	0.0006464	17.6	14.8982	3	2792.33	2.60837	43.9321	0
	High	VPDEEENEEsDNEkETEk	4	4	1	P11388	S10(Phospho); K14(Lys8); K18(Lys8)	0	1.86656e+07	1.21249	1		0.001	0.01632	33	0.13076	2	2245.89	1.67979	18.4913	1
	High	GSVPLSSsPPATHFPDETEITNPVPK	1	4	1	P11388	S8(Phospho)	0	6.43222e+06				0.002	0.02113	12.8	44.9314	3	2784.32	2.23525	44.0479	0
	High	ELILFSNSDNER	1	6	2	P11388;Q02880-2		0	220403	1.58287	1		0.004	0.02783	11.01	23.9335	2	1436.7	1.30682	40.6446	0
	High	GSVPLSssPPATHFPDETEITNPVPK	1	4	1	P11388	S7(Phospho); S8(Phospho)	0	1.64432e+06	0.95498	1		0.005	0.04422	10.9	69.2694	3	2864.29	2.95345	46.147	0
	High	EVTFVPGLYk	1	6	2	P11388;Q02880-2	K10(Lys8)	0	379681	0.939168	1		0.008	0.07474	13.68	7.21676	2	1160.64	0.133037	41.7393	0
P09651-3	Isoform 2 of Heterogeneous nuclear ribonucleoprotein A1 OS=Homo sapiens GN=HNRNPA1 - [ROA1_HUMAN]	427.195	20.6	4	4	4	24	8.92104e+06	1.06794	14	19.8396	267	29.3682	9.14404
	A2	Sequence	# PSMs	# Proteins	# Protein Groups	Protein Group Accessions	Modifications	ΔCn	Area	Light/Heavy	Light/Heavy Count	Light/Heavy Variability [%]	q-Value	PEP	IonScore	Exp Value	Charge	MH+ [Da]	ΔM [ppm]	RT [min]	# Missed Cleavages
	High	NQGGYGGSSSSSSYGSGr	4	4	1	P09651-3	R18(Arg10)	0	1.67216e+07	0.862981	2	2.59742	0	2.053e-09	86.02	5.50076e-07	2	1704.71	1.08076	18.4172	0
	High	IEVIEImTDR	3	4	1	P09651-3	M7(Oxidation)	0	2.55256e+06	1.01329	2	0.431987	0	1.853e-07	73.35	1.02186e-05	2	1234.64	1.0689	35.9708	0
	High	NQGGYGGSSSSSSYGSGR	3	4	1	P09651-3		0	1.41799e+07	0.847933	1		0	3.146e-08	63.54	9.70375e-05	2	1694.7	1.71666	18.4263	0
	High	SSGPYGGGGQYFAkPr	5	4	1	P09651-3	K14(Lys8); R16(Arg10)	0	2.78231e+06	1.12679	4	2.36997	0	7.823e-06	56.29	0.000899322	2	1646.81	0.898886	28.3712	0
	High	IEVIEImTDr	3	4	1	P09651-3	M7(Oxidation); R10(Arg10)	0	2.51175e+06	0.898269	1		0	0.0001094	54.8	0.000726336	2	1244.64	1.08583	35.9762	0
	High	SSGPYGGGGQYFAKPR	3	4	1	P09651-3		0	3.2736e+06	1.21928	2	0.476367	0	0.0009054	16.77	7.64303	3	1628.78	0.267875	28.482	0
	High	SEsPkEPEQLr	1	4	1	P09651-3	S3(Phospho); K5(Lys8); R11(Arg10)	0	4.32254e+06	1.56572	1		0.005	0.04252	29.49	0.247413	3	1397.64	-0.0328785	21.8039	1
	High	SEsPKEPEQLR	2	4	1	P09651-3	S3(Phospho)	0	6.76789e+06	1.52978	1		0.005	0.04136	20.74	1.77606	3	1379.62	0.657539	21.7981	1
Q71U36-2	Isoform 2 of Tubulin alpha-1A chain OS=Homo sapiens GN=TUBA1A - [TBA1A_HUMAN]	394.8	27.64	4	7	7	35	2.25187e+06	1.50495	15	17.9995	416	46.2678	5.08447
	A2	Sequence	# PSMs	# Proteins	# Protein Groups	Protein Group Accessions	Modifications	ΔCn	Area	Light/Heavy	Light/Heavy Count	Light/Heavy Variability [%]	q-Value	PEP	IonScore	Exp Value	Charge	MH+ [Da]	ΔM [ppm]	RT [min]	# Missed Cleavages
	High	AVcmLSNTTAIAEAWAR	3	4	1	Q71U36-2	C3(Carbamidomethyl); M4(Oxidation)	0	1.32774e+06	1.25624	2	10.0609	0	3.717e-07	57.95	0.000753365	2	1880.9	-0.0482264	45.8278	0
	High	DVNAAIATIK	3	4	1	Q71U36-2		0	1.16996e+06	1.52831	2	7.51456	0	8.86e-05	50.61	0.00116919	2	1015.58	-0.838068	33.2869	0
	High	TIGGGDDSFNTFFSETGAGK	5	4	1	Q71U36-2		0	1.35033e+06	1.21334	1		0	3.261e-05	50.19	0.00414226	2	2007.9	1.99264	47.5072	0
	High	TIGGGDDSFNTFFSETGAGk	3	4	1	Q71U36-2	K20(Lys8)	0	1.18988e+06	1.10584	2	20.5667	0	9.669e-06	46.83	0.00953838	2	2015.92	4.14537	47.5973	0
	High	DVNAAIATIk	2	4	1	Q71U36-2	K10(Lys8)	0	669613	1.73753	1		0	7.718e-05	46.09	0.00269287	2	1023.59	0.561626	33.2976	0
	High	AVcmLSNTTAIAEAWAr	1	4	1	Q71U36-2	C3(Carbamidomethyl); M4(Oxidation); R17(Arg10)	0	987745				0	2.32e-05	36.1	0.113015	2	1890.91	0.485288	45.6791	0
	High	AVFVDLEPTVIDEVR	4	4	1	Q71U36-2		0	1.46986e+06	1.60106	2	9.19684	0	3.236e-05	35.25	0.0939201	2	1701.91	2.40225	52.1245	0
	High	VGINYQPPTVVPGGDLAk	4	4	1	Q71U36-2	K18(Lys8)	0	2.09583e+06	1.67393	2	2.07939	0	0.001366	32.14	0.177295	2	1833	-1.01471	41.8184	0
	High	AVFVDLEPTVIDEVr	3	4	1	Q71U36-2	R15(Arg10)	0	862951	1.62482	1		0	5.26e-05	30.32	0.276971	2	1711.92	2.19285	52.2405	0
	High	DYEEVGVDSVEGEGEEEGEEY	2	4	1	Q71U36-2		0	1.41215e+06				0	0.00035	27.23	0.511879	2	2348.91	3.48341	40.8864	0
	High	VGINYQPPTVVPGGDLAK	4	4	1	Q71U36-2		0	3.58173e+06	1.79424	1		0	0.0006377	19.73	3.38291	2	1824.99	2.07898	41.7821	0
	High	NLDIErPTYTNLNr	1	3	1	Q71U36-2	R6(Arg10); R14(Arg10)	0	1.70403e+06	1.38215	1		0.001	0.01062	13.88	15.5273	3	1738.9	0.827688	34.5588	0
P08238	Heat shock protein HSP 90-beta OS=Homo sapiens GN=HSP90AB1 PE=1 SV=4 - [HS90B_HUMAN]	329.63	10.64	1	7	8	20	7.52333e+06	0.946236	14	8.4432	724	83.2121	5.03369
	A2	Sequence	# PSMs	# Proteins	# Protein Groups	Protein Group Accessions	Modifications	ΔCn	Area	Light/Heavy	Light/Heavy Count	Light/Heavy Variability [%]	q-Value	PEP	IonScore	Exp Value	Charge	MH+ [Da]	ΔM [ppm]	RT [min]	# Missed Cleavages
	High	IEDVGsDEEDDSGkDk	1	1	1	P08238	S6(Phospho); K14(Lys8); K16(Lys8)	0	1.17867e+07	0.984934	1		0	1.166e-05	74.32	6.59404e-06	2	1833.73	1.45613	20.3786	1
	High	IEDVGsDEEDDSGk	1	1	1	P08238	S6(Phospho); K14(Lys8)	0	4.66649e+06	0.967453	1		0	1.864e-07	72.65	5.62264e-06	2	1582.59	1.4625	22.0938	0
	High	IEDVGsDEEDDSGK	3	1	1	P08238	S6(Phospho)	0	4.56938e+06	0.9791	2	3.36538	0	2.97e-06	58.12	0.000128038	2	1574.58	1.57214	22.1025	0
	High	ADLINNLGTIAK	3	3	2	P07900;P08238		0	1.55832e+06	0.87725	3	2.79375	0	5.996e-05	37.26	0.0312624	2	1242.71	0.259679	41.9598	0
	High	NPDDITQEEYGEFYK	2	1	1	P08238		0	832729	0.986601	2	25.5626	0	1.259e-07	36.49	0.0717706	2	1847.8	1.3729	39.471	0
	High	ELISNASDALDK	1	1	1	P08238		0	527865	0.423724	1		0	0.0001559	27.11	0.470874	2	1275.65	2.1025	32.7375	0
	High	NPDDITQEEYGEFYk	1	1	1	P08238	K15(Lys8)	0	712301				0	0.001429	17.09	6.63791	2	1855.81	1.41182	39.4447	0
	High	IEDVGsDEEDDSGKDK	2	1	1	P08238	S6(Phospho)	0	1.16091e+07	0.980709	1		0.001	0.01331	41.01	0.0111426	2	1817.7	1.24309	20.3255	1
	High	IEDVGsDEEDDSGKDKK	1	1	1	P08238	S6(Phospho)	0	6.11683e+06	0.906242	1		0.001	0.0157	39.92	0.025587	2	1945.79	0.346052	18.1213	2
	High	ADLINNLGTIAk	2	3	2	P07900;P08238	K12(Lys8)	0	1.81218e+06				0.001	0.003547	28.62	0.1969	2	1250.72	-1.13944	41.4133	0
	High	SIYYITGESk	1	1	1	P08238	K10(Lys8)	0	480356	1.20049	1		0.001	0.01077	28.04	0.305985	2	1168.6	0.81982	32.0475	0
	High	EQVANSAFVEr	1	1	1	P08238	R11(Arg10)	0	793234	0.935465	1		0.001	0.01068	26.14	0.513925	2	1259.63	0.342793	26.7072	0
	High	EQVANSAFVER	1	1	1	P08238		0	742043				0.001	0.00845	21.65	1.51281	2	1249.62	1.00391	26.7713	0
Q9NTI5-2	Isoform 2 of Sister chromatid cohesion protein PDS5 homolog B OS=Homo sapiens GN=PDS5B - [PDS5B_HUMAN]	329.132	5.97	2	6	6	33	6.13662e+06	1.38232	21	14.9769	1391	158.18	8.5874
	A2	Sequence	# PSMs	# Proteins	# Protein Groups	Protein Group Accessions	Modifications	ΔCn	Area	Light/Heavy	Light/Heavy Count	Light/Heavy Variability [%]	q-Value	PEP	IonScore	Exp Value	Charge	MH+ [Da]	ΔM [ppm]	RT [min]	# Missed Cleavages
	High	AEsPESSAIESTQSTPQK	7	2	1	Q9NTI5-2	S3(Phospho)	0	9.36487e+06	1.45479	6	6.20247	0	5.307e-10	86.63	7.26986e-07	2	1956.85	1.66849	26.5404	0
	High	AEsPESSAIESTQStPQK	3	2	1	Q9NTI5-2	S3(Phospho); T15(Phospho)	0	6.35799e+06	1.2861	3	0.476657	0	2.49e-06	51.96	0.0014277	2	2036.81	1.17246	26.4678	0
	High	AEsPESSAIESTQStPQk	3	2	1	Q9NTI5-2	S3(Phospho); T15(Phospho); K18(Lys8)	0	5050803				0	1.69e-05	50.39	0.00235156	2	2044.83	1.08918	26.4768	0
	High	AEsPESSAIESTQSTPQk	4	2	1	Q9NTI5-2	S3(Phospho); K18(Lys8)	0	6.29496e+06				0	5.318e-07	49.82	0.0038967	2	1964.86	1.20703	26.6667	0
	High	mETVSNASSSSNPSsPGR	3	2	1	Q9NTI5-2	M1(Oxidation); S15(Phospho)	0	2.91679e+06	1.14614	3	2.08577	0	2.072e-06	46.41	0.0047929	2	1890.75	0.506094	18.3661	0
	High	mETVSNASSSSNPSsPGr	2	2	1	Q9NTI5-2	M1(Oxidation); S15(Phospho); R18(Arg10)	0	2.50933e+06				0	0.0002475	32.64	0.12352	2	1900.76	1.35503	19.0519	0
	High	mETVSNASSSsNPsSPGr	1	2	1	Q9NTI5-2	M1(Oxidation); S11(Phospho); S14(Phospho); R18(Arg10)	0	736567	1.05645	1		0	4.138e-05	22.9	0.64877	2	1980.73	1.78204	19.0237	0
	High	LKEDILENEDEQNsPPKK	1	2	1	Q9NTI5-2	S14(Phospho)	0	2.9264e+06	1.34296	1		0	0.002001	18.34	8.5566	3	2206.03	1.22632	28.644	2
	High	LkEDILENEDEQNsPPk	3	2	1	Q9NTI5-2	K2(Lys8); S14(Phospho); K17(Lys8)	0	3.83731e+06	1.84882	3	8.28539	0.001	0.002598	21.8	3.37945	3	2093.96	0.671548	31.4793	1
	High	mETVSNASSSsNPsSPGR	1	2	1	Q9NTI5-2	M1(Oxidation); S11(Phospho); S14(Phospho)	0	778144				0.001	0.005875	18.16	1.86134	2	1970.72	1.77497	19.0774	0
	High	LKEDILENEDEQNsPPK	3	2	1	Q9NTI5-2	S14(Phospho)	0	6.11858e+06	2.02628	2	46.79	0.001	0.004598	12.33	26.6167	2	2077.93	0.0156339	31.3473	1
	High	GRPSKtPSPsQPK	1	2	1	Q9NTI5-2	T6(Phospho); S10(Phospho)	0	1.5758e+06	1.38232	1		0.002	0.02221	16.41	5.49458	2	1526.68	-0.575493	13.3548	1
	High	GHTASEsDEQQWPEEK	1	2	1	Q9NTI5-2	S7(Phospho)	0	1.20216e+06	1.50175	1		0.005	0.04197	25.6	0.550157	2	1937.76	2.05208	25.2601	0
P10809	60 kDa heat shock protein, mitochondrial OS=Homo sapiens GN=HSPD1 PE=1 SV=2 - [CH60_HUMAN]	314.867	11.69	1	5	5	20	1.83606e+06	1.13054	13	8.54136	573	61.0164	5.87158
	A2	Sequence	# PSMs	# Proteins	# Protein Groups	Protein Group Accessions	Modifications	ΔCn	Area	Light/Heavy	Light/Heavy Count	Light/Heavy Variability [%]	q-Value	PEP	IonScore	Exp Value	Charge	MH+ [Da]	ΔM [ppm]	RT [min]	# Missed Cleavages
	High	LVQDVANNTNEEAGDGTTTATVLAr	6	1	1	P10809	R25(Arg10)	0	3.85453e+06	1.12494	2	0.131721	0	1.021e-07	71.4	5.36698e-05	2	2570.26	1.4105	35.2759	0
	High	LVQDVANNTNEEAGDGTTTATVLAR	7	1	1	P10809		0	4.33226e+06	1.13579	4	2.84623	0	1.562e-08	63.06	0.000361045	2	2560.25	2.35718	35.2566	0
	High	VGLQVVAVk	2	1	1	P10809	K9(Lys8)	0	616034	0.947449	2	6.76094	0	0.001272	29.95	0.0302968	2	920.602	-0.347817	33.078	0
	High	GYISPYFINTSk	1	1	1	P10809	K12(Lys8)	0	559896	0.925641	1		0.001	0.005321	15.9	6.65861	2	1397.72	0.904482	41.0478	0
	High	TVIIEQSWGSPk	3	1	1	P10809	K12(Lys8)	0	553587	1.3364	3	8.4463	0.001	0.003729	15.84	6.26259	2	1352.73	1.96884	36.8548	0
	High	LSDGVAVLk	1	1	1	P10809	K9(Lys8)	0	485272	1.21481	1		0.005	0.03977	11.06	6.06375	2	909.549	-0.68555	29.8796	0
E9PCY7	Heterogeneous nuclear ribonucleoprotein H OS=Homo sapiens GN=HNRNPH1 PE=1 SV=1 - [E9PCY7_HUMAN]	304.538	13.05	3	4	4	27	2.89294e+06	1.19482	14	12.5203	429	47.0574	6.34131
	A2	Sequence	# PSMs	# Proteins	# Protein Groups	Protein Group Accessions	Modifications	ΔCn	Area	Light/Heavy	Light/Heavy Count	Light/Heavy Variability [%]	q-Value	PEP	IonScore	Exp Value	Charge	MH+ [Da]	ΔM [ppm]	RT [min]	# Missed Cleavages
	High	STGEAFVQFASQEIAEK	5	3	1	E9PCY7		0	1.30576e+06	0.873609	2	3.56336	0	3.055e-07	59.16	0.000553791	2	1841.89	-0.343392	49.382	0
	High	STGEAFVQFASQEIAEk	6	3	1	E9PCY7	K17(Lys8)	0	1.48732e+06	0.877927	1		0	1.659e-05	52.07	0.00298855	2	1849.91	2.07862	49.3212	0
	High	HTGPNsPDTANDGFVR	1	3	1	E9PCY7	S6(Phospho)	0	3.79239e+06	1.31443	1		0	0.0006713	35.89	0.0627592	3	1764.74	0.972092	26.0143	0
	High	HTGPNsPDTANDGFVr	5	3	1	E9PCY7	S6(Phospho); R16(Arg10)	0	6.04736e+06	1.23104	4	2.87863	0	0.0005028	30.65	0.211159	2	1774.74	1.54235	25.6402	0
	High	GLPWScSADEVQR	2	3	1	E9PCY7	C6(Carbamidomethyl)	0	766996	1.05631	2	37.6783	0	0.001019	23.68	1.11701	2	1504.69	1.06051	36.4132	0
	High	GLPWScSADEVQr	3	3	1	E9PCY7	C6(Carbamidomethyl); R13(Arg10)	0	654495	1.26479	1		0	0.0002862	23.38	1.20815	2	1514.69	0.0268064	36.368	0
	High	VHIEIGPDGr	2	3	1	E9PCY7	R10(Arg10)	0	1.02994e+06	1.11418	2	0.438362	0.001	0.008995	38.65	0.0235391	2	1102.59	-0.241447	27.7964	0
	High	VHIEIGPDGR	2	3	1	E9PCY7		0	1.14416e+06				0.001	0.01136	27.66	0.276633	2	1092.58	0.0624328	27.7713	0
	High	HTGPNSPDTANDGFVR	1	3	1	E9PCY7		0	1.42767e+06	1.32392	1		0.001	0.01729	10.56	30.0318	3	1684.77	0.234524	25.0322	0
A0A087WVQ9	Elongation factor 1-alpha 1 OS=Homo sapiens GN=EEF1A1 PE=4 SV=1 - [A0A087WVQ9_HUMAN]	301.686	9.07	4	4	4	14	2.57775e+06	1.04915	9	5.58039	441	47.8529	9.02686
	A2	Sequence	# PSMs	# Proteins	# Protein Groups	Protein Group Accessions	Modifications	ΔCn	Area	Light/Heavy	Light/Heavy Count	Light/Heavy Variability [%]	q-Value	PEP	IonScore	Exp Value	Charge	MH+ [Da]	ΔM [ppm]	RT [min]	# Missed Cleavages
	High	IGGIGTVPVGr	3	4	1	A0A087WVQ9	R11(Arg10)	0	3.21893e+06	1.09707	2	8.50541	0	1.161e-05	75.02	3.08165e-06	2	1035.62	-0.0815919	32.5149	0
	High	IGGIGTVPVGR	3	4	1	A0A087WVQ9		0	3.50279e+06	1.09116	1		0	4.137e-05	69.01	1.37535e-05	2	1025.61	0.362713	32.0253	0
	High	YYVTIIDAPGHr	2	4	1	A0A087WVQ9	R12(Arg10)	0	703339	1.03573	2	1.909	0	0.000307	47.08	0.00533589	2	1414.74	0.221244	36.0431	0
	High	LPLQDVYK	3	4	1	A0A087WVQ9		0	2.98913e+06	1.15255	2	8.51136	0	0.001919	44.83	0.00454637	2	975.551	-0.291652	33.9293	0
	High	LPLQDVYk	1	4	1	A0A087WVQ9	K8(Lys8)	0	2.32274e+06	1.01043	1		0.002	0.0191	36.69	0.029079	2	983.565	0.167672	34.4018	0
	High	QTVAVGVIK	1	4	1	A0A087WVQ9		0	1.24135e+06	0.849845	1		0.002	0.01989	35.13	0.0256263	2	914.567	-0.187237	28.0109	0
	High	YYVTIIDAPGHR	1	4	1	A0A087WVQ9		0	635313				0.002	0.01982	22.73	1.49974	2	1404.73	0.287096	36.1043	0
P60709	Actin, cytoplasmic 1 OS=Homo sapiens GN=ACTB PE=1 SV=1 - [ACTB_HUMAN]	299.142	28.27	2	8	8	29	4.32195e+06	1.29373	17	22.9733	375	41.7097	5.47803
	A2	Sequence	# PSMs	# Proteins	# Protein Groups	Protein Group Accessions	Modifications	ΔCn	Area	Light/Heavy	Light/Heavy Count	Light/Heavy Variability [%]	q-Value	PEP	IonScore	Exp Value	Charge	MH+ [Da]	ΔM [ppm]	RT [min]	# Missed Cleavages
	High	DLYANTVLSGGTTmYPGIADR	3	2	1	P60709	M14(Oxidation)	0	992439	1.11899	3	14.7441	0	4.381e-05	49.82	0.00634354	2	2231.07	2.85529	45.1894	0
	High	GYSFTTTAEr	3	2	1	P60709	R10(Arg10)	0	3.85324e+06	1.04881	2	4.0222	0	1.75e-05	49.04	0.00194405	2	1142.54	0.511056	28.2229	0
	High	SYELPDGQVITIGNEr	4	2	1	P60709	R16(Arg10)	0	1.6481e+06	1.46103	2	4.65166	0	0.0002018	48.13	0.00666713	2	1800.9	1.31889	45.3199	0
	High	AGFAGDDAPr	3	2	1	P60709	R10(Arg10)	0	1.91159e+06	1.29373	3	0.128437	0	0.001186	44.79	0.00338698	2	986.457	0.155479	21.66	0
	High	SYELPDGQVITIGNER	5	2	1	P60709		0	2.49902e+06	1.39094	1		0	1.45e-06	43.34	0.0202202	2	1790.89	1.24035	45.2568	0
	High	GYSFTTTAER	3	2	1	P60709		0	3.93321e+06	1.02681	1		0	0.001184	42.69	0.00779146	2	1132.53	-0.159204	27.8307	0
	High	DLYANTVLSGGTTmYPGIADr	2	2	1	P60709	M14(Oxidation); R21(Arg10)	0	686041				0	5.105e-05	36.28	0.148945	2	2241.08	1.33158	45.0258	0
	High	VAPEEHPVLLTEAPLNPK	1	2	1	P60709		0	6.04853e+06	1.84206	1		0	0.001154	24.57	0.999938	3	1954.06	0.211469	39.5688	0
	High	EITALAPSTmK	2	2	1	P60709	M10(Oxidation)	0	2.98411e+06	1.62157	2	5.94784	0.005	0.04467	21	1.4	2	1177.61	0.590151	27.4348	0
	High	QEYDESGPSIVHr	1	2	1	P60709	R13(Arg10)	0	756668	1.06253	1		0.005	0.04125	18.99	3.54889	3	1526.71	0.274183	25.9657	0
	High	IIAPPEr	1	2	1	P60709	R7(Arg10)	0	1.91962e+06	1.36052	1		0.006	0.05449	16.36	1.55833	2	805.481	0.237404	23.4282	0
	High	AGFAGDDAPR	1	2	1	P60709		0	2.44723e+06				0.009	0.08231	27.09	0.205499	2	976.449	0.312046	21.9597	0
D6RAF8	Heterogeneous nuclear ribonucleoprotein D0 (Fragment) OS=Homo sapiens GN=HNRNPD PE=1 SV=1 - [D6RAF8_HUMAN]	297.535	19.91	3	3	3	9	2.86651e+06	1.45572	5	12.8566	221	23.0622	5.10986
	A2	Sequence	# PSMs	# Proteins	# Protein Groups	Protein Group Accessions	Modifications	ΔCn	Area	Light/Heavy	Light/Heavy Count	Light/Heavy Variability [%]	q-Value	PEP	IonScore	Exp Value	Charge	MH+ [Da]	ΔM [ppm]	RT [min]	# Missed Cleavages
	High	IFVGGLSPDTPEEK	3	3	1	D6RAF8		0	2.54827e+06	1.78841	1		0	3.078e-08	72.03	1.92746e-05	2	1488.76	0.883765	37.6303	0
	High	IFVGGLSPDTPEEk	4	3	1	D6RAF8	K14(Lys8)	0	1.62099e+06	1.48535	2	2.98783	0	1.733e-05	69.55	3.31477e-05	2	1496.78	1.9133	37.0968	0
	High	IDASKNEEDEGHSNSsPR	1	3	1	D6RAF8	S16(Phospho)	0	5.75826e+06	1.33528	1		0.001	0.01622	32.47	0.161576	2	2051.83	1.70849	14.9422	1
	High	mFIGGLSWDTTk	1	3	1	D6RAF8	M1(Oxidation); K12(Lys8)	0	293005	0.832114	1		0.006	0.0509	21.57	1.81436	2	1379.68	1.8576	43.7525	0
E9PK09	Bcl-2-associated transcription factor 1 (Fragment) OS=Homo sapiens GN=BCLAF1 PE=1 SV=4 - [E9PK09_HUMAN]	275.938	6.34	7	4	4	18	1.31197e+07	1.16298	12	7.15873	725	83.0857	10.1401
	A2	Sequence	# PSMs	# Proteins	# Protein Groups	Protein Group Accessions	Modifications	ΔCn	Area	Light/Heavy	Light/Heavy Count	Light/Heavy Variability [%]	q-Value	PEP	IonScore	Exp Value	Charge	MH+ [Da]	ΔM [ppm]	RT [min]	# Missed Cleavages
	High	FNDsEGDDTEETEDYR	3	7	1	E9PK09	S4(Phospho)	0	7.01636e+06	0.842245	2	1.50906	0	4.887e-07	83.85	3.37302e-07	2	2001.69	1.60407	28.0346	0
	High	FNDsEGDDTEETEDYr	3	7	1	E9PK09	S4(Phospho); R16(Arg10)	0	7.75331e+06	0.920282	1		0	1.437e-05	67.94	1.30966e-05	2	2011.7	1.49052	28.2752	0
	High	YsPSQNsPIHHIPSR	3	7	1	E9PK09	S2(Phospho); S7(Phospho)	0	2.5858e+07	1.16316	2	1.11693	0.001	0.01708	40.95	0.0230491	2	1879.79	1.44069	28.3808	0
	High	QKFNDsEGDDTEETEDYR	3	7	1	E9PK09	S6(Phospho)	0	1.61539e+06	1.01063	2	24.9434	0.001	0.002387	22.94	0.915449	2	2257.84	1.21223	25.8544	1
	High	QkFNDsEGDDTEETEDYr	2	7	1	E9PK09	K2(Lys8); S6(Phospho); R18(Arg10)	0	1.84451e+06	0.921417	1		0.001	0.009113	22.2	1.23073	2	2275.86	0.663155	26.263	1
	High	YsPSQNsPIHHIPSr	3	7	1	E9PK09	S2(Phospho); S7(Phospho); R15(Arg10)	0	2.43381e+07	1.18501	3	1.68878	0.001	0.01367	20.62	2.59915	3	1889.8	1.24898	28.3357	0
	High	kAEGEPQEEsPLk	1	7	1	E9PK09	K1(Lys8); S10(Phospho); K13(Lys8)	0	5.74768e+06	1.22908	1		0.009	0.07809	29.84	0.272714	2	1537.71	0.792036	21.0748	1
P06733	Alpha-enolase OS=Homo sapiens GN=ENO1 PE=1 SV=2 - [ENOA_HUMAN]	275.127	23.73	1	7	7	35	1.54276e+06	1.04021	19	10.7272	434	47.1393	7.38623
	A2	Sequence	# PSMs	# Proteins	# Protein Groups	Protein Group Accessions	Modifications	ΔCn	Area	Light/Heavy	Light/Heavy Count	Light/Heavy Variability [%]	q-Value	PEP	IonScore	Exp Value	Charge	MH+ [Da]	ΔM [ppm]	RT [min]	# Missed Cleavages
	High	VVIGmDVAASEFFR	4	1	1	P06733	M5(Oxidation)	0	626548	0.942201	3	19.7812	0	1.447e-05	59.82	0.00035642	2	1556.78	2.53702	47.2949	0
	High	DATNVGDEGGFAPNILENK	4	1	1	P06733		0	1.87671e+06	1.03714	2	5.31836	0	1.118e-08	48.46	0.00734829	2	1960.93	2.464	42.6109	0
	High	DATNVGDEGGFAPNILENk	3	1	1	P06733	K19(Lys8)	0	1.7757e+06	0.957532	1		0	1.514e-06	46.56	0.0114397	2	1968.94	0.822298	42.3977	0
	High	YISPDQLADLYK	3	1	1	P06733		0	1.74206e+06	1.11803	1		0	1.651e-05	45.61	0.00745641	2	1425.73	0.984263	45.6549	0
	High	AAVPSGASTGIYEALELR	3	1	1	P06733		0	473159	1.21958	2	16.3363	0	0.0004335	31.56	0.248885	2	1804.95	1.74512	48.6916	0
	High	AAVPSGASTGIYEALELr	1	1	1	P06733	R18(Arg10)	0	432849				0	0.0003213	30.36	0.329337	2	1814.95	0.40785	48.7583	0
	High	YISPDQLADLYk	2	1	1	P06733	K12(Lys8)	0	1.47769e+06	1.19805	2	2.38838	0	0.0009947	25.8	0.711093	2	1433.74	2.65449	45.7543	0
	High	VVIGmDVAASEFFr	3	1	1	P06733	M5(Oxidation); R14(Arg10)	0	694175				0	0.001221	19.07	4.2404	2	1566.79	0.827052	47.241	0
	High	GNPTVEVDLFTSk	2	1	1	P06733	K13(Lys8)	0	465962	1.01026	1		0	0.0004019	14.7	9.40631	2	1414.73	1.25468	41.9152	0
	High	GNPTVEVDLFTSK	2	1	1	P06733		0	400638	1.08877	1		0.001	0.007187	24.93	0.937585	2	1406.72	0.334896	41.7941	0
	High	IGAEVYHNLk	3	1	1	P06733	K10(Lys8)	0	1.00951e+06	0.904389	2	12.0105	0.001	0.01528	18.02	2.77975	2	1151.63	0.220776	26.6911	0
	High	LAmQEFmILPVGAANFr	2	1	1	P06733	M3(Oxidation); M7(Oxidation); R17(Arg10)	0	270220	0.83472	1		0.001	0.007187	16.26	10.9187	2	1949.99	2.39769	51.2352	0
	High	IGAEVYHNLK	1	1	1	P06733		0	893388	1.03295	1		0.002	0.02325	20.56	1.57609	2	1143.62	-0.277415	26.6562	0
	High	LAmQEFmILPVGAANFR	2	1	1	P06733	M3(Oxidation); M7(Oxidation)	0	566567	1.04687	2	0.945735	0.002	0.01978	16.49	10.1087	2	1939.98	1.76444	51.2091	0
E9PKE3	Heat shock cognate 71 kDa protein OS=Homo sapiens GN=HSPA8 PE=1 SV=1 - [E9PKE3_HUMAN]	272.707	17.22	2	8	8	30	1.80294e+06	0.995791	20	16.6008	627	68.7632	5.51611
	A2	Sequence	# PSMs	# Proteins	# Protein Groups	Protein Group Accessions	Modifications	ΔCn	Area	Light/Heavy	Light/Heavy Count	Light/Heavy Variability [%]	q-Value	PEP	IonScore	Exp Value	Charge	MH+ [Da]	ΔM [ppm]	RT [min]	# Missed Cleavages
	High	TTPSYVAFTDTER	3	2	1	E9PKE3		0	1.27207e+06	1.11604	3	25.177	0	0.0001977	46.32	0.00685687	2	1487.7	1.25112	35.3127	0
	High	IINEPTAAAIAYGLDk	4	2	1	E9PKE3	K16(Lys8)	0	675399	1.13759	2	4.71761	0	1.333e-05	43.41	0.0130951	2	1667.91	0.0618722	44.8824	0
	High	IINEPTAAAIAYGLDK	3	2	1	E9PKE3		0	744279	1.029	1		0	6.275e-05	40.75	0.025591	2	1659.9	0.453277	45.3577	0
	High	STAGDTHLGGEDFDNr	2	2	1	E9PKE3	R16(Arg10)	0	1.12937e+06	0.799093	2	12.9445	0	5.255e-06	34.4	0.0918769	3	1701.73	-0.256606	26.2394	0
	High	DAGTIAGLNVLr	2	2	1	E9PKE3	R12(Arg10)	0	1.18206e+06	0.80715	1		0	0.001056	31.55	0.117189	2	1209.68	0.557863	42.6108	0
	High	NQVAmNPTNTVFDAk	3	2	1	E9PKE3	M5(Oxidation); K15(Lys8)	0	1.65107e+06	0.940892	3	4.59658	0	3.761e-06	30.72	0.31538	2	1673.81	0.944256	31.6109	0
	High	SQIHDIVLVGGSTr	3	2	1	E9PKE3	R14(Arg10)	0	494347	1.26944	2	20.1216	0	0.0002499	28.52	0.338295	2	1491.82	0.542566	33.4319	0
	High	NQVAmNPTNTVFDAK	3	2	1	E9PKE3	M5(Oxidation)	0	1.28487e+06				0	0.0007449	22.53	1.97084	2	1665.79	0.898837	31.5867	0
	High	SQIHDIVLVGGSTR	2	2	1	E9PKE3		0	717796	1.09681	1		0	0.0002201	19.02	2.97496	2	1481.81	0.936679	33.4129	0
	High	VEIIANDQGNr	3	2	1	E9PKE3	R11(Arg10)	0	2.48567e+06	0.986874	3	2.66788	0.001	0.006592	34.74	0.0833804	2	1238.64	0.418298	24.4838	0
	High	DAGTIAGLNVLR	1	2	1	E9PKE3		0	1.03326e+06	0.763826	1		0.001	0.002654	32.42	0.094139	2	1199.67	0.434273	42.6734	0
	High	NSLESYAFNmk	1	2	1	E9PKE3	M10(Oxidation); K11(Lys8)	0	402803	1.12282	1		0.001	0.01137	25.33	0.636004	2	1327.61	0.337951	34.6056	0
O60814	Histone H2B type 1-K OS=Homo sapiens GN=HIST1H2BK PE=1 SV=3 - [H2B1K_HUMAN]	234.316	31.75	11	4	4	19	6.80946e+06	1.07446	10	12.8347	126	13.8816	10.3159
	A2	Sequence	# PSMs	# Proteins	# Protein Groups	Protein Group Accessions	Modifications	ΔCn	Area	Light/Heavy	Light/Heavy Count	Light/Heavy Variability [%]	q-Value	PEP	IonScore	Exp Value	Charge	MH+ [Da]	ΔM [ppm]	RT [min]	# Missed Cleavages
	High	AmGImNSFVNDIFEr	5	11	1	O60814	M2(Oxidation); M5(Oxidation); R15(Arg10)	0	1.39967e+06	1.0141	2	5.8037	0	1.433e-05	65.33	0.000107315	2	1785.82	1.94877	50.5138	0
	High	AmGImNSFVNDIFER	6	11	1	O60814	M2(Oxidation); M5(Oxidation)	0	1.38578e+06	1.05457	1		0	3.65e-06	59.06	0.000441283	2	1775.81	0.0171191	50.7484	0
	High	LLLPGELAk	3	11	1	O60814	K9(Lys8)	0	1.55237e+07	1.37855	3	3.36433	0.001	0.01719	46.76	0.000777029	2	961.617	-0.206222	39.3371	0
	High	ESYSVYVYK	3	11	1	O60814		0	1.3626e+06	0.996326	3	18.8159	0.002	0.02065	14.72	5.69341	2	1137.55	1.43103	32.3605	0
	High	EIQTAVR	1	11	1	O60814		0	3.50498e+06	1.09473	1		0.005	0.03588	19.7	1.03562	2	816.457	-0.132659	18.4894	0
	High	ESYSVYVYk	1	11	1	O60814	K9(Lys8)	0	959914				0.008	0.06708	15.36	4.98169	2	1145.56	0.534633	32.7899	0
Q96JM3	Chromosome alignment-maintaining phosphoprotein 1 OS=Homo sapiens GN=CHAMP1 PE=1 SV=2 - [CHAP1_HUMAN]	232.802	11.82	1	5	5	31	8.56782e+06	1.22878	15	52.459	812	89.0429	8.44092
	A2	Sequence	# PSMs	# Proteins	# Protein Groups	Protein Group Accessions	Modifications	ΔCn	Area	Light/Heavy	Light/Heavy Count	Light/Heavy Variability [%]	q-Value	PEP	IonScore	Exp Value	Charge	MH+ [Da]	ΔM [ppm]	RT [min]	# Missed Cleavages
	High	LAPVPsPEPQkPAPVsPESVk	6	1	1	Q96JM3	S6(Phospho); K11(Lys8); S16(Phospho); K21(Lys8)	0	1.04616e+07	1.71358	3	3.48888	0	6.213e-06	47.04	0.01262	3	2330.14	1.373	34.8019	0
	High	LAPVPsPEPQKPAPVSPEsVK	7	1	1	Q96JM3	S6(Phospho); S19(Phospho)	0	1.81566e+07	1.7261	3	0.389194	0	4.225e-05	44.08	0.0247949	3	2314.11	0.703948	34.7247	0
	High	GQESssDQEQVDVESIDFSk	2	1	1	Q96JM3	S5(Phospho); S6(Phospho); K20(Lys8)	0	2.53371e+06	0.988308	2	1.11284	0	3.098e-05	40.16	0.0250547	2	2381.92	0.543707	41.5192	0
	High	DNQESsDAELSSSEYIK	4	1	1	Q96JM3	S6(Phospho)	0	1.73775e+06	0.829414	2	15.5264	0	7.579e-06	38.81	0.031276	2	1981.79	1.96144	33.6264	0
	High	DNQESsDAELSSSEYIk	4	1	1	Q96JM3	S6(Phospho); K17(Lys8)	0	2.05404e+06	0.857666	1		0	2.805e-05	38.06	0.0417751	2	1989.81	2.24076	33.5788	0
	High	GQEsSsDQEQVDVESIDFSK	5	1	1	Q96JM3	S4(Phospho); S6(Phospho)	0	2.84682e+06	1.07316	1		0	0.0003973	26.86	0.495066	2	2373.91	2.41309	41.4918	0
	High	KPsPSEsPEPWKPFPAVSPEPR	1	1	1	Q96JM3	S3(Phospho); S7(Phospho)	0	4.70003e+06	3.11838	1		0	0.0005104	23	3.82707	3	2606.18	1.95281	42.889	0
	High	GQESsSDQEQVDVESIDFSK	1	1	1	Q96JM3	S5(Phospho)	0	975926	1.22878	1		0.001	0.00242	14.81	11.1384	2	2293.93	-0.473027	39.4741	0
	High	kPSGsPDLWkLsPDQr	1	1	1	Q96JM3	K1(Lys8); S5(Phospho); K10(Lys8); S12(Phospho); R16(Arg10)	0	1.02685e+06	0.986964	1		0.004	0.02771	10.1	46.8194	2	1996.92	0.523989	36.7283	1
Q13283	Ras GTPase-activating protein-binding protein 1 OS=Homo sapiens GN=G3BP1 PE=1 SV=1 - [G3BP1_HUMAN]	212.655	9.66	1	2	2	12	2.05534e+06	1.03745	5	7.22613	466	52.1321	5.51611
	A2	Sequence	# PSMs	# Proteins	# Protein Groups	Protein Group Accessions	Modifications	ΔCn	Area	Light/Heavy	Light/Heavy Count	Light/Heavy Variability [%]	q-Value	PEP	IonScore	Exp Value	Charge	MH+ [Da]	ΔM [ppm]	RT [min]	# Missed Cleavages
	High	SSsPAPADIAQTVQEDLr	5	1	1	Q13283	S3(Phospho); R18(Arg10)	0	3.16568e+06	1.03745	3	0.677353	0	5.679e-08	70.47	4.08869e-05	2	1974.91	0.873069	49.688	0
	High	YQDEVFGGFVTEPQEEsEEEVEEPEER	2	1	1	Q13283	S17(Phospho)	0	813737	1.07731	2	19.4613	0	2.126e-06	50.74	0.00560438	2	3296.34	1.84501	48.1867	0
	High	SSsPAPADIAQTVQEDLR	5	1	1	Q13283	S3(Phospho)	0	3.29694e+06				0	0.000188	38.88	0.0578376	2	1964.9	-0.0705419	49.2479	0
Q8IYB3-2	Isoform 2 of Serine/arginine repetitive matrix protein 1 OS=Homo sapiens GN=SRRM1 - [SRRM1_HUMAN]	209.592	10.2	3	8	8	22	1.51072e+07	1.19774	14	28.8107	902	102.065	11.8101
	A2	Sequence	# PSMs	# Proteins	# Protein Groups	Protein Group Accessions	Modifications	ΔCn	Area	Light/Heavy	Light/Heavy Count	Light/Heavy Variability [%]	q-Value	PEP	IonScore	Exp Value	Charge	MH+ [Da]	ΔM [ppm]	RT [min]	# Missed Cleavages
	High	kETEsEAEDNLDDLEk	3	3	1	Q8IYB3-2	K1(Lys8); S5(Phospho); K16(Lys8)	0	2.98839e+06	1.12688	3	0.755103	0	4.984e-08	61.29	0.000228367	2	1960.82	-1.05524	33.9273	1
	High	KETEsEAEDNLDDLEK	3	3	1	Q8IYB3-2	S5(Phospho)	0	3.46612e+06				0	0.0001556	45.29	0.00826912	2	1944.8	1.67501	33.5591	1
	High	kEtEsEAEDNLDDLEk	3	3	1	Q8IYB3-2	K1(Lys8); T3(Phospho); S5(Phospho); K16(Lys8)	0	1.50907e+06	0.734725	3	2.22895	0	0.001345	36.85	0.0399031	2	2040.79	0.590136	35.9595	1
	High	KPPAPPsPVQSQSPStNWSPAVPVK	4	3	1	Q8IYB3-2	S7(Phospho); T16(Phospho)	0	6527112	2.07453	1		0	0.0005919	12.83	45.2162	3	2743.29	-1.11336	38.7264	0
	High	RRsPsPPPTR	1	3	1	Q8IYB3-2	S3(Phospho); S5(Phospho)	0	1.14648e+07	1.484	1		0.001	0.01082	31.4	0.127139	3	1310.58	-0.247742	13.8754	2
	High	APQTSSsPPPVr	1	3	1	Q8IYB3-2	S7(Phospho); R12(Arg10)	0	2.463e+06	1.41491	1		0.001	0.007376	29.68	0.231978	2	1313.61	0.978849	20.0338	0
	High	KPPAPPsPVQsQSPSTNWSPAVPVKK	3	3	1	Q8IYB3-2	S7(Phospho); S11(Phospho)	0	3.58692e+06	1.72393	2	41.9836	0.001	0.008814	18.64	11.5546	3	2871.4	4.20811	36.6727	1
	High	KEtEsEAEDNLDDLEK	1	3	1	Q8IYB3-2	T3(Phospho); S5(Phospho)	0	1.02648e+06				0.001	0.008375	17.88	2.73803	2	2024.76	1.23606	35.5134	1
	High	AAsPsPQSVR	1	3	1	Q8IYB3-2	S3(Phospho); S5(Phospho)	0	8.24851e+06	1.16821	1		0.001	0.01278	15.3	2.36982	2	1159.45	0.124319	18.3635	0
	High	RYsPsPPPK	1	3	1	Q8IYB3-2	S3(Phospho); S5(Phospho)	0	2.56082e+07	1.52849	1		0.004	0.02867	42.86	0.00517089	2	1188.49	0.599142	18.3449	1
	High	tAsPPPPPk	1	3	1	Q8IYB3-2	T1(Phospho); S3(Phospho); K9(Lys8)	0	2.39129e+06	1.2013	1		0.006	0.05638	10.29	9.07811	2	1059.44	0.463638	18.5906	0
Q9H6F5	Coiled-coil domain-containing protein 86 OS=Homo sapiens GN=CCDC86 PE=1 SV=1 - [CCD86_HUMAN]	207.207	12.78	1	2	2	15	9.39387e+06	0.961087	8	4.30502	360	40.2113	10.3306
	A2	Sequence	# PSMs	# Proteins	# Protein Groups	Protein Group Accessions	Modifications	ΔCn	Area	Light/Heavy	Light/Heavy Count	Light/Heavy Variability [%]	q-Value	PEP	IonScore	Exp Value	Charge	MH+ [Da]	ΔM [ppm]	RT [min]	# Missed Cleavages
	High	LQQGAGLESPQGQPEPGAAsPQr	6	1	1	Q9H6F5	S20(Phospho); R23(Arg10)	0	1.64281e+07	0.951155	3	1.78837	0	7.451e-09	73.89	2.93929e-05	2	2393.12	1.90777	28.7793	0
	High	LQQGAGLESPQGQPEPGAAsPQR	6	1	1	Q9H6F5	S20(Phospho)	0	1.63374e+07	0.982024	3	1.65519	0	2.007e-06	51.03	0.00547193	2	2383.11	2.41468	28.5823	0
	High	ALVEFESNPEETrEPGsPPSVQr	3	1	1	Q9H6F5	R13(Arg10); S17(Phospho); R23(Arg10)	0	2.35965e+06	0.810254	2	2.16196	0	0.0004311	32.17	0.46206	3	2655.22	-0.0619193	37.5652	1
Q9H1E3	Nuclear ubiquitous casein and cyclin-dependent kinase substrate 1 OS=Homo sapiens GN=NUCKS1 PE=1 SV=1 - [NUCKS_HUMAN]	203.926	8.23	1	2	2	14	1.75237e+06	1.15863	9	11.762	243	27.28	5.08447
	A2	Sequence	# PSMs	# Proteins	# Protein Groups	Protein Group Accessions	Modifications	ΔCn	Area	Light/Heavy	Light/Heavy Count	Light/Heavy Variability [%]	q-Value	PEP	IonScore	Exp Value	Charge	MH+ [Da]	ΔM [ppm]	RT [min]	# Missed Cleavages
	High	VVDYSQFQEsDDADEDYGR	4	1	1	Q9H1E3	S10(Phospho)	0	2.19426e+06	1.12199	2	16.5986	0	1.913e-06	52.44	0.00113007	2	2317.88	1.4955	35.7803	0
	High	KVVDYSQFQEsDDADEDYGR	3	1	1	Q9H1E3	S11(Phospho)	0	1.31047e+06	1.20267	3	19.5164	0	0.001163	47.89	0.00566666	2	2445.98	1.41747	33.6701	1
	High	VVDYSQFQEsDDADEDYGr	3	1	1	Q9H1E3	S10(Phospho); R19(Arg10)	0	1.85974e+06	1.09312	1		0	0.000201	37.2	0.0403767	2	2327.89	2.55149	36.2228	0
	High	kVVDYsQFQESDDADEDYGr	4	1	1	Q9H1E3	K1(Lys8); S6(Phospho); R20(Arg10)	0	1.16562e+06	1.15863	3	3.74942	0.001	0.003176	34.32	0.149207	2	2464	2.7914	33.6327	1
Q00839-2	Isoform Short of Heterogeneous nuclear ribonucleoprotein U OS=Homo sapiens GN=HNRNPU - [HNRPU_HUMAN]	186.04	7.44	2	5	5	17	2.11162e+06	0.948066	12	12.4251	806	88.9242	5.78271
	A2	Sequence	# PSMs	# Proteins	# Protein Groups	Protein Group Accessions	Modifications	ΔCn	Area	Light/Heavy	Light/Heavy Count	Light/Heavy Variability [%]	q-Value	PEP	IonScore	Exp Value	Charge	MH+ [Da]	ΔM [ppm]	RT [min]	# Missed Cleavages
	High	NFILDQTNVSAAAQR	5	2	1	Q00839-2		0	2.3255e+06	0.981245	5	14.485	0	1.123e-07	70.17	3.44353e-05	2	1647.85	1.28179	38.5479	0
	High	NFILDQTNVSAAAQr	3	2	1	Q00839-2	R15(Arg10)	0	2.96651e+06				0	2.193e-06	67.05	7.00013e-05	2	1657.86	1.21959	38.5418	0
	High	YNILGTNTImDk	2	2	1	Q00839-2	M10(Oxidation); K12(Lys8)	0	985539	0.986665	2	8.35194	0	1.39e-05	29.58	0.312892	2	1406.71	0.153529	36.5033	0
	High	YNILGTNTImDK	1	2	1	Q00839-2	M10(Oxidation)	0	755973				0	0.001162	18.89	3.52051	2	1398.69	0.793101	36.5091	0
	High	SSGPTSLFAVTVAPPGAr	2	2	1	Q00839-2	R18(Arg10)	0	1.86361e+06	1.15323	2	27.7728	0	0.0003939	10.1	31.1397	2	1724.92	0.967296	46.5913	0
	High	LNTLLQr	2	2	1	Q00839-2	R7(Arg10)	0	1.2826e+06	0.81251	2	4.34073	0.004	0.02944	29.81	0.0913085	2	867.529	0.0493206	28.61	0
	High	DIDIHEVr	1	2	1	Q00839-2	R8(Arg10)	0	662785	0.936721	1		0.004	0.03001	11.1	10.3474	2	1006.52	0.194177	26.7435	0
	High	SSGPTSLFAVTVAPPGAR	1	2	1	Q00839-2		0	2.08575e+06				0.005	0.03143	10.1	34.1496	2	1714.91	-0.0421339	46.386	0
M0QXS5	Heterogeneous nuclear ribonucleoprotein L (Fragment) OS=Homo sapiens GN=HNRNPL PE=1 SV=1 - [M0QXS5_HUMAN]	178.017	11.32	3	4	4	11	2.94667e+06	1.39097	5	7.65381	530	58.4353	6.78564
	A2	Sequence	# PSMs	# Proteins	# Protein Groups	Protein Group Accessions	Modifications	ΔCn	Area	Light/Heavy	Light/Heavy Count	Light/Heavy Variability [%]	q-Value	PEP	IonScore	Exp Value	Charge	MH+ [Da]	ΔM [ppm]	RT [min]	# Missed Cleavages
	High	NDQDTWDYTNPNLSGQGDPGSNPNkr	4	3	1	M0QXS5	K25(Lys8); R26(Arg10)	0	4.66209e+06	1.4479	2	1.69524	0	6.182e-09	63.63	0.000376352	3	2908.29	2.0656	33.785	1
	High	NDQDTWDYTNPNLSGQGDPGSNPNKR	4	3	1	M0QXS5		0	6.80085e+06	1.39097	1		0	2.884e-05	53.51	0.00366953	3	2890.27	1.61634	33.7193	1
	High	AITHLNNNFmFGQk	1	3	1	M0QXS5	M10(Oxidation); K14(Lys8)	0	686032	0.767973	1		0.001	0.01493	21.67	2.42252	2	1658.82	0.391205	34.8242	0
	High	TPASPVVHIr	1	2	1	M0QXS5	R10(Arg10)	0	478446	1.00896	1		0.005	0.03262	22.77	0.732425	2	1086.63	0.244767	25.6894	0
	High	LcFSTAQHAS	1	3	1	M0QXS5	C2(Carbamidomethyl)	0	1.35312e+06				0.005	0.04467	13.34	6.57399	2	1121.51	0.967862	26.2079	0
Q9UIG0-2	Isoform 2 of Tyrosine-protein kinase BAZ1B OS=Homo sapiens GN=BAZ1B - [BAZ1B_HUMAN]	173.3	3.38	2	2	2	8	4.83572e+06	0.979856	4	3.00953	1479	170.34	8.48486
	A2	Sequence	# PSMs	# Proteins	# Protein Groups	Protein Group Accessions	Modifications	ΔCn	Area	Light/Heavy	Light/Heavy Count	Light/Heavy Variability [%]	q-Value	PEP	IonScore	Exp Value	Charge	MH+ [Da]	ΔM [ppm]	RT [min]	# Missed Cleavages
	High	LAEDEGDsEPEAVGQSR	4	2	1	Q9UIG0-2	S8(Phospho)	0	8.44491e+06	0.98282	2	3.00953	0	2.524e-09	72.92	1.18412e-05	2	1868.76	1.24859	25.8812	0
	High	LAEDEGDsEPEAVGQSr	3	2	1	Q9UIG0-2	S8(Phospho); R17(Arg10)	0	8.38915e+06	0.996929	1		0	9.026e-07	55.31	0.000679278	2	1878.76	1.06393	25.5722	0
	High	sDVQEEsEGSDTDDNKDSAAFEDNEVQDEFLEK	1	2	1	Q9UIG0-2	S1(Phospho); S7(Phospho)	0	1.22652e+06	0.912537	1		0.006	0.05587	17.82	7.85921	3	3881.46	-0.598948	44.1877	1
P04264	Keratin, type II cytoskeletal 1 OS=Homo sapiens GN=KRT1 PE=1 SV=6 - [K2C1_HUMAN]	173.119	17.7	1	8	8	16	4.45059e+06	100	16	0	644	65.999	8.11865
	A2	Sequence	# PSMs	# Proteins	# Protein Groups	Protein Group Accessions	Modifications	ΔCn	Area	Light/Heavy	Light/Heavy Count	Light/Heavy Variability [%]	q-Value	PEP	IonScore	Exp Value	Charge	MH+ [Da]	ΔM [ppm]	RT [min]	# Missed Cleavages
	High	FLEQQNQVLQTK	3	1	1	P04264		0	1.99499e+06	100	3	0	0	2.057e-06	51.4	0.00192954	2	1475.79	1.32658	32.2502	0
	High	QISNLQQSISDAEQR	3	1	1	P04264		0	1.07758e+06	90.9585	3	8.10512	0	2.604e-06	31.08	0.320744	2	1716.85	1.81398	36.5428	0
	High	GGGGGGYGSGGSSYGSGGGSYGSGGGGGGGR	1	1	1	P04264		0	586526	37.8658	1		0	0.000111	24.71	1.18475	2	2383.96	2.5521	22.4744	0
	High	SISISVAR	2	1	1	P04264		0	5.13914e+06	100	2	0	0.001	0.01037	36.27	0.0226488	2	832.489	0.762948	29.066	0
	High	YEELQITAGR	1	1	1	P04264		0	496518	61.2795	1		0.001	0.009951	27.63	0.350345	2	1179.6	0.861925	31.8008	0
	High	SLNNQFASFIDK	2	1	1	P04264		0	617117	83.2504	2	13.2718	0.001	0.006677	21.03	2.1737	2	1383.69	-0.0926178	44.5041	0
	High	SGGGFSSGSAGIINYQR	1	1	1	P04264		0	354239	31.4787	1		0.001	0.002089	15.89	9.62642	2	1657.8	4.97874	35.6828	0
	High	SLVNLGGSK	3	1	1	P04264		0	6.21766e+06	100	3	0	0.002	0.02127	23.18	0.501515	2	874.499	-0.053926	28.0914	0
E7EUT5	Glyceraldehyde-3-phosphate dehydrogenase OS=Homo sapiens GN=GAPDH PE=1 SV=1 - [E7EUT5_HUMAN]	153.714	23.08	3	4	4	10	1.43775e+06	1.19748	8	19.8922	260	27.8531	6.94678
	A2	Sequence	# PSMs	# Proteins	# Protein Groups	Protein Group Accessions	Modifications	ΔCn	Area	Light/Heavy	Light/Heavy Count	Light/Heavy Variability [%]	q-Value	PEP	IonScore	Exp Value	Charge	MH+ [Da]	ΔM [ppm]	RT [min]	# Missed Cleavages
	High	VPTANVSVVDLTcr	2	3	1	E7EUT5	C13(Carbamidomethyl); R14(Arg10)	0	1.2868e+06	1.1369	2	8.33209	0	3.245e-05	54.24	0.00118473	2	1540.8	1.10115	39.1457	0
	High	VPTANVSVVDLTcR	3	3	1	E7EUT5	C13(Carbamidomethyl)	0	1.42483e+06	1.19248	1		0	1.525e-05	51.79	0.00216412	2	1530.8	1.00785	39.1518	0
	High	IISNAScTTNcLAPLAK	2	3	1	E7EUT5	C7(Carbamidomethyl); C11(Carbamidomethyl)	0	658615	1.33365	2	19.6858	0	0.000665	20.47	3.94599	2	1833.92	0.686402	35.9952	0
	High	GALQNIIPASTGAAk	1	3	1	E7EUT5	K15(Lys8)	0	1.52963e+06	1.62486	1		0.001	0.006522	23.09	0.854425	2	1419.81	1.44944	37.5393	0
	High	LISWYDNEFGYSNr	1	3	1	E7EUT5	R14(Arg10)	0	266232	0.741996	1		0.001	0.003496	22.44	2.17746	2	1773.81	2.07933	46.7222	0
	High	GALQNIIPASTGAAK	1	3	1	E7EUT5		0	2.22979e+06	1.40206	1		0.002	0.018	18.96	2.43633	2	1411.79	1.65811	38.0819	0
A0A087WUV6	AT-rich interactive domain-containing protein 1A OS=Homo sapiens GN=ARID1A PE=1 SV=1 - [A0A087WUV6_HUMAN]	148.324	4.91	4	3	3	17	2.29968e+06	1.54	7	4.10156	1141	121.668	9.24658
	A2	Sequence	# PSMs	# Proteins	# Protein Groups	Protein Group Accessions	Modifications	ΔCn	Area	Light/Heavy	Light/Heavy Count	Light/Heavy Variability [%]	q-Value	PEP	IonScore	Exp Value	Charge	MH+ [Da]	ΔM [ppm]	RT [min]	# Missed Cleavages
	High	GPsPSPVGSPASVAQSR	3	4	1	A0A087WUV6	S3(Phospho)	0	4.92934e+06	1.57562	1		0	0.0001554	64.64	0.000111588	2	1660.77	1.67144	29.0196	0
	High	GPsPSPVGSPASVAQSr	3	4	1	A0A087WUV6	S3(Phospho); R17(Arg10)	0	3.17155e+06	1.5471	2	0.682	0	5.892e-05	41.05	0.0273615	2	1670.78	2.11882	29.3065	0
	High	NPQmPQYSSPQPGSALsPr	4	4	1	A0A087WUV6	M4(Oxidation); S17(Phospho); R19(Arg10)	0	982831	1.34294	2	10.1553	0	0.001278	31.34	0.35073	2	2147.95	2.95891	30.7903	0
	High	SNsVGIQDAFNDGSDSTFQk	4	4	1	A0A087WUV6	S3(Phospho); K20(Lys8)	0	760904	0.750214	1		0	0.0002128	30.23	0.376996	2	2204.92	1.1116	41.5266	0
	High	NPQmPQYSSPQPGsALSPR	2	4	1	A0A087WUV6	M4(Oxidation); S14(Phospho)	0	1.2088e+06	1.58318	1		0.001	0.01374	26.31	1.07294	2	2137.94	3.41467	30.7204	0
	High	SNsVGIQDAFNDGSDSTFQK	1	4	1	A0A087WUV6	S3(Phospho)	0	0				0.001	0.004172	24.68	1.24692	2	2196.91	0.911074	41.3083	0
Q9UQE7	Structural maintenance of chromosomes protein 3 OS=Homo sapiens GN=SMC3 PE=1 SV=2 - [SMC3_HUMAN]	145.952	3.37	1	3	3	15	1.68083e+06	1.10711	9	22.3211	1217	141.454	7.18115
	A2	Sequence	# PSMs	# Proteins	# Protein Groups	Protein Group Accessions	Modifications	ΔCn	Area	Light/Heavy	Light/Heavy Count	Light/Heavy Variability [%]	q-Value	PEP	IonScore	Exp Value	Charge	MH+ [Da]	ΔM [ppm]	RT [min]	# Missed Cleavages
	High	GDVEGSQsQDEGEGSGESER	2	1	1	Q9UQE7	S8(Phospho)	0	882786	1.13936	2	4.25858	0	1.06e-05	70.46	1.10413e-05	2	2118.78	1.49732	18.7052	0
	High	GSGSQSsVPSVDQFTGVGIr	4	1	1	Q9UQE7	S7(Phospho); R20(Arg10)	0	1.10376e+06	1.58875	2	15.2851	0	0.000123	37.41	0.0846212	2	2054.94	0.851515	44.4851	0
	High	GSGsQSSVPSVDQFTGVGIR	4	1	1	Q9UQE7	S4(Phospho)	0	1.98585e+06	1.65851	1		0	0.0001225	23.58	2.14661	2	2044.94	1.67585	45.061	0
	High	GDVEGSQsQDEGEGSGESEr	1	1	1	Q9UQE7	S8(Phospho); R20(Arg10)	0	919061	0.955546	1		0	0.0003768	22.44	0.775708	2	2128.78	0.817098	17.1343	0
	High	KGDVEGSQsQDEGEGSGESER	3	1	1	Q9UQE7	S9(Phospho)	0	2.13758e+06	0.954111	3	4.81797	0.001	0.003431	32.3	0.12454	2	2246.87	0.86898	16.6109	1
	High	kGDVEGSQsQDEGEGSGESEr	1	1	1	Q9UQE7	K1(Lys8); S9(Phospho); R21(Arg10)	0	2.12933e+06				0.001	0.01289	31.32	0.192593	2	2264.89	1.39791	16.5929	1
Q02880-2	Isoform Beta-1 of DNA topoisomerase 2-beta OS=Homo sapiens GN=TOP2B - [TOP2B_HUMAN]	144.319	7.59	2	6	8	32	9.78061e+06	1.1059	18	27.1129	1621	182.548	8.06006
	A2	Sequence	# PSMs	# Proteins	# Protein Groups	Protein Group Accessions	Modifications	ΔCn	Area	Light/Heavy	Light/Heavy Count	Light/Heavy Variability [%]	q-Value	PEP	IonScore	Exp Value	Charge	MH+ [Da]	ΔM [ppm]	RT [min]	# Missed Cleavages
	High	FDsNEEDSASVFSPSFGLK	5	2	1	Q02880-2	S3(Phospho)	0	881219	0.886622	3	3.72818	0	4.642e-05	39.54	0.0358978	2	2142.89	-0.913238	51.0843	0
	High	FDsNEEDSASVFSPSFGLk	3	2	1	Q02880-2	S3(Phospho); K19(Lys8)	0	996022				0	2.912e-06	33.52	0.15551	2	2150.91	0.434178	50.9878	0
	High	VVEAVNsDsDSEFGIPK	2	2	1	Q02880-2	S7(Phospho); S9(Phospho)	0	2.0778e+07	1.12886	1		0	2.12e-05	25.83	0.683733	2	1952.8	1.47303	41.0352	0
	High	VVEAVNsDSDsEFGIPk	3	2	1	Q02880-2	S7(Phospho); S11(Phospho); K17(Lys8)	0	1.82337e+07	1.1059	2	0.600046	0	0.001803	25	0.883066	2	1960.81	1.4472	41.414	0
	High	SEDDSAKFDsNEEDSASVFSPSFGLK	2	2	1	Q02880-2	S10(Phospho)	0	2.12517e+06	1.0584	1		0	0.0002221	22.91	2.94064	3	2875.19	1.50591	47.9042	1
	High	kVVEAVNsDsDSEFGIPk	2	2	1	Q02880-2	K1(Lys8); S8(Phospho); S10(Phospho); K18(Lys8)	0	4.49727e+06	1.08315	2	1.42255	0	6.586e-05	17.3	7.84032	2	2096.92	2.55757	39.4978	1
	High	KVVEAVNsDsDSEFGIPK	2	2	1	Q02880-2	S8(Phospho); S10(Phospho)	0	4.7155e+06	1.04139	1		0.001	0.004365	35.21	0.112159	2	2080.89	0.502753	38.7897	1
	High	VkASPItNDGEDEFVPsDGLDkDEYTFSPGk	1	2	1	Q02880-2	K2(Lys8); T7(Phospho); S17(Phospho); K22(Lys8); K31(Lys8)	0	2.32427e+06	1.68154	1		0.001	0.00593	20.74	9.65913	4	3541.55	2.2798	45.0007	2
	High	SEDDSAkFDsNEEDSASVFSPSFGLk	2	2	1	Q02880-2	K7(Lys8); S10(Phospho); K26(Lys8)	0	1.6808e+06	1.12618	1		0.001	0.01694	19.63	7.56534	3	2891.22	3.62396	47.3666	1
	High	KTsFDQDSDVDIFPSDFPTEPPSLPR	4	2	1	Q02880-2	S3(Phospho)	0	1.60017e+06	1.81171	2	12.1783	0.001	0.004545	16.37	22.3051	3	3017.35	1.89074	53.4571	1
	High	kTSFDQDsDVDIFPSDFPTEPPSLPr	3	2	1	Q02880-2	K1(Lys8); S8(Phospho); R26(Arg10)	0	804019	3.00572	1		0.001	0.01024	15.87	24.9051	3	3035.37	-0.515658	53.8054	1
	High	VKASPItNDGEDEFVPsDGLDKDEYTFSPGK	1	2	1	Q02880-2	T7(Phospho); S17(Phospho)	0	3.84831e+06	1.65335	1		0.001	0.01623	14.48	35.0142	4	3517.5	1.07919	45.0601	2
	High	ELILFSNSDNER	1	6	2	P11388;Q02880-2		0	220403	1.58287	1		0.004	0.02783	11.01	23.9335	2	1436.7	1.30682	40.6446	0
	High	EVTFVPGLYk	1	6	2	P11388;Q02880-2	K10(Lys8)	0	379681	0.939168	1		0.008	0.07474	13.68	7.21676	2	1160.64	0.133037	41.7393	0
H0Y6E7	RNA-binding motif protein, X chromosome, N-terminally processed (Fragment) OS=Homo sapiens GN=RBMX PE=1 SV=2 - [H0Y6E7_HUMAN]	139.496	13.7	6	3	3	9	694643	0.955796	7	15.6038	292	31.8364	9.84717
	A2	Sequence	# PSMs	# Proteins	# Protein Groups	Protein Group Accessions	Modifications	ΔCn	Area	Light/Heavy	Light/Heavy Count	Light/Heavy Variability [%]	q-Value	PEP	IonScore	Exp Value	Charge	MH+ [Da]	ΔM [ppm]	RT [min]	# Missed Cleavages
	High	GFAFVTFESPADAk	3	6	1	H0Y6E7	K14(Lys8)	0	826109	1.00712	2	7.76672	0	7.773e-05	61.07	0.000240429	2	1494.74	1.28722	48.2952	0
	High	GFAFVTFESPADAK	2	6	1	H0Y6E7		0	838976	0.883111	1		0	0.000109	51.32	0.00210598	2	1486.72	1.07397	48.2867	0
	High	LFIGGLNTETNEK	3	6	1	H0Y6E7		0	646224	0.884871	3	5.58826	0	9.782e-05	30.53	0.240973	2	1435.75	1.81622	38.1483	0
	High	VEQATkPSFESGr	1	3	1	H0Y6E7	K6(Lys8); R13(Arg10)	0	598730	1.11008	1		0.001	0.01519	10.09	29.7716	2	1453.74	0.531749	21.0793	0
P13645	Keratin, type I cytoskeletal 10 OS=Homo sapiens GN=KRT10 PE=1 SV=6 - [K1C10_HUMAN]	125.317	9.93	1	4	4	10	1.73765e+06	91.7741	10	12.7784	584	58.7917	5.21143
	A2	Sequence	# PSMs	# Proteins	# Protein Groups	Protein Group Accessions	Modifications	ΔCn	Area	Light/Heavy	Light/Heavy Count	Light/Heavy Variability [%]	q-Value	PEP	IonScore	Exp Value	Charge	MH+ [Da]	ΔM [ppm]	RT [min]	# Missed Cleavages
	High	GSLGGGFSSGGFSGGSFSR	3	1	1	P13645		0	2.63759e+06	100	3	0	0	1.06e-05	48.26	0.00509043	2	1707.77	0.805651	39.6132	0
	High	ISSSKGSLGGGFSSGGFSGGSFSR	3	1	1	P13645		0	1.02529e+06	70.3918	3	27.0772	0	4.798e-05	27.04	1.19369	3	2210.05	0.789629	37.2879	1
	High	NVSTGDVNVEmNAAPGVDLTQLLNNmR	2	1	1	P13645	M11(Oxidation); M26(Oxidation)	0	693887	35.3532	2	12.454	0	9.23e-05	26.99	1.84857	3	2904.39	1.29372	50.2616	0
	High	LAADDFR	2	1	1	P13645		0	1.55005e+06	100	2	0	0.001	0.01316	24.74	0.347656	2	807.399	-0.311753	25.8864	0
P55081	Microfibrillar-associated protein 1 OS=Homo sapiens GN=MFAP1 PE=1 SV=2 - [MFAP1_HUMAN]	120.3	14.81	1	4	4	22	3.7902e+06	1.02941	16	14.9492	439	51.9266	4.98291
	A2	Sequence	# PSMs	# Proteins	# Protein Groups	Protein Group Accessions	Modifications	ΔCn	Area	Light/Heavy	Light/Heavy Count	Light/Heavy Variability [%]	q-Value	PEP	IonScore	Exp Value	Charge	MH+ [Da]	ΔM [ppm]	RT [min]	# Missed Cleavages
	High	kIVEPEVVGEsDsEVEGDAWr	3	1	1	P55081	K1(Lys8); S11(Phospho); S13(Phospho); R21(Arg10)	0	1.28655e+06	1.04914	2	30.5446	0	0.0002214	56.06	0.00128999	2	2508.07	-1.18784	42.8319	1
	High	SLAALDALNtDDENDEEEYEAWK	3	1	1	P55081	T10(Phospho)	0	934656	0.972761	2	10.8536	0	6.968e-07	43.97	0.018516	2	2721.11	-0.145626	50.4092	0
	High	sLAALDALNTDDENDEEEYEAWk	3	1	1	P55081	S1(Phospho); K23(Lys8)	0	1.03358e+06	0.886399	1		0	0.0001251	35.46	0.144157	2	2729.12	-0.875092	50.4554	0
	High	IVEPEVVGEsDsEVEGDAWr	4	1	1	P55081	S10(Phospho); S12(Phospho); R20(Arg10)	0	7.87388e+06	1.02941	4	4.92242	0	9.162e-05	28.88	0.482864	2	2371.97	2.46548	44.852	0
	High	KIVEPEVVGEsDsEVEGDAWR	4	1	1	P55081	S11(Phospho); S13(Phospho)	0	1.56437e+06	0.954349	3	8.17932	0	0.001164	27.31	0.956676	3	2490.05	2.03654	42.3813	1
	High	IVEPEVVGEsDsEVEGDAWR	2	1	1	P55081	S10(Phospho); S12(Phospho)	0	7.88891e+06	1.0041	1		0.001	0.002651	20.75	3.03407	2	2361.96	1.42884	45.3307	0
	High	RPDYAPmEssDEEDEEFQFIK	3	1	1	P55081	M7(Oxidation); S9(Phospho); S10(Phospho)	0	1.91733e+06	1.28277	3	14.7955	0.001	0.00295	15.51	7.14223	3	2738.03	1.77436	45.7825	0
H3BQZ7	HCG2044799 OS=Homo sapiens GN=HNRNPUL2-BSCL2 PE=4 SV=1 - [H3BQZ7_HUMAN]	119.881	3.08	2	3	3	13	1.0497e+07	1.7038	7	17.9636	746	84.6392	4.93213
	A2	Sequence	# PSMs	# Proteins	# Protein Groups	Protein Group Accessions	Modifications	ΔCn	Area	Light/Heavy	Light/Heavy Count	Light/Heavy Variability [%]	q-Value	PEP	IonScore	Exp Value	Charge	MH+ [Da]	ΔM [ppm]	RT [min]	# Missed Cleavages
	High	sGDETPGSEVPGDk	4	2	1	H3BQZ7	S1(Phospho); K14(Lys8)	0	1.67378e+07	1.52153	2	5.20267	0	0.0001117	57.62	0.000210346	2	1462.58	0.67852	23.117	0
	High	sGDETPGSEVPGDK	3	2	1	H3BQZ7	S1(Phospho)	0	2.51829e+07	1.50834	1		0	0.0005015	38.45	0.0172396	2	1454.57	1.12857	22.5161	0
	High	rEEDEPEErsGDETPGSEVPGDk	1	2	1	H3BQZ7	R1(Arg10); R9(Arg10); S10(Phospho); K23(Lys8)	0	2.05429e+06	1.7038	1		0.001	0.003618	29.99	0.502556	3	2652.1	1.25784	24.0068	2
	High	REEDEPEERsGDETPGSEVPGDK	2	2	1	H3BQZ7	S10(Phospho)	0	3.6623e+06	1.80665	1		0.001	0.00295	26.29	1.07002	3	2624.07	1.63402	23.5762	2
	High	EEDEPEErSGDEtPGSEVPGDk	2	2	1	H3BQZ7	R8(Arg10); T13(Phospho); K22(Lys8)	0	1.52032e+06	2.03665	2	8.65076	0.001	0.004622	24.51	1.27262	3	2485.99	0.807387	24.8092	1
	High	EEDEPEERsGDETPGSEVPGDK	1	2	1	H3BQZ7	S9(Phospho)	0	2.6458e+06				0.001	0.01319	11.32	22.3142	3	2467.97	1.31076	24.8028	1
B4DLW8	Probable ATP-dependent RNA helicase DDX5 OS=Homo sapiens GN=DDX5 PE=1 SV=1 - [B4DLW8_HUMAN]	117.389	7.29	3	1	3	8	925351	1.07723	5	18.9802	535	60.5254	9.0708
	A2	Sequence	# PSMs	# Proteins	# Protein Groups	Protein Group Accessions	Modifications	ΔCn	Area	Light/Heavy	Light/Heavy Count	Light/Heavy Variability [%]	q-Value	PEP	IonScore	Exp Value	Charge	MH+ [Da]	ΔM [ppm]	RT [min]	# Missed Cleavages
	High	APILIATDVASR	2	8	2	B4DLW8;Q92841-1		0	1.5062e+06	1.07723	1		0	6.452e-05	57.39	0.000222698	2	1226.71	0.79074	37.3202	0
	High	APILIATDVASr	3	8	2	B4DLW8;Q92841-1	R12(Arg10)	0	1.27988e+06	1.04739	2	14.7264	0	0.0003706	48.59	0.00188165	2	1236.72	0.908744	37.3084	0
	High	GDGPIcLVLAPTr	2	8	2	B4DLW8;Q92841-1	C6(Carbamidomethyl); R13(Arg10)	0	344502	1.01137	2	32.4665	0	0.001404	18.04	3.87487	2	1378.74	0.584049	44.9629	0
	High	TGTAYTFFTPNNIk	1	3	1	B4DLW8	K14(Lys8)	0	0				0.004	0.02734	10.01	35.6578	2	1582.8	-0.655168	43.0335	0
Q92841-1	Isoform 2 of Probable ATP-dependent RNA helicase DDX17 OS=Homo sapiens GN=DDX17 - [DDX17_HUMAN]	117.389	6.15	5	1	3	8	925351	1.07723	5	18.9802	650	72.326	8.5874
	A2	Sequence	# PSMs	# Proteins	# Protein Groups	Protein Group Accessions	Modifications	ΔCn	Area	Light/Heavy	Light/Heavy Count	Light/Heavy Variability [%]	q-Value	PEP	IonScore	Exp Value	Charge	MH+ [Da]	ΔM [ppm]	RT [min]	# Missed Cleavages
	High	APILIATDVASR	2	8	2	B4DLW8;Q92841-1		0	1.5062e+06	1.07723	1		0	6.452e-05	57.39	0.000222698	2	1226.71	0.79074	37.3202	0
	High	APILIATDVASr	3	8	2	B4DLW8;Q92841-1	R12(Arg10)	0	1.27988e+06	1.04739	2	14.7264	0	0.0003706	48.59	0.00188165	2	1236.72	0.908744	37.3084	0
	High	GDGPIcLVLAPTr	2	8	2	B4DLW8;Q92841-1	C6(Carbamidomethyl); R13(Arg10)	0	344502	1.01137	2	32.4665	0	0.001404	18.04	3.87487	2	1378.74	0.584049	44.9629	0
	High	ELAQQVQQVADDYGK	1	5	1	Q92841-1		0	0				0.004	0.02688	15.02	12.506	2	1691.83	3.08048	40.6465	0
D6R9P3	Heterogeneous nuclear ribonucleoprotein A/B OS=Homo sapiens GN=HNRNPAB PE=1 SV=1 - [D6R9P3_HUMAN]	117.28	13.21	6	2	3	10	1.00812e+06	1.4274	7	11.7774	280	30.284	7.91357
	A2	Sequence	# PSMs	# Proteins	# Protein Groups	Protein Group Accessions	Modifications	ΔCn	Area	Light/Heavy	Light/Heavy Count	Light/Heavy Variability [%]	q-Value	PEP	IonScore	Exp Value	Charge	MH+ [Da]	ΔM [ppm]	RT [min]	# Missed Cleavages
	High	IFVGGLNPEATEEK	3	6	1	D6R9P3		0	1.04721e+06	1.48112	2	5.48097	0	5.37e-05	48.49	0.0040605	2	1503.77	1.01353	37.4614	0
	High	FGEVVDcTIk	2	6	2	D6R9P3;D6RAF8	C7(Carbamidomethyl); K10(Lys8)	0	803848	1.33526	2	16.2639	0	0.0004627	42	0.0130198	2	1175.59	-0.271824	32.7378	0
	High	FGEVVDcTIK	1	6	2	D6R9P3;D6RAF8	C7(Carbamidomethyl)	0	962518				0.001	0.004292	31.09	0.161404	2	1167.57	-0.240421	32.7674	0
	High	IFVGGLNPEATEEk	2	6	1	D6R9P3	K14(Lys8)	0	733646	1.59958	1		0.001	0.002591	28.11	0.469062	2	1511.78	-0.39022	38.0649	0
	High	EVYQQQQYGSGGr	2	6	1	D6R9P3	R13(Arg10)	0	1.01463e+06	1.28306	2	4.07017	0.001	0.00358	16.78	5.85709	2	1509.7	0.212063	21.3518	0
A6NNK5	Tumor suppressor p53-binding protein 1 OS=Homo sapiens GN=TP53BP1 PE=1 SV=2 - [A6NNK5_HUMAN]	110.73	6.02	4	7	7	21	1.53173e+06	1.34034	13	15.4182	1927	208.89	4.66553
	A2	Sequence	# PSMs	# Proteins	# Protein Groups	Protein Group Accessions	Modifications	ΔCn	Area	Light/Heavy	Light/Heavy Count	Light/Heavy Variability [%]	q-Value	PEP	IonScore	Exp Value	Charge	MH+ [Da]	ΔM [ppm]	RT [min]	# Missed Cleavages
	High	NsPEDLGLSLTGDSck	2	4	1	A6NNK5	S2(Phospho); C15(Carbamidomethyl); K16(Lys8)	0	990700	1.34034	1		0	0.000176	31.98	0.17761	2	1780.76	1.47282	40.9826	0
	High	NsPEDLGLSLTGDScK	5	4	1	A6NNK5	S2(Phospho); C15(Carbamidomethyl)	0	1.24822e+06	1.17045	2	6.10731	0	0.0008114	31.41	0.169345	2	1772.74	0.124195	40.9701	0
	High	IDEDGENTQIEDTEPmsPVLNSK	4	4	1	A6NNK5	M16(Oxidation); S17(Phospho)	0	1.20161e+06	1.40693	3	12.9637	0	2.553e-05	26.12	1.41866	2	2657.12	0.432236	33.7513	0
	High	mVIQGPSsPQGEAmVTDVLEDQK	2	4	1	A6NNK5	M1(Oxidation); S8(Phospho); M14(Oxidation)	0	1.34205e+06	1.33373	2	24.7208	0	0.0002724	19.92	6.80979	3	2571.14	2.24734	41.9142	0
	High	mVIQGPSsPQGEAmVTDVLEDQk	1	4	1	A6NNK5	M1(Oxidation); S8(Phospho); M14(Oxidation); K23(Lys8)	0	975201				0	0.0006789	16.83	14.2785	3	2579.15	2.01232	41.9327	0
	High	LmLSTSEYsQsPk	1	4	1	A6NNK5	M2(Oxidation); S9(Phospho); S11(Phospho); K13(Lys8)	0	964443	1.20869	1		0.001	0.00441	20.02	1.46474	2	1654.66	0.885466	31.9563	0
	High	IDEDGENTQIEDTEPmsPVLNSk	2	4	1	A6NNK5	M16(Oxidation); S17(Phospho); K23(Lys8)	0	370166				0.001	0.01384	19.74	7.21581	2	2665.15	6.55389	34.1419	0
	High	STPFIVPsSPTEQEGR	2	4	1	A6NNK5	S8(Phospho)	0	1.34645e+06	1.79513	2	14.59	0.001	0.01205	17.53	6.4999	2	1811.82	1.4835	38.3233	0
	High	mVIQGPsSPQGEAmVTDVLEDQKEGR	1	4	1	A6NNK5	M1(Oxidation); S7(Phospho); M14(Oxidation)	0	1.90671e+06	1.28249	1		0.005	0.03941	17.44	15.6042	3	2913.3	1.34497	40.7357	1
	High	SGTAETEPVEQDSsQPSLPLVR	1	4	1	A6NNK5	S14(Phospho)	0	1.00345e+06	1.43626	1		0.009	0.07729	10.41	61.0233	2	2407.11	1.22722	40.4172	0
P07437	Tubulin beta chain OS=Homo sapiens GN=TUBB PE=1 SV=2 - [TBB5_HUMAN]	110.096	20.95	2	7	7	22	2.21894e+06	1.18318	13	28.4813	444	49.639	4.89404
	A2	Sequence	# PSMs	# Proteins	# Protein Groups	Protein Group Accessions	Modifications	ΔCn	Area	Light/Heavy	Light/Heavy Count	Light/Heavy Variability [%]	q-Value	PEP	IonScore	Exp Value	Charge	MH+ [Da]	ΔM [ppm]	RT [min]	# Missed Cleavages
	High	ISVYYNEATGGK	3	2	1	P07437		0	1.93789e+06	1.04192	3	3.31684	0	0.001208	49.49	0.0026372	2	1301.64	1.04184	29.5275	0
	High	LAVNmVPFPR	1	2	1	P07437	M5(Oxidation)	0	1.42709e+06	1.55581	1		0	1.255e-05	46.76	0.00414662	2	1159.63	-0.190044	39.8183	0
	High	AILVDLEPGTmDSVR	3	2	1	P07437	M11(Oxidation)	0	2.94759e+06	2.55881	1		0	0.0009314	35.54	0.0950582	2	1631.83	1.71067	41.3614	0
	High	ImNTFSVVPSPK	1	2	1	P07437	M2(Oxidation)	0	1.77134e+06	2.1365	1		0	0.0003379	32.24	0.142154	2	1335.69	-2.4412	35.6863	0
	High	AILVDLEPGTmDSVr	5	2	1	P07437	M11(Oxidation); R15(Arg10)	0	1.14057e+06	2.3127	2	14.7688	0	0.0007168	29.76	0.36196	2	1641.84	-0.362188	41.408	0
	High	ISVYYNEATGGk	2	2	1	P07437	K12(Lys8)	0	1.63786e+06				0	6.586e-05	26.03	0.60918	2	1309.65	0.726184	29.5123	0
	High	LAVNmVPFPr	1	2	1	P07437	M5(Oxidation); R10(Arg10)	0	1.00275e+06				0	0.0002347	21.57	1.40126	2	1169.64	-0.474344	39.8263	0
	High	ALTVPELTQQVFDAk	1	2	1	P07437	K15(Lys8)	0	721726	1.60452	1		0	0.0006867	18.7	3.70762	2	1667.91	1.74518	52.1059	0
	High	EIVHIQAGQcGNQIGAK	2	1	1	P07437	C10(Carbamidomethyl)	0	1.04772e+06	1.02595	2	6.79556	0	0.0001508	14.65	15.0664	3	1822.93	1.41801	29.3277	0
	High	EVDEQmLNVQNK	1	2	1	P07437	M6(Oxidation)	0	1.20853e+06	1.0921	1		0	0.001398	14.41	9.84758	2	1462.69	0.713778	24.9393	0
	High	EIVHIQAGQcGNQIGAk	1	1	1	P07437	C10(Carbamidomethyl); K17(Lys8)	0	944089				0	0.001103	13.82	17.9551	3	1830.94	0.490532	29.3339	0
	High	EVDEQmLNVQNk	1	2	1	P07437	M6(Oxidation); K12(Lys8)	0	1.08859e+06	1.10224	1		0.007	0.06214	19.96	2.97578	2	1470.7	0.932481	24.2998	0
Q9UKM9-2	Isoform 1 of RNA-binding protein Raly OS=Homo sapiens GN=RALY - [RALY_HUMAN]	100.88	14.48	2	3	3	10	6.24295e+06	1.1759	7	3.20098	290	30.3458	9.62744
	A2	Sequence	# PSMs	# Proteins	# Protein Groups	Protein Group Accessions	Modifications	ΔCn	Area	Light/Heavy	Light/Heavy Count	Light/Heavy Variability [%]	q-Value	PEP	IonScore	Exp Value	Charge	MH+ [Da]	ΔM [ppm]	RT [min]	# Missed Cleavages
	High	TRDDGDEEGLLTHsEEELEHSQDTDADDGALQ	3	2	1	Q9UKM9-2	S14(Phospho)	0	1.28401e+07	1.15713	2	5.59035	0	0.0001544	47.8	0.0120627	3	3607.45	1.81453	37.1937	1
	High	TrDDGDEEGLLTHsEEELEHSQDTDADDGALQ	4	2	1	Q9UKM9-2	R2(Arg10); S14(Phospho)	0	1.04057e+07	1.1759	3	0.436477	0	0.0001287	44.31	0.0282829	3	3617.46	1.58208	37.2003	1
	High	DDGDEEGLLtHSEEELEHSQDTDADDGALQ	1	2	1	Q9UKM9-2	T10(Phospho)	0	1.39371e+06				0.001	0.006986	12.63	27.4598	3	3350.3	0.495267	39.4678	0
	High	GrLsPVPVPr	1	2	1	Q9UKM9-2	R2(Arg10); S4(Phospho); R10(Arg10)	0	4.49502e+06	1.60297	1		0.003	0.02477	30.18	0.185404	2	1177.64	0.20512	29.7107	1
	High	TrDDGDEEGLLtHSEEELEHSQDtDADDGALQ	1	2	1	Q9UKM9-2	R2(Arg10); T12(Phospho); T24(Phospho)	0	5.4205e+06	0.90252	1		0.008	0.06974	16.89	11.543	3	3697.43	2.00401	37.6496	1
P61978-3	Isoform 3 of Heterogeneous nuclear ribonucleoprotein K OS=Homo sapiens GN=HNRNPK - [HNRPK_HUMAN]	95.3933	10.68	3	3	3	15	1.46419e+06	1.21339	8	6.4272	440	48.5322	5.5415
	A2	Sequence	# PSMs	# Proteins	# Protein Groups	Protein Group Accessions	Modifications	ΔCn	Area	Light/Heavy	Light/Heavy Count	Light/Heavy Variability [%]	q-Value	PEP	IonScore	Exp Value	Charge	MH+ [Da]	ΔM [ppm]	RT [min]	# Missed Cleavages
	High	TDYNASVSVPDSSGPER	3	3	1	P61978-3		0	1.76239e+06	1.18243	3	0.252211	0	0.000392	30.35	0.323131	2	1780.8	1.5239	29.8096	0
	High	GSYGDLGGPIITTQVTIPK	3	3	1	P61978-3		0	1.28651e+06	1.24515	3	7.48936	0	6.133e-05	29.87	0.327096	2	1917.03	0.526738	46.7862	0
	High	TDYNASVSVPDSSGPEr	3	3	1	P61978-3	R17(Arg10)	0	1.47245e+06				0	0.0008045	28.28	0.547047	2	1790.81	1.12414	30.2831	0
	High	GSYGDLGGPIITTQVTIPk	4	3	1	P61978-3	K19(Lys8)	0	1.07621e+06				0	0.000327	27.24	0.544686	2	1925.05	1.07507	46.78	0
	High	IDEPLEGSEDR	2	3	1	P61978-3		0	1.34366e+06	1.17057	2	12.0406	0.002	0.02156	28.69	0.268048	2	1259.58	1.39612	25.8731	0
C9J0A5	E3 ubiquitin-protein ligase BRE1A (Fragment) OS=Homo sapiens GN=RNF20 PE=1 SV=1 - [C9J0A5_HUMAN]	92.7357	12.41	3	2	2	9	2.41429e+06	1.35438	5	21.218	145	16.3824	4.85596
	A2	Sequence	# PSMs	# Proteins	# Protein Groups	Protein Group Accessions	Modifications	ΔCn	Area	Light/Heavy	Light/Heavy Count	Light/Heavy Variability [%]	q-Value	PEP	IonScore	Exp Value	Charge	MH+ [Da]	ΔM [ppm]	RT [min]	# Missed Cleavages
	High	ALVVPEPEPDSDsNQEr	3	3	1	C9J0A5	S13(Phospho); R17(Arg10)	0	3.02111e+06	1.35438	1		0	5.037e-05	48.51	0.00551032	2	1971.86	0.0274021	34.2731	0
	High	ALVVPEPEPDSDsNQER	4	3	1	C9J0A5	S13(Phospho)	0	4.17721e+06	1.44218	2	11.9611	0	0.0002837	43.69	0.0168417	2	1961.85	0.509119	34.7034	0
	High	KALVVPEPEPDsDSNQER	2	3	1	C9J0A5	S12(Phospho)	0	651367	1.51511	2	38.9817	0.001	0.007523	21.84	3.32915	2	2089.95	2.34731	30.0482	1
Q9H0D6-2	Isoform 2 of 5'-3' exoribonuclease 2 OS=Homo sapiens GN=XRN2 - [XRN2_HUMAN]	90.4633	3.2	2	2	2	6	2.18626e+06	1.23494	4	3.2712	874	99.8981	8.01611
	A2	Sequence	# PSMs	# Proteins	# Protein Groups	Protein Group Accessions	Modifications	ΔCn	Area	Light/Heavy	Light/Heavy Count	Light/Heavy Variability [%]	q-Value	PEP	IonScore	Exp Value	Charge	MH+ [Da]	ΔM [ppm]	RT [min]	# Missed Cleavages
	High	NsPGSQVASNPR	1	2	1	Q9H0D6-2	S2(Phospho)	0	2.22707e+06	1.07669	1		0	0.0004517	54.23	0.00054899	2	1293.56	0.113623	17.7831	0
	High	KAEDsDsEPEPEDNVR	3	2	1	Q9H0D6-2	S5(Phospho); S7(Phospho)	0	2.14545e+06	1.25543	2	3.2712	0	0.0002492	29.43	0.137343	2	1976.72	1.89141	21.847	1
	High	kAEDsDsEPEPEDNVr	2	2	1	Q9H0D6-2	K1(Lys8); S5(Phospho); S7(Phospho); R16(Arg10)	0	1.68371e+06	1.24188	1		0.001	0.0122	35.71	0.0363059	2	1994.74	1.626	22.477	1
Q9Y2W1	Thyroid hormone receptor-associated protein 3 OS=Homo sapiens GN=THRAP3 PE=1 SV=2 - [TR150_HUMAN]	82.0533	5.86	1	4	4	7	4.41017e+06	1.04513	5	12.4597	955	108.601	10.1548
	A2	Sequence	# PSMs	# Proteins	# Protein Groups	Protein Group Accessions	Modifications	ΔCn	Area	Light/Heavy	Light/Heavy Count	Light/Heavy Variability [%]	q-Value	PEP	IonScore	Exp Value	Charge	MH+ [Da]	ΔM [ppm]	RT [min]	# Missed Cleavages
	High	FSGEEGEIEDDEsGTENR	1	1	1	Q9Y2W1	S13(Phospho)	0	1.06592e+06	1.04513	1		0	0.000661	41.83	0.00899575	2	2079.77	-0.0968474	28.0965	0
	High	ASAVSELsPR	1	1	1	Q9Y2W1	S8(Phospho)	0	1.24558e+06	1.01228	1		0	0.002043	40.73	0.0113056	2	1096.5	-0.349241	26.1743	0
	High	ERsPALKsPLQSVVVR	1	1	1	Q9Y2W1	S3(Phospho); S8(Phospho)	0	1.0919e+07	1.32895	1		0	0.0001051	28.5	0.658808	3	1925.96	0.628304	36.5691	2
	High	FSGEEGEIEDDEsGTENr	1	1	1	Q9Y2W1	S13(Phospho); R18(Arg10)	0	946470				0	0.0002598	20.85	1.09811	2	2089.78	1.43756	28.103	0
	High	ASAVSELsPr	2	1	1	Q9Y2W1	S8(Phospho); R10(Arg10)	0	1.23047e+06	1.13639	1		0.001	0.01743	27.54	0.267204	2	1106.51	0.45488	26.157	0
	High	GSFsDTGLGDGk	1	1	1	Q9Y2W1	S4(Phospho); K12(Lys8)	0	906988	0.716905	1		0.008	0.06999	10.08	10.6961	2	1228.5	0.70431	28.9442	0
Q9NWH9	SAFB-like transcription modulator OS=Homo sapiens GN=SLTM PE=1 SV=2 - [SLTM_HUMAN]	81.6	4.74	1	4	4	13	1.05022e+07	1.01564	8	17.391	1034	117.079	7.86963
	A2	Sequence	# PSMs	# Proteins	# Protein Groups	Protein Group Accessions	Modifications	ΔCn	Area	Light/Heavy	Light/Heavy Count	Light/Heavy Variability [%]	q-Value	PEP	IonScore	Exp Value	Charge	MH+ [Da]	ΔM [ppm]	RT [min]	# Missed Cleavages
	High	DGQDAIAQsPEk	2	1	1	Q9NWH9	S9(Phospho); K12(Lys8)	0	2.07931e+07	1.02697	2	0.76051	0	0.001122	44.4	0.00557869	2	1346.57	0.543546	19.5952	0
	High	DGQDAIAQsPEKESK	1	1	1	Q9NWH9	S9(Phospho)	0	3.10333e+06	1.00959	1		0	0.001445	28.13	0.428222	2	1682.73	0.866957	19.9276	1
	High	ISsKsPGHmVILDQTK	2	1	1	Q9NWH9	S3(Phospho); S5(Phospho); M9(Oxidation)	0	6.0115e+06	0.852088	1		0	0.0001733	27.18	0.817196	3	1916.86	1.16903	27.1969	1
	High	AGAGmITQHSSNAsPINR	2	1	1	Q9NWH9	M5(Oxidation); S14(Phospho)	0	1.90296e+06	1.30939	2	0.418646	0.001	0.01352	26.36	0.875926	2	1907.85	1.10233	22.796	0
	High	IsSksPGHmVILDQTk	3	1	1	Q9NWH9	S2(Phospho); K4(Lys8); S5(Phospho); M9(Oxidation); K16(Lys8)	0	7.11462e+06	0.904013	2	5.75707	0.001	0.006424	19.88	4.63944	3	1932.89	0.456025	27.1594	1
	High	DGQDAIAQsPEK	2	1	1	Q9NWH9	S9(Phospho)	0	2.12887e+07				0.002	0.02181	34.15	0.0530544	2	1338.56	0.575819	19.9106	0
	High	DGQDAIAQSPEkEsk	1	1	1	Q9NWH9	K12(Lys8); S14(Phospho); K15(Lys8)	0	3.07384e+06				0.005	0.03537	16.12	7.06396	2	1698.76	1.2442	19.9189	1
Q9H3N1	Thioredoxin-related transmembrane protein 1 OS=Homo sapiens GN=TMX1 PE=1 SV=1 - [TMX1_HUMAN]	77.04	7.5	1	2	2	8	649196	0.916322	4	6.0415	280	31.7708	4.98291
	A2	Sequence	# PSMs	# Proteins	# Protein Groups	Protein Group Accessions	Modifications	ΔCn	Area	Light/Heavy	Light/Heavy Count	Light/Heavy Variability [%]	q-Value	PEP	IonScore	Exp Value	Charge	MH+ [Da]	ΔM [ppm]	RT [min]	# Missed Cleavages
	High	VEEEQEADEEDVsEEEAESK	3	1	1	Q9H3N1	S13(Phospho)	0	1.2067e+06	1.10683	2	25.3657	0	0.0008462	44.5	0.0073198	2	2389.9	2.70104	26.8132	0
	High	VEEEQEADEEDVsEEEAESk	4	1	1	Q9H3N1	S13(Phospho); K20(Lys8)	0	1.01457e+06	0.897765	1		0	0.000955	26.51	0.54957	2	2397.92	5.42477	26.3796	0
	High	KVEEEQEADEEDVsEEEAESK	1	1	1	Q9H3N1	S14(Phospho)	0	91692.9	0.862127	1		0.002	0.02207	26.28	0.787057	2	2517.99	-0.247878	24.8336	1
P07900	Heat shock protein HSP 90-alpha OS=Homo sapiens GN=HSP90AA1 PE=1 SV=5 - [HS90A_HUMAN]	74.88	6.01	2	1	3	7	1.22162e+06	0.893934	5	11.8564	732	84.6067	5.021
	A2	Sequence	# PSMs	# Proteins	# Protein Groups	Protein Group Accessions	Modifications	ΔCn	Area	Light/Heavy	Light/Heavy Count	Light/Heavy Variability [%]	q-Value	PEP	IonScore	Exp Value	Charge	MH+ [Da]	ΔM [ppm]	RT [min]	# Missed Cleavages
	High	ADLINNLGTIAK	3	3	2	P07900;P08238		0	1.55832e+06	0.87725	3	2.79375	0	5.996e-05	37.26	0.0312624	2	1242.71	0.259679	41.9598	0
	High	TLTIVDTGIGmTk	1	2	2	P07900;P08238	M11(Oxidation); K13(Lys8)	0	685399	1.54886	1		0	0.0002459	31.32	0.180344	2	1373.74	0.647234	38.6091	0
	High	ADLINNLGTIAk	2	3	2	P07900;P08238	K12(Lys8)	0	1.81218e+06				0.001	0.003547	28.62	0.1969	2	1250.72	-1.13944	41.4133	0
	High	ESEDKPEIEDVGsDEEEEK	1	2	1	P07900	S13(Phospho)	0	1.16728e+06	1.53457	1		0.005	0.0358	14.1	9.64443	2	2272.89	1.8128	28.0092	0
A0A087WV66	Antigen KI-67 OS=Homo sapiens GN=MKI67 PE=1 SV=1 - [A0A087WV66_HUMAN]	68.91	1.11	2	2	2	8	3.35796e+06	1.34389	3	7.27798	3255	358.407	9.42236
	A2	Sequence	# PSMs	# Proteins	# Protein Groups	Protein Group Accessions	Modifications	ΔCn	Area	Light/Heavy	Light/Heavy Count	Light/Heavy Variability [%]	q-Value	PEP	IonScore	Exp Value	Charge	MH+ [Da]	ΔM [ppm]	RT [min]	# Missed Cleavages
	High	SGGSGHAVAEPAsPEQELDQNK	4	2	1	A0A087WV66	S13(Phospho)	0	3.88409e+06	1.27769	1		0	0.0001583	30.53	0.412818	2	2287.98	-0.243431	28.7049	0
	High	SGGSGHAVAEPAsPEQELDQNk	3	2	1	A0A087WV66	S13(Phospho); K22(Lys8)	0	2.77578e+06	1.34389	1		0	0.0002344	27.91	0.819153	2	2296	2.18616	28.659	0
	High	TPVQYSQQQNsPQk	1	2	1	A0A087WV66	S11(Phospho); K14(Lys8)	0	2.83184e+06	1.41141	1		0.006	0.05137	10.05	32.296	2	1720.78	0.882963	20.7083	0
Q5VT52-5	Isoform 5 of Regulation of nuclear pre-mRNA domain-containing protein 2 OS=Homo sapiens GN=RPRD2 - [RPRD2_HUMAN]	65.87	4.93	4	2	2	7	1.5736e+06	1.02082	4	10.561	934	100.21	6.48096
	A2	Sequence	# PSMs	# Proteins	# Protein Groups	Protein Group Accessions	Modifications	ΔCn	Area	Light/Heavy	Light/Heavy Count	Light/Heavy Variability [%]	q-Value	PEP	IonScore	Exp Value	Charge	MH+ [Da]	ΔM [ppm]	RT [min]	# Missed Cleavages
	High	SFNYsPNSSTSEVSSTSASk	3	4	1	Q5VT52-5	S5(Phospho); K20(Lys8)	0	2.13677e+06	1.08779	1		0	6.777e-05	42.39	0.0204464	2	2154.9	0.940758	31.5598	0
	High	SFNYsPNSSTSEVSSTSASK	3	4	1	Q5VT52-5	S5(Phospho)	0	2.44809e+06	1.05336	2	14.1429	0	6.223e-05	25.51	0.912602	2	2146.88	0.166332	31.0618	0
	High	NTGVSPASrPSPGTPTsPSNLTSGLk	1	4	1	Q5VT52-5	R9(Arg10); S17(Phospho); K26(Lys8)	0	699108	0.943725	1		0.005	0.04602	10.11	72.3345	3	2608.28	0.64767	35.6305	0
O75475-3	Isoform 3 of PC4 and SFRS1-interacting protein OS=Homo sapiens GN=PSIP1 - [PSIP1_HUMAN]	65.7867	10.03	3	2	2	6	7.7862e+06	1.31281	4	5.25584	329	37.2451	9.23193
	A2	Sequence	# PSMs	# Proteins	# Protein Groups	Protein Group Accessions	Modifications	ΔCn	Area	Light/Heavy	Light/Heavy Count	Light/Heavy Variability [%]	q-Value	PEP	IonScore	Exp Value	Charge	MH+ [Da]	ΔM [ppm]	RT [min]	# Missed Cleavages
	High	TGVTSTsDsEEEGDDQEGEk	3	3	1	O75475-3	S7(Phospho); S9(Phospho); K20(Lys8)	0	2.97409e+06	1.3194	3	1.48493	0	5.086e-05	38.35	0.013686	2	2267.79	1.79525	21.2887	0
	High	TGVTSTsDsEEEGDDQEGEK	2	3	1	O75475-3	S7(Phospho); S9(Phospho)	0	3.90404e+06				0	0.0009468	22.13	0.563975	2	2259.77	0.846464	21.2605	0
	High	QSNASsDVEVEEK	1	3	1	O75475-3	S6(Phospho)	0	1.16684e+07	0.968248	1		0.001	0.005774	28.68	0.188981	2	1501.61	1.01817	21.6107	0
O95218-2	Isoform 2 of Zinc finger Ran-binding domain-containing protein 2 OS=Homo sapiens GN=ZRANB2 - [ZRAB2_HUMAN]	64.4896	4.38	3	2	2	6	1.97462e+06	1.02432	4	1.30291	320	36.2965	9.75928
	A2	Sequence	# PSMs	# Proteins	# Protein Groups	Protein Group Accessions	Modifications	ΔCn	Area	Light/Heavy	Light/Heavy Count	Light/Heavy Variability [%]	q-Value	PEP	IonScore	Exp Value	Charge	MH+ [Da]	ΔM [ppm]	RT [min]	# Missed Cleavages
	High	YNLDAsEEEDSNK	3	3	1	O95218-2	S6(Phospho)	0	2.78313e+06	1.02303	3	0.374009	0	0.001619	42.17	0.00617961	2	1593.6	0.91302	26.2543	0
	High	YNLDAsEEEDSNk	2	3	1	O95218-2	S6(Phospho); K13(Lys8)	0	2.74116e+06				0	0.0005055	29.25	0.138995	2	1601.61	-0.0304077	25.7098	0
	High	YNLDAsEEEDSNkk	1	3	1	O95218-2	S6(Phospho); K13(Lys8); K14(Lys8)	0	1.1661e+06	1.04117	1		0.007	0.06144	18.63	2.90079	2	1737.72	0.792994	23.2854	1
P35527	Keratin, type I cytoskeletal 9 OS=Homo sapiens GN=KRT9 PE=1 SV=3 - [K1C9_HUMAN]	59.1033	6.26	1	2	2	4	3.07361e+06	100	3	0	623	62.0268	5.23682
	A2	Sequence	# PSMs	# Proteins	# Protein Groups	Protein Group Accessions	Modifications	ΔCn	Area	Light/Heavy	Light/Heavy Count	Light/Heavy Variability [%]	q-Value	PEP	IonScore	Exp Value	Charge	MH+ [Da]	ΔM [ppm]	RT [min]	# Missed Cleavages
	High	SGGGGGGGLGSGGSIR	2	1	1	P35527		0	4.40907e+06	100	2	0	0	2.297e-05	35.71	0.0531832	2	1232.6	-0.350148	20.3643	0
	High	GGSGGSYGGGGSGGGYGGGSGSR	2	1	1	P35527		0	1.73814e+06	100	1		0	0.0001465	22.37	1.27561	2	1791.73	0.493375	16.8542	0
O60832	H/ACA ribonucleoprotein complex subunit 4 OS=Homo sapiens GN=DKC1 PE=1 SV=3 - [DKC1_HUMAN]	57.8733	3.7	1	2	2	6	8.67724e+06	1.02832	4	0.744877	514	57.6378	9.42236
	A2	Sequence	# PSMs	# Proteins	# Protein Groups	Protein Group Accessions	Modifications	ΔCn	Area	Light/Heavy	Light/Heavy Count	Light/Heavy Variability [%]	q-Value	PEP	IonScore	Exp Value	Charge	MH+ [Da]	ΔM [ppm]	RT [min]	# Missed Cleavages
	High	AGLESGAEPGDGDsDTTk	3	1	1	O60832	S14(Phospho); K18(Lys8)	0	1.33256e+07	1.0297	2	0.744877	0	0.0003012	37.83	0.0322875	2	1794.72	1.21011	23.6885	0
	High	AGLESGAEPGDGDsDTTkk	1	1	1	O60832	S14(Phospho); K18(Lys8); K19(Lys8)	0	3.65088e+06	1.0321	1		0	0.001372	34.4	0.12027	2	1930.83	0.978609	21.3973	1
	High	AGLESGAEPGDGDsDTTK	2	1	1	O60832	S14(Phospho)	0	1.37036e+07	0.988707	1		0.001	0.003108	24.31	0.64517	2	1786.7	1.10064	23.0597	0
Q13547	Histone deacetylase 1 OS=Homo sapiens GN=HDAC1 PE=1 SV=1 - [HDAC1_HUMAN]	56.6843	10.79	1	3	3	19	5.63578e+06	1.26628	12	40.2853	482	55.0677	5.47803
	A2	Sequence	# PSMs	# Proteins	# Protein Groups	Protein Group Accessions	Modifications	ΔCn	Area	Light/Heavy	Light/Heavy Count	Light/Heavy Variability [%]	q-Value	PEP	IonScore	Exp Value	Charge	MH+ [Da]	ΔM [ppm]	RT [min]	# Missed Cleavages
	High	IAcEEEFsDsEEEGEGGrk	3	1	1	Q13547	C3(Carbamidomethyl); S8(Phospho); S10(Phospho); R18(Arg10); K19(Lys8)	0	3.06537e+06	0.928141	2	3.8738	0	0.0006988	33.3	0.0671434	2	2335.85	1.93266	27.0395	1
	High	mLPHAPGVQmQAIPEDAIPEEsGDEDEDDPDkr	4	1	1	Q13547	M1(Oxidation); M10(Oxidation); S22(Phospho); K32(Lys8); R33(Arg10)	0	6.29252e+06	1.7067	2	7.82182	0	0.0004174	32.19	0.627593	3	3761.6	1.99222	37.8854	1
	High	mLPHAPGVQmQAIPEDAIPEEsGDEDEDDPDKR	7	1	1	Q13547	M1(Oxidation); M10(Oxidation); S22(Phospho)	0	1.16602e+07	1.69594	4	8.30313	0	0.0003057	30.93	0.770546	3	3743.57	-1.97447	38.0576	1
	High	IAcEEEFsDsEEEGEGGR	3	1	1	Q13547	C3(Carbamidomethyl); S8(Phospho); S10(Phospho)	0	2.08371e+06	1.10075	3	3.05935	0	0.0008304	22.83	0.352328	2	2189.73	2.73349	29.5576	0
	High	IAcEEEFsDsEEEGEGGRK	2	1	1	Q13547	C3(Carbamidomethyl); S8(Phospho); S10(Phospho)	0	3163384	1.03197	1		0.001	0.005247	21.2	0.900811	2	2317.83	2.58273	27.0332	1
P35579-2	Isoform 2 of Myosin-9 OS=Homo sapiens GN=MYH9 - [MYH9_HUMAN]	56.49	1.74	2	2	2	3	1.61806e+07	3.59408	3	9.15005	1382	159.764	5.97314
	A2	Sequence	# PSMs	# Proteins	# Protein Groups	Protein Group Accessions	Modifications	ΔCn	Area	Light/Heavy	Light/Heavy Count	Light/Heavy Variability [%]	q-Value	PEP	IonScore	Exp Value	Charge	MH+ [Da]	ΔM [ppm]	RT [min]	# Missed Cleavages
	High	KGAGDGsDEEVDGKADGAEAKPAE	1	2	1	P35579-2	S7(Phospho)	0	2.86075e+07	3.82239	1		0	1.078e-05	36.19	0.112572	3	2383	3.32548	21.0209	2
	High	kGAGDGsDEEVDGk	1	2	1	P35579-2	K1(Lys8); S7(Phospho); K14(Lys8)	0	3.75384e+06	1.15591	1		0.001	0.01293	38.63	0.0195008	2	1459.59	0.973619	15.3082	1
	High	kGAGDGsDEEVDGkADGAEAkPAE	1	2	1	P35579-2	K1(Lys8); S7(Phospho); K14(Lys8); K21(Lys8)	0	7.53659e+06	3.59408	1		0.005	0.04349	19.67	5.7605	3	2407.04	0.885663	20.3638	2
H7C1L2	Splicing factor 3A subunit 1 (Fragment) OS=Homo sapiens GN=SF3A1 PE=1 SV=1 - [H7C1L2_HUMAN]	56.32	19.69	3	2	2	5	5.69984e+06	1.01481	4	4.05759	259	28.6162	4.64014
	A2	Sequence	# PSMs	# Proteins	# Protein Groups	Protein Group Accessions	Modifications	ΔCn	Area	Light/Heavy	Light/Heavy Count	Light/Heavy Variability [%]	q-Value	PEP	IonScore	Exp Value	Charge	MH+ [Da]	ΔM [ppm]	RT [min]	# Missed Cleavages
	High	AEEPPSQLDQDTQVQDmDEGsDDEEEGQK	1	3	1	H7C1L2	M17(Oxidation); S21(Phospho)	0	4.84801e+06	1.45876	1		0	0.00051	32.69	0.21703	3	3345.27	-2.39521	30.3286	0
	High	FGESEEVEmEVEsDEEDDKQEK	3	3	1	H7C1L2	M9(Oxidation); S13(Phospho)	0	6.55168e+06	0.988197	3	0.230928	0	0.0003889	22.96	1.34802	3	2713.03	1.69435	35.1026	1
	High	FGESEEVEmEVEsDEEDDkQEk	1	3	1	H7C1L2	M9(Oxidation); S13(Phospho); K19(Lys8); K22(Lys8)	0	6.28671e+06				0.001	0.01493	14.19	12.8152	3	2729.05	0.314034	34.6655	1
H0Y400	Spliceosome RNA helicase DDX39B (Fragment) OS=Homo sapiens GN=DDX39B PE=1 SV=1 - [H0Y400_HUMAN]	53.0467	12.83	4	2	2	3	742519	2.01475	3	73.1156	187	21.7761	5.12256
	A2	Sequence	# PSMs	# Proteins	# Protein Groups	Protein Group Accessions	Modifications	ΔCn	Area	Light/Heavy	Light/Heavy Count	Light/Heavy Variability [%]	q-Value	PEP	IonScore	Exp Value	Charge	MH+ [Da]	ΔM [ppm]	RT [min]	# Missed Cleavages
	High	ILVATNLFGR	1	4	1	H0Y400		0	478286	0.560978	1		0	7.959e-05	52.94	0.000527215	2	1103.66	-0.496069	45.0652	0
	High	GLAITFVSDENDAK	2	4	1	H0Y400		0	1006752	2.51229	2	33.6166	0.001	0.003229	21.78	2.11037	2	1479.74	1.61627	40.2374	0
P49736	DNA replication licensing factor MCM2 OS=Homo sapiens GN=MCM2 PE=1 SV=4 - [MCM2_HUMAN]	51.04	2.99	1	2	2	9	1.96484e+06	1.24303	6	7.29977	904	101.832	5.51611
	A2	Sequence	# PSMs	# Proteins	# Protein Groups	Protein Group Accessions	Modifications	ΔCn	Area	Light/Heavy	Light/Heavy Count	Light/Heavy Variability [%]	q-Value	PEP	IonScore	Exp Value	Charge	MH+ [Da]	ΔM [ppm]	RT [min]	# Missed Cleavages
	High	GNDPLTsSPGR	3	1	1	P49736	S7(Phospho)	0	2.53614e+06	1.30255	3	0.71204	0.001	0.009998	28.12	0.165733	2	1180.5	0.0821834	23.2791	0
	High	GLLYDsDEEDEErPAr	3	1	1	P49736	S6(Phospho); R13(Arg10); R16(Arg10)	0	1.26827e+06	1.13754	3	13.9486	0.001	0.006381	26.58	0.670127	2	1993.83	1.21284	32.6491	0
	High	GLLYDsDEEDEERPAR	3	1	1	P49736	S6(Phospho)	0	1.39355e+06				0.001	0.007432	18.43	4.27273	2	1973.82	1.44032	32.6871	0
Q12906-4	Isoform 4 of Interleukin enhancer-binding factor 3 OS=Homo sapiens GN=ILF3 - [ILF3_HUMAN]	43.35	6.45	3	2	2	8	1.13227e+07	1.76445	6	8.69508	698	75.4608	8.41162
	A2	Sequence	# PSMs	# Proteins	# Protein Groups	Protein Group Accessions	Modifications	ΔCn	Area	Light/Heavy	Light/Heavy Count	Light/Heavy Variability [%]	q-Value	PEP	IonScore	Exp Value	Charge	MH+ [Da]	ΔM [ppm]	RT [min]	# Missed Cleavages
	High	GEDsAEETEAKPAVVAPAPVVEAVSTPSAAFPSDATAENVK	3	3	1	Q12906-4	S4(Phospho)	0	9.11503e+06	1.77447	3	13.7455	0	9.676e-09	40.28	0.12478	3	4118.94	1.46149	48.6474	0
	High	DSSkGEDSAEEtEAkPAVVAPAPVVEAVSTPSAAFPSDATAENVk	2	3	1	Q12906-4	K4(Lys8); T12(Phospho); K15(Lys8); K45(Lys8)	0	1.35303e+07	1.73288	2	1.83825	0	0.000497	28.57	1.73271	4	4560.17	2.25397	47.0312	1
	High	GEDsAEETEAkPAVVAPAPVVEAVSTPSAAFPSDATAENVk	2	3	1	Q12906-4	S4(Phospho); K11(Lys8); K41(Lys8)	0	5.0866e+06				0	4.854e-05	20.03	12.406	3	4134.96	-1.2199	48.6144	0
	High	DSsKGEDSAEETEAKPAVVAPAPVVEAVSTPSAAFPSDATAENVK	1	3	1	Q12906-4	S3(Phospho)	0	7.00123e+06	2.92425	1		0.001	0.00545	17.47	23.7595	3	4536.13	3.35754	47.5815	1
O00567	Nucleolar protein 56 OS=Homo sapiens GN=NOP56 PE=1 SV=4 - [NOP56_HUMAN]	43.14	6.9	1	3	3	9	3.63913e+06	0.970296	6	20.0296	594	66.0087	9.18799
	A2	Sequence	# PSMs	# Proteins	# Protein Groups	Protein Group Accessions	Modifications	ΔCn	Area	Light/Heavy	Light/Heavy Count	Light/Heavy Variability [%]	q-Value	PEP	IonScore	Exp Value	Charge	MH+ [Da]	ΔM [ppm]	RT [min]	# Missed Cleavages
	High	VVSLSEYr	1	1	1	O00567	R8(Arg10)	0	2.30636e+06	0.951714	1		0	0.001342	41.99	0.0085091	2	962.518	-0.00654014	29.4639	0
	High	EELmSsDLEETAGSTSIPK	3	1	1	O00567	M4(Oxidation); S6(Phospho)	0	1.58504e+06	1.10935	2	8.7302	0	0.001204	22.65	2.01193	2	2119.9	1.61991	37.803	0
	High	EELmSsDLEETAGSTSIPk	2	1	1	O00567	M4(Oxidation); S6(Phospho); K19(Lys8)	0	1.54453e+06	0.98924	1		0.001	0.008646	14.19	15.1855	2	2127.91	-0.12543	37.9475	0
	High	VVSLSEYR	1	1	1	O00567		0	2.23919e+06				0.004	0.0283	27.47	0.214783	2	952.51	0.15226	29.4903	0
	High	EEPVssGPEEAVGk	2	1	1	O00567	S5(Phospho); S6(Phospho); K14(Lys8)	0	7.02599e+06	0.763273	2	7.06564	0.007	0.06096	12.76	7.66688	2	1582.62	0.727327	28.8624	0
S4R3H4	Apoptotic chromatin condensation inducer in the nucleus OS=Homo sapiens GN=ACIN1 PE=1 SV=1 - [S4R3H4_HUMAN]	42.2133	8.5	4	6	6	16	4.10035e+06	1.24017	13	22.7973	1283	145.355	5.99854
	A2	Sequence	# PSMs	# Proteins	# Protein Groups	Protein Group Accessions	Modifications	ΔCn	Area	Light/Heavy	Light/Heavy Count	Light/Heavy Variability [%]	q-Value	PEP	IonScore	Exp Value	Charge	MH+ [Da]	ΔM [ppm]	RT [min]	# Missed Cleavages
	High	SSSISEEKGDsDDEKPR	2	4	1	S4R3H4	S11(Phospho)	0	5.27877e+06	1.09032	2	3.41739	0.001	0.01328	33.56	0.121417	2	1945.8	1.35519	16.3939	1
	High	ELLVSQHTVQLVGGLSPLssPSDTK	3	4	1	S4R3H4	S19(Phospho); S20(Phospho)	0	1.06365e+06	1.41458	3	19.6955	0.001	0.004518	27.77	1.40021	3	2752.32	0.0736356	50.5502	0
	High	GVPAGNsDTEGGQPGr	3	4	1	S4R3H4	S7(Phospho); R16(Arg10)	0	1.3717e+06	1.29045	2	16.4239	0.001	0.00506	19.92	1.99746	2	1588.66	0.925853	19.6994	0
	High	ASLVALPEQTAsEEETPPPLLtK	2	4	1	S4R3H4	S12(Phospho); T22(Phospho)	0	1.2586e+06	2.73633	2	35.5857	0.001	0.008366	19.83	7.51238	3	2581.21	-0.157753	51.1419	0
	High	ELLVSQHTVQLVGGLsPLsSPSDTk	2	4	1	S4R3H4	S16(Phospho); S19(Phospho); K25(Lys8)	0	857664				0.001	0.00864	19.58	8.7677	3	2760.34	2.18205	50.5564	0
	High	LSEGsQPAEEEEDQETPSR	1	4	1	S4R3H4	S5(Phospho)	0	662603	0.980137	1		0.001	0.01157	13.06	14.4215	2	2197.88	2.23453	25.5281	0
	High	TAQVPsPPR	1	4	1	S4R3H4	S6(Phospho)	0	5.39106e+06	1.46666	1		0.002	0.02103	21.41	0.995254	2	1032.49	0.158963	25.1795	0
	High	GVPAGNsDTEGGQPGR	1	4	1	S4R3H4	S7(Phospho)	0	1.63121e+06	1.12108	1		0.002	0.02262	13.63	8.26922	2	1578.66	1.22089	18.8923	0
	High	SSSIsEEkGDSDDEkPr	1	4	1	S4R3H4	S5(Phospho); K8(Lys8); K15(Lys8); R17(Arg10)	0	2.45026e+06	0.971292	1		0.009	0.07692	13.47	15.3352	2	1971.84	0.137789	15.3956	1
Q7Z5K2	Wings apart-like protein homolog OS=Homo sapiens GN=WAPAL PE=1 SV=1 - [WAPL_HUMAN]	42.11	3.03	3	2	2	8	3.61744e+06	1.36342	5	11.9871	1190	132.863	5.43994
	A2	Sequence	# PSMs	# Proteins	# Protein Groups	Protein Group Accessions	Modifications	ΔCn	Area	Light/Heavy	Light/Heavy Count	Light/Heavy Variability [%]	q-Value	PEP	IonScore	Exp Value	Charge	MH+ [Da]	ΔM [ppm]	RT [min]	# Missed Cleavages
	High	VEEESTGDPFGFDsDDESLPVSSK	3	3	1	Q7Z5K2	S14(Phospho)	0	1.02941e+06	1.22326	3	28.587	0	0.000192	35.07	0.149907	2	2653.07	0.52739	46.2612	0
	High	VEEESTGDPFGFDSDDEsLPVSSk	1	3	1	Q7Z5K2	S18(Phospho); K24(Lys8)	0	776082				0.001	0.01439	18.27	7.8251	2	2661.09	2.16261	46.7889	0
	High	rPEsPSEIsPIk	2	3	1	Q7Z5K2	R1(Arg10); S4(Phospho); S9(Phospho); K12(Lys8)	0	4.5514e+06				0.001	0.01177	10.58	22.4652	2	1517.68	0.807032	27.3786	0
	High	RPEsPSEIsPIK	2	3	1	Q7Z5K2	S4(Phospho); S9(Phospho)	0	6.20547e+06	1.37586	2	1.34678	0.003	0.02512	13.51	9.66183	2	1499.66	1.39123	27.3847	0
Q08211	ATP-dependent RNA helicase A OS=Homo sapiens GN=DHX9 PE=1 SV=4 - [DHX9_HUMAN]	41.8067	3.39	1	2	2	6	645251	1.21686	4	25.0489	1270	140.869	6.84424
	A2	Sequence	# PSMs	# Proteins	# Protein Groups	Protein Group Accessions	Modifications	ΔCn	Area	Light/Heavy	Light/Heavy Count	Light/Heavy Variability [%]	q-Value	PEP	IonScore	Exp Value	Charge	MH+ [Da]	ΔM [ppm]	RT [min]	# Missed Cleavages
	High	ELDALDANDELTPLGR	4	1	1	Q08211		0	755405	1.21686	2	22.8687	0	3.763e-05	39.1	0.049629	2	1741.86	-0.129907	44.5301	0
	High	DKDDDGGEDDDANcNLIcGDEYGPETR	1	1	1	Q08211	C14(Carbamidomethyl); C18(Carbamidomethyl)	0	535097	1.45756	1		0	0.0004863	20.47	3.20741	3	3045.16	-0.0441438	35.0492	1
	High	ELDALDANDELTPLGr	1	1	1	Q08211	R16(Arg10)	0	452911	0.83448	1		0	0.001771	17.57	7.28024	2	1751.87	0.167697	45.0786	0
Q14676-4	Isoform 4 of Mediator of DNA damage checkpoint protein 1 OS=Homo sapiens GN=MDC1 - [MDC1_HUMAN]	41.6367	10.51	4	6	6	20	2.81259e+06	1.29274	16	14.6311	1066	116.563	4.91943
	A2	Sequence	# PSMs	# Proteins	# Protein Groups	Protein Group Accessions	Modifications	ΔCn	Area	Light/Heavy	Light/Heavy Count	Light/Heavy Variability [%]	q-Value	PEP	IonScore	Exp Value	Charge	MH+ [Da]	ΔM [ppm]	RT [min]	# Missed Cleavages
	High	SQTTtERDsDTDVEEEELPVENR	4	4	1	Q14676-4	T5(Phospho); S9(Phospho)	0	2.63508e+06	1.16052	3	8.50378	0	0.0007127	25.53	1.12099	3	2839.12	1.91735	33.122	1
	High	SQASmVINSDtDDEEEVsAALTLAHLk	3	4	1	Q14676-4	M5(Oxidation); T11(Phospho); S18(Phospho); K27(Lys8)	0	1.2706e+06	1.02582	3	6.67599	0	7.731e-05	24.9	2.63761	3	3058.31	1.05804	55.4997	0
	High	GPGAPGLAHLQESQAGsDTDVEEGK	3	4	1	Q14676-4	S17(Phospho)	0	2.43593e+06	1.32692	3	2.01617	0	3.391e-05	23.51	3.03403	3	2530.11	0.992181	32.9829	0
	High	GPGAPGLAHLQESQAGsDTDVEEGk	2	4	1	Q14676-4	S17(Phospho); K25(Lys8)	0	1.72176e+06				0	9.143e-06	23.07	3.35235	3	2538.13	0.540892	32.9892	0
	High	GPGAPGLAHLQESQAGSDtDVEEGkAPQAVPLEk	1	4	1	Q14676-4	T19(Phospho); K25(Lys8); K34(Lys8)	0	2.88396e+06	1.30212	1		0	0.0008052	22.62	5.95837	4	3479.67	1.9295	37.9494	1
	High	AQPFGFIDsDtDAEEEr	3	4	1	Q14676-4	S9(Phospho); T11(Phospho); R17(Arg10)	0	906345	1.27383	3	7.47587	0	0.001024	17.96	2.29856	2	2096.78	-0.141071	46.0901	0
	High	GPGAPGLAHLQESQAGsDTDVEEGKAPQAVPLEK	2	4	1	Q14676-4	S17(Phospho)	0	3.36678e+06	1.59812	2	0.0476647	0.001	0.005403	10.97	91.3371	3	3463.64	1.10128	38.0012	1
	High	AQPFGFIDsDtDAEEER	1	4	1	Q14676-4	S9(Phospho); T11(Phospho)	0	1.05084e+06				0.005	0.03838	13.84	5.89006	2	2086.77	1.48094	46.0964	0
	High	AQPFGFIDsDtDAEEERIPATPVVIPmK	1	4	1	Q14676-4	S9(Phospho); T11(Phospho); M27(Oxidation)	0	1.31418e+06	1.28344	1		0.008	0.07542	12.4	58.4388	3	3249.45	1.22614	53.8463	1
P16401	Histone H1.5 OS=Homo sapiens GN=HIST1H1B PE=1 SV=3 - [H15_HUMAN]	41.47	10.18	1	2	2	7	1.10528e+06	1.19063	5	35.6527	226	22.5665	10.9165
	A2	Sequence	# PSMs	# Proteins	# Protein Groups	Protein Group Accessions	Modifications	ΔCn	Area	Light/Heavy	Light/Heavy Count	Light/Heavy Variability [%]	q-Value	PEP	IonScore	Exp Value	Charge	MH+ [Da]	ΔM [ppm]	RT [min]	# Missed Cleavages
	High	ATGPPVSELITK	2	1	1	P16401		0	1.13165e+06	1.54897	2	4.41929	0	0.001116	29.95	0.176419	2	1212.68	0.325055	35.8569	0
	High	ALAAGGYDVEk	2	1	1	P16401	K11(Lys8)	0	1.07891e+06	0.954066	1		0	0.001807	28.79	0.226933	2	1101.57	0.690027	26.2935	0
	High	ALAAGGYDVEK	3	1	1	P16401		0	1.01943e+06	1.04122	2	20.0784	0.001	0.003317	25.74	0.387495	2	1093.55	-0.162413	26.3983	0
Q96KK5	Histone H2A type 1-H OS=Homo sapiens GN=HIST1H2AH PE=1 SV=3 - [H2A1H_HUMAN]	41.3085	27.34	17	3	3	13	5.70408e+06	1.30064	7	18.5936	128	13.8978	10.8872
	A2	Sequence	# PSMs	# Proteins	# Protein Groups	Protein Group Accessions	Modifications	ΔCn	Area	Light/Heavy	Light/Heavy Count	Light/Heavy Variability [%]	q-Value	PEP	IonScore	Exp Value	Charge	MH+ [Da]	ΔM [ppm]	RT [min]	# Missed Cleavages
	High	AGLQFPVGr	3	17	1	Q96KK5	R9(Arg10)	0	9.16417e+06	1.30064	3	6.16093	0	0.0004922	36.88	0.0340801	2	954.54	0.114312	36.5853	0
	High	AGLQFPVGR	3	17	1	Q96KK5		0	1.11351e+07				0	0.0006687	31.04	0.10511	2	944.532	0.404973	36.0313	0
	High	VTIAQGGVLPNIQAVLLPK	3	10	1	Q96KK5		0	443802	1.69418	2	13.3573	0.001	0.01204	23.71	0.154279	2	1931.16	-2.35975	57.6048	0
	High	HLQLAIR	1	17	1	Q96KK5		0	5.53335e+06				0.001	0.01519	13.64	2.57995	2	850.526	0.170724	28.2797	0
	High	HLQLAIr	2	17	1	Q96KK5	R7(Arg10)	0	4.90937e+06	1.13703	2	1.49524	0.002	0.02019	18.64	0.929372	2	860.534	-0.078038	28.1472	0
	High	VTIAQGGVLPNIQAVLLPk	1	10	1	Q96KK5	K19(Lys8)	0	206180				0.006	0.04718	15.97	0.460332	2	1939.19	5.68746	57.7038	0
Q9H307	Pinin OS=Homo sapiens GN=PNN PE=1 SV=4 - [PININ_HUMAN]	40.86	6.14	1	2	2	9	4.08536e+06	1.20257	8	11.3955	717	81.565	7.13721
	A2	Sequence	# PSMs	# Proteins	# Protein Groups	Protein Group Accessions	Modifications	ΔCn	Area	Light/Heavy	Light/Heavy Count	Light/Heavy Variability [%]	q-Value	PEP	IonScore	Exp Value	Charge	MH+ [Da]	ΔM [ppm]	RT [min]	# Missed Cleavages
	High	QQDsQPEEVmDVLEmVENVk	2	1	1	Q9H307	S4(Phospho); M10(Oxidation); M15(Oxidation); K20(Lys8)	0	341968	1.43484	2	5.92472	0	0.0004324	38.52	0.0767702	2	2467.05	-0.62747	54.0683	0
	High	QEsDPEDDDVkkPALQSSVVATSk	4	1	1	Q9H307	S3(Phospho); K11(Lys8); K12(Lys8); K24(Lys8)	0	7.54449e+06	1.15886	4	5.49345	0	6.281e-05	25.34	2.4829	3	2677.27	1.69019	29.515	1
	High	QQDsQPEEVmDVLEmVENVK	2	1	1	Q9H307	S4(Phospho); M10(Oxidation); M15(Oxidation)	0	463760	1.19688	2	11.3955	0.001	0.01404	20.92	4.17413	3	2459.03	-0.644007	54.0658	0
	High	QEsDPEDDDVKKPALQSSVVATSK	1	1	1	Q9H307	S3(Phospho)	0	7.70696e+06				0.001	0.01015	12.31	47.005	3	2653.23	1.74942	29.8129	1
P52948-4	Isoform 4 of Nuclear pore complex protein Nup98-Nup96 OS=Homo sapiens GN=NUP98 - [NUP98_HUMAN]	37.6	5	6	3	3	9	1.07182e+06	1.03799	7	10.5435	920	96.016	7.63525
	A2	Sequence	# PSMs	# Proteins	# Protein Groups	Protein Group Accessions	Modifications	ΔCn	Area	Light/Heavy	Light/Heavy Count	Light/Heavy Variability [%]	q-Value	PEP	IonScore	Exp Value	Charge	MH+ [Da]	ΔM [ppm]	RT [min]	# Missed Cleavages
	High	NLNNSNLFsPVNr	2	6	1	P52948-4	S9(Phospho); R13(Arg10)	0	1.00837e+06	0.863049	2	16.9704	0	0.0009421	26.87	0.615328	2	1578.73	1.08679	40.262	0
	High	YGLQDsDEEEEEHPSk	2	6	1	P52948-4	S6(Phospho); K16(Lys8)	0	1.82048e+06	1.06004	2	3.11707	0	0.001122	20.47	1.66608	2	1979.77	0.890518	24.8802	0
	High	YGLQDsDEEEEEHPSK	3	6	1	P52948-4	S6(Phospho)	0	1.88964e+06	1.0404	1		0.001	0.01294	19.53	1.84193	2	1971.75	2.33776	25.094	0
	High	DSENLASPsEYPENGER	1	6	1	P52948-4	S9(Phospho)	0	305193	1.23462	1		0.001	0.01507	18.84	2.62148	2	1973.78	0.276945	30.4117	0
	High	DsENLASPSEYPENGEr	1	6	1	P52948-4	S2(Phospho); R17(Arg10)	0	317465	0.894348	1		0.005	0.04055	16.32	5.22928	2	1983.79	2.13759	30.3412	0
C9J5V9	Nuclease-sensitive element-binding protein 1 (Fragment) OS=Homo sapiens GN=YBX1 PE=1 SV=1 - [C9J5V9_HUMAN]	37.06	13.43	3	2	2	7	2.68799e+06	0.948164	5	13.5248	216	23.5836	10.2573
	A2	Sequence	# PSMs	# Proteins	# Protein Groups	Protein Group Accessions	Modifications	ΔCn	Area	Light/Heavy	Light/Heavy Count	Light/Heavy Variability [%]	q-Value	PEP	IonScore	Exp Value	Charge	MH+ [Da]	ΔM [ppm]	RT [min]	# Missed Cleavages
	High	NEGSEsAPEGQAQQR	2	3	1	C9J5V9	S6(Phospho)	0	1.52934e+06	0.833916	2	19.2096	0	8.483e-05	32.38	0.0980162	2	1667.67	0.760036	16.6745	0
	High	NYQQNYQNSEsGEkNEGSESAPEGQAQQr	3	3	1	C9J5V9	S11(Phospho); K14(Lys8); R29(Arg10)	0	2.75231e+06	1.0383	3	4.31945	0	0.000284	25.18	2.34869	3	3355.39	0.835155	22.462	1
	High	NYQQNYQNsESGEKNEGSESAPEGQAQQR	1	3	1	C9J5V9	S9(Phospho)	0	3.76302e+06				0.003	0.02607	11.18	53.5627	3	3337.37	1.64647	22.5271	1
	High	NEGSEsAPEGQAQQr	1	3	1	C9J5V9	S6(Phospho); R15(Arg10)	0	1.61295e+06				0.005	0.03151	10.66	14.5989	2	1677.68	1.50206	16.62	0
Q12873-2	Isoform 2 of Chromodomain-helicase-DNA-binding protein 3 OS=Homo sapiens GN=CHD3 - [CHD3_HUMAN]	36.3679	1.78	3	2	2	9	3.36863e+06	2.00307	6	17.0361	1966	222.721	7.51807
	A2	Sequence	# PSMs	# Proteins	# Protein Groups	Protein Group Accessions	Modifications	ΔCn	Area	Light/Heavy	Light/Heavy Count	Light/Heavy Variability [%]	q-Value	PEP	IonScore	Exp Value	Charge	MH+ [Da]	ΔM [ppm]	RT [min]	# Missed Cleavages
	High	mETEADAPsPAPsLGER	3	3	1	Q12873-2	M1(Oxidation); S9(Phospho); S13(Phospho)	0	3.94243e+06	1.81745	3	2.90659	0	0.0002385	36.27	0.0385112	2	1933.73	1.74014	29.1807	0
	High	ELQGDGPPSsPTNDPTVK	3	3	1	Q12873-2	S10(Phospho)	0	2.79483e+06	2.24387	2	5.32293	0	6.908e-06	31.33	0.279906	2	1918.85	1.26341	26.7953	0
	High	ELQGDGPPsSPTNDPTVk	3	3	1	Q12873-2	S9(Phospho); K18(Lys8)	0	1.22211e+06	2.28327	1		0	0.0007045	20.92	3.31487	2	1926.86	1.80816	26.841	0
Q5T200-2	Isoform 2 of Zinc finger CCCH domain-containing protein 13 OS=Homo sapiens GN=ZC3H13 - [ZC3HD_HUMAN]	36.01	2.88	2	4	4	7	4.91352e+06	1.87173	5	2.54117	1564	184.76	9.46631
	A2	Sequence	# PSMs	# Proteins	# Protein Groups	Protein Group Accessions	Modifications	ΔCn	Area	Light/Heavy	Light/Heavy Count	Light/Heavy Variability [%]	q-Value	PEP	IonScore	Exp Value	Charge	MH+ [Da]	ΔM [ppm]	RT [min]	# Missed Cleavages
	High	tPsPPPPIPEDIALGk	2	2	1	Q5T200-2	T1(Phospho); S3(Phospho); K16(Lys8)	0	5.56292e+06	1.87703	2	0.41873	0	0.001795	25.22	1.27608	2	1796.84	1.2223	46.2258	0
	High	sAsPYPSHSLSsPQr	1	2	1	Q5T200-2	S1(Phospho); S3(Phospho); S12(Phospho); R15(Arg10)	0	1.2868e+06	1.30295	1		0	0.0009115	13.13	5.13403	2	1850.68	0.881919	27.773	0
	High	tPsPPPPIPEDIALGK	2	2	1	Q5T200-2	T1(Phospho); S3(Phospho)	0	1.04123e+07				0.001	0.01354	21.27	2.92384	2	1788.83	1.65893	46.0206	0
	High	GPRtPsPPPPIPEDIALGK	1	2	1	Q5T200-2	T4(Phospho); S6(Phospho)	0	2.99336e+06	1.90409	1		0.005	0.03824	12.64	29.0846	3	2099	0.328632	43.4011	1
	High	sLsPSHLTEDR	1	2	1	Q5T200-2	S1(Phospho); S3(Phospho)	0	1.33489e+06	1.03521	1		0.007	0.06574	18.92	1.45801	2	1401.55	0.930977	30.8761	0
Q9P1Y6-2	Isoform 2 of PHD and RING finger domain-containing protein 1 OS=Homo sapiens GN=PHRF1 - [PHRF1_HUMAN]	35.39	3.21	5	2	2	7	2.43159e+06	1.30126	5	26.8199	1494	161.842	9.0708
	A2	Sequence	# PSMs	# Proteins	# Protein Groups	Protein Group Accessions	Modifications	ΔCn	Area	Light/Heavy	Light/Heavy Count	Light/Heavy Variability [%]	q-Value	PEP	IonScore	Exp Value	Charge	MH+ [Da]	ΔM [ppm]	RT [min]	# Missed Cleavages
	High	GAVAAEGAsDTErEEPTESQGLAAr	1	5	1	Q9P1Y6-2	S9(Phospho); R13(Arg10); R25(Arg10)	0	1.6936e+06	1.03753	1		0	0.001744	32.47	0.393055	3	2602.16	0.86906	28.6862	1
	High	GAVAAEGASDtEREEPTESQGLAAR	2	5	1	Q9P1Y6-2	T11(Phospho)	0	1.84726e+06	1.12058	1		0	0.0003625	23.89	2.80148	3	2582.14	2.08033	28.6987	1
	High	AEAPSsPDVAPAGkEDsPSASGr	2	5	1	Q9P1Y6-2	S6(Phospho); K14(Lys8); S17(Phospho); R23(Arg10)	0	2.03849e+06	1.56328	2	27.71	0	0.001435	23.14	2.12702	3	2360.98	0.931172	24.5999	1
	High	AEAPsSPDVAPAGKEDsPSASGR	2	5	1	Q9P1Y6-2	S5(Phospho); S17(Phospho)	0	3.01593e+06	1.55441	1		0	0.001699	21.11	2.96541	3	2342.96	0.99345	24.3275	1
Q92804-2	Isoform Short of TATA-binding protein-associated factor 2N OS=Homo sapiens GN=TAF15 - [RBP56_HUMAN]	34.62	6.96	2	2	2	3	724152	1.31279	3	8.41351	589	61.521	8.01611
	A2	Sequence	# PSMs	# Proteins	# Protein Groups	Protein Group Accessions	Modifications	ΔCn	Area	Light/Heavy	Light/Heavy Count	Light/Heavy Variability [%]	q-Value	PEP	IonScore	Exp Value	Charge	MH+ [Da]	ΔM [ppm]	RT [min]	# Missed Cleavages
	High	QSSYSQQPYNNQGQQQNmESSGSQGGr	1	2	1	Q92804-2	M18(Oxidation); R27(Arg10)	0	764141	1.2053	1		0	8.109e-07	34.62	0.245138	3	3001.26	1.32876	21.6368	0
	High	GEATVSFDDPPSAK	1	2	1	Q92804-2		0	404070	1.38931	1		0.001	0.0125	14.28	9.37045	2	1420.66	2.0368	29.8283	0
	High	QSSYSQQPYNNQGQQQNmESSGSQGGR	1	2	1	Q92804-2	M18(Oxidation)	0	1.04423e+06	1.31279	1		0.007	0.06191	16.64	14.7556	3	2991.26	1.54704	20.9897	0
P06748-3	Isoform 3 of Nucleophosmin OS=Homo sapiens GN=NPM1 - [NPM_HUMAN]	32.7167	24.32	3	3	3	7	2.26164e+06	1.02892	6	6.80622	259	28.3827	4.71631
	A2	Sequence	# PSMs	# Proteins	# Protein Groups	Protein Group Accessions	Modifications	ΔCn	Area	Light/Heavy	Light/Heavy Count	Light/Heavy Variability [%]	q-Value	PEP	IonScore	Exp Value	Charge	MH+ [Da]	ΔM [ppm]	RT [min]	# Missed Cleavages
	High	VDNDENEHQLSLr	2	3	1	P06748-3	R13(Arg10)	0	1.10053e+06	0.942938	2	9.76868	0	0.0002197	27.21	0.589334	2	1578.74	0.887621	25.082	0
	High	cGSGPVHISGQHLVAVEEDAEsEDEEEEDVk	3	3	1	P06748-3	C1(Carbamidomethyl); S22(Phospho); K31(Lys8)	0	4.69541e+06	1.05131	3	2.34105	0	0.001697	23.48	3.9153	3	3468.45	0.672683	38.5374	0
	High	DELHIVEAEAmNYEGsPIk	1	3	1	P06748-3	M11(Oxidation); S16(Phospho); K19(Lys8)	0	708633	1.30416	1		0.001	0.002658	19.77	6.14866	3	2249	1.43767	45.6225	0
	High	DELHIVEAEAmNYEGsPIK	1	3	1	P06748-3	M11(Oxidation); S16(Phospho)	0	988979				0.009	0.07903	10.41	47.2199	3	2240.98	0.0711171	45.5784	0
O60506-2	Isoform 2 of Heterogeneous nuclear ribonucleoprotein Q OS=Homo sapiens GN=SYNCRIP - [HNRPQ_HUMAN]	32.1367	6.97	2	2	2	7	644774	1.09272	4	7.12775	588	65.6416	8.60205
	A2	Sequence	# PSMs	# Proteins	# Protein Groups	Protein Group Accessions	Modifications	ΔCn	Area	Light/Heavy	Light/Heavy Count	Light/Heavy Variability [%]	q-Value	PEP	IonScore	Exp Value	Charge	MH+ [Da]	ΔM [ppm]	RT [min]	# Missed Cleavages
	High	TGYTLDVTTGQr	3	2	1	O60506-2	R12(Arg10)	0	903344	1.11346	3	8.67858	0	4.346e-05	24.11	0.910989	2	1321.66	-1.25618	31.6219	0
	High	TGYTLDVTTGQR	3	2	1	O60506-2		0	934773				0	0.001718	16.82	4.73963	2	1311.65	0.29213	31.2556	0
	High	QTNNQNWGSQPIAQQPLQGGDHSGNYGYk	1	2	1	O60506-2	K29(Lys8)	0	354776	1.07236	1		0.001	0.005614	13.7	45.3198	3	3195.47	-0.312917	35.5869	0
Q96T37-4	Isoform 4 of Putative RNA-binding protein 15 OS=Homo sapiens GN=RBM15 - [RBM15_HUMAN]	30.8	4.05	5	2	2	5	2.98487e+06	1.35619	5	11.3074	913	99.6409	9.92041
	A2	Sequence	# PSMs	# Proteins	# Protein Groups	Protein Group Accessions	Modifications	ΔCn	Area	Light/Heavy	Light/Heavy Count	Light/Heavy Variability [%]	q-Value	PEP	IonScore	Exp Value	Charge	MH+ [Da]	ΔM [ppm]	RT [min]	# Missed Cleavages
	High	sLsPGGAALGYR	1	5	1	Q96T37-4	S1(Phospho); S3(Phospho)	0	633642	1.16309	1		0	0.001467	30.8	0.0989383	2	1308.54	0.791019	36.8898	0
	High	sRsPLDKDTYPPSASVVGASVGGHR	4	5	1	Q96T37-4	S1(Phospho); S3(Phospho)	0	5.3361e+06	1.36997	4	5.64024	0.001	0.005395	27.1	1.56972	4	2700.22	0.163392	34.5811	2
Q13112	Chromatin assembly factor 1 subunit B OS=Homo sapiens GN=CHAF1B PE=1 SV=1 - [CAF1B_HUMAN]	30.27	5.55	1	2	2	4	1.43691e+06	1.45014	4	10.847	559	61.4542	7.50342
	A2	Sequence	# PSMs	# Proteins	# Protein Groups	Protein Group Accessions	Modifications	ΔCn	Area	Light/Heavy	Light/Heavy Count	Light/Heavy Variability [%]	q-Value	PEP	IonScore	Exp Value	Charge	MH+ [Da]	ΔM [ppm]	RT [min]	# Missed Cleavages
	High	GSsPGPRPVEGTPASR	1	1	1	Q13112	S3(Phospho)	0	755786	1.5644	1		0	0.0004024	26.91	0.623131	3	1631.76	0.826598	21.369	0
	High	TQDPSsPGTTPPQAr	2	1	1	Q13112	S6(Phospho); R15(Arg10)	0	1.67557e+06	1.45014	2	10.4146	0.001	0.009582	17.76	4.40007	2	1629.72	1.10008	19.4745	0
	High	TQDPSsPGTTPPQAR	1	1	1	Q13112	S6(Phospho)	0	2.11804e+06	1.29992	1		0.005	0.04333	14.61	8.91832	2	1619.71	0.936527	19.8113	0
J3QLL0	Importin subunit alpha-1 (Fragment) OS=Homo sapiens GN=KPNA2 PE=1 SV=1 - [J3QLL0_HUMAN]	28.45	23.88	3	2	2	3	1.05162e+06	0.517336	3	36.5147	134	15.2249	10.2134
	A2	Sequence	# PSMs	# Proteins	# Protein Groups	Protein Group Accessions	Modifications	ΔCn	Area	Light/Heavy	Light/Heavy Count	Light/Heavy Variability [%]	q-Value	PEP	IonScore	Exp Value	Charge	MH+ [Da]	ΔM [ppm]	RT [min]	# Missed Cleavages
	High	NVSSFPDDATsPLQENr	2	3	1	J3QLL0	S11(Phospho); R17(Arg10)	0	1.83692e+06	0.476704	2	50.3164	0	0.001843	30.41	0.322519	2	1966.85	3.9737	36.7516	0
	High	NNQGTVNWSVDDIVk	1	3	1	J3QLL0	K15(Lys8)	0	266321	0.517336	1		0.007	0.05831	13.02	19.0499	2	1696.84	0.402169	43.0396	0
K7EMV3	Histone H3 OS=Homo sapiens GN=H3F3B PE=1 SV=1 - [K7EMV3_HUMAN]	28.4	25	8	3	3	5	3.10397e+06	0.972966	5	18.6343	92	10.3278	11.8247
	A2	Sequence	# PSMs	# Proteins	# Protein Groups	Protein Group Accessions	Modifications	ΔCn	Area	Light/Heavy	Light/Heavy Count	Light/Heavy Variability [%]	q-Value	PEP	IonScore	Exp Value	Charge	MH+ [Da]	ΔM [ppm]	RT [min]	# Missed Cleavages
	High	STELLIr	2	8	1	K7EMV3	R7(Arg10)	0	3.31277e+06	0.919718	2	8.35893	0.001	0.01108	26.34	0.1864	2	841.502	-0.0650647	30.5994	0
	High	STELLIR	1	8	1	K7EMV3		0	4.3253e+06	0.85897	1		0.005	0.04112	32.27	0.060004	2	831.494	0.336356	30.5073	0
	High	EIAQDFK	1	8	1	K7EMV3		0	2.61644e+06	1.13367	1		0.005	0.04015	26.79	0.152661	2	850.43	-0.0985141	24.0235	0
	High	YrPGTVALr	1	8	1	K7EMV3	R2(Arg10); R9(Arg10)	0	2.37018e+06	1.20049	1		0.005	0.04395	23.79	0.571592	3	1052.61	-0.130666	24.5059	0
Q12906-5	Isoform 5 of Interleukin enhancer-binding factor 3 OS=Homo sapiens GN=ILF3 - [ILF3_HUMAN]	27.71	7.1	4	2	2	5	1.06502e+07	2.0069	4	3.1716	690	74.5603	8.23584
	A2	Sequence	# PSMs	# Proteins	# Protein Groups	Protein Group Accessions	Modifications	ΔCn	Area	Light/Heavy	Light/Heavy Count	Light/Heavy Variability [%]	q-Value	PEP	IonScore	Exp Value	Charge	MH+ [Da]	ΔM [ppm]	RT [min]	# Missed Cleavages
	High	GEDsAEETEAKPAVVAPAPVVEAVSTPSAAFPSDATAEQGPILTK	3	4	1	Q12906-5	S4(Phospho)	0	4.90006e+06	1.94893	2	2.49349	0	0.0001913	27.71	1.89037	3	4515.19	4.74295	51.6563	0
	High	DSSkGEDsAEETEAkPAVVAPAPVVEAVSTPSAAFPSDATAEQGPILTk	1	4	1	Q12906-5	K4(Lys8); S8(Phospho); K15(Lys8); K49(Lys8)	0	1.08828e+07	2.06859	1		0	0.0003226	14.93	37.9196	4	4956.39	-1.07575	50.0641	1
	High	DSSKGEDSAEEtEAKPAVVAPAPVVEAVSTPSAAFPSDATAEQGPILTK	1	4	1	Q12906-5	T12(Phospho)	0	1.64003e+07	2.03214	1		0.001	0.01049	14.02	47.9397	4	4932.37	3.59541	50.3437	1
J3QSD7	Cyclin-dependent kinase 12 (Fragment) OS=Homo sapiens GN=CDK12 PE=1 SV=1 - [J3QSD7_HUMAN]	27.02	2.83	4	2	2	4	1.39613e+06	0.987673	3	23.805	1201	133.577	9.56885
	A2	Sequence	# PSMs	# Proteins	# Protein Groups	Protein Group Accessions	Modifications	ΔCn	Area	Light/Heavy	Light/Heavy Count	Light/Heavy Variability [%]	q-Value	PEP	IonScore	Exp Value	Charge	MH+ [Da]	ΔM [ppm]	RT [min]	# Missed Cleavages
	High	HSsIsPVRLPLNSSLGAELSR	2	4	1	J3QSD7	S3(Phospho); S5(Phospho)	0	1.21005e+06	0.912487	2	11.7794	0	0.0004679	27.02	1.33456	3	2380.15	1.9673	48.2425	1
	High	NSsPAPPQPAPGk	1	4	1	J3QSD7	S3(Phospho); K13(Lys8)	0	1.58221e+06	1.63004	1		0.008	0.06643	26.07	0.539701	2	1335.62	0.902356	19.3188	0
	High	HSsIsPVrLPLNSSLGAELSr	1	4	1	J3QSD7	S3(Phospho); S5(Phospho); R8(Arg10); R21(Arg10)	0	1.16951e+06				0.008	0.07028	13.12	33.7833	3	2400.16	0.578754	47.8149	1
A0A0A0MTP7	Protein SCAF11 OS=Homo sapiens GN=SCAF11 PE=4 SV=1 - [A0A0A0MTP7_HUMAN]	26.59	8.34	4	3	3	3	2.01594e+06	1.17217	3	25.8265	935	105.949	8.26514
	A2	Sequence	# PSMs	# Proteins	# Protein Groups	Protein Group Accessions	Modifications	ΔCn	Area	Light/Heavy	Light/Heavy Count	Light/Heavy Variability [%]	q-Value	PEP	IonScore	Exp Value	Charge	MH+ [Da]	ΔM [ppm]	RT [min]	# Missed Cleavages
	High	SSSNDsVDEETAESDTSPVLEk	1	4	1	A0A0A0MTP7	S6(Phospho); K22(Lys8)	0	784569	0.98754	1		0	2.389e-06	27.58	0.699464	2	2413.99	-0.292578	32.9324	0
	High	AETASQSQRSPIsDNSGcDAPGNSNPSLSVPSSAESEK	1	4	1	A0A0A0MTP7	S13(Phospho); C18(Carbamidomethyl)	0	1.69121e+06	1.45604	1		0.001	0.004252	18.46	16.6525	3	3928.68	1.38527	32.023	1
	High	FHsPSTTWsPNKDTPQEK	1	4	1	A0A0A0MTP7	S3(Phospho); S9(Phospho)	0	3.57203e+06	1.17217	1		0.005	0.03251	16.01	8.42679	3	2246.92	0.556289	28.9887	1
Q9UQ35	Serine/arginine repetitive matrix protein 2 OS=Homo sapiens GN=SRRM2 PE=1 SV=2 - [SRRM2_HUMAN]	26.36	6.36	4	9	9	19	9.32509e+06	1.20991	15	34.5721	2752	299.438	12.0591
	A2	Sequence	# PSMs	# Proteins	# Protein Groups	Protein Group Accessions	Modifications	ΔCn	Area	Light/Heavy	Light/Heavy Count	Light/Heavy Variability [%]	q-Value	PEP	IonScore	Exp Value	Charge	MH+ [Da]	ΔM [ppm]	RT [min]	# Missed Cleavages
	High	HGGsPQPLATTPLSQEPVNPPSEASPtr	4	4	1	Q9UQ35	S4(Phospho); T27(Phospho); R28(Arg10)	0	4.51686e+06	1.66342	2	12.7923	0	0.0001298	27.76	1.63826	3	3022.36	-0.710365	38.9261	0
	High	HGGsPQPLATTPLSQEPVNPPSEASPtR	3	4	1	Q9UQ35	S4(Phospho); T27(Phospho)	0	7.16771e+06	1.66951	1		0	0.0001761	22.07	5.83865	3	3012.35	0.229022	38.3858	0
	High	QGSITsPQANEQSVtPQR	1	4	1	Q9UQ35	S6(Phospho); T15(Phospho)	0	1.60097e+06	1.19882	1		0	0.001405	16.88	7.29086	2	2087.88	1.2378	27.3989	0
	High	ELSNsPLRENSFGsPLEFR	2	2	1	Q9UQ35	S5(Phospho); S14(Phospho)	0	1.25088e+06	1.19096	2	2.34137	0	0.002022	10.89	43.3097	3	2339.01	1.36116	47.4883	1
	High	sLSYsPVEr	2	2	1	Q9UQ35	S1(Phospho); S5(Phospho); R9(Arg10)	0	2.80745e+06	0.977419	2	1.96398	0.001	0.01721	18.15	1.31138	2	1207.47	0.34336	30.1523	0
	High	QGSITsPQANEQSVtPQr	1	4	1	Q9UQ35	S6(Phospho); T15(Phospho); R18(Arg10)	0	1.54684e+06	1.07341	1		0.001	0.007566	10.59	32.8194	2	2097.89	1.36342	26.8918	0
	High	sRsPLAIR	1	1	1	Q9UQ35	S1(Phospho); S3(Phospho)	0	1.61039e+07	0.966026	1		0.002	0.01904	25.55	0.292682	2	1059.47	-0.0512102	26.4322	1
	High	mGQAPSQSLLPPAQDQPRSPVPsAFSDQSR	2	1	1	Q9UQ35	M1(Oxidation); S23(Phospho)	0	3.44455e+06	1.91894	2	5.17106	0.005	0.03621	13.42	50.9791	3	3275.52	1.86173	40.673	1
	High	GEGDAPFSEPGTtSTQRPSSPETATK	1	4	1	Q9UQ35	T13(Phospho)	0	1.67452e+06	1.52145	1		0.005	0.03308	13.24	31.7813	3	2715.18	-0.046981	30.0244	0
	High	THTTALAGRsPsPASGR	1	4	1	Q9UQ35	S10(Phospho); S12(Phospho)	0	4.18653e+06	1.15515	1		0.006	0.04695	14.1	12.1927	2	1826.8	1.22033	19.8496	1
	High	AQtPPGPSLSGSKsPcPQEK	1	2	1	Q9UQ35	T3(Phospho); S14(Phospho); C16(Carbamidomethyl)	0	4.70365e+06	1.55135	1		0.008	0.07131	19.83	4.20544	3	2212.94	0.840175	26.1201	1
Q9H7N4	Splicing factor, arginine/serine-rich 19 OS=Homo sapiens GN=SCAF1 PE=1 SV=3 - [SFR19_HUMAN]	22.1633	2.67	1	2	2	10	4.2462e+06	2.37734	9	26.3185	1312	139.186	9.24658
	A2	Sequence	# PSMs	# Proteins	# Protein Groups	Protein Group Accessions	Modifications	ΔCn	Area	Light/Heavy	Light/Heavy Count	Light/Heavy Variability [%]	q-Value	PEP	IonScore	Exp Value	Charge	MH+ [Da]	ΔM [ppm]	RT [min]	# Missed Cleavages
	High	QRsPsPAPAPAPAAAAGPPTR	6	1	1	Q9H7N4	S3(Phospho); S5(Phospho)	0	6.86311e+06	2.75045	6	7.40755	0	0.001635	19.04	6.61799	3	2127.98	0.843879	25.934	1
	High	EVLYDsEGLsGEEr	2	1	1	Q9H7N4	S6(Phospho); S10(Phospho); R14(Arg10)	0	1.33735e+06	1.21389	2	5.92258	0.002	0.02022	15	3.93862	2	1752.67	1.17706	35.8224	0
	High	QrsPsPAPAPAPAAAAGPPTr	1	1	1	Q9H7N4	R2(Arg10); S3(Phospho); S5(Phospho); R21(Arg10)	0	2.43226e+06				0.004	0.02696	15.13	16.8535	3	2147.99	1.34866	25.7274	1
	High	EVLYDsEGLsGEER	1	1	1	Q9H7N4	S6(Phospho); S10(Phospho)	0	1.62928e+06	1.02101	1		0.009	0.08143	14.26	4.63279	2	1742.66	0.605197	36.2142	0

## Sheet: Nuclear
Accession	Description	Score	Coverage	# Proteins	# Unique Peptides	# Peptides	# PSMs	Area	Light/Heavy	Light/Heavy Count	Light/Heavy Variability [%]	# AAs	MW [kDa]	calc. pI
P68363	Tubulin alpha-1B chain OS=Homo sapiens GN=TUBA1B PE=1 SV=1 - [TBA1B_HUMAN]	1100.3	40.58	1	12	12	56	8.4749e+06	1.45881	31	23.3248	451	50.1196	5.05908
	A2	Sequence	# PSMs	# Proteins	# Protein Groups	Protein Group Accessions	Modifications	ΔCn	Area	Light/Heavy	Light/Heavy Count	Light/Heavy Variability [%]	q-Value	PEP	IonScore	Exp Value	Charge	MH+ [Da]	ΔM [ppm]	RT [min]	# Missed Cleavages
	High	TIGGGDDSFNTFFSETGAGK	3	1	1	P68363		0	6.23308e+06	1.13999	3	1.57447	0	0.0001502	97.52	7.58934e-08	2	2007.9	1.68867	46.704	0
	High	AVcmLSNTTAIAEAWAR	7	1	1	P68363	C3(Carbamidomethyl); M4(Oxidation)	0	4.37998e+06	1.32304	5	8.3465	0	0.0003568	79.74	4.88964e-06	2	1880.9	2.09347	45.1126	0
	High	TIGGGDDSFNTFFSETGAGk	3	1	1	P68363	K20(Lys8)	0	5.47388e+06				0	0.001531	68.91	5.91168e-05	2	2015.91	-0.517237	46.6951	0
	High	AVcmLSNTTAIAEAWAr	3	1	1	P68363	C3(Carbamidomethyl); M4(Oxidation); R17(Arg10)	0	3.56808e+06				0	0.0001609	67.45	8.17587e-05	2	1890.91	1.06629	45.1066	0
	High	AVFVDLEPTVIDEVr	3	1	1	P68363	R15(Arg10)	0	4.58801e+06	1.49003	3	3.14087	0	0.003641	66.02	7.53854e-05	2	1711.92	1.76501	51.2813	0
	High	DVNAAIATIk	3	1	1	P68363	K10(Lys8)	0	2.71495e+06	1.46661	1		0	0.009818	63.41	5.60469e-05	2	1023.59	-0.273171	33.0037	0
	High	SIQFVDWcPTGFk	3	1	1	P68363	C8(Carbamidomethyl); K13(Lys8)	0	1.7868e+06	1.30785	2	6.82992	0	0.00615	56.37	0.000773914	2	1592.77	2.06952	49.8043	0
	High	AVFVDLEPTVIDEVR	3	1	1	P68363		0	7.14558e+06				0	0.0007481	52.95	0.00163302	2	1701.91	1.25464	51.2444	0
	High	DVNAAIATIK	4	1	1	P68363		0	3.98177e+06	1.40984	2	6.215	0	0.01701	52.76	0.00068406	2	1015.58	-0.357276	32.9983	0
	High	VGINYQPPTVVPGGDLAk	3	1	1	P68363	K18(Lys8)	0	6.17714e+06	1.8852	2	6.34051	0	0.003329	51.7	0.00193258	2	1833	1.84891	41.5958	0
	High	EIIDLVLDR	2	1	1	P68363		0	2.72262e+06	1.01477	2	0.538904	0	0.03792	45.73	0.00405495	2	1085.62	0.452983	47.7352	0
	High	SIQFVDWcPTGFK	4	1	1	P68363	C8(Carbamidomethyl)	0	2.81214e+06	1.57384	1		0	0.02307	42.98	0.0165148	2	1584.75	1.48827	50.0922	0
	High	DYEEVGVDSVEGEGEEEGEEY	1	1	1	P68363		0	5.23318e+06				0	0.004995	39.96	0.0269925	2	2348.91	0.781036	40.8736	0
	High	VGINYQPPTVVPGGDLAK	4	1	1	P68363		0	1.2046e+07	1.8235	1		0	0.03309	27.8	0.537125	2	1824.99	0.206107	41.3431	0
	High	QLFHPEQLITGKEDAANNYAR	2	1	1	P68363		0	2.55737e+06	1.84671	2	20.0413	0	0.005085	19.91	6.72136	4	2415.21	0.294808	39.4737	1
	High	NLDIErPTYTNLNr	2	1	1	P68363	R6(Arg10); R14(Arg10)	0	6.1378e+06	1.64362	2	7.52723	0	0.04108	19.14	4.6218	3	1738.9	0.511789	33.8243	0
	High	IHFPLATYAPVISAEK	1	1	1	P68363		0	2.49049e+06	1.72477	1		0	0.05026	11.46	18.4662	2	1756.97	1.5303	47.9335	0
	High	NLDIERPTYTNLNR	1	1	1	P68363		0	5.32848e+06	1.39577	1		0.001	0.08587	14.9	12.4211	2	1718.88	1.30529	34.1614	0
	High	QLFHPEQLITGkEDAANNYAr	1	1	1	P68363	K12(Lys8); R21(Arg10)	0	1.42137e+06	1.09445	1		0.002	0.1016	10.62	55.5419	3	2433.23	0.470837	39.4732	1
	High	YmAccLLYR	3	1	1	P68363	M2(Oxidation); C4(Carbamidomethyl); C5(Carbamidomethyl)	0	1.12327e+06	1.63722	2	16.8641	0.004	0.1511	28.51	0.204488	2	1265.55	0.63462	34.794	0
E9PKE3	Heat shock cognate 71 kDa protein OS=Homo sapiens GN=HSPA8 PE=1 SV=1 - [E9PKE3_HUMAN]	1043.88	18.98	2	8	10	57	6.19833e+06	1.03909	29	13.1139	627	68.7632	5.51611
	A2	Sequence	# PSMs	# Proteins	# Protein Groups	Protein Group Accessions	Modifications	ΔCn	Area	Light/Heavy	Light/Heavy Count	Light/Heavy Variability [%]	q-Value	PEP	IonScore	Exp Value	Charge	MH+ [Da]	ΔM [ppm]	RT [min]	# Missed Cleavages
	High	DAGTIAGLNVLr	3	2	1	E9PKE3	R12(Arg10)	0	4.27527e+06	1.0245	2	5.56593	0	0.002559	88.56	2.30776e-07	2	1209.68	0.0533084	42.2621	0
	High	IINEPTAAAIAYGLDk	3	3	2	P11021;E9PKE3	K16(Lys8)	0	3.27537e+06	1.23561	2	15.236	0	0.0004488	74.69	9.52819e-06	2	1667.91	0.940123	44.1992	0
	High	TTPSYVAFTDTER	4	2	1	E9PKE3		0	5.29973e+06	1.36985	3	14.4102	0	0.003323	71.49	2.03507e-05	2	1487.7	0.512647	34.6505	0
	High	DAGTIAGLNVLR	3	2	1	E9PKE3		0	4.4237e+06	1.03909	1		0	0.007867	70.86	1.34948e-05	2	1199.67	0.536026	42.1768	0
	High	SQIHDIVLVGGSTr	2	2	1	E9PKE3	R14(Arg10)	0	1.85582e+06	0.942385	2	8.00298	0	0.0008862	62.18	0.000144979	2	1491.82	0.460739	32.6532	0
	High	IINEPTAAAIAYGLDK	3	3	2	P11021;E9PKE3		0	4.21829e+06	1.18297	1		0	0.0002134	57.5	0.000526282	2	1659.9	1.33577	44.1537	0
	High	NQVAmNPTNTVFDAk	4	2	1	E9PKE3	M5(Oxidation); K15(Lys8)	0	2.97258e+06	1.12928	2	4.71728	0	0.0005841	53.94	0.00149712	2	1673.81	0.652537	31.3008	0
	High	STAGDTHLGGEDFDNr	6	2	1	E9PKE3	R16(Arg10)	0	3.84549e+06	0.806655	4	6.40495	0	0.005552	49.16	0.00315906	2	1701.74	1.43702	25.2548	0
	High	TTPSYVAFTDTEr	2	2	1	E9PKE3	R13(Arg10)	0	3.79754e+06				0	0.03939	48.28	0.00429955	2	1497.71	0.0414134	34.7109	0
	High	SQIHDIVLVGGSTR	2	2	1	E9PKE3		0	1.84574e+06				0	0.003854	46.42	0.00540669	2	1481.81	1.18382	32.9723	0
	High	VEIIANDQGNr	3	3	2	P11021;E9PKE3	R11(Arg10)	0	8.87158e+06	1.02211	2	4.4194	0	0.0462	45.08	0.00770552	2	1238.64	0.221194	23.2577	0
	High	NQVAmNPTNTVFDAK	4	2	1	E9PKE3	M5(Oxidation)	0	3.32107e+06	1.07681	1		0	0.003488	43.92	0.0144057	2	1665.79	1.70492	31.3069	0
	High	NSLESYAFNmk	4	2	1	E9PKE3	M10(Oxidation); K11(Lys8)	0	1.21749e+06	0.963621	2	4.45028	0	0.03393	40.83	0.0175781	2	1327.61	0.797688	34.0285	0
	High	NSLESYAFNmK	2	2	1	E9PKE3	M10(Oxidation)	0	1.37326e+06	0.932229	1		0	0.03419	39.88	0.0214804	2	1319.6	1.01698	34.0634	0
	High	STAGDTHLGGEDFDNR	5	2	1	E9PKE3		0	3.65095e+06	0.978808	2	10.2027	0	0.04921	27.52	0.455095	3	1691.73	0.76937	25.2277	0
	High	VEIIANDQGNR	3	3	2	P11021;E9PKE3		0	8.68071e+06	1.03712	1		0	0.04197	22.89	1.16251	2	1228.63	0.0977732	22.7905	0
	High	IINEPTAAAIAYGLDkk	1	2	1	E9PKE3	K16(Lys8); K17(Lys8)	0	2.93248e+06	1.16344	1		0	0.006567	22.43	1.09038	3	1804.02	0.265439	41.2715	1
	High	FEELNADLFR	2	2	1	E9PKE3		0	1.30102e+06	1.02595	2	5.10496	0.001	0.06593	37.2	0.0435493	2	1253.62	1.16464	44.7152	0
	High	IINEPTAAAIAYGLDKK	1	2	1	E9PKE3		0	3.41176e+06				0.002	0.09999	22.08	1.43524	3	1787.99	0.106451	41.2776	1
P61978-3	Isoform 3 of Heterogeneous nuclear ribonucleoprotein K OS=Homo sapiens GN=HNRNPK - [HNRPK_HUMAN]	990.978	33.64	3	11	11	55	1.16158e+07	1.07995	27	13.4777	440	48.5322	5.5415
	A2	Sequence	# PSMs	# Proteins	# Protein Groups	Protein Group Accessions	Modifications	ΔCn	Area	Light/Heavy	Light/Heavy Count	Light/Heavy Variability [%]	q-Value	PEP	IonScore	Exp Value	Charge	MH+ [Da]	ΔM [ppm]	RT [min]	# Missed Cleavages
	High	GSYGDLGGPIITTQVTIPk	4	3	1	P61978-3	K19(Lys8)	0	8.39166e+06	1.17408	3	1.02678	0	0.0004381	73.42	1.30832e-05	2	1925.05	1.70919	46.2433	0
	High	IITITGTQDQIQNAQYLLQNSVK	9	3	1	P61978-3		0	1.41434e+07	0.919747	6	2.44836	0	0.0008474	71.61	2.33439e-05	2	2589.39	0.994612	53.5128	0
	High	IILDLISESPIk	3	3	1	P61978-3	K12(Lys8)	0	9.02768e+06	1.15083	2	2.74501	0	0.001568	67.87	1.22479e-05	2	1348.82	1.07588	52.1149	0
	High	IILDLISESPIK	3	3	1	P61978-3		0	1.02213e+07	1.13221	1		0	0.009477	57.51	0.000152758	2	1340.81	1.11128	52.1592	0
	High	IDEPLEGSEDR	4	3	1	P61978-3		0	7.55654e+06	1.15414	2	4.80542	0	0.00748	49.95	0.00192605	2	1259.58	0.0393315	25.5743	0
	High	IITITGTQDQIQNAQYLLQNSVk	8	3	1	P61978-3	K23(Lys8)	0	1.54002e+07				0	5.89e-05	49.87	0.00303397	3	2597.41	1.81736	53.4591	0
	High	TDYNASVSVPDSSGPEr	3	3	1	P61978-3	R17(Arg10)	0	6.66836e+06	1.20204	2	3.68767	0	0.001598	49.55	0.00407455	2	1790.81	1.66946	29.6045	0
	High	GSYGDLGGPIITTQVTIPK	3	3	1	P61978-3		0	9.22579e+06				0	0.001122	48.12	0.0049134	2	1917.03	0.717768	46.237	0
	High	TDYNASVSVPDSSGPER	3	3	1	P61978-3		0	8.21741e+06	1.22427	1		0	0.01044	45.16	0.0107271	2	1780.8	2.20938	29.2479	0
	High	GSDFDcELr	1	3	1	P61978-3	C6(Carbamidomethyl); R9(Arg10)	0	2.58652e+06	0.954221	1		0	0.05787	41.51	0.00594013	2	1108.46	0.220655	28.0806	0
	High	LLIHQSLAGGIIGVK	2	3	1	P61978-3		0	1.25043e+06	1.10152	2	7.12817	0	0.01027	38.94	0.00622264	3	1518.94	-0.576806	42.241	0
	High	IDEPLEGSEDr	3	3	1	P61978-3	R11(Arg10)	0	6.33215e+06	1.25062	1		0	0.02455	38.38	0.027169	2	1269.58	0.352504	25.3947	0
	High	VVLIGGkPDr	1	3	1	P61978-3	K7(Lys8); R10(Arg10)	0	4.82057e+06	1.04695	1		0.002	0.09668	43.5	0.00325409	2	1071.66	0.407786	23.4651	0
	High	VVLIGGKPDR	4	3	1	P61978-3		0	5.04692e+06	1.05257	2	0.594031	0.003	0.1393	36.55	0.0190658	2	1053.64	-0.0419584	23.0681	0
	High	LFQEccPHSTDR	1	3	1	P61978-3	C5(Carbamidomethyl); C6(Carbamidomethyl)	0	1.63511e+06	1.07248	1		0.004	0.1609	16.65	4.34923	2	1549.65	1.56898	22.1931	0
	High	NLPLPPPPPPR	1	3	1	P61978-3		0	3.80436e+06	100	1		0.004	0.1701	16.14	3.15335	2	1194.7	-0.0275224	34.6419	0
	High	DLAGSIIGK	1	3	1	P61978-3		0	3.62409e+06	0.821915	1		0.007	0.1929	31.73	0.0698286	2	873.504	0.156484	34.9113	0
	High	DLAGSIIGk	1	3	1	P61978-3	K9(Lys8)	0	4.40932e+06				0.008	0.2003	28	0.190583	2	881.518	-0.58139	34.9061	0
P68104	Elongation factor 1-alpha 1 OS=Homo sapiens GN=EEF1A1 PE=1 SV=1 - [EF1A1_HUMAN]	929.373	24.68	2	8	8	49	2.92191e+07	1.00879	25	10.2934	462	50.1091	9.01221
	A2	Sequence	# PSMs	# Proteins	# Protein Groups	Protein Group Accessions	Modifications	ΔCn	Area	Light/Heavy	Light/Heavy Count	Light/Heavy Variability [%]	q-Value	PEP	IonScore	Exp Value	Charge	MH+ [Da]	ΔM [ppm]	RT [min]	# Missed Cleavages
	High	IGGIGTVPVGr	3	2	1	P68104	R11(Arg10)	0	3.58556e+07	0.990096	2	0.944813	0	0.001212	101.36	7.21634e-09	2	1035.62	0.0362799	31.2595	0
	High	IGGIGTVPVGR	3	2	1	P68104		0	3.58596e+07	1.00243	1		0	0.004659	80.77	9.05788e-07	2	1025.61	0.243691	31.5809	0
	High	YYVTIIDAPGHR	7	2	1	P68104		0	7.79937e+06	1.0317	5	10.2977	0	0.004839	67.16	5.4385e-05	3	1404.73	0.473047	35.3424	0
	High	YYVTIIDAPGHr	7	2	1	P68104	R12(Arg10)	0	7.27875e+06	0.912987	1		0	0.006049	61.22	0.000204743	2	1414.74	0.738953	35.3365	0
	High	EHALLAYTLGVK	3	2	1	P68104		0	4.27852e+06	1.00056	2	9.07152	0	0.006517	57.5	0.000345253	2	1314.74	-0.0278023	39.2555	0
	High	EHALLAYTLGVk	3	2	1	P68104	K12(Lys8)	0	4.36032e+06	0.88017	1		0	0.008377	51.48	0.00115074	2	1322.76	0.404424	39.1993	0
	High	VETGVLKPGmVVTFAPVNVTTEVK	6	2	1	P68104	M10(Oxidation)	0	2.20586e+07	1.09574	3	0.996758	0	0.0003893	45.33	0.00768773	3	2531.38	1.65822	46.1292	0
	High	SGDAAIVDmVPGKPmcVESFSDYPPLGR	3	2	1	P68104	M9(Oxidation); M15(Oxidation); C16(Carbamidomethyl)	0	7.17949e+06	1.33594	2	4.36737	0	0.001517	34	0.400277	3	3027.4	3.19877	44.7208	0
	High	VETGVLkPGmVVTFAPVNVTTEVk	3	2	1	P68104	K7(Lys8); M10(Oxidation); K24(Lys8)	0	2.01313e+07	0.923246	2	28.6724	0	0.002323	27	0.386682	3	2547.41	1.76105	46.1658	0
	High	LPLQDVYk	4	2	1	P68104	K8(Lys8)	0	2.92322e+07	1.01897	3	1.1986	0.001	0.06871	47.83	0.00223656	2	983.565	0.167672	33.2455	0
	High	LPLQDVYK	3	2	1	P68104		0	2.97391e+07				0.001	0.06877	43.94	0.005536	2	975.551	-0.166523	33.2509	0
	High	QTVAVGVIk	2	2	1	P68104	K9(Lys8)	0	1.38558e+07	0.937545	1		0.002	0.09741	35.97	0.0143538	2	922.581	0.0369144	27.4106	0
	High	QTVAVGVIK	1	2	1	P68104		0	1.31138e+07	0.965525	1		0.004	0.1555	39.97	0.00840788	2	914.567	-0.187237	27.4158	0
	High	STTTGHLIYk	1	2	1	P68104	K10(Lys8)	0	9.29934e+06	0.01	1		0.006	0.1802	14.11	6.70724	2	1128.61	-0.091413	19.9629	0
P10809	60 kDa heat shock protein, mitochondrial OS=Homo sapiens GN=HSPD1 PE=1 SV=2 - [CH60_HUMAN]	876.14	27.75	1	13	13	48	6.2392e+06	1.13149	30	10.9158	573	61.0164	5.87158
	A2	Sequence	# PSMs	# Proteins	# Protein Groups	Protein Group Accessions	Modifications	ΔCn	Area	Light/Heavy	Light/Heavy Count	Light/Heavy Variability [%]	q-Value	PEP	IonScore	Exp Value	Charge	MH+ [Da]	ΔM [ppm]	RT [min]	# Missed Cleavages
	High	LVQDVANNTNEEAGDGTTTATVLAR	5	1	1	P10809		0	1.03555e+07	1.07608	5	3.85174	0	1.04e-05	108.33	1.07393e-08	2	2560.25	1.49896	34.7282	0
	High	LVQDVANNTNEEAGDGTTTATVLAr	6	1	1	P10809	R25(Arg10)	0	9.24919e+06	1.12102	1		0	1.468e-05	83.3	3.43598e-06	2	2570.26	2.55034	34.8427	0
	High	VGLQVVAVk	3	1	1	P10809	K9(Lys8)	0	3.70066e+06	1.07544	3	1.412	0	0.007761	80.82	2.40517e-07	2	920.602	0.182576	32.5945	0
	High	TVIIEQSWGSPK	3	1	1	P10809		0	4.3823e+06	1.33009	1		0	0.02036	55.92	0.00060485	2	1344.72	0.647797	35.6447	0
	High	VGLQVVAVK	3	1	1	P10809		0	3.97982e+06				0	0.0117	55.25	0.000138372	2	912.588	0.0260997	32.5997	0
	High	TVIIEQSWGSPk	3	1	1	P10809	K12(Lys8)	0	3.21917e+06	1.44196	2	9.15077	0	0.02928	52.33	0.00141695	2	1352.73	0.976203	35.761	0
	High	GYISPYFINTSk	4	1	1	P10809	K12(Lys8)	0	2.95692e+06	1.2333	3	1.84808	0	0.01628	39.25	0.0322322	2	1397.72	0.293135	40.6579	0
	High	VTDALNATr	3	1	1	P10809	R9(Arg10)	0	3.76107e+06	1.14706	1		0	0.04797	34.34	0.0501208	2	970.52	0.327158	20.0436	0
	High	cEFQDAYVLLSEK	2	1	1	P10809	C1(Carbamidomethyl)	0	830800	1.02468	2	67.1435	0	0.03176	28.27	0.472723	2	1601.75	1.51747	46.9396	0
	High	TLNDELEIIEGmK	1	1	1	P10809	M12(Oxidation)	0	1.2328e+06	1.02693	1		0	0.03399	26.45	0.744955	2	1520.75	0.356635	44.9193	0
	High	cEFQDAYVLLSEk	2	1	1	P10809	C1(Carbamidomethyl); K13(Lys8)	0	774982	1.13073	1		0	0.04069	23.98	1.37501	2	1609.77	2.69908	47.0902	0
	High	NAGVEGSLIVEk	1	1	1	P10809	K12(Lys8)	0	1.72557e+06	0.777075	1		0	0.04223	22.71	1.03677	2	1223.67	0.961974	30.6851	0
	High	TLNDELEIIEGmk	1	1	1	P10809	M12(Oxidation); K13(Lys8)	0	1.26745e+06				0	0.04436	18.47	4.7968	2	1528.77	1.52709	44.9074	0
	High	NAGVEGSLIVEK	2	1	1	P10809		0	1.3299e+06	0.851631	1		0.001	0.07893	19.59	2.15515	2	1215.66	2.90815	31.1206	0
	High	LSDGVAVLK	2	1	1	P10809		0	3.18471e+06	1.10343	1		0.002	0.1004	25.35	0.290138	2	901.535	0.0961575	29.4326	0
	High	VGEVIVTkDDAmLLk	1	1	1	P10809	K8(Lys8); M12(Oxidation); K15(Lys8)	0	453225	1.09461	1		0.002	0.1021	22.97	1.05626	3	1662.93	-0.352852	35.8792	1
	High	VGEVIVTk	1	1	1	P10809	K8(Lys8)	0	928755	1.1073	1		0.002	0.09537	22.28	0.43746	2	852.528	0.110854	22.6102	0
	High	VGGTSDVEVNEk	1	1	1	P10809	K12(Lys8)	0	1.40705e+06	1.14362	1		0.002	0.09216	21.9	1.37718	2	1241.61	1.10777	18.9638	0
	High	ISSIQSIVPALEIANAHR	1	1	1	P10809		0	655854	1.74198	1		0.002	0.09369	13.64	9.88943	2	1919.07	-1.97233	50.0217	0
	High	VTDALNATR	1	1	1	P10809		0	1.92503e+06	3.57667	1		0.004	0.1691	17.82	2.12938	2	960.511	0.170391	19.5862	0
	High	LSDGVAVLk	2	1	1	P10809	K9(Lys8)	0	2.94251e+06	1.12687	2	11.4841	0.005	0.171	28.4	0.108697	2	909.55	0.0526036	29.4274	0
P04406-2	Isoform 2 of Glyceraldehyde-3-phosphate dehydrogenase OS=Homo sapiens GN=GAPDH - [G3P_HUMAN]	762.832	32.42	2	6	6	39	9.81693e+06	1.20264	20	15.8556	293	31.528	7.60596
	A2	Sequence	# PSMs	# Proteins	# Protein Groups	Protein Group Accessions	Modifications	ΔCn	Area	Light/Heavy	Light/Heavy Count	Light/Heavy Variability [%]	q-Value	PEP	IonScore	Exp Value	Charge	MH+ [Da]	ΔM [ppm]	RT [min]	# Missed Cleavages
	High	IISNAScTTNcLAPLAk	3	2	1	P04406-2	C7(Carbamidomethyl); C11(Carbamidomethyl); K17(Lys8)	0	5.02163e+06	1.14261	2	7.53556	0	0.0005859	73.77	1.78083e-05	2	1841.94	1.19251	34.8581	0
	High	IISNAScTTNcLAPLAK	3	2	1	P04406-2	C7(Carbamidomethyl); C11(Carbamidomethyl)	0	5.62145e+06	1.06766	1		0	0.0004204	71.12	3.41332e-05	2	1833.92	1.01921	35.1672	0
	High	LISWYDNEFGYSNR	4	2	1	P04406-2		0	3.52615e+06	1.04093	2	11.9601	0	0.007193	68.45	5.00613e-05	2	1763.8	0.758155	46.0931	0
	High	LISWYDNEFGYSNr	4	2	1	P04406-2	R14(Arg10)	0	3.12869e+06	1.11135	1		0	0.01591	64.01	0.000150377	2	1773.81	0.978248	46.24	0
	High	VPTANVSVVDLTcr	4	2	1	P04406-2	C13(Carbamidomethyl); R14(Arg10)	0	8.50468e+06	1.05788	2	29.4377	0	0.003275	63.65	0.000136015	2	1540.8	1.2596	38.6785	0
	High	LVINGNPITIFQER	4	2	1	P04406-2		0	1.93814e+06	1.44987	2	7.02928	0	0.007914	58.02	0.000311026	2	1613.9	1.97106	51.0608	0
	High	VPTANVSVVDLTcR	4	2	1	P04406-2	C13(Carbamidomethyl)	0	1.07603e+07	1.14663	3	3.72742	0	0.006433	52.81	0.00170092	2	1530.8	1.40656	38.6662	0
	High	LVINGNPITIFQEr	3	2	1	P04406-2	R14(Arg10)	0	1.34108e+06	1.44521	1		0	0.01263	33.51	0.0841176	2	1623.91	2.88053	50.8877	0
	High	VIISAPSADAPmFVmGVNHEK	3	2	1	P04406-2	M12(Oxidation); M15(Oxidation)	0	5.38907e+06	1.48186	3	2.1767	0	0.02326	31.43	0.434044	3	2245.1	0.922547	38.9078	0
	High	GALQNIIPASTGAAK	3	2	1	P04406-2		0	1.30691e+07	1.21375	3	1.2966	0	0.01131	31.2	0.147316	2	1411.79	1.13932	36.9611	0
	High	GALQNIIPASTGAAk	3	2	1	P04406-2	K15(Lys8)	0	1.07071e+07				0	0.01463	26.18	0.427638	2	1419.81	0.93358	37.1651	0
	High	VIISAPSADAPmFVmGVNHEk	1	2	1	P04406-2	M12(Oxidation); M15(Oxidation); K21(Lys8)	0	3.16302e+06				0.001	0.08106	18.07	9.68014	3	2253.12	0.73949	38.9141	0
P07437	Tubulin beta chain OS=Homo sapiens GN=TUBB PE=1 SV=2 - [TBB5_HUMAN]	700.974	35.36	1	12	12	58	6.94655e+06	1.33672	36	20.6205	444	49.639	4.89404
	A2	Sequence	# PSMs	# Proteins	# Protein Groups	Protein Group Accessions	Modifications	ΔCn	Area	Light/Heavy	Light/Heavy Count	Light/Heavy Variability [%]	q-Value	PEP	IonScore	Exp Value	Charge	MH+ [Da]	ΔM [ppm]	RT [min]	# Missed Cleavages
	High	LAVNmVPFPr	2	1	1	P07437	M5(Oxidation); R10(Arg10)	0	2.61271e+06	0.91268	2	48.2752	0	0.01887	61.84	0.000117998	2	1169.64	0.569315	38.4372	0
	High	ISVYYNEATGGK	3	1	1	P07437		0	5.94208e+06	1.12186	3	1.67335	0	0.02997	58.77	0.000310942	2	1301.64	0.854279	28.7944	0
	High	LAVNmVPFPR	3	1	1	P07437	M5(Oxidation)	0	3.72328e+06	1.3991	2	11.1387	0	0.02911	58.72	0.000263786	2	1159.63	-0.0847776	38.4319	0
	High	mAVTFIGNSTAIQELFK	4	1	1	P07437	M1(Oxidation)	0	1.76781e+06	1.39604	1		0	0.001645	58.57	0.000560081	2	1885.97	0.928259	56.3886	0
	High	ImNTFSVVPSPk	1	1	1	P07437	M2(Oxidation); K12(Lys8)	0	2.13538e+06	1.62874	1		0	0.038	55.19	0.000725551	2	1343.71	0.269829	35.1485	0
	High	AILVDLEPGTmDSVR	2	1	1	P07437	M11(Oxidation)	0	4.71385e+06	1.58701	2	0.704845	0	0.01102	46.84	0.00711715	2	1631.83	1.11223	40.9092	0
	High	ImNTFSVVPSPK	3	1	1	P07437	M2(Oxidation)	0	3.65207e+06	1.65494	2	4.64204	0	0.02703	46.75	0.00492443	2	1335.7	1.30582	35.3157	0
	High	NSSYFVEWIPNNVK	3	1	1	P07437		0	3.08416e+06	1.5629	3	5.85832	0	0.009496	46.45	0.00878569	2	1696.83	0.89517	48.9267	0
	High	EIVHIQAGQcGNQIGAK	7	1	1	P07437	C10(Carbamidomethyl)	0	7.54585e+06	1.1914	3	1.01565	0	0.0008705	45.1	0.0135834	3	1822.92	-1.19359	28.4326	0
	High	NSSYFVEWIPNNVk	2	1	1	P07437	K14(Lys8)	0	1.99226e+06				0	0.01112	44.57	0.0142554	2	1704.85	1.08298	48.9354	0
	High	mAVTFIGNSTAIQELFk	3	1	1	P07437	M1(Oxidation); K17(Lys8)	0	996178	1.37192	2	3.09899	0	0.007682	41.5	0.0280594	2	1893.99	1.74169	56.3342	0
	High	EIVHIQAGQcGNQIGAk	6	1	1	P07437	C10(Carbamidomethyl); K17(Lys8)	0	6.33358e+06	1.20055	3	6.02702	0	0.0003573	39.55	0.047933	2	1830.94	0.964572	28.8597	0
	High	AILVDLEPGTmDSVr	4	1	1	P07437	M11(Oxidation); R15(Arg10)	0	2956177	1.52507	1		0	0.01894	31.82	0.222814	2	1641.84	0.455659	41.0035	0
	High	ALTVPELTQQVFDAK	3	1	1	P07437		0	7.35171e+06	1.41798	1		0	0.03195	23.5	1.32665	2	1659.9	0.820981	50.772	0
	High	LHFFmPGFAPLTSR	2	1	1	P07437	M5(Oxidation)	0	1.06244e+06	1.34781	2	10.3466	0	0.03876	11.45	26.6692	2	1636.83	0.501045	47.5307	0
	High	YLTVAAVFR	3	1	1	P07437		0	1.24535e+06	0.971973	3	0.951136	0.001	0.06777	28.03	0.265452	2	1039.59	1.31295	44.2077	0
	High	ALTVPELTQQVFDAk	2	1	1	P07437	K15(Lys8)	0	5.44641e+06	1.34983	1		0.001	0.06504	22.7	1.52678	2	1667.91	0.281435	51.016	0
	High	EVDEQMLNVQNk	2	1	1	P07437	K12(Lys8)	0	872444	1.59583	2	9.83462	0.002	0.09614	22.04	1.93335	2	1454.7	0.384175	30.187	0
	High	YLTVAAVFr	1	1	1	P07437	R9(Arg10)	0	901436				0.003	0.1352	24.87	0.444604	2	1049.6	-0.646419	44.3354	0
	High	EVDEQmLNVQNK	1	1	1	P07437	M6(Oxidation)	0	2.09998e+06	1.5714	1		0.006	0.1885	20.31	2.53913	2	1462.69	1.54834	23.9735	0
	High	FPGQLNADLr	1	1	1	P07437	R10(Arg10)	0	1.68707e+06	1.08037	1		0.008	0.2043	20.48	1.70388	2	1140.61	1.35002	35.0856	0
P06733	Alpha-enolase OS=Homo sapiens GN=ENO1 PE=1 SV=2 - [ENOA_HUMAN]	697.24	25.35	1	8	8	51	5.99573e+06	1.1189	26	15.0818	434	47.1393	7.38623
	A2	Sequence	# PSMs	# Proteins	# Protein Groups	Protein Group Accessions	Modifications	ΔCn	Area	Light/Heavy	Light/Heavy Count	Light/Heavy Variability [%]	q-Value	PEP	IonScore	Exp Value	Charge	MH+ [Da]	ΔM [ppm]	RT [min]	# Missed Cleavages
	High	GNPTVEVDLFTSK	3	1	1	P06733		0	2.2814e+06	1.11101	2	3.27488	0	0.005773	80.69	2.46375e-06	2	1406.72	0.855556	41.2881	0
	High	DATNVGDEGGFAPNILENK	3	1	1	P06733		0	7.52345e+06	1.13136	3	3.27927	0	8.505e-05	79.6	5.71155e-06	2	1960.93	1.21898	42.099	0
	High	AAVPSGASTGIYEALELR	3	1	1	P06733		0	2.80691e+06	1.24909	2	12.4343	0	0.0002455	67.94	5.76088e-05	2	1804.95	0.86592	48.1715	0
	High	AAVPSGASTGIYEALELr	3	1	1	P06733	R18(Arg10)	0	2.06706e+06	1.57271	1		0	0.00107	67.3	6.66255e-05	2	1814.95	0.273334	48.1838	0
	High	YISPDQLADLYk	3	1	1	P06733	K12(Lys8)	0	5.48228e+06	1.19567	2	2.643	0	0.004849	64.83	9.30979e-05	2	1433.74	1.03681	45.1938	0
	High	LAmQEFmILPVGAANFR	3	1	1	P06733	M3(Oxidation); M7(Oxidation)	0	2.86357e+06	1.08813	2	14.0035	0	0.0004099	53.33	0.00210542	2	1939.97	-1.19297	50.453	0
	High	IGAEVYHNLk	3	1	1	P06733	K10(Lys8)	0	3.64902e+06	1.03727	1		0	0.02351	49.93	0.00183789	2	1151.63	0.432771	25.0906	0
	High	DATNVGDEGGFAPNILENk	4	1	1	P06733	K19(Lys8)	0	6.6499e+06				0	0.0001926	45.11	0.0159123	2	1968.94	1.75227	42.1052	0
	High	LAmQEFmILPVGAANFr	5	1	1	P06733	M3(Oxidation); M7(Oxidation); R17(Arg10)	0	2.84398e+06	1.06847	2	8.8186	0	0.0008897	44.01	0.0182907	2	1949.99	2.89849	50.6622	0
	High	IGAEVYHNLK	4	1	1	P06733		0	3.79086e+06	0.894567	3	7.2774	0	0.03698	43.03	0.00901153	2	1143.62	0.789991	25.4798	0
	High	GNPTVEVDLFTSk	3	1	1	P06733	K13(Lys8)	0	2.30002e+06	0.934254	1		0	0.03119	42.33	0.0160671	2	1414.73	0.736968	41.348	0
	High	VVIGmDVAASEFFR	3	1	1	P06733	M5(Oxidation)	0	1.08256e+06	0.803822	2	14.0483	0	0.01036	41	0.0265981	2	1556.78	1.51766	46.7931	0
	High	DATNVGDEGGFAPNILENkEGLELLk	1	1	1	P06733	K19(Lys8); K26(Lys8)	0	1.04285e+06	1.27452	1		0	0.004997	34.89	0.20928	3	2759.4	-1.30963	52.2198	1
	High	DATNVGDEGGFAPNILENKEGLELLK	4	1	1	P06733		0	1.42857e+06	1.00606	2	8.02075	0	0.003042	34.59	0.23867	3	2743.38	1.64779	52.2522	1
	High	YISPDQLADLYK	4	1	1	P06733		0	6.67289e+06	1.29161	1		0	0.01525	34.57	0.0948265	2	1425.73	1.41236	45.0812	0
	High	VVIGmDVAASEFFr	2	1	1	P06733	M5(Oxidation); R14(Arg10)	0	1.54871e+06	1.65457	1		0	0.02017	18.18	5.19875	2	1566.79	0.749141	46.5096	0
P51991-2	Isoform 2 of Heterogeneous nuclear ribonucleoprotein A3 OS=Homo sapiens GN=HNRNPA3 - [ROA3_HUMAN]	669.496	13.76	2	3	3	19	5.26167e+06	1.1054	12	6.79506	356	37.0062	8.30908
	A2	Sequence	# PSMs	# Proteins	# Protein Groups	Protein Group Accessions	Modifications	ΔCn	Area	Light/Heavy	Light/Heavy Count	Light/Heavy Variability [%]	q-Value	PEP	IonScore	Exp Value	Charge	MH+ [Da]	ΔM [ppm]	RT [min]	# Missed Cleavages
	High	SSGSPYGGGYGSGGGSGGYGSr	2	2	1	P51991-2	R22(Arg10)	0	8.66914e+06	1.15144	1		0	0.0002252	99.59	3.30361e-08	2	1920.8	1.4383	24.2389	0
	High	SSGsPYGGGYGSGGGSGGYGSr	4	2	1	P51991-2	S4(Phospho); R22(Arg10)	0	1.0761e+07	1.14955	2	1.66126	0	0.0003747	93.86	7.33902e-08	2	2000.77	1.18658	24.6626	0
	High	SSGSPYGGGYGSGGGSGGYGSR	3	2	1	P51991-2		0	9.31866e+06	1.07312	2	0.248309	0	0.000167	91.23	2.11994e-07	2	1910.79	0.726471	24.5617	0
	High	SSGsPYGGGYGSGGGSGGYGSR	3	2	1	P51991-2	S4(Phospho)	0	1.26746e+07	1.17783	1		0	0.0005118	85.34	5.13335e-07	2	1990.76	1.97372	24.6938	0
	High	WGTLTDcVVmr	3	2	1	P51991-2	C7(Carbamidomethyl); M10(Oxidation); R11(Arg10)	0	1.02941e+06	1.28467	3	35.7131	0	0.04061	29.01	0.29523	2	1363.64	0.317981	36.4256	0
	High	IFVGGIkEDTEEYNLr	2	2	1	P51991-2	K7(Lys8); R16(Arg10)	0	1796297	0.98058	2	11.6968	0	0.01253	26.82	0.826783	3	1900.98	1.09987	38.5667	1
	High	IFVGGIKEDTEEYNLR	1	2	1	P51991-2		0	1.67189e+06	1.06196	1		0	0.01417	19.98	4.36606	3	1882.96	1.08173	38.5088	1
	High	WGTLTDcVVmR	1	2	1	P51991-2	C7(Carbamidomethyl); M10(Oxidation)	0	1.31413e+06				0.004	0.1681	20.91	1.90414	2	1353.63	0.657574	36.4496	0
P06748-2	Isoform 2 of Nucleophosmin OS=Homo sapiens GN=NPM1 - [NPM_HUMAN]	658.532	33.21	2	5	5	45	1.49412e+07	1.04535	20	11.7576	265	29.4462	4.61475
	A2	Sequence	# PSMs	# Proteins	# Protein Groups	Protein Group Accessions	Modifications	ΔCn	Area	Light/Heavy	Light/Heavy Count	Light/Heavy Variability [%]	q-Value	PEP	IonScore	Exp Value	Charge	MH+ [Da]	ΔM [ppm]	RT [min]	# Missed Cleavages
	High	cGSGPVHISGQHLVAVEEDAEsEDEEEEDVK	7	2	1	P06748-2	C1(Carbamidomethyl); S22(Phospho)	0	3.49122e+07	1.08981	5	6.02816	0	0.0003823	70.58	7.27287e-05	3	3460.44	1.42626	37.5292	0
	High	cGSGPVHISGQHLVAVEEDAEsEDEEEEDVk	4	2	1	P06748-2	C1(Carbamidomethyl); S22(Phospho); K31(Lys8)	0	3.13625e+07	1.06554	1		0	0.001122	70.39	8.20782e-05	3	3468.46	1.72851	37.5229	0
	High	mSVQPTVSLGGFEITPPVVLr	7	2	1	P06748-2	M1(Oxidation); R21(Arg10)	0	1.12633e+06	1.43021	2	7.53262	0	0.0003145	61.41	0.000223155	2	2253.22	2.05526	56.7671	0
	High	VDNDENEHQLSLR	3	2	1	P06748-2		0	3.49297e+06	0.915765	2	2.86276	0	0.01882	51.83	0.00193628	2	1568.73	1.18428	23.9429	0
	High	mTDQEAIQDLWQWR	4	2	1	P06748-2	M1(Oxidation)	0	1.46741e+06	0.858124	3	2.25022	0	0.003333	51.55	0.00301212	2	1835.84	3.11757	52.1923	0
	High	mSVQPTVSLGGFEITPPVVLR	7	2	1	P06748-2	M1(Oxidation)	0	1.5312e+06	1.44206	1		0	0.001764	47.31	0.00642336	2	2243.21	0.41774	56.7607	0
	High	VDNDENEHQLSLr	6	2	1	P06748-2	R13(Arg10)	0	5.43977e+06	1.01725	4	7.17152	0	0.05539	36.52	0.0684352	2	1578.74	0.501014	24.1977	0
	High	mTDQEAIQDLWQWr	4	2	1	P06748-2	M1(Oxidation); R14(Arg10)	0	1.49752e+06				0	0.006434	33.46	0.185782	2	1845.85	-0.188729	52.3722	0
	High	GPSSVEDIK	2	2	1	P06748-2		0	4.47155e+06	0.989662	2	5.38585	0.003	0.1326	29.44	0.138791	2	931.474	0.633562	20.5338	0
	High	GPSSVEDIk	1	2	1	P06748-2	K9(Lys8)	0	3.74184e+06				0.009	0.2197	26.89	0.291721	2	939.487	0.0670806	20.596	0
E9PCY7	Heterogeneous nuclear ribonucleoprotein H OS=Homo sapiens GN=HNRNPH1 PE=1 SV=1 - [E9PCY7_HUMAN]	646.288	17.02	3	5	5	40	6.12263e+06	1.30016	21	12.2239	429	47.0574	6.34131
	A2	Sequence	# PSMs	# Proteins	# Protein Groups	Protein Group Accessions	Modifications	ΔCn	Area	Light/Heavy	Light/Heavy Count	Light/Heavy Variability [%]	q-Value	PEP	IonScore	Exp Value	Charge	MH+ [Da]	ΔM [ppm]	RT [min]	# Missed Cleavages
	High	STGEAFVQFASQEIAEK	5	3	1	E9PCY7		0	4.11112e+06	0.940683	2	4.19837	0	0.0003688	64.24	0.000171702	2	1841.89	1.71111	48.5817	0
	High	GLPWScSADEVQR	3	3	1	E9PCY7	C6(Carbamidomethyl)	0	2.29201e+06	1.09538	3	16.7001	0	0.001442	59.87	0.000267076	2	1504.69	0.168117	35.9056	0
	High	STGEAFVQFASQEIAEk	3	3	1	E9PCY7	K17(Lys8)	0	4.21099e+06	1.00651	1		0	0.0008013	59.33	0.000557793	2	1849.91	1.15481	48.7275	0
	High	ATENDIYNFFSPLNPVR	7	3	1	E9PCY7		0	2.06004e+06	1.37695	4	2.77756	0	0.0003233	58.8	0.000655767	2	1996.98	0.537458	56.6144	0
	High	HTGPNsPDTANDGFVR	4	3	1	E9PCY7	S6(Phospho)	0	1.07277e+07	1.36844	2	1.93934	0	0.007523	49.77	0.00260223	2	1764.74	1.53309	24.7507	0
	High	VHIEIGPDGr	2	3	1	E9PCY7	R10(Arg10)	0	2.91691e+06	1.18244	2	5.16953	0	0.01142	48.33	0.00261469	2	1102.59	-0.573585	26.6924	0
	High	ATENDIYNFFSPLNPVr	5	3	1	E9PCY7	R17(Arg10)	0	1.5796e+06	1.30415	1		0	0.0009196	47.34	0.00939297	2	2006.99	0.733081	56.7754	0
	High	VHIEIGPDGR	2	3	1	E9PCY7		0	3.42921e+06				0	0.02379	43.46	0.00736634	2	1092.58	0.509339	26.7221	0
	High	HTGPNSPDTANDGFVr	3	3	1	E9PCY7	R16(Arg10)	0	2.07059e+06	1.24995	2	6.34593	0	0.004605	37.12	0.0679601	3	1694.78	0.503987	24.0187	0
	High	HTGPNSPDTANDGFVR	3	3	1	E9PCY7		0	2.7012e+06	1.12368	2	8.82986	0	0.03293	36.61	0.074573	3	1684.77	0.234524	24.0247	0
	High	HTGPNsPDTANDGFVr	3	3	1	E9PCY7	S6(Phospho); R16(Arg10)	0	8.08109e+06	1.30664	2	0.737234	0	0.0351	33.94	0.0983684	2	1774.75	1.74869	24.7065	0
P60709	Actin, cytoplasmic 1 OS=Homo sapiens GN=ACTB PE=1 SV=1 - [ACTB_HUMAN]	628.644	42.4	2	11	11	71	2.03001e+07	1.42174	42	18.8345	375	41.7097	5.47803
	A2	Sequence	# PSMs	# Proteins	# Protein Groups	Protein Group Accessions	Modifications	ΔCn	Area	Light/Heavy	Light/Heavy Count	Light/Heavy Variability [%]	q-Value	PEP	IonScore	Exp Value	Charge	MH+ [Da]	ΔM [ppm]	RT [min]	# Missed Cleavages
	High	DLYANTVLSGGTTmYPGIADR	3	2	1	P60709	M14(Oxidation)	0	3.02668e+06	1.17771	1		0	0.0001455	87.81	1.00919e-06	2	2231.07	0.995026	44.6856	0
	High	DLYANTVLSGGTTmYPGIADr	3	2	1	P60709	M14(Oxidation); R21(Arg10)	0	2.54452e+06	1.24651	2	15.2888	0	0.004917	61.76	0.000421722	2	2241.08	1.33158	44.4892	0
	High	SYELPDGQVITIGNER	3	2	1	P60709		0	1.26298e+07	1.42053	1		0	0.00765	55.98	0.00109721	2	1790.89	0.831382	44.7877	0
	High	GYSFTTTAER	3	2	1	P60709		0	1.64494e+07	1.11191	2	3.6535	0	0.01817	53.85	0.000598572	2	1132.53	0.0563676	26.9569	0
	High	GYSFTTTAEr	3	2	1	P60709	R10(Arg10)	0	1.46025e+07	1.17456	1		0	0.03653	51.16	0.00121003	2	1142.54	0.617898	26.8915	0
	High	SYELPDGQVITIGNEr	4	2	1	P60709	R16(Arg10)	0	9.76528e+06	1.35025	2	8.18002	0	0.007379	49.56	0.00481769	2	1800.9	1.72558	44.6913	0
	High	IWHHTFYNELR	3	2	1	P60709		0	3.23532e+06	1.10846	2	3.26344	0	0.01896	35.73	0.0807916	3	1515.75	0.213791	32.8378	0
	High	QEYDESGPSIVHR	6	2	1	P60709		0	5.3892e+06	1.42294	5	4.109	0	0.06223	35.49	0.0776136	2	1516.7	0.867533	25.3277	0
	High	AGFAGDDAPr	3	2	1	P60709	R10(Arg10)	0	7.52361e+06	1.38722	3	4.8948	0	0.04083	32.76	0.0539462	2	986.457	0.0317324	20.5103	0
	High	QEYDESGPSIVHr	5	2	1	P60709	R13(Arg10)	0	3.54866e+06	1.40356	1		0	0.03029	31.61	0.194095	2	1526.71	0.802707	24.9785	0
	High	TTGIVmDSGDGVTHTVPIYEGYALPHAILr	4	2	1	P60709	M6(Oxidation); R30(Arg10)	0	5.84094e+06	1.63655	2	2.49541	0	0.02543	29.06	0.952844	3	3209.61	-1.13363	48.6668	0
	High	IWHHTFYNELr	3	2	1	P60709	R11(Arg10)	0	3.06209e+06	1.1558	1		0	0.03155	28.47	0.447394	3	1525.76	0.153212	32.5681	0
	High	VAPEEHPVLLTEAPLNPK	6	2	1	P60709		0	3.18212e+07	2.00591	5	3.04793	0	0.0183	28.25	0.423584	2	1954.07	0.936753	38.2793	0
	High	TTGIVmDSGDGVTHTVPIYEGYALPHAILR	4	2	1	P60709	M6(Oxidation)	0	9.15049e+06	1.56368	3	3.43545	0	0.009344	27.98	1.13238	3	3199.62	3.69814	48.6301	0
	High	VAPEEHPVLLTEAPLNPk	4	2	1	P60709	K18(Lys8)	0	1.49813e+07	2.00477	1		0	0.001463	27.47	0.454814	2	1962.08	1.16199	38.3268	0
	High	EITALAPSTmK	2	2	1	P60709	M10(Oxidation)	0	5.62243e+06	1.31752	2	4.69484	0.001	0.08114	45.32	0.00530686	2	1177.61	0.382833	26.5236	0
	High	EITALAPSTMK	2	2	1	P60709		0	3.0223e+06	1.42095	2	20.0956	0.002	0.09115	39.05	0.0263713	2	1161.62	-0.41647	32.1402	0
	High	DLTDYLmk	2	2	1	P60709	M7(Oxidation); K8(Lys8)	0	2.2935e+06	1.24279	2	0.968976	0.003	0.1444	29.16	0.168297	2	1022.5	0.123944	37.1691	0
	High	AVFPSIVGRPR	3	2	1	P60709		0	6.96495e+06	1.62624	3	0.587499	0.003	0.118	19.1	1.60366	2	1198.71	0.341131	34.4602	0
	High	AVFPSIVGrPr	2	2	1	P60709	R9(Arg10); R11(Arg10)	0	4.57541e+06				0.004	0.1693	12.86	5.83084	2	1218.72	0.187358	34.8325	0
	High	EITALAPSTMk	1	2	1	P60709	K11(Lys8)	0	1.82092e+06	1.55518	1		0.006	0.1814	19.43	2.33979	2	1169.63	1.0143	31.7373	0
	High	DLTDYLmK	1	2	1	P60709	M7(Oxidation)	0	2.35624e+06				0.007	0.1929	18.84	1.64904	2	1014.48	0.885179	37.1372	0
	High	AGFAGDDAPR	1	2	1	P60709		0	1.0844e+07				0.007	0.1923	15.49	3.08759	2	976.448	-0.0629974	20.1793	0
A6NLN1	Polypyrimidine tract binding protein 1, isoform CRA_b OS=Homo sapiens GN=PTBP1 PE=1 SV=4 - [A6NLN1_HUMAN]	584.702	13.47	4	4	4	36	9.51591e+06	1.12049	16	12.3969	527	56.4753	9.37842
	A2	Sequence	# PSMs	# Proteins	# Protein Groups	Protein Group Accessions	Modifications	ΔCn	Area	Light/Heavy	Light/Heavy Count	Light/Heavy Variability [%]	q-Value	PEP	IonScore	Exp Value	Charge	MH+ [Da]	ΔM [ppm]	RT [min]	# Missed Cleavages
	High	NNQFQALLQYADPVSAQHAk	6	4	1	A6NLN1	K20(Lys8)	0	2.25618e+07	1.11523	4	0.697444	0	4.171e-05	68.65	7.97462e-05	3	2251.14	0.83445	50.0416	0
	High	IAIPGLAGAGNSVLLVSNLNPER	7	4	1	A6NLN1		0	997511	1.39109	3	9.09982	0	0.0002488	68.14	2.14386e-05	2	2275.29	5.65256	56.877	0
	High	NNQFQALLQYADPVSAQHAK	8	4	1	A6NLN1		0	2.42788e+07	1.07592	2	4.35851	0	0.0002009	62.24	0.000357087	3	2243.12	1.58941	50.0154	0
	High	LSLDGQNIYNAccTLR	3	4	1	A6NLN1	C12(Carbamidomethyl); C13(Carbamidomethyl)	0	1.69778e+06	0.972784	2	12.3887	0	0.004016	50.92	0.00364093	2	1897.89	2.70912	41.3501	0
	High	IAIPGLAGAGNSVLLVSNLNPEr	5	4	1	A6NLN1	R23(Arg10)	0	762699	1.26457	1		0	0.001314	46.72	0.00357953	2	2285.28	-0.447653	56.8794	0
	High	LSLDGQNIYNAccTLr	4	4	1	A6NLN1	C12(Carbamidomethyl); C13(Carbamidomethyl); R16(Arg10)	0	1.86883e+06	0.852104	1		0	0.01309	34.6	0.157869	2	1907.9	0.472216	41.3419	0
	High	GQPIYIQFSNHK	3	4	1	A6NLN1		0	2.40007e+06	1.23416	3	12.7304	0	0.0528	26.53	0.625195	2	1431.74	-1.02219	33.65	0
E9PQ49	Elongation factor 1-delta (Fragment) OS=Homo sapiens GN=EEF1D PE=1 SV=2 - [E9PQ49_HUMAN]	583.493	41.92	7	5	5	29	1.41889e+07	1.15089	15	23.4086	198	21.811	5.52881
	A2	Sequence	# PSMs	# Proteins	# Protein Groups	Protein Group Accessions	Modifications	ΔCn	Area	Light/Heavy	Light/Heavy Count	Light/Heavy Variability [%]	q-Value	PEP	IonScore	Exp Value	Charge	MH+ [Da]	ΔM [ppm]	RT [min]	# Missed Cleavages
	High	KPATPAEDDEDDDIDLFGsDNEEEDKEAAQLR	9	7	1	E9PQ49	S19(Phospho)	0	2.75802e+07	1.27014	4	8.75328	0	6.023e-05	108.97	1.28153e-08	3	3657.53	1.36962	41.7205	1
	High	kPATPAEDDEDDDIDLFGsDNEEEDkEAAQLr	6	7	1	E9PQ49	K1(Lys8); S19(Phospho); K26(Lys8); R32(Arg10)	0	2.25515e+07	1.22087	2	3.81674	0	0.0001767	83.49	4.81672e-06	3	3683.57	2.50734	41.739	1
	High	SLAGSSGPGASSGTSGDHGELVVr	3	7	1	E9PQ49	R24(Arg10)	0	3.58834e+06	0.96669	3	0.427346	0	0.001341	56.42	0.00138223	3	2195.06	1.36672	28.3875	0
	High	IASLEVENQSLr	3	7	1	E9PQ49	R12(Arg10)	0	1.39504e+06	0.83805	2	8.52875	0	0.001815	54.88	0.000844252	2	1368.74	1.2596	33.2028	0
	High	GVVQELQQAISk	1	7	1	E9PQ49	K12(Lys8)	0	981065	0.419376	1		0	0.0545	39.11	0.0221	2	1307.74	0.889111	46.6453	0
	High	IASLEVENQSLR	2	7	1	E9PQ49		0	1.32426e+06	0.84307	1		0	0.03284	28.61	0.356146	2	1358.73	2.23374	32.9479	0
	High	SLAGSSGPGASSGTSGDHGELVVR	3	7	1	E9PQ49		0	3.49583e+06				0	0.01407	27.52	1.12384	3	2185.05	1.1629	28.3749	0
	High	KPATPAEDDEDDDIDLFGsDNEEEDKEAAQLREER	2	7	1	E9PQ49	S19(Phospho)	0	1.13983e+07	1.16457	2	1.75234	0	0.008434	21.05	8.87944	4	4071.72	1.38189	40.6545	2
Q92841	Probable ATP-dependent RNA helicase DDX17 OS=Homo sapiens GN=DDX17 PE=1 SV=2 - [DDX17_HUMAN]	553.003	18.38	5	5	9	35	4.76266e+06	1.16529	21	19.0186	729	80.222	8.26514
	A2	Sequence	# PSMs	# Proteins	# Protein Groups	Protein Group Accessions	Modifications	ΔCn	Area	Light/Heavy	Light/Heavy Count	Light/Heavy Variability [%]	q-Value	PEP	IonScore	Exp Value	Charge	MH+ [Da]	ΔM [ppm]	RT [min]	# Missed Cleavages
	High	APILIATDVASR	3	8	2	B4DLW8;Q92841		0	8.41435e+06	1.06302	2	3.29983	0	0.002724	71.42	8.72179e-06	2	1226.71	0.492209	37.0516	0
	High	APILIATDVASr	3	8	2	B4DLW8;Q92841	R12(Arg10)	0	7.9054e+06	1.01743	1		0	0.002684	70.91	1.1098e-05	2	1236.72	0.316514	36.8723	0
	High	ELAQQVQQVADDYGK	3	5	1	Q92841		0	2.05467e+06	0.99474	3	4.01229	0	0.0008756	65.13	0.000122331	2	1691.83	1.0602	39.4255	0
	High	GDGPIcLVLAPTR	4	8	2	B4DLW8;Q92841	C6(Carbamidomethyl)	0	2.96935e+06	1.18365	1		0	0.0278	54.53	0.000906122	2	1368.73	1.81369	44.3846	0
	High	ELAQQVQQVADDYGk	4	5	1	Q92841	K15(Lys8)	0	2.06465e+06				0	0.008761	52.23	0.00222699	2	1699.84	1.53504	39.4546	0
	High	VLEEANQAINPk	3	5	1	Q92841	K12(Lys8)	0	1.83755e+06	1.41496	2	8.56111	0	0.03867	45.53	0.00649084	2	1333.72	0.763807	26.7262	0
	High	GDGPIcLVLAPTr	3	8	2	B4DLW8;Q92841	C6(Carbamidomethyl); R13(Arg10)	0	2.50864e+06	1.17012	2	1.71348	0	0.02441	43.73	0.0105508	2	1378.74	1.82357	44.2991	0
	High	VLEEANQAINPK	2	5	1	Q92841		0	2.42384e+06	1.30126	1		0	0.03737	36.56	0.0545267	2	1325.71	0.429407	26.2591	0
	High	GTAYTFFTPGNLK	3	5	1	Q92841		0	1.2462e+06	1.8705	3	2.60527	0	0.02027	28.8	0.37333	2	1416.72	0.621933	44.1836	0
	High	SSQSSSQQFSGIGr	1	5	1	Q92841	R14(Arg10)	0	2.07984e+06	1.13822	1		0	0.01335	27.09	0.524056	2	1465.69	0.429428	24.4547	0
	High	SSQSSSQQFSGIGR	1	5	1	Q92841		0	2367329				0	0.01288	16.07	6.51052	2	1455.68	0.745978	24.5053	0
	High	mLDmGFEPQIr	2	8	2	B4DLW8;Q92841	M1(Oxidation); M4(Oxidation); R11(Arg10)	0	1.0431e+06	1.11923	2	12.9242	0.002	0.1098	11.04	17.7912	2	1378.64	1.43135	34.9967	0
	High	ESAAPAAAPTAEAPPPSVVTRPEPQALPSPAIR	1	2	1	Q92841		0	2.90429e+06	100	1		0.003	0.1176	19.14	4.49868	3	3246.73	4.05623	39.7616	0
	High	GVEIcIATPGR	1	8	2	B4DLW8;Q92841	C5(Carbamidomethyl)	0	1.23647e+06	0.944959	1		0.004	0.1668	17.32	3.67277	2	1172.61	0.533494	34.8633	0
	High	mLDmGFEPQIR	1	8	2	B4DLW8;Q92841	M1(Oxidation); M4(Oxidation)	0	891481	0.975871	1		0.004	0.1488	12.6	11.9882	2	1368.63	0.169914	34.7658	0
P22626-2	Isoform A2 of Heterogeneous nuclear ribonucleoproteins A2/B1 OS=Homo sapiens GN=HNRNPA2B1 - [ROA2_HUMAN]	546.93	21.99	2	5	5	28	7.64081e+06	1.14547	17	15.2089	341	35.9839	8.646
	A2	Sequence	# PSMs	# Proteins	# Protein Groups	Protein Group Accessions	Modifications	ΔCn	Area	Light/Heavy	Light/Heavy Count	Light/Heavy Variability [%]	q-Value	PEP	IonScore	Exp Value	Charge	MH+ [Da]	ΔM [ppm]	RT [min]	# Missed Cleavages
	High	IDTIEIITDr	5	2	1	P22626-2	R10(Arg10)	0	3.4906e+06	1.04368	2	11.2328	0	0.00307	76.76	4.21831e-06	2	1198.66	-0.142939	40.4942	0
	High	NmGGPYGGGNYGPGGSGGSGGYGGr	4	2	1	P22626-2	M2(Oxidation); R25(Arg10)	0	3.58465e+06	1.07989	3	6.47867	0	8.361e-05	76.09	8.1758e-06	2	2215.91	0.923697	26.8702	0
	High	NmGGPYGGGNYGPGGSGGSGGYGGR	3	2	1	P22626-2	M2(Oxidation)	0	4.35192e+06	1.14547	1		0	3.277e-05	73.91	1.33618e-05	2	2205.9	1.46686	26.8435	0
	High	IDTIEIITDR	3	2	1	P22626-2		0	3.42708e+06	0.952626	1		0	0.01419	61.04	0.000154143	2	1188.65	1.57496	40.5429	0
	High	GGGGNFGPGPGSNFR	3	2	1	P22626-2		0	1.42912e+07	1.29179	2	1.31293	0	0.05434	33.11	0.103912	2	1377.63	1.00584	28.8508	0
	High	GGNFGFGDSr	1	2	1	P22626-2	R10(Arg10)	0	4.27932e+06	0.911108	1		0	0.05941	32.22	0.0621084	2	1023.45	0.805135	27.9272	0
	High	NMGGPYGGGNYGPGGSGGSGGYGGR	1	2	1	P22626-2		0	1.20341e+06	1.41181	1		0	0.002386	28.88	0.44475	2	2189.91	-0.0640501	30.1748	0
	High	GGGGNFGPGPGSNFr	1	2	1	P22626-2	R15(Arg10)	0	11782406	1.20549	1		0	0.04863	26.7	0.485959	2	1387.64	0.933517	29.2512	0
	High	GFGFVTFDDHDPVDk	2	2	1	P22626-2	K15(Lys8)	0	1.48155e+06	1.11943	2	9.56436	0	0.05042	21.69	2.2125	2	1703.78	1.79827	43.7161	0
	High	NMGGPYGGGNYGPGGSGGSGGYGGr	1	2	1	P22626-2	R25(Arg10)	0	852387				0	0.05911	13.46	16.2835	2	2199.91	-1.27006	30.1875	0
	High	GFGFVTFDDHDPVDK	3	2	1	P22626-2		0	2.00901e+06	1.21783	3	24.5629	0.001	0.08053	20.71	2.7471	2	1695.77	2.04563	43.6125	0
	High	GGNFGFGDSR	1	2	1	P22626-2		0	3.81734e+06				0.003	0.1353	22	0.609189	2	1013.44	0.0590209	28.0057	0
P08238	Heat shock protein HSP 90-beta OS=Homo sapiens GN=HSP90AB1 PE=1 SV=4 - [HS90B_HUMAN]	529.319	12.02	1	6	9	38	3.3316e+07	1.02964	22	7.52674	724	83.2121	5.03369
	A2	Sequence	# PSMs	# Proteins	# Protein Groups	Protein Group Accessions	Modifications	ΔCn	Area	Light/Heavy	Light/Heavy Count	Light/Heavy Variability [%]	q-Value	PEP	IonScore	Exp Value	Charge	MH+ [Da]	ΔM [ppm]	RT [min]	# Missed Cleavages
	High	ELISNASDALDK	2	2	2	P08238;P14625		0	3.02253e+06	1.00459	2	12.4515	0	0.01936	75.43	6.99862e-06	2	1275.64	0.954183	32.3946	0
	High	NPDDITQEEYGEFYk	3	1	1	P08238	K15(Lys8)	0	2.64345e+06	1.23353	2	16.3428	0	0.0006836	62.45	0.000193438	2	1855.81	-0.364168	38.5214	0
	High	EQVANSAFVEr	4	1	1	P08238	R11(Arg10)	0	2.25063e+06	1.00943	1		0	0.02618	55.05	0.000659603	2	1259.63	0.245883	26.2069	0
	High	IEDVGsDEEDDSGK	2	1	1	P08238	S6(Phospho)	0	1.91035e+07	0.998056	2	1.22868	0	0.01381	54.19	0.000312855	2	1574.58	1.41709	20.5226	0
	High	ELISNASDALDk	2	2	2	P08238;P14625	K12(Lys8)	0	3.21193e+06	0.986938	1		0	0.01977	53.06	0.00112777	2	1283.66	0.82287	32.3891	0
	High	NPDDITQEEYGEFYK	3	1	1	P08238		0	2.82842e+06	1.03517	1		0	0.003673	42.67	0.0172311	2	1847.8	1.24078	38.3604	0
	High	ADLINNLGTIAk	3	3	2	P07900;P08238	K12(Lys8)	0	4.61817e+06	0.998816	3	6.5856	0	0.01508	40.43	0.0136675	2	1250.72	0.422158	40.8627	0
	High	IEDVGsDEEDDSGKDK	3	1	1	P08238	S6(Phospho)	0	4.58311e+07	1.03536	2	1.02226	0	0.05386	40.42	0.0128911	2	1817.7	1.91465	18.0939	1
	High	EQVANSAFVER	3	1	1	P08238		0	2.25997e+06	1.02702	2	9.41461	0	0.04487	39.36	0.0255684	2	1249.62	1.10159	26.2244	0
	High	ADLINNLGTIAK	3	3	2	P07900;P08238		0	4.73133e+06				0	0.02721	37.76	0.0274272	2	1242.71	0.652597	40.8682	0
	High	IEDVGsDEEDDSGk	3	1	1	P08238	S6(Phospho); K14(Lys8)	0	1.89175e+07	1.03103	1		0	0.05215	22.27	0.623757	2	1582.59	0.614036	20.0606	0
	High	IEDVGsDEEDDSGkDkk	1	1	1	P08238	S6(Phospho); K14(Lys8); K16(Lys8); K17(Lys8)	0	3.50134e+07	0.933719	1		0	0.06096	19	4.34833	3	1969.84	1.14342	15.7696	2
	High	SIYYITGESk	2	1	1	P08238	K10(Lys8)	0	1.50636e+06	0.967497	1		0.003	0.1341	29.6	0.205096	2	1168.6	1.34211	31.2106	0
	High	IEDVGsDEEDDSGkDk	1	1	1	P08238	S6(Phospho); K14(Lys8); K16(Lys8)	0	3.88625e+07				0.003	0.1407	27.08	0.348772	2	1833.73	0.790438	18.0666	1
	High	SIYYITGESK	1	1	1	P08238		0	1.71755e+06	1.07359	1		0.003	0.1474	20.57	1.57904	2	1160.58	0.964131	30.9368	0
	High	EDQTEYLEEr	1	3	2	P07900;P08238	R10(Arg10)	0	1.73046e+06	1.33884	1		0.003	0.1404	13.63	7.40003	2	1321.58	0.602908	26.3907	0
	High	IEDVGsDEEDDSGKDKK	1	1	1	P08238	S6(Phospho)	0	1.73485e+07	1.36084	1		0.004	0.1549	28.01	0.398	2	1945.79	1.47529	15.0583	2
P07910-4	Isoform 4 of Heterogeneous nuclear ribonucleoproteins C1/C2 OS=Homo sapiens GN=HNRNPC - [HNRPC_HUMAN]	515.761	46.4	6	9	9	35	5.62871e+06	1.03128	21	12.6674	250	27.8045	4.69092
	A2	Sequence	# PSMs	# Proteins	# Protein Groups	Protein Group Accessions	Modifications	ΔCn	Area	Light/Heavy	Light/Heavy Count	Light/Heavy Variability [%]	q-Value	PEP	IonScore	Exp Value	Charge	MH+ [Da]	ΔM [ppm]	RT [min]	# Missed Cleavages
	High	mESEGGADDsAEEGDLLDDDDNEDR	4	6	1	P07910-4	M1(Oxidation); S10(Phospho)	0	2.92455e+06	1.07987	2	0.990453	0	0.0009224	67.38	2.37653e-05	2	2794.96	-0.0533375	33.9684	0
	High	VFIGNLNTLVVK	3	6	1	P07910-4		0	2.79e+06	0.976589	2	7.04532	0	0.0127	58.95	0.000103791	2	1316.79	0.306564	46.5899	0
	High	VFIGNLNTLVVk	3	6	1	P07910-4	K12(Lys8)	0	2.66908e+06	1.02141	1		0	0.004866	56.67	0.000150372	2	1324.81	0.920382	46.8387	0
	High	mESEGGADDsAEEGDLLDDDDNEDr	4	6	1	P07910-4	M1(Oxidation); S10(Phospho); R25(Arg10)	0	3.13414e+06	1.00729	1		0	0.003128	55.53	0.000421667	2	2804.98	2.91749	33.93	0
	High	mIAGQVLDINLAAEPK	3	6	1	P07910-4	M1(Oxidation)	0	2.07593e+06	1.21016	2	6.66472	0	0.003357	46.75	0.00664798	2	1698.91	2.01609	44.2708	0
	High	GFAFVQYVNEr	2	6	1	P07910-4	R11(Arg10)	0	2.03677e+06	0.952792	2	11.7773	0	0.0222	45.52	0.0068649	2	1339.67	0.992924	43.7698	0
	High	mESEGGADDsAEEGDLLDDDDNEDrGDDQLELIk	1	6	1	P07910-4	M1(Oxidation); S10(Phospho); R25(Arg10); K34(Lys8)	0	2.063e+06	1.17709	1		0	0.04312	43.88	0.0326283	3	3824.53	4.6828	44.824	1
	High	mIAGQVLDINLAAEPk	3	6	1	P07910-4	M1(Oxidation); K16(Lys8)	0	1.73118e+06	1.4021	1		0	0.001234	43.62	0.0123879	2	1706.92	0.553578	44.4578	0
	High	mESEGGADDsAEEGDLLDDDDNEDRGDDQLELIKDDEK	3	6	1	P07910-4	M1(Oxidation); S10(Phospho)	0	6.55907e+06	1.07963	3	3.01006	0	0.05919	12.4	40.252	4	4293.68	1.38285	42.0443	2
	High	mESEGGADDsAEEGDLLDDDDNEDrGDDQLELIkDDEk	4	6	1	P07910-4	M1(Oxidation); S10(Phospho); R25(Arg10); K34(Lys8); K38(Lys8)	0	6.03002e+06	0.947152	3	5.99817	0.002	0.09981	20.59	6.9087	3	4319.72	0.702915	41.9638	2
	High	VPPPPPIAR	1	6	1	P07910-4		0	7.19292e+06	1.70999	1		0.003	0.1134	37.1	0.0196642	2	943.573	0.144201	25.6088	0
	High	mESEGGADDsAEEGDLLDDDDNEDRGDDQLELIK	1	6	1	P07910-4	M1(Oxidation); S10(Phospho)	0	2.82878e+06				0.003	0.1222	33.14	0.340139	3	3806.5	2.91098	44.8371	1
	High	EAEEGEDDrDsANGEDDS	1	5	1	P07910-4	R9(Arg10); S11(Phospho)	0	1.04472e+06	1.0247	1		0.003	0.1201	16.51	1.24745	2	2029.67	1.36928	14.8999	1
	High	QkVDSLLENLEk	1	6	1	P07910-4	K2(Lys8); K12(Lys8)	0	1.1434e+06	0.747639	1		0.008	0.2084	31.69	0.124957	2	1431.8	0.708963	38.7968	1
	High	VPPPPPIAr	1	6	1	P07910-4	R9(Arg10)	0	3981785				0.009	0.2265	30.11	0.109004	2	953.581	0.496047	25.6532	0
P26038	Moesin OS=Homo sapiens GN=MSN PE=1 SV=3 - [MOES_HUMAN]	514.888	14.56	1	4	6	22	4.72903e+06	1.3453	14	9.70774	577	67.7778	6.40479
	A2	Sequence	# PSMs	# Proteins	# Protein Groups	Protein Group Accessions	Modifications	ΔCn	Area	Light/Heavy	Light/Heavy Count	Light/Heavy Variability [%]	q-Value	PEP	IonScore	Exp Value	Charge	MH+ [Da]	ΔM [ppm]	RT [min]	# Missed Cleavages
	High	ALTSELANAR	3	1	1	P26038		0	4.67279e+06	1.36409	2	15.0067	0	0.01536	72.08	9.64779e-06	2	1045.56	-0.0526687	27.6424	0
	High	APDFVFYAPr	3	3	2	E7EQR4;P26038	R10(Arg10)	0	3.38533e+06	1.3327	1		0	0.0168	63.45	9.51835e-05	2	1192.6	-0.268195	42.9117	0
	High	APDFVFYAPR	4	3	2	E7EQR4;P26038		0	4.95168e+06	1.55858	2	9.9445	0	0.01424	58.84	0.000274688	2	1182.59	-0.503784	42.9892	0
	High	ALTSELANAr	2	1	1	P26038	R10(Arg10)	0	3.29929e+06	1.38207	1		0	0.008294	57.94	0.000253174	2	1055.57	0.0935825	27.9823	0
	High	IAQDLEmYGVNYFSIK	3	1	1	P26038	M7(Oxidation)	0	1.18774e+06	1.17372	3	3.04587	0	0.0005562	50.94	0.00400676	2	1906.93	1.97836	48.9815	0
	High	IGFPWSEIR	3	3	2	E7EQR4;P26038		0	4.56261e+06	1.3477	3	4.51507	0	0.01099	45.69	0.00511626	2	1104.58	0.621849	48.9381	0
	High	IAQDLEmYGVNYFSIk	2	1	1	P26038	M7(Oxidation); K16(Lys8)	0	979445				0	0.008039	35.92	0.124629	2	1914.94	1.75856	48.878	0
	High	TAmSTPHVAEPAENEQDEQDENGAEASADLR	1	1	1	P26038	M3(Oxidation)	0	934637	100	1		0	0.0004371	27.25	1.74737	3	3328.42	1.83542	30.1565	0
	High	ALELEQEr	1	1	1	P26038	R8(Arg10)	0	2.25486e+06	1.33543	1		0.003	0.1331	39.81	0.0148611	2	997.519	-0.329867	24.9915	0
Q16666-3	Isoform 3 of Gamma-interferon-inducible protein 16 OS=Homo sapiens GN=IFI16 - [IF16_HUMAN]	503.297	14.41	3	7	7	51	9.28206e+06	1.43539	30	12.7906	673	75.8876	9.36377
	A2	Sequence	# PSMs	# Proteins	# Protein Groups	Protein Group Accessions	Modifications	ΔCn	Area	Light/Heavy	Light/Heavy Count	Light/Heavy Variability [%]	q-Value	PEP	IonScore	Exp Value	Charge	MH+ [Da]	ΔM [ppm]	RT [min]	# Missed Cleavages
	High	IIAIANYVcr	3	3	1	Q16666-3	C9(Carbamidomethyl); R10(Arg10)	0	840939	1.23874	2	13.9748	0	0.0282	58.26	0.000304008	2	1202.66	1.09891	40.0802	0
	High	GEFTYYEIQDNTGk	4	3	1	Q16666-3	K14(Lys8)	0	1.82087e+06	0.976517	2	0.0774828	0	0.004429	47.28	0.00545304	2	1672.76	-0.435498	36.5184	0
	High	GEFTYYEIQDNTGK	3	3	1	Q16666-3		0	1.88698e+06	0.981931	1		0	0.008424	46.96	0.0055317	2	1664.75	0.832293	36.2897	0
	High	TTIYEIQDDr	1	3	1	Q16666-3	R10(Arg10)	0	1.61851e+06	0.938273	1		0	0.04529	41.32	0.0165438	2	1263.61	0.0381116	30.5735	0
	High	VSEEQTQPPsPAGAGMSTAMGR	4	3	1	Q16666-3	S10(Phospho)	0	1.05561e+07	1.46907	2	1.21413	0	0.002565	40.51	0.0400274	2	2268.97	1.86965	32.6152	0
	High	EVDATsPAPSTSSTVK	1	3	1	Q16666-3	S6(Phospho)	0	3.07049e+06	1.10494	1		0	0.05599	40.2	0.0270024	2	1656.74	0.973243	21.9091	0
	High	VSEEQTQPPsPAGAGMSTAMGr	3	3	1	Q16666-3	S10(Phospho); R22(Arg10)	0	7.27806e+06	1.4504	1		0	0.00231	38.84	0.061599	2	2278.97	1.44688	32.6242	0
	High	IIAIANYVcR	2	3	1	Q16666-3	C9(Carbamidomethyl)	0	1.14862e+06	1.36588	1		0	0.06265	37.86	0.0315415	2	1192.65	-0.249089	40.1151	0
	High	LTcFELAPk	3	3	1	Q16666-3	C3(Carbamidomethyl); K9(Lys8)	0	1.48295e+06	1.64622	2	4.15967	0	0.03814	37.76	0.0330299	2	1086.57	-0.117757	34.9513	0
	High	VSEEQTQPPsPAGAGmSTAMGr	5	3	1	Q16666-3	S10(Phospho); M16(Oxidation); R22(Arg10)	0	8.32511e+06	1.55113	4	1.41516	0	0.005657	35.86	0.112172	2	2294.97	1.09937	27.5089	0
	High	VSEEQTQPPsPAGAGmSTAmGR	3	3	1	Q16666-3	S10(Phospho); M16(Oxidation); M20(Oxidation)	0	2.23229e+07	1.50128	3	0.979881	0	0.01243	30.9	0.33005	2	2300.95	0.109527	23.6153	0
	High	VSEEQTQPPsPAGAGmSTAMGR	5	3	1	Q16666-3	S10(Phospho); M16(Oxidation)	0	1.95083e+07	1.55236	3	10.4771	0	0.01845	30.56	0.38154	2	2284.96	1.09028	27.2199	0
	High	VSEEQTQPPsPAGAGmSTAmGr	4	3	1	Q16666-3	S10(Phospho); M16(Oxidation); M20(Oxidation); R22(Arg10)	0	1.48239e+07				0	0.02012	25.54	1.19437	2	2310.96	1.49618	23.9793	0
	High	EVDATSPAPSTSSTVK	3	3	1	Q16666-3		0	3.14952e+06	1.3145	3	1.15208	0.001	0.07261	16.67	7.06328	2	1576.77	1.57874	22.0482	0
	High	LTcFELAPK	3	3	1	Q16666-3	C3(Carbamidomethyl)	0	2.37374e+06	1.32665	1		0.002	0.1089	22.46	1.04485	2	1078.56	0.143741	35.1973	0
	High	TPQmPPTTPSSSFFTK	2	3	1	Q16666-3	M4(Oxidation)	0	2.08535e+06	1.42485	2	17.5847	0.002	0.1007	11.51	29.4111	2	1769.84	0.450015	35.7047	0
	High	TTIYEIQDDR	1	3	1	Q16666-3		0	1.5186e+06				0.003	0.1254	39.4	0.0252996	2	1253.6	2.44745	30.5969	0
	High	EVDAtSPAPSTSSTVk	1	3	1	Q16666-3	T5(Phospho); K16(Lys8)	0	2.94312e+06	1.10556	1		0.006	0.1885	10.87	24.3698	2	1664.75	2.11844	21.7024	0
P11021	78 kDa glucose-regulated protein OS=Homo sapiens GN=HSPA5 PE=1 SV=2 - [GRP78_HUMAN]	456.593	14.98	1	6	8	27	5.5278e+06	1.31314	17	24.5286	654	72.2884	5.16064
	A2	Sequence	# PSMs	# Proteins	# Protein Groups	Protein Group Accessions	Modifications	ΔCn	Area	Light/Heavy	Light/Heavy Count	Light/Heavy Variability [%]	q-Value	PEP	IonScore	Exp Value	Charge	MH+ [Da]	ΔM [ppm]	RT [min]	# Missed Cleavages
	High	IINEPTAAAIAYGLDk	3	3	2	P11021;E9PKE3	K16(Lys8)	0	3.27537e+06	1.23561	2	15.236	0	0.0004488	74.69	9.52819e-06	2	1667.91	0.940123	44.1992	0
	High	IINEPTAAAIAYGLDK	3	3	2	P11021;E9PKE3		0	4.21829e+06	1.18297	1		0	0.0002134	57.5	0.000526282	2	1659.9	1.33577	44.1537	0
	High	NQLTSNPENTVFDAK	3	1	1	P11021		0	2.52797e+06	1.31799	3	0.546087	0	0.004619	50.96	0.00316422	2	1677.81	1.66601	34.6157	0
	High	VEIIANDQGNr	3	3	2	P11021;E9PKE3	R11(Arg10)	0	8.87158e+06	1.02211	2	4.4194	0	0.0462	45.08	0.00770552	2	1238.64	0.221194	23.2577	0
	High	SQIFSTASDNQPTVTIK	1	1	1	P11021		0	3.49354e+06	1.40222	1		0	0.003518	44.61	0.0143669	2	1836.93	0.616691	36.7795	0
	High	ITPSYVAFTPEGEr	2	1	1	P11021	R14(Arg10)	0	1.70669e+06	1.55825	2	5.13017	0	0.03989	42.88	0.0165723	2	1576.79	1.90577	37.9299	0
	High	NQLTSNPENTVFDAk	3	1	1	P11021	K15(Lys8)	0	1.90474e+06				0	0.002179	39.07	0.0464053	2	1685.82	1.63505	34.6245	0
	High	TWNDPSVQQDIk	2	1	1	P11021	K12(Lys8)	0	1.27738e+06	1.26409	2	39.3572	0	0.0229	31.54	0.215698	2	1438.71	0.988622	31.7324	0
	High	SQIFSTASDNQPTVTIk	1	1	1	P11021	K17(Lys8)	0	2.49142e+06				0	0.008129	31.43	0.291269	2	1844.95	1.85008	36.7859	0
	High	DAGTIAGLNVmR	1	1	1	P11021	M11(Oxidation)	0	667076	0.975003	1		0	0.03892	23.97	0.892329	2	1233.63	1.27151	32.849	0
	High	VEIIANDQGNR	3	3	2	P11021;E9PKE3		0	8.68071e+06	1.03712	1		0	0.04197	22.89	1.16251	2	1228.63	0.0977732	22.7905	0
	High	IINEPTAAAIAYGLDKR	2	1	1	P11021		0	1.63402e+06	1.17111	2	18.3127	0.001	0.08581	12.83	12.7953	3	1816	1.02028	42.0839	1
B4DLW8	Probable ATP-dependent RNA helicase DDX5 OS=Homo sapiens GN=DDX5 PE=1 SV=1 - [B4DLW8_HUMAN]	456.061	19.63	3	5	9	28	4.55835e+06	1.01743	17	19.1912	535	60.5254	9.0708
	A2	Sequence	# PSMs	# Proteins	# Protein Groups	Protein Group Accessions	Modifications	ΔCn	Area	Light/Heavy	Light/Heavy Count	Light/Heavy Variability [%]	q-Value	PEP	IonScore	Exp Value	Charge	MH+ [Da]	ΔM [ppm]	RT [min]	# Missed Cleavages
	High	APILIATDVASR	3	8	2	B4DLW8;Q92841		0	8.41435e+06	1.06302	2	3.29983	0	0.002724	71.42	8.72179e-06	2	1226.71	0.492209	37.0516	0
	High	APILIATDVASr	3	8	2	B4DLW8;Q92841	R12(Arg10)	0	7.9054e+06	1.01743	1		0	0.002684	70.91	1.1098e-05	2	1236.72	0.316514	36.8723	0
	High	GDGPIcLVLAPTR	4	8	2	B4DLW8;Q92841	C6(Carbamidomethyl)	0	2.96935e+06	1.18365	1		0	0.0278	54.53	0.000906122	2	1368.73	1.81369	44.3846	0
	High	QVSDLISVLR	1	3	1	B4DLW8		0	987594	0.800698	1		0	0.01211	49.58	0.00135765	2	1129.66	0.791004	45.3691	0
	High	TGTAYTFFTPNNIk	2	3	1	B4DLW8	K14(Lys8)	0	1.27995e+06	0.707844	2	3.89608	0	0.02586	45.72	0.00955124	2	1582.8	1.35003	42.5489	0
	High	GDGPIcLVLAPTr	3	8	2	B4DLW8;Q92841	C6(Carbamidomethyl); R13(Arg10)	0	2.50864e+06	1.17012	2	1.71348	0	0.02441	43.73	0.0105508	2	1378.74	1.82357	44.2991	0
	High	TTYLVLDEADr	2	3	1	B4DLW8	R11(Arg10)	0	1.09656e+06	0.807563	2	37.4572	0	0.004534	37.07	0.0472581	2	1305.66	1.0937	37.0392	0
	High	TTYLVLDEADR	1	3	1	B4DLW8		0	895297				0	0.06051	35.78	0.0639991	2	1295.65	1.26605	37.0515	0
	High	ELAQQVQQVAAEYcr	2	3	1	B4DLW8	C14(Carbamidomethyl); R15(Arg10)	0	1.22829e+06	0.910552	2	6.50487	0	0.04327	33.07	0.213914	2	1802.88	2.42536	42.0966	0
	High	LLQLVEDr	3	3	1	B4DLW8	R8(Arg10)	0	2.29134e+06				0.002	0.09944	48.4	0.00155168	2	995.575	-0.812017	34.6973	0
	High	mLDmGFEPQIr	2	8	2	B4DLW8;Q92841	M1(Oxidation); M4(Oxidation); R11(Arg10)	0	1.0431e+06	1.11923	2	12.9242	0.002	0.1098	11.04	17.7912	2	1378.64	1.43135	34.9967	0
	High	GVEIcIATPGR	1	8	2	B4DLW8;Q92841	C5(Carbamidomethyl)	0	1.23647e+06	0.944959	1		0.004	0.1668	17.32	3.67277	2	1172.61	0.533494	34.8633	0
	High	mLDmGFEPQIR	1	8	2	B4DLW8;Q92841	M1(Oxidation); M4(Oxidation)	0	891481	0.975871	1		0.004	0.1488	12.6	11.9882	2	1368.63	0.169914	34.7658	0
Q00839-2	Isoform Short of Heterogeneous nuclear ribonucleoprotein U OS=Homo sapiens GN=HNRNPU - [HNRPU_HUMAN]	350.427	5.58	2	3	3	16	2.87389e+06	1.08316	8	16.8574	806	88.9242	5.78271
	A2	Sequence	# PSMs	# Proteins	# Protein Groups	Protein Group Accessions	Modifications	ΔCn	Area	Light/Heavy	Light/Heavy Count	Light/Heavy Variability [%]	q-Value	PEP	IonScore	Exp Value	Charge	MH+ [Da]	ΔM [ppm]	RT [min]	# Missed Cleavages
	High	NFILDQTNVSAAAQR	3	2	1	Q00839-2		0	4.00292e+06	1.14853	2	11.0915	0	0.0004512	100.76	3.00401e-08	2	1647.85	1.72626	38.3111	0
	High	NFILDQTNVSAAAQr	4	2	1	Q00839-2	R15(Arg10)	0	3.88393e+06	0.924141	1		0	0.002521	84.93	1.13089e-06	2	1657.86	1.51412	38.093	0
	High	YNILGTNTImDk	2	2	1	Q00839-2	M10(Oxidation); K12(Lys8)	0	1.21154e+06	0.865486	2	19.7166	0	0.02976	40.25	0.0259522	2	1406.71	1.10808	35.9823	0
	High	SSGPTSLFAVTVAPPGAR	2	2	1	Q00839-2		0	3.40722e+06	1.10061	1		0	0.05346	21.07	2.73648	2	1714.91	0.242593	45.8701	0
	High	SSGPTSLFAVTVAPPGAr	5	2	1	Q00839-2	R18(Arg10)	0	3.00463e+06	1.20927	2	6.3332	0	0.06153	17.71	5.33971	2	1724.92	1.53344	45.8057	0
E7EQR4	Ezrin OS=Homo sapiens GN=EZR PE=1 SV=3 - [E7EQR4_HUMAN]	345.662	8.02	2	2	4	16	3.8507e+06	1.3327	11	13.3517	586	69.3287	6.16357
	A2	Sequence	# PSMs	# Proteins	# Protein Groups	Protein Group Accessions	Modifications	ΔCn	Area	Light/Heavy	Light/Heavy Count	Light/Heavy Variability [%]	q-Value	PEP	IonScore	Exp Value	Charge	MH+ [Da]	ΔM [ppm]	RT [min]	# Missed Cleavages
	High	QLLTLSSELSQAr	3	2	1	E7EQR4	R13(Arg10)	0	2.03781e+06	0.752486	3	10.5238	0	0.005434	64.32	8.64843e-05	2	1455.81	1.06564	41.8562	0
	High	APDFVFYAPr	3	3	2	E7EQR4;P26038	R10(Arg10)	0	3.38533e+06	1.3327	1		0	0.0168	63.45	9.51835e-05	2	1192.6	-0.268195	42.9117	0
	High	APDFVFYAPR	4	3	2	E7EQR4;P26038		0	4.95168e+06	1.55858	2	9.9445	0	0.01424	58.84	0.000274688	2	1182.59	-0.503784	42.9892	0
	High	IGFPWSEIR	3	3	2	E7EQR4;P26038		0	4.56261e+06	1.3477	3	4.51507	0	0.01099	45.69	0.00511626	2	1104.58	0.621849	48.9381	0
	High	QLLTLSSELSQAR	1	2	1	E7EQR4		0	1.20273e+06				0	0.00853	45.55	0.00693883	2	1445.8	0.375584	41.8439	0
	High	SQEQLAAELAEYTAK	2	2	1	E7EQR4		0	1.23262e+06	1.45372	2	18.4435	0	0.01162	19.81	3.93389	2	1651.82	0.670621	43.4833	0
P09874	Poly [ADP-ribose] polymerase 1 OS=Homo sapiens GN=PARP1 PE=1 SV=4 - [PARP1_HUMAN]	329.077	9.47	1	7	7	23	2.56266e+06	1.21543	16	12.5871	1014	113.012	8.88037
	A2	Sequence	# PSMs	# Proteins	# Protein Groups	Protein Group Accessions	Modifications	ΔCn	Area	Light/Heavy	Light/Heavy Count	Light/Heavy Variability [%]	q-Value	PEP	IonScore	Exp Value	Charge	MH+ [Da]	ΔM [ppm]	RT [min]	# Missed Cleavages
	High	VVSEDFLQDVSASTk	3	1	1	P09874	K15(Lys8)	0	1.99213e+06	1.21367	2	13.7758	0	0.002705	63.92	0.000144381	2	1632.82	1.64228	42.9552	0
	High	VVSEDFLQDVSASTK	3	1	1	P09874		0	2272977	0.959057	1		0	0.00118	57.88	0.000577504	2	1624.81	1.59916	42.949	0
	High	AEPVEVVAPR	3	1	1	P09874		0	2.58841e+06	1.36423	3	4.23471	0	0.03921	43.99	0.00620683	2	1066.59	0.0747215	27.1414	0
	High	TTNFAGILSQGLR	3	1	1	P09874		0	1.89105e+06	1.13873	3	2.52164	0	0.01037	38.41	0.0353174	2	1377.75	0.820242	47.4014	0
	High	QQVPSGESAILDR	2	1	1	P09874		0	2.82659e+06	1.2426	1		0	0.03441	24.71	0.952836	2	1399.72	0.99337	31.126	0
	High	GGSDDSSKDPIDVNYEK	2	1	1	P09874		0	1.31327e+06	1.31382	2	9.59861	0	0.01471	22.07	2.30715	2	1825.81	1.0928	27.2273	1
	High	QQVPSGESAILDr	2	1	1	P09874	R13(Arg10)	0	2.27474e+06	1.14919	1		0	0.04188	14.67	9.42545	2	1409.73	0.229539	31.1379	0
	High	NREELGFRPEYSASQLK	1	1	1	P09874		0	1.25897e+06	1.14049	1		0.001	0.07391	19.64	5.37183	3	2024.02	0.163708	33.3141	1
	High	TLGDFAAEYAk	2	1	1	P09874	K11(Lys8)	0	1.64495e+06	1.19944	1		0.002	0.1092	29.03	0.237174	2	1193.59	0.359434	37.6247	0
	High	TLGDFAAEYAK	2	1	1	P09874		0	1.64782e+06	1.17677	1		0.003	0.1344	14.28	7.11788	2	1185.58	0.085739	37.6129	0
P11388	DNA topoisomerase 2-alpha OS=Homo sapiens GN=TOP2A PE=1 SV=3 - [TOP2A_HUMAN]	328.521	5.75	4	7	7	24	1.13815e+07	1.44525	16	9.7797	1531	174.276	8.71924
	A2	Sequence	# PSMs	# Proteins	# Protein Groups	Protein Group Accessions	Modifications	ΔCn	Area	Light/Heavy	Light/Heavy Count	Light/Heavy Variability [%]	q-Value	PEP	IonScore	Exp Value	Charge	MH+ [Da]	ΔM [ppm]	RT [min]	# Missed Cleavages
	High	NENTEGsPQEDGVELEGLK	3	4	1	P11388	S7(Phospho)	0	8.07462e+06	1.44056	3	11.6433	0	0.001024	73.75	1.56934e-05	2	2124.9	1.16681	36.4521	0
	High	NENTEGsPQEDGVELEGLk	2	4	1	P11388	S7(Phospho); K19(Lys8)	0	5.72555e+06				0	0.00224	59.61	0.000424783	2	2132.91	0.686364	36.8431	0
	High	IKNENTEGsPQEDGVELEGLK	6	4	1	P11388	S9(Phospho)	0	1.27968e+07	1.43601	5	2.37415	0	0.03914	43.11	0.0316036	2	2366.08	2.147	34.0883	1
	High	IkNENTEGsPQEDGVELEGLk	4	4	1	P11388	K2(Lys8); S9(Phospho); K21(Lys8)	0	8.52247e+06	1.44996	1		0	0.04409	32.2	0.423358	2	2382.11	2.5099	34.4276	1
	High	VPDEEENEEsDNEKETEK	2	4	1	P11388	S10(Phospho)	0	1.3273e+07	1.27576	2	7.85793	0	0.03659	24.81	0.707321	2	2229.86	0.412857	16.6763	1
	High	GSVPLSSsPPATHFPDETEITNPVPK	3	4	1	P11388	S8(Phospho)	0	4.64623e+06	1.58329	3	4.66271	0	0.02706	22.54	4.77397	3	2784.32	1.90644	43.5056	0
	High	TLAVSGLGVVGR	1	4	1	P11388		0	561892	1.31092	1		0	0.01749	18.05	1.55265	2	1128.67	0.783907	38.0137	0
	High	VPDEEENEEsDNEk	1	4	1	P11388	S10(Phospho); K14(Lys8)	0	2.07947e+06	1.87946	1		0.002	0.1065	22.65	0.575845	2	1750.65	2.00614	16.962	0
	High	FLEEFITPIVK	1	4	1	P11388		0	0				0.003	0.1461	15.71	4.47513	2	1335.76	2.26645	52.5142	0
	High	VPDEEENEEsDNEkETEk	1	4	1	P11388	S10(Phospho); K14(Lys8); K18(Lys8)	0	9.86776e+06				0.003	0.1377	12.42	14.5376	2	2245.89	1.35367	16.6901	1
P14618	Pyruvate kinase PKM OS=Homo sapiens GN=PKM PE=1 SV=4 - [KPYM_HUMAN]	326.821	17.89	2	6	6	21	2.71979e+06	1.21107	12	19.2485	531	57.9	7.84033
	A2	Sequence	# PSMs	# Proteins	# Protein Groups	Protein Group Accessions	Modifications	ΔCn	Area	Light/Heavy	Light/Heavy Count	Light/Heavy Variability [%]	q-Value	PEP	IonScore	Exp Value	Charge	MH+ [Da]	ΔM [ppm]	RT [min]	# Missed Cleavages
	High	LAPITSDPTEATAVGAVEASFK	5	2	1	P14618		0	1.65739e+06	1.40419	2	5.25806	0	0.002981	62.82	0.000260415	2	2175.12	-1.17014	50.5489	0
	High	NTGIIcTIGPASR	3	2	1	P14618	C6(Carbamidomethyl)	0	2.63612e+06	0.990971	3	1.21356	0	0.005822	61.15	0.000215322	2	1359.71	0.290184	33.3527	0
	High	LAPITSDPTEATAVGAVEASFk	3	2	1	P14618	K22(Lys8)	0	1.18115e+06	1.4032	1		0	7.099e-05	59.39	0.000523787	2	2183.14	2.50676	50.5617	0
	High	NTGIIcTIGPASr	3	2	1	P14618	C6(Carbamidomethyl); R13(Arg10)	0	2.64086e+06				0	0.02337	45.38	0.00751861	2	1369.72	1.64808	33.4188	0
	High	LDIDSPPITAR	2	2	1	P14618		0	2.23069e+06	1.12676	2	1.47994	0	0.01811	35.91	0.0546235	2	1197.65	1.17731	35.2715	0
	High	LDIDSPPITAr	1	2	1	P14618	R11(Arg10)	0	2.09772e+06				0	0.009801	35.21	0.06139	2	1207.66	0.890634	35.2661	0
	High	GVNLPGAAVDLPAVSEK	1	2	1	P14618		0	1.02139e+06	1.13759	1		0	0.01579	31.26	0.215361	2	1636.89	1.33576	43.4169	0
	High	TATESFASDPILYRPVAVALDTK	2	1	1	P14618		0	3.28783e+06	1.31711	2	3.22731	0.002	0.1049	10.07	45.914	3	2465.29	-0.0287266	51.0358	0
	High	GDYPLEAVR	1	2	1	P14618		0	1.24613e+06	1.39974	1		0.004	0.1683	18.26	2.14291	2	1019.52	-0.487469	31.7572	0
P23246	Splicing factor, proline- and glutamine-rich OS=Homo sapiens GN=SFPQ PE=1 SV=2 - [SFPQ_HUMAN]	326.153	8.77	1	4	5	32	6.26665e+06	1.11083	18	22.3682	707	76.1016	9.43701
	A2	Sequence	# PSMs	# Proteins	# Protein Groups	Protein Group Accessions	Modifications	ΔCn	Area	Light/Heavy	Light/Heavy Count	Light/Heavy Variability [%]	q-Value	PEP	IonScore	Exp Value	Charge	MH+ [Da]	ΔM [ppm]	RT [min]	# Missed Cleavages
	High	FGQGGAGPVGGQGPr	3	1	1	P23246	R15(Arg10)	0	7.4585e+06	1.16239	2	4.61271	0	0.01126	46.73	0.00592598	2	1351.67	0.587461	23.2251	0
	High	YGEPGEVFINk	3	1	1	P23246	K11(Lys8)	0	3.57323e+06	1.29507	1		0	0.03619	45.11	0.00671364	2	1260.64	0.369136	33.7741	0
	High	FGQGGAGPVGGQGPR	3	1	1	P23246		0	8.53607e+06	1.14866	1		0	0.01069	42.43	0.0142184	2	1341.67	0.568156	23.1557	0
	High	LFVGNLPADITEDEFKR	4	1	1	P23246		0	4.1736e+06	1.27123	4	6.17221	0	0.04125	42.23	0.0265814	3	1964.02	1.96497	48.0798	1
	High	FATHAAALSVR	6	1	1	P23246		0	2.47804e+06	0.781625	5	4.7242	0	0.01825	38.82	0.0235343	3	1143.63	0.520984	25.9324	0
	High	FATHAAALSVr	6	1	1	P23246	R11(Arg10)	0	3.10877e+06	0.961267	1		0	0.05113	30.22	0.173723	3	1153.63	-0.355403	25.8468	0
	High	YGEPGEVFINK	3	1	1	P23246		0	4.01851e+06	1.11083	2	1.82891	0.001	0.08501	35.31	0.0643945	2	1252.62	0.987218	34.0864	0
	High	LFVGNLPADITEDEFkr	2	1	1	P23246	K16(Lys8); R17(Arg10)	0	3.26984e+06				0.003	0.1437	24.97	1.34883	3	1982.04	0.311454	48.1327	1
	High	AVVIVDDr	2	3	2	Q15233;P23246	R8(Arg10)	0	6.09029e+06	0.926985	2	5.61264	0.007	0.1969	28.53	0.142315	2	896.508	0.107855	24.7195	0
Q13283	Ras GTPase-activating protein-binding protein 1 OS=Homo sapiens GN=G3BP1 PE=1 SV=1 - [G3BP1_HUMAN]	321.811	9.66	1	2	2	15	8.13875e+06	1.11949	9	7.10638	466	52.1321	5.51611
	A2	Sequence	# PSMs	# Proteins	# Protein Groups	Protein Group Accessions	Modifications	ΔCn	Area	Light/Heavy	Light/Heavy Count	Light/Heavy Variability [%]	q-Value	PEP	IonScore	Exp Value	Charge	MH+ [Da]	ΔM [ppm]	RT [min]	# Missed Cleavages
	High	SSsPAPADIAQTVQEDLR	6	1	1	Q13283	S3(Phospho)	0	1.22733e+07	1.12256	4	4.72638	0	8.242e-05	89.83	4.60997e-07	2	1964.9	0.923467	48.617	0
	High	SSsPAPADIAQTVQEDLr	3	1	1	Q13283	S3(Phospho); R18(Arg10)	0	1.07909e+07				0	0.002518	70.42	4.11016e-05	2	1974.91	1.18212	48.608	0
	High	YQDEVFGGFVTEPQEEsEEEVEEPEER	5	1	1	Q13283	S17(Phospho)	0	4.00421e+06	1.13679	4	4.48969	0	0.01604	28.08	1.0267	2	3296.34	1.10437	47.6238	0
	High	YQDEVFGGFVTEPQEEsEEEVEEPEEr	1	1	1	Q13283	S17(Phospho); R27(Arg10)	0	2.25601e+06	0.691329	1		0	0.02112	24.32	2.23912	2	3306.34	-0.809203	47.8887	0
A0A087WTP3	Far upstream element-binding protein 2 OS=Homo sapiens GN=KHSRP PE=1 SV=1 - [A0A087WTP3_HUMAN]	299.415	13.36	2	6	6	23	2.51299e+06	1.28218	15	25.7547	711	72.9823	7.7085
	A2	Sequence	# PSMs	# Proteins	# Protein Groups	Protein Group Accessions	Modifications	ΔCn	Area	Light/Heavy	Light/Heavy Count	Light/Heavy Variability [%]	q-Value	PEP	IonScore	Exp Value	Charge	MH+ [Da]	ΔM [ppm]	RT [min]	# Missed Cleavages
	High	IINDLLQSLR	3	2	1	A0A087WTP3		0	1.14504e+06	0.850137	3	4.6478	0	0.01417	75.11	3.61195e-06	2	1184.7	0.990995	46.3486	0
	High	IGGGIDVPVPR	3	2	1	A0A087WTP3		0	2.23926e+06	1.32876	3	3.07588	0	0.008856	55.48	0.000353641	2	1079.62	0.051785	35.9583	0
	High	IINDLLQSLr	3	2	1	A0A087WTP3	R10(Arg10)	0	1.45668e+06				0	0.01268	47.53	0.00219165	2	1194.71	-0.625518	46.1842	0
	High	VQISPDSGGLPER	3	2	1	A0A087WTP3		0	2.6905e+06	1.49666	3	6.69664	0	0.02152	41.49	0.0191196	2	1354.7	0.377629	30.0068	0
	High	SVSLTGAPESVQK	2	2	1	A0A087WTP3		0	2.32277e+06	1.09207	2	12.8206	0	0.03905	35.92	0.0643228	2	1302.69	0.248652	27.7324	0
	High	SVSLTGAPESVQk	1	2	1	A0A087WTP3	K13(Lys8)	0	2.07278e+06				0	0.0193	35.43	0.0665635	2	1310.7	0.217495	27.6964	0
	High	VQISPDSGGLPEr	2	2	1	A0A087WTP3	R13(Arg10)	0	1.83169e+06				0	0.05339	18.89	3.36363	2	1364.71	1.38208	29.9716	0
	High	mILIQDGSQNTNVDKPLR	3	2	1	A0A087WTP3	M1(Oxidation)	0	1.62092e+06	1.03529	2	6.37335	0	0.017	15.55	13.1226	3	2058.06	-0.593995	31.7972	0
	High	GGGGPGGGGPGGGSAGGPSQPPGGGGPGIR	1	2	1	A0A087WTP3		0	2.52571e+06	1.53287	1		0	0.01684	11.02	53.0269	3	2270.07	0.277585	25.677	0
	High	mILIQDGSQNTNVDkPLr	2	2	1	A0A087WTP3	M1(Oxidation); K15(Lys8); R18(Arg10)	0	1.55241e+06	1.33177	1		0.003	0.1353	12.81	21.9755	3	2076.09	0.936514	31.8576	0
Q9NTI5-2	Isoform 2 of Sister chromatid cohesion protein PDS5 homolog B OS=Homo sapiens GN=PDS5B - [PDS5B_HUMAN]	291.002	4.96	2	4	4	24	6.23769e+06	1.49477	15	10.6689	1391	158.18	8.5874
	A2	Sequence	# PSMs	# Proteins	# Protein Groups	Protein Group Accessions	Modifications	ΔCn	Area	Light/Heavy	Light/Heavy Count	Light/Heavy Variability [%]	q-Value	PEP	IonScore	Exp Value	Charge	MH+ [Da]	ΔM [ppm]	RT [min]	# Missed Cleavages
	High	AEsPESSAIESTQSTPQk	3	2	1	Q9NTI5-2	S3(Phospho); K18(Lys8)	0	6.92254e+06	1.5502	2	0.984309	0	0.002595	65.09	0.000116773	2	1964.86	1.33129	26.3013	0
	High	AEsPESSAIESTQSTPQK	5	2	1	Q9NTI5-2	S3(Phospho)	0	1.0733e+07	1.37473	3	8.57168	0	0.003975	54.35	0.00123756	2	1956.85	2.10516	26.2557	0
	High	AEsPESSAIESTQStPQk	3	2	1	Q9NTI5-2	S3(Phospho); T15(Phospho); K18(Lys8)	0	3.93804e+06	1.31204	1		0	0.003693	41.35	0.0189252	2	2044.83	1.26827	25.4643	0
	High	LkEDILENEDEQNsPPk	3	2	1	Q9NTI5-2	K2(Lys8); S14(Phospho); K17(Lys8)	0	3.45116e+06	1.55565	2	4.72248	0	0.013	39.56	0.0563659	2	2093.96	-0.60455	30.9012	1
	High	AEsPESSAIESTQStPQK	3	2	1	Q9NTI5-2	S3(Phospho); T15(Phospho)	0	5.57867e+06	1.38395	2	3.45968	0	0.0009788	37.94	0.0355616	2	2036.81	0.273483	25.798	0
	High	LKEDILENEDEQNsPPK	4	2	1	Q9NTI5-2	S14(Phospho)	0	5.85396e+06	1.6843	3	1.04585	0	0.05945	28.91	0.589818	2	2077.94	1.8955	30.8577	1
	High	mETVSNASSSsNPSSPGR	2	2	1	Q9NTI5-2	M1(Oxidation); S11(Phospho)	0	2.12609e+06	1.34583	1		0	0.05618	18.98	2.61168	2	1890.75	0.376971	17.2118	0
	High	GHTAsESDEQQWPEEK	1	2	1	Q9NTI5-2	S5(Phospho)	0	1987598	1.44987	1		0.001	0.07697	24.45	0.718023	2	1937.76	0.792166	24.3051	0
P26641	Elongation factor 1-gamma OS=Homo sapiens GN=EEF1G PE=1 SV=3 - [EF1G_HUMAN]	268.795	13.5	2	5	5	19	3.07313e+06	1.02964	13	9.13439	437	50.0871	6.66846
	A2	Sequence	# PSMs	# Proteins	# Protein Groups	Protein Group Accessions	Modifications	ΔCn	Area	Light/Heavy	Light/Heavy Count	Light/Heavy Variability [%]	q-Value	PEP	IonScore	Exp Value	Charge	MH+ [Da]	ΔM [ppm]	RT [min]	# Missed Cleavages
	High	ALIAAQYSGAQVR	3	2	1	P26641		0	4.60667e+06	0.946383	2	5.40676	0	0.001347	77.93	3.50718e-06	2	1347.74	0.34845	31.8991	0
	High	ALIAAQYSGAQVr	3	2	1	P26641	R13(Arg10)	0	5.07489e+06	0.907738	1		0	0.000741	74.3	8.1552e-06	2	1357.75	0.728914	32.1176	0
	High	WFLTcINQPQFr	2	2	1	P26641	C5(Carbamidomethyl); R12(Arg10)	0	626434	1.26147	2	27.8738	0	0.01697	19.93	3.83736	2	1619.81	1.54283	49.9113	0
	High	ILGLLDAYLk	3	2	1	P26641	K10(Lys8)	0	986106	1.04124	3	1.24125	0.001	0.08288	37.52	0.0119836	2	1126.7	1.29505	54.2648	0
	High	kLDPGSEETQTLVr	2	2	1	P26641	K1(Lys8); R14(Arg10)	0	1.97734e+06				0.001	0.06857	18.02	4.92057	2	1590.85	1.57565	28.1746	1
	High	STFVLDEFKR	2	2	1	P26641		0	2.10854e+06	1.23005	2	23.4235	0.002	0.1075	35.22	0.0684033	2	1241.65	0.780155	38.148	1
	High	STFVLDEFkr	1	2	1	P26641	K9(Lys8); R10(Arg10)	0	1845366	0.968243	1		0.003	0.1301	26.01	0.537811	2	1259.68	1.15101	38.0307	1
	High	KLDPGSEETQTLVR	2	2	1	P26641		0	2.03595e+06	0.96569	2	9.52841	0.003	0.1338	25.06	1.00958	2	1572.82	0.744462	28.1928	1
	High	WFLTcINQPQFR	1	2	1	P26641	C5(Carbamidomethyl)	0	962367				0.007	0.1985	18.43	5.0845	2	1609.79	-0.590554	49.9554	0
O00148	ATP-dependent RNA helicase DDX39A OS=Homo sapiens GN=DDX39A PE=1 SV=2 - [DX39A_HUMAN]	266.169	12.65	3	5	5	17	2.68155e+06	0.878241	13	14.6776	427	49.098	5.68115
	A2	Sequence	# PSMs	# Proteins	# Protein Groups	Protein Group Accessions	Modifications	ΔCn	Area	Light/Heavy	Light/Heavy Count	Light/Heavy Variability [%]	q-Value	PEP	IonScore	Exp Value	Charge	MH+ [Da]	ΔM [ppm]	RT [min]	# Missed Cleavages
	High	ILVATNLFGR	3	3	1	O00148		0	3.7925e+06	0.876521	2	0.290593	0	0.005722	62.87	5.46369e-05	2	1103.66	0.167562	44.4846	0
	High	ILVATNLFGr	1	3	1	O00148	R10(Arg10)	0	4.15181e+06	0.842901	1		0	0.008514	60.26	0.000105821	2	1113.67	0.0849829	44.586	0
	High	GLAITFVSDENDAK	3	3	1	O00148		0	1.53823e+06	1.10827	3	7.6531	0	0.004136	50.73	0.00268249	2	1479.73	0.543839	39.9947	0
	High	GSYVSIHSSGFr	2	3	1	O00148	R12(Arg10)	0	2.06566e+06	0.712782	2	16.4589	0	0.006775	41.91	0.0157016	2	1306.64	0.260922	28.7269	0
	High	GSYVSIHSSGFR	4	3	1	O00148		0	1.40523e+06	0.869589	2	3.77274	0	0.04259	27.33	0.446321	2	1296.63	0.897433	28.738	0
	High	GLAITFVSDENDAk	1	3	1	O00148	K14(Lys8)	0	1.49279e+06				0	0.01019	25.66	0.802572	2	1487.75	1.08915	39.9874	0
	High	DFLLkPELLr	1	3	1	O00148	K5(Lys8); R10(Arg10)	0	1.18551e+06	1.15208	1		0.001	0.08807	18.4	1.17297	2	1261.76	0.818374	46.2138	0
	High	ELAFQISK	1	3	1	O00148		0	1.45059e+06	1.53963	1		0.003	0.1342	33.12	0.0610629	2	935.52	0.325803	34.2084	0
	High	DFLLKPELLR	1	3	1	O00148		0	1.82718e+06	1.15717	1		0.009	0.2169	21.75	0.763917	2	1243.74	-0.538156	46.376	0
E9PK09	Bcl-2-associated transcription factor 1 (Fragment) OS=Homo sapiens GN=BCLAF1 PE=1 SV=4 - [E9PK09_HUMAN]	261.137	4.28	7	2	2	12	1.05951e+07	0.997959	6	22.7421	725	83.0857	10.1401
	A2	Sequence	# PSMs	# Proteins	# Protein Groups	Protein Group Accessions	Modifications	ΔCn	Area	Light/Heavy	Light/Heavy Count	Light/Heavy Variability [%]	q-Value	PEP	IonScore	Exp Value	Charge	MH+ [Da]	ΔM [ppm]	RT [min]	# Missed Cleavages
	High	FNDsEGDDTEETEDYr	3	7	1	E9PK09	S4(Phospho); R16(Arg10)	0	4.16023e+06	0.871937	2	0.637725	0	0.0002558	71.29	6.14477e-06	2	2011.7	1.42984	27.4116	0
	High	FNDsEGDDTEETEDYR	3	7	1	E9PK09	S4(Phospho)	0	3.54705e+06	0.819287	1		0	0.007844	65.02	2.64883e-05	2	2001.69	2.45784	27.4559	0
	High	YsPSQNsPIHHIPSR	3	7	1	E9PK09	S2(Phospho); S7(Phospho)	0	1.70301e+07	1.18098	1		0	0.05173	19.97	2.8466	3	1879.79	0.914036	27.3329	0
	High	ySPSQNsPIHHIPSr	3	7	1	E9PK09	Y1(Phospho); S7(Phospho); R15(Arg10)	0	1.44203e+07	1.15618	2	2.44195	0	0.04085	15.59	8.18097	3	1889.8	0.376961	27.324	0
P14625	Endoplasmin OS=Homo sapiens GN=HSP90B1 PE=1 SV=1 - [ENPL_HUMAN]	260.563	7.22	1	4	5	17	2.36791e+06	1.41023	12	29.2461	803	92.4113	4.84326
	A2	Sequence	# PSMs	# Proteins	# Protein Groups	Protein Group Accessions	Modifications	ΔCn	Area	Light/Heavy	Light/Heavy Count	Light/Heavy Variability [%]	q-Value	PEP	IonScore	Exp Value	Charge	MH+ [Da]	ΔM [ppm]	RT [min]	# Missed Cleavages
	High	ELISNASDALDK	2	2	2	P08238;P14625		0	3.02253e+06	1.00459	2	12.4515	0	0.01936	75.43	6.99862e-06	2	1275.64	0.954183	32.3946	0
	High	SILFVPTSAPR	3	1	1	P14625		0	2.29266e+06	1.38735	3	0.886636	0	0.004599	57.31	0.000301429	2	1187.68	-0.26538	40.9801	0
	High	ELISNASDALDk	2	2	2	P08238;P14625	K12(Lys8)	0	3.21193e+06	0.986938	1		0	0.01977	53.06	0.00112777	2	1283.66	0.82287	32.3891	0
	High	GVVDSDDLPLNVSR	3	1	1	P14625		0	1.59914e+06	1.89169	3	32.6195	0	0.00591	49.73	0.00317647	2	1485.75	0.000558639	38.7477	0
	High	SILFVPTSAPr	3	1	1	P14625	R11(Arg10)	0	1.59801e+06				0	0.06232	29.06	0.179729	2	1197.69	1.19028	40.9986	0
	High	DISTNYYASQk	1	1	1	P14625	K11(Lys8)	0	847465	1.34329	1		0	0.05971	26.44	0.474856	2	1297.62	3.85507	26.1431	0
	High	LSLNIDPDAK	2	1	1	P14625		0	1.19203e+06	1.90078	2	25.2313	0.001	0.07676	32.62	0.0982988	2	1085.58	-0.097217	36.0717	0
	High	DISTNYYASQK	1	1	1	P14625		0	1.27781e+06				0.002	0.1068	10.25	19.4241	2	1289.6	2.39464	26.1376	0
P06400	Retinoblastoma-associated protein OS=Homo sapiens GN=RB1 PE=1 SV=2 - [RB_HUMAN]	246.118	19.83	1	10	10	47	8.84362e+07	1.43904	33	44.3342	928	106.092	7.94287
	A2	Sequence	# PSMs	# Proteins	# Protein Groups	Protein Group Accessions	Modifications	ΔCn	Area	Light/Heavy	Light/Heavy Count	Light/Heavy Variability [%]	q-Value	PEP	IonScore	Exp Value	Charge	MH+ [Da]	ΔM [ppm]	RT [min]	# Missed Cleavages
	High	KTAATAAAAAAEPPAPPPPPPPEEDPEQDsGPEDLPLVR	11	1	1	P06400	S30(Phospho)	0	6.22057e+07	2.1648	8	51.838	0	4.257e-05	72.39	6.93389e-05	3	3976.89	1.23757	42.7385	1
	High	EGPTDHLESAcPLNLPLQNNHTAADmYLsPVRsPK	2	1	1	P06400	C11(Carbamidomethyl); M26(Oxidation); S29(Phospho); S33(Phospho)	0	4.5892e+07	1.49637	2	0.6617	0	0.00456	43.78	0.0567528	4	4048.8	0.625129	45.1389	1
	High	DREGPTDHLESAcPLNLPLQNNHTAADmYLsPVRsPK	4	1	1	P06400	C13(Carbamidomethyl); M28(Oxidation); S31(Phospho); S35(Phospho)	0	2.56946e+07	1.36772	3	6.80376	0	0.05531	39.8	0.146807	4	4319.93	1.28811	43.8306	2
	High	DrEGPTDHLESAcPLNLPLQNNHtAADmYLSPVrsPk	3	1	1	P06400	R2(Arg10); C13(Carbamidomethyl); T24(Phospho); M28(Oxidation); R34(Arg10); S35(Phospho); K37(Lys8)	0	1.90329e+07	1.2943	2	2.13559	0	0.06026	35.21	0.42521	4	4347.96	2.0716	44.0972	2
	High	IPGGNIYIsPLKsPYK	5	1	1	P06400	S9(Phospho); S13(Phospho)	0	1.57211e+08	1.29618	2	8.135	0	0.007435	24.77	1.62529	3	1906.91	1.1475	42.8208	1
	High	TAATAAAAAAEPPAPPPPPPPEEDPEQDsGPEDLPLVR	2	1	1	P06400	S29(Phospho)	0	2.39877e+07	3.59415	2	11.4813	0	0.01197	23.45	5.93739	3	3848.79	0.200214	45.5814	0
	High	EGPTDHLESAcPLNLPLQNNHTAADmYLsPVrsPk	2	1	1	P06400	C11(Carbamidomethyl); M26(Oxidation); S29(Phospho); R32(Arg10); S33(Phospho); K35(Lys8)	0	2.93233e+07				0	0.02262	21.58	9.22367	4	4066.81	-2.14087	45.0705	1
	High	VNSTANAETQATSAFQTQKPLK	2	1	1	P06400		0	2.13647e+06	1.07132	2	2.31888	0	0.009066	20.26	5.27034	3	2335.19	0.6867	32.7971	0
	High	TNILQYASTRPPtLSPIPHIPRsPYK	4	1	1	P06400	T13(Phospho); S23(Phospho)	0	7.57517e+06	2.01806	3	7.7871	0	0.01752	19.2	10.0215	4	3107.55	1.33592	48.3176	1
	High	IPGGNIYIsPLksPYk	6	1	1	P06400	S9(Phospho); K12(Lys8); S13(Phospho); K16(Lys8)	0	1.12742e+08	1.42901	4	7.84691	0	0.05086	16.25	11.6114	3	1922.94	0.335759	43.0137	1
	High	VSSVDGVLGGYIQk	2	1	1	P06400	K14(Lys8)	0	832743	0.678114	2	1.54055	0	0.03003	13.69	10.4347	2	1429.78	1.3851	40.3731	0
	High	VNSTANAETQATSAFQTQkPLk	1	1	1	P06400	K19(Lys8); K22(Lys8)	0	1.76122e+06				0	0.06181	11.11	38.3823	3	2351.22	0.960484	32.8396	0
	High	TNILQYASTrPPTLsPIPHIPrSPyk	1	1	1	P06400	R10(Arg10); S15(Phospho); R22(Arg10); Y25(Phospho); K26(Lys8)	0	4.47113e+06	1.86258	1		0.002	0.09653	10.4	67.3155	3	3135.58	-0.513062	48.3689	1
	High	TLQTDSIDsFETQRTPR	1	1	1	P06400	S9(Phospho)	0	2.43729e+06	1.24485	1		0.004	0.1644	20	4.9785	3	2074.95	1.06121	35.2027	1
	High	AVGQGcVEIGSQr	1	1	1	P06400	C6(Carbamidomethyl); R13(Arg10)	0	1.07158e+06	0.722791	1		0.009	0.2231	10.89	21.4878	2	1370.67	0.394493	24.8124	0
D6R9P3	Heterogeneous nuclear ribonucleoprotein A/B OS=Homo sapiens GN=HNRNPAB PE=1 SV=1 - [D6R9P3_HUMAN]	242.636	8.57	6	1	2	13	2.30409e+06	1.0945	6	9.96336	280	30.284	7.91357
	A2	Sequence	# PSMs	# Proteins	# Protein Groups	Protein Group Accessions	Modifications	ΔCn	Area	Light/Heavy	Light/Heavy Count	Light/Heavy Variability [%]	q-Value	PEP	IonScore	Exp Value	Charge	MH+ [Da]	ΔM [ppm]	RT [min]	# Missed Cleavages
	High	IFVGGLNPEATEEK	4	6	1	D6R9P3		0	2.49983e+06	1.21992	3	1.39105	0	0.00449	57.29	0.000540597	2	1503.77	0.851174	37.0131	0
	High	FGEVVDcTIk	3	6	2	D6R9P3;D6RAF8	C7(Carbamidomethyl); K10(Lys8)	0	2.05195e+06	1.09604	1		0	0.03784	56.04	0.000531744	2	1175.59	0.455041	32.4772	0
	High	IFVGGLNPEATEEk	3	6	1	D6R9P3	K14(Lys8)	0	2.03005e+06				0	0.01257	44.32	0.0112909	2	1511.78	0.336493	36.8971	0
	High	FGEVVDcTIK	3	6	2	D6R9P3;D6RAF8	C7(Carbamidomethyl)	0	2.10835e+06	1.01725	2	7.06729	0	0.03544	43.64	0.00917146	2	1167.57	0.386882	32.4826	0
Q9H1E3	Nuclear ubiquitous casein and cyclin-dependent kinase substrate 1 OS=Homo sapiens GN=NUCKS1 PE=1 SV=1 - [NUCKS_HUMAN]	242.627	14.4	1	3	3	14	2.77752e+06	1.23682	9	11.6811	243	27.28	5.08447
	A2	Sequence	# PSMs	# Proteins	# Protein Groups	Protein Group Accessions	Modifications	ΔCn	Area	Light/Heavy	Light/Heavy Count	Light/Heavy Variability [%]	q-Value	PEP	IonScore	Exp Value	Charge	MH+ [Da]	ΔM [ppm]	RT [min]	# Missed Cleavages
	High	VVDYSQFQEsDDADEDYGr	4	1	1	Q9H1E3	S10(Phospho); R19(Arg10)	0	3.39875e+06	1.1656	3	8.81037	0	0.001047	52.77	0.00107486	2	2327.89	1.08322	35.661	0
	High	KVVDYSQFQEsDDADEDYGR	5	1	1	Q9H1E3	S11(Phospho)	0	2.99444e+06	1.35819	5	12.6994	0	0.009935	49.8	0.00365029	2	2445.98	1.41747	33.0427	1
	High	kVVDYSQFQEsDDADEDYGr	1	1	1	Q9H1E3	K1(Lys8); S11(Phospho); R20(Arg10)	0	1.79187e+06				0	0.02517	42.74	0.0208507	2	2464	1.50332	33.4265	1
	High	VVDYSQFQEsDDADEDYGR	3	1	1	Q9H1E3	S10(Phospho)	0	3.74174e+06				0	0.01178	42.52	0.0116234	2	2317.88	3.07544	35.4295	0
	High	NSQEDSEDsEDkDVk	1	1	1	Q9H1E3	S9(Phospho); K12(Lys8); K15(Lys8)	0	1.59639e+06	1.2935	1		0.006	0.1728	18.09	2.32082	2	1820.71	1.41832	13.8746	1
M0QXS5	Heterogeneous nuclear ribonucleoprotein L (Fragment) OS=Homo sapiens GN=HNRNPL PE=1 SV=1 - [M0QXS5_HUMAN]	242.017	6.79	2	2	2	7	7.86269e+06	1.44581	4	3.74547	530	58.4353	6.78564
	A2	Sequence	# PSMs	# Proteins	# Protein Groups	Protein Group Accessions	Modifications	ΔCn	Area	Light/Heavy	Light/Heavy Count	Light/Heavy Variability [%]	q-Value	PEP	IonScore	Exp Value	Charge	MH+ [Da]	ΔM [ppm]	RT [min]	# Missed Cleavages
	High	NDQDTWDYTNPNLSGQGDPGSNPNkr	2	2	1	M0QXS5	K25(Lys8); R26(Arg10)	0	9.68087e+06	1.48329	1		0	0.00021	82.96	4.37892e-06	3	2908.29	1.62488	33.4329	1
	High	NDQDTWDYTNPNLSGQGDPGSNPNKR	3	2	1	M0QXS5		0	1.45884e+07	1.44581	2	3.69564	0	0.0004053	68.09	0.000127847	3	2890.27	1.74305	33.4783	1
	High	TPASPVVHIR	1	2	1	M0QXS5		0	1.13694e+06	1.0179	1		0.001	0.08322	29.83	0.12869	3	1076.62	-0.0217325	24.8181	0
	High	TPASPVVHIr	1	2	1	M0QXS5	R10(Arg10)	0	980919				0.006	0.1878	12.06	8.45706	3	1086.63	-0.188877	24.9542	0
P09651-3	Isoform 2 of Heterogeneous nuclear ribonucleoprotein A1 OS=Homo sapiens GN=HNRNPA1 - [ROA1_HUMAN]	239.451	28.46	4	5	5	24	8.90443e+06	1.08117	14	13.3651	267	29.3682	9.14404
	A2	Sequence	# PSMs	# Proteins	# Protein Groups	Protein Group Accessions	Modifications	ΔCn	Area	Light/Heavy	Light/Heavy Count	Light/Heavy Variability [%]	q-Value	PEP	IonScore	Exp Value	Charge	MH+ [Da]	ΔM [ppm]	RT [min]	# Missed Cleavages
	High	SSGPYGGGGQYFAKPR	4	4	1	P09651-3		0	4.93985e+06	1.12962	3	2.43644	0	0.001374	77.3	6.55455e-06	2	1628.78	1.06306	27.9149	0
	High	NQGGYGGSSSSSSYGSGr	3	4	1	P09651-3	R18(Arg10)	0	1.99815e+07	0.877505	3	12.979	0	0.002756	67.99	3.51943e-05	2	1704.71	0.865934	16.0514	0
	High	IEVIEImTDR	2	4	1	P09651-3	M7(Oxidation)	0	1.79197e+06	0.976413	2	23.0528	0	0.01349	50.05	0.0021674	2	1234.64	1.26664	35.4606	0
	High	SSGPYGGGGQYFAkPr	5	4	1	P09651-3	K14(Lys8); R16(Arg10)	0	4.17583e+06	1.16808	2	15.6214	0	0.01793	31.04	0.298408	2	1646.81	1.56601	27.9088	0
	High	NQGGYGGSSSSSSYGSGR	1	4	1	P09651-3		0	1.75338e+07				0	0.01072	26.49	0.491635	2	1694.7	1.42854	15.5073	0
	High	SHFEQWGTLTDcVVmR	3	4	1	P09651-3	C12(Carbamidomethyl); M15(Oxidation)	0	1.33794e+06	0.961258	2	31.2198	0	0.0004331	25.38	1.28425	3	1981.89	0.944708	40.9418	0
	High	SHFEQWGTLTDcVVmr	3	4	1	P09651-3	C12(Carbamidomethyl); M15(Oxidation); R16(Arg10)	0	1.21917e+06	0.962921	1		0	0.0307	23.61	2.11637	3	1991.9	1.44618	40.88	0
	High	LFIGGLSFETTDESLR	1	4	1	P09651-3		0	215404	1.12033	1		0	0.04333	13.81	16.9463	2	1784.91	1.68199	52.3911	0
	High	IEVIEImTDr	2	4	1	P09651-3	M7(Oxidation); R10(Arg10)	0	1.62372e+06				0.003	0.1105	20.6	1.92875	2	1244.64	-0.385312	35.5001	0
Q8IYB3	Serine/arginine repetitive matrix protein 1 OS=Homo sapiens GN=SRRM1 PE=1 SV=2 - [SRRM1_HUMAN]	239.21	8.19	3	6	6	20	1.78669e+07	1.31437	14	64.0058	904	102.274	11.8394
	A2	Sequence	# PSMs	# Proteins	# Protein Groups	Protein Group Accessions	Modifications	ΔCn	Area	Light/Heavy	Light/Heavy Count	Light/Heavy Variability [%]	q-Value	PEP	IonScore	Exp Value	Charge	MH+ [Da]	ΔM [ppm]	RT [min]	# Missed Cleavages
	High	KEtESEAEDNLDDLEK	4	3	1	Q8IYB3	T3(Phospho)	0	5.98011e+06	1.14713	3	0.709406	0	0.01507	72.35	1.63455e-05	2	1944.8	1.86332	33.2887	1
	High	kEtESEAEDNLDDLEk	3	3	1	Q8IYB3	K1(Lys8); T3(Phospho); K16(Lys8)	0	4.73824e+06	1.20309	1		0	0.01308	56.18	0.000789847	2	1960.83	1.49719	32.9276	1
	High	kEtEsEAEDNLDDLEk	3	3	1	Q8IYB3	K1(Lys8); T3(Phospho); S5(Phospho); K16(Lys8)	0	1.82324e+06	0.879586	3	1.90639	0	0.05515	31.22	0.153661	2	2040.79	2.0257	35.3452	1
	High	KPPAPPsPVQSQsPSTNWSPAVPVKK	4	3	1	Q8IYB3	S7(Phospho); S13(Phospho)	0	9.39554e+06	2.02093	2	7.27511	0	0.04054	27.16	1.66434	3	2871.39	0.955907	35.6047	1
	High	RRtPsPPPR	1	3	1	Q8IYB3	T3(Phospho); S5(Phospho)	0	2.85164e+07	1.3187	1		0	0.055	18.35	2.23421	3	1223.54	0.247418	13.8864	2
	High	KEtEsEAEDNLDDLEK	1	3	1	Q8IYB3	T3(Phospho); S5(Phospho)	0	1.34822e+06				0	0.06223	17.64	3.00638	2	2024.77	2.6227	35.3517	1
	High	KPPAPPsPVQSQsPSTNWSPAVPVK	2	3	1	Q8IYB3	S7(Phospho); S13(Phospho)	0	1.27341e+07	100	2	0	0	0.0436	10.68	75.4596	3	2743.3	2.49096	38.8662	0
	High	HRPsPPAtPPPK	1	2	1	Q8IYB3	S4(Phospho); T8(Phospho)	0	7183849	2.68103	1		0.004	0.1567	15.94	5.14205	2	1441.64	0.684552	15.2476	0
	High	RRsPsPAPPPR	1	3	1	Q8IYB3	S3(Phospho); S5(Phospho)	0	1.23502e+07	3.13861	1		0.009	0.2218	24.35	0.754398	3	1377.62	0.115712	13.8124	2
Q09028-4	Isoform 4 of Histone-binding protein RBBP4 OS=Homo sapiens GN=RBBP4 - [RBBP4_HUMAN]	237.917	8.46	4	3	3	10	1.77084e+06	0.849555	7	10.3754	390	43.455	4.95752
	A2	Sequence	# PSMs	# Proteins	# Protein Groups	Protein Group Accessions	Modifications	ΔCn	Area	Light/Heavy	Light/Heavy Count	Light/Heavy Variability [%]	q-Value	PEP	IonScore	Exp Value	Charge	MH+ [Da]	ΔM [ppm]	RT [min]	# Missed Cleavages
	High	TPSSDVLVFDYTk	3	4	1	Q09028-4	K13(Lys8)	0	2.83545e+06	0.900268	2	0.085837	0	0.01308	65.31	8.73168e-05	2	1479.75	1.99664	42.205	0
	High	TPSSDVLVFDYTK	3	4	1	Q09028-4		0	2.48325e+06	0.792284	1		0	0.008438	56.8	0.000652801	2	1471.73	-0.20556	42.1991	0
	High	TVALWDLr	2	4	1	Q09028-4	R8(Arg10)	0	1.64892e+06	0.643323	2	8.05464	0	0.05937	53.33	0.000655199	2	983.554	-1.12019	43.7599	0
	High	GEFGGFGSVSGk	2	4	1	Q09028-4	K12(Lys8)	0	828158	0.899502	2	8.485	0	0.02473	24.01	0.716335	2	1136.55	0.672536	33.1406	0
P25705-2	Isoform 2 of ATP synthase subunit alpha, mitochondrial OS=Homo sapiens GN=ATP5A1 - [ATPA_HUMAN]	229.268	14.12	2	6	6	23	2.48705e+06	1.46681	15	22.4524	503	54.4597	8.23584
	A2	Sequence	# PSMs	# Proteins	# Protein Groups	Protein Group Accessions	Modifications	ΔCn	Area	Light/Heavy	Light/Heavy Count	Light/Heavy Variability [%]	q-Value	PEP	IonScore	Exp Value	Charge	MH+ [Da]	ΔM [ppm]	RT [min]	# Missed Cleavages
	High	VVDALGNAIDGk	3	2	1	P25705-2	K12(Lys8)	0	1.6787e+06	1.51616	2	4.76884	0	0.003876	60.66	0.000157801	2	1179.65	-0.480618	32.534	0
	High	VVDALGNAIDGK	3	2	1	P25705-2		0	2.46465e+06	1.34752	1		0	0.04033	41.39	0.0134148	2	1171.63	0.486942	32.4584	0
	High	TGAIVDVPVGEELLGR	3	2	1	P25705-2		0	2.53274e+06	1.51046	2	4.34945	0	0.01412	38.92	0.0354757	2	1624.89	0.744623	48.4671	0
	High	TGAIVDVPVGEELLGr	3	2	1	P25705-2	R16(Arg10)	0	1.47303e+06	2.10962	1		0	0.03258	29.65	0.287999	2	1634.9	-0.659138	48.754	0
	High	VLSIGDGIAR	3	2	1	P25705-2		0	2.46376e+06	1.39514	3	17.5939	0	0.04618	29.59	0.120891	2	1000.58	0.456562	34.0248	0
	High	TSIAIDTIINQK	3	2	1	P25705-2		0	704448	1.23544	3	6.40582	0	0.04804	28.21	0.297788	2	1316.74	-0.0534212	40.7071	0
	High	AVDSLVPIGR	2	2	1	P25705-2		0	2.11935e+06	1.77821	2	6.37203	0.001	0.07173	33.46	0.0519792	2	1026.59	0.480093	35.9242	0
	High	AVDSLVPIGr	1	2	1	P25705-2	R10(Arg10)	0	1.2434e+06				0.001	0.06713	27.16	0.211444	2	1036.6	0.506117	35.9532	0
	High	HALIIYDDLSk	1	2	1	P25705-2	K11(Lys8)	0	1.06047e+06				0.001	0.06795	22.04	1.37819	2	1295.71	-0.208958	36.7109	0
	High	HALIIYDDLSK	1	2	1	P25705-2		0	1.48316e+06	1.24003	1		0.003	0.1108	24.5	0.810216	2	1287.7	1.62106	36.6874	0
A0A087WUT6	Eukaryotic translation initiation factor 5B OS=Homo sapiens GN=EIF5B PE=1 SV=1 - [A0A087WUT6_HUMAN]	227.24	2.95	2	2	2	15	2.06746e+07	1.17542	8	2.24534	1220	138.597	5.57959
	A2	Sequence	# PSMs	# Proteins	# Protein Groups	Protein Group Accessions	Modifications	ΔCn	Area	Light/Heavy	Light/Heavy Count	Light/Heavy Variability [%]	q-Value	PEP	IonScore	Exp Value	Charge	MH+ [Da]	ΔM [ppm]	RT [min]	# Missed Cleavages
	High	NKPGPNIEsGNEDDDASFK	6	2	1	A0A087WUT6	S9(Phospho)	0	3.69219e+07	1.17899	5	0.796683	0	0.0007288	70.25	3.01014e-05	2	2113.88	1.86638	27.7185	0
	High	NkPGPNIEsGNEDDDASFk	6	2	1	A0A087WUT6	K2(Lys8); S9(Phospho); K19(Lys8)	0	3.2155e+07	1.14264	1		0	0.008804	53.19	0.00180955	2	2129.9	1.24274	27.6935	0
	High	QSFDDNDsEELEDKDSK	1	2	1	A0A087WUT6	S8(Phospho)	0	4.10837e+06	0.90996	1		0	0.03162	19.13	2.37518	2	2080.79	1.0158	25.6652	1
	High	QSFDDNDsEELEDkDSk	2	2	1	A0A087WUT6	S8(Phospho); K14(Lys8); K17(Lys8)	0	4.42741e+06	0.912649	1		0.001	0.08469	16.49	5.60858	2	2096.82	2.25175	25.6588	1
D6RAF8	Heterogeneous nuclear ribonucleoprotein D0 (Fragment) OS=Homo sapiens GN=HNRNPD PE=1 SV=1 - [D6RAF8_HUMAN]	224.43	23.53	8	4	4	10	3.91304e+06	1.47995	5	23.2745	221	23.0622	5.10986
	A2	Sequence	# PSMs	# Proteins	# Protein Groups	Protein Group Accessions	Modifications	ΔCn	Area	Light/Heavy	Light/Heavy Count	Light/Heavy Variability [%]	q-Value	PEP	IonScore	Exp Value	Charge	MH+ [Da]	ΔM [ppm]	RT [min]	# Missed Cleavages
	High	IFVGGLSPDTPEEk	3	8	1	D6RAF8	K14(Lys8)	0	6.10421e+06	1.48332	2	0.33669	0	0.00207	69.98	2.99828e-05	2	1496.78	1.83175	36.4611	0
	High	IFVGGLSPDTPEEK	3	8	1	D6RAF8		0	9.20993e+06	1.72794	1		0	0.001108	58.32	0.000454356	2	1488.76	1.04775	36.5577	0
	High	mFIGGLSWDTTk	1	8	1	D6RAF8	M1(Oxidation); K12(Lys8)	0	862165	1.19238	1		0	0.03804	15.16	7.76451	2	1379.68	0.707391	43.3512	0
	High	IDASKNEEDEGHsNSSPR	1	3	1	D6RAF8	S13(Phospho)	0	0				0	0.05956	13.81	11.8701	3	2051.83	1.22599	13.1113	1
	High	GFGFVLFK	1	8	1	D6RAF8		0	1.50117e+06	0.994796	1		0.003	0.1306	23.02	0.605646	2	914.513	-0.0951348	51.5377	0
	High	mFIGGLSWDTTK	1	8	1	D6RAF8	M1(Oxidation)	0	1.02803e+06				0.003	0.1276	14.51	8.91896	2	1371.66	-0.0611072	43.3266	0
P13645	Keratin, type I cytoskeletal 10 OS=Homo sapiens GN=KRT10 PE=1 SV=6 - [K1C10_HUMAN]	222.96	7.88	1	2	2	6	4.04033e+06	100	5	0	584	58.7917	5.21143
	A2	Sequence	# PSMs	# Proteins	# Protein Groups	Protein Group Accessions	Modifications	ΔCn	Area	Light/Heavy	Light/Heavy Count	Light/Heavy Variability [%]	q-Value	PEP	IonScore	Exp Value	Charge	MH+ [Da]	ΔM [ppm]	RT [min]	# Missed Cleavages
	High	GSLGGGFSSGGFSGGSFSR	4	1	1	P13645		0	7.20785e+06	100	3	0	0	8.289e-05	89.96	3.45013e-07	2	1707.77	1.52044	39.3827	0
	High	NVSTGDVNVEmNAAPGVDLTQLLNNmR	2	1	1	P13645	M11(Oxidation); M26(Oxidation)	0	872816	91.3905	2	13.4073	0	0.05425	17.97	14.7292	2	2904.39	0.793994	49.6431	0
O43390-4	Isoform 4 of Heterogeneous nuclear ribonucleoprotein R OS=Homo sapiens GN=HNRNPR - [HNRPR_HUMAN]	220.038	8.6	3	4	4	13	1.51233e+06	1.06213	10	21.9789	535	59.9158	9.15869
	A2	Sequence	# PSMs	# Proteins	# Protein Groups	Protein Group Accessions	Modifications	ΔCn	Area	Light/Heavy	Light/Heavy Count	Light/Heavy Variability [%]	q-Value	PEP	IonScore	Exp Value	Charge	MH+ [Da]	ΔM [ppm]	RT [min]	# Missed Cleavages
	High	TGYTLDVTTGQR	3	3	1	O43390-4		0	1941026	1.03358	2	17.1298	0	0.003845	74.51	8.14902e-06	2	1311.66	1.03666	30.5718	0
	High	TGYTLDVTTGQr	3	3	1	O43390-4	R12(Arg10)	0	1.99804e+06	1.23531	1		0	0.009909	51.63	0.00161427	2	1321.66	1.8841	30.5949	0
	High	NLATTVTEEILEK	3	3	1	O43390-4		0	1.33467e+06	0.97319	3	22.123	0	0.009816	44.3	0.0100407	2	1460.79	0.68088	51.965	0
	High	DLYEDELVPLFEK	2	3	1	O43390-4		0	768741	27.7193	2	602.341	0	0.0556	23.88	1.44919	2	1609.8	1.0348	55.0458	0
	High	AGPIWDLr	1	3	1	O43390-4	R8(Arg10)	0	1.20426e+06	0.851577	1		0.002	0.09084	39.83	0.0147929	2	937.513	-0.0792344	40.1368	0
	High	AGPIWDLR	1	3	1	O43390-4		0	1.18234e+06	0.959732	1		0.006	0.1854	31.33	0.120517	2	927.504	-0.640801	39.9309	0
P62805	Histone H4 OS=Homo sapiens GN=HIST1H4A PE=1 SV=2 - [H4_HUMAN]	197.206	29.13	1	3	3	13	2.86267e+06	1.27458	8	13.2952	103	11.3604	11.356
	A2	Sequence	# PSMs	# Proteins	# Protein Groups	Protein Group Accessions	Modifications	ΔCn	Area	Light/Heavy	Light/Heavy Count	Light/Heavy Variability [%]	q-Value	PEP	IonScore	Exp Value	Charge	MH+ [Da]	ΔM [ppm]	RT [min]	# Missed Cleavages
	High	VFLENVIR	2	1	1	P62805		0	3.38036e+06	1.16623	2	10.7276	0	0.03833	64.01	4.4267e-05	2	989.578	-0.0241285	40.9304	0
	High	ISGLIYEETR	3	1	1	P62805		0	2.95672e+06	1.28699	2	1.16917	0	0.009268	47.42	0.00352487	2	1180.62	0.745709	33.3299	0
	High	ISGLIYEETr	4	1	1	P62805	R10(Arg10)	0	2.44293e+06	1.27228	1		0	0.01044	44.67	0.00667715	2	1190.63	0.663608	33.3648	0
	High	DNIQGITKPAIR	3	1	1	P62805		0	2.25095e+06	100	3	0	0	0.06067	27.07	0.322973	2	1325.76	1.34066	28.1926	0
	High	DNIQGITkPAIr	1	1	1	P62805	K8(Lys8); R12(Arg10)	0	0				0.003	0.1346	23.49	0.545763	2	1343.78	5.22358	28.2369	0
Q9H3N1	Thioredoxin-related transmembrane protein 1 OS=Homo sapiens GN=TMX1 PE=1 SV=1 - [TMX1_HUMAN]	196.139	7.5	1	2	2	10	2.35049e+06	0.983267	6	39.9035	280	31.7708	4.98291
	A2	Sequence	# PSMs	# Proteins	# Protein Groups	Protein Group Accessions	Modifications	ΔCn	Area	Light/Heavy	Light/Heavy Count	Light/Heavy Variability [%]	q-Value	PEP	IonScore	Exp Value	Charge	MH+ [Da]	ΔM [ppm]	RT [min]	# Missed Cleavages
	High	VEEEQEADEEDVsEEEAESK	4	1	1	Q9H3N1	S13(Phospho)	0	2.65403e+06	0.983267	2	3.52387	0	0.006521	52.02	0.0012087	2	2389.9	1.47518	25.7452	0
	High	VEEEQEADEEDVsEEEAESk	3	1	1	Q9H3N1	S13(Phospho); K20(Lys8)	0	2.61509e+06	1.40872	1		0	0.001667	45.63	0.00616666	2	2397.91	1.96312	26.1942	0
	High	KVEEEQEADEEDVsEEEAESK	3	1	1	Q9H3N1	S14(Phospho)	0	2.04695e+06	0.696413	3	89.768	0	0.0488	33.99	0.136227	2	2517.99	1.59433	24.5801	1
Q14141-2	Isoform I of Septin-6 OS=Homo sapiens GN=SEPT6 - [SEPT6_HUMAN]	194.458	18.03	4	4	4	16	2.90509e+06	1.31646	9	21.534	427	48.842	6.81494
	A2	Sequence	# PSMs	# Proteins	# Protein Groups	Protein Group Accessions	Modifications	ΔCn	Area	Light/Heavy	Light/Heavy Count	Light/Heavy Variability [%]	q-Value	PEP	IonScore	Exp Value	Charge	MH+ [Da]	ΔM [ppm]	RT [min]	# Missed Cleavages
	High	TAAELLQSQGSQAGGSQTLk	4	4	1	Q14141-2	K20(Lys8)	0	1.61231e+06	0.990743	3	13.1152	0	0.0006045	56.83	0.000887233	2	1983.02	-0.0601818	31.936	0
	High	FEGEPATHTQPGVQLQSNTYDLQESNVR	2	4	1	Q14141-2		0	5.30812e+06	1.63557	1		0	0.0004768	49.26	0.0124476	3	3145.49	2.73297	36.9076	0
	High	TAAELLQSQGSQAGGSQTLK	3	4	1	Q14141-2		0	1.64868e+06				0	0.0008315	43.25	0.0209038	2	1975.01	2.36973	31.7308	0
	High	TVPLAGHVGFDSLPDQLVNK	3	4	1	Q14141-2		0	1.75847e+06	1.38387	2	10.3617	0	0.008909	21.31	2.84526	3	2107.12	1.15342	46.0093	0
	High	TVPLAGHVGFDSLPDQLVNk	2	4	1	Q14141-2	K20(Lys8)	0	907976	1.56713	1		0	0.04631	18	5.62558	3	2115.13	0.870976	46.3081	0
	High	VNIIPIIAK	2	4	1	Q14141-2		0	1.3897e+06	1.41446	2	10.6755	0.003	0.1141	30	0.02	2	980.65	-0.0776849	44.3834	0
F5H1Y3	Flap endonuclease 1 (Fragment) OS=Homo sapiens GN=FEN1 PE=1 SV=1 - [F5H1Y3_HUMAN]	193.798	16.36	2	2	2	12	1.82529e+06	1.2307	6	25.7074	165	18.2633	7.37158
	A2	Sequence	# PSMs	# Proteins	# Protein Groups	Protein Group Accessions	Modifications	ΔCn	Area	Light/Heavy	Light/Heavy Count	Light/Heavy Variability [%]	q-Value	PEP	IonScore	Exp Value	Charge	MH+ [Da]	ΔM [ppm]	RT [min]	# Missed Cleavages
	High	QLQQAQAAGAEQEVEk	3	2	1	F5H1Y3	K16(Lys8)	0	1.56201e+06	0.952036	1		0	0.000727	58.85	0.000508626	2	1735.87	1.06318	24.7722	0
	High	QLQQAQAAGAEQEVEK	3	2	1	F5H1Y3		0	1.661e+06	1.04981	2	6.8496	0	0.002921	52.85	0.00197689	2	1727.86	1.30253	25.1162	0
	High	LIADVAPSAIr	3	2	1	F5H1Y3	R11(Arg10)	0	1.29445e+06	1.45967	2	0.766927	0	0.0212	48.38	0.00132723	2	1135.67	1.26848	35.0573	0
	High	LIADVAPSAIR	3	2	1	F5H1Y3		0	1.98958e+06	1.37768	1		0	0.01951	36.17	0.0250846	2	1125.66	0.275541	35.0519	0
P13796	Plastin-2 OS=Homo sapiens GN=LCP1 PE=1 SV=6 - [PLSL_HUMAN]	192.56	5.58	1	3	3	10	2.07961e+06	1.19501	7	17.6487	627	70.2439	5.42725
	A2	Sequence	# PSMs	# Proteins	# Protein Groups	Protein Group Accessions	Modifications	ΔCn	Area	Light/Heavy	Light/Heavy Count	Light/Heavy Variability [%]	q-Value	PEP	IonScore	Exp Value	Charge	MH+ [Da]	ΔM [ppm]	RT [min]	# Missed Cleavages
	High	FSLVGIGGQDLNEGNR	3	1	1	P13796		0	3.38611e+06	1.06187	1		0	0.003205	66.03	9.36346e-05	2	1675.84	1.22639	43.2962	0
	High	FSLVGIGGQDLNEGNr	3	1	1	P13796	R16(Arg10)	0	2.93102e+06	1.13883	2	3.06599	0	0.004572	54.02	0.00152884	2	1685.85	0.803514	43.2303	0
	High	LSPEELLLR	2	1	1	P13796		0	1.27562e+06	14.8326	2	5472.46	0	0.02888	40.52	0.0112758	2	1069.63	0.503653	45.4897	0
	High	QFVTATDVVR	1	1	1	P13796		0	1.57711e+06	1.424	1		0.001	0.08339	18.24	2.61695	2	1135.61	0.530422	32.3272	0
	High	QFVTATDVVr	1	1	1	P13796	R10(Arg10)	0	1.13211e+06	1.19501	1		0.003	0.1302	16.94	3.71224	2	1145.62	0.55353	32.6358	0
Q15084-3	Isoform 3 of Protein disulfide-isomerase A6 OS=Homo sapiens GN=PDIA6 - [PDIA6_HUMAN]	191.183	7.32	5	2	2	8	1.78535e+06	1.58956	6	28.843	437	47.8081	5.08447
	A2	Sequence	# PSMs	# Proteins	# Protein Groups	Protein Group Accessions	Modifications	ΔCn	Area	Light/Heavy	Light/Heavy Count	Light/Heavy Variability [%]	q-Value	PEP	IonScore	Exp Value	Charge	MH+ [Da]	ΔM [ppm]	RT [min]	# Missed Cleavages
	High	LAAVDATVNQVLASR	3	5	1	Q15084-3		0	1.58205e+06	1.74064	2	12.4267	0	0.0002429	72.21	1.36196e-05	2	1527.85	0.5025	44.5406	0
	High	LAAVDATVNQVLASr	1	5	1	Q15084-3	R15(Arg10)	0	972134	1.57801	1		0	0.005136	46.29	0.00541238	2	1537.86	-0.115119	44.3264	0
	High	GSTAPVGGGAFPTIVER	3	5	1	Q15084-3		0	1.98864e+06	1.29228	3	19.5938	0	0.00343	37.78	0.0566114	2	1615.84	0.515434	39.4676	0
	High	GSTAPVGGGAFPTIVEr	1	5	1	Q15084-3	R17(Arg10)	0	1.06688e+06				0.001	0.08675	14.99	10.7924	2	1625.85	0.381647	39.48	0
A6NNK5	Tumor suppressor p53-binding protein 1 OS=Homo sapiens GN=TP53BP1 PE=1 SV=2 - [A6NNK5_HUMAN]	176.087	5.03	4	5	5	15	2.08482e+06	1.34771	9	13.9813	1927	208.89	4.66553
	A2	Sequence	# PSMs	# Proteins	# Protein Groups	Protein Group Accessions	Modifications	ΔCn	Area	Light/Heavy	Light/Heavy Count	Light/Heavy Variability [%]	q-Value	PEP	IonScore	Exp Value	Charge	MH+ [Da]	ΔM [ppm]	RT [min]	# Missed Cleavages
	High	NsPEDLGLSLTGDScK	4	4	1	A6NNK5	S2(Phospho); C15(Carbamidomethyl)	0	2.63314e+06	1.28593	2	6.96528	0	0.003754	58.8	0.000323632	2	1772.74	1.91454	40.6111	0
	High	NsPEDLGLSLTGDSck	3	4	1	A6NNK5	S2(Phospho); C15(Carbamidomethyl); K16(Lys8)	0	2.00919e+06	1.18394	1		0	0.02413	42.95	0.0143453	2	1780.76	0.78732	40.4725	0
[truncated: 573 more rows]

## Sheet: Membrane
Accession	Description	Score	Coverage	# Proteins	# Unique Peptides	# Peptides	# PSMs	Area	Light/Heavy	Light/Heavy Count	Light/Heavy Variability [%]	# AAs	MW [kDa]	calc. pI
[truncated: 952 more rows]
